# Supplementary material for: Understanding dynamic voltammetry in a dissolving microdroplet
Source: Royal Society of Chemistry journal article supplement (doi:10.1039/d4an00299g), 2024-01-01
Supplement: d4an00299g1.pdf [file d4an00299g1.pdf]

# Understanding Dynamic Voltammetry in a Dissolving Microdroplet

# Contents

- 1. Global Definitions .....**
  - 1.1. Parameters .....
- 2. Component 1 .....**
  - 2.1. Definitions .....
  - 2.2. Geometry 1 .....
  - 2.3. Transport of Diluted Species in droplet.....
  - 2.4. Moving Mesh .....
  - 2.5. Meshes.....
- 3. Study 1 (CV 1 to 39).....**
  - 3.1. Time Dependent .....
  - 3.2. Solver Configurations .....
- 4. Study 2 (CV 40 to 44).....**
  - 4.1. Time Dependent .....
  - 4.2. Solver Configurations .....
- 5. Study 3 (CV 21 to 30).....**
  - 5.1. Time Dependent .....
  - 5.2. Solver Configurations .....
- 6. Study 4 (CV 31 to 38).....**
  - 6.1. Time Dependent .....
  - 6.2. Solver Configurations .....
- 7. Study 5 (CV 39 to 44).....**
  - 7.1. Time Dependent .....
  - 7.2. Solver Configurations .....
- 8. Results .....**
  - 8.1. Datasets.....
  - 8.2. Derived Values.....
  - 8.3. Tables .....
  - 8.4. Plot Groups .....

# 1 Global Definitions

## 1.1 PARAMETERS

### PARAMETERS 1

| Name       | Expression                            | Value                     | Description                                                |
|------------|---------------------------------------|---------------------------|------------------------------------------------------------|
| f          | $F_{\text{const}}/R_{\text{const}}/T$ | 38.941 1/V                |                                                            |
| T          | 298[K]                                | 298 K                     | temperature                                                |
| r_elec     | 6.35[um]                              | 6.35E-6 m                 | radius of the electrode                                    |
| C0         | 0.155[mM]                             | 0.155 mol/m <sup>3</sup>  | initial concentration of redox (ox+red)                    |
| C0_ox_ini  | $C0*0.2$                              | 0.031 mol/m <sup>3</sup>  | initial conc. of ox in the cell                            |
| C0_red_ini | $C0*0.8$                              | 0.124 mol/m <sup>3</sup>  | initial conc. of red in the cell                           |
| Dred       | 8.8e-6[cm <sup>2</sup> /s]            | 8.8E-10 m <sup>2</sup> /s | diffusion coefficient of DmFc in DCE                       |
| Dox        | 5.3e-6 [cm <sup>2</sup> /s]           | 5.3E-10 m <sup>2</sup> /s | diffusion coefficient of DmFc+ in DCE                      |
| alp        | 0.5                                   | 0.5                       | transfer coefficient for DmFc+/DmFc                        |
| k0         | 0.01[m/s]                             | 0.01 m/s                  | standard rate constant of electron transfer for DmFc+/DmFc |
| E0         | -0.04[V]                              | -0.04 V                   | apparent standard potential for DmFc+/DmFc                 |
| sr         | 0.2[V/s]                              | 0.2 V/s                   | scan rate                                                  |
| Ei         | -0.35[V]                              | -0.35 V                   | starting potential                                         |
| Ef         | 0.2[V]                                | 0.2 V                     | vertex potential                                           |
| nb         | 44                                    | 44                        | number of CVs                                              |
| t_tot      | $nb^2*abs(Ei - Ef)/sr$                | 242 s                     | duration of the experiment                                 |
| t_cv       | $t_{\text{tot}}/nb$                   | 5.5 s                     | duration of one CV                                         |
| L          | 51[um]                                | 5.1E-5 m                  | initial radius of the droplet                              |
| a          | 149[deg]                              | 2.6005 rad                | contact angle in degree                                    |
| hg         | $-L*\cos(a)$                          | 4.3716E-5 m               | initial height of the spherical cap                        |
| rc         | $L*\cos((a - \pi/2))$                 | 2.6267E-5 m               | initial contact radius of                                  |

| Name            | Expression                                          | Value                     | Description                                             |
|-----------------|-----------------------------------------------------|---------------------------|---------------------------------------------------------|
|                 |                                                     |                           | the droplet                                             |
| C0_CIO4         | 0.01 [M]                                            | 10 mol/m <sup>3</sup>     | initial concentration of CIO4                           |
| Rs0             | 1E8[ohm]                                            | 1E8 Ω                     | initial resistance of the cell                          |
| kloss_red       | 0.08e-8 [m/s]                                       | 8E-10 m/s                 | rate of DmFc tranfert from DCE to water                 |
| kloss_ox        | 1.2e-8 [m/s]                                        | 1.2E-8 m/s                | rate of DmFc+ tranfert from DCE to water                |
| D_water         | 6E-6 [cm^2/s]                                       | 6E-10 m <sup>2</sup> /s   | diffusion coeff of DCE in water                         |
| C0_water        | 55 [mol/L]                                          | 55000 mol/m <sup>3</sup>  | concentration of pure water                             |
| Csat_DCEinWater | 90[mM]                                              | 90 mol/m <sup>3</sup>     | concentration of DCE in water at saturation             |
| Kp_DCE          | C0_water/Csat_DCEinWater                            | 611.11                    | partitioning coefficient between water and DCE          |
| Vang            | -0.043[rad/s]                                       | -0.043 rad/s              | angular dissolution rate in CCR mode                    |
| Vang_deg        | -2.5[deg/s]                                         | -0.043633 rad/s           | angular dissolution rate in CCR mode                    |
| t_c             | 200[s]                                              | 200 s                     | transion time from CCA to CCR                           |
| V_ini           | V_sphere-V_cap                                      | 5.4755E-13 m <sup>3</sup> | initial volume for contact angle larger than 90 deg     |
| V_sphere        | ((4/3)*pi*L^3)                                      | 5.5565E-13 m <sup>3</sup> | volume of sphere                                        |
| V_cap           | ((1/6)*pi*(L - hg)*(3*rc^2 + (L - hg)^2))           | 8.0971E-15 m <sup>3</sup> | volume of small cap (contact angle smaller than 90 deg) |
| n_ini           | 8.48246935651237E-14 [mol]                          | 8.4825E-14 mol            |                                                         |
| E0ini           | E0 + (R_const*T/F_const)*log( (C0_ox_ini)/C0_CIO4 ) | -0.18833 V                |                                                         |

## 2 Component 1

Date Apr 3, 2023 2:12:39 PM

### SETTINGS

| Description             | Value                      |
|-------------------------|----------------------------|
| Unit system             | Same as global system (SI) |
| Geometry shape function | Automatic                  |

### SPATIAL FRAME COORDINATES

| First | Second | Third |
|-------|--------|-------|
| r     | phi    | z     |

### MATERIAL FRAME COORDINATES

| First | Second | Third |
|-------|--------|-------|
| R     | PHI    | Z     |

### GEOMETRY FRAME COORDINATES

| First | Second           | Third          |
|-------|------------------|----------------|
| Rg    | PHI <sub>g</sub> | Z <sub>g</sub> |

### MESH FRAME COORDINATES

| First          | Second           | Third          |
|----------------|------------------|----------------|
| R <sub>m</sub> | PHI <sub>m</sub> | Z <sub>m</sub> |

## 2.1 DEFINITIONS

### 2.1.1 Variables

#### global variable

#### SELECTION

Geometric entity level Entire model

| Name             | Expression    | Unit           | Description                        |
|------------------|---------------|----------------|------------------------------------|
| n <sub>Ox</sub>  | intop2(cOx)   | mol            | amount of DmFc+ inside the droplet |
| n <sub>Red</sub> | intop2(cRed)  | mol            | amount of DmFc inside the droplet  |
| Vol              | intop2(1*1*1) | m <sup>3</sup> | volume of the droplet              |

| Name    | Expression                                                                                                                     | Unit           | Description                                                                 |
|---------|--------------------------------------------------------------------------------------------------------------------------------|----------------|-----------------------------------------------------------------------------|
| Surf    | intop3(1*1)                                                                                                                    | m <sup>2</sup> | surface of the droplet (DCE/water boundary)                                 |
| h       | maxop1(z)                                                                                                                      | m              | droplet's height                                                            |
| Rc      | maxop1(r)                                                                                                                      | m              | droplet's radius                                                            |
| r_c     | maxop2(r)                                                                                                                      | m              | contact radius                                                              |
| tetha   | 2*atan(h/r_c)                                                                                                                  | rad            | contact angle                                                               |
| Vr_CCR  | $((r_c/\sin(\text{tetha})) * (1 - \cos(\text{tetha})) - z) * ((z/\sin(\text{tetha})) * \text{Vang}(t)) / r$                    | m/s            | 'r' component of mesh velocity in CCR                                       |
| Vz_CCR  | $(z/\sin(\text{tetha})) * \text{Vang}(t)$                                                                                      | m/s            | 'z' component of mesh velocity in CCR                                       |
| Vr_CCA  | $\text{Vn}(t) * (r/Rc)$                                                                                                        | m/s            | 'r' component of mesh velocity in CCA                                       |
| Vz_CCA  | $\text{Vn}(t) * (z/Rc)$                                                                                                        | m/s            | 'z' component of mesh velocity in CCA                                       |
| DE      | $\text{Rs0} * (\text{C0\_ox\_ini} / (\text{n\_Ox/Vol} + \text{C0\_ox\_ini})) * \text{current}$                                 | V              | ohmic loss inside the droplet as a function of [DmFc+]                      |
| E0j     | $\text{E0} + (\text{R\_const} * \text{T} / \text{F\_const}) * \log((\text{n\_Ox/Vol} + \text{C0\_ox\_ini}) / \text{C0\_ClO4})$ | V              | standard potential corrected from junction potential at water/DCE interface |
| current | $\text{F\_const} * \text{Dred} * \text{intop1}(c\text{Redz})$                                                                  | A              | current at the electrode                                                    |

## 2.1.2 Functions

### Triangle 1

|               |          |
|---------------|----------|
| Function name | tri1     |
| Function type | Triangle |

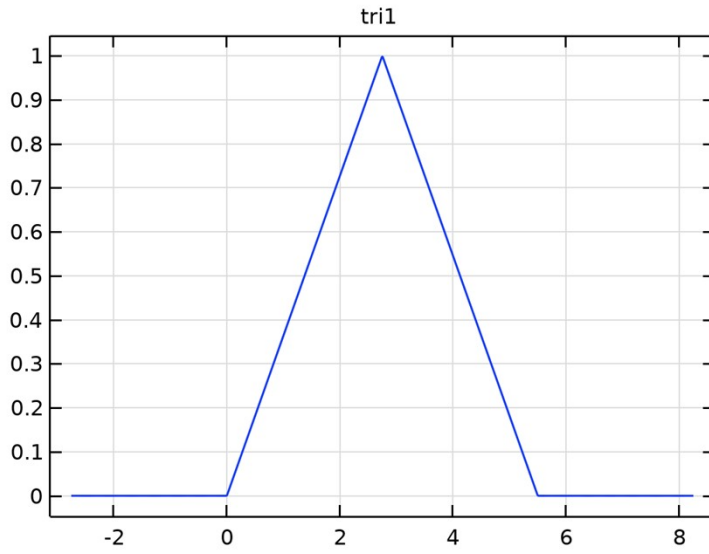

Triangle 1

PARAMETERS

| Description | Value               |
|-------------|---------------------|
| Lower limit | 0                   |
| Upper limit | $t_{\text{tot}}/nb$ |

SMOOTHING

| Description             | Value |
|-------------------------|-------|
| Size of transition zone | 0.001 |

potential ramp

|               |          |
|---------------|----------|
| Function name | pot      |
| Function type | Analytic |

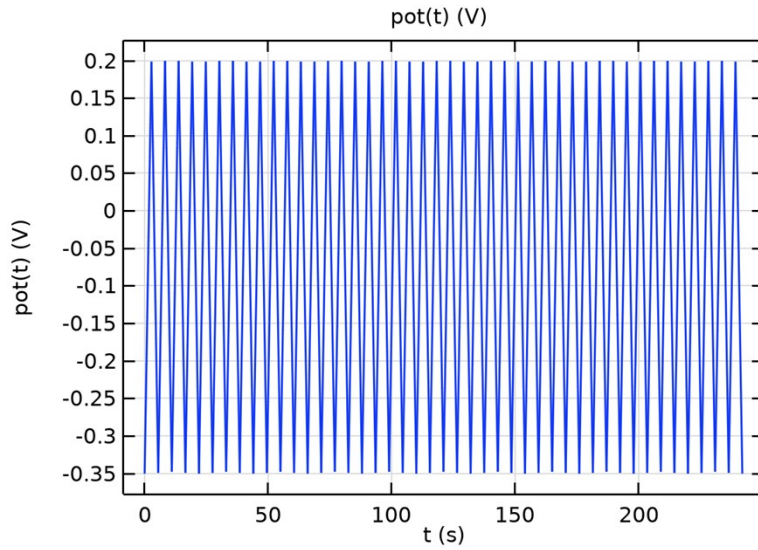

*potential ramp*

#### DEFINITION

| Description | Value                                                                   |
|-------------|-------------------------------------------------------------------------|
| Expression  | $E_i + \text{sign}(E_f - E_i) * \text{abs}(E_i - E_f) * \text{tri1}(t)$ |
| Arguments   | t                                                                       |

#### PERIODIC EXTENSION

| Description   | Value               |
|---------------|---------------------|
| Make periodic | On                  |
| Lower limit   | 0                   |
| Upper limit   | $t_{\text{tot}}/nb$ |

#### UNITS

| Description | Value |
|-------------|-------|
| Arguments   | s     |
| Function    | V     |

#### reduction rate

|               |          |
|---------------|----------|
| Function name | kred     |
| Function type | Analytic |



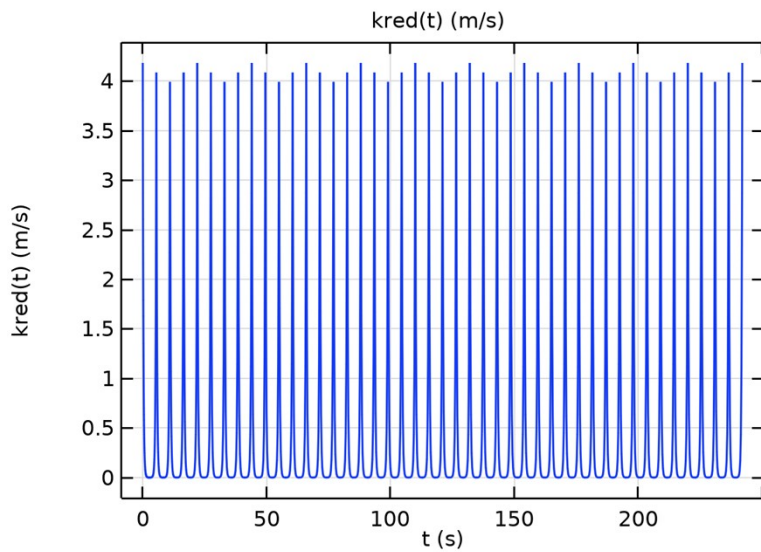

*reduction rate*

#### DEFINITION

| Description | Value                                                           |
|-------------|-----------------------------------------------------------------|
| Expression  | $k_0 \cdot \exp(-\alpha_p \cdot f \cdot (\text{pot}(t) - E_0))$ |
| Arguments   | t                                                               |

#### UNITS

| Description | Value |
|-------------|-------|
| Arguments   | s     |
| Function    | m/s   |

#### oxidation rate

|               |          |
|---------------|----------|
| Function name | kox      |
| Function type | Analytic |

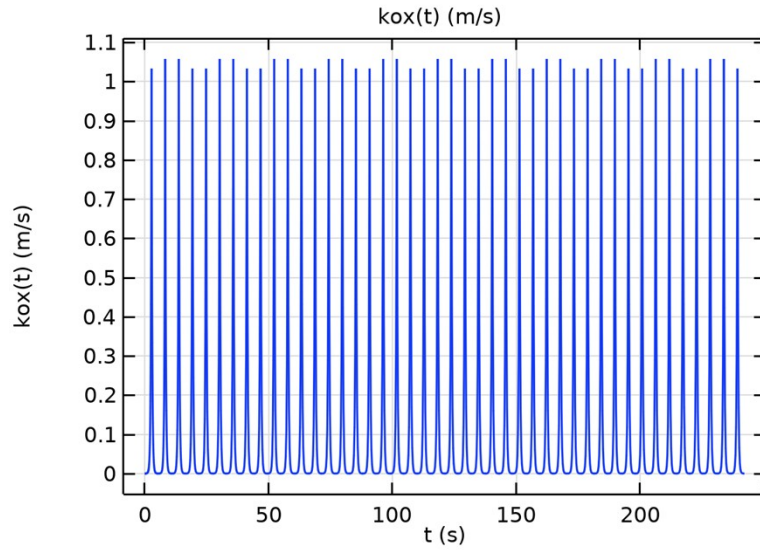

*oxidation rate*

#### DEFINITION

| Description | Value                                                                |
|-------------|----------------------------------------------------------------------|
| Expression  | $k_0 \cdot \exp((1 - \alpha_p) \cdot f \cdot (\text{pot}(t) - E_0))$ |
| Arguments   | t                                                                    |

#### UNITS

| Description | Value |
|-------------|-------|
| Arguments   | s     |
| Function    | m/s   |

#### Interpolation o/w velocity CCA

|                |               |
|----------------|---------------|
| Function names | Vn            |
| Function type  | Interpolation |

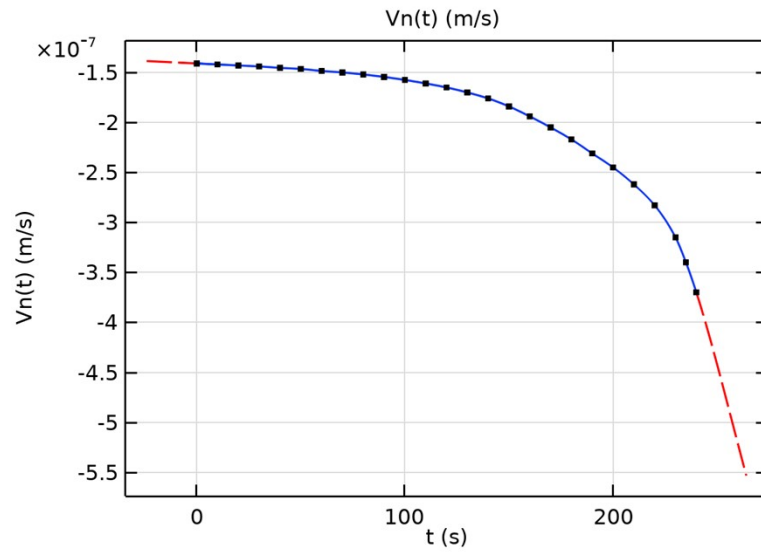

*Interpolation o/w velocity CCA*

#### INTERPOLATION AND EXTRAPOLATION

| Description   | Value            |
|---------------|------------------|
| Interpolation | Piecewise cubic  |
| Extrapolation | Nearest function |

#### UNITS

| Description | Value |
|-------------|-------|
| Arguments   | s     |
| Function    | m/s   |

#### Interpolation o/w velocity CCR

|                |               |
|----------------|---------------|
| Function names | Vang          |
| Function type  | Interpolation |

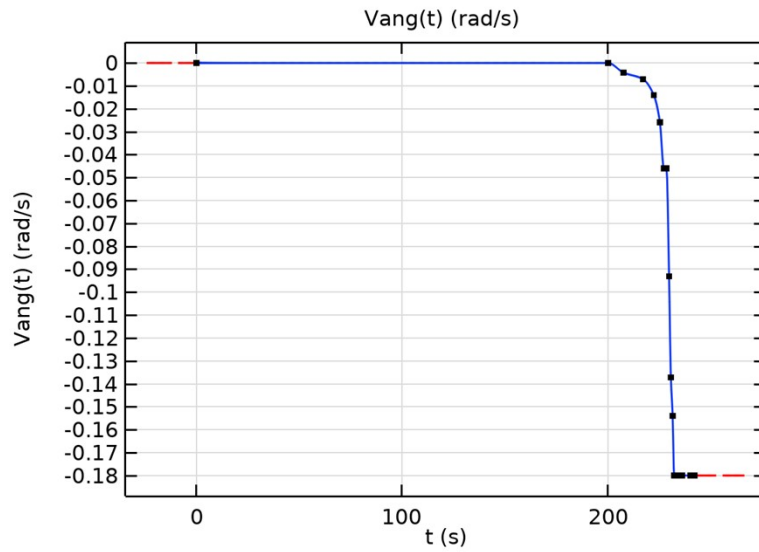

*Interpolation o/w velocity CCR*

#### INTERPOLATION AND EXTRAPOLATION

| Description   | Value            |
|---------------|------------------|
| Interpolation | Piecewise cubic  |
| Extrapolation | Nearest function |

#### UNITS

| Description | Value |
|-------------|-------|
| Arguments   | s     |
| Function    | rad/s |

#### **o/w velocity from video**

|               |              |
|---------------|--------------|
| Function name | $V_n\_video$ |
| Function type | Analytic     |

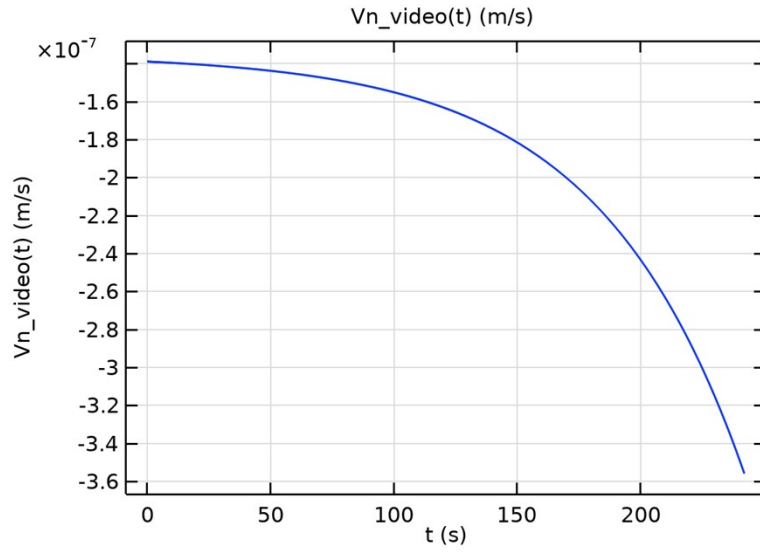

*o/w velocity from video*

#### DEFINITION

| Description | Value                                                                            |
|-------------|----------------------------------------------------------------------------------|
| Expression  | $-1e-6*((0.21279/58.87117)*\exp(t/58.87117) + (579735/4282415)*\exp(t/4282415))$ |
| Arguments   | t                                                                                |

#### UNITS

| Description | Value |
|-------------|-------|
| Arguments   | s     |
| Function    | m/s   |

**o/w radius from video**

|               |          |
|---------------|----------|
| Function name | Rn_video |
| Function type | Analytic |

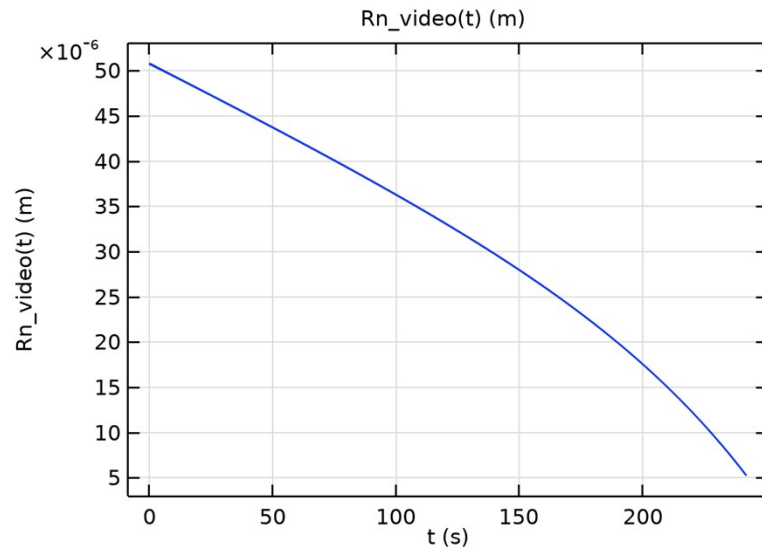

*o/w radius from video*

#### DEFINITION

| Description | Value                                                               |
|-------------|---------------------------------------------------------------------|
| Expression  | $1e-6*(579786 - 0.21279*\exp(t/58.87117) - 579735*\exp(t/4282415))$ |
| Arguments   | t                                                                   |

#### UNITS

| Description | Value |
|-------------|-------|
| Arguments   | s     |
| Function    | m     |

#### contact radius in CCA

|               |           |
|---------------|-----------|
| Function name | R_contact |
| Function type | Analytic  |

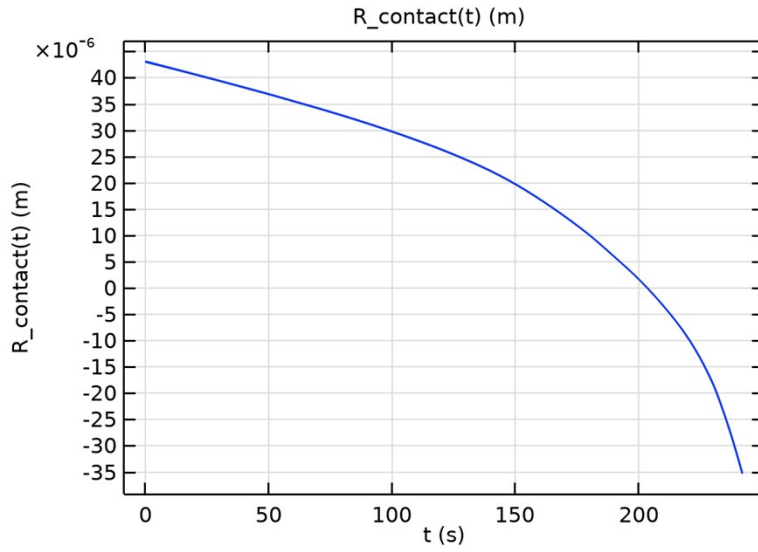

*contact radius in CCA*

**DEFINITION**

| Description | Value                                     |
|-------------|-------------------------------------------|
| Expression  | $(L + V_n(t) \cdot t) \cdot \cos(a - 90)$ |
| Arguments   | t                                         |

**UNITS**

| Description | Value |
|-------------|-------|
| Arguments   | s     |
| Function    | m     |

**compensation for mass loss**

|                |               |
|----------------|---------------|
| Function names | loss          |
| Function type  | Interpolation |

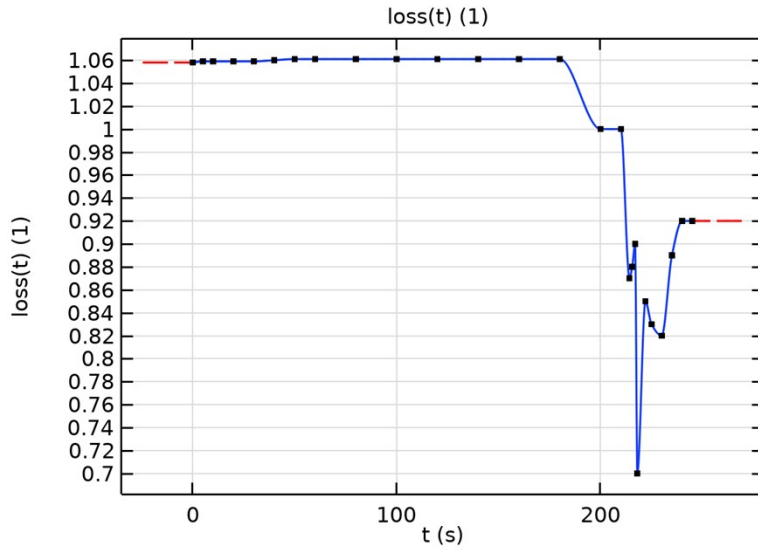

*compensation for mass loss*

#### INTERPOLATION AND EXTRAPOLATION

| Description   | Value           |
|---------------|-----------------|
| Interpolation | Piecewise cubic |

#### UNITS

| Description | Value |
|-------------|-------|
| Arguments   | s     |
| Function    | 1     |

### 2.1.3 Nonlocal Couplings

#### Integration over electrode surface

|               |             |
|---------------|-------------|
| Coupling type | Integration |
| Operator name | intop1      |

#### SELECTION

|                        |                                         |
|------------------------|-----------------------------------------|
| Geometric entity level | Boundary                                |
| Selection              | Geometry geom1: Dimension 1: Boundary 2 |



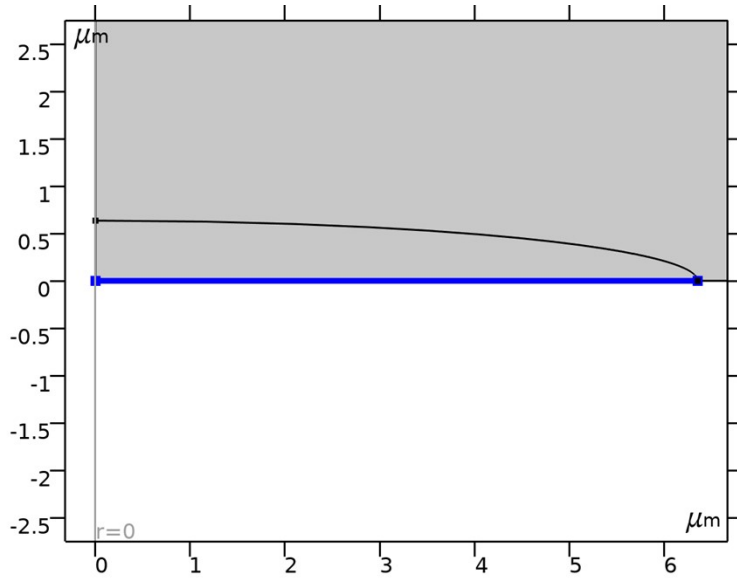

Selection

ADVANCED

| Description                           | Value |
|---------------------------------------|-------|
| Compute integral in revolved geometry | On    |

Integration over droplet volume

|               |             |
|---------------|-------------|
| Coupling type | Integration |
| Operator name | intop2      |

SELECTION

|                        |                                          |
|------------------------|------------------------------------------|
| Geometric entity level | Domain                                   |
| Selection              | Geometry geom1: Dimension 2: Domains 1–2 |

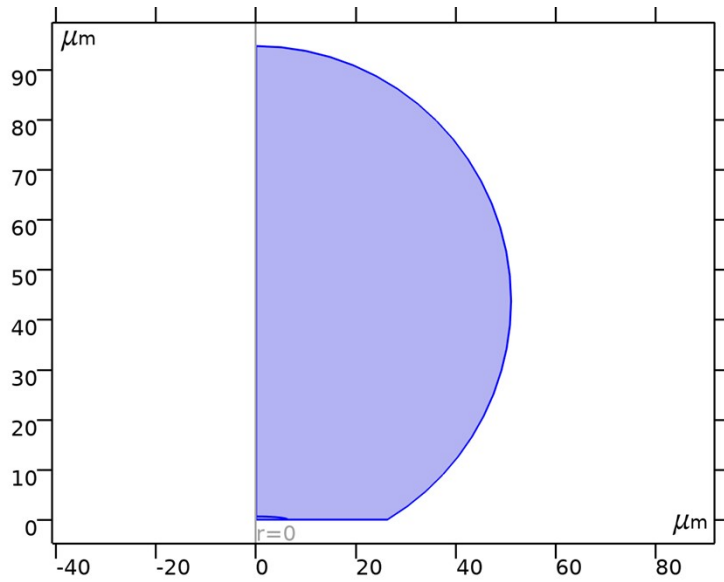

Selection

ADVANCED

| Description                           | Value |
|---------------------------------------|-------|
| Compute integral in revolved geometry | On    |

Integration over o/w surface

|               |             |
|---------------|-------------|
| Coupling type | Integration |
| Operator name | intop3      |

SELECTION

|                        |                                             |
|------------------------|---------------------------------------------|
| Geometric entity level | Boundary                                    |
| Selection              | Geometry geom1: Dimension 1: Boundaries 6–7 |

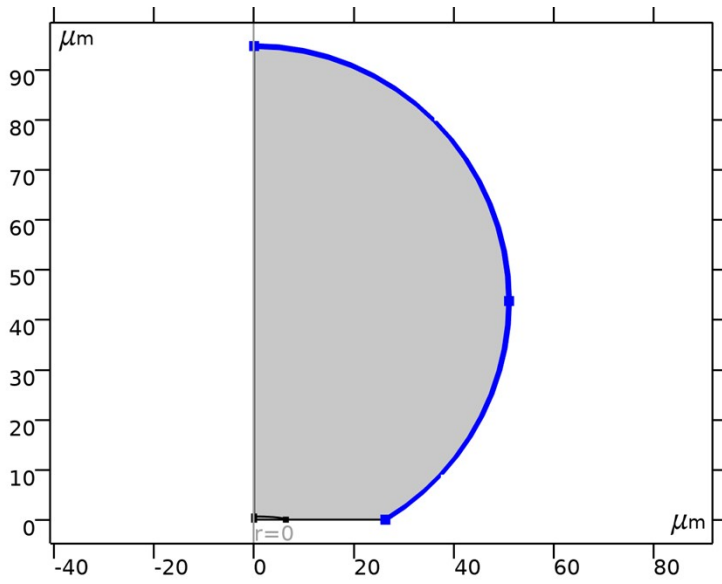

Selection

ADVANCED

| Description                           | Value |
|---------------------------------------|-------|
| Compute integral in revolved geometry | On    |

o/w arc

|               |         |
|---------------|---------|
| Coupling type | Maximum |
| Operator name | maxop1  |

SELECTION

|                        |                                             |
|------------------------|---------------------------------------------|
| Geometric entity level | Boundary                                    |
| Selection              | Geometry geom1: Dimension 1: Boundaries 6-7 |

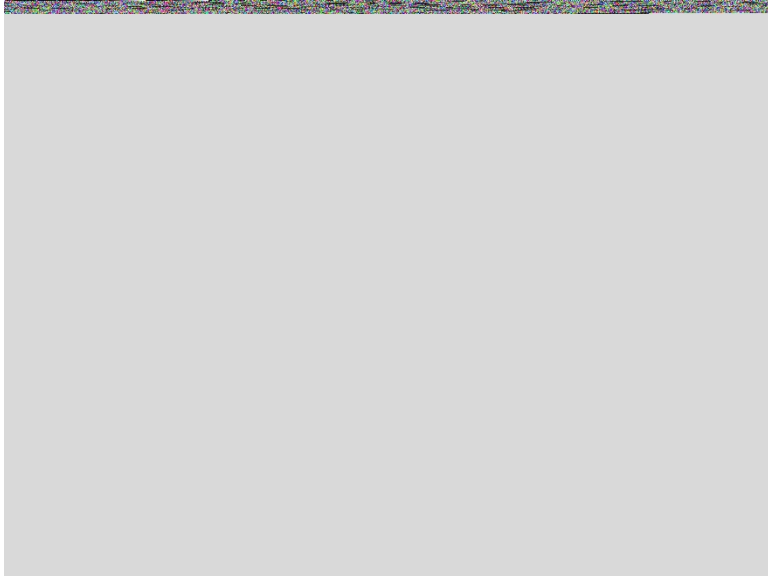

*Selection*

**contact line**

|               |         |
|---------------|---------|
| Coupling type | Maximum |
| Operator name | maxop2  |

**SELECTION**

|                        |                                      |
|------------------------|--------------------------------------|
| Geometric entity level | Point                                |
| Selection              | Geometry geom1: Dimension 0: Point 5 |

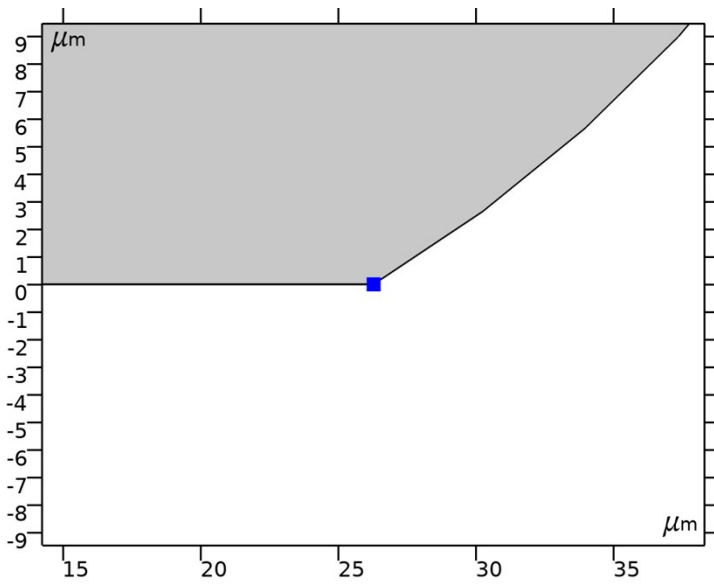

*Selection*

## 2.1.4 Coordinate Systems

### Boundary System 1

|                        |                 |
|------------------------|-----------------|
| Coordinate system type | Boundary system |
| Tag                    | sys1            |

#### COORDINATE NAMES

| First | Second | Third |
|-------|--------|-------|
| t1    | to     | n     |

## 2.2 GEOMETRY 1

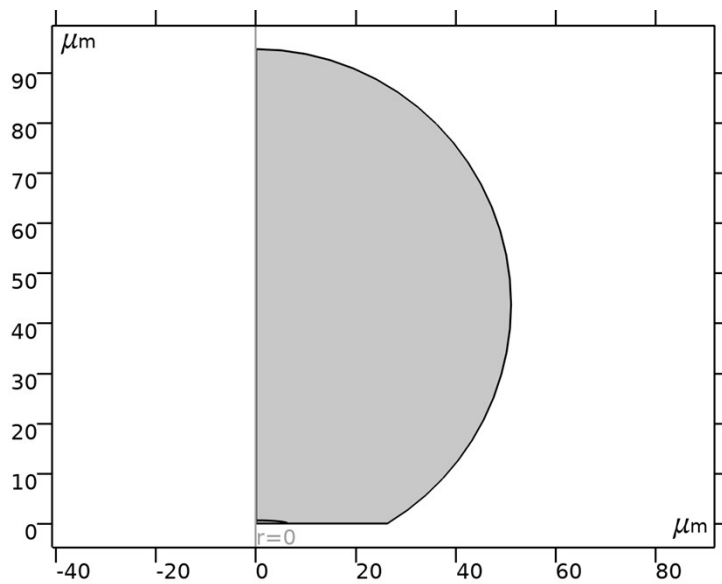

### Geometry 1

#### UNITS

|              |               |
|--------------|---------------|
| Length unit  | $\mu\text{m}$ |
| Angular unit | rad           |

#### GEOMETRY STATISTICS

| Description          | Value |
|----------------------|-------|
| Space dimension      | 2     |
| Number of domains    | 2     |
| Number of boundaries | 7     |
| Number of vertices   | 6     |

### 2.2.1 electrode (ls1)

#### SETTINGS

| Description | Value       |
|-------------|-------------|
| Specify     | Coordinates |
| Coordinates | {0, 0}      |
| Specify     | Coordinates |
| Coordinates | {r_elec, 0} |

### 2.2.2 droplet (c1)

#### POSITION

| Description | Value   |
|-------------|---------|
| Position    | {0, hg} |

#### SIZE AND SHAPE

| Description  | Value |
|--------------|-------|
| Radius       | L     |
| Sector angle | 360   |

### 2.2.3 fixed diffusion layer (e1)

#### POSITION

| Description | Value  |
|-------------|--------|
| Position    | {0, 0} |

#### SIZE AND SHAPE

| Description  | Value      |
|--------------|------------|
| a-semiaxis   | 1.0*r_elec |
| b-semiaxis   | 0.1*r_elec |
| Sector angle | 360        |

### 2.2.4 Rectangle for subtraction (r1)

#### POSITION

| Description | Value          |
|-------------|----------------|
| Position    | {-10*L, -10*L} |

#### SIZE

| Description | Value |
|-------------|-------|
| Width       | 20*L  |
| Height      | 10*L  |

## 2.2.5 Rectangle for subtraction 1 (r2)

### POSITION

| Description | Value   |
|-------------|---------|
| Position    | {-L, L} |
| Base        | Center  |

### SIZE

| Description | Value |
|-------------|-------|
| Width       | 2*L   |
| Height      | 2*L   |

## 2.3 TRANSPORT OF DILUTED SPECIES IN DROPLET

### USED PRODUCTS

|                                      |
|--------------------------------------|
| COMSOL Multiphysics                  |
| Chemical Reaction Engineering Module |

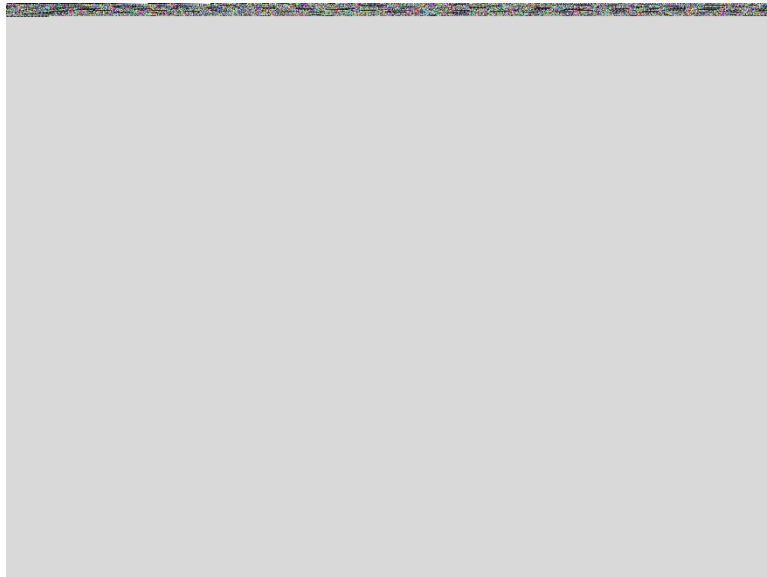

*Transport of Diluted Species in droplet*

### SELECTION

|                        |                                          |
|------------------------|------------------------------------------|
| Geometric entity level | Domain                                   |
| Selection              | Geometry geom1: Dimension 2: Domains 1-2 |

### EQUATIONS

$$\frac{\partial c_i}{\partial t} + \nabla \cdot \mathbf{J}_i = R_i$$
$$\mathbf{J}_i = -D_i \nabla c_i$$

## 2.3.1 Interface Settings

### Discretization

#### SETTINGS

| Description   | Value  |
|---------------|--------|
| Concentration | Linear |

### Transport Mechanisms

#### SETTINGS

| Description                   | Value |
|-------------------------------|-------|
| Convection                    | Off   |
| Migration in electric field   | Off   |
| Mass transfer in porous media | Off   |

## 2.3.2 Variables

| Name        | Expression | Unit                    | Description                                         | Selection      | Details     |
|-------------|------------|-------------------------|-----------------------------------------------------|----------------|-------------|
| tds.R_cOx   | 0          | mol/(m <sup>3</sup> ·s) | Total rate expression                               | Domains 1–2    | + operation |
| tds.cP_cOx  | 0          | mol/kg                  | Concentration species absorbed to the solid         | Domains 1–2    | + operation |
| tds.cP_cOx  | 0          | mol/kg                  | Concentration species absorbed to the solid         | Boundaries 1–7 | + operation |
| tds.KP_cOx  | 0          | m <sup>3</sup> /kg      | Adsorption isotherm, first concentration derivative | Domains 1–2    | + operation |
| tds.KP_cOx  | 0          | m <sup>3</sup> /kg      | Adsorption isotherm, first concentration derivative | Boundaries 1–7 | + operation |
| tds.R_cRed  | 0          | mol/(m <sup>3</sup> ·s) | Total rate expression                               | Domains 1–2    | + operation |
| tds.cP_cRed | 0          | mol/kg                  | Concentration species absorbed to the solid         | Domains 1–2    | + operation |
| tds.cP_cRed | 0          | mol/kg                  | Concentration species absorbed to the solid         | Boundaries 1–7 | + operation |
| tds.KP_cRed | 0          | m <sup>3</sup> /kg      | Adsorption isotherm, first                          | Domains 1–2    | + operation |



| Name         | Expression         | Unit               | Description                                         | Selection           | Details     |
|--------------|--------------------|--------------------|-----------------------------------------------------|---------------------|-------------|
|              |                    |                    | concentration derivative                            |                     |             |
| tds.KP_cRed  | 0                  | m <sup>3</sup> /kg | Adsorption isotherm, first concentration derivative | Boundaries 1–7      | + operation |
| tds.poro     | 1                  | 1                  | Porosity                                            | Domains 1–2         |             |
| tds.theta_g  | 0                  | 1                  | Gas volume fraction                                 | Domains 1–2         |             |
| tds.theta    | tds.poro           | 1                  | Mobile fluid volume fraction                        | Domains 1–2         |             |
| tds.nr       | nr                 | 1                  | Normal vector, r component                          | Boundary 5          |             |
| tds.nphi     | 0                  | 1                  | Normal vector, phi component                        | Boundary 5          |             |
| tds.nz       | nz                 | 1                  | Normal vector, z component                          | Boundary 5          |             |
| tds.nr       | dnr                | 1                  | Normal vector, r component                          | Boundaries 1–4, 6–7 |             |
| tds.nphi     | 0                  | 1                  | Normal vector, phi component                        | Boundaries 1–4, 6–7 |             |
| tds.nz       | dnz                | 1                  | Normal vector, z component                          | Boundaries 1–4, 6–7 |             |
| tds.nrmesh   | nrmesh             | 1                  | Normal vector (mesh), r component                   | Boundary 5          |             |
| tds.nphimesh | 0                  | 1                  | Normal vector (mesh), phi component                 | Boundary 5          |             |
| tds.nzmesh   | nzmesh             | 1                  | Normal vector (mesh), z component                   | Boundary 5          |             |
| tds.nrmesh   | dnrmesh            | 1                  | Normal vector (mesh), r component                   | Boundaries 1–4, 6–7 |             |
| tds.nphimesh | 0                  | 1                  | Normal vector (mesh), phi component                 | Boundaries 1–4, 6–7 |             |
| tds.nzmesh   | dnzmesh            | 1                  | Normal vector (mesh), z component                   | Boundaries 1–4, 6–7 |             |
| tds.nrc      | root.nrc/tds.ncLen | 1                  | Normal vector, r                                    | Boundaries 1–       |             |

| Name      | Expression                      | Unit | Description                  | Selection      | Details |
|-----------|---------------------------------|------|------------------------------|----------------|---------|
|           |                                 |      | component                    | 7              |         |
| tds.nphic | 0                               | 1    | Normal vector, phi component | Boundaries 1–7 |         |
| tds.nzc   | root.nzc/tds.ncLen              | 1    | Normal vector, z component   | Boundaries 1–7 |         |
| tds.ncLen | sqrt(root.nrc^2+root.nzc^2+eps) | 1    | Help variable                | Boundaries 1–7 |         |

### 2.3.3 Transport Properties 1



*Transport Properties 1*

#### SELECTION

|                        |                                          |
|------------------------|------------------------------------------|
| Geometric entity level | Domain                                   |
| Selection              | Geometry geom1: Dimension 2: All domains |

#### EQUATIONS

$$\frac{\partial c_i}{\partial t} + \nabla \cdot \mathbf{J}_i = R_i$$

$$\mathbf{J}_i = -D_i \nabla c_i$$

#### Diffusion

##### SETTINGS

| Description | Value    |
|-------------|----------|
| Source      | Material |
| Material    | None     |

| Description           | Value                                      |
|-----------------------|--------------------------------------------|
| Diffusion coefficient | User defined                               |
| Diffusion coefficient | {{Dox, 0, 0}, {0, Dox, 0}, {0, 0, Dox}}    |
| Diffusion coefficient | User defined                               |
| Diffusion coefficient | {{Dred, 0, 0}, {0, Dred, 0}, {0, 0, Dred}} |

## Coordinate System Selection

### SETTINGS

| Description       | Value                    |
|-------------------|--------------------------|
| Coordinate system | Global coordinate system |

## Model Input

### SETTINGS

| Description | Value        |
|-------------|--------------|
| Temperature | User defined |
| Temperature | T            |

## Variables

| Name            | Expression                       | Unit                    | Description                         | Selection         | Details |
|-----------------|----------------------------------|-------------------------|-------------------------------------|-------------------|---------|
| domflux.cOxr    | $2 * tds.dflux\_cOxr * \pi * r$  | mol/(m·s)               | Domain flux, r component            | Domains 1–2       |         |
| domflux.cOxz    | $2 * tds.dflux\_cOxz * \pi * r$  | mol/(m·s)               | Domain flux, z component            | Domains 1–2       |         |
| domflux.cRedr   | $2 * tds.dflux\_cRedr * \pi * r$ | mol/(m·s)               | Domain flux, r component            | Domains 1–2       |         |
| domflux.cRedz   | $2 * tds.dflux\_cRedz * \pi * r$ | mol/(m·s)               | Domain flux, z component            | Domains 1–2       |         |
| tds.ndflux_cOx  | tds.bndFlux_cOx                  | mol/(m <sup>2</sup> ·s) | Normal diffusive flux               | Boundaries 2, 4–7 |         |
| tds.ntflux_cOx  | tds.bndFlux_cOx                  | mol/(m <sup>2</sup> ·s) | Normal total flux                   | Boundaries 2, 4–7 |         |
| tds.ndflux_cRed | tds.bndFlux_cRed                 | mol/(m <sup>2</sup> ·s) | Normal diffusive flux               | Boundaries 2, 4–7 |         |
| tds.ntflux_cRed | tds.bndFlux_cRed                 | mol/(m <sup>2</sup> ·s) | Normal total flux                   | Boundaries 2, 4–7 |         |
| tds.D_cOxrr     | Dox                              | m <sup>2</sup> /s       | Diffusion coefficient, rr component | Domains 1–2       |         |
| tds.D_cOxphir   | 0                                | m <sup>2</sup> /s       | Diffusion coefficient, phir         | Domains 1–2       |         |

| Name               | Expression | Unit              | Description                              | Selection   | Details |
|--------------------|------------|-------------------|------------------------------------------|-------------|---------|
|                    |            |                   | component                                |             |         |
| tds.D_cOx zr       | 0          | m <sup>2</sup> /s | Diffusion coefficient, zr component      | Domains 1–2 |         |
| tds.D_cOxr phi     | 0          | m <sup>2</sup> /s | Diffusion coefficient, rphi component    | Domains 1–2 |         |
| tds.D_cOx phi phi  | Dox        | m <sup>2</sup> /s | Diffusion coefficient, phi phi component | Domains 1–2 |         |
| tds.D_cOx z phi    | 0          | m <sup>2</sup> /s | Diffusion coefficient, zphi component    | Domains 1–2 |         |
| tds.D_cOx rz       | 0          | m <sup>2</sup> /s | Diffusion coefficient, rz component      | Domains 1–2 |         |
| tds.D_cOx phi z    | 0          | m <sup>2</sup> /s | Diffusion coefficient, phi z component   | Domains 1–2 |         |
| tds.D_cOx zz       | Dox        | m <sup>2</sup> /s | Diffusion coefficient, zz component      | Domains 1–2 |         |
| tds.D_cRed rr      | Dred       | m <sup>2</sup> /s | Diffusion coefficient, rr component      | Domains 1–2 |         |
| tds.D_cRed phi r   | 0          | m <sup>2</sup> /s | Diffusion coefficient, phi r component   | Domains 1–2 |         |
| tds.D_cRed zr      | 0          | m <sup>2</sup> /s | Diffusion coefficient, zr component      | Domains 1–2 |         |
| tds.D_cRed r phi   | 0          | m <sup>2</sup> /s | Diffusion coefficient, rphi component    | Domains 1–2 |         |
| tds.D_cRed phi phi | Dred       | m <sup>2</sup> /s | Diffusion coefficient, phi phi component | Domains 1–2 |         |
| tds.D_cRed z phi   | 0          | m <sup>2</sup> /s | Diffusion coefficient, zphi component    | Domains 1–2 |         |
| tds.D_cRed rz      | 0          | m <sup>2</sup> /s | Diffusion                                | Domains 1–2 |         |

| Name              | Expression                                                                                        | Unit                    | Description                           | Selection   | Details     |
|-------------------|---------------------------------------------------------------------------------------------------|-------------------------|---------------------------------------|-------------|-------------|
|                   |                                                                                                   |                         | coefficient, rz component             |             |             |
| tds.D_cRedphiz    | 0                                                                                                 | m <sup>2</sup> /s       | Diffusion coefficient, phiz component | Domains 1–2 |             |
| tds.D_cRedzz      | Dred                                                                                              | m <sup>2</sup> /s       | Diffusion coefficient, zz component   | Domains 1–2 |             |
| tds.Dav_cOx       | 0.5*(tds.D_cOxrr+tds.D_cOxzz)                                                                     | m <sup>2</sup> /s       | Average diffusion coefficient         | Domains 1–2 |             |
| tds.Dav_cRed      | 0.5*(tds.D_cRedrr+tds.D_cRedzz)                                                                   | m <sup>2</sup> /s       | Average diffusion coefficient         | Domains 1–2 |             |
| tds.tflux_cOxr    | tds.dflux_cOxr                                                                                    | mol/(m <sup>2</sup> ·s) | Total flux, r component               | Domains 1–2 | + operation |
| tds.tflux_cOxphi  | tds.dflux_cOxphi                                                                                  | mol/(m <sup>2</sup> ·s) | Total flux, phi component             | Domains 1–2 | + operation |
| tds.tflux_cOxz    | tds.dflux_cOxz                                                                                    | mol/(m <sup>2</sup> ·s) | Total flux, z component               | Domains 1–2 | + operation |
| tds.dfluxMag_cOx  | sqrt(tds.dflux_cOxr <sup>2</sup> +tds.dflux_cOxphi <sup>2</sup> +tds.dflux_cOxz <sup>2</sup> )    | mol/(m <sup>2</sup> ·s) | Diffusive flux magnitude              | Domains 1–2 |             |
| tds.tfluxMag_cOx  | sqrt(tds.tflux_cOxr <sup>2</sup> +tds.tflux_cOxphi <sup>2</sup> +tds.tflux_cOxz <sup>2</sup> )    | mol/(m <sup>2</sup> ·s) | Total flux magnitude                  | Domains 1–2 |             |
| tds.dpflux_cOxr   | 0                                                                                                 | mol/(m <sup>2</sup> ·s) | Dispersive flux, r component          | Domains 1–2 |             |
| tds.dpflux_cOxphi | 0                                                                                                 | mol/(m <sup>2</sup> ·s) | Dispersive flux, phi component        | Domains 1–2 |             |
| tds.dpflux_cOxz   | 0                                                                                                 | mol/(m <sup>2</sup> ·s) | Dispersive flux, z component          | Domains 1–2 |             |
| tds.tflux_cRedr   | tds.dflux_cRedr                                                                                   | mol/(m <sup>2</sup> ·s) | Total flux, r component               | Domains 1–2 | + operation |
| tds.tflux_cRedphi | tds.dflux_cRedphi                                                                                 | mol/(m <sup>2</sup> ·s) | Total flux, phi component             | Domains 1–2 | + operation |
| tds.tflux_cRedz   | tds.dflux_cRedz                                                                                   | mol/(m <sup>2</sup> ·s) | Total flux, z component               | Domains 1–2 | + operation |
| tds.dfluxMag_cRed | sqrt(tds.dflux_cRedr <sup>2</sup> +tds.dflux_cRedphi <sup>2</sup> +tds.dflux_cRedz <sup>2</sup> ) | mol/(m <sup>2</sup> ·s) | Diffusive flux magnitude              | Domains 1–2 |             |
| tds.tfluxMag_cRed | sqrt(tds.tflux_cRedr <sup>2</sup> +tds.tflux_cRedphi <sup>2</sup> +tds.tflux_cRedz <sup>2</sup> ) | mol/(m <sup>2</sup> ·s) | Total flux                            | Domains 1–2 |             |

| Name               | Expression                                                                                                                                                                                                                                                                                                                                                                                                                        | Unit                                  | Description                                          | Selection   | Details |
|--------------------|-----------------------------------------------------------------------------------------------------------------------------------------------------------------------------------------------------------------------------------------------------------------------------------------------------------------------------------------------------------------------------------------------------------------------------------|---------------------------------------|------------------------------------------------------|-------------|---------|
| d                  | $\sqrt{2 + \text{tds.tflux\_cRedp}^2 + \text{tds.tflux\_cRed}^2}$                                                                                                                                                                                                                                                                                                                                                                 |                                       | magnitude                                            |             |         |
| tds.dpflux_cRedr   | 0                                                                                                                                                                                                                                                                                                                                                                                                                                 | mol/(m <sup>2</sup> .s)               | Dispersive flux, r component                         | Domains 1–2 |         |
| tds.dpflux_cRedphi | 0                                                                                                                                                                                                                                                                                                                                                                                                                                 | mol/(m <sup>2</sup> .s)               | Dispersive flux, phi component                       | Domains 1–2 |         |
| tds.dpflux_cRedz   | 0                                                                                                                                                                                                                                                                                                                                                                                                                                 | mol/(m <sup>2</sup> .s)               | Dispersive flux, z component                         | Domains 1–2 |         |
| cOxrt              | $\frac{d}{dt}(\text{cOxrTIME} - \text{cOxrr} \cdot d(r, \text{TIME}) - \text{cOxrz} \cdot d(z, \text{TIME}))$                                                                                                                                                                                                                                                                                                                     | mol/(m <sup>4</sup> .s)               | Gradient of cOx, r component, first time derivative  | Domains 1–2 |         |
| cOxzt              | $\frac{d}{dt}(\text{cOxzTIME} - \text{cOx zr} \cdot d(r, \text{TIME}) - \text{cOx zz} \cdot d(z, \text{TIME}))$                                                                                                                                                                                                                                                                                                                   | mol/(m <sup>4</sup> .s)               | Gradient of cOx, z component, first time derivative  | Domains 1–2 |         |
| cOxr tt            | $\frac{d}{dt}(\frac{d}{dt}(\text{cOxrTIME} - \text{cOx rr} \cdot d(r, \text{TIME}) - \text{cOx rz} \cdot d(z, \text{TIME})), \text{TIME}) - \frac{d}{dt}(\text{cOxrTIME} - \text{cOx rr} \cdot d(r, \text{TIME}) - \text{cOx rz} \cdot d(z, \text{TIME}), r) \cdot d(r, \text{TIME}) - \frac{d}{dt}(\text{cOxrTIME} - \text{cOx rr} \cdot d(r, \text{TIME}) - \text{cOx rz} \cdot d(z, \text{TIME}), z) \cdot d(z, \text{TIME}))$ | mol/(m <sup>4</sup> .s <sup>2</sup> ) | Gradient of cOx, r component, second time derivative | Domains 1–2 |         |
| cOxz tt            | $\frac{d}{dt}(\frac{d}{dt}(\text{cOxzTIME} - \text{cOx zr} \cdot d(r, \text{TIME}) - \text{cOx zz} \cdot d(z, \text{TIME})), \text{TIME}) - \frac{d}{dt}(\text{cOxzTIME} - \text{cOx zr} \cdot d(r, \text{TIME}) - \text{cOx zz} \cdot d(z, \text{TIME}), r) \cdot d(r, \text{TIME}) - \frac{d}{dt}(\text{cOxzTIME} - \text{cOx zr} \cdot d(r, \text{TIME}) - \text{cOx zz} \cdot d(z, \text{TIME}), z) \cdot d(z, \text{TIME}))$ | mol/(m <sup>4</sup> .s <sup>2</sup> ) | Gradient of cOx, z component, second time derivative | Domains 1–2 |         |
| cOxt               | $\frac{d}{dt}(\text{cOxTIME} - \text{cOxr} \cdot d(r, \text{TIME}) - \text{cOxz} \cdot d(z, \text{TIME}))$                                                                                                                                                                                                                                                                                                                        | mol/(m <sup>3</sup> .s)               | Concentration, first time derivative                 | Domains 1–2 |         |
| cOxtt              | $\frac{d}{dt}(\frac{d}{dt}(\text{cOxTIME} - \text{cOxr} \cdot d(r, \text{TIME}) - \text{cOxz} \cdot d(z, \text{TIME})), \text{TIME})$                                                                                                                                                                                                                                                                                             | mol/(m <sup>3</sup> .s <sup>2</sup> ) | Concentration, second time derivative                | Domains 1–2 |         |

| Name             | Expression                                                                                                                                                                  | Unit                                  | Description                                           | Selection   | Details |
|------------------|-----------------------------------------------------------------------------------------------------------------------------------------------------------------------------|---------------------------------------|-------------------------------------------------------|-------------|---------|
|                  | $)-d(cOxTIME-cOxr*d(r,TIME)-cOxz*d(z,TIME),r)*d(r,TIME)-d(cOxTIME-cOxr*d(r,TIME)-cOxz*d(z,TIME),z)*d(z,TIME)$                                                               |                                       |                                                       |             |         |
| tds.dflux_cOxr   | $-tds.D\_cOxr*cOxr-tds.D\_cOxrz*cOxz$                                                                                                                                       | mol/(m <sup>2</sup> .s)               | Diffusive flux, r component                           | Domains 1–2 |         |
| tds.dflux_cOxphi | $-tds.D\_cOxphir*cOxr-tds.D\_cOxphiz*cOxz$                                                                                                                                  | mol/(m <sup>2</sup> .s)               | Diffusive flux, phi component                         | Domains 1–2 |         |
| tds.dflux_cOxz   | $-tds.D\_cOx zr*cOxr-tds.D\_cOx zz*cOxz$                                                                                                                                    | mol/(m <sup>2</sup> .s)               | Diffusive flux, z component                           | Domains 1–2 |         |
| tds.grad_cOxr    | cOxr                                                                                                                                                                        | mol/m <sup>4</sup>                    | Concentration gradient, r component                   | Domains 1–2 |         |
| tds.grad_cOxphi  | 0                                                                                                                                                                           | mol/m <sup>4</sup>                    | Concentration gradient, phi component                 | Domains 1–2 |         |
| tds.grad_cOxz    | cOxz                                                                                                                                                                        | mol/m <sup>4</sup>                    | Concentration gradient, z component                   | Domains 1–2 |         |
| cRedrt           | $cRedrTIME-cRedrr*d(r,TIME)-cRedrz*d(z,TIME)$                                                                                                                               | mol/(m <sup>4</sup> .s)               | Gradient of cRed, r component, first time derivative  | Domains 1–2 |         |
| cRedzt           | $cRedzTIME-cRedzr*d(r,TIME)-cRedzz*d(z,TIME)$                                                                                                                               | mol/(m <sup>4</sup> .s)               | Gradient of cRed, z component, first time derivative  | Domains 1–2 |         |
| cRedrtt          | $d(cRedrTIME-cRedrr*d(r,TIME)-cRedrz*d(z,TIME),TIME)-d(cRedrTIME-cRedrr*d(r,TIME)-cRedrz*d(z,TIME),r)*d(r,TIME)-d(cRedrTIME-cRedrr*d(r,TIME)-cRedrz*d(z,TIME),z)*d(z,TIME)$ | mol/(m <sup>4</sup> .s <sup>2</sup> ) | Gradient of cRed, r component, second time derivative | Domains 1–2 |         |
| cRedztt          | $d(cRedzTIME-cRedzr*d(r,TIME)-$                                                                                                                                             | mol/(m <sup>4</sup> .s <sup>2</sup> ) | Gradient of cRed, z component,                        | Domains 1–2 |         |

| Name              | Expression                                                                                                                                                                                                                                                         | Unit                                  | Description                           | Selection     | Details |
|-------------------|--------------------------------------------------------------------------------------------------------------------------------------------------------------------------------------------------------------------------------------------------------------------|---------------------------------------|---------------------------------------|---------------|---------|
|                   | $cRedz \cdot d(z, TIME) - d(cRedz \cdot TIME - cRedz \cdot d(r, TIME) - cRedz \cdot d(z, TIME), r) \cdot d(r, TIME) - d(cRedz \cdot TIME - cRedz \cdot d(r, TIME) - cRedz \cdot d(z, TIME), z) \cdot d(z, TIME)$                                                   |                                       | second time derivative                |               |         |
| cRedt             | $cRed \cdot TIME - cRedr \cdot d(r, TIME) - cRedz \cdot d(z, TIME)$                                                                                                                                                                                                | mol/(m <sup>3</sup> ·s)               | Concentration, first time derivative  | Domains 1–2   |         |
| cRedtt            | $d(cRed \cdot TIME - cRedr \cdot d(r, TIME) - cRedz \cdot d(z, TIME), TIME) - d(cRed \cdot TIME - cRedr \cdot d(r, TIME) - cRedz \cdot d(z, TIME), r) \cdot d(r, TIME) - d(cRed \cdot TIME - cRedr \cdot d(r, TIME) - cRedz \cdot d(z, TIME), z) \cdot d(z, TIME)$ | mol/(m <sup>3</sup> ·s <sup>2</sup> ) | Concentration, second time derivative | Domains 1–2   |         |
| tds.dflux_cRedr   | $- tds.D\_cRedr \cdot cRedr - tds.D\_cRedz \cdot cRedz$                                                                                                                                                                                                            | mol/(m <sup>2</sup> ·s)               | Diffusive flux, r component           | Domains 1–2   |         |
| tds.dflux_cRedphi | $- tds.D\_cRedphi \cdot cRedr - tds.D\_cRedz \cdot cRedz$                                                                                                                                                                                                          | mol/(m <sup>2</sup> ·s)               | Diffusive flux, phi component         | Domains 1–2   |         |
| tds.dflux_cRedz   | $- tds.D\_cRedz \cdot cRedr - tds.D\_cRedz \cdot cRedz$                                                                                                                                                                                                            | mol/(m <sup>2</sup> ·s)               | Diffusive flux, z component           | Domains 1–2   |         |
| tds.grad_cRedr    | cRedr                                                                                                                                                                                                                                                              | mol/m <sup>4</sup>                    | Concentration gradient, r component   | Domains 1–2   |         |
| tds.grad_cRedphi  | 0                                                                                                                                                                                                                                                                  | mol/m <sup>4</sup>                    | Concentration gradient, phi component | Domains 1–2   |         |
| tds.grad_cRedz    | cRedz                                                                                                                                                                                                                                                              | mol/m <sup>4</sup>                    | Concentration gradient, z component   | Domains 1–2   |         |
| tds.bndFlux_cOx   | if(r>0.001/sqrt(sqrt(                                                                                                                                                                                                                                              | mol/(m <sup>2</sup> ·s)               | Boundary flux                         | Boundaries 1– |         |



| Name             | Expression                                                                                                                                                                        | Unit                                   | Description       | Selection           | Details |
|------------------|-----------------------------------------------------------------------------------------------------------------------------------------------------------------------------------|----------------------------------------|-------------------|---------------------|---------|
|                  | $\text{mean}(\text{emetric}2)),-0.5*\text{dflux\_spatial}(\text{cOx})/(\text{pi}*r),\text{NaN})$                                                                                  |                                        |                   | 4, 6–7              |         |
| tds.bndFlux_cOx  | $\text{if}(r>0.001/\text{sqrt}(\text{sqrt}(\text{mean}(\text{emetric}2))),0.25*(\text{uflux\_spatial}(\text{cOx})-\text{dflux\_spatial}(\text{cOx}))/(\text{pi}*r),\text{NaN})$   | $\text{mol}/(\text{m}^2\cdot\text{s})$ | Boundary flux     | Boundary 5          |         |
| tds.bndFlux_cRed | $\text{if}(r>0.001/\text{sqrt}(\text{sqrt}(\text{mean}(\text{emetric}2))),-0.5*\text{dflux\_spatial}(\text{cRed})/(\text{pi}*r),\text{NaN})$                                      | $\text{mol}/(\text{m}^2\cdot\text{s})$ | Boundary flux     | Boundaries 1–4, 6–7 |         |
| tds.bndFlux_cRed | $\text{if}(r>0.001/\text{sqrt}(\text{sqrt}(\text{mean}(\text{emetric}2))),0.25*(\text{uflux\_spatial}(\text{cRed})-\text{dflux\_spatial}(\text{cRed}))/(\text{pi}*r),\text{NaN})$ | $\text{mol}/(\text{m}^2\cdot\text{s})$ | Boundary flux     | Boundary 5          |         |
| tds.Res_cOx      | $\text{d}(\text{cOx},\text{TIME})-\text{d}(\text{cOx},r)*\text{d}(r,\text{TIME})-\text{d}(\text{cOx},z)*\text{d}(z,\text{TIME})-\text{tds.R\_cOx}$                                | $\text{mol}/(\text{m}^3\cdot\text{s})$ | Equation residual | Domains 1–2         |         |
| tds.Res_cRed     | $\text{d}(\text{cRed},\text{TIME})-\text{d}(\text{cRed},r)*\text{d}(r,\text{TIME})-\text{d}(\text{cRed},z)*\text{d}(z,\text{TIME})-\text{tds.R\_cRed}$                            | $\text{mol}/(\text{m}^3\cdot\text{s})$ | Equation residual | Domains 1–2         |         |

### Shape functions

| Name | Shape function    | Unit                    | Description   | Shape frame | Selection   |
|------|-------------------|-------------------------|---------------|-------------|-------------|
| cOx  | Lagrange (Linear) | $\text{mol}/\text{m}^3$ | Concentration | Spatial     | Domains 1–2 |
| cRed | Lagrange (Linear) | $\text{mol}/\text{m}^3$ | Concentration | Spatial     | Domains 1–2 |

### Weak Expressions

| Weak expression                                                                                                                                                                                                                      | Integration order | Integration frame | Selection   |
|--------------------------------------------------------------------------------------------------------------------------------------------------------------------------------------------------------------------------------------|-------------------|-------------------|-------------|
| $2*(-(\text{cOx}\text{TIME}-\text{cOxr}*d(r,\text{TIME})-\text{cOxz}*d(z,\text{TIME}))*\text{test}(\text{cOx})+\text{tds.dflux\_cOxr}*\text{test}(\text{cOxr})+\text{tds.dflux\_cOxz}*\text{test}(\text{cOxz}))*\text{pi}*r$         | 2                 | Spatial           | Domains 1–2 |
| $2*(-(\text{cRed}\text{TIME}-\text{cRedr}*d(r,\text{TIME})-\text{cRedz}*d(z,\text{TIME}))*\text{test}(\text{cRed})+\text{tds.dflux\_cRedr}*\text{test}(\text{cRedr})+\text{tds.dflux\_cRedz}*\text{test}(\text{cRedz}))*\text{pi}*r$ | 2                 | Spatial           | Domains 1–2 |

| Weak expression                                                                   | Integration order | Integration frame | Selection   |
|-----------------------------------------------------------------------------------|-------------------|-------------------|-------------|
| $2 \cdot \text{tds.streamline}(\text{isScalingSystemDmain}==0) \cdot \pi \cdot r$ | 2                 | Spatial           | Domains 1-2 |
| $2 \cdot \text{tds.crosswind}(\text{isScalingSystemDmain}==0) \cdot \pi \cdot r$  | 4                 | Spatial           | Domains 1-2 |

### 2.3.4 Axial Symmetry 1

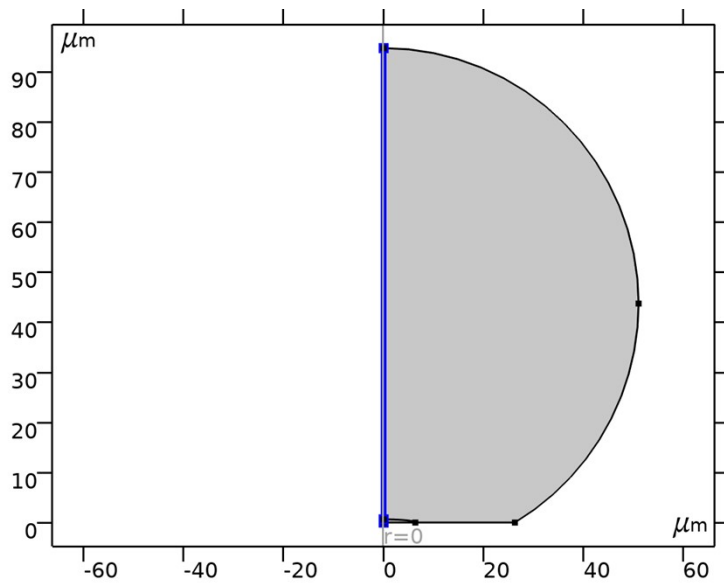

*Axial Symmetry 1*

#### SELECTION

|                        |                                             |
|------------------------|---------------------------------------------|
| Geometric entity level | Boundary                                    |
| Selection              | Geometry geom1: Dimension 1: All boundaries |

### 2.3.5 No Flux 1

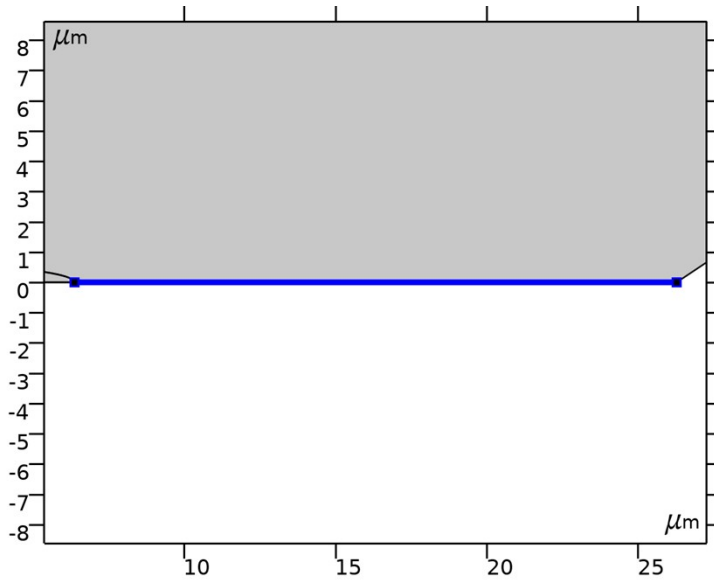

No Flux 1

#### SELECTION

|                        |                                             |
|------------------------|---------------------------------------------|
| Geometric entity level | Boundary                                    |
| Selection              | Geometry geom1: Dimension 1: All boundaries |

#### EQUATIONS

$$-\mathbf{n} \cdot \mathbf{J}_j = 0$$

### 2.3.6 Initial Values in DCE

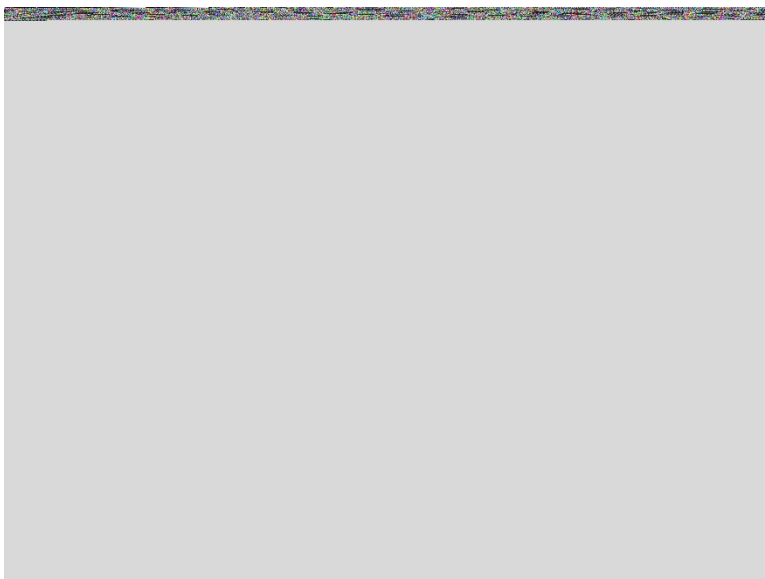

Initial Values in DCE

### SELECTION

|                        |                                          |
|------------------------|------------------------------------------|
| Geometric entity level | Domain                                   |
| Selection              | Geometry geom1: Dimension 2: All domains |

### Initial Values

#### SETTINGS

| Description   | Value                   |
|---------------|-------------------------|
| Concentration | {C0_ox_ini, C0_red_ini} |

## 2.3.7 Flux at electrode (E0 & ohm corrections)

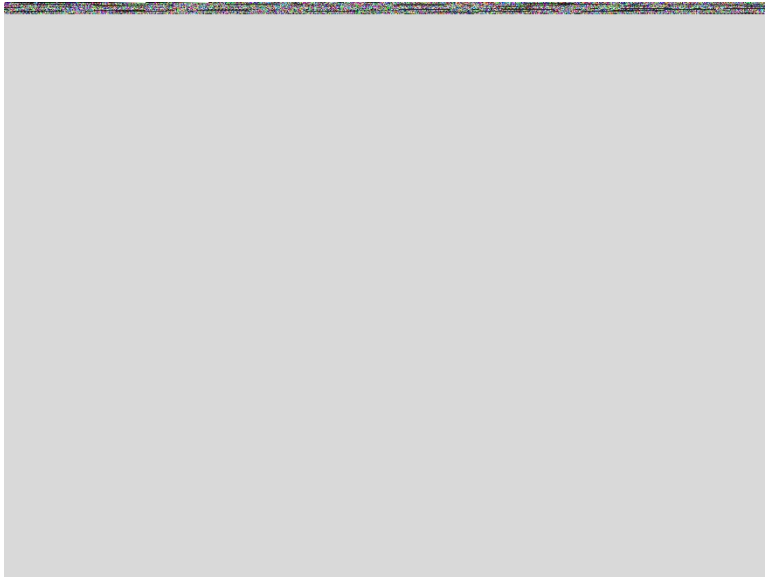

*Flux at electrode (E0 & ohm corrections)*

### SELECTION

|                        |                                         |
|------------------------|-----------------------------------------|
| Geometric entity level | Boundary                                |
| Selection              | Geometry geom1: Dimension 1: Boundary 2 |

### EQUATIONS

$$-\mathbf{n} \cdot \mathbf{J}_i = j_{0i}$$

### Inward Flux

#### SETTINGS

| Description  | Value               |
|--------------|---------------------|
| Flux type    | General inward flux |
| Species cOx  | On                  |
| Species cRed | On                  |

| Description | Value                                                                                                                                                                                                                                                                                               |
|-------------|-----------------------------------------------------------------------------------------------------------------------------------------------------------------------------------------------------------------------------------------------------------------------------------------------------|
|             | $\{(k_0 \exp((1 - \alpha) f(\text{pot}(t) - E_{0j} - DE))) c_{\text{Red}} - (k_0 \exp(-\alpha f(\text{pot}(t) - E_{0j} - DE))) c_{\text{Ox}}\}, -$<br>$(k_0 \exp((1 - \alpha) f(\text{pot}(t) - E_{0j} - DE))) c_{\text{Red}} - (k_0 \exp(-\alpha f(\text{pot}(t) - E_{0j} - DE))) c_{\text{Ox}}\}$ |

### Weak Expressions

| Weak expression                                                                                                                                                                        | Integration order | Integration frame | Selection  |
|----------------------------------------------------------------------------------------------------------------------------------------------------------------------------------------|-------------------|-------------------|------------|
| $2 * k_0 * (\exp((1 - \alpha) f(\text{pot}(t) - E_{0j} - DE))) c_{\text{Red}} - \exp(-\alpha f(\text{pot}(t) - E_{0j} - DE)) * c_{\text{Ox}} * \text{test}(c_{\text{Ox}}) * \pi * r$   | 2                 | Spatial           | Boundary 2 |
| $-2 * k_0 * (\exp((1 - \alpha) f(\text{pot}(t) - E_{0j} - DE))) c_{\text{Red}} - \exp(-\alpha f(\text{pot}(t) - E_{0j} - DE)) * c_{\text{Ox}} * \text{test}(c_{\text{Red}}) * \pi * r$ | 2                 | Spatial           | Boundary 2 |

### 2.3.8 Flux at o/w boundary

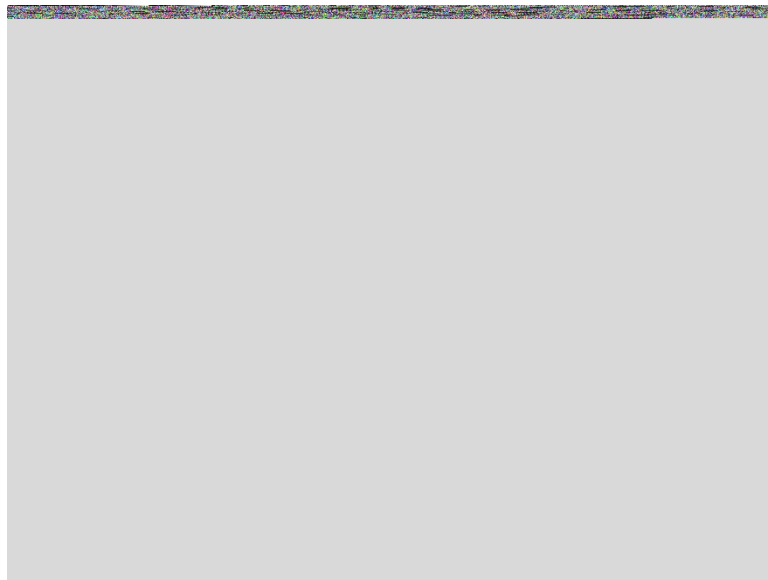

*Flux at o/w boundary*

#### SELECTION

|                        |                                             |
|------------------------|---------------------------------------------|
| Geometric entity level | Boundary                                    |
| Selection              | Geometry geom1: Dimension 1: Boundaries 6–7 |

#### EQUATIONS

$$-\mathbf{n} \cdot \mathbf{J}_i = J_{oi}$$

### Inward Flux

#### SETTINGS

| Description | Value               |
|-------------|---------------------|
| Flux type   | General inward flux |

| Description  | Value                                                                                                                                                                                   |
|--------------|-----------------------------------------------------------------------------------------------------------------------------------------------------------------------------------------|
| Species cOx  | On                                                                                                                                                                                      |
| Species cRed | On                                                                                                                                                                                      |
|              | {loss(t)* (if( r_c > 1.25*r_elec, -Vn(t), sqrt(Vr_CCR^2 + Vz_CCR^2) )*cOx) - kloss_ox*cOx, loss(t)* (if( r_c > 1.25*r_elec, -Vn(t), sqrt(Vr_CCR^2 + Vz_CCR^2) )*cRed) - kloss_red*cRed} |

### Weak Expressions

| Weak expression                                                                                      | Integration order | Integration frame | Selection      |
|------------------------------------------------------------------------------------------------------|-------------------|-------------------|----------------|
| $2*cOx*(loss(t)*if(r_c>1.25*r\_elec, -Vn(t),sqrt(Vr\_CCR^2+Vz\_CCR^2))-kloss\_ox)*test(cOx)*pi*r$    | 2                 | Spatial           | Boundaries 6–7 |
| $2*cRed*(loss(t)*if(r_c>1.25*r\_elec, -Vn(t),sqrt(Vr\_CCR^2+Vz\_CCR^2))-kloss\_red)*test(cRed)*pi*r$ | 2                 | Spatial           | Boundaries 6–7 |

## 2.4 MOVING MESH

### USED PRODUCTS

COMSOL Multiphysics

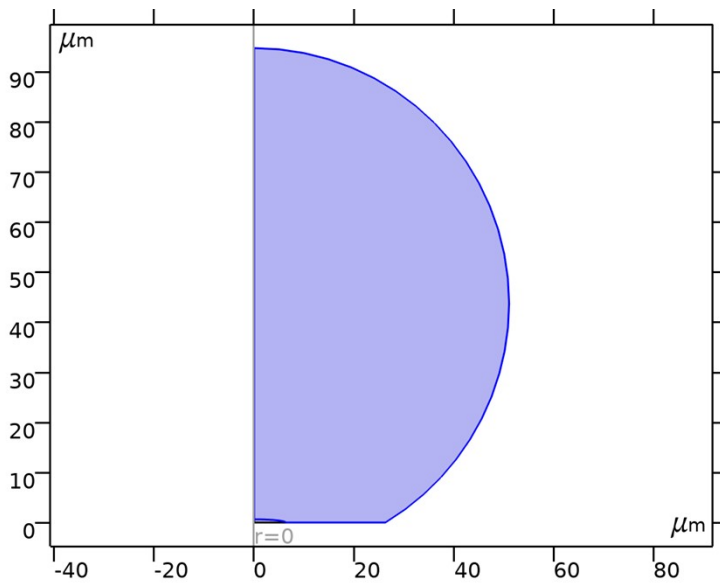

### Moving Mesh

### SELECTION

|                        |                                       |
|------------------------|---------------------------------------|
| Geometric entity level | Domain                                |
| Selection              | Geometry geom1: Dimension 2: Domain 2 |

## 2.4.1 Interface Settings

### Frame Settings

#### SETTINGS

| Description             | Value |
|-------------------------|-------|
| Geometry shape function | 1     |

### Legacy Functionality (Development Only)

#### SETTINGS

| Description                           | Value |
|---------------------------------------|-------|
| Use legacy moving frame functionality | Off   |

## 2.4.2 Variables

| Name         | Expression    | Unit | Description                         | Selection      | Details |
|--------------|---------------|------|-------------------------------------|----------------|---------|
| ale.nR       | nR            |      | Normal vector, R component          | Boundaries 3–7 | Meta    |
| ale.nPHI     | root.nPHI     |      | Normal vector, PHI component        | Boundaries 3–7 | Meta    |
| ale.nZ       | nZ            |      | Normal vector, Z component          | Boundaries 3–7 | Meta    |
| ale.nRmesh   | nRmesh        |      | Normal vector (mesh), R component   | Boundaries 3–7 | Meta    |
| ale.nPHImesh | root.nPHImesh |      | Normal vector (mesh), PHI component | Boundaries 3–7 | Meta    |
| ale.nZmesh   | nZmesh        |      | Normal vector (mesh), Z component   | Boundaries 3–7 | Meta    |
| ale.nr       | nr            |      | Normal vector, r component          | Boundaries 3–7 | Meta    |
| ale.nphi     | root.nphi     |      | Normal vector, phi component        | Boundaries 3–7 | Meta    |
| ale.nz       | nz            |      | Normal vector, z component          | Boundaries 3–7 | Meta    |
| ale.nrmesh   | nrmesh        |      | Normal vector (mesh), r component   | Boundaries 3–7 | Meta    |
| ale.nphimesh | root.nphimesh |      | Normal vector (mesh), phi           | Boundaries 3–7 | Meta    |

| Name          | Expression        | Unit | Description                          | Selection      | Details |
|---------------|-------------------|------|--------------------------------------|----------------|---------|
|               |                   |      | component                            |                |         |
| ale.nzmesh    | nzmesh            |      | Normal vector (mesh), z component    | Boundaries 3–7 | Meta    |
| ale.nRg       | nRg               |      | Normal vector, Rg component          | Boundaries 3–7 | Meta    |
| ale.nPHlg     | root.nPHlg        |      | Normal vector, PHlg component        | Boundaries 3–7 | Meta    |
| ale.nZg       | nZg               |      | Normal vector, Zg component          | Boundaries 3–7 | Meta    |
| ale.nRgmesh   | nRgmesh           |      | Normal vector (mesh), Rg component   | Boundaries 3–7 | Meta    |
| ale.nPHlgmesh | root.nPHlgmesh    |      | Normal vector (mesh), PHlg component | Boundaries 3–7 | Meta    |
| ale.nZgmesh   | nZgmesh           |      | Normal vector (mesh), Zg component   | Boundaries 3–7 | Meta    |
| ale.nRm       | nRm               |      | Normal vector, Rm component          | Boundaries 3–7 | Meta    |
| ale.nPHlm     | root.nPHlm        |      | Normal vector, PHlm component        | Boundaries 3–7 | Meta    |
| ale.nZm       | nZm               |      | Normal vector, Zm component          | Boundaries 3–7 | Meta    |
| ale.nRmmesh   | nRmmesh           |      | Normal vector (mesh), Rm component   | Boundaries 3–7 | Meta    |
| ale.nPHlmmesh | root.nPHlmmesh    |      | Normal vector (mesh), PHlm component | Boundaries 3–7 | Meta    |
| ale.nZmmesh   | nZmmesh           |      | Normal vector (mesh), Zm component   | Boundaries 3–7 | Meta    |
| ale.relVol    | spatial.relVol    | 1    | Local relative element volume        | Domain 2       |         |
| ale.relVolMin | spatial.relVolMin | 1    | Minimum relative                     | Global         |         |



| Name          | Expression        | Unit | Description                                     | Selection | Details |
|---------------|-------------------|------|-------------------------------------------------|-----------|---------|
|               |                   |      | element volume                                  |           |         |
| ale.relVolMax | spatial.relVolMax | 1    | Maximum relative element volume                 | Global    |         |
| ale.minqual   | spatial.minqual   |      | Minimum element quality                         | Global    |         |
| ale.I1iso     | spatial.I1iso     | 1    | First invariant of isochoric mesh strain tensor | Domain 2  |         |
| ale.I1isoMax  | spatial.I1isoMax  | 1    | Maximum element distortion                      | Global    |         |
| ale.J_mesh    | spatial.J_mesh    | 1    | Mesh deformation volume ratio                   | Domain 2  |         |
| rt            | d(r,TIME)         | m/s  | Mesh velocity, r component                      | Global    |         |
| phit          | 0                 | m/s  | Mesh velocity, phi component                    | Global    |         |
| zt            | d(z,TIME)         | m/s  | Mesh velocity, z component                      | Global    |         |

### 2.4.3 Fixed Mesh 1

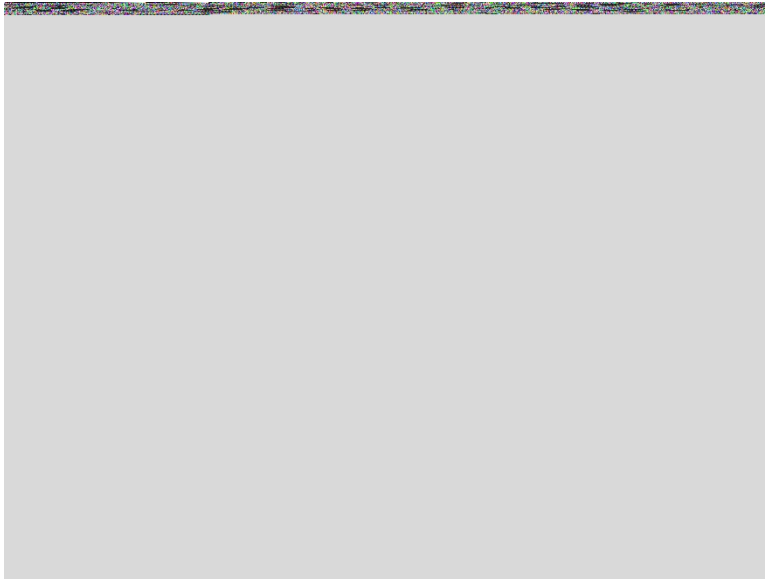

*Fixed Mesh 1*

#### SELECTION

|                        |                                          |
|------------------------|------------------------------------------|
| Geometric entity level | Domain                                   |
| Selection              | Geometry geom1: Dimension 2: All domains |

### 2.4.4 Prescribed Mesh Displacement 1

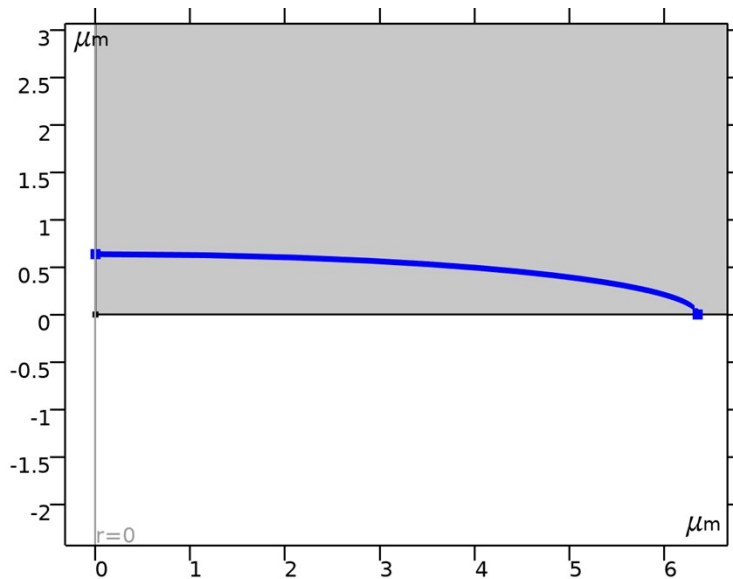

*Prescribed Mesh Displacement 1*

#### SELECTION

|                        |          |
|------------------------|----------|
| Geometric entity level | Boundary |
|------------------------|----------|

|           |                                             |
|-----------|---------------------------------------------|
| Selection | Geometry geom1: Dimension 1: All boundaries |
|-----------|---------------------------------------------|

#### SETTINGS

| Description                  | Value    |
|------------------------------|----------|
| Prescribed mesh displacement | {0, 0}   |
| Use weak constraints         | Off      |
| Prescribed # displacement    | {On, On} |

### Coordinate System Selection

#### SETTINGS

| Description       | Value                    |
|-------------------|--------------------------|
| Coordinate system | Global coordinate system |

## 2.4.5 Free Deformation 1

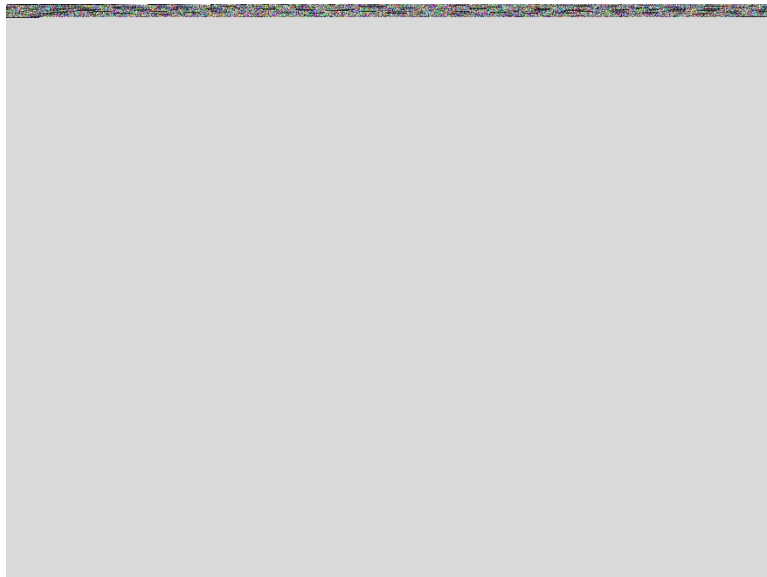

### *Free Deformation 1*

#### SELECTION

|                        |                                       |
|------------------------|---------------------------------------|
| Geometric entity level | Domain                                |
| Selection              | Geometry geom1: Dimension 2: Domain 2 |

#### SETTINGS

| Description               | Value  |
|---------------------------|--------|
| Initial mesh displacement | {0, 0} |

## 2.4.6 Zero Normal Mesh Displacement 1

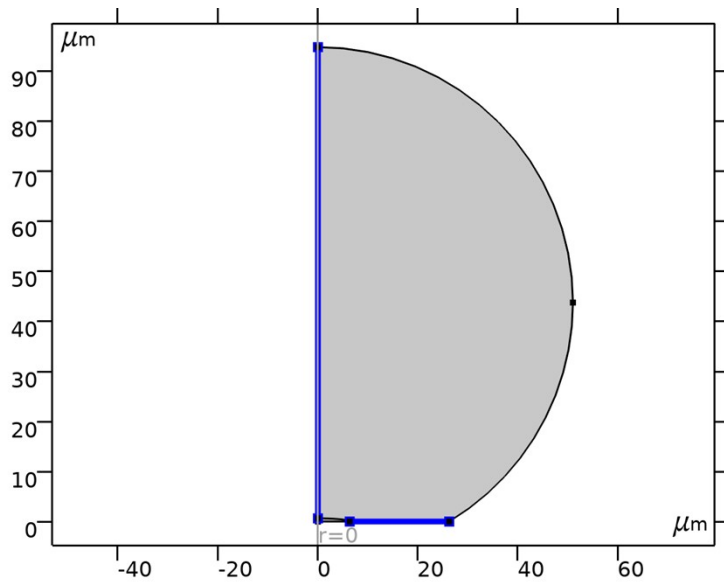

*Zero Normal Mesh Displacement 1*

### SELECTION

|                        |                                             |
|------------------------|---------------------------------------------|
| Geometric entity level | Boundary                                    |
| Selection              | Geometry geom1: Dimension 1: Boundaries 3–4 |

### EQUATIONS

$$\underline{(x - X) \cdot N = 0}$$

### SETTINGS

| Description          | Value |
|----------------------|-------|
| Use weak constraints | Off   |

## 2.4.7 Prescribed Mesh Velocity 1

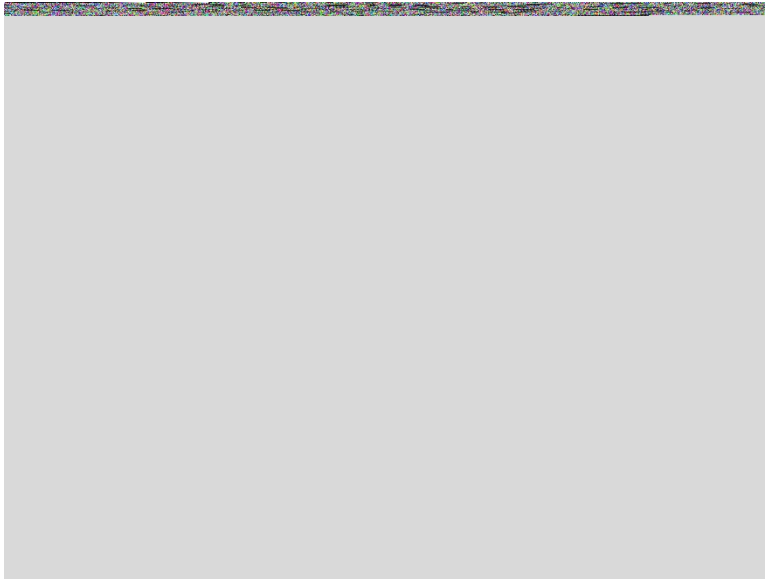

*Prescribed Mesh Velocity 1*

### SELECTION

|                        |                                             |
|------------------------|---------------------------------------------|
| Geometric entity level | Boundary                                    |
| Selection              | Geometry geom1: Dimension 1: Boundaries 6–7 |

### SETTINGS

| Description              | Value                                                                              |
|--------------------------|------------------------------------------------------------------------------------|
| Prescribed mesh velocity | {if( r_c > 1.25*r_elec, Vr_CCA, Vr_CCR ), if( r_c > 1.25*r_elec, Vz_CCA, Vz_CCR )} |
| Use weak constraints     | Off                                                                                |
| Prescribed # velocity    | {On, On}                                                                           |

### Coordinate System Selection

#### SETTINGS

| Description       | Value                    |
|-------------------|--------------------------|
| Coordinate system | Global coordinate system |

## 2.5 MESHES

### 2.5.1 Mesh 1

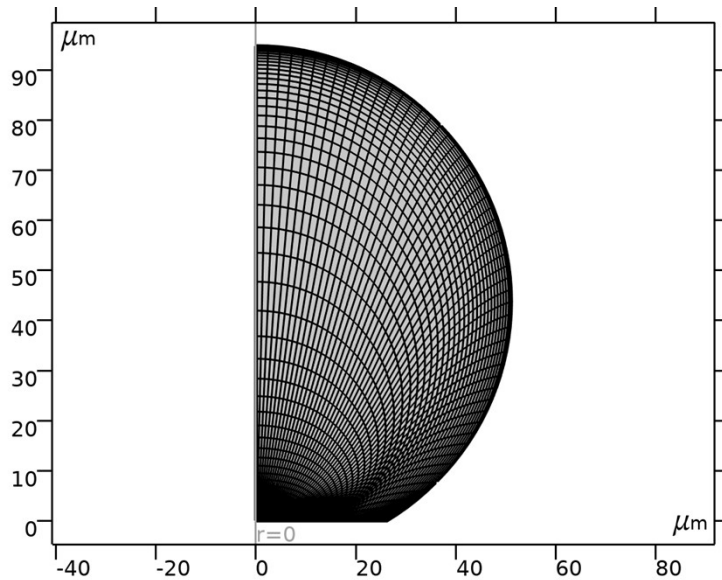

Mesh 1

#### MESH STATISTICS

| Description             | Value   |
|-------------------------|---------|
| Minimum element quality | 0.01292 |
| Average element quality | 0.423   |
| Triangle                | 534     |
| Quad                    | 2700    |
| Edge element            | 266     |
| Vertex element          | 6       |

#### Size (size)

##### SETTINGS

| Description                 | Value  |
|-----------------------------|--------|
| Maximum element size        | 6.35   |
| Minimum element size        | 0.0284 |
| Curvature factor            | 0.3    |
| Maximum element growth rate | 1.3    |

#### electrode (edg1)

##### SELECTION

|                        |          |
|------------------------|----------|
| Geometric entity level | Boundary |
|------------------------|----------|

|           |                                                |
|-----------|------------------------------------------------|
| Selection | Geometry geom1: Dimension 1: Boundaries 1-2, 5 |
|-----------|------------------------------------------------|

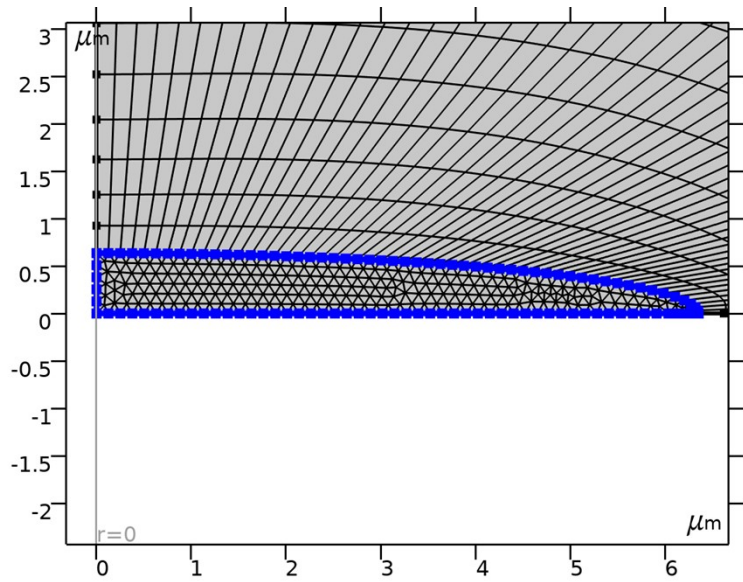

*electrode*

SETTINGS

| Description                      | Value |
|----------------------------------|-------|
| Number of iterations             | 4     |
| Maximum element depth to process | 4     |

Size 1 (size1)

SELECTION

|                        |                                                  |
|------------------------|--------------------------------------------------|
| Geometric entity level | Boundary                                         |
| Selection              | Geometry geom1: Dimension 1: Boundaries 1-2, 4-5 |

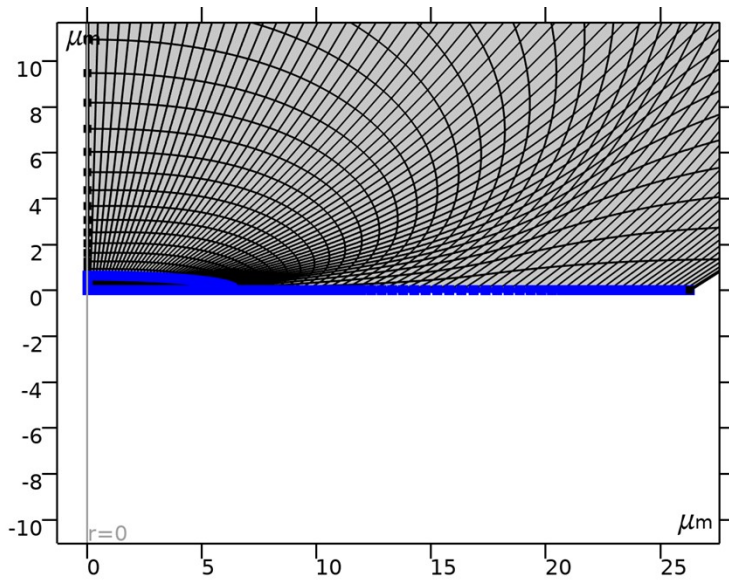

Size 1

#### SETTINGS

| Description                  | Value     |
|------------------------------|-----------|
| Maximum element size         | r_elec/50 |
| Minimum element size         | 2.27E-8   |
| Minimum element size         | Off       |
| Curvature factor             | 0.3       |
| Curvature factor             | Off       |
| Resolution of narrow regions | Off       |
| Maximum element growth rate  | 1.3       |
| Maximum element growth rate  | Off       |
| Custom element size          | Custom    |

#### diffusion layer (ftri1)

##### SELECTION

|                        |                                       |
|------------------------|---------------------------------------|
| Geometric entity level | Domain                                |
| Selection              | Geometry geom1: Dimension 2: Domain 1 |



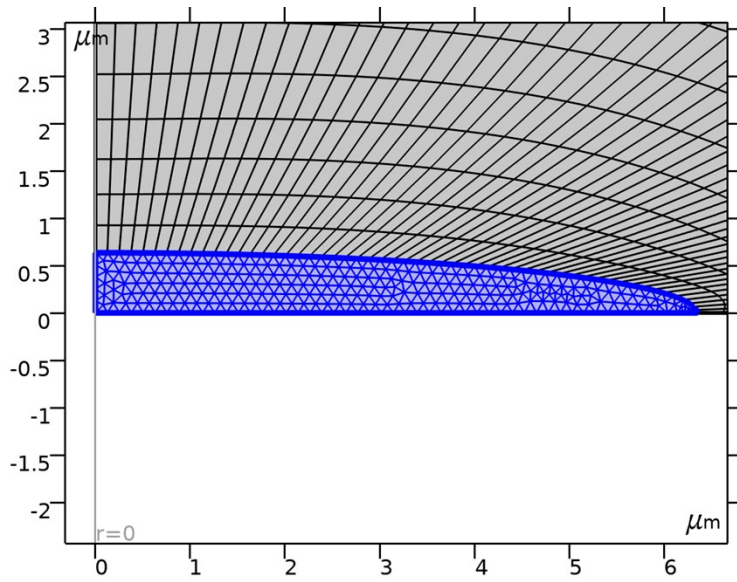

*diffusion layer*

SETTINGS

| Description                      | Value |
|----------------------------------|-------|
| Number of iterations             | 4     |
| Maximum element depth to process | 4     |

Size 1 (size1)

SELECTION

|                        |                                       |
|------------------------|---------------------------------------|
| Geometric entity level | Domain                                |
| Selection              | Geometry geom1: Dimension 2: Domain 1 |

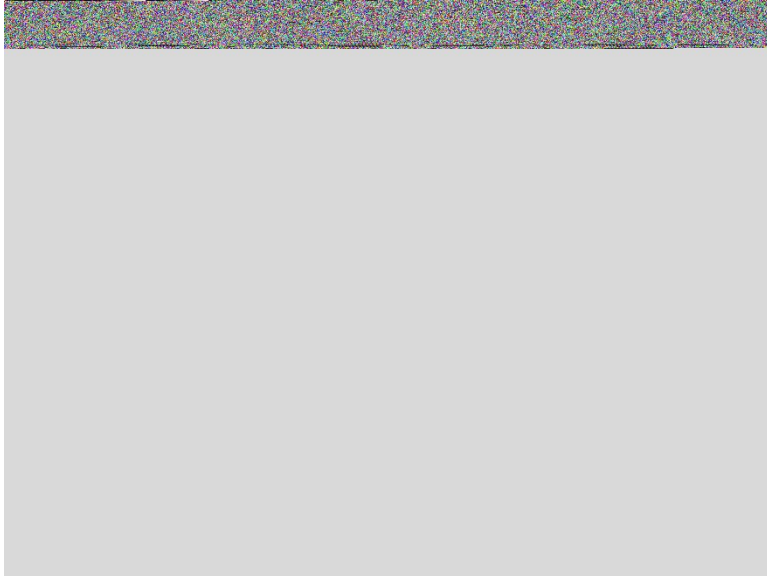

Size 1

#### SETTINGS

| Description          | Value         |
|----------------------|---------------|
| Calibrate for        | Semiconductor |
| Maximum element size | 0.189         |
| Minimum element size | 0.0379        |
| Curvature factor     | 0.25          |
| Predefined size      | Finer         |

#### revolution axis (edg2)

#### SELECTION

|                        |                                         |
|------------------------|-----------------------------------------|
| Geometric entity level | Boundary                                |
| Selection              | Geometry geom1: Dimension 1: Boundary 3 |

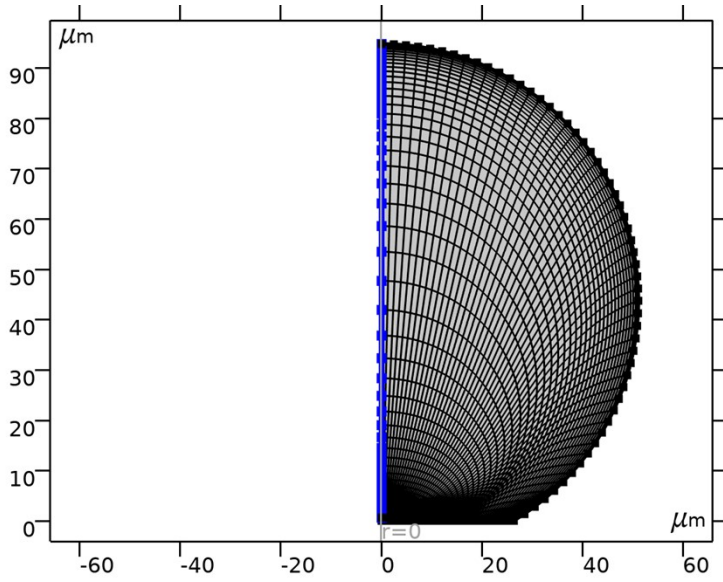

*revolution axis*

#### SETTINGS

| Description                      | Value |
|----------------------------------|-------|
| Number of iterations             | 4     |
| Maximum element depth to process | 4     |

#### Distribution 1 (dis1)

##### SELECTION

|                        |                                         |
|------------------------|-----------------------------------------|
| Geometric entity level | Boundary                                |
| Selection              | Geometry geom1: Dimension 1: Boundary 3 |

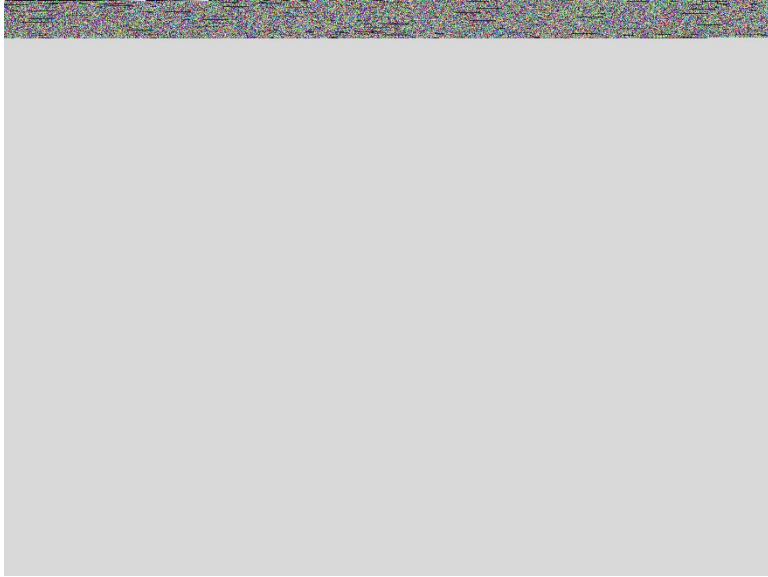

### *Distribution 1*

#### SETTINGS

| Description            | Value              |
|------------------------|--------------------|
| Distribution type      | Predefined         |
| Number of elements     | 50                 |
| Element ratio          | 20                 |
| Growth formula         | Geometric sequence |
| Symmetric distribution | On                 |

### **glass sheath (edg3)**

#### SELECTION

|                        |                                         |
|------------------------|-----------------------------------------|
| Geometric entity level | Boundary                                |
| Selection              | Geometry geom1: Dimension 1: Boundary 4 |

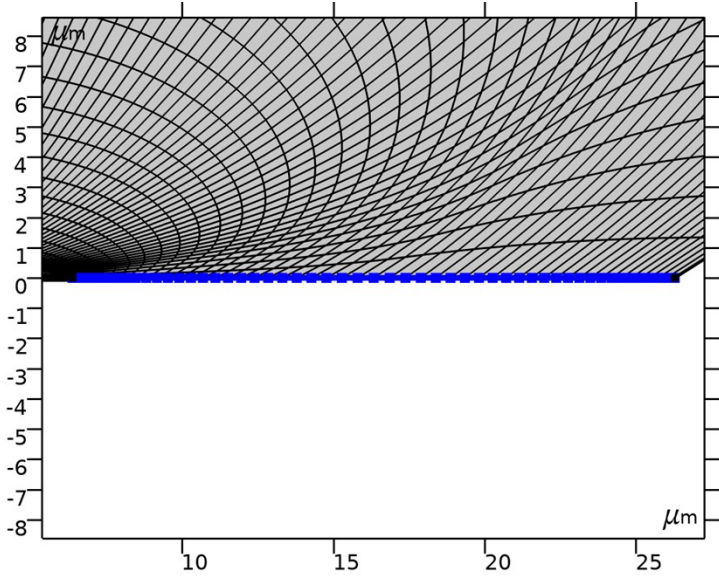

*glass sheath*

SETTINGS

| Description                      | Value |
|----------------------------------|-------|
| Number of iterations             | 4     |
| Maximum element depth to process | 4     |

**Distribution 1 (dis1)**

SELECTION

|                        |                                         |
|------------------------|-----------------------------------------|
| Geometric entity level | Boundary                                |
| Selection              | Geometry geom1: Dimension 1: Boundary 4 |

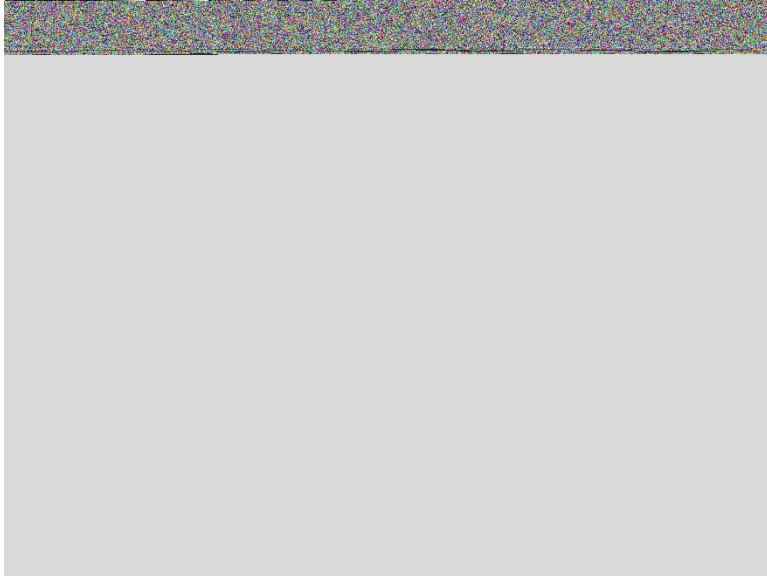

### *Distribution 1*

#### SETTINGS

| Description            | Value      |
|------------------------|------------|
| Distribution type      | Predefined |
| Number of elements     | 50         |
| Element ratio          | 2          |
| Symmetric distribution | On         |

### **Mapped 1 (map1)**

#### SELECTION

|                        |                                       |
|------------------------|---------------------------------------|
| Geometric entity level | Domain                                |
| Selection              | Geometry geom1: Dimension 2: Domain 2 |

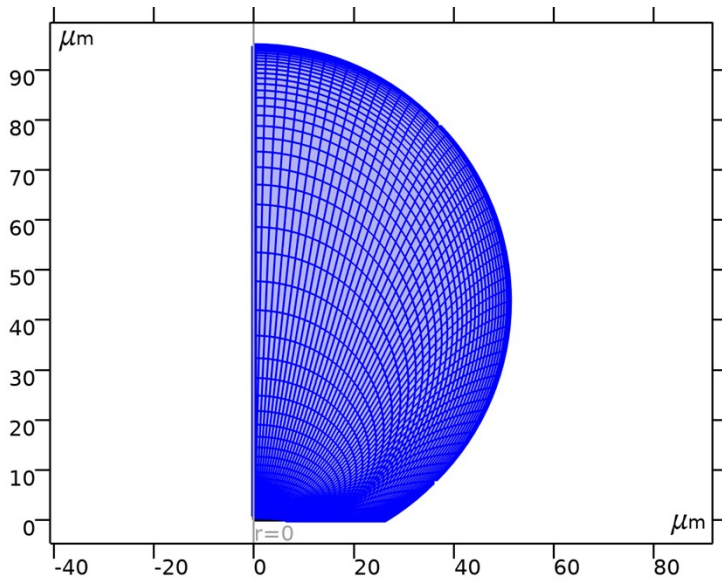

*Mapped 1*

SETTINGS

| Description                      | Value |
|----------------------------------|-------|
| Number of iterations             | 4     |
| Maximum element depth to process | 4     |

**2.5.2 Problematic Deformed Mesh 1**

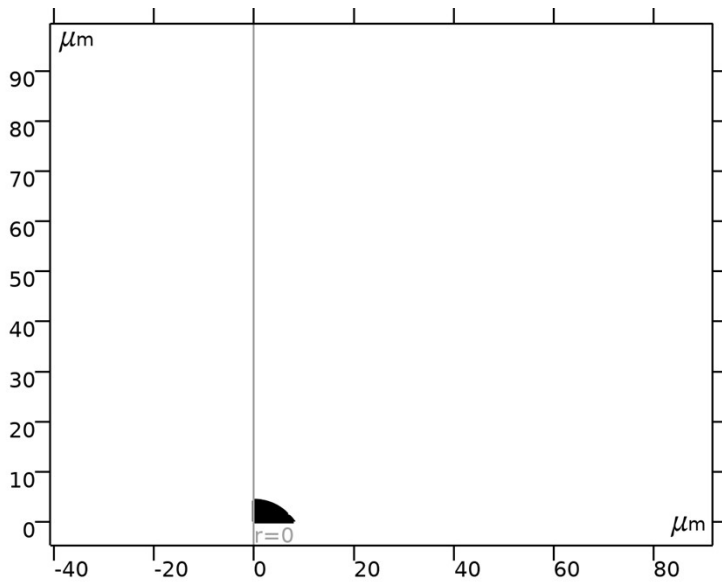

*Problematic Deformed Mesh 1*

MESH STATISTICS

| Description | Value |
|-------------|-------|
|-------------|-------|

| <b>Description</b>      | <b>Value</b> |
|-------------------------|--------------|
| Minimum element quality | -0.08319     |
| Average element quality | 0.5246       |
| Triangle                | 534          |
| Quad                    | 2700         |
| Edge element            | 266          |
| Vertex element          | 6            |



### 3 Study 1 (CV 1 to 39)

#### COMPUTATION INFORMATION

|                  |             |
|------------------|-------------|
| Computation time | 23 min 33 s |
|------------------|-------------|

#### 3.1 TIME DEPENDENT

| Times                              | Unit |
|------------------------------------|------|
| range(0*t_cv,t_tot/nb/200,39*t_cv) | s    |

#### STUDY SETTINGS

| Description                    | Value |
|--------------------------------|-------|
| Include geometric nonlinearity | Off   |

#### STUDY SETTINGS

#### MESH

| Feature    | Value |
|------------|-------|
| Geometry 1 | mesh1 |

#### PHYSICS AND VARIABLES SELECTION

| Physics interface                             | Discretization |
|-----------------------------------------------|----------------|
| Transport of Diluted Species in droplet (tds) | physics        |
| Moving Mesh (ale)                             | physics        |

#### MESH SELECTION

| Geometry           | Mesh  |
|--------------------|-------|
| Geometry 1 (geom1) | mesh1 |

### 3.2 SOLVER CONFIGURATIONS

#### 3.2.1 Solution 1

##### Compile Equations: Time Dependent (st1)

#### STUDY AND STEP

| Description    | Value                                |
|----------------|--------------------------------------|
| Use study      | <a href="#">Study 1 (CV 1 to 39)</a> |
| Use study step | <a href="#">Time Dependent</a>       |

#### LOG

```

<---- Compile Equations: Time Dependent in Study 1 (CV 1 to 39)/Solution 1
(sol2) -----
Started at Jun 15, 2023 6:33:18 PM.
Geometry shape function: Linear Lagrange
Running on Intel64 Family 6 Model 158 Stepping 10, GenuineIntel.
Using 1 socket with 6 cores in total on LAPTOP-2492RD8I.
Available memory: 32.27 GB.
Time: 1 s.
Physical memory: 2.5 GB
Virtual memory: 2.61 GB
Ended at Jun 15, 2023 6:33:19 PM.
----- Compile Equations: Time Dependent in Study 1 (CV 1 to 39)/Solution 1
(sol2) ----->

```

### Dependent Variables 1 (v1)

#### GENERAL

| Description           | Value                          |
|-----------------------|--------------------------------|
| Defined by study step | <a href="#">Time Dependent</a> |

#### RESIDUAL SCALING

| Description | Value  |
|-------------|--------|
| Method      | Manual |

#### INITIAL VALUE CALCULATION CONSTANTS

| Constant name | Initial value source               |
|---------------|------------------------------------|
| t             | range(0*t_cv,t_tot/nb/200,39*t_cv) |
| timestep      | 0.21450000000000002[s]             |

#### LOG

```

<---- Dependent Variables 1 in Study 1 (CV 1 to 39)/Solution 1 (sol2) -----
Started at Jun 15, 2023 6:33:19 PM.
Solution time: 0 s.
Physical memory: 2.5 GB
Virtual memory: 2.61 GB
Ended at Jun 15, 2023 6:33:19 PM.
----- Dependent Variables 1 in Study 1 (CV 1 to 39)/Solution 1 (sol2) ----->

```

### Concentration (comp1.cOx) (comp1\_cOx)

#### GENERAL

| Description        | Value                                                    |
|--------------------|----------------------------------------------------------|
| Field components   | comp1.cOx                                                |
| Internal variables | {comp1.uflux.cOx, comp1.dflux.cOx, comp1.tds.dt2Inv_cOx} |

### Concentration (comp1.cRed) (comp1\_cRed)

#### GENERAL

| Description | Value |
|-------------|-------|
|-------------|-------|

| Description        | Value                                                       |
|--------------------|-------------------------------------------------------------|
| Field components   | comp1.cRed                                                  |
| Internal variables | {comp1.uflux.cRed, comp1.dflux.cRed, comp1.tds.dt2Inv_cRed} |

### Spatial mesh displacement (comp1.spatial.disp) (comp1\_spatial\_disp)

#### GENERAL

| Description      | Value                              |
|------------------|------------------------------------|
| Field components | {comp1.spatial.u, comp1.spatial.w} |

#### SCALING

| Description | Value                 |
|-------------|-----------------------|
| Method      | Manual                |
| Scale       | 2.4340912061794226E-7 |

### comp1.RgZg (comp1\_RgZg)

#### GENERAL

| Description          | Value    |
|----------------------|----------|
| Field components     | {Rg, Zg} |
| Solve for this field | Off      |

### Time-Dependent Solver 1 (t1)

#### GENERAL

| Description           | Value                                                                                                                                                                                                                                                                                                                                                                                                                                                                                                                                                                                                                                                                                                                                                                                                                                                                                                                                                                                                                                                                                                                                                                                                                                                                                                    |
|-----------------------|----------------------------------------------------------------------------------------------------------------------------------------------------------------------------------------------------------------------------------------------------------------------------------------------------------------------------------------------------------------------------------------------------------------------------------------------------------------------------------------------------------------------------------------------------------------------------------------------------------------------------------------------------------------------------------------------------------------------------------------------------------------------------------------------------------------------------------------------------------------------------------------------------------------------------------------------------------------------------------------------------------------------------------------------------------------------------------------------------------------------------------------------------------------------------------------------------------------------------------------------------------------------------------------------------------|
| Defined by study step | <a href="#">Time Dependent</a>                                                                                                                                                                                                                                                                                                                                                                                                                                                                                                                                                                                                                                                                                                                                                                                                                                                                                                                                                                                                                                                                                                                                                                                                                                                                           |
| Output times          | {0, 0.027500000000000004, 0.055000000000000001, 0.082500000000000002, 0.110000000000000001, 0.1375, 0.165000000000000004, 0.192500000000000003, 0.220000000000000003, 0.247500000000000003, 0.275, 0.302500000000000005, 0.330000000000000007, 0.357500000000000004, 0.385000000000000006, 0.412500000000000003, 0.440000000000000006, 0.467500000000000001, 0.495000000000000005, 0.522500000000000001, 0.55, 0.577500000000000001, 0.605000000000000001, 0.632500000000000001, 0.660000000000000001, 0.687500000000000001, 0.715000000000000001, 0.7425, 0.770000000000000001, 0.797500000000000001, 0.825000000000000001, 0.852500000000000001, 0.880000000000000001, 0.907500000000000001, 0.935000000000000002, 0.962500000000000001, 0.990000000000000001, 1.0175, 1.045000000000000002, 1.072500000000000002, 1.1, 1.127500000000000002, 1.155000000000000002, 1.1825, 1.210000000000000002, 1.237500000000000003, 1.265000000000000001, 1.292500000000000002, 1.320000000000000003, 1.347500000000000001, 1.375000000000000002, 1.4025, 1.430000000000000002, 1.457500000000000002, 1.485, 1.512500000000000002, 1.540000000000000003, 1.567500000000000001, 1.595000000000000002, 1.622500000000000003, 1.650000000000000001, 1.677500000000000002, 1.705000000000000003, 1.732500000000000002, |

| Description | Value                                                                                                                                                                                                                                                                                                                                                                                                                                                                                                                                                                                                                                                                                                                                                                                                                                                                                                                                                                                                                                                                                                                                                                                                                                                                                                                                                                                                                                                                                                                                                                                                                                                                                                                                                                                                                                                                                                                                                                                                                                                                                                                                                                                                                                                                                                                                                                                                                                                                                                                                                                                                                                                                                                                                                                                                                                                                                                                                                                                                                                                                                                                                                                                                                    |
|-------------|--------------------------------------------------------------------------------------------------------------------------------------------------------------------------------------------------------------------------------------------------------------------------------------------------------------------------------------------------------------------------------------------------------------------------------------------------------------------------------------------------------------------------------------------------------------------------------------------------------------------------------------------------------------------------------------------------------------------------------------------------------------------------------------------------------------------------------------------------------------------------------------------------------------------------------------------------------------------------------------------------------------------------------------------------------------------------------------------------------------------------------------------------------------------------------------------------------------------------------------------------------------------------------------------------------------------------------------------------------------------------------------------------------------------------------------------------------------------------------------------------------------------------------------------------------------------------------------------------------------------------------------------------------------------------------------------------------------------------------------------------------------------------------------------------------------------------------------------------------------------------------------------------------------------------------------------------------------------------------------------------------------------------------------------------------------------------------------------------------------------------------------------------------------------------------------------------------------------------------------------------------------------------------------------------------------------------------------------------------------------------------------------------------------------------------------------------------------------------------------------------------------------------------------------------------------------------------------------------------------------------------------------------------------------------------------------------------------------------------------------------------------------------------------------------------------------------------------------------------------------------------------------------------------------------------------------------------------------------------------------------------------------------------------------------------------------------------------------------------------------------------------------------------------------------------------------------------------------------|
|             | 1.7600000000000002, 1.7875000000000003, 1.8150000000000002,<br>1.8425000000000002, 1.8700000000000003, 1.8975000000000002,<br>1.9250000000000003, 1.9525000000000003, 1.9800000000000002,<br>2.0075000000000003, 2.035, 2.0625000000000004, 2.0900000000000003,<br>2.1175, 2.1450000000000005, 2.1725000000000003, 2.2,<br>2.2275000000000005, 2.2550000000000003, 2.2825, 2.3100000000000005,<br>2.3375000000000004, 2.365, 2.3925000000000005, 2.4200000000000004,<br>2.4475000000000002, 2.4750000000000005, 2.5025000000000004,<br>2.5300000000000002, 2.5575000000000006, 2.5850000000000004,<br>2.6125000000000003, 2.6400000000000006, 2.6675000000000004,<br>2.6950000000000003, 2.7225, 2.7500000000000004, 2.7775000000000003,<br>2.805, 2.8325000000000005, 2.8600000000000003, 2.8875,<br>2.9150000000000005, 2.9425000000000003, 2.97, 2.9975000000000005,<br>3.0250000000000004, 3.0525, 3.0800000000000005, 3.1075000000000004,<br>3.1350000000000002, 3.1625000000000005, 3.1900000000000004,<br>3.2175000000000002, 3.2450000000000006, 3.2725000000000004,<br>3.3000000000000003, 3.3275000000000006, 3.3550000000000004,<br>3.3825000000000003, 3.4100000000000006, 3.4375000000000004,<br>3.4650000000000003, 3.4925000000000006, 3.5200000000000005,<br>3.5475000000000003, 3.5750000000000006, 3.6025000000000005,<br>3.6300000000000003, 3.6575000000000006, 3.6850000000000005,<br>3.7125000000000004, 3.7400000000000007, 3.7675000000000005,<br>3.7950000000000004, 3.8225000000000007, 3.8500000000000005,<br>3.8775000000000004, 3.9050000000000007, 3.9325000000000006,<br>3.9600000000000004, 3.9875000000000007, 4.0150000000000001, 4.0425,<br>4.07, 4.0975, 4.1250000000000001, 4.1525000000000001,<br>4.1800000000000001, 4.2075000000000005, 4.235, 4.2625,<br>4.2900000000000001, 4.3175000000000001, 4.3450000000000001,<br>4.3725000000000005, 4.4, 4.4275, 4.4550000000000001,<br>4.4825000000000001, 4.5100000000000001, 4.5375000000000005, 4.565,<br>4.5925, 4.6200000000000001, 4.6475000000000001, 4.6750000000000001,<br>4.7025000000000001, 4.73, 4.7575, 4.7850000000000001,<br>4.8125000000000001, 4.8400000000000001, 4.8675000000000001,<br>4.8950000000000005, 4.9225, 4.9500000000000001, 4.9775000000000001,<br>5.0050000000000001, 5.0325000000000001, 5.0600000000000005, 5.0875,<br>5.1150000000000001, 5.1425000000000001, 5.1700000000000001,<br>5.1975000000000001, 5.2250000000000005, 5.2525, 5.2800000000000001,<br>5.3075000000000001, 5.3350000000000001, 5.3625000000000001,<br>5.3900000000000001, 5.4175, 5.445, 5.4725000000000001,<br>5.5000000000000001, 5.5275000000000001, 5.5550000000000001,<br>5.5825000000000005, 5.61, 5.6375000000000001, 5.6650000000000001,<br>5.6925000000000001, 5.7200000000000001, 5.7475000000000005, 5.775,<br>5.8025000000000001, 5.8300000000000001, 5.8575000000000001,<br>5.8850000000000001, 5.9125000000000005, 5.94, 5.9675000000000001,<br>5.9950000000000001, 6.0225000000000001, 6.0500000000000001,<br>6.0775000000000001, 6.105, 6.1325000000000001, 6.1600000000000001,<br>6.1875000000000001, 6.2150000000000001, 6.2425000000000001,<br>6.2700000000000005, 6.2975000000000001, 6.3250000000000001, |

| Description | Value                                                                                                                                                                                                                                                                                                                                                                                                                                                                                                                                                                                                                                                                                                                                                                                                                                                                                                                                                                                                                                                                                                                                                                                                                                                                                                                                                                                                                                                                                                                                                                                                                                                                                                                                                                                                                                                                                                                                                                                                                                                                                                                                                                                                                                                                                                                                                                                                                                                                                                                                                                                                                                                                                                                                                                                                                                                                                                                                                                                                                                                                                                 |
|-------------|-------------------------------------------------------------------------------------------------------------------------------------------------------------------------------------------------------------------------------------------------------------------------------------------------------------------------------------------------------------------------------------------------------------------------------------------------------------------------------------------------------------------------------------------------------------------------------------------------------------------------------------------------------------------------------------------------------------------------------------------------------------------------------------------------------------------------------------------------------------------------------------------------------------------------------------------------------------------------------------------------------------------------------------------------------------------------------------------------------------------------------------------------------------------------------------------------------------------------------------------------------------------------------------------------------------------------------------------------------------------------------------------------------------------------------------------------------------------------------------------------------------------------------------------------------------------------------------------------------------------------------------------------------------------------------------------------------------------------------------------------------------------------------------------------------------------------------------------------------------------------------------------------------------------------------------------------------------------------------------------------------------------------------------------------------------------------------------------------------------------------------------------------------------------------------------------------------------------------------------------------------------------------------------------------------------------------------------------------------------------------------------------------------------------------------------------------------------------------------------------------------------------------------------------------------------------------------------------------------------------------------------------------------------------------------------------------------------------------------------------------------------------------------------------------------------------------------------------------------------------------------------------------------------------------------------------------------------------------------------------------------------------------------------------------------------------------------------------------------|
|             | 6.352500000000001, 6.380000000000001, 6.407500000000001,<br>6.435000000000005, 6.462500000000001, 6.490000000000001,<br>6.517500000000001, 6.545000000000001, 6.572500000000001,<br>6.600000000000005, 6.627500000000001, 6.655000000000001,<br>6.682500000000001, 6.710000000000001, 6.737500000000001,<br>6.765000000000001, 6.792500000000001, 6.820000000000001,<br>6.847500000000001, 6.875000000000001, 6.902500000000001,<br>6.930000000000001, 6.957500000000001, 6.985000000000001,<br>7.012500000000001, 7.040000000000001, 7.067500000000001,<br>7.095000000000001, 7.122500000000005, 7.150000000000001,<br>7.177500000000001, 7.205000000000001, 7.232500000000001,<br>7.260000000000001, 7.287500000000005, 7.315000000000001,<br>7.342500000000001, 7.370000000000001, 7.397500000000001,<br>7.425000000000001, 7.452500000000001, 7.480000000000001,<br>7.507500000000001, 7.535000000000001, 7.562500000000001,<br>7.590000000000001, 7.617500000000001, 7.645000000000001,<br>7.672500000000001, 7.700000000000001, 7.727500000000001,<br>7.755000000000001, 7.782500000000001, 7.810000000000001,<br>7.837500000000001, 7.865000000000001, 7.892500000000001,<br>7.920000000000001, 7.947500000000001, 7.975000000000001,<br>8.002500000000001, 8.030000000000001, 8.057500000000001, 8.085,<br>8.1125, 8.14, 8.1675, 8.195, 8.222500000000002, 8.250000000000002,<br>8.277500000000002, 8.305000000000001, 8.332500000000001,<br>8.360000000000001, 8.387500000000001, 8.415000000000001, 8.4425,<br>8.47, 8.4975, 8.525, 8.552500000000002, 8.580000000000002,<br>8.607500000000002, 8.635000000000002, 8.662500000000001,<br>8.690000000000001, 8.717500000000001, 8.745000000000001, 8.7725, 8.8,<br>8.8275, 8.855, 8.8825, 8.910000000000002, 8.937500000000002,<br>8.965000000000002, 8.992500000000001, 9.020000000000001,<br>9.047500000000001, 9.075000000000001, 9.102500000000001, 9.13,<br>9.1575, 9.185, 9.2125, 9.240000000000002, 9.267500000000002,<br>9.295000000000002, 9.322500000000002, 9.350000000000001,<br>9.377500000000001, 9.405000000000001, 9.432500000000001, 9.46,<br>9.4875, 9.515, 9.5425, 9.570000000000002, 9.597500000000002,<br>9.625000000000002, 9.652500000000002, 9.680000000000001,<br>9.707500000000001, 9.735000000000001, 9.762500000000001,<br>9.790000000000001, 9.8175, 9.845, 9.8725, 9.900000000000002,<br>9.927500000000002, 9.955000000000002, 9.982500000000002,<br>10.010000000000002, 10.037500000000001, 10.065000000000001,<br>10.092500000000001, 10.120000000000001, 10.1475, 10.175, 10.2025,<br>10.230000000000002, 10.257500000000002, 10.285000000000002,<br>10.312500000000002, 10.340000000000002, 10.367500000000001,<br>10.395000000000001, 10.422500000000001, 10.450000000000001,<br>10.477500000000001, 10.505, 10.5325, 10.560000000000002,<br>10.587500000000002, 10.615000000000002, 10.642500000000002,<br>10.670000000000002, 10.697500000000002, 10.725000000000001,<br>10.752500000000001, 10.780000000000001, 10.807500000000001, 10.835,<br>10.8625, 10.89, 10.917500000000002, 10.945000000000002, |

| Description | Value                                                                                                                                                                                                                                                                                                                                                                                                                                                                                                                                                                                                                                                                                                                                                                                                                                                                                                                                                                                                                                                                                                                                                                                                                                                                                                                                                                                                                                                                                                                                                                                                                                                                                                                                                                                                                                                                                                                                                                                                                                                                                                                                                                                                                                                                                                                                                                                                                                                                                                                                                                                                                                                                                                                                                                                                                                                                                                                                                                           |
|-------------|---------------------------------------------------------------------------------------------------------------------------------------------------------------------------------------------------------------------------------------------------------------------------------------------------------------------------------------------------------------------------------------------------------------------------------------------------------------------------------------------------------------------------------------------------------------------------------------------------------------------------------------------------------------------------------------------------------------------------------------------------------------------------------------------------------------------------------------------------------------------------------------------------------------------------------------------------------------------------------------------------------------------------------------------------------------------------------------------------------------------------------------------------------------------------------------------------------------------------------------------------------------------------------------------------------------------------------------------------------------------------------------------------------------------------------------------------------------------------------------------------------------------------------------------------------------------------------------------------------------------------------------------------------------------------------------------------------------------------------------------------------------------------------------------------------------------------------------------------------------------------------------------------------------------------------------------------------------------------------------------------------------------------------------------------------------------------------------------------------------------------------------------------------------------------------------------------------------------------------------------------------------------------------------------------------------------------------------------------------------------------------------------------------------------------------------------------------------------------------------------------------------------------------------------------------------------------------------------------------------------------------------------------------------------------------------------------------------------------------------------------------------------------------------------------------------------------------------------------------------------------------------------------------------------------------------------------------------------------------|
|             | 10.972500000000002, 11.000000000000002, 11.027500000000002, 11.055000000000001, 11.082500000000001, 11.110000000000001, 11.137500000000001, 11.165000000000001, 11.1925, 11.22, 11.247500000000002, 11.275000000000002, 11.302500000000002, 11.330000000000002, 11.357500000000002, 11.385000000000002, 11.412500000000001, 11.440000000000001, 11.467500000000001, 11.495000000000001, 11.5225, 11.55, 11.577500000000002, 11.605000000000002, 11.632500000000002, 11.660000000000002, 11.687500000000002, 11.715000000000002, 11.742500000000001, 11.770000000000001, 11.797500000000001, 11.825000000000001, 11.852500000000001, 11.88, 11.907500000000002, 11.935000000000002, 11.962500000000002, 11.990000000000002, 12.017500000000002, 12.045000000000002, 12.072500000000002, 12.100000000000001, 12.127500000000001, 12.155000000000001, 12.182500000000001, 12.21, 12.237500000000002, 12.265000000000002, 12.292500000000002, 12.320000000000002, 12.347500000000002, 12.375000000000002, 12.402500000000002, 12.430000000000001, 12.457500000000001, 12.485000000000001, 12.512500000000001, 12.540000000000001, 12.5675, 12.595000000000002, 12.622500000000002, 12.650000000000002, 12.677500000000002, 12.705000000000002, 12.732500000000002, 12.760000000000002, 12.787500000000001, 12.815000000000001, 12.842500000000001, 12.870000000000001, 12.8975, 12.925000000000002, 12.952500000000002, 12.980000000000002, 13.007500000000002, 13.035000000000002, 13.062500000000002, 13.090000000000002, 13.117500000000001, 13.145000000000001, 13.172500000000001, 13.200000000000001, 13.227500000000001, 13.255000000000003, 13.282500000000002, 13.310000000000002, 13.337500000000002, 13.365000000000002, 13.392500000000002, 13.420000000000002, 13.447500000000002, 13.475000000000001, 13.502500000000001, 13.530000000000001, 13.557500000000001, 13.585000000000003, 13.612500000000002, 13.640000000000002, 13.667500000000002, 13.695000000000002, 13.722500000000002, 13.750000000000002, 13.777500000000002, 13.805000000000001, 13.832500000000001, 13.860000000000001, 13.887500000000001, 13.915000000000003, 13.942500000000003, 13.970000000000002, 13.997500000000002, 14.025000000000002, 14.052500000000002, 14.080000000000002, 14.107500000000002, 14.135000000000002, 14.162500000000001, 14.190000000000001, 14.217500000000001, 14.245000000000001, 14.272500000000003, 14.300000000000002, 14.327500000000002, 14.355000000000002, 14.382500000000002, 14.410000000000002, 14.437500000000002, 14.465000000000002, 14.492500000000001, 14.520000000000001, 14.547500000000001, 14.575000000000001, 14.602500000000003, 14.630000000000003, 14.657500000000002, 14.685000000000002, 14.712500000000002, 14.740000000000002, 14.767500000000002, 14.795000000000002, 14.822500000000002, 14.850000000000001, 14.877500000000001, 14.905000000000001, 14.932500000000003, 14.960000000000003, 14.987500000000002, 15.015000000000002, |

| Description | Value                                                                                                                                                                                                                                                                                                                                                                                                                                                                                                                                                                                                                                                                                                                                                                                                                                                                                                                                                                                                                                                                                                                                                                                                                                                                                                                                                                                                                                                                                                                                                                                                                                                                                                                                                                                                                                                                                                                                                                                                                                                                                                                                                                                                                                                                                                                                                                                                                                                                                                                                                                                                                                                                                                                                                                                                                                                                                                                                                                                                                                                                                                                                                                                            |
|-------------|--------------------------------------------------------------------------------------------------------------------------------------------------------------------------------------------------------------------------------------------------------------------------------------------------------------------------------------------------------------------------------------------------------------------------------------------------------------------------------------------------------------------------------------------------------------------------------------------------------------------------------------------------------------------------------------------------------------------------------------------------------------------------------------------------------------------------------------------------------------------------------------------------------------------------------------------------------------------------------------------------------------------------------------------------------------------------------------------------------------------------------------------------------------------------------------------------------------------------------------------------------------------------------------------------------------------------------------------------------------------------------------------------------------------------------------------------------------------------------------------------------------------------------------------------------------------------------------------------------------------------------------------------------------------------------------------------------------------------------------------------------------------------------------------------------------------------------------------------------------------------------------------------------------------------------------------------------------------------------------------------------------------------------------------------------------------------------------------------------------------------------------------------------------------------------------------------------------------------------------------------------------------------------------------------------------------------------------------------------------------------------------------------------------------------------------------------------------------------------------------------------------------------------------------------------------------------------------------------------------------------------------------------------------------------------------------------------------------------------------------------------------------------------------------------------------------------------------------------------------------------------------------------------------------------------------------------------------------------------------------------------------------------------------------------------------------------------------------------------------------------------------------------------------------------------------------------|
|             | 15.042500000000002, 15.070000000000002, 15.097500000000002,<br>15.125000000000002, 15.152500000000002, 15.180000000000001,<br>15.207500000000001, 15.235000000000001, 15.262500000000003,<br>15.290000000000003, 15.317500000000003, 15.345000000000002,<br>15.372500000000002, 15.400000000000002, 15.427500000000002,<br>15.455000000000002, 15.482500000000002, 15.510000000000002,<br>15.537500000000001, 15.565000000000001, 15.592500000000003,<br>15.620000000000003, 15.647500000000003, 15.675000000000002,<br>15.702500000000002, 15.730000000000002, 15.757500000000002,<br>15.785000000000002, 15.812500000000002, 15.840000000000002,<br>15.867500000000001, 15.895000000000001, 15.922500000000001,<br>15.950000000000003, 15.977500000000003, 16.005000000000003,<br>16.032500000000002, 16.060000000000002, 16.087500000000002,<br>16.115000000000002, 16.142500000000002, 16.17, 16.1975, 16.225,<br>16.2525, 16.28, 16.3075, 16.335, 16.3625, 16.39, 16.4175,<br>16.445000000000004, 16.472500000000004, 16.500000000000004,<br>16.527500000000003, 16.555000000000003, 16.582500000000003,<br>16.610000000000003, 16.637500000000003, 16.665000000000003,<br>16.692500000000003, 16.720000000000002, 16.747500000000002,<br>16.775000000000002, 16.802500000000002, 16.830000000000002,<br>16.8575, 16.885, 16.9125, 16.94, 16.9675, 16.995, 17.0225, 17.05, 17.0775,<br>17.105000000000004, 17.132500000000004, 17.160000000000004,<br>17.187500000000004, 17.215000000000003, 17.242500000000003,<br>17.270000000000003, 17.297500000000003, 17.325000000000003,<br>17.352500000000003, 17.380000000000003, 17.407500000000002,<br>17.435000000000002, 17.462500000000002, 17.490000000000002,<br>17.517500000000002, 17.545, 17.5725, 17.6, 17.6275, 17.655, 17.6825,<br>17.71, 17.7375, 17.765, 17.792500000000004, 17.820000000000004,<br>17.847500000000004, 17.875000000000004, 17.902500000000003,<br>17.930000000000003, 17.957500000000003, 17.985000000000003,<br>18.012500000000003, 18.040000000000003, 18.067500000000003,<br>18.095000000000002, 18.122500000000002, 18.150000000000002,<br>18.177500000000002, 18.205000000000002, 18.2325, 18.26, 18.2875,<br>18.315, 18.3425, 18.37, 18.3975, 18.425, 18.452500000000004,<br>18.480000000000004, 18.507500000000004, 18.535000000000004,<br>18.562500000000004, 18.590000000000003, 18.617500000000003,<br>18.645000000000003, 18.672500000000003, 18.700000000000003,<br>18.727500000000003, 18.755000000000003, 18.782500000000002,<br>18.810000000000002, 18.837500000000002, 18.865000000000002,<br>18.892500000000002, 18.92, 18.9475, 18.975, 19.0025, 19.03, 19.0575,<br>19.085, 19.112500000000004, 19.140000000000004, 19.167500000000004,<br>19.195000000000004, 19.222500000000004, 19.250000000000004,<br>19.277500000000003, 19.305000000000003, 19.332500000000003,<br>19.360000000000003, 19.387500000000003, 19.415000000000003,<br>19.442500000000003, 19.470000000000002, 19.497500000000002,<br>19.525000000000002, 19.552500000000002, 19.580000000000002,<br>19.6075, 19.635, 19.6625, 19.69, 19.7175, 19.745, 19.7725,<br>19.800000000000004, 19.827500000000004, 19.855000000000004, |

| Description | Value                                                                                                                                                                                                                                                                                                                                                                                                                                                                                                                                                                                                                                                                                                                                                                                                                                                                                                                                                                                                                                                                                                                                                                                                                                                                                                                                                                                                                                                                                                                                                                                                                                                                                                                                                                                                                                                                                                                                                                                                                                                                                                                                                                                                                                                                                                                                                                                                                                                                                                                                                                                                                                                                                                                                                                                                                                                                                                                                                                                                                                                                                                                                                                                  |
|-------------|----------------------------------------------------------------------------------------------------------------------------------------------------------------------------------------------------------------------------------------------------------------------------------------------------------------------------------------------------------------------------------------------------------------------------------------------------------------------------------------------------------------------------------------------------------------------------------------------------------------------------------------------------------------------------------------------------------------------------------------------------------------------------------------------------------------------------------------------------------------------------------------------------------------------------------------------------------------------------------------------------------------------------------------------------------------------------------------------------------------------------------------------------------------------------------------------------------------------------------------------------------------------------------------------------------------------------------------------------------------------------------------------------------------------------------------------------------------------------------------------------------------------------------------------------------------------------------------------------------------------------------------------------------------------------------------------------------------------------------------------------------------------------------------------------------------------------------------------------------------------------------------------------------------------------------------------------------------------------------------------------------------------------------------------------------------------------------------------------------------------------------------------------------------------------------------------------------------------------------------------------------------------------------------------------------------------------------------------------------------------------------------------------------------------------------------------------------------------------------------------------------------------------------------------------------------------------------------------------------------------------------------------------------------------------------------------------------------------------------------------------------------------------------------------------------------------------------------------------------------------------------------------------------------------------------------------------------------------------------------------------------------------------------------------------------------------------------------------------------------------------------------------------------------------------------------|
|             | 19.882500000000004, 19.910000000000004, 19.937500000000004,<br>19.965000000000003, 19.992500000000003, 20.020000000000003,<br>20.047500000000003, 20.075000000000003, 20.102500000000003,<br>20.130000000000003, 20.157500000000002, 20.185000000000002,<br>20.212500000000002, 20.240000000000002, 20.267500000000002, 20.295,<br>20.3225, 20.35, 20.3775, 20.405, 20.4325, 20.460000000000004,<br>20.487500000000004, 20.515000000000004, 20.542500000000004,<br>20.570000000000004, 20.597500000000004, 20.625000000000004,<br>20.652500000000003, 20.680000000000003, 20.707500000000003,<br>20.735000000000003, 20.762500000000003, 20.790000000000003,<br>20.817500000000003, 20.845000000000002, 20.872500000000002,<br>20.900000000000002, 20.927500000000002, 20.955000000000002,<br>20.9825, 21.01, 21.0375, 21.065, 21.0925, 21.120000000000005,<br>21.147500000000004, 21.175000000000004, 21.202500000000004,<br>21.230000000000004, 21.257500000000004, 21.285000000000004,<br>21.312500000000004, 21.340000000000003, 21.367500000000003,<br>21.395000000000003, 21.422500000000003, 21.450000000000003,<br>21.477500000000003, 21.505000000000003, 21.532500000000002,<br>21.560000000000002, 21.587500000000002, 21.615000000000002,<br>21.642500000000002, 21.67, 21.6975, 21.725, 21.7525, 21.78,<br>21.807500000000005, 21.835000000000004, 21.862500000000004,<br>21.890000000000004, 21.917500000000004, 21.945000000000004,<br>21.972500000000004, 22.000000000000004, 22.027500000000003,<br>22.055000000000003, 22.082500000000003, 22.110000000000003,<br>22.137500000000003, 22.165000000000003, 22.192500000000003,<br>22.220000000000002, 22.247500000000002, 22.275000000000002,<br>22.302500000000002, 22.330000000000002, 22.3575, 22.385, 22.4125,<br>22.44, 22.467500000000005, 22.495000000000005, 22.522500000000004,<br>22.550000000000004, 22.577500000000004, 22.605000000000004,<br>22.632500000000004, 22.660000000000004, 22.687500000000004,<br>22.715000000000003, 22.742500000000003, 22.770000000000003,<br>22.797500000000003, 22.825000000000003, 22.852500000000003,<br>22.880000000000003, 22.907500000000002, 22.935000000000002,<br>22.962500000000002, 22.990000000000002, 23.017500000000002, 23.045,<br>23.0725, 23.1, 23.1275, 23.155000000000005, 23.182500000000005,<br>23.210000000000004, 23.237500000000004, 23.265000000000004,<br>23.292500000000004, 23.320000000000004, 23.347500000000004,<br>23.375000000000004, 23.402500000000003, 23.430000000000003,<br>23.457500000000003, 23.485000000000003, 23.512500000000003,<br>23.540000000000003, 23.567500000000003, 23.595000000000002,<br>23.622500000000002, 23.650000000000002, 23.677500000000002,<br>23.705000000000002, 23.7325, 23.76, 23.7875, 23.815000000000005,<br>23.842500000000005, 23.870000000000005, 23.897500000000004,<br>23.925000000000004, 23.952500000000004, 23.980000000000004,<br>24.007500000000004, 24.035000000000004, 24.062500000000004,<br>24.090000000000003, 24.117500000000003, 24.145000000000003,<br>24.172500000000003, 24.200000000000003, 24.227500000000003,<br>24.255000000000003, 24.282500000000002, 24.310000000000002, |



| Description | Value                                                                                                                                                                                                                                                                                                                                                                                                                                                                                                                                                                                                                                                                                                                                                                                                                                                                                                                                                                                                                                                                                                                                                                                                                                                                                                                                                                                                                                                                                                                                                                                                                                                                                                                                                                                                                                                                                                                                                                                                                                                                                                                                                                                                                                                                                                                                                                                                                                                                                                                                                                                                                                                                                                                                                                                                                                                                                                                                                                                                                                                                                                                              |
|-------------|------------------------------------------------------------------------------------------------------------------------------------------------------------------------------------------------------------------------------------------------------------------------------------------------------------------------------------------------------------------------------------------------------------------------------------------------------------------------------------------------------------------------------------------------------------------------------------------------------------------------------------------------------------------------------------------------------------------------------------------------------------------------------------------------------------------------------------------------------------------------------------------------------------------------------------------------------------------------------------------------------------------------------------------------------------------------------------------------------------------------------------------------------------------------------------------------------------------------------------------------------------------------------------------------------------------------------------------------------------------------------------------------------------------------------------------------------------------------------------------------------------------------------------------------------------------------------------------------------------------------------------------------------------------------------------------------------------------------------------------------------------------------------------------------------------------------------------------------------------------------------------------------------------------------------------------------------------------------------------------------------------------------------------------------------------------------------------------------------------------------------------------------------------------------------------------------------------------------------------------------------------------------------------------------------------------------------------------------------------------------------------------------------------------------------------------------------------------------------------------------------------------------------------------------------------------------------------------------------------------------------------------------------------------------------------------------------------------------------------------------------------------------------------------------------------------------------------------------------------------------------------------------------------------------------------------------------------------------------------------------------------------------------------------------------------------------------------------------------------------------------------|
|             | 24.337500000000002, 24.365000000000002, 24.392500000000002, 24.42,<br>24.4475, 24.475000000000005, 24.502500000000005,<br>24.530000000000005, 24.557500000000005, 24.585000000000004,<br>24.612500000000004, 24.640000000000004, 24.667500000000004,<br>24.695000000000004, 24.722500000000004, 24.750000000000004,<br>24.777500000000003, 24.805000000000003, 24.832500000000003,<br>24.860000000000003, 24.887500000000003, 24.915000000000003,<br>24.942500000000003, 24.970000000000002, 24.997500000000002,<br>25.025000000000002, 25.052500000000002, 25.080000000000002,<br>25.1075, 25.135, 25.162500000000005, 25.190000000000005,<br>25.217500000000005, 25.245000000000005, 25.272500000000004,<br>25.300000000000004, 25.327500000000004, 25.355000000000004,<br>25.382500000000004, 25.410000000000004, 25.437500000000004,<br>25.465000000000003, 25.492500000000003, 25.520000000000003,<br>25.547500000000003, 25.575000000000003, 25.602500000000003,<br>25.630000000000003, 25.657500000000002, 25.685000000000002,<br>25.712500000000002, 25.740000000000002, 25.767500000000002, 25.795,<br>25.822500000000005, 25.850000000000005, 25.877500000000005,<br>25.905000000000005, 25.932500000000005, 25.960000000000004,<br>25.987500000000004, 26.015000000000004, 26.042500000000004,<br>26.070000000000004, 26.097500000000004, 26.125000000000004,<br>26.152500000000003, 26.180000000000003, 26.207500000000003,<br>26.235000000000003, 26.262500000000003, 26.290000000000003,<br>26.317500000000003, 26.345000000000002, 26.372500000000002,<br>26.400000000000002, 26.427500000000002, 26.455000000000002,<br>26.4825, 26.510000000000005, 26.537500000000005,<br>26.565000000000005, 26.592500000000005, 26.620000000000005,<br>26.647500000000004, 26.675000000000004, 26.702500000000004,<br>26.730000000000004, 26.757500000000004, 26.785000000000004,<br>26.812500000000004, 26.840000000000003, 26.867500000000003,<br>26.895000000000003, 26.922500000000003, 26.950000000000003,<br>26.977500000000003, 27.005000000000003, 27.032500000000002,<br>27.060000000000002, 27.087500000000002, 27.115000000000002,<br>27.142500000000002, 27.170000000000005, 27.197500000000005,<br>27.225000000000005, 27.252500000000005, 27.280000000000005,<br>27.307500000000005, 27.335000000000004, 27.362500000000004,<br>27.390000000000004, 27.417500000000004, 27.445000000000004,<br>27.472500000000004, 27.500000000000004, 27.527500000000003,<br>27.555000000000003, 27.582500000000003, 27.610000000000003,<br>27.637500000000003, 27.665000000000003, 27.692500000000003,<br>27.720000000000002, 27.747500000000002, 27.775000000000002,<br>27.802500000000002, 27.830000000000005, 27.857500000000005,<br>27.885000000000005, 27.912500000000005, 27.940000000000005,<br>27.967500000000005, 27.995000000000005, 28.022500000000004,<br>28.050000000000004, 28.077500000000004, 28.105000000000004,<br>28.132500000000004, 28.160000000000004, 28.187500000000004,<br>28.215000000000003, 28.242500000000003, 28.270000000000003,<br>28.297500000000003, 28.325000000000003, 28.352500000000003, |

| Description | Value                                                                                                                                                                                                                                                                                                                                                                                                                                                                                                                                                                                                                                                                                                                                                                                                                                                                                                                                                                                                                                                                                                                                                                                                                                                                                                                                                                                                                                                                                                                                                                                                                                                                                                                                                                                                                                                                                                                                                                                                                                                                                                                                                                                                                                                                                                                                                                                                                                                                                                                                                                                                                                                                                                                                                                                                                                                                                                                                                                                                                                                                                                                                          |
|-------------|------------------------------------------------------------------------------------------------------------------------------------------------------------------------------------------------------------------------------------------------------------------------------------------------------------------------------------------------------------------------------------------------------------------------------------------------------------------------------------------------------------------------------------------------------------------------------------------------------------------------------------------------------------------------------------------------------------------------------------------------------------------------------------------------------------------------------------------------------------------------------------------------------------------------------------------------------------------------------------------------------------------------------------------------------------------------------------------------------------------------------------------------------------------------------------------------------------------------------------------------------------------------------------------------------------------------------------------------------------------------------------------------------------------------------------------------------------------------------------------------------------------------------------------------------------------------------------------------------------------------------------------------------------------------------------------------------------------------------------------------------------------------------------------------------------------------------------------------------------------------------------------------------------------------------------------------------------------------------------------------------------------------------------------------------------------------------------------------------------------------------------------------------------------------------------------------------------------------------------------------------------------------------------------------------------------------------------------------------------------------------------------------------------------------------------------------------------------------------------------------------------------------------------------------------------------------------------------------------------------------------------------------------------------------------------------------------------------------------------------------------------------------------------------------------------------------------------------------------------------------------------------------------------------------------------------------------------------------------------------------------------------------------------------------------------------------------------------------------------------------------------------------|
|             | 28.380000000000003, 28.407500000000002, 28.435000000000002,<br>28.462500000000002, 28.490000000000002, 28.517500000000005,<br>28.545000000000005, 28.572500000000005, 28.600000000000005,<br>28.627500000000005, 28.655000000000005, 28.682500000000005,<br>28.710000000000004, 28.737500000000004, 28.765000000000004,<br>28.792500000000004, 28.820000000000004, 28.847500000000004,<br>28.875000000000004, 28.902500000000003, 28.930000000000003,<br>28.957500000000003, 28.985000000000003, 29.012500000000003,<br>29.040000000000003, 29.067500000000003, 29.095000000000002,<br>29.122500000000002, 29.150000000000002, 29.177500000000006,<br>29.205000000000005, 29.232500000000005, 29.260000000000005,<br>29.287500000000005, 29.315000000000005, 29.342500000000005,<br>29.370000000000005, 29.397500000000004, 29.425000000000004,<br>29.452500000000004, 29.480000000000004, 29.507500000000004,<br>29.535000000000004, 29.562500000000004, 29.590000000000003,<br>29.617500000000003, 29.645000000000003, 29.672500000000003,<br>29.700000000000003, 29.727500000000003, 29.755000000000003,<br>29.782500000000002, 29.810000000000002, 29.837500000000006,<br>29.865000000000006, 29.892500000000005, 29.920000000000005,<br>29.947500000000005, 29.975000000000005, 30.002500000000005,<br>30.030000000000005, 30.057500000000005, 30.085000000000004,<br>30.112500000000004, 30.140000000000004, 30.167500000000004,<br>30.195000000000004, 30.222500000000004, 30.250000000000004,<br>30.277500000000003, 30.305000000000003, 30.332500000000003,<br>30.360000000000003, 30.387500000000003, 30.415000000000003,<br>30.442500000000003, 30.470000000000002, 30.497500000000002,<br>30.525000000000006, 30.552500000000006, 30.580000000000005,<br>30.607500000000005, 30.635000000000005, 30.662500000000005,<br>30.690000000000005, 30.717500000000005, 30.745000000000005,<br>30.772500000000004, 30.800000000000004, 30.827500000000004,<br>30.855000000000004, 30.882500000000004, 30.910000000000004,<br>30.937500000000004, 30.965000000000003, 30.992500000000003,<br>31.020000000000003, 31.047500000000003, 31.075000000000003,<br>31.102500000000003, 31.130000000000003, 31.157500000000002,<br>31.185000000000006, 31.212500000000006, 31.240000000000006,<br>31.267500000000005, 31.295000000000005, 31.322500000000005,<br>31.350000000000005, 31.377500000000005, 31.405000000000005,<br>31.432500000000005, 31.460000000000004, 31.487500000000004,<br>31.515000000000004, 31.542500000000004, 31.570000000000004,<br>31.597500000000004, 31.625000000000004, 31.652500000000003,<br>31.680000000000003, 31.707500000000003, 31.735000000000003,<br>31.762500000000003, 31.790000000000003, 31.817500000000003,<br>31.845000000000002, 31.872500000000006, 31.900000000000006,<br>31.927500000000006, 31.955000000000005, 31.982500000000005,<br>32.010000000000005, 32.0375, 32.065000000000005, 32.0925,<br>32.120000000000005, 32.1475, 32.175000000000004, 32.202500000000001,<br>32.230000000000004, 32.257500000000001, 32.285000000000004,<br>32.312500000000001, 32.34, 32.367500000000001, 32.395, |

| Description | Value                                                                                                                                                                                                                                                                                                                                                                                                                                                                                                                                                                                                                                                                                                                                                                                                                                                                                                                                                                                                                                                                                                                                                                                                                                                                                                                                                                                                                                                                                                                                                                                                                                                                                                                                                                                                                                                                                                                                                                                                                                                                                                                                                                                                                                                                                                                                                                                                                                                                                                                                                                                                                                                                                                                                                                                                                                                                                                                                                                                                                                                                                                                             |
|-------------|-----------------------------------------------------------------------------------------------------------------------------------------------------------------------------------------------------------------------------------------------------------------------------------------------------------------------------------------------------------------------------------------------------------------------------------------------------------------------------------------------------------------------------------------------------------------------------------------------------------------------------------------------------------------------------------------------------------------------------------------------------------------------------------------------------------------------------------------------------------------------------------------------------------------------------------------------------------------------------------------------------------------------------------------------------------------------------------------------------------------------------------------------------------------------------------------------------------------------------------------------------------------------------------------------------------------------------------------------------------------------------------------------------------------------------------------------------------------------------------------------------------------------------------------------------------------------------------------------------------------------------------------------------------------------------------------------------------------------------------------------------------------------------------------------------------------------------------------------------------------------------------------------------------------------------------------------------------------------------------------------------------------------------------------------------------------------------------------------------------------------------------------------------------------------------------------------------------------------------------------------------------------------------------------------------------------------------------------------------------------------------------------------------------------------------------------------------------------------------------------------------------------------------------------------------------------------------------------------------------------------------------------------------------------------------------------------------------------------------------------------------------------------------------------------------------------------------------------------------------------------------------------------------------------------------------------------------------------------------------------------------------------------------------------------------------------------------------------------------------------------------------|
|             | 32.42250000000001, 32.45, 32.477500000000006, 32.505,<br>32.532500000000006, 32.56, 32.587500000000006, 32.615,<br>32.642500000000005, 32.67, 32.697500000000005, 32.725,<br>32.752500000000005, 32.78, 32.807500000000005, 32.835,<br>32.862500000000004, 32.890000000000001, 32.917500000000004,<br>32.945000000000001, 32.972500000000004, 33.000000000000001, 33.0275,<br>33.055000000000001, 33.0825, 33.110000000000001, 33.1375,<br>33.165000000000006, 33.1925, 33.220000000000006, 33.2475,<br>33.275000000000006, 33.3025, 33.330000000000005, 33.3575,<br>33.385000000000005, 33.4125, 33.440000000000005, 33.4675,<br>33.495000000000005, 33.5225, 33.550000000000004, 33.577500000000001,<br>33.605000000000004, 33.632500000000001, 33.660000000000004,<br>33.687500000000001, 33.715, 33.742500000000001, 33.77,<br>33.797500000000001, 33.825, 33.852500000000006, 33.88,<br>33.907500000000006, 33.935, 33.962500000000006, 33.99,<br>34.017500000000005, 34.045, 34.072500000000005, 34.1,<br>34.127500000000005, 34.155, 34.182500000000005, 34.210000000000001,<br>34.237500000000004, 34.265000000000001, 34.292500000000004,<br>34.320000000000001, 34.347500000000004, 34.375000000000001, 34.4025,<br>34.430000000000001, 34.4575, 34.485000000000001, 34.5125,<br>34.540000000000006, 34.5675, 34.595000000000006, 34.6225,<br>34.650000000000006, 34.6775, 34.705000000000005, 34.7325,<br>34.760000000000005, 34.7875, 34.815000000000005, 34.8425,<br>34.870000000000005, 34.897500000000001, 34.925000000000004,<br>34.952500000000001, 34.980000000000004, 35.007500000000001,<br>35.035000000000004, 35.062500000000001, 35.09, 35.117500000000001,<br>35.145, 35.172500000000001, 35.2, 35.227500000000006, 35.255,<br>35.282500000000006, 35.31, 35.337500000000006, 35.365,<br>35.392500000000005, 35.42, 35.447500000000005, 35.475,<br>35.502500000000005, 35.53, 35.557500000000005, 35.585000000000001,<br>35.612500000000004, 35.640000000000001, 35.667500000000004,<br>35.695000000000001, 35.722500000000004, 35.750000000000001, 35.7775,<br>35.805000000000001, 35.8325, 35.860000000000001, 35.8875,<br>35.915000000000006, 35.9425, 35.970000000000006, 35.9975,<br>36.025000000000006, 36.0525, 36.080000000000005, 36.1075,<br>36.135000000000005, 36.1625, 36.190000000000005, 36.217500000000001,<br>36.245000000000005, 36.272500000000001, 36.300000000000004,<br>36.327500000000001, 36.355000000000004, 36.382500000000001,<br>36.410000000000004, 36.437500000000001, 36.465, 36.492500000000001,<br>36.52, 36.547500000000001, 36.575, 36.602500000000006, 36.63,<br>36.657500000000006, 36.685, 36.712500000000006, 36.74,<br>36.767500000000005, 36.795, 36.822500000000005, 36.85,<br>36.877500000000005, 36.905000000000001, 36.932500000000005,<br>36.960000000000001, 36.987500000000004, 37.015000000000001,<br>37.042500000000004, 37.070000000000001, 37.097500000000004,<br>37.125000000000001, 37.1525, 37.180000000000001, 37.2075,<br>37.235000000000001, 37.2625, 37.290000000000006, 37.3175,<br>37.345000000000006, 37.3725, 37.400000000000006, 37.4275, |

| Description | Value                                                                                                                                                                                                                                                                                                                                                                                                                                                                                                                                                                                                                                                                                                                                                                                                                                                                                                                                                                                                                                                                                                                                                                                                                                                                                                                                                                                                                                                                                                                                                                                                                                                                                                                                                                                                                                                                                                                                                                                                                                                                                                                                                                                                                                                                                                                                                                                                                                                                                                                                                                                                                                                                                                                                                                                                                                                                                                                                                                                                                  |
|-------------|------------------------------------------------------------------------------------------------------------------------------------------------------------------------------------------------------------------------------------------------------------------------------------------------------------------------------------------------------------------------------------------------------------------------------------------------------------------------------------------------------------------------------------------------------------------------------------------------------------------------------------------------------------------------------------------------------------------------------------------------------------------------------------------------------------------------------------------------------------------------------------------------------------------------------------------------------------------------------------------------------------------------------------------------------------------------------------------------------------------------------------------------------------------------------------------------------------------------------------------------------------------------------------------------------------------------------------------------------------------------------------------------------------------------------------------------------------------------------------------------------------------------------------------------------------------------------------------------------------------------------------------------------------------------------------------------------------------------------------------------------------------------------------------------------------------------------------------------------------------------------------------------------------------------------------------------------------------------------------------------------------------------------------------------------------------------------------------------------------------------------------------------------------------------------------------------------------------------------------------------------------------------------------------------------------------------------------------------------------------------------------------------------------------------------------------------------------------------------------------------------------------------------------------------------------------------------------------------------------------------------------------------------------------------------------------------------------------------------------------------------------------------------------------------------------------------------------------------------------------------------------------------------------------------------------------------------------------------------------------------------------------------|
|             | 37.45500000000005, 37.4825, 37.51000000000005, 37.5375,<br>37.56500000000005, 37.59250000000001, 37.62000000000005,<br>37.64750000000001, 37.67500000000004, 37.70250000000001,<br>37.73000000000004, 37.75750000000001, 37.78500000000004,<br>37.81250000000001, 37.84, 37.86750000000001, 37.895,<br>37.92250000000001, 37.95, 37.97750000000006, 38.005,<br>38.03250000000006, 38.06, 38.08750000000006, 38.115,<br>38.14250000000005, 38.17, 38.19750000000005, 38.22500000000001,<br>38.25250000000005, 38.28000000000001, 38.30750000000005,<br>38.33500000000001, 38.36250000000004, 38.39000000000001,<br>38.41750000000004, 38.44500000000001, 38.47250000000004,<br>38.50000000000001, 38.5275, 38.55500000000001, 38.5825,<br>38.61000000000001, 38.6375, 38.66500000000006, 38.6925,<br>38.72000000000006, 38.7475, 38.77500000000006, 38.8025,<br>38.83000000000005, 38.8575, 38.88500000000005, 38.91250000000001,<br>38.94000000000005, 38.96750000000001, 38.99500000000005,<br>39.02250000000001, 39.05000000000004, 39.07750000000001,<br>39.10500000000004, 39.13250000000001, 39.16000000000004,<br>39.18750000000001, 39.215, 39.24250000000001, 39.27,<br>39.29750000000001, 39.325, 39.35250000000006, 39.38,<br>39.40750000000006, 39.435, 39.46250000000006, 39.49,<br>39.51750000000005, 39.545, 39.57250000000005, 39.60000000000001,<br>39.62750000000005, 39.65500000000001, 39.68250000000005,<br>39.71000000000001, 39.73750000000004, 39.76500000000001,<br>39.79250000000004, 39.82000000000001, 39.84750000000004,<br>39.87500000000001, 39.9025, 39.93000000000001, 39.9575,<br>39.98500000000001, 40.0125, 40.04000000000006, 40.0675,<br>40.09500000000006, 40.1225, 40.15000000000006, 40.1775,<br>40.20500000000005, 40.23250000000001, 40.26000000000005,<br>40.28750000000001, 40.31500000000005, 40.34250000000001,<br>40.37000000000005, 40.39750000000001, 40.42500000000004,<br>40.45250000000001, 40.48000000000004, 40.50750000000001,<br>40.53500000000004, 40.56250000000001, 40.59, 40.61750000000001,<br>40.645, 40.67250000000001, 40.7, 40.72750000000006, 40.755,<br>40.78250000000006, 40.81, 40.83750000000006, 40.865,<br>40.89250000000005, 40.92000000000001, 40.94750000000005,<br>40.97500000000001, 41.00250000000005, 41.03000000000001,<br>41.05750000000005, 41.08500000000001, 41.11250000000004,<br>41.14000000000001, 41.16750000000004, 41.19500000000001,<br>41.22250000000004, 41.25000000000001, 41.2775, 41.30500000000001,<br>41.3325, 41.36000000000001, 41.3875, 41.41500000000006, 41.4425,<br>41.47000000000006, 41.4975, 41.52500000000006, 41.5525,<br>41.58000000000005, 41.60750000000001, 41.63500000000005,<br>41.66250000000001, 41.69000000000005, 41.71750000000001,<br>41.74500000000005, 41.77250000000001, 41.80000000000004,<br>41.82750000000001, 41.85500000000004, 41.88250000000001,<br>41.91000000000004, 41.93750000000001, 41.965, 41.99250000000001,<br>42.02, 42.04750000000001, 42.075, 42.10250000000006, 42.13, |

| Description | Value                                                                                                                                                                                                                                                                                                                                                                                                                                                                                                                                                                                                                                                                                                                                                                                                                                                                                                                                                                                                                                                                                                                                                                                                                                                                                                                                                                                                                                                                                                                                                                                                                                                                                                                                                                                                                                                                                                                                                                                                                                                                                                                                                                                                                                                                                                                                                                                                                                                                                                                                                                                                                                                                                                                                                                                                                                                                                                                                                                                                                                                                                                                                                                   |
|-------------|-------------------------------------------------------------------------------------------------------------------------------------------------------------------------------------------------------------------------------------------------------------------------------------------------------------------------------------------------------------------------------------------------------------------------------------------------------------------------------------------------------------------------------------------------------------------------------------------------------------------------------------------------------------------------------------------------------------------------------------------------------------------------------------------------------------------------------------------------------------------------------------------------------------------------------------------------------------------------------------------------------------------------------------------------------------------------------------------------------------------------------------------------------------------------------------------------------------------------------------------------------------------------------------------------------------------------------------------------------------------------------------------------------------------------------------------------------------------------------------------------------------------------------------------------------------------------------------------------------------------------------------------------------------------------------------------------------------------------------------------------------------------------------------------------------------------------------------------------------------------------------------------------------------------------------------------------------------------------------------------------------------------------------------------------------------------------------------------------------------------------------------------------------------------------------------------------------------------------------------------------------------------------------------------------------------------------------------------------------------------------------------------------------------------------------------------------------------------------------------------------------------------------------------------------------------------------------------------------------------------------------------------------------------------------------------------------------------------------------------------------------------------------------------------------------------------------------------------------------------------------------------------------------------------------------------------------------------------------------------------------------------------------------------------------------------------------------------------------------------------------------------------------------------------------|
|             | 42.157500000000006, 42.185, 42.212500000000006, 42.24000000000001,<br>42.267500000000005, 42.29500000000001, 42.322500000000005,<br>42.350000000000001, 42.377500000000005, 42.40500000000001,<br>42.432500000000005, 42.46000000000001, 42.487500000000004,<br>42.515000000000001, 42.542500000000004, 42.57000000000001,<br>42.597500000000004, 42.62500000000001, 42.6525, 42.68000000000001,<br>42.7075, 42.73500000000001, 42.7625, 42.790000000000006, 42.8175,<br>42.845000000000006, 42.8725, 42.900000000000006, 42.92750000000001,<br>42.955000000000005, 42.98250000000001, 43.010000000000005,<br>43.037500000000001, 43.065000000000005, 43.09250000000001,<br>43.120000000000005, 43.14750000000001, 43.175000000000004,<br>43.202500000000001, 43.230000000000004, 43.25750000000001,<br>43.285000000000004, 43.31250000000001, 43.34, 43.36750000000001,<br>43.395, 43.42250000000001, 43.45, 43.477500000000006, 43.505,<br>43.532500000000006, 43.56, 43.587500000000006, 43.61500000000001,<br>43.642500000000005, 43.67000000000001, 43.697500000000005,<br>43.72500000000001, 43.752500000000005, 43.78000000000001,<br>43.807500000000005, 43.83500000000001, 43.862500000000004,<br>43.890000000000001, 43.917500000000004, 43.94500000000001,<br>43.972500000000004, 44.00000000000001, 44.0275, 44.05500000000001,<br>44.0825, 44.11000000000001, 44.1375, 44.165000000000006, 44.1925,<br>44.220000000000006, 44.2475, 44.275000000000006, 44.30250000000001,<br>44.330000000000005, 44.35750000000001, 44.385000000000005,<br>44.41250000000001, 44.440000000000005, 44.46750000000001,<br>44.495000000000005, 44.52250000000001, 44.550000000000004,<br>44.57750000000001, 44.605000000000004, 44.63250000000001,<br>44.660000000000004, 44.68750000000001, 44.715, 44.74250000000001,<br>44.77, 44.79750000000001, 44.825, 44.852500000000006, 44.88,<br>44.907500000000006, 44.93500000000001, 44.962500000000006,<br>44.990000000000001, 45.017500000000005, 45.04500000000001,<br>45.072500000000005, 45.10000000000001, 45.127500000000005,<br>45.15500000000001, 45.182500000000005, 45.21000000000001,<br>45.237500000000004, 45.26500000000001, 45.292500000000004,<br>45.32000000000001, 45.347500000000004, 45.37500000000001, 45.4025,<br>45.43000000000001, 45.4575, 45.48500000000001, 45.5125,<br>45.540000000000006, 45.5675, 45.595000000000006, 45.62250000000001,<br>45.650000000000006, 45.67750000000001, 45.705000000000005,<br>45.73250000000001, 45.760000000000005, 45.78750000000001,<br>45.815000000000005, 45.84250000000001, 45.870000000000005,<br>45.89750000000001, 45.925000000000004, 45.95250000000001,<br>45.980000000000004, 46.00750000000001, 46.035000000000004,<br>46.06250000000001, 46.09, 46.11750000000001, 46.145,<br>46.17250000000001, 46.2, 46.227500000000006, 46.255,<br>46.282500000000006, 46.31000000000001, 46.337500000000006,<br>46.36500000000001, 46.392500000000005, 46.42000000000001,<br>46.447500000000005, 46.47500000000001, 46.502500000000005,<br>46.53000000000001, 46.557500000000005, 46.58500000000001,<br>46.612500000000004, 46.64000000000001, 46.667500000000004, |

| Description | Value                                                                                                                                                                                                                                                                                                                                                                                                                                                                                                                                                                                                                                                                                                                                                                                                                                                                                                                                                                                                                                                                                                                                                                                                                                                                                                                                                                                                                                                                                                                                                                                                                                                                                                                                                                                                                                                                                                                                                                                                                                                                                                                                                                                                                                                                                                                                                                                                                                                                                                                                                                                                                                                                                                                                                                                                                                                                                                                                                                                                                                                  |
|-------------|--------------------------------------------------------------------------------------------------------------------------------------------------------------------------------------------------------------------------------------------------------------------------------------------------------------------------------------------------------------------------------------------------------------------------------------------------------------------------------------------------------------------------------------------------------------------------------------------------------------------------------------------------------------------------------------------------------------------------------------------------------------------------------------------------------------------------------------------------------------------------------------------------------------------------------------------------------------------------------------------------------------------------------------------------------------------------------------------------------------------------------------------------------------------------------------------------------------------------------------------------------------------------------------------------------------------------------------------------------------------------------------------------------------------------------------------------------------------------------------------------------------------------------------------------------------------------------------------------------------------------------------------------------------------------------------------------------------------------------------------------------------------------------------------------------------------------------------------------------------------------------------------------------------------------------------------------------------------------------------------------------------------------------------------------------------------------------------------------------------------------------------------------------------------------------------------------------------------------------------------------------------------------------------------------------------------------------------------------------------------------------------------------------------------------------------------------------------------------------------------------------------------------------------------------------------------------------------------------------------------------------------------------------------------------------------------------------------------------------------------------------------------------------------------------------------------------------------------------------------------------------------------------------------------------------------------------------------------------------------------------------------------------------------------------------|
|             | 46.69500000000001, 46.72250000000004, 46.75000000000001, 46.7775,<br>46.80500000000001, 46.8325, 46.86000000000001, 46.8875,<br>46.91500000000006, 46.94250000000001, 46.97000000000006,<br>46.99750000000001, 47.02500000000006, 47.05250000000001,<br>47.08000000000005, 47.10750000000001, 47.13500000000005,<br>47.16250000000001, 47.19000000000005, 47.21750000000001,<br>47.24500000000005, 47.27250000000001, 47.30000000000004,<br>47.32750000000001, 47.35500000000004, 47.38250000000001,<br>47.41000000000004, 47.43750000000001, 47.465, 47.49250000000001,<br>47.52, 47.54750000000001, 47.575, 47.60250000000006,<br>47.63000000000001, 47.65750000000006, 47.68500000000001,<br>47.71250000000006, 47.74000000000001, 47.76750000000005,<br>47.79500000000001, 47.82250000000005, 47.85000000000001,<br>47.87750000000005, 47.90500000000001, 47.93250000000005,<br>47.96000000000001, 47.98750000000004, 48.01500000000001,<br>48.04250000000004, 48.07000000000001, 48.09750000000004,<br>48.12500000000001, 48.1525, 48.18000000000001, 48.2075,<br>48.23500000000001, 48.2625, 48.29000000000006, 48.31750000000001,<br>48.34500000000006, 48.37250000000001, 48.40000000000006,<br>48.42750000000001, 48.45500000000005, 48.48250000000001,<br>48.51000000000005, 48.53750000000001, 48.56500000000005,<br>48.59250000000001, 48.62000000000005, 48.64750000000001,<br>48.67500000000004, 48.70250000000001, 48.73000000000004,<br>48.75750000000001, 48.78500000000004, 48.81250000000001, 48.84,<br>48.86750000000001, 48.895, 48.92250000000001, 48.95000000000001,<br>48.97750000000006, 49.00500000000001, 49.03250000000006,<br>49.06000000000001, 49.08750000000006, 49.11500000000001,<br>49.14250000000005, 49.17000000000001, 49.19750000000005,<br>49.22500000000001, 49.25250000000005, 49.28000000000001,<br>49.30750000000005, 49.33500000000001, 49.36250000000004,<br>49.39000000000001, 49.41750000000004, 49.44500000000001,<br>49.47250000000004, 49.50000000000001, 49.5275, 49.55500000000001,<br>49.5825, 49.61000000000001, 49.63750000000001, 49.66500000000006,<br>49.69250000000001, 49.72000000000006, 49.74750000000001,<br>49.77500000000006, 49.80250000000001, 49.83000000000005,<br>49.85750000000001, 49.88500000000005, 49.91250000000001,<br>49.94000000000005, 49.96750000000001, 49.99500000000005,<br>50.02250000000001, 50.05000000000004, 50.07750000000001,<br>50.10500000000004, 50.13250000000001, 50.16000000000004,<br>50.18750000000001, 50.215, 50.24250000000001, 50.27,<br>50.29750000000001, 50.32500000000001, 50.35250000000006,<br>50.38000000000001, 50.40750000000006, 50.43500000000001,<br>50.46250000000006, 50.49000000000001, 50.51750000000005,<br>50.54500000000001, 50.57250000000005, 50.60000000000001,<br>50.62750000000005, 50.65500000000001, 50.68250000000005,<br>50.71000000000001, 50.73750000000004, 50.76500000000001,<br>50.79250000000004, 50.82000000000001, 50.84750000000004,<br>50.87500000000001, 50.9025, 50.93000000000001, 50.95750000000001, |

| Description | Value                                                                                                                                                                                                                                                                                                                                                                                                                                                                                                                                                                                                                                                                                                                                                                                                                                                                                                                                                                                                                                                                                                                                                                                                                                                                                                                                                                                                                                                                                                                                                                                                                                                                                                                                                                                                                                                                                                                                                                                                                                                                                                                                                                                                                                                                                                                                                                                                                                                                                                                                                                                                                                                                                                                                                                                                                                                                                                                                                                                                                |
|-------------|----------------------------------------------------------------------------------------------------------------------------------------------------------------------------------------------------------------------------------------------------------------------------------------------------------------------------------------------------------------------------------------------------------------------------------------------------------------------------------------------------------------------------------------------------------------------------------------------------------------------------------------------------------------------------------------------------------------------------------------------------------------------------------------------------------------------------------------------------------------------------------------------------------------------------------------------------------------------------------------------------------------------------------------------------------------------------------------------------------------------------------------------------------------------------------------------------------------------------------------------------------------------------------------------------------------------------------------------------------------------------------------------------------------------------------------------------------------------------------------------------------------------------------------------------------------------------------------------------------------------------------------------------------------------------------------------------------------------------------------------------------------------------------------------------------------------------------------------------------------------------------------------------------------------------------------------------------------------------------------------------------------------------------------------------------------------------------------------------------------------------------------------------------------------------------------------------------------------------------------------------------------------------------------------------------------------------------------------------------------------------------------------------------------------------------------------------------------------------------------------------------------------------------------------------------------------------------------------------------------------------------------------------------------------------------------------------------------------------------------------------------------------------------------------------------------------------------------------------------------------------------------------------------------------------------------------------------------------------------------------------------------------|
|             | 50.98500000000001, 51.01250000000001, 51.04000000000006,<br>51.06750000000001, 51.09500000000006, 51.12250000000001,<br>51.15000000000006, 51.17750000000001, 51.20500000000005,<br>51.23250000000001, 51.26000000000005, 51.28750000000001,<br>51.31500000000005, 51.34250000000001, 51.37000000000005,<br>51.39750000000001, 51.42500000000004, 51.45250000000001,<br>51.48000000000004, 51.50750000000001, 51.53500000000004,<br>51.56250000000001, 51.59, 51.61750000000001, 51.64500000000001,<br>51.67250000000001, 51.70000000000001, 51.72750000000006,<br>51.75500000000001, 51.78250000000006, 51.81000000000001,<br>51.83750000000006, 51.86500000000001, 51.89250000000005,<br>51.92000000000001, 51.94750000000005, 51.97500000000001,<br>52.00250000000005, 52.03000000000001, 52.05750000000005,<br>52.08500000000001, 52.11250000000004, 52.14000000000001,<br>52.16750000000004, 52.19500000000001, 52.22250000000004,<br>52.25000000000001, 52.2775, 52.30500000000001, 52.33250000000001,<br>52.36000000000001, 52.38750000000001, 52.41500000000006,<br>52.44250000000001, 52.47000000000006, 52.49750000000001,<br>52.52500000000006, 52.55250000000001, 52.58000000000005,<br>52.60750000000001, 52.63500000000005, 52.66250000000001,<br>52.69000000000005, 52.71750000000001, 52.74500000000005,<br>52.77250000000001, 52.80000000000004, 52.82750000000001,<br>52.85500000000004, 52.88250000000001, 52.91000000000004,<br>52.93750000000001, 52.965, 52.99250000000001, 53.02000000000001,<br>53.04750000000001, 53.07500000000001, 53.10250000000006,<br>53.13000000000001, 53.15750000000006, 53.18500000000001,<br>53.21250000000006, 53.24000000000001, 53.26750000000005,<br>53.29500000000001, 53.32250000000005, 53.35000000000001,<br>53.37750000000005, 53.40500000000001, 53.43250000000005,<br>53.46000000000001, 53.48750000000004, 53.51500000000001,<br>53.54250000000004, 53.57000000000001, 53.59750000000004,<br>53.62500000000001, 53.65250000000001, 53.68000000000001,<br>53.70750000000001, 53.73500000000001, 53.76250000000001,<br>53.79000000000006, 53.81750000000001, 53.84500000000006,<br>53.87250000000001, 53.90000000000006, 53.92750000000001,<br>53.95500000000005, 53.98250000000001, 54.01000000000005,<br>54.03750000000001, 54.06500000000005, 54.09250000000001,<br>54.12000000000005, 54.14750000000001, 54.17500000000004,<br>54.20250000000001, 54.23000000000004, 54.25750000000001,<br>54.28500000000004, 54.31250000000001, 54.34000000000001,<br>54.36750000000001, 54.39500000000001, 54.42250000000001,<br>54.45000000000001, 54.47750000000006, 54.50500000000001,<br>54.53250000000006, 54.56000000000001, 54.58750000000006,<br>54.61500000000001, 54.64250000000005, 54.67000000000001,<br>54.69750000000005, 54.72500000000001, 54.75250000000005,<br>54.78000000000001, 54.80750000000005, 54.83500000000001,<br>54.86250000000004, 54.89000000000001, 54.91750000000004,<br>54.94500000000001, 54.97250000000004, 55.00000000000001, |

| Description | Value                                                                                                                                                                                                                                                                                                                                                                                                                                                                                                                                                                                                                                                                                                                                                                                                                                                                                                                                                                                                                                                                                                                                                                                                                                                                                                                                                                                                                                                                                                                                                                                                                                                                                                                                                                                                                                                                                                                                                                                                                                                                                                                                                                                                                                                                                                                                                                                                                                                                                                                                                                                                                                                                                                                                                                                                                                                                                                                                                                                        |
|-------------|----------------------------------------------------------------------------------------------------------------------------------------------------------------------------------------------------------------------------------------------------------------------------------------------------------------------------------------------------------------------------------------------------------------------------------------------------------------------------------------------------------------------------------------------------------------------------------------------------------------------------------------------------------------------------------------------------------------------------------------------------------------------------------------------------------------------------------------------------------------------------------------------------------------------------------------------------------------------------------------------------------------------------------------------------------------------------------------------------------------------------------------------------------------------------------------------------------------------------------------------------------------------------------------------------------------------------------------------------------------------------------------------------------------------------------------------------------------------------------------------------------------------------------------------------------------------------------------------------------------------------------------------------------------------------------------------------------------------------------------------------------------------------------------------------------------------------------------------------------------------------------------------------------------------------------------------------------------------------------------------------------------------------------------------------------------------------------------------------------------------------------------------------------------------------------------------------------------------------------------------------------------------------------------------------------------------------------------------------------------------------------------------------------------------------------------------------------------------------------------------------------------------------------------------------------------------------------------------------------------------------------------------------------------------------------------------------------------------------------------------------------------------------------------------------------------------------------------------------------------------------------------------------------------------------------------------------------------------------------------------|
|             | 55.02750000000001, 55.05500000000001, 55.08250000000001,<br>55.11000000000001, 55.13750000000001, 55.16500000000006,<br>55.19250000000001, 55.22000000000006, 55.24750000000001,<br>55.27500000000006, 55.30250000000001, 55.33000000000005,<br>55.35750000000001, 55.38500000000005, 55.41250000000001,<br>55.44000000000005, 55.46750000000001, 55.49500000000005,<br>55.52250000000001, 55.55000000000004, 55.57750000000001,<br>55.60500000000004, 55.63250000000001, 55.66000000000001,<br>55.68750000000001, 55.71500000000001, 55.74250000000001,<br>55.77000000000001, 55.79750000000001, 55.82500000000001,<br>55.85250000000006, 55.88000000000001, 55.90750000000006,<br>55.93500000000001, 55.96250000000006, 55.99000000000001,<br>56.01750000000005, 56.04500000000001, 56.07250000000005,<br>56.10000000000001, 56.12750000000005, 56.15500000000001,<br>56.18250000000005, 56.21000000000001, 56.23750000000004,<br>56.26500000000001, 56.29250000000004, 56.32000000000001,<br>56.34750000000001, 56.37500000000001, 56.40250000000001,<br>56.43000000000001, 56.45750000000001, 56.48500000000001,<br>56.51250000000001, 56.54000000000006, 56.56750000000001,<br>56.59500000000006, 56.62250000000001, 56.65000000000006,<br>56.67750000000001, 56.70500000000005, 56.73250000000001,<br>56.76000000000005, 56.78750000000001, 56.81500000000005,<br>56.84250000000001, 56.87000000000005, 56.89750000000001,<br>56.92500000000004, 56.95250000000001, 56.98000000000004,<br>57.00750000000001, 57.03500000000001, 57.06250000000001,<br>57.09000000000001, 57.11750000000001, 57.14500000000001,<br>57.17250000000001, 57.20000000000001, 57.22750000000006,<br>57.25500000000001, 57.28250000000006, 57.31000000000001,<br>57.33750000000006, 57.36500000000001, 57.39250000000005,<br>57.42000000000001, 57.44750000000005, 57.47500000000001,<br>57.50250000000005, 57.53000000000001, 57.55750000000005,<br>57.58500000000001, 57.61250000000004, 57.64000000000001,<br>57.66750000000001, 57.69500000000001, 57.72250000000001,<br>57.75000000000001, 57.77750000000001, 57.80500000000001,<br>57.83250000000001, 57.86000000000001, 57.88750000000001,<br>57.91500000000006, 57.94250000000001, 57.97000000000006,<br>57.99750000000001, 58.02500000000006, 58.05250000000001,<br>58.08000000000005, 58.10750000000001, 58.13500000000005,<br>58.16250000000001, 58.19000000000005, 58.21750000000001,<br>58.24500000000005, 58.27250000000001, 58.30000000000004,<br>58.32750000000001, 58.35500000000001, 58.38250000000001,<br>58.41000000000001, 58.43750000000001, 58.46500000000001,<br>58.49250000000001, 58.52000000000001, 58.54750000000001,<br>58.57500000000001, 58.60250000000006, 58.63000000000001,<br>58.65750000000006, 58.68500000000001, 58.71250000000006,<br>58.74000000000001, 58.76750000000005, 58.79500000000001,<br>58.82250000000005, 58.85000000000001, 58.87750000000005,<br>58.90500000000001, 58.93250000000005, 58.96000000000001, |



| Description | Value                                                                                                                                                                                                                                                                                                                                                                                                                                                                                                                                                                                                                                                                                                                                                                                                                                                                                                                                                                                                                                                                                                                                                                                                                                                                                                                                                                                                                                                                                                                                                                                                                                                                                                                                                                                                                                                                                                                                                                                                                                                                                                                                                                                                                                                                                                                                                                                                                                                                                                                                                                                                                                                                                                                                                                                                                                                                                                                                                                                                                                                                                                                                        |
|-------------|----------------------------------------------------------------------------------------------------------------------------------------------------------------------------------------------------------------------------------------------------------------------------------------------------------------------------------------------------------------------------------------------------------------------------------------------------------------------------------------------------------------------------------------------------------------------------------------------------------------------------------------------------------------------------------------------------------------------------------------------------------------------------------------------------------------------------------------------------------------------------------------------------------------------------------------------------------------------------------------------------------------------------------------------------------------------------------------------------------------------------------------------------------------------------------------------------------------------------------------------------------------------------------------------------------------------------------------------------------------------------------------------------------------------------------------------------------------------------------------------------------------------------------------------------------------------------------------------------------------------------------------------------------------------------------------------------------------------------------------------------------------------------------------------------------------------------------------------------------------------------------------------------------------------------------------------------------------------------------------------------------------------------------------------------------------------------------------------------------------------------------------------------------------------------------------------------------------------------------------------------------------------------------------------------------------------------------------------------------------------------------------------------------------------------------------------------------------------------------------------------------------------------------------------------------------------------------------------------------------------------------------------------------------------------------------------------------------------------------------------------------------------------------------------------------------------------------------------------------------------------------------------------------------------------------------------------------------------------------------------------------------------------------------------------------------------------------------------------------------------------------------------|
|             | 58.987500000000004, 59.015000000000001, 59.042500000000001,<br>59.070000000000001, 59.097500000000001, 59.125000000000001,<br>59.152500000000001, 59.180000000000001, 59.207500000000001,<br>59.235000000000001, 59.262500000000001, 59.290000000000006,<br>59.317500000000001, 59.345000000000006, 59.372500000000001,<br>59.400000000000006, 59.427500000000001, 59.455000000000005,<br>59.482500000000001, 59.510000000000005, 59.537500000000001,<br>59.565000000000005, 59.592500000000001, 59.620000000000005,<br>59.647500000000001, 59.675000000000001, 59.702500000000001,<br>59.730000000000001, 59.757500000000001, 59.785000000000001,<br>59.812500000000001, 59.840000000000001, 59.867500000000001,<br>59.895000000000001, 59.922500000000001, 59.950000000000001,<br>59.977500000000006, 60.005000000000001, 60.032500000000006,<br>60.060000000000001, 60.087500000000006, 60.115000000000001,<br>60.142500000000005, 60.170000000000001, 60.197500000000005,<br>60.225000000000001, 60.252500000000005, 60.280000000000001,<br>60.307500000000005, 60.335000000000001, 60.362500000000001,<br>60.390000000000001, 60.417500000000001, 60.445000000000001,<br>60.472500000000001, 60.500000000000001, 60.527500000000001,<br>60.555000000000001, 60.582500000000001, 60.610000000000001,<br>60.637500000000001, 60.665000000000006, 60.692500000000001,<br>60.720000000000006, 60.747500000000001, 60.775000000000006,<br>60.802500000000001, 60.830000000000005, 60.857500000000001,<br>60.885000000000005, 60.912500000000001, 60.940000000000005,<br>60.967500000000001, 60.995000000000005, 61.022500000000001,<br>61.050000000000001, 61.077500000000001, 61.105000000000001,<br>61.132500000000001, 61.160000000000001, 61.187500000000001,<br>61.215000000000001, 61.242500000000001, 61.270000000000001,<br>61.297500000000001, 61.325000000000001, 61.352500000000006,<br>61.380000000000001, 61.407500000000006, 61.435000000000001,<br>61.462500000000006, 61.490000000000001, 61.517500000000005,<br>61.545000000000001, 61.572500000000005, 61.600000000000001,<br>61.627500000000005, 61.655000000000001, 61.682500000000005,<br>61.710000000000001, 61.737500000000001, 61.765000000000001,<br>61.792500000000001, 61.820000000000001, 61.847500000000001,<br>61.875000000000001, 61.902500000000001, 61.930000000000001,<br>61.957500000000001, 61.985000000000001, 62.012500000000001,<br>62.040000000000006, 62.067500000000001, 62.095000000000006,<br>62.122500000000001, 62.150000000000006, 62.177500000000001,<br>62.205000000000005, 62.232500000000001, 62.260000000000005,<br>62.287500000000001, 62.315000000000005, 62.342500000000001,<br>62.370000000000001, 62.397500000000001, 62.425000000000001,<br>62.452500000000001, 62.480000000000001, 62.507500000000001,<br>62.535000000000001, 62.562500000000001, 62.590000000000001,<br>62.617500000000001, 62.645000000000001, 62.672500000000001,<br>62.700000000000001, 62.727500000000006, 62.755000000000001,<br>62.782500000000006, 62.810000000000001, 62.837500000000006,<br>62.865000000000001, 62.892500000000005, 62.920000000000001, |

| Description | Value                                                                                                                                                                                                                                                                                                                                                                                                                                                                                                                                                                                                                                                                                                                                                                                                                                                                                                                                                                                                                                                                                                                                                                                                                                                                                                                                                                                                                                                                                                                                                                                                                                                                                                                                                                                                                                                                                                                                                                                                                                                                                                                                                                                                                                                                                                                                                                                                                                                                                                                                                                                                                                                                                                                                                                                                                                                                                                                                                                                                                                                                                                                                                                                                                                                                       |
|-------------|-----------------------------------------------------------------------------------------------------------------------------------------------------------------------------------------------------------------------------------------------------------------------------------------------------------------------------------------------------------------------------------------------------------------------------------------------------------------------------------------------------------------------------------------------------------------------------------------------------------------------------------------------------------------------------------------------------------------------------------------------------------------------------------------------------------------------------------------------------------------------------------------------------------------------------------------------------------------------------------------------------------------------------------------------------------------------------------------------------------------------------------------------------------------------------------------------------------------------------------------------------------------------------------------------------------------------------------------------------------------------------------------------------------------------------------------------------------------------------------------------------------------------------------------------------------------------------------------------------------------------------------------------------------------------------------------------------------------------------------------------------------------------------------------------------------------------------------------------------------------------------------------------------------------------------------------------------------------------------------------------------------------------------------------------------------------------------------------------------------------------------------------------------------------------------------------------------------------------------------------------------------------------------------------------------------------------------------------------------------------------------------------------------------------------------------------------------------------------------------------------------------------------------------------------------------------------------------------------------------------------------------------------------------------------------------------------------------------------------------------------------------------------------------------------------------------------------------------------------------------------------------------------------------------------------------------------------------------------------------------------------------------------------------------------------------------------------------------------------------------------------------------------------------------------------------------------------------------------------------------------------------------------------|
|             | 62.947500000000005, 62.975000000000001, 63.002500000000005,<br>63.030000000000001, 63.057500000000001, 63.085000000000001,<br>63.112500000000001, 63.140000000000001, 63.167500000000001,<br>63.195000000000001, 63.222500000000001, 63.250000000000001,<br>63.277500000000001, 63.305000000000001, 63.332500000000001,<br>63.360000000000001, 63.387500000000001, 63.415000000000006,<br>63.442500000000001, 63.470000000000006, 63.497500000000001,<br>63.525000000000006, 63.552500000000001, 63.580000000000005,<br>63.607500000000001, 63.635000000000005, 63.662500000000001,<br>63.690000000000005, 63.717500000000001, 63.745000000000001,<br>63.772500000000001, 63.800000000000001, 63.827500000000001,<br>63.855000000000001, 63.882500000000001, 63.910000000000001,<br>63.937500000000001, 63.965000000000001, 63.992500000000001,<br>64.020000000000001, 64.047500000000001, 64.075, 64.1025,<br>64.130000000000001, 64.157500000000001, 64.185, 64.2125,<br>64.240000000000001, 64.267500000000001, 64.295, 64.3225,<br>64.350000000000001, 64.377500000000001, 64.405000000000002, 64.4325,<br>64.460000000000001, 64.487500000000001, 64.515000000000001, 64.5425,<br>64.570000000000001, 64.597500000000001, 64.625000000000001, 64.6525,<br>64.68, 64.707500000000001, 64.735000000000001, 64.7625, 64.79,<br>64.817500000000001, 64.845000000000001, 64.8725, 64.9,<br>64.927500000000001, 64.955000000000001, 64.9825, 65.01,<br>65.037500000000001, 65.065000000000001, 65.092500000000002, 65.12,<br>65.147500000000001, 65.175000000000001, 65.202500000000001, 65.23,<br>65.257500000000001, 65.285000000000001, 65.312500000000001, 65.34,<br>65.3675, 65.395000000000001, 65.422500000000001, 65.45, 65.4775,<br>65.505000000000001, 65.532500000000001, 65.56, 65.5875,<br>65.615000000000001, 65.642500000000001, 65.67, 65.6975,<br>65.725000000000001, 65.752500000000001, 65.780000000000002, 65.8075,<br>65.835000000000001, 65.862500000000001, 65.890000000000001, 65.9175,<br>65.945000000000001, 65.972500000000001, 66.000000000000001, 66.0275,<br>66.055, 66.082500000000001, 66.110000000000001, 66.1375, 66.165,<br>66.192500000000001, 66.220000000000001, 66.2475, 66.275,<br>66.302500000000001, 66.330000000000001, 66.3575, 66.385,<br>66.412500000000001, 66.440000000000001, 66.467500000000002, 66.495,<br>66.522500000000001, 66.550000000000001, 66.577500000000001, 66.605,<br>66.632500000000001, 66.660000000000001, 66.687500000000001, 66.715,<br>66.7425, 66.770000000000001, 66.797500000000001, 66.825, 66.8525,<br>66.880000000000001, 66.907500000000001, 66.935, 66.9625,<br>66.990000000000001, 67.017500000000001, 67.045, 67.0725,<br>67.100000000000001, 67.127500000000001, 67.155000000000002, 67.1825,<br>67.210000000000001, 67.237500000000001, 67.265000000000001, 67.2925,<br>67.320000000000001, 67.347500000000001, 67.375000000000001, 67.4025,<br>67.43, 67.457500000000001, 67.485000000000001, 67.5125, 67.54,<br>67.567500000000001, 67.595000000000001, 67.6225, 67.65,<br>67.677500000000001, 67.705000000000001, 67.732500000000002, 67.76,<br>67.787500000000001, 67.815000000000001, 67.842500000000002, 67.87,<br>67.897500000000001, 67.925000000000001, 67.952500000000001, 67.98, |

| Description | Value                                                                                                                                                                                                                                                                                                                                                                                                                                                                                                                                                                                                                                                                                                                                                                                                                                                                                                                                                                                                                                                                                                                                                                                                                                                                                                                                                                                                                                                                                                                                                                                                                                                                                                                                                                                                                                                                                                                                                                                                                                                                                                                                                                                                                                                                                                                                                                                                                                                                                                                                                                                                                                                                                                                                                                                                                                                                                                                                                                                                                                                                                                                                                                                                                                                                                                                       |
|-------------|-----------------------------------------------------------------------------------------------------------------------------------------------------------------------------------------------------------------------------------------------------------------------------------------------------------------------------------------------------------------------------------------------------------------------------------------------------------------------------------------------------------------------------------------------------------------------------------------------------------------------------------------------------------------------------------------------------------------------------------------------------------------------------------------------------------------------------------------------------------------------------------------------------------------------------------------------------------------------------------------------------------------------------------------------------------------------------------------------------------------------------------------------------------------------------------------------------------------------------------------------------------------------------------------------------------------------------------------------------------------------------------------------------------------------------------------------------------------------------------------------------------------------------------------------------------------------------------------------------------------------------------------------------------------------------------------------------------------------------------------------------------------------------------------------------------------------------------------------------------------------------------------------------------------------------------------------------------------------------------------------------------------------------------------------------------------------------------------------------------------------------------------------------------------------------------------------------------------------------------------------------------------------------------------------------------------------------------------------------------------------------------------------------------------------------------------------------------------------------------------------------------------------------------------------------------------------------------------------------------------------------------------------------------------------------------------------------------------------------------------------------------------------------------------------------------------------------------------------------------------------------------------------------------------------------------------------------------------------------------------------------------------------------------------------------------------------------------------------------------------------------------------------------------------------------------------------------------------------------------------------------------------------------------------------------------------------------|
|             | 68.00750000000001, 68.03500000000001, 68.06250000000001, 68.09,<br>68.1175, 68.14500000000001, 68.17250000000001, 68.2, 68.2275,<br>68.25500000000001, 68.28250000000001, 68.31, 68.3375,<br>68.36500000000001, 68.39250000000001, 68.42000000000002, 68.4475,<br>68.47500000000001, 68.50250000000001, 68.53000000000002, 68.5575,<br>68.58500000000001, 68.61250000000001, 68.64000000000001, 68.6675,<br>68.69500000000001, 68.72250000000001, 68.75000000000001, 68.7775,<br>68.805, 68.83250000000001, 68.86000000000001, 68.8875, 68.915,<br>68.94250000000001, 68.97000000000001, 68.9975, 69.025,<br>69.05250000000001, 69.08000000000001, 69.10750000000002, 69.135,<br>69.16250000000001, 69.19000000000001, 69.21750000000002, 69.245,<br>69.27250000000001, 69.30000000000001, 69.32750000000001, 69.355,<br>69.38250000000001, 69.41000000000001, 69.43750000000001, 69.465,<br>69.4925, 69.52000000000001, 69.54750000000001, 69.575, 69.6025,<br>69.63000000000001, 69.65750000000001, 69.685, 69.7125,<br>69.74000000000001, 69.76750000000001, 69.79500000000002, 69.8225,<br>69.85000000000001, 69.87750000000001, 69.90500000000002, 69.9325,<br>69.96000000000001, 69.98750000000001, 70.01500000000001, 70.0425,<br>70.07000000000001, 70.09750000000001, 70.12500000000001, 70.1525,<br>70.18, 70.20750000000001, 70.23500000000001, 70.2625, 70.29,<br>70.31750000000001, 70.34500000000001, 70.3725, 70.4,<br>70.42750000000001, 70.45500000000001, 70.48250000000002, 70.51,<br>70.53750000000001, 70.56500000000001, 70.59250000000002, 70.62,<br>70.64750000000001, 70.67500000000001, 70.70250000000001, 70.73,<br>70.75750000000001, 70.78500000000001, 70.81250000000001, 70.84,<br>70.8675, 70.89500000000001, 70.92250000000001, 70.95, 70.9775,<br>71.00500000000001, 71.03250000000001, 71.06, 71.0875,<br>71.11500000000001, 71.14250000000001, 71.17000000000002, 71.1975,<br>71.22500000000001, 71.25250000000001, 71.28000000000002, 71.3075,<br>71.33500000000001, 71.36250000000001, 71.39000000000001, 71.4175,<br>71.44500000000001, 71.47250000000001, 71.50000000000001, 71.5275,<br>71.555, 71.58250000000001, 71.61000000000001, 71.6375, 71.665,<br>71.69250000000001, 71.72000000000001, 71.74750000000002, 71.775,<br>71.80250000000001, 71.83000000000001, 71.85750000000002, 71.885,<br>71.91250000000001, 71.94000000000001, 71.96750000000002, 71.995,<br>72.02250000000001, 72.05000000000001, 72.07750000000001, 72.105,<br>72.13250000000001, 72.16000000000001, 72.18750000000001, 72.215,<br>72.2425, 72.27000000000001, 72.29750000000001, 72.325, 72.3525,<br>72.38000000000001, 72.40750000000001, 72.43500000000002, 72.4625,<br>72.49000000000001, 72.51750000000001, 72.54500000000002, 72.5725,<br>72.60000000000001, 72.62750000000001, 72.65500000000002, 72.6825,<br>72.71000000000001, 72.73750000000001, 72.76500000000001, 72.7925,<br>72.82000000000001, 72.84750000000001, 72.87500000000001, 72.9025,<br>72.93, 72.95750000000001, 72.98500000000001, 73.0125, 73.04,<br>73.06750000000001, 73.09500000000001, 73.12250000000002, 73.15,<br>73.17750000000001, 73.20500000000001, 73.23250000000002, 73.26,<br>73.28750000000001, 73.31500000000001, 73.34250000000002, 73.37,<br>73.39750000000001, 73.42500000000001, 73.45250000000001, 73.48, |

| Description | Value                                                                                                                                                                                                                                                                                                                                                                                                                                                                                                                                                                                                                                                                                                                                                                                                                                                                                                                                                                                                                                                                                                                                                                                                                                                                                                                                                                                                                                                                                                                                                                                                                                                                                                                                                                                                                                                                                                                                                                                                                                                                                                                                                                                                                                                                                                                                                                                                                                                                                                                                                                                                                                                                                                                                                                                                                                                                                                                                                                                                                                                                                                                                                                                                                                                                                                                                                         |
|-------------|---------------------------------------------------------------------------------------------------------------------------------------------------------------------------------------------------------------------------------------------------------------------------------------------------------------------------------------------------------------------------------------------------------------------------------------------------------------------------------------------------------------------------------------------------------------------------------------------------------------------------------------------------------------------------------------------------------------------------------------------------------------------------------------------------------------------------------------------------------------------------------------------------------------------------------------------------------------------------------------------------------------------------------------------------------------------------------------------------------------------------------------------------------------------------------------------------------------------------------------------------------------------------------------------------------------------------------------------------------------------------------------------------------------------------------------------------------------------------------------------------------------------------------------------------------------------------------------------------------------------------------------------------------------------------------------------------------------------------------------------------------------------------------------------------------------------------------------------------------------------------------------------------------------------------------------------------------------------------------------------------------------------------------------------------------------------------------------------------------------------------------------------------------------------------------------------------------------------------------------------------------------------------------------------------------------------------------------------------------------------------------------------------------------------------------------------------------------------------------------------------------------------------------------------------------------------------------------------------------------------------------------------------------------------------------------------------------------------------------------------------------------------------------------------------------------------------------------------------------------------------------------------------------------------------------------------------------------------------------------------------------------------------------------------------------------------------------------------------------------------------------------------------------------------------------------------------------------------------------------------------------------------------------------------------------------------------------------------------------------|
|             | 73.50750000000001, 73.53500000000001, 73.56250000000001, 73.59,<br>73.6175, 73.64500000000001, 73.67250000000001, 73.7, 73.7275,<br>73.75500000000001, 73.78250000000001, 73.81000000000002, 73.8375,<br>73.86500000000001, 73.89250000000001, 73.92000000000002, 73.9475,<br>73.97500000000001, 74.00250000000001, 74.03000000000002, 74.0575,<br>74.08500000000001, 74.11250000000001, 74.14000000000001, 74.1675,<br>74.19500000000001, 74.22250000000001, 74.25000000000001, 74.2775,<br>74.305, 74.33250000000001, 74.36000000000001, 74.3875, 74.415,<br>74.44250000000001, 74.47000000000001, 74.49750000000002, 74.525,<br>74.55250000000001, 74.58000000000001, 74.60750000000002, 74.635,<br>74.66250000000001, 74.69000000000001, 74.71750000000002, 74.745,<br>74.77250000000001, 74.80000000000001, 74.82750000000001, 74.855,<br>74.88250000000001, 74.91000000000001, 74.93750000000001, 74.965,<br>74.9925, 75.02000000000001, 75.04750000000001, 75.075, 75.1025,<br>75.13000000000001, 75.15750000000001, 75.18500000000002, 75.2125,<br>75.24000000000001, 75.26750000000001, 75.29500000000002, 75.3225,<br>75.35000000000001, 75.37750000000001, 75.40500000000002, 75.4325,<br>75.46000000000001, 75.48750000000001, 75.51500000000001, 75.5425,<br>75.57000000000001, 75.59750000000001, 75.62500000000001, 75.6525,<br>75.68, 75.70750000000001, 75.73500000000001, 75.7625, 75.79,<br>75.81750000000001, 75.84500000000001, 75.87250000000002, 75.9,<br>75.92750000000001, 75.95500000000001, 75.98250000000002, 76.01,<br>76.03750000000001, 76.06500000000001, 76.09250000000002, 76.12,<br>76.14750000000001, 76.17500000000001, 76.20250000000001, 76.23,<br>76.25750000000001, 76.28500000000001, 76.31250000000001, 76.34,<br>76.3675, 76.39500000000001, 76.42250000000001, 76.45000000000002,<br>76.4775, 76.50500000000001, 76.53250000000001, 76.56000000000002,<br>76.5875, 76.61500000000001, 76.64250000000001, 76.67000000000002,<br>76.6975, 76.72500000000001, 76.75250000000001, 76.78000000000002,<br>76.8075, 76.83500000000001, 76.86250000000001, 76.89000000000001,<br>76.9175, 76.94500000000001, 76.97250000000001, 77.00000000000001,<br>77.0275, 77.055, 77.08250000000001, 77.11000000000001,<br>77.13750000000002, 77.165, 77.19250000000001, 77.22000000000001,<br>77.24750000000002, 77.275, 77.30250000000001, 77.33000000000001,<br>77.35750000000002, 77.385, 77.41250000000001, 77.44000000000001,<br>77.46750000000002, 77.495, 77.52250000000001, 77.55000000000001,<br>77.57750000000001, 77.605, 77.63250000000001, 77.66000000000001,<br>77.68750000000001, 77.715, 77.7425, 77.77000000000001,<br>77.79750000000001, 77.82500000000002, 77.8525, 77.88000000000001,<br>77.90750000000001, 77.93500000000002, 77.9625, 77.99000000000001,<br>78.01750000000001, 78.04500000000002, 78.0725, 78.10000000000001,<br>78.12750000000001, 78.15500000000002, 78.1825, 78.21000000000001,<br>78.23750000000001, 78.26500000000001, 78.2925, 78.32000000000001,<br>78.34750000000001, 78.37500000000001, 78.4025, 78.43,<br>78.45750000000001, 78.48500000000001, 78.51250000000002, 78.54,<br>78.56750000000001, 78.59500000000001, 78.62250000000002, 78.65,<br>78.67750000000001, 78.70500000000001, 78.73250000000002, 78.76,<br>78.78750000000001, 78.81500000000001, 78.84250000000002, 78.87, |

| Description | Value                                                                                                                                                                                                                                                                                                                                                                                                                                                                                                                                                                                                                                                                                                                                                                                                                                                                                                                                                                                                                                                                                                                                                                                                                                                                                                                                                                                                                                                                                                                                                                                                                                                                                                                                                                                                                                                                                                                                                                                                                                                                                                                                                                                                                                                                                                                                                                                                                                                                                                                                                                                                                                                                                                                                                                                                                                                                                                                                                                                                                                                                                                                                                                                                                                                                                                                                                                           |
|-------------|---------------------------------------------------------------------------------------------------------------------------------------------------------------------------------------------------------------------------------------------------------------------------------------------------------------------------------------------------------------------------------------------------------------------------------------------------------------------------------------------------------------------------------------------------------------------------------------------------------------------------------------------------------------------------------------------------------------------------------------------------------------------------------------------------------------------------------------------------------------------------------------------------------------------------------------------------------------------------------------------------------------------------------------------------------------------------------------------------------------------------------------------------------------------------------------------------------------------------------------------------------------------------------------------------------------------------------------------------------------------------------------------------------------------------------------------------------------------------------------------------------------------------------------------------------------------------------------------------------------------------------------------------------------------------------------------------------------------------------------------------------------------------------------------------------------------------------------------------------------------------------------------------------------------------------------------------------------------------------------------------------------------------------------------------------------------------------------------------------------------------------------------------------------------------------------------------------------------------------------------------------------------------------------------------------------------------------------------------------------------------------------------------------------------------------------------------------------------------------------------------------------------------------------------------------------------------------------------------------------------------------------------------------------------------------------------------------------------------------------------------------------------------------------------------------------------------------------------------------------------------------------------------------------------------------------------------------------------------------------------------------------------------------------------------------------------------------------------------------------------------------------------------------------------------------------------------------------------------------------------------------------------------------------------------------------------------------------------------------------------------------|
|             | 78.89750000000001, 78.92500000000001, 78.95250000000001, 78.98,<br>79.00750000000001, 79.03500000000001, 79.06250000000001, 79.09,<br>79.1175, 79.14500000000001, 79.17250000000001, 79.20000000000002,<br>79.2275, 79.25500000000001, 79.28250000000001, 79.31000000000002,<br>79.3375, 79.36500000000001, 79.39250000000001, 79.42000000000002,<br>79.4475, 79.47500000000001, 79.50250000000001, 79.53000000000002,<br>79.5575, 79.58500000000001, 79.61250000000001, 79.64000000000001,<br>79.6675, 79.69500000000001, 79.72250000000001, 79.75000000000001,<br>79.7775, 79.805, 79.83250000000001, 79.86000000000001,<br>79.88750000000002, 79.915, 79.94250000000001, 79.97000000000001,<br>79.99750000000002, 80.025, 80.05250000000001, 80.08000000000001,<br>80.10750000000002, 80.135, 80.16250000000001, 80.19000000000001,<br>80.21750000000002, 80.245, 80.27250000000001, 80.30000000000001,<br>80.32750000000001, 80.355, 80.38250000000001, 80.41000000000001,<br>80.43750000000001, 80.46500000000002, 80.4925, 80.52000000000001,<br>80.54750000000001, 80.57500000000002, 80.6025, 80.63000000000001,<br>80.65750000000001, 80.68500000000002, 80.7125, 80.74000000000001,<br>80.76750000000001, 80.79500000000002, 80.8225, 80.85000000000001,<br>80.87750000000001, 80.90500000000002, 80.9325, 80.96000000000001,<br>80.98750000000001, 81.01500000000001, 81.0425, 81.07000000000001,<br>81.09750000000001, 81.12500000000001, 81.15250000000002, 81.18,<br>81.20750000000001, 81.23500000000001, 81.26250000000002, 81.29,<br>81.31750000000001, 81.34500000000001, 81.37250000000002, 81.4,<br>81.42750000000001, 81.45500000000001, 81.48250000000002, 81.51,<br>81.53750000000001, 81.56500000000001, 81.59250000000002, 81.62,<br>81.64750000000001, 81.67500000000001, 81.70250000000001, 81.73,<br>81.75750000000001, 81.78500000000001, 81.81250000000001,<br>81.84000000000002, 81.8675, 81.89500000000001, 81.92250000000001,<br>81.95000000000002, 81.9775, 82.00500000000001, 82.03250000000001,<br>82.06000000000002, 82.0875, 82.11500000000001, 82.14250000000001,<br>82.17000000000002, 82.1975, 82.22500000000001, 82.25250000000001,<br>82.28000000000002, 82.3075, 82.33500000000001, 82.36250000000001,<br>82.39000000000001, 82.4175, 82.44500000000001, 82.47250000000001,<br>82.50000000000001, 82.52750000000002, 82.555, 82.58250000000001,<br>82.61000000000001, 82.63750000000002, 82.665, 82.69250000000001,<br>82.72000000000001, 82.74750000000002, 82.775, 82.80250000000001,<br>82.83000000000001, 82.85750000000002, 82.885, 82.91250000000001,<br>82.94000000000001, 82.96750000000002, 82.995, 83.02250000000001,<br>83.05000000000001, 83.07750000000001, 83.105, 83.13250000000001,<br>83.16000000000001, 83.18750000000001, 83.21500000000002, 83.2425,<br>83.27000000000001, 83.29750000000001, 83.32500000000002, 83.3525,<br>83.38000000000001, 83.40750000000001, 83.43500000000002, 83.4625,<br>83.49000000000001, 83.51750000000001, 83.54500000000002, 83.5725,<br>83.60000000000001, 83.62750000000001, 83.65500000000002, 83.6825,<br>83.71000000000001, 83.73750000000001, 83.76500000000001, 83.7925,<br>83.82000000000001, 83.84750000000001, 83.87500000000001,<br>83.90250000000002, 83.93, 83.95750000000001, 83.98500000000001,<br>84.01250000000002, 84.04, 84.06750000000001, 84.09500000000001, |

| Description | Value                                                                                                                                                                                                                                                                                                                                                                                                                                                                                                                                                                                                                                                                                                                                                                                                                                                                                                                                                                                                                                                                                                                                                                                                                                                                                                                                                                                                                                                                                                                                                                                                                                                                                                                                                                                                                                                                                                                                                                                                                                                                                                                                                                                                                                                                                                                                                                                                                                                                                                                                                                                                                                                                                                                                                                                                                                                                                                                                                                                                                                                                                                                                                                                                                                                                                                          |
|-------------|----------------------------------------------------------------------------------------------------------------------------------------------------------------------------------------------------------------------------------------------------------------------------------------------------------------------------------------------------------------------------------------------------------------------------------------------------------------------------------------------------------------------------------------------------------------------------------------------------------------------------------------------------------------------------------------------------------------------------------------------------------------------------------------------------------------------------------------------------------------------------------------------------------------------------------------------------------------------------------------------------------------------------------------------------------------------------------------------------------------------------------------------------------------------------------------------------------------------------------------------------------------------------------------------------------------------------------------------------------------------------------------------------------------------------------------------------------------------------------------------------------------------------------------------------------------------------------------------------------------------------------------------------------------------------------------------------------------------------------------------------------------------------------------------------------------------------------------------------------------------------------------------------------------------------------------------------------------------------------------------------------------------------------------------------------------------------------------------------------------------------------------------------------------------------------------------------------------------------------------------------------------------------------------------------------------------------------------------------------------------------------------------------------------------------------------------------------------------------------------------------------------------------------------------------------------------------------------------------------------------------------------------------------------------------------------------------------------------------------------------------------------------------------------------------------------------------------------------------------------------------------------------------------------------------------------------------------------------------------------------------------------------------------------------------------------------------------------------------------------------------------------------------------------------------------------------------------------------------------------------------------------------------------------------------------------|
|             | 84.12250000000002, 84.15, 84.17750000000001, 84.20500000000001,<br>84.23250000000002, 84.26, 84.28750000000001, 84.31500000000001,<br>84.34250000000002, 84.37, 84.39750000000001, 84.42500000000001,<br>84.45250000000001, 84.48000000000002, 84.50750000000001,<br>84.53500000000001, 84.56250000000001, 84.59000000000002, 84.6175,<br>84.64500000000001, 84.67250000000001, 84.70000000000002, 84.7275,<br>84.75500000000001, 84.78250000000001, 84.81000000000002, 84.8375,<br>84.86500000000001, 84.89250000000001, 84.92000000000002, 84.9475,<br>84.97500000000001, 85.00250000000001, 85.03000000000002, 85.0575,<br>85.08500000000001, 85.11250000000001, 85.14000000000001,<br>85.16750000000002, 85.19500000000001, 85.22250000000001,<br>85.25000000000001, 85.27750000000002, 85.305, 85.33250000000001,<br>85.36000000000001, 85.38750000000002, 85.415, 85.44250000000001,<br>85.47000000000001, 85.49750000000002, 85.525, 85.55250000000001,<br>85.58000000000001, 85.60750000000002, 85.635, 85.66250000000001,<br>85.69000000000001, 85.71750000000002, 85.745, 85.77250000000001,<br>85.80000000000001, 85.82750000000001, 85.85500000000002,<br>85.88250000000001, 85.91000000000001, 85.93750000000001,<br>85.96500000000002, 85.9925, 86.02000000000001, 86.04750000000001,<br>86.07500000000002, 86.1025, 86.13000000000001, 86.15750000000001,<br>86.18500000000002, 86.2125, 86.24000000000001, 86.26750000000001,<br>86.29500000000002, 86.3225, 86.35000000000001, 86.37750000000001,<br>86.40500000000002, 86.4325, 86.46000000000001, 86.48750000000001,<br>86.51500000000001, 86.54250000000002, 86.57000000000001,<br>86.59750000000001, 86.62500000000001, 86.65250000000002, 86.68,<br>86.70750000000001, 86.73500000000001, 86.76250000000002, 86.79,<br>86.81750000000001, 86.84500000000001, 86.87250000000002, 86.9,<br>86.92750000000001, 86.95500000000001, 86.98250000000002, 87.01,<br>87.03750000000001, 87.06500000000001, 87.09250000000002, 87.12,<br>87.14750000000001, 87.17500000000001, 87.20250000000001,<br>87.23000000000002, 87.25750000000001, 87.28500000000001,<br>87.31250000000001, 87.34000000000002, 87.3675, 87.39500000000001,<br>87.42250000000001, 87.45000000000002, 87.4775, 87.50500000000001,<br>87.53250000000001, 87.56000000000002, 87.5875, 87.61500000000001,<br>87.64250000000001, 87.67000000000002, 87.6975, 87.72500000000001,<br>87.75250000000001, 87.78000000000002, 87.8075, 87.83500000000001,<br>87.86250000000001, 87.89000000000001, 87.91750000000002,<br>87.94500000000001, 87.97250000000001, 88.00000000000001,<br>88.02750000000002, 88.055, 88.08250000000001, 88.11000000000001,<br>88.13750000000002, 88.165, 88.19250000000001, 88.22000000000001,<br>88.24750000000002, 88.275, 88.30250000000001, 88.33000000000001,<br>88.35750000000002, 88.385, 88.41250000000001, 88.44000000000001,<br>88.46750000000002, 88.495, 88.52250000000001, 88.55000000000001,<br>88.57750000000001, 88.60500000000002, 88.63250000000001,<br>88.66000000000001, 88.68750000000001, 88.71500000000002, 88.7425,<br>88.77000000000001, 88.79750000000001, 88.82500000000002, 88.8525,<br>88.88000000000001, 88.90750000000001, 88.93500000000002, 88.9625,<br>88.99000000000001, 89.01750000000001, 89.04500000000002, 89.0725, |

| Description | Value                                                                                                                                                                                                                                                                                                                                                                                                                                                                                                                                                                                                                                                                                                                                                                                                                                                                                                                                                                                                                                                                                                                                                                                                                                                                                                                                                                                                                                                                                                                                                                                                                                                                                                                                                                                                                                                                                                                                                                                                                                                                                                                                                                                                                                                                                                                                                                                                                                                                                                                                                                                                                                                                                                                                                                                                                                                                                                                                                                                                                                                                                                                                                                                                  |
|-------------|--------------------------------------------------------------------------------------------------------------------------------------------------------------------------------------------------------------------------------------------------------------------------------------------------------------------------------------------------------------------------------------------------------------------------------------------------------------------------------------------------------------------------------------------------------------------------------------------------------------------------------------------------------------------------------------------------------------------------------------------------------------------------------------------------------------------------------------------------------------------------------------------------------------------------------------------------------------------------------------------------------------------------------------------------------------------------------------------------------------------------------------------------------------------------------------------------------------------------------------------------------------------------------------------------------------------------------------------------------------------------------------------------------------------------------------------------------------------------------------------------------------------------------------------------------------------------------------------------------------------------------------------------------------------------------------------------------------------------------------------------------------------------------------------------------------------------------------------------------------------------------------------------------------------------------------------------------------------------------------------------------------------------------------------------------------------------------------------------------------------------------------------------------------------------------------------------------------------------------------------------------------------------------------------------------------------------------------------------------------------------------------------------------------------------------------------------------------------------------------------------------------------------------------------------------------------------------------------------------------------------------------------------------------------------------------------------------------------------------------------------------------------------------------------------------------------------------------------------------------------------------------------------------------------------------------------------------------------------------------------------------------------------------------------------------------------------------------------------------------------------------------------------------------------------------------------------------|
|             | 89.10000000000001, 89.12750000000001, 89.15500000000002,<br>89.18250000000002, 89.21000000000001, 89.23750000000001,<br>89.26500000000001, 89.29250000000002, 89.32000000000001,<br>89.34750000000001, 89.37500000000001, 89.40250000000002, 89.43,<br>89.45750000000001, 89.48500000000001, 89.51250000000002, 89.54,<br>89.56750000000001, 89.59500000000001, 89.62250000000002, 89.65,<br>89.67750000000001, 89.70500000000001, 89.73250000000002, 89.76,<br>89.78750000000001, 89.81500000000001, 89.84250000000002,<br>89.87000000000002, 89.89750000000001, 89.92500000000001,<br>89.95250000000001, 89.98000000000002, 90.00750000000001,<br>90.03500000000001, 90.06250000000001, 90.09000000000002, 90.1175,<br>90.14500000000001, 90.17250000000001, 90.20000000000002, 90.2275,<br>90.25500000000001, 90.28250000000001, 90.31000000000002, 90.3375,<br>90.36500000000001, 90.39250000000001, 90.42000000000002, 90.4475,<br>90.47500000000001, 90.50250000000001, 90.53000000000002,<br>90.55750000000002, 90.58500000000001, 90.61250000000001,<br>90.64000000000001, 90.66750000000002, 90.69500000000001,<br>90.72250000000001, 90.75000000000001, 90.77750000000002, 90.805,<br>90.83250000000001, 90.86000000000001, 90.88750000000002, 90.915,<br>90.94250000000001, 90.97000000000001, 90.99750000000002, 91.025,<br>91.05250000000001, 91.08000000000001, 91.10750000000002, 91.135,<br>91.16250000000001, 91.19000000000001, 91.21750000000002,<br>91.24500000000002, 91.27250000000001, 91.30000000000001,<br>91.32750000000001, 91.35500000000002, 91.38250000000001,<br>91.41000000000001, 91.43750000000001, 91.46500000000002, 91.4925,<br>91.52000000000001, 91.54750000000001, 91.57500000000002, 91.6025,<br>91.63000000000001, 91.65750000000001, 91.68500000000002, 91.7125,<br>91.74000000000001, 91.76750000000001, 91.79500000000002, 91.8225,<br>91.85000000000001, 91.87750000000001, 91.90500000000002,<br>91.93250000000002, 91.96000000000001, 91.98750000000001,<br>92.01500000000001, 92.04250000000002, 92.07000000000001,<br>92.09750000000001, 92.12500000000001, 92.15250000000002, 92.18,<br>92.20750000000001, 92.23500000000001, 92.26250000000002, 92.29,<br>92.31750000000001, 92.34500000000001, 92.37250000000002, 92.4,<br>92.42750000000001, 92.45500000000001, 92.48250000000002, 92.51,<br>92.53750000000001, 92.56500000000001, 92.59250000000002,<br>92.62000000000002, 92.64750000000001, 92.67500000000001,<br>92.70250000000001, 92.73000000000002, 92.75750000000001,<br>92.78500000000001, 92.81250000000001, 92.84000000000002, 92.8675,<br>92.89500000000001, 92.92250000000001, 92.95000000000002, 92.9775,<br>93.00500000000001, 93.03250000000001, 93.06000000000002, 93.0875,<br>93.11500000000001, 93.14250000000001, 93.17000000000002,<br>93.19750000000002, 93.22500000000001, 93.25250000000001,<br>93.28000000000002, 93.30750000000002, 93.33500000000001,<br>93.36250000000001, 93.39000000000001, 93.41750000000002,<br>93.44500000000001, 93.47250000000001, 93.50000000000001,<br>93.52750000000002, 93.555, 93.58250000000001, 93.61000000000001,<br>93.63750000000002, 93.665, 93.69250000000001, 93.72000000000001, |

| Description | Value                                                                                                                                                                                                                                                                                                                                                                                                                                                                                                                                                                                                                                                                                                                                                                                                                                                                                                                                                                                                                                                                                                                                                                                                                                                                                                                                                                                                                                                                                                                                                                                                                                                                                                                                                                                                                                                                                                                                                                                                                                                                                                                                                                                                                                                                                                                                                                                                                                                                                                                                                                                                                                                                                                                                                                                                                                                                                                                                                                                                                                                                                                                                            |
|-------------|--------------------------------------------------------------------------------------------------------------------------------------------------------------------------------------------------------------------------------------------------------------------------------------------------------------------------------------------------------------------------------------------------------------------------------------------------------------------------------------------------------------------------------------------------------------------------------------------------------------------------------------------------------------------------------------------------------------------------------------------------------------------------------------------------------------------------------------------------------------------------------------------------------------------------------------------------------------------------------------------------------------------------------------------------------------------------------------------------------------------------------------------------------------------------------------------------------------------------------------------------------------------------------------------------------------------------------------------------------------------------------------------------------------------------------------------------------------------------------------------------------------------------------------------------------------------------------------------------------------------------------------------------------------------------------------------------------------------------------------------------------------------------------------------------------------------------------------------------------------------------------------------------------------------------------------------------------------------------------------------------------------------------------------------------------------------------------------------------------------------------------------------------------------------------------------------------------------------------------------------------------------------------------------------------------------------------------------------------------------------------------------------------------------------------------------------------------------------------------------------------------------------------------------------------------------------------------------------------------------------------------------------------------------------------------------------------------------------------------------------------------------------------------------------------------------------------------------------------------------------------------------------------------------------------------------------------------------------------------------------------------------------------------------------------------------------------------------------------------------------------------------------------|
|             | 93.74750000000002, 93.775, 93.80250000000001, 93.83000000000001,<br>93.85750000000002, 93.88500000000002, 93.91250000000001,<br>93.94000000000001, 93.96750000000002, 93.99500000000002,<br>94.02250000000001, 94.05000000000001, 94.07750000000001,<br>94.10500000000002, 94.13250000000001, 94.16000000000001,<br>94.18750000000001, 94.21500000000002, 94.2425, 94.27000000000001,<br>94.29750000000001, 94.32500000000002, 94.3525, 94.38000000000001,<br>94.40750000000001, 94.43500000000002, 94.4625, 94.49000000000001,<br>94.51750000000001, 94.54500000000002, 94.57250000000002,<br>94.60000000000001, 94.62750000000001, 94.65500000000002,<br>94.68250000000002, 94.71000000000001, 94.73750000000001,<br>94.76500000000001, 94.79250000000002, 94.82000000000001,<br>94.84750000000001, 94.87500000000001, 94.90250000000002, 94.93,<br>94.95750000000001, 94.98500000000001, 95.01250000000002, 95.04,<br>95.06750000000001, 95.09500000000001, 95.12250000000002, 95.15,<br>95.17750000000001, 95.20500000000001, 95.23250000000002,<br>95.26000000000002, 95.28750000000001, 95.31500000000001,<br>95.34250000000002, 95.37000000000002, 95.39750000000001,<br>95.42500000000001, 95.45250000000001, 95.48000000000002,<br>95.50750000000001, 95.53500000000001, 95.56250000000001,<br>95.59000000000002, 95.6175, 95.64500000000001, 95.67250000000001,<br>95.70000000000002, 95.7275, 95.75500000000001, 95.78250000000001,<br>95.81000000000002, 95.8375, 95.86500000000001, 95.89250000000001,<br>95.92000000000002, 95.94750000000002, 95.97500000000001,<br>96.00250000000001, 96.03000000000002, 96.05750000000002,<br>96.08500000000001, 96.11250000000001, 96.14000000000001,<br>96.16750000000002, 96.19500000000001, 96.22250000000001,<br>96.25000000000001, 96.27750000000002, 96.305, 96.33250000000001,<br>96.36000000000001, 96.38750000000002, 96.415, 96.44250000000001,<br>96.47000000000001, 96.49750000000002, 96.525, 96.55250000000001,<br>96.58000000000001, 96.60750000000002, 96.63500000000002,<br>96.66250000000001, 96.69000000000001, 96.71750000000002,<br>96.74500000000002, 96.77250000000001, 96.80000000000001,<br>96.82750000000001, 96.85500000000002, 96.88250000000001,<br>96.91000000000001, 96.93750000000001, 96.96500000000002, 96.9925,<br>97.02000000000001, 97.04750000000001, 97.07500000000002, 97.1025,<br>97.13000000000001, 97.15750000000001, 97.18500000000002, 97.2125,<br>97.24000000000001, 97.26750000000001, 97.29500000000002,<br>97.32250000000002, 97.35000000000001, 97.37750000000001,<br>97.40500000000002, 97.43250000000002, 97.46000000000001,<br>97.48750000000001, 97.51500000000001, 97.54250000000002,<br>97.57000000000001, 97.59750000000001, 97.62500000000001,<br>97.65250000000002, 97.68, 97.70750000000001, 97.73500000000001,<br>97.76250000000002, 97.79, 97.81750000000001, 97.84500000000001,<br>97.87250000000002, 97.90000000000002, 97.92750000000001,<br>97.95500000000001, 97.98250000000002, 98.01000000000002,<br>98.03750000000001, 98.06500000000001, 98.09250000000002,<br>98.12000000000002, 98.14750000000001, 98.17500000000001, |



| Description | Value                                                                                                                                                                                                                                                                                                                                                                                                                                                                                                                                                                                                                                                                                                                                                                                                                                                                                                                                                                                                                                                                                                                                                                                                                                                                                                                                                                                                                                                                                                                                                                                                                                                                                                                                                                                                                                                                                                                                                                                                                                                                                                                                                                                                                                                                                                                                                                                                                                                                                                                                                                                                                                                                                                                                                                                                                                                                                                                                                                                                                                                                                                                 |
|-------------|-----------------------------------------------------------------------------------------------------------------------------------------------------------------------------------------------------------------------------------------------------------------------------------------------------------------------------------------------------------------------------------------------------------------------------------------------------------------------------------------------------------------------------------------------------------------------------------------------------------------------------------------------------------------------------------------------------------------------------------------------------------------------------------------------------------------------------------------------------------------------------------------------------------------------------------------------------------------------------------------------------------------------------------------------------------------------------------------------------------------------------------------------------------------------------------------------------------------------------------------------------------------------------------------------------------------------------------------------------------------------------------------------------------------------------------------------------------------------------------------------------------------------------------------------------------------------------------------------------------------------------------------------------------------------------------------------------------------------------------------------------------------------------------------------------------------------------------------------------------------------------------------------------------------------------------------------------------------------------------------------------------------------------------------------------------------------------------------------------------------------------------------------------------------------------------------------------------------------------------------------------------------------------------------------------------------------------------------------------------------------------------------------------------------------------------------------------------------------------------------------------------------------------------------------------------------------------------------------------------------------------------------------------------------------------------------------------------------------------------------------------------------------------------------------------------------------------------------------------------------------------------------------------------------------------------------------------------------------------------------------------------------------------------------------------------------------------------------------------------------------|
|             | 98.20250000000001, 98.23000000000002, 98.25750000000001,<br>98.28500000000001, 98.31250000000001, 98.34000000000002, 98.3675,<br>98.39500000000001, 98.42250000000001, 98.45000000000002, 98.4775,<br>98.50500000000001, 98.53250000000001, 98.56000000000002,<br>98.58750000000002, 98.61500000000001, 98.64250000000001,<br>98.67000000000002, 98.69750000000002, 98.72500000000001,<br>98.75250000000001, 98.78000000000002, 98.80750000000002,<br>98.83500000000001, 98.86250000000001, 98.89000000000001,<br>98.91750000000002, 98.94500000000001, 98.97250000000001,<br>99.00000000000001, 99.02750000000002, 99.055, 99.08250000000001,<br>99.11000000000001, 99.13750000000002, 99.165, 99.19250000000001,<br>99.22000000000001, 99.24750000000002, 99.27500000000002,<br>99.30250000000001, 99.33000000000001, 99.35750000000002,<br>99.38500000000002, 99.41250000000001, 99.44000000000001,<br>99.46750000000002, 99.49500000000002, 99.52250000000001,<br>99.55000000000001, 99.57750000000001, 99.60500000000002,<br>99.63250000000001, 99.66000000000001, 99.68750000000001,<br>99.71500000000002, 99.7425, 99.77000000000001, 99.79750000000001,<br>99.82500000000002, 99.8525, 99.88000000000001, 99.90750000000001,<br>99.93500000000002, 99.96250000000002, 99.99000000000001,<br>100.01750000000001, 100.04500000000002, 100.07250000000002,<br>100.10000000000001, 100.12750000000001, 100.15500000000002,<br>100.18250000000002, 100.21000000000001, 100.23750000000001,<br>100.26500000000001, 100.29250000000002, 100.32000000000001,<br>100.34750000000001, 100.37500000000001, 100.40250000000002, 100.43,<br>100.45750000000001, 100.48500000000001, 100.51250000000002, 100.54,<br>100.56750000000001, 100.59500000000001, 100.62250000000002,<br>100.65000000000002, 100.67750000000001, 100.70500000000001,<br>100.73250000000002, 100.76000000000002, 100.78750000000001,<br>100.81500000000001, 100.84250000000002, 100.87000000000002,<br>100.89750000000001, 100.92500000000001, 100.95250000000001,<br>100.98000000000002, 101.00750000000001, 101.03500000000001,<br>101.06250000000001, 101.09000000000002, 101.1175,<br>101.14500000000001, 101.17250000000001, 101.20000000000002,<br>101.2275, 101.25500000000001, 101.28250000000001,<br>101.31000000000002, 101.33750000000002, 101.36500000000001,<br>101.39250000000001, 101.42000000000002, 101.44750000000002,<br>101.47500000000001, 101.50250000000001, 101.53000000000002,<br>101.55750000000002, 101.58500000000001, 101.61250000000001,<br>101.64000000000001, 101.66750000000002, 101.69500000000001,<br>101.72250000000001, 101.75000000000001, 101.77750000000002,<br>101.805, 101.83250000000001, 101.86000000000001,<br>101.88750000000002, 101.91500000000002, 101.94250000000001,<br>101.97000000000001, 101.99750000000002, 102.02500000000002,<br>102.05250000000001, 102.08000000000001, 102.10750000000002,<br>102.13500000000002, 102.16250000000001, 102.19000000000001,<br>102.21750000000002, 102.24500000000002, 102.27250000000001,<br>102.30000000000001, 102.32750000000001, 102.35500000000002, |

| Description | Value                                                                                                                                                                                                                                                                                                                                                                                                                                                                                                                                                                                                                                                                                                                                                                                                                                                                                                                                                                                                                                                                                                                                                                                                                                                                                                                                                                                                                                                                                                                                                                                                                                                                                                                                                                                                                                                                                                                                                                                                                                                                                                                                                                                                                                                                                                                                                                                                                                                                                                                                                                                                                                                                                                                                                                                                                                                                                                                                                                                                                                                                                                               |
|-------------|---------------------------------------------------------------------------------------------------------------------------------------------------------------------------------------------------------------------------------------------------------------------------------------------------------------------------------------------------------------------------------------------------------------------------------------------------------------------------------------------------------------------------------------------------------------------------------------------------------------------------------------------------------------------------------------------------------------------------------------------------------------------------------------------------------------------------------------------------------------------------------------------------------------------------------------------------------------------------------------------------------------------------------------------------------------------------------------------------------------------------------------------------------------------------------------------------------------------------------------------------------------------------------------------------------------------------------------------------------------------------------------------------------------------------------------------------------------------------------------------------------------------------------------------------------------------------------------------------------------------------------------------------------------------------------------------------------------------------------------------------------------------------------------------------------------------------------------------------------------------------------------------------------------------------------------------------------------------------------------------------------------------------------------------------------------------------------------------------------------------------------------------------------------------------------------------------------------------------------------------------------------------------------------------------------------------------------------------------------------------------------------------------------------------------------------------------------------------------------------------------------------------------------------------------------------------------------------------------------------------------------------------------------------------------------------------------------------------------------------------------------------------------------------------------------------------------------------------------------------------------------------------------------------------------------------------------------------------------------------------------------------------------------------------------------------------------------------------------------------------|
|             | 102.38250000000001, 102.41000000000001, 102.43750000000001,<br>102.46500000000002, 102.4925, 102.52000000000001,<br>102.54750000000001, 102.57500000000002, 102.60250000000002,<br>102.63000000000001, 102.65750000000001, 102.68500000000002,<br>102.71250000000002, 102.74000000000001, 102.76750000000001,<br>102.79500000000002, 102.82250000000002, 102.85000000000001,<br>102.87750000000001, 102.90500000000002, 102.93250000000002,<br>102.96000000000001, 102.98750000000001, 103.01500000000001,<br>103.04250000000002, 103.07000000000001, 103.09750000000001,<br>103.12500000000001, 103.15250000000002, 103.18, 103.20750000000001,<br>103.23500000000001, 103.26250000000002, 103.29000000000002,<br>103.31750000000001, 103.34500000000001, 103.37250000000002,<br>103.40000000000002, 103.42750000000001, 103.45500000000001,<br>103.48250000000002, 103.51000000000002, 103.53750000000001,<br>103.56500000000001, 103.59250000000002, 103.62000000000002,<br>103.64750000000001, 103.67500000000001, 103.70250000000001,<br>103.73000000000002, 103.75750000000001, 103.78500000000001,<br>103.81250000000001, 103.84000000000002, 103.8675,<br>103.89500000000001, 103.92250000000001, 103.95000000000002,<br>103.97750000000002, 104.00500000000001, 104.03250000000001,<br>104.06000000000002, 104.08750000000002, 104.11500000000001,<br>104.14250000000001, 104.17000000000002, 104.19750000000002,<br>104.22500000000001, 104.25250000000001, 104.28000000000002,<br>104.30750000000002, 104.33500000000001, 104.36250000000001,<br>104.39000000000001, 104.41750000000002, 104.44500000000001,<br>104.47250000000001, 104.50000000000001, 104.52750000000002,<br>104.555, 104.58250000000001, 104.61000000000001,<br>104.63750000000002, 104.66500000000002, 104.69250000000001,<br>104.72000000000001, 104.74750000000002, 104.77500000000002,<br>104.80250000000001, 104.83000000000001, 104.85750000000002,<br>104.88500000000002, 104.91250000000001, 104.94000000000001,<br>104.96750000000002, 104.99500000000002, 105.02250000000001,<br>105.05000000000001, 105.07750000000001, 105.10500000000002,<br>105.13250000000001, 105.16000000000001, 105.18750000000001,<br>105.21500000000002, 105.2425, 105.27000000000001,<br>105.29750000000001, 105.32500000000002, 105.35250000000002,<br>105.38000000000001, 105.40750000000001, 105.43500000000002,<br>105.46250000000002, 105.49000000000001, 105.51750000000001,<br>105.54500000000002, 105.57250000000002, 105.60000000000001,<br>105.62750000000001, 105.65500000000002, 105.68250000000002,<br>105.71000000000001, 105.73750000000001, 105.76500000000001,<br>105.79250000000002, 105.82000000000001, 105.84750000000001,<br>105.87500000000001, 105.90250000000002, 105.93, 105.95750000000001,<br>105.98500000000001, 106.01250000000002, 106.04000000000002,<br>106.06750000000001, 106.09500000000001, 106.12250000000002,<br>106.15000000000002, 106.17750000000001, 106.20500000000001,<br>106.23250000000002, 106.26000000000002, 106.28750000000001,<br>106.31500000000001, 106.34250000000002, 106.37000000000002, |

| Description | Value                                                                                                                                                                                                                                                                                                                                                                                                                                                                                                                                                                                                                                                                                                                                                                                                                                                                                                                                                                                                                                                                                                                                                                                                                                                                                                                                                                                                                                                                                                                                                                                                                                                                                                                                                                                                                                                                                                                                                                                                                                                                                                                                                                                                                                                                                                                                                                                                                                                                                                                                                                                                                                                                                                                                                                                                                                                                                                                                                                                                                                                                                                                                        |
|-------------|----------------------------------------------------------------------------------------------------------------------------------------------------------------------------------------------------------------------------------------------------------------------------------------------------------------------------------------------------------------------------------------------------------------------------------------------------------------------------------------------------------------------------------------------------------------------------------------------------------------------------------------------------------------------------------------------------------------------------------------------------------------------------------------------------------------------------------------------------------------------------------------------------------------------------------------------------------------------------------------------------------------------------------------------------------------------------------------------------------------------------------------------------------------------------------------------------------------------------------------------------------------------------------------------------------------------------------------------------------------------------------------------------------------------------------------------------------------------------------------------------------------------------------------------------------------------------------------------------------------------------------------------------------------------------------------------------------------------------------------------------------------------------------------------------------------------------------------------------------------------------------------------------------------------------------------------------------------------------------------------------------------------------------------------------------------------------------------------------------------------------------------------------------------------------------------------------------------------------------------------------------------------------------------------------------------------------------------------------------------------------------------------------------------------------------------------------------------------------------------------------------------------------------------------------------------------------------------------------------------------------------------------------------------------------------------------------------------------------------------------------------------------------------------------------------------------------------------------------------------------------------------------------------------------------------------------------------------------------------------------------------------------------------------------------------------------------------------------------------------------------------------------|
|             | 106.39750000000001, 106.42500000000001, 106.45250000000001,<br>106.48000000000002, 106.50750000000001, 106.53500000000001,<br>106.56250000000001, 106.59000000000002, 106.61750000000002,<br>106.64500000000001, 106.67250000000001, 106.70000000000002,<br>106.72750000000002, 106.75500000000001, 106.78250000000001,<br>106.81000000000002, 106.83750000000002, 106.86500000000001,<br>106.89250000000001, 106.92000000000002, 106.94750000000002,<br>106.97500000000001, 107.00250000000001, 107.03000000000002,<br>107.05750000000002, 107.08500000000001, 107.11250000000001,<br>107.14000000000001, 107.16750000000002, 107.19500000000001,<br>107.22250000000001, 107.25000000000001, 107.27750000000002,<br>107.30500000000002, 107.33250000000001, 107.36000000000001,<br>107.38750000000002, 107.41500000000002, 107.44250000000001,<br>107.47000000000001, 107.49750000000002, 107.52500000000002,<br>107.55250000000001, 107.58000000000001, 107.60750000000002,<br>107.63500000000002, 107.66250000000001, 107.69000000000001,<br>107.71750000000002, 107.74500000000002, 107.77250000000001,<br>107.80000000000001, 107.82750000000001, 107.85500000000002,<br>107.88250000000001, 107.91000000000001, 107.93750000000001,<br>107.96500000000002, 107.99250000000002, 108.02000000000001,<br>108.04750000000001, 108.07500000000002, 108.10250000000002,<br>108.13000000000001, 108.15750000000001, 108.18500000000002,<br>108.21250000000002, 108.24000000000001, 108.26750000000001,<br>108.29500000000002, 108.32250000000002, 108.35000000000001,<br>108.37750000000001, 108.40500000000002, 108.43250000000002,<br>108.46000000000001, 108.48750000000001, 108.51500000000001,<br>108.54250000000002, 108.57000000000001, 108.59750000000001,<br>108.62500000000001, 108.65250000000002, 108.68000000000002,<br>108.70750000000001, 108.73500000000001, 108.76250000000002,<br>108.79000000000002, 108.81750000000001, 108.84500000000001,<br>108.87250000000002, 108.90000000000002, 108.92750000000001,<br>108.95500000000001, 108.98250000000002, 109.01000000000002,<br>109.03750000000001, 109.06500000000001, 109.09250000000002,<br>109.12000000000002, 109.14750000000001, 109.17500000000001,<br>109.20250000000001, 109.23000000000002, 109.25750000000001,<br>109.28500000000001, 109.31250000000001, 109.34000000000002,<br>109.36750000000002, 109.39500000000001, 109.42250000000001,<br>109.45000000000002, 109.47750000000002, 109.50500000000001,<br>109.53250000000001, 109.56000000000002, 109.58750000000002,<br>109.61500000000001, 109.64250000000001, 109.67000000000002,<br>109.69750000000002, 109.72500000000001, 109.75250000000001,<br>109.78000000000002, 109.80750000000002, 109.83500000000001,<br>109.86250000000001, 109.89000000000001, 109.91750000000002,<br>109.94500000000001, 109.97250000000001, 110.00000000000001,<br>110.02750000000002, 110.05500000000002, 110.08250000000001,<br>110.11000000000001, 110.13750000000002, 110.16500000000002,<br>110.19250000000001, 110.22000000000001, 110.24750000000002,<br>110.27500000000002, 110.30250000000001, 110.33000000000001, |

| Description | Value                                                                                                                                                                                                                                                                                                                                                                                                                                                                                                                                                                                                                                                                                                                                                                                                                                                                                                                                                                                                                                                                                                                                                                                                                                                                                                                                                                                                                                                                                                                                                                                                                                                                                                                                                                                                                                                                                                                                                                                                                                                                                                                                                                                                                                                                                                                                                                                                                                                                                                                                                                                                                                                                                                                                                                                                                                                                                                                                                                                                                                                                                                                                        |
|-------------|----------------------------------------------------------------------------------------------------------------------------------------------------------------------------------------------------------------------------------------------------------------------------------------------------------------------------------------------------------------------------------------------------------------------------------------------------------------------------------------------------------------------------------------------------------------------------------------------------------------------------------------------------------------------------------------------------------------------------------------------------------------------------------------------------------------------------------------------------------------------------------------------------------------------------------------------------------------------------------------------------------------------------------------------------------------------------------------------------------------------------------------------------------------------------------------------------------------------------------------------------------------------------------------------------------------------------------------------------------------------------------------------------------------------------------------------------------------------------------------------------------------------------------------------------------------------------------------------------------------------------------------------------------------------------------------------------------------------------------------------------------------------------------------------------------------------------------------------------------------------------------------------------------------------------------------------------------------------------------------------------------------------------------------------------------------------------------------------------------------------------------------------------------------------------------------------------------------------------------------------------------------------------------------------------------------------------------------------------------------------------------------------------------------------------------------------------------------------------------------------------------------------------------------------------------------------------------------------------------------------------------------------------------------------------------------------------------------------------------------------------------------------------------------------------------------------------------------------------------------------------------------------------------------------------------------------------------------------------------------------------------------------------------------------------------------------------------------------------------------------------------------------|
|             | 110.35750000000002, 110.38500000000002, 110.41250000000001,<br>110.44000000000001, 110.46750000000002, 110.49500000000002,<br>110.52250000000001, 110.55000000000001, 110.57750000000001,<br>110.60500000000002, 110.63250000000002, 110.66000000000001,<br>110.68750000000001, 110.71500000000002, 110.74250000000002,<br>110.77000000000001, 110.79750000000001, 110.82500000000002,<br>110.85250000000002, 110.88000000000001, 110.90750000000001,<br>110.93500000000002, 110.96250000000002, 110.99000000000001,<br>111.01750000000001, 111.04500000000002, 111.07250000000002,<br>111.10000000000001, 111.12750000000001, 111.15500000000002,<br>111.18250000000002, 111.21000000000001, 111.23750000000001,<br>111.26500000000001, 111.29250000000002, 111.32000000000002,<br>111.34750000000001, 111.37500000000001, 111.40250000000002,<br>111.43000000000002, 111.45750000000001, 111.48500000000001,<br>111.51250000000002, 111.54000000000002, 111.56750000000001,<br>111.59500000000001, 111.62250000000002, 111.65000000000002,<br>111.67750000000001, 111.70500000000001, 111.73250000000002,<br>111.76000000000002, 111.78750000000001, 111.81500000000001,<br>111.84250000000002, 111.87000000000002, 111.89750000000001,<br>111.92500000000001, 111.95250000000001, 111.98000000000002,<br>112.00750000000002, 112.03500000000001, 112.06250000000001,<br>112.09000000000002, 112.11750000000002, 112.14500000000001,<br>112.17250000000001, 112.20000000000002, 112.22750000000002,<br>112.25500000000001, 112.28250000000001, 112.31000000000002,<br>112.33750000000002, 112.36500000000001, 112.39250000000001,<br>112.42000000000002, 112.44750000000002, 112.47500000000001,<br>112.50250000000001, 112.53000000000002, 112.55750000000002,<br>112.58500000000001, 112.61250000000001, 112.64000000000001,<br>112.66750000000002, 112.69500000000002, 112.72250000000001,<br>112.75000000000001, 112.77750000000002, 112.80500000000002,<br>112.83250000000001, 112.86000000000001, 112.88750000000002,<br>112.91500000000002, 112.94250000000001, 112.97000000000001,<br>112.99750000000002, 113.02500000000002, 113.05250000000001,<br>113.08000000000001, 113.10750000000002, 113.13500000000002,<br>113.16250000000001, 113.19000000000001, 113.21750000000002,<br>113.24500000000002, 113.27250000000001, 113.30000000000001,<br>113.32750000000001, 113.35500000000002, 113.38250000000002,<br>113.41000000000001, 113.43750000000001, 113.46500000000002,<br>113.49250000000002, 113.52000000000001, 113.54750000000001,<br>113.57500000000002, 113.60250000000002, 113.63000000000001,<br>113.65750000000001, 113.68500000000002, 113.71250000000002,<br>113.74000000000001, 113.76750000000001, 113.79500000000002,<br>113.82250000000002, 113.85000000000001, 113.87750000000001,<br>113.90500000000002, 113.93250000000002, 113.96000000000001,<br>113.98750000000001, 114.01500000000001, 114.04250000000002,<br>114.07000000000002, 114.09750000000001, 114.12500000000001,<br>114.15250000000002, 114.18000000000002, 114.20750000000001,<br>114.23500000000001, 114.26250000000002, 114.29000000000002, |

| Description | Value                                                                                                                                                                                                                                                                                                                                                                                                                                                                                                                                                                                                                                                                                                                                                                                                                                                                                                                                                                                                                                                                                                                                                                                                                                                                                                                                                                                                                                                                                                                                                                                                                                                                                                                                                                                                                                                                                                                                                                                                                                                                                                                                                                                                                                                                                                                                                                                                                                                                                                                                                                                                                                                                                                                                                                                                                                                                                                                                                                                                                                                                                                                                        |
|-------------|----------------------------------------------------------------------------------------------------------------------------------------------------------------------------------------------------------------------------------------------------------------------------------------------------------------------------------------------------------------------------------------------------------------------------------------------------------------------------------------------------------------------------------------------------------------------------------------------------------------------------------------------------------------------------------------------------------------------------------------------------------------------------------------------------------------------------------------------------------------------------------------------------------------------------------------------------------------------------------------------------------------------------------------------------------------------------------------------------------------------------------------------------------------------------------------------------------------------------------------------------------------------------------------------------------------------------------------------------------------------------------------------------------------------------------------------------------------------------------------------------------------------------------------------------------------------------------------------------------------------------------------------------------------------------------------------------------------------------------------------------------------------------------------------------------------------------------------------------------------------------------------------------------------------------------------------------------------------------------------------------------------------------------------------------------------------------------------------------------------------------------------------------------------------------------------------------------------------------------------------------------------------------------------------------------------------------------------------------------------------------------------------------------------------------------------------------------------------------------------------------------------------------------------------------------------------------------------------------------------------------------------------------------------------------------------------------------------------------------------------------------------------------------------------------------------------------------------------------------------------------------------------------------------------------------------------------------------------------------------------------------------------------------------------------------------------------------------------------------------------------------------------|
|             | 114.31750000000001, 114.34500000000001, 114.37250000000002,<br>114.40000000000002, 114.42750000000001, 114.45500000000001,<br>114.48250000000002, 114.51000000000002, 114.53750000000001,<br>114.56500000000001, 114.59250000000002, 114.62000000000002,<br>114.64750000000001, 114.67500000000001, 114.70250000000001,<br>114.73000000000002, 114.75750000000002, 114.78500000000001,<br>114.81250000000001, 114.84000000000002, 114.86750000000002,<br>114.89500000000001, 114.92250000000001, 114.95000000000002,<br>114.97750000000002, 115.00500000000001, 115.03250000000001,<br>115.06000000000002, 115.08750000000002, 115.11500000000001,<br>115.14250000000001, 115.17000000000002, 115.19750000000002,<br>115.22500000000001, 115.25250000000001, 115.28000000000002,<br>115.30750000000002, 115.33500000000002, 115.36250000000001,<br>115.39000000000001, 115.41750000000002, 115.44500000000002,<br>115.47250000000001, 115.50000000000001, 115.52750000000002,<br>115.55500000000002, 115.58250000000001, 115.61000000000001,<br>115.63750000000002, 115.66500000000002, 115.69250000000001,<br>115.72000000000001, 115.74750000000002, 115.77500000000002,<br>115.80250000000001, 115.83000000000001, 115.85750000000002,<br>115.88500000000002, 115.91250000000001, 115.94000000000001,<br>115.96750000000002, 115.99500000000002, 116.02250000000002,<br>116.05000000000001, 116.07750000000001, 116.10500000000002,<br>116.13250000000002, 116.16000000000001, 116.18750000000001,<br>116.21500000000002, 116.24250000000002, 116.27000000000001,<br>116.29750000000001, 116.32500000000002, 116.35250000000002,<br>116.38000000000001, 116.40750000000001, 116.43500000000002,<br>116.46250000000002, 116.49000000000001, 116.51750000000001,<br>116.54500000000002, 116.57250000000002, 116.60000000000001,<br>116.62750000000001, 116.65500000000002, 116.68250000000002,<br>116.71000000000002, 116.73750000000001, 116.76500000000001,<br>116.79250000000002, 116.82000000000002, 116.84750000000001,<br>116.87500000000001, 116.90250000000002, 116.93000000000002,<br>116.95750000000001, 116.98500000000001, 117.01250000000002,<br>117.04000000000002, 117.06750000000001, 117.09500000000001,<br>117.12250000000002, 117.15000000000002, 117.17750000000001,<br>117.20500000000001, 117.23250000000002, 117.26000000000002,<br>117.28750000000001, 117.31500000000001, 117.34250000000002,<br>117.37000000000002, 117.39750000000002, 117.42500000000001,<br>117.45250000000001, 117.48000000000002, 117.50750000000002,<br>117.53500000000001, 117.56250000000001, 117.59000000000002,<br>117.61750000000002, 117.64500000000001, 117.67250000000001,<br>117.70000000000002, 117.72750000000002, 117.75500000000001,<br>117.78250000000001, 117.81000000000002, 117.83750000000002,<br>117.86500000000001, 117.89250000000001, 117.92000000000002,<br>117.94750000000002, 117.97500000000001, 118.00250000000001,<br>118.03000000000002, 118.05750000000002, 118.08500000000002,<br>118.11250000000001, 118.14000000000001, 118.16750000000002,<br>118.19500000000002, 118.22250000000001, 118.25000000000001, |

| Description | Value                                                                                                                                                                                                                                                                                                                                                                                                                                                                                                                                                                                                                                                                                                                                                                                                                                                                                                                                                                                                                                                                                                                                                                                                                                                                                                                                                                                                                                                                                                                                                                                                                                                                                                                                                                                                                                                                                                                                                                                                                                                                                                                                                                                                                                                                                                                                                                                                                                                                                                                                                                                                                                                                                                                                                                                                                                                                                                                                                                                                                                                                                                                                        |
|-------------|----------------------------------------------------------------------------------------------------------------------------------------------------------------------------------------------------------------------------------------------------------------------------------------------------------------------------------------------------------------------------------------------------------------------------------------------------------------------------------------------------------------------------------------------------------------------------------------------------------------------------------------------------------------------------------------------------------------------------------------------------------------------------------------------------------------------------------------------------------------------------------------------------------------------------------------------------------------------------------------------------------------------------------------------------------------------------------------------------------------------------------------------------------------------------------------------------------------------------------------------------------------------------------------------------------------------------------------------------------------------------------------------------------------------------------------------------------------------------------------------------------------------------------------------------------------------------------------------------------------------------------------------------------------------------------------------------------------------------------------------------------------------------------------------------------------------------------------------------------------------------------------------------------------------------------------------------------------------------------------------------------------------------------------------------------------------------------------------------------------------------------------------------------------------------------------------------------------------------------------------------------------------------------------------------------------------------------------------------------------------------------------------------------------------------------------------------------------------------------------------------------------------------------------------------------------------------------------------------------------------------------------------------------------------------------------------------------------------------------------------------------------------------------------------------------------------------------------------------------------------------------------------------------------------------------------------------------------------------------------------------------------------------------------------------------------------------------------------------------------------------------------------|
|             | 118.27750000000002, 118.30500000000002, 118.33250000000001,<br>118.36000000000001, 118.38750000000002, 118.41500000000002,<br>118.44250000000001, 118.47000000000001, 118.49750000000002,<br>118.52500000000002, 118.55250000000001, 118.58000000000001,<br>118.60750000000002, 118.63500000000002, 118.66250000000001,<br>118.69000000000001, 118.71750000000002, 118.74500000000002,<br>118.77250000000002, 118.80000000000001, 118.82750000000001,<br>118.85500000000002, 118.88250000000002, 118.91000000000001,<br>118.93750000000001, 118.96500000000002, 118.99250000000002,<br>119.02000000000001, 119.04750000000001, 119.07500000000002,<br>119.10250000000002, 119.13000000000001, 119.15750000000001,<br>119.18500000000002, 119.21250000000002, 119.24000000000001,<br>119.26750000000001, 119.29500000000002, 119.32250000000002,<br>119.35000000000002, 119.37750000000001, 119.40500000000002,<br>119.43250000000002, 119.46000000000002, 119.48750000000001,<br>119.51500000000001, 119.54250000000002, 119.57000000000002,<br>119.59750000000001, 119.62500000000001, 119.65250000000002,<br>119.68000000000002, 119.70750000000001, 119.73500000000001,<br>119.76250000000002, 119.79000000000002, 119.81750000000001,<br>119.84500000000001, 119.87250000000002, 119.90000000000002,<br>119.92750000000001, 119.95500000000001, 119.98250000000002,<br>120.01000000000002, 120.03750000000002, 120.06500000000001,<br>120.09250000000002, 120.12000000000002, 120.14750000000002,<br>120.17500000000001, 120.20250000000001, 120.23000000000002,<br>120.25750000000002, 120.28500000000001, 120.31250000000001,<br>120.34000000000002, 120.36750000000002, 120.39500000000001,<br>120.42250000000001, 120.45000000000002, 120.47750000000002,<br>120.50500000000001, 120.53250000000001, 120.56000000000002,<br>120.58750000000002, 120.61500000000001, 120.64250000000001,<br>120.67000000000002, 120.69750000000002, 120.72500000000002,<br>120.75250000000001, 120.78000000000002, 120.80750000000002,<br>120.83500000000002, 120.86250000000001, 120.89000000000001,<br>120.91750000000002, 120.94500000000002, 120.97250000000001,<br>121.00000000000001, 121.02750000000002, 121.05500000000002,<br>121.08250000000001, 121.11000000000001, 121.13750000000002,<br>121.16500000000002, 121.19250000000001, 121.22000000000001,<br>121.24750000000002, 121.27500000000002, 121.30250000000001,<br>121.33000000000001, 121.35750000000002, 121.38500000000002,<br>121.41250000000002, 121.44000000000001, 121.46750000000002,<br>121.49500000000002, 121.52250000000002, 121.55000000000001,<br>121.57750000000001, 121.60500000000002, 121.63250000000002,<br>121.66000000000001, 121.68750000000001, 121.71500000000002,<br>121.74250000000002, 121.77000000000001, 121.79750000000001,<br>121.82500000000002, 121.85250000000002, 121.88000000000001,<br>121.90750000000001, 121.93500000000002, 121.96250000000002,<br>121.99000000000001, 122.01750000000001, 122.04500000000002,<br>122.07250000000002, 122.10000000000002, 122.12750000000001,<br>122.15500000000002, 122.18250000000002, 122.21000000000002, |

| Description | Value                                                                                                                                                                                                                                                                                                                                                                                                                                                                                                                                                                                                                                                                                                                                                                                                                                                                                                                                                                                                                                                                                                                                                                                                                                                                                                                                                                                                                                                                                                                                                                                                                                                                                                                                                                                                                                                                                                                                                                                                                                                                                                                                                                                                                                                                                                                                                                                                                                                                                                                                                                                                                                                                                                                                                                                                                                                                                                                                                                                                                                                                                                                                        |
|-------------|----------------------------------------------------------------------------------------------------------------------------------------------------------------------------------------------------------------------------------------------------------------------------------------------------------------------------------------------------------------------------------------------------------------------------------------------------------------------------------------------------------------------------------------------------------------------------------------------------------------------------------------------------------------------------------------------------------------------------------------------------------------------------------------------------------------------------------------------------------------------------------------------------------------------------------------------------------------------------------------------------------------------------------------------------------------------------------------------------------------------------------------------------------------------------------------------------------------------------------------------------------------------------------------------------------------------------------------------------------------------------------------------------------------------------------------------------------------------------------------------------------------------------------------------------------------------------------------------------------------------------------------------------------------------------------------------------------------------------------------------------------------------------------------------------------------------------------------------------------------------------------------------------------------------------------------------------------------------------------------------------------------------------------------------------------------------------------------------------------------------------------------------------------------------------------------------------------------------------------------------------------------------------------------------------------------------------------------------------------------------------------------------------------------------------------------------------------------------------------------------------------------------------------------------------------------------------------------------------------------------------------------------------------------------------------------------------------------------------------------------------------------------------------------------------------------------------------------------------------------------------------------------------------------------------------------------------------------------------------------------------------------------------------------------------------------------------------------------------------------------------------------------|
|             | 122.23750000000001, 122.26500000000001, 122.29250000000002,<br>122.32000000000002, 122.34750000000001, 122.37500000000001,<br>122.40250000000002, 122.43000000000002, 122.45750000000001,<br>122.48500000000001, 122.51250000000002, 122.54000000000002,<br>122.56750000000001, 122.59500000000001, 122.62250000000002,<br>122.65000000000002, 122.67750000000001, 122.70500000000001,<br>122.73250000000002, 122.76000000000002, 122.78750000000002,<br>122.81500000000001, 122.84250000000002, 122.87000000000002,<br>122.89750000000002, 122.92500000000001, 122.95250000000001,<br>122.98000000000002, 123.00750000000002, 123.03500000000001,<br>123.06250000000001, 123.09000000000002, 123.11750000000002,<br>123.14500000000001, 123.17250000000001, 123.20000000000002,<br>123.22750000000002, 123.25500000000001, 123.28250000000001,<br>123.31000000000002, 123.33750000000002, 123.36500000000001,<br>123.39250000000001, 123.42000000000002, 123.44750000000002,<br>123.47500000000002, 123.50250000000001, 123.53000000000002,<br>123.55750000000002, 123.58500000000002, 123.61250000000001,<br>123.64000000000001, 123.66750000000002, 123.69500000000002,<br>123.72250000000001, 123.75000000000001, 123.77750000000002,<br>123.80500000000002, 123.83250000000001, 123.86000000000001,<br>123.88750000000002, 123.91500000000002, 123.94250000000001,<br>123.97000000000001, 123.99750000000002, 124.02500000000002,<br>124.05250000000002, 124.08000000000001, 124.10750000000002,<br>124.13500000000002, 124.16250000000002, 124.19000000000001,<br>124.21750000000002, 124.24500000000002, 124.27250000000002,<br>124.30000000000001, 124.32750000000001, 124.35500000000002,<br>124.38250000000002, 124.41000000000001, 124.43750000000001,<br>124.46500000000002, 124.49250000000002, 124.52000000000001,<br>124.54750000000001, 124.57500000000002, 124.60250000000002,<br>124.63000000000001, 124.65750000000001, 124.68500000000002,<br>124.71250000000002, 124.74000000000002, 124.76750000000001,<br>124.79500000000002, 124.82250000000002, 124.85000000000002,<br>124.87750000000001, 124.90500000000002, 124.93250000000002,<br>124.96000000000002, 124.98750000000001, 125.01500000000001,<br>125.04250000000002, 125.07000000000002, 125.09750000000001,<br>125.12500000000001, 125.15250000000002, 125.18000000000002,<br>125.20750000000001, 125.23500000000001, 125.26250000000002,<br>125.29000000000002, 125.31750000000001, 125.34500000000001,<br>125.37250000000002, 125.40000000000002, 125.42750000000002,<br>125.45500000000001, 125.48250000000002, 125.51000000000002,<br>125.53750000000002, 125.56500000000001, 125.59250000000002,<br>125.62000000000002, 125.64750000000002, 125.67500000000001,<br>125.70250000000001, 125.73000000000002, 125.75750000000002,<br>125.78500000000001, 125.81250000000001, 125.84000000000002,<br>125.86750000000002, 125.89500000000001, 125.92250000000001,<br>125.95000000000002, 125.97750000000002, 126.00500000000001,<br>126.03250000000001, 126.06000000000002, 126.08750000000002,<br>126.11500000000002, 126.14250000000001, 126.17000000000002, |

| Description | Value                                                                                                                                                                                                                                                                                                                                                                                                                                                                                                                                                                                                                                                                                                                                                                                                                                                                                                                                                                                                                                                                                                                                                                                                                                                                                                                                                                                                                                                                                                                                                                                                                                                                                                                                                                                                                                                                                                                                                                                                                                                                                                                                                                                                                                                                                                                                                                                                                                                                                                                                                                                                                                                                                                                                                                                                                                                                                                                                                                                                                                                                                                                                                                                         |
|-------------|-----------------------------------------------------------------------------------------------------------------------------------------------------------------------------------------------------------------------------------------------------------------------------------------------------------------------------------------------------------------------------------------------------------------------------------------------------------------------------------------------------------------------------------------------------------------------------------------------------------------------------------------------------------------------------------------------------------------------------------------------------------------------------------------------------------------------------------------------------------------------------------------------------------------------------------------------------------------------------------------------------------------------------------------------------------------------------------------------------------------------------------------------------------------------------------------------------------------------------------------------------------------------------------------------------------------------------------------------------------------------------------------------------------------------------------------------------------------------------------------------------------------------------------------------------------------------------------------------------------------------------------------------------------------------------------------------------------------------------------------------------------------------------------------------------------------------------------------------------------------------------------------------------------------------------------------------------------------------------------------------------------------------------------------------------------------------------------------------------------------------------------------------------------------------------------------------------------------------------------------------------------------------------------------------------------------------------------------------------------------------------------------------------------------------------------------------------------------------------------------------------------------------------------------------------------------------------------------------------------------------------------------------------------------------------------------------------------------------------------------------------------------------------------------------------------------------------------------------------------------------------------------------------------------------------------------------------------------------------------------------------------------------------------------------------------------------------------------------------------------------------------------------------------------------------------------------|
|             | 126.19750000000002, 126.22500000000002, 126.25250000000001,<br>126.28000000000002, 126.30750000000002, 126.33500000000002,<br>126.36250000000001, 126.39000000000001, 126.41750000000002,<br>126.44500000000002, 126.47250000000001, 126.50000000000001,<br>126.52750000000002, 126.55500000000002, 126.58250000000001,<br>126.61000000000001, 126.63750000000002, 126.66500000000002,<br>126.69250000000001, 126.72000000000001, 126.74750000000002,<br>126.77500000000002, 126.80250000000002, 126.83000000000001,<br>126.85750000000002, 126.88500000000002, 126.91250000000002,<br>126.94000000000001, 126.96750000000002, 126.99500000000002,<br>127.02250000000002, 127.05000000000001, 127.07750000000001,<br>127.10500000000002, 127.13250000000002, 127.16000000000001,<br>127.18750000000001, 127.21500000000002, 127.24250000000002,<br>127.27000000000001, 127.29750000000001, 127.32500000000002,<br>127.35250000000002, 127.38000000000001, 127.40750000000001,<br>127.43500000000002, 127.46250000000002, 127.49000000000002,<br>127.51750000000001, 127.54500000000002, 127.57250000000002,<br>127.60000000000002, 127.62750000000001, 127.65500000000002,<br>127.68250000000002, 127.71000000000002, 127.73750000000001,<br>127.76500000000001, 127.79250000000002, 127.82000000000002,<br>127.84750000000001, 127.87500000000001, 127.90250000000002,<br>127.93000000000002, 127.95750000000001, 127.98500000000001,<br>128.01250000000002, 128.04000000000002, 128.06750000000002,<br>128.09500000000003, 128.12250000000003, 128.15, 128.1775, 128.205,<br>128.23250000000002, 128.26000000000002, 128.28750000000002,<br>128.31500000000003, 128.34250000000003, 128.37, 128.3975, 128.425,<br>128.45250000000001, 128.48000000000002, 128.50750000000002,<br>128.53500000000003, 128.56250000000003, 128.59, 128.6175, 128.645,<br>128.6725, 128.70000000000002, 128.72750000000002,<br>128.75500000000002, 128.78250000000003, 128.81000000000003,<br>128.8375, 128.865, 128.8925, 128.92000000000002, 128.94750000000002,<br>128.97500000000002, 129.00250000000003, 129.03000000000003,<br>129.0575, 129.085, 129.1125, 129.14000000000001, 129.16750000000002,<br>129.19500000000002, 129.22250000000003, 129.25000000000003,<br>129.2775, 129.305, 129.3325, 129.36, 129.38750000000002,<br>129.41500000000002, 129.44250000000002, 129.47000000000003,<br>129.49750000000003, 129.525, 129.5525, 129.58, 129.60750000000002,<br>129.63500000000002, 129.66250000000002, 129.69000000000003,<br>129.71750000000003, 129.745, 129.7725, 129.8, 129.82750000000001,<br>129.85500000000002, 129.88250000000002, 129.91000000000003,<br>129.93750000000003, 129.965, 129.9925, 130.02, 130.0475,<br>130.07500000000002, 130.10250000000002, 130.13000000000002,<br>130.15750000000003, 130.18500000000003, 130.2125, 130.24, 130.2675,<br>130.29500000000002, 130.32250000000002, 130.35000000000002,<br>130.37750000000003, 130.40500000000003, 130.4325, 130.46, 130.4875,<br>130.51500000000001, 130.54250000000002, 130.57000000000002,<br>130.59750000000003, 130.62500000000003, 130.6525, 130.68, 130.7075,<br>130.735, 130.76250000000002, 130.79000000000002, |



| Description | Value                                                                                                                                                                                                                                                                                                                                                                                                                                                                                                                                                                                                                                                                                                                                                                                                                                                                                                                                                                                                                                                                                                                                                                                                                                                                                                                                                                                                                                                                                                                                                                                                                                                                                                                                                                                                                                                                                                                                                                                                                                                                                                                                                                                                                                                                                                                                                                                                                                                                                                                                                                                                                                                                                                                                                                                                                                                                                                                                                                                                                                                                                                                                                                                                                                                                                                          |
|-------------|----------------------------------------------------------------------------------------------------------------------------------------------------------------------------------------------------------------------------------------------------------------------------------------------------------------------------------------------------------------------------------------------------------------------------------------------------------------------------------------------------------------------------------------------------------------------------------------------------------------------------------------------------------------------------------------------------------------------------------------------------------------------------------------------------------------------------------------------------------------------------------------------------------------------------------------------------------------------------------------------------------------------------------------------------------------------------------------------------------------------------------------------------------------------------------------------------------------------------------------------------------------------------------------------------------------------------------------------------------------------------------------------------------------------------------------------------------------------------------------------------------------------------------------------------------------------------------------------------------------------------------------------------------------------------------------------------------------------------------------------------------------------------------------------------------------------------------------------------------------------------------------------------------------------------------------------------------------------------------------------------------------------------------------------------------------------------------------------------------------------------------------------------------------------------------------------------------------------------------------------------------------------------------------------------------------------------------------------------------------------------------------------------------------------------------------------------------------------------------------------------------------------------------------------------------------------------------------------------------------------------------------------------------------------------------------------------------------------------------------------------------------------------------------------------------------------------------------------------------------------------------------------------------------------------------------------------------------------------------------------------------------------------------------------------------------------------------------------------------------------------------------------------------------------------------------------------------------------------------------------------------------------------------------------------------------|
|             | 130.81750000000002, 130.84500000000003, 130.87250000000003, 130.9,<br>130.9275, 130.955, 130.98250000000002, 131.01000000000002,<br>131.03750000000002, 131.06500000000003, 131.09250000000003, 131.12,<br>131.1475, 131.175, 131.20250000000001, 131.23000000000002,<br>131.25750000000002, 131.28500000000003, 131.31250000000003, 131.34,<br>131.3675, 131.395, 131.4225, 131.45000000000002, 131.47750000000002,<br>131.50500000000002, 131.53250000000003, 131.56000000000003,<br>131.5875, 131.615, 131.6425, 131.67000000000002, 131.69750000000002,<br>131.72500000000002, 131.75250000000003, 131.78000000000003,<br>131.8075, 131.835, 131.8625, 131.89000000000001, 131.91750000000002,<br>131.94500000000002, 131.97250000000003, 132.00000000000003,<br>132.0275, 132.055, 132.0825, 132.11, 132.13750000000002,<br>132.16500000000002, 132.19250000000002, 132.22000000000003,<br>132.24750000000003, 132.275, 132.3025, 132.33, 132.35750000000002,<br>132.38500000000002, 132.41250000000002, 132.44000000000003,<br>132.46750000000003, 132.495, 132.5225, 132.55, 132.57750000000001,<br>132.60500000000002, 132.63250000000002, 132.66000000000003,<br>132.68750000000003, 132.715, 132.7425, 132.77, 132.7975,<br>132.82500000000002, 132.85250000000002, 132.88000000000002,<br>132.90750000000003, 132.93500000000003, 132.9625, 132.99, 133.0175,<br>133.04500000000002, 133.07250000000002, 133.10000000000002,<br>133.12750000000003, 133.15500000000003, 133.1825, 133.21, 133.2375,<br>133.26500000000001, 133.29250000000002, 133.32000000000002,<br>133.34750000000003, 133.37500000000003, 133.4025, 133.43, 133.4575,<br>133.485, 133.51250000000002, 133.54000000000002,<br>133.56750000000002, 133.59500000000003, 133.62250000000003, 133.65,<br>133.6775, 133.705, 133.73250000000002, 133.76000000000002,<br>133.78750000000002, 133.81500000000003, 133.84250000000003, 133.87,<br>133.8975, 133.925, 133.95250000000001, 133.98000000000002,<br>134.00750000000002, 134.03500000000003, 134.06250000000003, 134.09,<br>134.1175, 134.145, 134.1725, 134.20000000000002, 134.22750000000002,<br>134.25500000000002, 134.28250000000003, 134.31000000000003,<br>134.3375, 134.365, 134.3925, 134.42000000000002, 134.44750000000002,<br>134.47500000000002, 134.50250000000003, 134.53000000000003,<br>134.5575, 134.585, 134.6125, 134.64000000000001, 134.66750000000002,<br>134.69500000000002, 134.72250000000003, 134.75000000000003,<br>134.77750000000003, 134.805, 134.8325, 134.86, 134.88750000000002,<br>134.91500000000002, 134.94250000000002, 134.97000000000003,<br>134.99750000000003, 135.025, 135.0525, 135.08, 135.10750000000002,<br>135.13500000000002, 135.16250000000002, 135.19000000000003,<br>135.21750000000003, 135.245, 135.2725, 135.3, 135.32750000000001,<br>135.35500000000002, 135.38250000000002, 135.41000000000003,<br>135.43750000000003, 135.46500000000003, 135.4925, 135.52, 135.5475,<br>135.57500000000002, 135.60250000000002, 135.63000000000002,<br>135.65750000000003, 135.68500000000003, 135.7125, 135.74, 135.7675,<br>135.79500000000002, 135.82250000000002, 135.85000000000002,<br>135.87750000000003, 135.90500000000003, 135.9325, 135.96, 135.9875,<br>136.01500000000001, 136.04250000000002, 136.07000000000002, |

| Description | Value                                                                                                                                                                                                                                                                                                                                                                                                                                                                                                                                                                                                                                                                                                                                                                                                                                                                                                                                                                                                                                                                                                                                                                                                                                                                                                                                                                                                                                                                                                                                                                                                                                                                                                                                                                                                                                                                                                                                                                                                                                                                                                                                                                                                                                                                                                                                                                                                                                                                                                                                                                                                                                                                                                                                                                                                                                                                                                                                                                                                                                                                                                                                                                                                                                                                                                                        |
|-------------|------------------------------------------------------------------------------------------------------------------------------------------------------------------------------------------------------------------------------------------------------------------------------------------------------------------------------------------------------------------------------------------------------------------------------------------------------------------------------------------------------------------------------------------------------------------------------------------------------------------------------------------------------------------------------------------------------------------------------------------------------------------------------------------------------------------------------------------------------------------------------------------------------------------------------------------------------------------------------------------------------------------------------------------------------------------------------------------------------------------------------------------------------------------------------------------------------------------------------------------------------------------------------------------------------------------------------------------------------------------------------------------------------------------------------------------------------------------------------------------------------------------------------------------------------------------------------------------------------------------------------------------------------------------------------------------------------------------------------------------------------------------------------------------------------------------------------------------------------------------------------------------------------------------------------------------------------------------------------------------------------------------------------------------------------------------------------------------------------------------------------------------------------------------------------------------------------------------------------------------------------------------------------------------------------------------------------------------------------------------------------------------------------------------------------------------------------------------------------------------------------------------------------------------------------------------------------------------------------------------------------------------------------------------------------------------------------------------------------------------------------------------------------------------------------------------------------------------------------------------------------------------------------------------------------------------------------------------------------------------------------------------------------------------------------------------------------------------------------------------------------------------------------------------------------------------------------------------------------------------------------------------------------------------------------------------------------|
|             | 136.09750000000003, 136.12500000000003, 136.15250000000003, 136.18,<br>136.2075, 136.235, 136.26250000000002, 136.29000000000002,<br>136.31750000000002, 136.34500000000003, 136.37250000000003, 136.4,<br>136.4275, 136.455, 136.48250000000002, 136.51000000000002,<br>136.53750000000002, 136.56500000000003, 136.59250000000003, 136.62,<br>136.6475, 136.675, 136.70250000000001, 136.73000000000002,<br>136.75750000000002, 136.78500000000003, 136.81250000000003,<br>136.84000000000003, 136.8675, 136.895, 136.9225, 136.95000000000002,<br>136.97750000000002, 137.00500000000002, 137.03250000000003,<br>137.06000000000003, 137.0875, 137.115, 137.1425, 137.17000000000002,<br>137.19750000000002, 137.22500000000002, 137.25250000000003,<br>137.28000000000003, 137.3075, 137.335, 137.3625, 137.39000000000001,<br>137.41750000000002, 137.44500000000002, 137.47250000000003,<br>137.50000000000003, 137.52750000000003, 137.555, 137.5825, 137.61,<br>137.63750000000002, 137.66500000000002, 137.69250000000002,<br>137.72000000000003, 137.74750000000003, 137.775, 137.8025, 137.83,<br>137.85750000000002, 137.88500000000002, 137.91250000000002,<br>137.94000000000003, 137.96750000000003, 137.995, 138.0225, 138.05,<br>138.07750000000001, 138.10500000000002, 138.13250000000002,<br>138.16000000000003, 138.18750000000003, 138.21500000000003,<br>138.2425, 138.27, 138.2975, 138.32500000000002, 138.35250000000002,<br>138.38000000000002, 138.40750000000003, 138.43500000000003,<br>138.4625, 138.49, 138.5175, 138.54500000000002, 138.57250000000002,<br>138.60000000000002, 138.62750000000003, 138.65500000000003,<br>138.6825, 138.71, 138.7375, 138.76500000000001, 138.79250000000002,<br>138.82000000000002, 138.84750000000003, 138.87500000000003,<br>138.90250000000003, 138.93, 138.9575, 138.985, 139.01250000000002,<br>139.04000000000002, 139.06750000000002, 139.09500000000003,<br>139.12250000000003, 139.15, 139.1775, 139.205, 139.23250000000002,<br>139.26000000000002, 139.28750000000002, 139.31500000000003,<br>139.34250000000003, 139.37, 139.3975, 139.425, 139.45250000000001,<br>139.48000000000002, 139.50750000000002, 139.53500000000003,<br>139.56250000000003, 139.59000000000003, 139.6175, 139.645, 139.6725,<br>139.70000000000002, 139.72750000000002, 139.75500000000002,<br>139.78250000000003, 139.81000000000003, 139.8375, 139.865, 139.8925,<br>139.92000000000002, 139.94750000000002, 139.97500000000002,<br>140.00250000000003, 140.03000000000003, 140.0575, 140.085, 140.1125,<br>140.14000000000001, 140.16750000000002, 140.19500000000002,<br>140.22250000000003, 140.25000000000003, 140.27750000000003,<br>140.305, 140.3325, 140.36, 140.38750000000002, 140.41500000000002,<br>140.44250000000002, 140.47000000000003, 140.49750000000003,<br>140.525, 140.5525, 140.58, 140.60750000000002, 140.63500000000002,<br>140.66250000000002, 140.69000000000003, 140.71750000000003,<br>140.745, 140.7725, 140.8, 140.82750000000001, 140.85500000000002,<br>140.88250000000002, 140.91000000000003, 140.93750000000003,<br>140.96500000000003, 140.9925, 141.02, 141.0475, 141.07500000000002,<br>141.10250000000002, 141.13000000000002, 141.15750000000003,<br>141.18500000000003, 141.2125, 141.24, 141.2675, 141.29500000000002, |

| Description | Value                                                                                                                                                                                                                                                                                                                                                                                                                                                                                                                                                                                                                                                                                                                                                                                                                                                                                                                                                                                                                                                                                                                                                                                                                                                                                                                                                                                                                                                                                                                                                                                                                                                                                                                                                                                                                                                                                                                                                                                                                                                                                                                                                                                                                                                                                                                                                                                                                                                                                                                                                                                                                                                                                                                                                                                                                                                                                                                                                                                                                                                                                                                                                                                                                                                                  |
|-------------|------------------------------------------------------------------------------------------------------------------------------------------------------------------------------------------------------------------------------------------------------------------------------------------------------------------------------------------------------------------------------------------------------------------------------------------------------------------------------------------------------------------------------------------------------------------------------------------------------------------------------------------------------------------------------------------------------------------------------------------------------------------------------------------------------------------------------------------------------------------------------------------------------------------------------------------------------------------------------------------------------------------------------------------------------------------------------------------------------------------------------------------------------------------------------------------------------------------------------------------------------------------------------------------------------------------------------------------------------------------------------------------------------------------------------------------------------------------------------------------------------------------------------------------------------------------------------------------------------------------------------------------------------------------------------------------------------------------------------------------------------------------------------------------------------------------------------------------------------------------------------------------------------------------------------------------------------------------------------------------------------------------------------------------------------------------------------------------------------------------------------------------------------------------------------------------------------------------------------------------------------------------------------------------------------------------------------------------------------------------------------------------------------------------------------------------------------------------------------------------------------------------------------------------------------------------------------------------------------------------------------------------------------------------------------------------------------------------------------------------------------------------------------------------------------------------------------------------------------------------------------------------------------------------------------------------------------------------------------------------------------------------------------------------------------------------------------------------------------------------------------------------------------------------------------------------------------------------------------------------------------------------------|
|             | 141.32250000000002, 141.35000000000002, 141.37750000000003,<br>141.40500000000003, 141.4325, 141.46, 141.4875, 141.51500000000001,<br>141.54250000000002, 141.57000000000002, 141.59750000000003,<br>141.62500000000003, 141.65250000000003, 141.68, 141.7075, 141.735,<br>141.76250000000002, 141.79000000000002, 141.81750000000002,<br>141.84500000000003, 141.87250000000003, 141.9, 141.9275, 141.955,<br>141.98250000000002, 142.01000000000002, 142.03750000000002,<br>142.06500000000003, 142.09250000000003, 142.12, 142.1475, 142.175,<br>142.20250000000001, 142.23000000000002, 142.25750000000002,<br>142.28500000000003, 142.31250000000003, 142.34000000000003,<br>142.3675, 142.395, 142.4225, 142.45000000000002, 142.47750000000002,<br>142.50500000000002, 142.53250000000003, 142.56000000000003,<br>142.5875, 142.615, 142.6425, 142.67000000000002, 142.69750000000002,<br>142.72500000000002, 142.75250000000003, 142.78000000000003,<br>142.8075, 142.835, 142.8625, 142.89000000000001, 142.91750000000002,<br>142.94500000000002, 142.97250000000003, 143.00000000000003,<br>143.02750000000003, 143.055, 143.0825, 143.11, 143.13750000000002,<br>143.16500000000002, 143.19250000000002, 143.22000000000003,<br>143.24750000000003, 143.275, 143.3025, 143.33, 143.35750000000002,<br>143.38500000000002, 143.41250000000002, 143.44000000000003,<br>143.46750000000003, 143.49500000000003, 143.5225, 143.55,<br>143.57750000000001, 143.60500000000002, 143.63250000000002,<br>143.66000000000003, 143.68750000000003, 143.71500000000003,<br>143.7425, 143.77, 143.7975, 143.82500000000002, 143.85250000000002,<br>143.88000000000002, 143.90750000000003, 143.93500000000003,<br>143.9625, 143.99, 144.0175, 144.04500000000002, 144.07250000000002,<br>144.10000000000002, 144.12750000000003, 144.15500000000003,<br>144.18250000000003, 144.21, 144.2375, 144.26500000000001,<br>144.29250000000002, 144.32000000000002, 144.34750000000003,<br>144.37500000000003, 144.40250000000003, 144.43, 144.4575, 144.485,<br>144.51250000000002, 144.54000000000002, 144.56750000000002,<br>144.59500000000003, 144.62250000000003, 144.65, 144.6775, 144.705,<br>144.73250000000002, 144.76000000000002, 144.78750000000002,<br>144.81500000000003, 144.84250000000003, 144.87000000000003,<br>144.8975, 144.925, 144.95250000000001, 144.98000000000002,<br>145.00750000000002, 145.03500000000003, 145.06250000000003,<br>145.09000000000003, 145.1175, 145.145, 145.1725, 145.20000000000002,<br>145.22750000000002, 145.25500000000002, 145.28250000000003,<br>145.31000000000003, 145.3375, 145.365, 145.3925, 145.42000000000002,<br>145.44750000000002, 145.47500000000002, 145.50250000000003,<br>145.53000000000003, 145.55750000000003, 145.585, 145.6125,<br>145.64000000000001, 145.66750000000002, 145.69500000000002,<br>145.72250000000003, 145.75000000000003, 145.77750000000003,<br>145.805, 145.8325, 145.86, 145.88750000000002, 145.91500000000002,<br>145.94250000000002, 145.97000000000003, 145.99750000000003,<br>146.025, 146.0525, 146.08, 146.10750000000002, 146.13500000000002,<br>146.16250000000002, 146.19000000000003, 146.21750000000003,<br>146.24500000000003, 146.2725, 146.3, 146.32750000000001, |

| Description | Value                                                                                                                                                                                                                                                                                                                                                                                                                                                                                                                                                                                                                                                                                                                                                                                                                                                                                                                                                                                                                                                                                                                                                                                                                                                                                                                                                                                                                                                                                                                                                                                                                                                                                                                                                                                                                                                                                                                                                                                                                                                                                                                                                                                                                                                                                                                                                                                                                                                                                                                                                                                                                                                                                                                                                                                                                                                                                                                                                                                                                                                                                                                                                                                                                                           |
|-------------|-------------------------------------------------------------------------------------------------------------------------------------------------------------------------------------------------------------------------------------------------------------------------------------------------------------------------------------------------------------------------------------------------------------------------------------------------------------------------------------------------------------------------------------------------------------------------------------------------------------------------------------------------------------------------------------------------------------------------------------------------------------------------------------------------------------------------------------------------------------------------------------------------------------------------------------------------------------------------------------------------------------------------------------------------------------------------------------------------------------------------------------------------------------------------------------------------------------------------------------------------------------------------------------------------------------------------------------------------------------------------------------------------------------------------------------------------------------------------------------------------------------------------------------------------------------------------------------------------------------------------------------------------------------------------------------------------------------------------------------------------------------------------------------------------------------------------------------------------------------------------------------------------------------------------------------------------------------------------------------------------------------------------------------------------------------------------------------------------------------------------------------------------------------------------------------------------------------------------------------------------------------------------------------------------------------------------------------------------------------------------------------------------------------------------------------------------------------------------------------------------------------------------------------------------------------------------------------------------------------------------------------------------------------------------------------------------------------------------------------------------------------------------------------------------------------------------------------------------------------------------------------------------------------------------------------------------------------------------------------------------------------------------------------------------------------------------------------------------------------------------------------------------------------------------------------------------------------------------------------------------|
|             | 146.35500000000002, 146.38250000000002, 146.41000000000003,<br>146.43750000000003, 146.46500000000003, 146.4925, 146.52, 146.5475,<br>146.57500000000002, 146.60250000000002, 146.63000000000002,<br>146.65750000000003, 146.68500000000003, 146.7125, 146.74, 146.7675,<br>146.79500000000002, 146.82250000000002, 146.85000000000002,<br>146.87750000000003, 146.90500000000003, 146.93250000000003, 146.96,<br>146.9875, 147.01500000000001, 147.04250000000002,<br>147.07000000000002, 147.09750000000003, 147.12500000000003,<br>147.15250000000003, 147.18, 147.2075, 147.235, 147.26250000000002,<br>147.29000000000002, 147.31750000000002, 147.34500000000003,<br>147.37250000000003, 147.4, 147.4275, 147.455, 147.48250000000002,<br>147.51000000000002, 147.53750000000002, 147.56500000000003,<br>147.59250000000003, 147.62000000000003, 147.6475, 147.675,<br>147.70250000000001, 147.73000000000002, 147.75750000000002,<br>147.78500000000003, 147.81250000000003, 147.84000000000003,<br>147.8675, 147.895, 147.9225, 147.95000000000002, 147.97750000000002,<br>148.00500000000002, 148.03250000000003, 148.06000000000003,<br>148.0875, 148.115, 148.1425, 148.17000000000002, 148.19750000000002,<br>148.22500000000002, 148.25250000000003, 148.28000000000003,<br>148.30750000000003, 148.335, 148.3625, 148.39000000000001,<br>148.41750000000002, 148.44500000000002, 148.47250000000003,<br>148.50000000000003, 148.52750000000003, 148.555, 148.5825, 148.61,<br>148.63750000000002, 148.66500000000002, 148.69250000000002,<br>148.72000000000003, 148.74750000000003, 148.775, 148.8025, 148.83,<br>148.85750000000002, 148.88500000000002, 148.91250000000002,<br>148.94000000000003, 148.96750000000003, 148.99500000000003,<br>149.0225, 149.05, 149.07750000000001, 149.10500000000002,<br>149.13250000000002, 149.16000000000003, 149.18750000000003,<br>149.21500000000003, 149.2425, 149.27, 149.2975, 149.32500000000002,<br>149.35250000000002, 149.38000000000002, 149.40750000000003,<br>149.43500000000003, 149.4625, 149.49, 149.5175, 149.54500000000002,<br>149.57250000000002, 149.60000000000002, 149.62750000000003,<br>149.65500000000003, 149.68250000000003, 149.71, 149.7375,<br>149.76500000000001, 149.79250000000002, 149.82000000000002,<br>149.84750000000003, 149.87500000000003, 149.90250000000003, 149.93,<br>149.9575, 149.985, 150.01250000000002, 150.04000000000002,<br>150.06750000000002, 150.09500000000003, 150.12250000000003, 150.15,<br>150.1775, 150.205, 150.23250000000002, 150.26000000000002,<br>150.28750000000002, 150.31500000000003, 150.34250000000003,<br>150.37000000000003, 150.3975, 150.425, 150.45250000000001,<br>150.48000000000002, 150.50750000000002, 150.53500000000003,<br>150.56250000000003, 150.59000000000003, 150.6175, 150.645, 150.6725,<br>150.70000000000002, 150.72750000000002, 150.75500000000002,<br>150.78250000000003, 150.81000000000003, 150.8375, 150.865, 150.8925,<br>150.92000000000002, 150.94750000000002, 150.97500000000002,<br>151.00250000000003, 151.03000000000003, 151.05750000000003,<br>151.085, 151.1125, 151.14000000000001, 151.16750000000002,<br>151.19500000000002, 151.22250000000003, 151.25000000000003, |

| Description | Value                                                                                                                                                                                                                                                                                                                                                                                                                                                                                                                                                                                                                                                                                                                                                                                                                                                                                                                                                                                                                                                                                                                                                                                                                                                                                                                                                                                                                                                                                                                                                                                                                                                                                                                                                                                                                                                                                                                                                                                                                                                                                                                                                                                                                                                                                                                                                                                                                                                                                                                                                                                                                                                                                                                                                                                                                                                                                                                                                                                                                                                                                                                                                                               |
|-------------|-------------------------------------------------------------------------------------------------------------------------------------------------------------------------------------------------------------------------------------------------------------------------------------------------------------------------------------------------------------------------------------------------------------------------------------------------------------------------------------------------------------------------------------------------------------------------------------------------------------------------------------------------------------------------------------------------------------------------------------------------------------------------------------------------------------------------------------------------------------------------------------------------------------------------------------------------------------------------------------------------------------------------------------------------------------------------------------------------------------------------------------------------------------------------------------------------------------------------------------------------------------------------------------------------------------------------------------------------------------------------------------------------------------------------------------------------------------------------------------------------------------------------------------------------------------------------------------------------------------------------------------------------------------------------------------------------------------------------------------------------------------------------------------------------------------------------------------------------------------------------------------------------------------------------------------------------------------------------------------------------------------------------------------------------------------------------------------------------------------------------------------------------------------------------------------------------------------------------------------------------------------------------------------------------------------------------------------------------------------------------------------------------------------------------------------------------------------------------------------------------------------------------------------------------------------------------------------------------------------------------------------------------------------------------------------------------------------------------------------------------------------------------------------------------------------------------------------------------------------------------------------------------------------------------------------------------------------------------------------------------------------------------------------------------------------------------------------------------------------------------------------------------------------------------------------|
|             | 151.27750000000003, 151.305, 151.3325, 151.36, 151.38750000000002,<br>151.41500000000002, 151.44250000000002, 151.47000000000003,<br>151.49750000000003, 151.525, 151.5525, 151.58, 151.60750000000002,<br>151.63500000000002, 151.66250000000002, 151.69000000000003,<br>151.71750000000003, 151.74500000000003, 151.7725, 151.8,<br>151.82750000000001, 151.85500000000002, 151.88250000000002,<br>151.91000000000003, 151.93750000000003, 151.96500000000003,<br>151.9925, 152.02, 152.0475, 152.07500000000002, 152.10250000000002,<br>152.13000000000002, 152.15750000000003, 152.18500000000003,<br>152.21250000000003, 152.24, 152.2675, 152.29500000000002,<br>152.32250000000002, 152.35000000000002, 152.37750000000003,<br>152.40500000000003, 152.43250000000003, 152.46, 152.4875,<br>152.51500000000001, 152.54250000000002, 152.57000000000002,<br>152.59750000000003, 152.62500000000003, 152.65250000000003, 152.68,<br>152.7075, 152.735, 152.76250000000002, 152.79000000000002,<br>152.81750000000002, 152.84500000000003, 152.87250000000003,<br>152.90000000000003, 152.9275, 152.955, 152.98250000000002,<br>153.01000000000002, 153.03750000000002, 153.06500000000003,<br>153.09250000000003, 153.12000000000003, 153.1475, 153.175,<br>153.20250000000001, 153.23000000000002, 153.25750000000002,<br>153.28500000000003, 153.31250000000003, 153.34000000000003,<br>153.3675, 153.395, 153.4225, 153.45000000000002, 153.47750000000002,<br>153.50500000000002, 153.53250000000003, 153.56000000000003,<br>153.58750000000003, 153.615, 153.6425, 153.67000000000002,<br>153.69750000000002, 153.72500000000002, 153.75250000000003,<br>153.78000000000003, 153.80750000000003, 153.835, 153.8625,<br>153.89000000000001, 153.91750000000002, 153.94500000000002,<br>153.97250000000003, 154.00000000000003, 154.02750000000003,<br>154.055, 154.0825, 154.11, 154.13750000000002, 154.16500000000002,<br>154.19250000000002, 154.22000000000003, 154.24750000000003,<br>154.27500000000003, 154.3025, 154.33, 154.35750000000002,<br>154.38500000000002, 154.41250000000002, 154.44000000000003,<br>154.46750000000003, 154.49500000000003, 154.5225, 154.55,<br>154.57750000000001, 154.60500000000002, 154.63250000000002,<br>154.66000000000003, 154.68750000000003, 154.71500000000003,<br>154.7425, 154.77, 154.7975, 154.82500000000002, 154.85250000000002,<br>154.88000000000002, 154.90750000000003, 154.93500000000003,<br>154.96250000000003, 154.99, 155.0175, 155.04500000000002,<br>155.07250000000002, 155.10000000000002, 155.12750000000003,<br>155.15500000000003, 155.18250000000003, 155.21, 155.2375,<br>155.26500000000001, 155.29250000000002, 155.32000000000002,<br>155.34750000000003, 155.37500000000003, 155.40250000000003, 155.43,<br>155.4575, 155.485, 155.51250000000002, 155.54000000000002,<br>155.56750000000002, 155.59500000000003, 155.62250000000003,<br>155.65000000000003, 155.6775, 155.705, 155.73250000000002,<br>155.76000000000002, 155.78750000000002, 155.81500000000003,<br>155.84250000000003, 155.87000000000003, 155.8975, 155.925,<br>155.95250000000001, 155.98000000000002, 156.00750000000002, |

| Description | Value                                                                                                                                                                                                                                                                                                                                                                                                                                                                                                                                                                                                                                                                                                                                                                                                                                                                                                                                                                                                                                                                                                                                                                                                                                                                                                                                                                                                                                                                                                                                                                                                                                                                                                                                                                                                                                                                                                                                                                                                                                                                                                                                                                                                                                                                                                                                                                                                                                                                                                                                                                                                                                                                                                                                                                                                                                                                                                                                                                                                                                                                                                                                                                        |
|-------------|------------------------------------------------------------------------------------------------------------------------------------------------------------------------------------------------------------------------------------------------------------------------------------------------------------------------------------------------------------------------------------------------------------------------------------------------------------------------------------------------------------------------------------------------------------------------------------------------------------------------------------------------------------------------------------------------------------------------------------------------------------------------------------------------------------------------------------------------------------------------------------------------------------------------------------------------------------------------------------------------------------------------------------------------------------------------------------------------------------------------------------------------------------------------------------------------------------------------------------------------------------------------------------------------------------------------------------------------------------------------------------------------------------------------------------------------------------------------------------------------------------------------------------------------------------------------------------------------------------------------------------------------------------------------------------------------------------------------------------------------------------------------------------------------------------------------------------------------------------------------------------------------------------------------------------------------------------------------------------------------------------------------------------------------------------------------------------------------------------------------------------------------------------------------------------------------------------------------------------------------------------------------------------------------------------------------------------------------------------------------------------------------------------------------------------------------------------------------------------------------------------------------------------------------------------------------------------------------------------------------------------------------------------------------------------------------------------------------------------------------------------------------------------------------------------------------------------------------------------------------------------------------------------------------------------------------------------------------------------------------------------------------------------------------------------------------------------------------------------------------------------------------------------------------------|
|             | 156.03500000000003, 156.06250000000003, 156.09000000000003,<br>156.1175, 156.145, 156.1725, 156.20000000000002, 156.22750000000002,<br>156.25500000000002, 156.28250000000003, 156.31000000000003,<br>156.33750000000003, 156.365, 156.3925, 156.42000000000002,<br>156.44750000000002, 156.47500000000002, 156.50250000000003,<br>156.53000000000003, 156.55750000000003, 156.585, 156.6125,<br>156.64000000000001, 156.66750000000002, 156.69500000000002,<br>156.72250000000003, 156.75000000000003, 156.77750000000003,<br>156.805, 156.8325, 156.86, 156.88750000000002, 156.91500000000002,<br>156.94250000000002, 156.97000000000003, 156.99750000000003,<br>157.02500000000003, 157.0525, 157.08, 157.10750000000002,<br>157.13500000000002, 157.16250000000002, 157.19000000000003,<br>157.21750000000003, 157.24500000000003, 157.2725, 157.3,<br>157.32750000000001, 157.35500000000002, 157.38250000000002,<br>157.41000000000003, 157.43750000000003, 157.46500000000003,<br>157.4925, 157.52, 157.5475, 157.57500000000002, 157.60250000000002,<br>157.63000000000002, 157.65750000000003, 157.68500000000003,<br>157.71250000000003, 157.74, 157.7675, 157.79500000000002,<br>157.82250000000002, 157.85000000000002, 157.87750000000003,<br>157.90500000000003, 157.93250000000003, 157.96, 157.9875,<br>158.01500000000001, 158.04250000000002, 158.07000000000002,<br>158.09750000000003, 158.12500000000003, 158.15250000000003, 158.18,<br>158.2075, 158.235, 158.26250000000002, 158.29000000000002,<br>158.31750000000002, 158.34500000000003, 158.37250000000003,<br>158.40000000000003, 158.4275, 158.455, 158.48250000000002,<br>158.51000000000002, 158.53750000000002, 158.56500000000003,<br>158.59250000000003, 158.62000000000003, 158.6475, 158.675,<br>158.70250000000001, 158.73000000000002, 158.75750000000002,<br>158.78500000000003, 158.81250000000003, 158.84000000000003,<br>158.8675, 158.895, 158.9225, 158.95000000000002, 158.97750000000002,<br>159.00500000000002, 159.03250000000003, 159.06000000000003,<br>159.08750000000003, 159.115, 159.1425, 159.17000000000002,<br>159.19750000000002, 159.22500000000002, 159.25250000000003,<br>159.28000000000003, 159.30750000000003, 159.335, 159.3625,<br>159.39000000000001, 159.41750000000002, 159.44500000000002,<br>159.47250000000003, 159.50000000000003, 159.52750000000003,<br>159.555, 159.5825, 159.61, 159.63750000000002, 159.66500000000002,<br>159.69250000000002, 159.72000000000003, 159.74750000000003,<br>159.77500000000003, 159.8025, 159.83, 159.85750000000002,<br>159.88500000000002, 159.91250000000002, 159.94000000000003,<br>159.96750000000003, 159.99500000000003, 160.0225, 160.05,<br>160.07750000000001, 160.10500000000002, 160.13250000000002,<br>160.16000000000003, 160.18750000000003, 160.21500000000003,<br>160.2425, 160.27, 160.2975, 160.32500000000002, 160.35250000000002,<br>160.38000000000002, 160.40750000000003, 160.43500000000003,<br>160.46250000000003, 160.49, 160.5175, 160.54500000000002,<br>160.57250000000002, 160.60000000000002, 160.62750000000003,<br>160.65500000000003, 160.68250000000003, 160.71, 160.7375, |

| Description | Value                                                                                                                                                                                                                                                                                                                                                                                                                                                                                                                                                                                                                                                                                                                                                                                                                                                                                                                                                                                                                                                                                                                                                                                                                                                                                                                                                                                                                                                                                                                                                                                                                                                                                                                                                                                                                                                                                                                                                                                                                                                                                                                                                                                                                                                                                                                                                                                                                                                                                                                                                                                                                                                                                                                                                                                                                                                                                                                                                                                                                                                                                                             |
|-------------|-------------------------------------------------------------------------------------------------------------------------------------------------------------------------------------------------------------------------------------------------------------------------------------------------------------------------------------------------------------------------------------------------------------------------------------------------------------------------------------------------------------------------------------------------------------------------------------------------------------------------------------------------------------------------------------------------------------------------------------------------------------------------------------------------------------------------------------------------------------------------------------------------------------------------------------------------------------------------------------------------------------------------------------------------------------------------------------------------------------------------------------------------------------------------------------------------------------------------------------------------------------------------------------------------------------------------------------------------------------------------------------------------------------------------------------------------------------------------------------------------------------------------------------------------------------------------------------------------------------------------------------------------------------------------------------------------------------------------------------------------------------------------------------------------------------------------------------------------------------------------------------------------------------------------------------------------------------------------------------------------------------------------------------------------------------------------------------------------------------------------------------------------------------------------------------------------------------------------------------------------------------------------------------------------------------------------------------------------------------------------------------------------------------------------------------------------------------------------------------------------------------------------------------------------------------------------------------------------------------------------------------------------------------------------------------------------------------------------------------------------------------------------------------------------------------------------------------------------------------------------------------------------------------------------------------------------------------------------------------------------------------------------------------------------------------------------------------------------------------------|
|             | 160.76500000000001, 160.79250000000002, 160.82000000000002,<br>160.84750000000003, 160.87500000000003, 160.90250000000003,<br>160.93000000000004, 160.9575, 160.985, 161.01250000000002,<br>161.04000000000002, 161.06750000000002, 161.09500000000003,<br>161.12250000000003, 161.15000000000003, 161.1775, 161.205,<br>161.23250000000002, 161.26000000000002, 161.28750000000002,<br>161.31500000000003, 161.34250000000003, 161.37000000000003,<br>161.3975, 161.425, 161.45250000000001, 161.48000000000002,<br>161.50750000000002, 161.53500000000003, 161.56250000000003,<br>161.59000000000003, 161.61750000000004, 161.645, 161.6725,<br>161.70000000000002, 161.72750000000002, 161.75500000000002,<br>161.78250000000003, 161.81000000000003, 161.83750000000003,<br>161.865, 161.8925, 161.92000000000002, 161.94750000000002,<br>161.97500000000002, 162.00250000000003, 162.03000000000003,<br>162.05750000000003, 162.085, 162.1125, 162.14000000000001,<br>162.16750000000002, 162.19500000000002, 162.22250000000003,<br>162.25000000000003, 162.27750000000003, 162.30500000000004,<br>162.3325, 162.36, 162.38750000000002, 162.41500000000002,<br>162.44250000000002, 162.47000000000003, 162.49750000000003,<br>162.52500000000003, 162.5525, 162.58, 162.60750000000002,<br>162.63500000000002, 162.66250000000002, 162.69000000000003,<br>162.71750000000003, 162.74500000000003, 162.7725, 162.8,<br>162.82750000000001, 162.85500000000002, 162.88250000000002,<br>162.91000000000003, 162.93750000000003, 162.96500000000003,<br>162.99250000000004, 163.02, 163.0475, 163.07500000000002,<br>163.10250000000002, 163.13000000000002, 163.15750000000003,<br>163.18500000000003, 163.21250000000003, 163.24, 163.2675,<br>163.29500000000002, 163.32250000000002, 163.35000000000002,<br>163.37750000000003, 163.40500000000003, 163.43250000000003, 163.46,<br>163.4875, 163.51500000000001, 163.54250000000002,<br>163.57000000000002, 163.59750000000003, 163.62500000000003,<br>163.65250000000003, 163.68000000000004, 163.7075, 163.735,<br>163.76250000000002, 163.79000000000002, 163.81750000000002,<br>163.84500000000003, 163.87250000000003, 163.90000000000003,<br>163.9275, 163.955, 163.98250000000002, 164.01000000000002,<br>164.03750000000002, 164.06500000000003, 164.09250000000003,<br>164.12000000000003, 164.1475, 164.175, 164.20250000000001,<br>164.23000000000002, 164.25750000000002, 164.28500000000003,<br>164.31250000000003, 164.34000000000003, 164.36750000000004,<br>164.395, 164.4225, 164.45000000000002, 164.47750000000002,<br>164.50500000000002, 164.53250000000003, 164.56000000000003,<br>164.58750000000003, 164.615, 164.6425, 164.67000000000002,<br>164.69750000000002, 164.72500000000002, 164.75250000000003,<br>164.78000000000003, 164.80750000000003, 164.835, 164.8625,<br>164.89000000000001, 164.91750000000002, 164.94500000000002,<br>164.97250000000003, 165.00000000000003, 165.02750000000003,<br>165.05500000000004, 165.0825, 165.11, 165.13750000000002,<br>165.16500000000002, 165.19250000000002, 165.22000000000003, |

| Description | Value                                                                                                                                                                                                                                                                                                                                                                                                                                                                                                                                                                                                                                                                                                                                                                                                                                                                                                                                                                                                                                                                                                                                                                                                                                                                                                                                                                                                                                                                                                                                                                                                                                                                                                                                                                                                                                                                                                                                                                                                                                                                                                                                                                                                                                                                                                                                                                                                                                                                                                                                                                                                                                                                                                                                                                                                                                                                                                                                                                                                                                                                                      |
|-------------|--------------------------------------------------------------------------------------------------------------------------------------------------------------------------------------------------------------------------------------------------------------------------------------------------------------------------------------------------------------------------------------------------------------------------------------------------------------------------------------------------------------------------------------------------------------------------------------------------------------------------------------------------------------------------------------------------------------------------------------------------------------------------------------------------------------------------------------------------------------------------------------------------------------------------------------------------------------------------------------------------------------------------------------------------------------------------------------------------------------------------------------------------------------------------------------------------------------------------------------------------------------------------------------------------------------------------------------------------------------------------------------------------------------------------------------------------------------------------------------------------------------------------------------------------------------------------------------------------------------------------------------------------------------------------------------------------------------------------------------------------------------------------------------------------------------------------------------------------------------------------------------------------------------------------------------------------------------------------------------------------------------------------------------------------------------------------------------------------------------------------------------------------------------------------------------------------------------------------------------------------------------------------------------------------------------------------------------------------------------------------------------------------------------------------------------------------------------------------------------------------------------------------------------------------------------------------------------------------------------------------------------------------------------------------------------------------------------------------------------------------------------------------------------------------------------------------------------------------------------------------------------------------------------------------------------------------------------------------------------------------------------------------------------------------------------------------------------------|
|             | 165.24750000000003, 165.27500000000003, 165.3025, 165.33,<br>165.35750000000002, 165.38500000000002, 165.41250000000002,<br>165.44000000000003, 165.46750000000003, 165.49500000000003,<br>165.5225, 165.55, 165.57750000000001, 165.60500000000002,<br>165.63250000000002, 165.66000000000003, 165.68750000000003,<br>165.71500000000003, 165.74250000000004, 165.77, 165.7975,<br>165.82500000000002, 165.85250000000002, 165.88000000000002,<br>165.90750000000003, 165.93500000000003, 165.96250000000003, 165.99,<br>166.0175, 166.04500000000002, 166.07250000000002,<br>166.10000000000002, 166.12750000000003, 166.15500000000003,<br>166.18250000000003, 166.21, 166.2375, 166.26500000000001,<br>166.29250000000002, 166.32000000000002, 166.34750000000003,<br>166.37500000000003, 166.40250000000003, 166.43000000000004,<br>166.4575, 166.485, 166.51250000000002, 166.54000000000002,<br>166.56750000000002, 166.59500000000003, 166.62250000000003,<br>166.65000000000003, 166.6775, 166.705, 166.73250000000002,<br>166.76000000000002, 166.78750000000002, 166.81500000000003,<br>166.84250000000003, 166.87000000000003, 166.8975, 166.925,<br>166.95250000000001, 166.98000000000002, 167.00750000000002,<br>167.03500000000003, 167.06250000000003, 167.09000000000003,<br>167.11750000000004, 167.145, 167.1725, 167.20000000000002,<br>167.22750000000002, 167.25500000000002, 167.28250000000003,<br>167.31000000000003, 167.33750000000003, 167.365, 167.3925,<br>167.42000000000002, 167.44750000000002, 167.47500000000002,<br>167.50250000000003, 167.53000000000003, 167.55750000000003,<br>167.585, 167.6125, 167.64000000000001, 167.66750000000002,<br>167.69500000000002, 167.72250000000003, 167.75000000000003,<br>167.77750000000003, 167.80500000000004, 167.8325, 167.86,<br>167.88750000000002, 167.91500000000002, 167.94250000000002,<br>167.97000000000003, 167.99750000000003, 168.02500000000003,<br>168.0525, 168.08, 168.10750000000002, 168.13500000000002,<br>168.16250000000002, 168.19000000000003, 168.21750000000003,<br>168.24500000000003, 168.2725, 168.3, 168.32750000000001,<br>168.35500000000002, 168.38250000000002, 168.41000000000003,<br>168.43750000000003, 168.46500000000003, 168.49250000000004, 168.52,<br>168.5475, 168.57500000000002, 168.60250000000002,<br>168.63000000000002, 168.65750000000003, 168.68500000000003,<br>168.71250000000003, 168.74, 168.7675, 168.79500000000002,<br>168.82250000000002, 168.85000000000002, 168.87750000000003,<br>168.90500000000003, 168.93250000000003, 168.96000000000004,<br>168.9875, 169.01500000000001, 169.04250000000002,<br>169.07000000000002, 169.09750000000003, 169.12500000000003,<br>169.15250000000003, 169.18000000000004, 169.2075, 169.235,<br>169.26250000000002, 169.29000000000002, 169.31750000000002,<br>169.34500000000003, 169.37250000000003, 169.40000000000003,<br>169.4275, 169.455, 169.48250000000002, 169.51000000000002,<br>169.53750000000002, 169.56500000000003, 169.59250000000003,<br>169.62000000000003, 169.64750000000004, 169.675, |



| Description | Value                                                                                                                                                                                                                                                                                                                                                                                                                                                                                                                                                                                                                                                                                                                                                                                                                                                                                                                                                                                                                                                                                                                                                                                                                                                                                                                                                                                                                                                                                                                                                                                                                                                                                                                                                                                                                                                                                                                                                                                                                                                                                                                                                                                                                                                                                                                                                                                                                                                                                                                                                                                                                                                                                                                                                                                                                                                                                                                                                                                                                                                                                          |
|-------------|------------------------------------------------------------------------------------------------------------------------------------------------------------------------------------------------------------------------------------------------------------------------------------------------------------------------------------------------------------------------------------------------------------------------------------------------------------------------------------------------------------------------------------------------------------------------------------------------------------------------------------------------------------------------------------------------------------------------------------------------------------------------------------------------------------------------------------------------------------------------------------------------------------------------------------------------------------------------------------------------------------------------------------------------------------------------------------------------------------------------------------------------------------------------------------------------------------------------------------------------------------------------------------------------------------------------------------------------------------------------------------------------------------------------------------------------------------------------------------------------------------------------------------------------------------------------------------------------------------------------------------------------------------------------------------------------------------------------------------------------------------------------------------------------------------------------------------------------------------------------------------------------------------------------------------------------------------------------------------------------------------------------------------------------------------------------------------------------------------------------------------------------------------------------------------------------------------------------------------------------------------------------------------------------------------------------------------------------------------------------------------------------------------------------------------------------------------------------------------------------------------------------------------------------------------------------------------------------------------------------------------------------------------------------------------------------------------------------------------------------------------------------------------------------------------------------------------------------------------------------------------------------------------------------------------------------------------------------------------------------------------------------------------------------------------------------------------------------|
|             | 169.70250000000001, 169.73000000000002, 169.75750000000002,<br>169.78500000000003, 169.81250000000003, 169.84000000000003,<br>169.86750000000004, 169.895, 169.9225, 169.95000000000002,<br>169.97750000000002, 170.00500000000002, 170.03250000000003,<br>170.06000000000003, 170.08750000000003, 170.115, 170.1425,<br>170.17000000000002, 170.19750000000002, 170.22500000000002,<br>170.25250000000003, 170.28000000000003, 170.30750000000003,<br>170.33500000000004, 170.3625, 170.39000000000001,<br>170.41750000000002, 170.44500000000002, 170.47250000000003,<br>170.50000000000003, 170.52750000000003, 170.55500000000004,<br>170.5825, 170.61, 170.63750000000002, 170.66500000000002,<br>170.69250000000002, 170.72000000000003, 170.74750000000003,<br>170.77500000000003, 170.8025, 170.83, 170.85750000000002,<br>170.88500000000002, 170.91250000000002, 170.94000000000003,<br>170.96750000000003, 170.99500000000003, 171.02250000000004, 171.05,<br>171.07750000000001, 171.10500000000002, 171.13250000000002,<br>171.16000000000003, 171.18750000000003, 171.21500000000003,<br>171.24250000000004, 171.27, 171.2975, 171.32500000000002,<br>171.35250000000002, 171.38000000000002, 171.40750000000003,<br>171.43500000000003, 171.46250000000003, 171.49, 171.5175,<br>171.54500000000002, 171.57250000000002, 171.60000000000002,<br>171.62750000000003, 171.65500000000003, 171.68250000000003,<br>171.71000000000004, 171.7375, 171.76500000000001,<br>171.79250000000002, 171.82000000000002, 171.84750000000003,<br>171.87500000000003, 171.90250000000003, 171.93000000000004,<br>171.9575, 171.985, 172.01250000000002, 172.04000000000002,<br>172.06750000000002, 172.09500000000003, 172.12250000000003,<br>172.15000000000003, 172.1775, 172.205, 172.23250000000002,<br>172.26000000000002, 172.28750000000002, 172.31500000000003,<br>172.34250000000003, 172.37000000000003, 172.39750000000004,<br>172.425, 172.45250000000001, 172.48000000000002,<br>172.50750000000002, 172.53500000000003, 172.56250000000003,<br>172.59000000000003, 172.61750000000004, 172.645, 172.6725,<br>172.70000000000002, 172.72750000000002, 172.75500000000002,<br>172.78250000000003, 172.81000000000003, 172.83750000000003,<br>172.865, 172.8925, 172.92000000000002, 172.94750000000002,<br>172.97500000000002, 173.00250000000003, 173.03000000000003,<br>173.05750000000003, 173.08500000000004, 173.1125,<br>173.14000000000001, 173.16750000000002, 173.19500000000002,<br>173.22250000000003, 173.25000000000003, 173.27750000000003,<br>173.30500000000004, 173.3325, 173.36, 173.38750000000002,<br>173.41500000000002, 173.44250000000002, 173.47000000000003,<br>173.49750000000003, 173.52500000000003, 173.5525, 173.58,<br>173.60750000000002, 173.63500000000002, 173.66250000000002,<br>173.69000000000003, 173.71750000000003, 173.74500000000003,<br>173.77250000000004, 173.8, 173.82750000000001, 173.85500000000002,<br>173.88250000000002, 173.91000000000003, 173.93750000000003,<br>173.96500000000003, 173.99250000000004, 174.02, 174.0475, |

| Description | Value                                                                                                                                                                                                                                                                                                                                                                                                                                                                                                                                                                                                                                                                                                                                                                                                                                                                                                                                                                                                                                                                                                                                                                                                                                                                                                                                                                                                                                                                                                                                                                                                                                                                                                                                                                                                                                                                                                                                                                                                                                                                                                                                                                                                                                                                                                                                                                                                                                                                                                                                                                                                                                                                                                                                                                                                                                                                                                                                                                                                                                                                 |
|-------------|-----------------------------------------------------------------------------------------------------------------------------------------------------------------------------------------------------------------------------------------------------------------------------------------------------------------------------------------------------------------------------------------------------------------------------------------------------------------------------------------------------------------------------------------------------------------------------------------------------------------------------------------------------------------------------------------------------------------------------------------------------------------------------------------------------------------------------------------------------------------------------------------------------------------------------------------------------------------------------------------------------------------------------------------------------------------------------------------------------------------------------------------------------------------------------------------------------------------------------------------------------------------------------------------------------------------------------------------------------------------------------------------------------------------------------------------------------------------------------------------------------------------------------------------------------------------------------------------------------------------------------------------------------------------------------------------------------------------------------------------------------------------------------------------------------------------------------------------------------------------------------------------------------------------------------------------------------------------------------------------------------------------------------------------------------------------------------------------------------------------------------------------------------------------------------------------------------------------------------------------------------------------------------------------------------------------------------------------------------------------------------------------------------------------------------------------------------------------------------------------------------------------------------------------------------------------------------------------------------------------------------------------------------------------------------------------------------------------------------------------------------------------------------------------------------------------------------------------------------------------------------------------------------------------------------------------------------------------------------------------------------------------------------------------------------------------------|
|             | 174.07500000000002, 174.10250000000002, 174.13000000000002,<br>174.15750000000003, 174.18500000000003, 174.21250000000003, 174.24,<br>174.2675, 174.29500000000002, 174.32250000000002,<br>174.35000000000002, 174.37750000000003, 174.40500000000003,<br>174.43250000000003, 174.46000000000004, 174.4875,<br>174.51500000000001, 174.54250000000002, 174.57000000000002,<br>174.59750000000003, 174.62500000000003, 174.65250000000003,<br>174.68000000000004, 174.7075, 174.735, 174.76250000000002,<br>174.79000000000002, 174.81750000000002, 174.84500000000003,<br>174.87250000000003, 174.90000000000003, 174.9275, 174.955,<br>174.98250000000002, 175.01000000000002, 175.03750000000002,<br>175.06500000000003, 175.09250000000003, 175.12000000000003,<br>175.14750000000004, 175.175, 175.20250000000001,<br>175.23000000000002, 175.25750000000002, 175.28500000000003,<br>175.31250000000003, 175.34000000000003, 175.36750000000004,<br>175.395, 175.4225, 175.45000000000002, 175.47750000000002,<br>175.50500000000002, 175.53250000000003, 175.56000000000003,<br>175.58750000000003, 175.615, 175.6425, 175.67000000000002,<br>175.69750000000002, 175.72500000000002, 175.75250000000003,<br>175.78000000000003, 175.80750000000003, 175.83500000000004,<br>175.8625, 175.89000000000001, 175.91750000000002,<br>175.94500000000002, 175.97250000000003, 176.00000000000003,<br>176.02750000000003, 176.05500000000004, 176.0825, 176.11,<br>176.13750000000002, 176.16500000000002, 176.19250000000002,<br>176.22000000000003, 176.24750000000003, 176.27500000000003,<br>176.3025, 176.33, 176.35750000000002, 176.38500000000002,<br>176.41250000000002, 176.44000000000003, 176.46750000000003,<br>176.49500000000003, 176.52250000000004, 176.55, 176.57750000000001,<br>176.60500000000002, 176.63250000000002, 176.66000000000003,<br>176.68750000000003, 176.71500000000003, 176.74250000000004, 176.77,<br>176.7975, 176.82500000000002, 176.85250000000002,<br>176.88000000000002, 176.90750000000003, 176.93500000000003,<br>176.96250000000003, 176.99, 177.0175, 177.04500000000002,<br>177.07250000000002, 177.10000000000002, 177.12750000000003,<br>177.15500000000003, 177.18250000000003, 177.21000000000004,<br>177.2375, 177.26500000000001, 177.29250000000002,<br>177.32000000000002, 177.34750000000003, 177.37500000000003,<br>177.40250000000003, 177.43000000000004, 177.4575, 177.485,<br>177.51250000000002, 177.54000000000002, 177.56750000000002,<br>177.59500000000003, 177.62250000000003, 177.65000000000003,<br>177.67750000000004, 177.705, 177.73250000000002,<br>177.76000000000002, 177.78750000000002, 177.81500000000003,<br>177.84250000000003, 177.87000000000003, 177.89750000000004,<br>177.925, 177.95250000000001, 177.98000000000002,<br>178.00750000000002, 178.03500000000003, 178.06250000000003,<br>178.09000000000003, 178.11750000000004, 178.145, 178.1725,<br>178.20000000000002, 178.22750000000002, 178.25500000000002,<br>178.28250000000003, 178.31000000000003, 178.33750000000003, |

| Description | Value                                                                                                                                                                                                                                                                                                                                                                                                                                                                                                                                                                                                                                                                                                                                                                                                                                                                                                                                                                                                                                                                                                                                                                                                                                                                                                                                                                                                                                                                                                                                                                                                                                                                                                                                                                                                                                                                                                                                                                                                                                                                                                                                                                                                                                                                                                                                                                                                                                                                                                                                                                                                                                                                                                                                                                                                                                                                                                                                                                                                                                                                 |
|-------------|-----------------------------------------------------------------------------------------------------------------------------------------------------------------------------------------------------------------------------------------------------------------------------------------------------------------------------------------------------------------------------------------------------------------------------------------------------------------------------------------------------------------------------------------------------------------------------------------------------------------------------------------------------------------------------------------------------------------------------------------------------------------------------------------------------------------------------------------------------------------------------------------------------------------------------------------------------------------------------------------------------------------------------------------------------------------------------------------------------------------------------------------------------------------------------------------------------------------------------------------------------------------------------------------------------------------------------------------------------------------------------------------------------------------------------------------------------------------------------------------------------------------------------------------------------------------------------------------------------------------------------------------------------------------------------------------------------------------------------------------------------------------------------------------------------------------------------------------------------------------------------------------------------------------------------------------------------------------------------------------------------------------------------------------------------------------------------------------------------------------------------------------------------------------------------------------------------------------------------------------------------------------------------------------------------------------------------------------------------------------------------------------------------------------------------------------------------------------------------------------------------------------------------------------------------------------------------------------------------------------------------------------------------------------------------------------------------------------------------------------------------------------------------------------------------------------------------------------------------------------------------------------------------------------------------------------------------------------------------------------------------------------------------------------------------------------------|
|             | 178.36500000000004, 178.3925, 178.42000000000002,<br>178.44750000000002, 178.47500000000002, 178.50250000000003,<br>178.53000000000003, 178.55750000000003, 178.58500000000004,<br>178.6125, 178.64000000000001, 178.66750000000002,<br>178.69500000000002, 178.72250000000003, 178.75000000000003,<br>178.77750000000003, 178.80500000000004, 178.8325, 178.86,<br>178.88750000000002, 178.91500000000002, 178.94250000000002,<br>178.97000000000003, 178.99750000000003, 179.02500000000003,<br>179.05250000000004, 179.08, 179.10750000000002, 179.13500000000002,<br>179.16250000000002, 179.19000000000003, 179.21750000000003,<br>179.24500000000003, 179.27250000000004, 179.3, 179.32750000000001,<br>179.35500000000002, 179.38250000000002, 179.41000000000003,<br>179.43750000000003, 179.46500000000003, 179.49250000000004, 179.52,<br>179.5475, 179.57500000000002, 179.60250000000002,<br>179.63000000000002, 179.65750000000003, 179.68500000000003,<br>179.71250000000003, 179.74000000000004, 179.7675,<br>179.79500000000002, 179.82250000000002, 179.85000000000002,<br>179.87750000000003, 179.90500000000003, 179.93250000000003,<br>179.96000000000004, 179.9875, 180.01500000000001,<br>180.04250000000002, 180.07000000000002, 180.09750000000003,<br>180.12500000000003, 180.15250000000003, 180.18000000000004,<br>180.2075, 180.235, 180.26250000000002, 180.29000000000002,<br>180.31750000000002, 180.34500000000003, 180.37250000000003,<br>180.40000000000003, 180.42750000000004, 180.455,<br>180.48250000000002, 180.51000000000002, 180.53750000000002,<br>180.56500000000003, 180.59250000000003, 180.62000000000003,<br>180.64750000000004, 180.675, 180.70250000000001,<br>180.73000000000002, 180.75750000000002, 180.78500000000003,<br>180.81250000000003, 180.84000000000003, 180.86750000000004,<br>180.895, 180.9225, 180.95000000000002, 180.97750000000002,<br>181.00500000000002, 181.03250000000003, 181.06000000000003,<br>181.08750000000003, 181.11500000000004, 181.1425,<br>181.17000000000002, 181.19750000000002, 181.22500000000002,<br>181.25250000000003, 181.28000000000003, 181.30750000000003,<br>181.33500000000004, 181.3625, 181.39000000000001,<br>181.41750000000002, 181.44500000000002, 181.47250000000003,<br>181.50000000000003, 181.52750000000003, 181.55500000000004,<br>181.5825, 181.61, 181.63750000000002, 181.66500000000002,<br>181.69250000000002, 181.72000000000003, 181.74750000000003,<br>181.77500000000003, 181.80250000000004, 181.83, 181.85750000000002,<br>181.88500000000002, 181.91250000000002, 181.94000000000003,<br>181.96750000000003, 181.99500000000003, 182.02250000000004, 182.05,<br>182.07750000000001, 182.10500000000002, 182.13250000000002,<br>182.16000000000003, 182.18750000000003, 182.21500000000003,<br>182.24250000000004, 182.27, 182.2975, 182.32500000000002,<br>182.35250000000002, 182.38000000000002, 182.40750000000003,<br>182.43500000000003, 182.46250000000003, 182.49000000000004,<br>182.5175, 182.54500000000002, 182.57250000000002, |

| Description | Value                                                                                                                                                                                                                                                                                                                                                                                                                                                                                                                                                                                                                                                                                                                                                                                                                                                                                                                                                                                                                                                                                                                                                                                                                                                                                                                                                                                                                                                                                                                                                                                                                                                                                                                                                                                                                                                                                                                                                                                                                                                                                                                                                                                                                                                                                                                                                                                                                                                                                                                                                                                                                                                                                                                                                                                                                                                                                                                                                                                                                              |
|-------------|------------------------------------------------------------------------------------------------------------------------------------------------------------------------------------------------------------------------------------------------------------------------------------------------------------------------------------------------------------------------------------------------------------------------------------------------------------------------------------------------------------------------------------------------------------------------------------------------------------------------------------------------------------------------------------------------------------------------------------------------------------------------------------------------------------------------------------------------------------------------------------------------------------------------------------------------------------------------------------------------------------------------------------------------------------------------------------------------------------------------------------------------------------------------------------------------------------------------------------------------------------------------------------------------------------------------------------------------------------------------------------------------------------------------------------------------------------------------------------------------------------------------------------------------------------------------------------------------------------------------------------------------------------------------------------------------------------------------------------------------------------------------------------------------------------------------------------------------------------------------------------------------------------------------------------------------------------------------------------------------------------------------------------------------------------------------------------------------------------------------------------------------------------------------------------------------------------------------------------------------------------------------------------------------------------------------------------------------------------------------------------------------------------------------------------------------------------------------------------------------------------------------------------------------------------------------------------------------------------------------------------------------------------------------------------------------------------------------------------------------------------------------------------------------------------------------------------------------------------------------------------------------------------------------------------------------------------------------------------------------------------------------------------|
|             | 182.60000000000002, 182.62750000000003, 182.65500000000003,<br>182.68250000000003, 182.71000000000004, 182.7375,<br>182.76500000000001, 182.79250000000002, 182.82000000000002,<br>182.84750000000003, 182.87500000000003, 182.90250000000003,<br>182.93000000000004, 182.9575, 182.985, 183.01250000000002,<br>183.04000000000002, 183.06750000000002, 183.09500000000003,<br>183.12250000000003, 183.15000000000003, 183.17750000000004,<br>183.205, 183.23250000000002, 183.26000000000002,<br>183.28750000000002, 183.31500000000003, 183.34250000000003,<br>183.37000000000003, 183.39750000000004, 183.425,<br>183.45250000000001, 183.48000000000002, 183.50750000000002,<br>183.53500000000003, 183.56250000000003, 183.59000000000003,<br>183.61750000000004, 183.645, 183.6725, 183.70000000000002,<br>183.72750000000002, 183.75500000000002, 183.78250000000003,<br>183.81000000000003, 183.83750000000003, 183.86500000000004,<br>183.8925, 183.92000000000002, 183.94750000000002,<br>183.97500000000002, 184.00250000000003, 184.03000000000003,<br>184.05750000000003, 184.08500000000004, 184.1125,<br>184.14000000000001, 184.16750000000002, 184.19500000000002,<br>184.22250000000003, 184.25000000000003, 184.27750000000003,<br>184.30500000000004, 184.3325, 184.36, 184.38750000000002,<br>184.41500000000002, 184.44250000000002, 184.47000000000003,<br>184.49750000000003, 184.52500000000003, 184.55250000000004, 184.58,<br>184.60750000000002, 184.63500000000002, 184.66250000000002,<br>184.69000000000003, 184.71750000000003, 184.74500000000003,<br>184.77250000000004, 184.8, 184.82750000000001, 184.85500000000002,<br>184.88250000000002, 184.91000000000003, 184.93750000000003,<br>184.96500000000003, 184.99250000000004, 185.02, 185.0475,<br>185.07500000000002, 185.10250000000002, 185.13000000000002,<br>185.15750000000003, 185.18500000000003, 185.21250000000003,<br>185.24000000000004, 185.2675, 185.29500000000002,<br>185.32250000000002, 185.35000000000002, 185.37750000000003,<br>185.40500000000003, 185.43250000000003, 185.46000000000004,<br>185.4875, 185.51500000000001, 185.54250000000002,<br>185.57000000000002, 185.59750000000003, 185.62500000000003,<br>185.65250000000003, 185.68000000000004, 185.7075, 185.735,<br>185.76250000000002, 185.79000000000002, 185.81750000000002,<br>185.84500000000003, 185.87250000000003, 185.90000000000003,<br>185.92750000000004, 185.955, 185.98250000000002,<br>186.01000000000002, 186.03750000000002, 186.06500000000003,<br>186.09250000000003, 186.12000000000003, 186.14750000000004,<br>186.175, 186.20250000000001, 186.23000000000002,<br>186.25750000000002, 186.28500000000003, 186.31250000000003,<br>186.34000000000003, 186.36750000000004, 186.39500000000004,<br>186.4225, 186.45000000000002, 186.47750000000002,<br>186.50500000000002, 186.53250000000003, 186.56000000000003,<br>186.58750000000003, 186.61500000000004, 186.6425,<br>186.67000000000002, 186.69750000000002, 186.72500000000002, |

| Description | Value                                                                                                                                                                                                                                                                                                                                                                                                                                                                                                                                                                                                                                                                                                                                                                                                                                                                                                                                                                                                                                                                                                                                                                                                                                                                                                                                                                                                                                                                                                                                                                                                                                                                                                                                                                                                                                                                                                                                                                                                                                                                                                                                                                                                                                                                                                                                                                                                                                                                                                                                                                                                                                                                                                                                                                                                                                                                                                                                                                                                                                                            |
|-------------|------------------------------------------------------------------------------------------------------------------------------------------------------------------------------------------------------------------------------------------------------------------------------------------------------------------------------------------------------------------------------------------------------------------------------------------------------------------------------------------------------------------------------------------------------------------------------------------------------------------------------------------------------------------------------------------------------------------------------------------------------------------------------------------------------------------------------------------------------------------------------------------------------------------------------------------------------------------------------------------------------------------------------------------------------------------------------------------------------------------------------------------------------------------------------------------------------------------------------------------------------------------------------------------------------------------------------------------------------------------------------------------------------------------------------------------------------------------------------------------------------------------------------------------------------------------------------------------------------------------------------------------------------------------------------------------------------------------------------------------------------------------------------------------------------------------------------------------------------------------------------------------------------------------------------------------------------------------------------------------------------------------------------------------------------------------------------------------------------------------------------------------------------------------------------------------------------------------------------------------------------------------------------------------------------------------------------------------------------------------------------------------------------------------------------------------------------------------------------------------------------------------------------------------------------------------------------------------------------------------------------------------------------------------------------------------------------------------------------------------------------------------------------------------------------------------------------------------------------------------------------------------------------------------------------------------------------------------------------------------------------------------------------------------------------------------|
|             | 186.75250000000003, 186.78000000000003, 186.80750000000003,<br>186.83500000000004, 186.8625, 186.89000000000001,<br>186.91750000000002, 186.94500000000002, 186.97250000000003,<br>187.00000000000003, 187.02750000000003, 187.05500000000004,<br>187.08250000000004, 187.11, 187.13750000000002, 187.16500000000002,<br>187.19250000000002, 187.22000000000003, 187.24750000000003,<br>187.27500000000003, 187.30250000000004, 187.33, 187.35750000000002,<br>187.38500000000002, 187.41250000000002, 187.44000000000003,<br>187.46750000000003, 187.49500000000003, 187.52250000000004, 187.55,<br>187.57750000000001, 187.60500000000002, 187.63250000000002,<br>187.66000000000003, 187.68750000000003, 187.71500000000003,<br>187.74250000000004, 187.77000000000004, 187.7975,<br>187.82500000000002, 187.85250000000002, 187.88000000000002,<br>187.90750000000003, 187.93500000000003, 187.96250000000003,<br>187.99000000000004, 188.0175, 188.04500000000002,<br>188.07250000000002, 188.10000000000002, 188.12750000000003,<br>188.15500000000003, 188.18250000000003, 188.21000000000004,<br>188.2375, 188.26500000000001, 188.29250000000002,<br>188.32000000000002, 188.34750000000003, 188.37500000000003,<br>188.40250000000003, 188.43000000000004, 188.45750000000004,<br>188.485, 188.51250000000002, 188.54000000000002,<br>188.56750000000002, 188.59500000000003, 188.62250000000003,<br>188.65000000000003, 188.67750000000004, 188.705,<br>188.73250000000002, 188.76000000000002, 188.78750000000002,<br>188.81500000000003, 188.84250000000003, 188.87000000000003,<br>188.89750000000004, 188.925, 188.95250000000001,<br>188.98000000000002, 189.00750000000002, 189.03500000000003,<br>189.06250000000003, 189.09000000000003, 189.11750000000004,<br>189.14500000000004, 189.1725, 189.20000000000002,<br>189.22750000000002, 189.25500000000002, 189.28250000000003,<br>189.31000000000003, 189.33750000000003, 189.36500000000004,<br>189.3925, 189.42000000000002, 189.44750000000002,<br>189.47500000000002, 189.50250000000003, 189.53000000000003,<br>189.55750000000003, 189.58500000000004, 189.6125,<br>189.64000000000001, 189.66750000000002, 189.69500000000002,<br>189.72250000000003, 189.75000000000003, 189.77750000000003,<br>189.80500000000004, 189.83250000000004, 189.86, 189.88750000000002,<br>189.91500000000002, 189.94250000000002, 189.97000000000003,<br>189.99750000000003, 190.02500000000003, 190.05250000000004, 190.08,<br>190.10750000000002, 190.13500000000002, 190.16250000000002,<br>190.19000000000003, 190.21750000000003, 190.24500000000003,<br>190.27250000000004, 190.3, 190.32750000000001, 190.35500000000002,<br>190.38250000000002, 190.41000000000003, 190.43750000000003,<br>190.46500000000003, 190.49250000000004, 190.52000000000004,<br>190.5475, 190.57500000000002, 190.60250000000002,<br>190.63000000000002, 190.65750000000003, 190.68500000000003,<br>190.71250000000003, 190.74000000000004, 190.7675,<br>190.79500000000002, 190.82250000000002, 190.85000000000002, |

| Description | Value                                                                                                                                                                                                                                                                                                                                                                                                                                                                                                                                                                                                                                                                                                                                                                                                                                                                                                                                                                                                                                                                                                                                                                                                                                                                                                                                                                                                                                                                                                                                                                                                                                                                                                                                                                                                                                                                                                                                                                                                                                                                                                                                                                                                                                                                                                                                                                                                                                                                                                                                                                                                                                                                                                                                                                                                                                                                                                                                                                                                    |
|-------------|----------------------------------------------------------------------------------------------------------------------------------------------------------------------------------------------------------------------------------------------------------------------------------------------------------------------------------------------------------------------------------------------------------------------------------------------------------------------------------------------------------------------------------------------------------------------------------------------------------------------------------------------------------------------------------------------------------------------------------------------------------------------------------------------------------------------------------------------------------------------------------------------------------------------------------------------------------------------------------------------------------------------------------------------------------------------------------------------------------------------------------------------------------------------------------------------------------------------------------------------------------------------------------------------------------------------------------------------------------------------------------------------------------------------------------------------------------------------------------------------------------------------------------------------------------------------------------------------------------------------------------------------------------------------------------------------------------------------------------------------------------------------------------------------------------------------------------------------------------------------------------------------------------------------------------------------------------------------------------------------------------------------------------------------------------------------------------------------------------------------------------------------------------------------------------------------------------------------------------------------------------------------------------------------------------------------------------------------------------------------------------------------------------------------------------------------------------------------------------------------------------------------------------------------------------------------------------------------------------------------------------------------------------------------------------------------------------------------------------------------------------------------------------------------------------------------------------------------------------------------------------------------------------------------------------------------------------------------------------------------------------|
|             | 190.87750000000003, 190.90500000000003, 190.93250000000003,<br>190.96000000000004, 190.9875, 191.01500000000001,<br>191.04250000000002, 191.07000000000002, 191.09750000000003,<br>191.12500000000003, 191.15250000000003, 191.18000000000004,<br>191.20750000000004, 191.235, 191.26250000000002,<br>191.29000000000002, 191.31750000000002, 191.34500000000003,<br>191.37250000000003, 191.40000000000003, 191.42750000000004,<br>191.455, 191.48250000000002, 191.51000000000002,<br>191.53750000000002, 191.56500000000003, 191.59250000000003,<br>191.62000000000003, 191.64750000000004, 191.675,<br>191.70250000000001, 191.73000000000002, 191.75750000000002,<br>191.78500000000003, 191.81250000000003, 191.84000000000003,<br>191.86750000000004, 191.89500000000004, 191.9225,<br>191.95000000000002, 191.97750000000002, 192.00500000000002,<br>192.03250000000003, 192.06000000000003, 192.08750000000003,<br>192.11500000000004, 192.1425, 192.17000000000002,<br>192.19750000000002, 192.22500000000002, 192.25250000000003,<br>192.28000000000003, 192.30750000000003, 192.33500000000004,<br>192.3625, 192.39000000000001, 192.41750000000002,<br>192.44500000000002, 192.47250000000003, 192.50000000000003,<br>192.52750000000003, 192.55500000000004, 192.58250000000004, 192.61,<br>192.63750000000002, 192.66500000000002, 192.69250000000002,<br>192.72000000000003, 192.74750000000003, 192.77500000000003,<br>192.80250000000004, 192.83, 192.85750000000002, 192.88500000000002,<br>192.91250000000002, 192.94000000000003, 192.96750000000003,<br>192.99500000000003, 193.02250000000004, 193.05, 193.07750000000001,<br>193.10500000000002, 193.13250000000002, 193.16000000000003,<br>193.18750000000003, 193.21500000000003, 193.24250000000004,<br>193.27000000000004, 193.2975, 193.32500000000002,<br>193.35250000000002, 193.38000000000002, 193.40750000000003,<br>193.43500000000003, 193.46250000000003, 193.49000000000004,<br>193.5175, 193.54500000000002, 193.57250000000002,<br>193.60000000000002, 193.62750000000003, 193.65500000000003,<br>193.68250000000003, 193.71000000000004, 193.7375,<br>193.76500000000001, 193.79250000000002, 193.82000000000002,<br>193.84750000000003, 193.87500000000003, 193.90250000000003,<br>193.93000000000004, 193.95750000000004, 193.985,<br>194.01250000000002, 194.04000000000002, 194.06750000000002,<br>194.09500000000003, 194.12250000000003, 194.15000000000003,<br>194.17750000000004, 194.205, 194.23250000000002,<br>194.26000000000002, 194.28750000000002, 194.31500000000003,<br>194.34250000000003, 194.37000000000003, 194.39750000000004,<br>194.425, 194.45250000000001, 194.48000000000002,<br>194.50750000000002, 194.53500000000003, 194.56250000000003,<br>194.59000000000003, 194.61750000000004, 194.64500000000004,<br>194.6725, 194.70000000000002, 194.72750000000002,<br>194.75500000000002, 194.78250000000003, 194.81000000000003,<br>194.83750000000003, 194.86500000000004, 194.8925, |

| Description | Value                                                                                                                                                                                                                                                                                                                                                                                                                                                                                                                                                                                                                                                                                                                                                                                                                                                                                                                                                                                                                                                                                                                                                                                                                                                                                                                                                                                                                                                                                                                                                                                                                                                                                                                                                                                                                                                                                                                                                                                                                                                                                                                                                                                                                                                                                                                                                                                                                                                                                                                                                                                                                                                                                                                                                                                                                                                                                                                                                                                                                                                                                                |
|-------------|------------------------------------------------------------------------------------------------------------------------------------------------------------------------------------------------------------------------------------------------------------------------------------------------------------------------------------------------------------------------------------------------------------------------------------------------------------------------------------------------------------------------------------------------------------------------------------------------------------------------------------------------------------------------------------------------------------------------------------------------------------------------------------------------------------------------------------------------------------------------------------------------------------------------------------------------------------------------------------------------------------------------------------------------------------------------------------------------------------------------------------------------------------------------------------------------------------------------------------------------------------------------------------------------------------------------------------------------------------------------------------------------------------------------------------------------------------------------------------------------------------------------------------------------------------------------------------------------------------------------------------------------------------------------------------------------------------------------------------------------------------------------------------------------------------------------------------------------------------------------------------------------------------------------------------------------------------------------------------------------------------------------------------------------------------------------------------------------------------------------------------------------------------------------------------------------------------------------------------------------------------------------------------------------------------------------------------------------------------------------------------------------------------------------------------------------------------------------------------------------------------------------------------------------------------------------------------------------------------------------------------------------------------------------------------------------------------------------------------------------------------------------------------------------------------------------------------------------------------------------------------------------------------------------------------------------------------------------------------------------------------------------------------------------------------------------------------------------------|
|             | 194.92000000000002, 194.94750000000002, 194.97500000000002,<br>195.00250000000003, 195.03000000000003, 195.05750000000003,<br>195.08500000000004, 195.11250000000004, 195.14000000000001,<br>195.16750000000002, 195.19500000000002, 195.22250000000003,<br>195.25000000000003, 195.27750000000003, 195.30500000000004,<br>195.33250000000004, 195.36, 195.38750000000002, 195.41500000000002,<br>195.44250000000002, 195.47000000000003, 195.49750000000003,<br>195.52500000000003, 195.55250000000004, 195.58, 195.60750000000002,<br>195.63500000000002, 195.66250000000002, 195.69000000000003,<br>195.71750000000003, 195.74500000000003, 195.77250000000004,<br>195.80000000000004, 195.82750000000001, 195.85500000000002,<br>195.88250000000002, 195.91000000000003, 195.93750000000003,<br>195.96500000000003, 195.99250000000004, 196.02000000000004,<br>196.0475, 196.07500000000002, 196.10250000000002,<br>196.13000000000002, 196.15750000000003, 196.18500000000003,<br>196.21250000000003, 196.24000000000004, 196.2675,<br>196.29500000000002, 196.32250000000002, 196.35000000000002,<br>196.37750000000003, 196.40500000000003, 196.43250000000003,<br>196.46000000000004, 196.48750000000004, 196.51500000000001,<br>196.54250000000002, 196.57000000000002, 196.59750000000003,<br>196.62500000000003, 196.65250000000003, 196.68000000000004,<br>196.70750000000004, 196.735, 196.76250000000002,<br>196.79000000000002, 196.81750000000002, 196.84500000000003,<br>196.87250000000003, 196.90000000000003, 196.92750000000004,<br>196.955, 196.98250000000002, 197.01000000000002,<br>197.03750000000002, 197.06500000000003, 197.09250000000003,<br>197.12000000000003, 197.14750000000004, 197.17500000000004,<br>197.20250000000001, 197.23000000000002, 197.25750000000002,<br>197.28500000000003, 197.31250000000003, 197.34000000000003,<br>197.36750000000004, 197.39500000000004, 197.4225,<br>197.45000000000002, 197.47750000000002, 197.50500000000002,<br>197.53250000000003, 197.56000000000003, 197.58750000000003,<br>197.61500000000004, 197.6425, 197.67000000000002,<br>197.69750000000002, 197.72500000000002, 197.75250000000003,<br>197.78000000000003, 197.80750000000003, 197.83500000000004,<br>197.86250000000004, 197.89000000000001, 197.91750000000002,<br>197.94500000000002, 197.97250000000003, 198.00000000000003,<br>198.02750000000003, 198.05500000000004, 198.08250000000004, 198.11,<br>198.13750000000002, 198.16500000000002, 198.19250000000002,<br>198.22000000000003, 198.24750000000003, 198.27500000000003,<br>198.30250000000004, 198.33, 198.35750000000002, 198.38500000000002,<br>198.41250000000002, 198.44000000000003, 198.46750000000003,<br>198.49500000000003, 198.52250000000004, 198.55000000000004,<br>198.57750000000001, 198.60500000000002, 198.63250000000002,<br>198.66000000000003, 198.68750000000003, 198.71500000000003,<br>198.74250000000004, 198.77000000000004, 198.7975,<br>198.82500000000002, 198.85250000000002, 198.88000000000002,<br>198.90750000000003, 198.93500000000003, 198.96250000000003, |

| Description | Value                                                                                                                                                                                                                                                                                                                                                                                                                                                                                                                                                                                                                                                                                                                                                                                                                                                                                                                                                                                                                                                                                                                                                                                                                                                                                                                                                                                                                                                                                                                                                                                                                                                                                                                                                                                                                                                                                                                                                                                                                                                                                                                                                                                                                                                                                                                                                                                                                                                                                                                                                                                                                                                                                                                                                                                                                                                                                                                                                                                                                                                |
|-------------|------------------------------------------------------------------------------------------------------------------------------------------------------------------------------------------------------------------------------------------------------------------------------------------------------------------------------------------------------------------------------------------------------------------------------------------------------------------------------------------------------------------------------------------------------------------------------------------------------------------------------------------------------------------------------------------------------------------------------------------------------------------------------------------------------------------------------------------------------------------------------------------------------------------------------------------------------------------------------------------------------------------------------------------------------------------------------------------------------------------------------------------------------------------------------------------------------------------------------------------------------------------------------------------------------------------------------------------------------------------------------------------------------------------------------------------------------------------------------------------------------------------------------------------------------------------------------------------------------------------------------------------------------------------------------------------------------------------------------------------------------------------------------------------------------------------------------------------------------------------------------------------------------------------------------------------------------------------------------------------------------------------------------------------------------------------------------------------------------------------------------------------------------------------------------------------------------------------------------------------------------------------------------------------------------------------------------------------------------------------------------------------------------------------------------------------------------------------------------------------------------------------------------------------------------------------------------------------------------------------------------------------------------------------------------------------------------------------------------------------------------------------------------------------------------------------------------------------------------------------------------------------------------------------------------------------------------------------------------------------------------------------------------------------------------|
|             | 198.99000000000004, 199.0175, 199.04500000000002,<br>199.07250000000002, 199.10000000000002, 199.12750000000003,<br>199.15500000000003, 199.18250000000003, 199.21000000000004,<br>199.23750000000004, 199.26500000000001, 199.29250000000002,<br>199.32000000000002, 199.34750000000003, 199.37500000000003,<br>199.40250000000003, 199.43000000000004, 199.45750000000004,<br>199.485, 199.51250000000002, 199.54000000000002,<br>199.56750000000002, 199.59500000000003, 199.62250000000003,<br>199.65000000000003, 199.67750000000004, 199.705,<br>199.73250000000002, 199.76000000000002, 199.78750000000002,<br>199.81500000000003, 199.84250000000003, 199.87000000000003,<br>199.89750000000004, 199.92500000000004, 199.95250000000001,<br>199.98000000000002, 200.00750000000002, 200.03500000000003,<br>200.06250000000003, 200.09000000000003, 200.11750000000004,<br>200.14500000000004, 200.1725, 200.20000000000002,<br>200.22750000000002, 200.25500000000002, 200.28250000000003,<br>200.31000000000003, 200.33750000000003, 200.36500000000004,<br>200.3925, 200.42000000000002, 200.44750000000002,<br>200.47500000000002, 200.50250000000003, 200.53000000000003,<br>200.55750000000003, 200.58500000000004, 200.61250000000004,<br>200.64000000000001, 200.66750000000002, 200.69500000000002,<br>200.72250000000003, 200.75000000000003, 200.77750000000003,<br>200.80500000000004, 200.83250000000004, 200.86, 200.88750000000002,<br>200.91500000000002, 200.94250000000002, 200.97000000000003,<br>200.99750000000003, 201.02500000000003, 201.05250000000004, 201.08,<br>201.10750000000002, 201.13500000000002, 201.16250000000002,<br>201.19000000000003, 201.21750000000003, 201.24500000000003,<br>201.27250000000004, 201.30000000000004, 201.32750000000001,<br>201.35500000000002, 201.38250000000002, 201.41000000000003,<br>201.43750000000003, 201.46500000000003, 201.49250000000004,<br>201.52000000000004, 201.5475, 201.57500000000002,<br>201.60250000000002, 201.63000000000002, 201.65750000000003,<br>201.68500000000003, 201.71250000000003, 201.74000000000004,<br>201.7675, 201.79500000000002, 201.82250000000002,<br>201.85000000000002, 201.87750000000003, 201.90500000000003,<br>201.93250000000003, 201.96000000000004, 201.98750000000004,<br>202.01500000000001, 202.04250000000002, 202.07000000000002,<br>202.09750000000003, 202.12500000000003, 202.15250000000003,<br>202.18000000000004, 202.20750000000004, 202.235,<br>202.26250000000002, 202.29000000000002, 202.31750000000002,<br>202.34500000000003, 202.37250000000003, 202.40000000000003,<br>202.42750000000004, 202.455, 202.48250000000002,<br>202.51000000000002, 202.53750000000002, 202.56500000000003,<br>202.59250000000003, 202.62000000000003, 202.64750000000004,<br>202.67500000000004, 202.70250000000001, 202.73000000000002,<br>202.75750000000002, 202.78500000000003, 202.81250000000003,<br>202.84000000000003, 202.86750000000004, 202.89500000000004,<br>202.9225, 202.95000000000002, 202.97750000000002, |



| Description | Value                                                                                                                                                                                                                                                                                                                                                                                                                                                                                                                                                                                                                                                                                                                                                                                                                                                                                                                                                                                                                                                                                                                                                                                                                                                                                                                                                                                                                                                                                                                                                                                                                                                                                                                                                                                                                                                                                                                                                                                                                                                                                                                                                                                                                                                                                                                                                                                                                                                                                                                                                                                                                                                                                                                                                                                                                                                                                                                                                                                                                                                                                                               |
|-------------|---------------------------------------------------------------------------------------------------------------------------------------------------------------------------------------------------------------------------------------------------------------------------------------------------------------------------------------------------------------------------------------------------------------------------------------------------------------------------------------------------------------------------------------------------------------------------------------------------------------------------------------------------------------------------------------------------------------------------------------------------------------------------------------------------------------------------------------------------------------------------------------------------------------------------------------------------------------------------------------------------------------------------------------------------------------------------------------------------------------------------------------------------------------------------------------------------------------------------------------------------------------------------------------------------------------------------------------------------------------------------------------------------------------------------------------------------------------------------------------------------------------------------------------------------------------------------------------------------------------------------------------------------------------------------------------------------------------------------------------------------------------------------------------------------------------------------------------------------------------------------------------------------------------------------------------------------------------------------------------------------------------------------------------------------------------------------------------------------------------------------------------------------------------------------------------------------------------------------------------------------------------------------------------------------------------------------------------------------------------------------------------------------------------------------------------------------------------------------------------------------------------------------------------------------------------------------------------------------------------------------------------------------------------------------------------------------------------------------------------------------------------------------------------------------------------------------------------------------------------------------------------------------------------------------------------------------------------------------------------------------------------------------------------------------------------------------------------------------------------------|
|             | 203.00500000000002, 203.03250000000003, 203.06000000000003,<br>203.08750000000003, 203.11500000000004, 203.1425,<br>203.17000000000002, 203.19750000000002, 203.22500000000002,<br>203.25250000000003, 203.28000000000003, 203.30750000000003,<br>203.33500000000004, 203.36250000000004, 203.39000000000001,<br>203.41750000000002, 203.44500000000002, 203.47250000000003,<br>203.50000000000003, 203.52750000000003, 203.55500000000004,<br>203.58250000000004, 203.61, 203.63750000000002, 203.66500000000002,<br>203.69250000000002, 203.72000000000003, 203.74750000000003,<br>203.77500000000003, 203.80250000000004, 203.83000000000004,<br>203.85750000000002, 203.88500000000002, 203.91250000000002,<br>203.94000000000003, 203.96750000000003, 203.99500000000003,<br>204.02250000000004, 204.05000000000004, 204.07750000000001,<br>204.10500000000002, 204.13250000000002, 204.16000000000003,<br>204.18750000000003, 204.21500000000003, 204.24250000000004,<br>204.27000000000004, 204.2975, 204.32500000000002,<br>204.35250000000002, 204.38000000000002, 204.40750000000003,<br>204.43500000000003, 204.46250000000003, 204.49000000000004,<br>204.51750000000004, 204.54500000000002, 204.57250000000002,<br>204.60000000000002, 204.62750000000003, 204.65500000000003,<br>204.68250000000003, 204.71000000000004, 204.73750000000004,<br>204.76500000000001, 204.79250000000002, 204.82000000000002,<br>204.84750000000003, 204.87500000000003, 204.90250000000003,<br>204.93000000000004, 204.95750000000004, 204.985,<br>205.01250000000002, 205.04000000000002, 205.06750000000002,<br>205.09500000000003, 205.12250000000003, 205.15000000000003,<br>205.17750000000004, 205.20500000000004, 205.23250000000002,<br>205.26000000000002, 205.28750000000002, 205.31500000000003,<br>205.34250000000003, 205.37000000000003, 205.39750000000004,<br>205.42500000000004, 205.45250000000001, 205.48000000000002,<br>205.50750000000002, 205.53500000000003, 205.56250000000003,<br>205.59000000000003, 205.61750000000004, 205.64500000000004,<br>205.6725, 205.70000000000002, 205.72750000000002,<br>205.75500000000002, 205.78250000000003, 205.81000000000003,<br>205.83750000000003, 205.86500000000004, 205.89250000000004,<br>205.92000000000002, 205.94750000000002, 205.97500000000002,<br>206.00250000000003, 206.03000000000003, 206.05750000000003,<br>206.08500000000004, 206.11250000000004, 206.14000000000001,<br>206.16750000000002, 206.19500000000002, 206.22250000000003,<br>206.25000000000003, 206.27750000000003, 206.30500000000004,<br>206.33250000000004, 206.36, 206.38750000000002, 206.41500000000002,<br>206.44250000000002, 206.47000000000003, 206.49750000000003,<br>206.52500000000003, 206.55250000000004, 206.58000000000004,<br>206.60750000000002, 206.63500000000002, 206.66250000000002,<br>206.69000000000003, 206.71750000000003, 206.74500000000003,<br>206.77250000000004, 206.80000000000004, 206.82750000000001,<br>206.85500000000002, 206.88250000000002, 206.91000000000003,<br>206.93750000000003, 206.96500000000003, 206.99250000000004, |

| Description | Value                                                                                                                                                                                                                                                                                                                                                                                                                                                                                                                                                                                                                                                                                                                                                                                                                                                                                                                                                                                                                                                                                                                                                                                                                                                                                                                                                                                                                                                                                                                                                                                                                                                                                                                                                                                                                                                                                                                                                                                                                                                                                                                                                                                                                                                                                                                                                                                                                                                                                                                                                                                                                                                                                                                                                                                                                                                                                                                                                                                                                                                                                            |
|-------------|--------------------------------------------------------------------------------------------------------------------------------------------------------------------------------------------------------------------------------------------------------------------------------------------------------------------------------------------------------------------------------------------------------------------------------------------------------------------------------------------------------------------------------------------------------------------------------------------------------------------------------------------------------------------------------------------------------------------------------------------------------------------------------------------------------------------------------------------------------------------------------------------------------------------------------------------------------------------------------------------------------------------------------------------------------------------------------------------------------------------------------------------------------------------------------------------------------------------------------------------------------------------------------------------------------------------------------------------------------------------------------------------------------------------------------------------------------------------------------------------------------------------------------------------------------------------------------------------------------------------------------------------------------------------------------------------------------------------------------------------------------------------------------------------------------------------------------------------------------------------------------------------------------------------------------------------------------------------------------------------------------------------------------------------------------------------------------------------------------------------------------------------------------------------------------------------------------------------------------------------------------------------------------------------------------------------------------------------------------------------------------------------------------------------------------------------------------------------------------------------------------------------------------------------------------------------------------------------------------------------------------------------------------------------------------------------------------------------------------------------------------------------------------------------------------------------------------------------------------------------------------------------------------------------------------------------------------------------------------------------------------------------------------------------------------------------------------------------------|
|             | 207.02000000000004, 207.0475, 207.07500000000002,<br>207.10250000000002, 207.13000000000002, 207.15750000000003,<br>207.18500000000003, 207.21250000000003, 207.24000000000004,<br>207.26750000000004, 207.29500000000002, 207.32250000000002,<br>207.35000000000002, 207.37750000000003, 207.40500000000003,<br>207.43250000000003, 207.46000000000004, 207.48750000000004,<br>207.51500000000001, 207.54250000000002, 207.57000000000002,<br>207.59750000000003, 207.62500000000003, 207.65250000000003,<br>207.68000000000004, 207.70750000000004, 207.735,<br>207.76250000000002, 207.79000000000002, 207.81750000000002,<br>207.84500000000003, 207.87250000000003, 207.90000000000003,<br>207.92750000000004, 207.95500000000004, 207.98250000000002,<br>208.01000000000002, 208.03750000000002, 208.06500000000003,<br>208.09250000000003, 208.12000000000003, 208.14750000000004,<br>208.17500000000004, 208.20250000000001, 208.23000000000002,<br>208.25750000000002, 208.28500000000003, 208.31250000000003,<br>208.34000000000003, 208.36750000000004, 208.39500000000004,<br>208.4225, 208.45000000000002, 208.47750000000002,<br>208.50500000000002, 208.53250000000003, 208.56000000000003,<br>208.58750000000003, 208.61500000000004, 208.64250000000004,<br>208.67000000000002, 208.69750000000002, 208.72500000000002,<br>208.75250000000003, 208.78000000000003, 208.80750000000003,<br>208.83500000000004, 208.86250000000004, 208.89000000000001,<br>208.91750000000002, 208.94500000000002, 208.97250000000003,<br>209.00000000000003, 209.02750000000003, 209.05500000000004,<br>209.08250000000004, 209.11, 209.13750000000002, 209.16500000000002,<br>209.19250000000002, 209.22000000000003, 209.24750000000003,<br>209.27500000000003, 209.30250000000004, 209.33000000000004,<br>209.35750000000002, 209.38500000000002, 209.41250000000002,<br>209.44000000000003, 209.46750000000003, 209.49500000000003,<br>209.52250000000004, 209.55000000000004, 209.57750000000001,<br>209.60500000000002, 209.63250000000002, 209.66000000000003,<br>209.68750000000003, 209.71500000000003, 209.74250000000004,<br>209.77000000000004, 209.7975, 209.82500000000002,<br>209.85250000000002, 209.88000000000002, 209.90750000000003,<br>209.93500000000003, 209.96250000000003, 209.99000000000004,<br>210.01750000000004, 210.04500000000002, 210.07250000000002,<br>210.10000000000002, 210.12750000000003, 210.15500000000003,<br>210.18250000000003, 210.21000000000004, 210.23750000000004,<br>210.26500000000001, 210.29250000000002, 210.32000000000002,<br>210.34750000000003, 210.37500000000003, 210.40250000000003,<br>210.43000000000004, 210.45750000000004, 210.485,<br>210.51250000000002, 210.54000000000002, 210.56750000000002,<br>210.59500000000003, 210.62250000000003, 210.65000000000003,<br>210.67750000000004, 210.70500000000004, 210.73250000000002,<br>210.76000000000002, 210.78750000000002, 210.81500000000003,<br>210.84250000000003, 210.87000000000003, 210.89750000000004,<br>210.92500000000004, 210.95250000000001, 210.98000000000002, |

| Description        | Value                                                                                                                                                                                                                                                                                                                                                                                                                                                                                                                                                                                                                                                                                                                                                                                                                                                                                                                                                                                                                                                                                                                                                                                                                                                                                                                                                                                                                                                                                                                                                                                                                                                                                                                                                                                                                                                                                                                                                                                                                                                                                                                                                                                                                                                                                                                                                                                                                                                                                                                                                                                                                                                                                                                                                                   |
|--------------------|-------------------------------------------------------------------------------------------------------------------------------------------------------------------------------------------------------------------------------------------------------------------------------------------------------------------------------------------------------------------------------------------------------------------------------------------------------------------------------------------------------------------------------------------------------------------------------------------------------------------------------------------------------------------------------------------------------------------------------------------------------------------------------------------------------------------------------------------------------------------------------------------------------------------------------------------------------------------------------------------------------------------------------------------------------------------------------------------------------------------------------------------------------------------------------------------------------------------------------------------------------------------------------------------------------------------------------------------------------------------------------------------------------------------------------------------------------------------------------------------------------------------------------------------------------------------------------------------------------------------------------------------------------------------------------------------------------------------------------------------------------------------------------------------------------------------------------------------------------------------------------------------------------------------------------------------------------------------------------------------------------------------------------------------------------------------------------------------------------------------------------------------------------------------------------------------------------------------------------------------------------------------------------------------------------------------------------------------------------------------------------------------------------------------------------------------------------------------------------------------------------------------------------------------------------------------------------------------------------------------------------------------------------------------------------------------------------------------------------------------------------------------------|
|                    | 211.00750000000002, 211.03500000000003, 211.06250000000003,<br>211.09000000000003, 211.11750000000004, 211.14500000000004,<br>211.1725, 211.20000000000002, 211.22750000000002,<br>211.25500000000002, 211.28250000000003, 211.31000000000003,<br>211.33750000000003, 211.36500000000004, 211.39250000000004,<br>211.42000000000002, 211.44750000000002, 211.47500000000002,<br>211.50250000000003, 211.53000000000003, 211.55750000000003,<br>211.58500000000004, 211.61250000000004, 211.64000000000001,<br>211.66750000000002, 211.69500000000002, 211.72250000000003,<br>211.75000000000003, 211.77750000000003, 211.80500000000004,<br>211.83250000000004, 211.86, 211.88750000000002, 211.91500000000002,<br>211.94250000000002, 211.97000000000003, 211.99750000000003,<br>212.02500000000003, 212.05250000000004, 212.08000000000004,<br>212.10750000000002, 212.13500000000002, 212.16250000000002,<br>212.19000000000003, 212.21750000000003, 212.24500000000003,<br>212.27250000000004, 212.30000000000004, 212.32750000000001,<br>212.35500000000002, 212.38250000000002, 212.41000000000003,<br>212.43750000000003, 212.46500000000003, 212.49250000000004,<br>212.52000000000004, 212.54750000000004, 212.57500000000002,<br>212.60250000000002, 212.63000000000002, 212.65750000000003,<br>212.68500000000003, 212.71250000000003, 212.74000000000004,<br>212.76750000000004, 212.79500000000002, 212.82250000000002,<br>212.85000000000002, 212.87750000000003, 212.90500000000003,<br>212.93250000000003, 212.96000000000004, 212.98750000000004,<br>213.01500000000001, 213.04250000000002, 213.07000000000002,<br>213.09750000000003, 213.12500000000003, 213.15250000000003,<br>213.18000000000004, 213.20750000000004, 213.23500000000004,<br>213.26250000000002, 213.29000000000002, 213.31750000000002,<br>213.34500000000003, 213.37250000000003, 213.40000000000003,<br>213.42750000000004, 213.45500000000004, 213.48250000000002,<br>213.51000000000002, 213.53750000000002, 213.56500000000003,<br>213.59250000000003, 213.62000000000003, 213.64750000000004,<br>213.67500000000004, 213.70250000000001, 213.73000000000002,<br>213.75750000000002, 213.78500000000003, 213.81250000000003,<br>213.84000000000003, 213.86750000000004, 213.89500000000004,<br>213.92250000000004, 213.95000000000002, 213.97750000000002,<br>214.00500000000002, 214.03250000000003, 214.06000000000003,<br>214.08750000000003, 214.11500000000004, 214.14250000000004,<br>214.17000000000002, 214.19750000000002, 214.22500000000002,<br>214.25250000000003, 214.28000000000003, 214.30750000000003,<br>214.33500000000004, 214.36250000000004, 214.39000000000001,<br>214.41750000000002, 214.44500000000002, 214.47250000000003,<br>214.50000000000003} |
| Relative tolerance | 0.005                                                                                                                                                                                                                                                                                                                                                                                                                                                                                                                                                                                                                                                                                                                                                                                                                                                                                                                                                                                                                                                                                                                                                                                                                                                                                                                                                                                                                                                                                                                                                                                                                                                                                                                                                                                                                                                                                                                                                                                                                                                                                                                                                                                                                                                                                                                                                                                                                                                                                                                                                                                                                                                                                                                                                                   |

#### TIME STEPPING

| Description | Value |
|-------------|-------|
|-------------|-------|

| <b>Description</b>   | <b>Value</b> |
|----------------------|--------------|
| Maximum BDF order    | 2            |
| Nonlinear controller | On           |

LOG

|      |        |          |    |    |    |   |   |   |         |         |  |
|------|--------|----------|----|----|----|---|---|---|---------|---------|--|
| -    | 202.26 | - out    |    |    |    |   |   |   |         |         |  |
| -    | 202.29 | - out    |    |    |    |   |   |   |         |         |  |
| 2243 | 202.3  | 0.055119 | 34 | 18 | 34 | 2 | 0 | 0 | 2.1e-14 | 5.3e-15 |  |
| -    | 202.32 | - out    |    |    |    |   |   |   |         |         |  |
| -    | 202.35 | - out    |    |    |    |   |   |   |         |         |  |
| 2244 | 202.36 | 0.055119 | 36 | 19 | 36 | 2 | 0 | 0 | 8.1e-14 | 4.3e-15 |  |
| -    | 202.37 | - out    |    |    |    |   |   |   |         |         |  |
| -    | 202.4  | - out    |    |    |    |   |   |   |         |         |  |
| 2245 | 202.41 | 0.055119 | 38 | 20 | 38 | 2 | 0 | 0 | 4.1e-14 | 2.9e-15 |  |
| -    | 202.43 | - out    |    |    |    |   |   |   |         |         |  |
| -    | 202.46 | - out    |    |    |    |   |   |   |         |         |  |
| 2246 | 202.47 | 0.055119 | 40 | 21 | 40 | 2 | 0 | 0 | 2.8e-13 | 4.2e-15 |  |
| -    | 202.48 | - out    |    |    |    |   |   |   |         |         |  |
| -    | 202.51 | - out    |    |    |    |   |   |   |         |         |  |
| 2247 | 202.52 | 0.055119 | 42 | 22 | 42 | 2 | 0 | 0 | 3.8e-14 | 4e-15   |  |
| -    | 202.54 | - out    |    |    |    |   |   |   |         |         |  |
| -    | 202.57 | - out    |    |    |    |   |   |   |         |         |  |
| 2248 | 202.58 | 0.055119 | 44 | 23 | 44 | 2 | 0 | 0 | 2.4e-13 | 4.3e-15 |  |
| -    | 202.59 | - out    |    |    |    |   |   |   |         |         |  |
| -    | 202.62 | - out    |    |    |    |   |   |   |         |         |  |
| 2249 | 202.63 | 0.055119 | 46 | 24 | 46 | 2 | 0 | 0 | 4.6e-13 | 4.6e-15 |  |
| -    | 202.65 | - out    |    |    |    |   |   |   |         |         |  |
| -    | 202.68 | - out    |    |    |    |   |   |   |         |         |  |
| 2250 | 202.69 | 0.055119 | 48 | 25 | 48 | 2 | 0 | 0 | 7.4e-13 | 5.5e-15 |  |
| -    | 202.7  | - out    |    |    |    |   |   |   |         |         |  |
| -    | 202.73 | - out    |    |    |    |   |   |   |         |         |  |
| 2251 | 202.74 | 0.055119 | 50 | 26 | 50 | 2 | 0 | 0 | 4.8e-13 | 3.1e-15 |  |
| -    | 202.76 | - out    |    |    |    |   |   |   |         |         |  |
| -    | 202.79 | - out    |    |    |    |   |   |   |         |         |  |
| 2252 | 202.8  | 0.055119 | 52 | 27 | 52 | 2 | 0 | 0 | 2.1e-13 | 4.1e-15 |  |
| -    | 202.81 | - out    |    |    |    |   |   |   |         |         |  |
| -    | 202.84 | - out    |    |    |    |   |   |   |         |         |  |
| 2253 | 202.85 | 0.055119 | 54 | 28 | 54 | 2 | 0 | 0 | 6.7e-13 | 5.2e-15 |  |
| -    | 202.87 | - out    |    |    |    |   |   |   |         |         |  |
| -    | 202.9  | - out    |    |    |    |   |   |   |         |         |  |
| -    | 202.92 | - out    |    |    |    |   |   |   |         |         |  |
| -    | 202.95 | - out    |    |    |    |   |   |   |         |         |  |
| 2254 | 202.96 | 0.11024  | 56 | 29 | 56 | 2 | 0 | 0 | 9.4e-13 | 3.3e-15 |  |
| -    | 202.98 | - out    |    |    |    |   |   |   |         |         |  |
| -    | 203.01 | - out    |    |    |    |   |   |   |         |         |  |
| -    | 203.03 | - out    |    |    |    |   |   |   |         |         |  |
| -    | 203.06 | - out    |    |    |    |   |   |   |         |         |  |
| 2255 | 203.07 | 0.11024  | 58 | 30 | 58 | 2 | 0 | 0 | 2.2e-13 | 3.4e-15 |  |
| -    | 203.09 | - out    |    |    |    |   |   |   |         |         |  |
| -    | 203.12 | - out    |    |    |    |   |   |   |         |         |  |
| -    | 203.14 | - out    |    |    |    |   |   |   |         |         |  |
| -    | 203.17 | - out    |    |    |    |   |   |   |         |         |  |
| 2256 | 203.18 | 0.11024  | 60 | 31 | 60 | 2 | 0 | 0 | 2.5e-12 | 6.2e-15 |  |
| -    | 203.2  | - out    |    |    |    |   |   |   |         |         |  |
| -    | 203.23 | - out    |    |    |    |   |   |   |         |         |  |
| -    | 203.25 | - out    |    |    |    |   |   |   |         |         |  |
| -    | 203.28 | - out    |    |    |    |   |   |   |         |         |  |
| 2257 | 203.29 | 0.11024  | 62 | 32 | 62 | 2 | 0 | 0 | 3.9e-12 | 5.2e-15 |  |
| -    | 203.31 | - out    |    |    |    |   |   |   |         |         |  |
| -    | 203.34 | - out    |    |    |    |   |   |   |         |         |  |
| -    | 203.36 | - out    |    |    |    |   |   |   |         |         |  |

|      |        |          |    |    |    |   |   |   |         |         |  |
|------|--------|----------|----|----|----|---|---|---|---------|---------|--|
| -    | 203.39 | - out    |    |    |    |   |   |   |         |         |  |
| 2258 | 203.4  | 0.11024  | 64 | 33 | 64 | 2 | 0 | 0 | 7.3e-13 | 4.7e-15 |  |
| -    | 203.42 | - out    |    |    |    |   |   |   |         |         |  |
| -    | 203.45 | - out    |    |    |    |   |   |   |         |         |  |
| -    | 203.47 | - out    |    |    |    |   |   |   |         |         |  |
| -    | 203.5  | - out    |    |    |    |   |   |   |         |         |  |
| -    | 203.53 | - out    |    |    |    |   |   |   |         |         |  |
| -    | 203.56 | - out    |    |    |    |   |   |   |         |         |  |
| -    | 203.58 | - out    |    |    |    |   |   |   |         |         |  |
| -    | 203.61 | - out    |    |    |    |   |   |   |         |         |  |
| 2259 | 203.63 | 0.22048  | 66 | 34 | 66 | 2 | 0 | 0 | 4.4e-14 | 8.4e-15 |  |
| -    | 203.64 | - out    |    |    |    |   |   |   |         |         |  |
| -    | 203.67 | - out    |    |    |    |   |   |   |         |         |  |
| -    | 203.69 | - out    |    |    |    |   |   |   |         |         |  |
| -    | 203.72 | - out    |    |    |    |   |   |   |         |         |  |
| -    | 203.75 | - out    |    |    |    |   |   |   |         |         |  |
| -    | 203.78 | - out    |    |    |    |   |   |   |         |         |  |
| -    | 203.8  | - out    |    |    |    |   |   |   |         |         |  |
| -    | 203.83 | - out    |    |    |    |   |   |   |         |         |  |
| 2260 | 203.85 | 0.22048  | 68 | 35 | 68 | 2 | 0 | 0 | 1e-12   | 3.8e-15 |  |
| -    | 203.86 | - out    |    |    |    |   |   |   |         |         |  |
| -    | 203.89 | - out    |    |    |    |   |   |   |         |         |  |
| -    | 203.91 | - out    |    |    |    |   |   |   |         |         |  |
| -    | 203.94 | - out    |    |    |    |   |   |   |         |         |  |
| -    | 203.97 | - out    |    |    |    |   |   |   |         |         |  |
| 2261 | 203.99 | 0.14225  | 72 | 37 | 72 | 2 | 1 | 0 | 6.8e-13 | 5.6e-15 |  |
| -    | 204    | - out    |    |    |    |   |   |   |         |         |  |
| -    | 204.02 | - out    |    |    |    |   |   |   |         |         |  |
| -    | 204.05 | - out    |    |    |    |   |   |   |         |         |  |
| -    | 204.08 | - out    |    |    |    |   |   |   |         |         |  |
| 2262 | 204.08 | 0.093143 | 76 | 39 | 76 | 2 | 2 | 0 | 2.1e-13 | 3.3e-15 |  |
| -    | 204.11 | - out    |    |    |    |   |   |   |         |         |  |
| -    | 204.13 | - out    |    |    |    |   |   |   |         |         |  |
| -    | 204.16 | - out    |    |    |    |   |   |   |         |         |  |
| 2263 | 204.17 | 0.093143 | 78 | 40 | 78 | 2 | 2 | 0 | 1.6e-13 | 3.6e-15 |  |
| -    | 204.19 | - out    |    |    |    |   |   |   |         |         |  |
| -    | 204.22 | - out    |    |    |    |   |   |   |         |         |  |
| -    | 204.24 | - out    |    |    |    |   |   |   |         |         |  |
| 2264 | 204.25 | 0.077448 | 80 | 41 | 80 | 2 | 2 | 0 | 6.6e-14 | 5.2e-15 |  |
| -    | 204.27 | - out    |    |    |    |   |   |   |         |         |  |
| -    | 204.3  | - out    |    |    |    |   |   |   |         |         |  |
| 2265 | 204.32 | 0.064858 | 82 | 42 | 82 | 2 | 2 | 0 | 1.4e-13 | 4.7e-15 |  |
| -    | 204.33 | - out    |    |    |    |   |   |   |         |         |  |
| -    | 204.35 | - out    |    |    |    |   |   |   |         |         |  |
| 2266 | 204.37 | 0.058372 | 84 | 43 | 84 | 2 | 2 | 0 | 4e-14   | 5e-15   |  |
| -    | 204.38 | - out    |    |    |    |   |   |   |         |         |  |
| -    | 204.41 | - out    |    |    |    |   |   |   |         |         |  |
| 2267 | 204.43 | 0.058372 | 86 | 44 | 86 | 2 | 2 | 0 | 4.3e-14 | 6.4e-15 |  |
| -    | 204.44 | - out    |    |    |    |   |   |   |         |         |  |
| -    | 204.46 | - out    |    |    |    |   |   |   |         |         |  |
| -    | 204.49 | - out    |    |    |    |   |   |   |         |         |  |
| 2268 | 204.49 | 0.058372 | 88 | 45 | 88 | 2 | 2 | 0 | 2.9e-14 | 8.4e-15 |  |
| -    | 204.52 | - out    |    |    |    |   |   |   |         |         |  |
| -    | 204.55 | - out    |    |    |    |   |   |   |         |         |  |
| 2269 | 204.55 | 0.058372 | 90 | 46 | 90 | 2 | 2 | 0 | 1.9e-14 | 1.4e-14 |  |
| -    | 204.57 | - out    |    |    |    |   |   |   |         |         |  |

|      |        |          |     |    |     |   |   |   |         |         |
|------|--------|----------|-----|----|-----|---|---|---|---------|---------|
| -    | 204.6  | - out    |     |    |     |   |   |   |         |         |
| 2270 | 204.61 | 0.058372 | 92  | 47 | 92  | 2 | 2 | 0 | 4.2e-14 | 2.1e-14 |
| -    | 204.63 | - out    |     |    |     |   |   |   |         |         |
| -    | 204.66 | - out    |     |    |     |   |   |   |         |         |
| 2271 | 204.67 | 0.058372 | 94  | 48 | 94  | 2 | 2 | 0 | 1.6e-14 | 3.4e-14 |
| -    | 204.68 | - out    |     |    |     |   |   |   |         |         |
| -    | 204.71 | - out    |     |    |     |   |   |   |         |         |
| -    | 204.74 | - out    |     |    |     |   |   |   |         |         |
| -    | 204.77 | - out    |     |    |     |   |   |   |         |         |
| 2272 | 204.78 | 0.11674  | 96  | 49 | 96  | 2 | 2 | 0 | 3.6e-14 | 2.2e-14 |
| -    | 204.79 | - out    |     |    |     |   |   |   |         |         |
| -    | 204.82 | - out    |     |    |     |   |   |   |         |         |
| -    | 204.85 | - out    |     |    |     |   |   |   |         |         |
| -    | 204.88 | - out    |     |    |     |   |   |   |         |         |
| 2273 | 204.89 | 0.10507  | 98  | 50 | 98  | 2 | 2 | 0 | 4.3e-14 | 7.5e-15 |
| -    | 204.9  | - out    |     |    |     |   |   |   |         |         |
| -    | 204.93 | - out    |     |    |     |   |   |   |         |         |
| -    | 204.96 | - out    |     |    |     |   |   |   |         |         |
| -    | 204.99 | - out    |     |    |     |   |   |   |         |         |
| 2274 | 204.99 | 0.10507  | 100 | 51 | 100 | 2 | 2 | 0 | 1.1e-13 | 6.6e-15 |
| -    | 205.01 | - out    |     |    |     |   |   |   |         |         |
| -    | 205.04 | - out    |     |    |     |   |   |   |         |         |
| -    | 205.07 | - out    |     |    |     |   |   |   |         |         |
| 2275 | 205.08 | 0.089807 | 102 | 52 | 102 | 2 | 2 | 0 | 6.3e-14 | 5.7e-15 |
| -    | 205.1  | - out    |     |    |     |   |   |   |         |         |
| -    | 205.12 | - out    |     |    |     |   |   |   |         |         |
| -    | 205.15 | - out    |     |    |     |   |   |   |         |         |
| 2276 | 205.16 | 0.078493 | 104 | 53 | 104 | 2 | 2 | 0 | 8.3e-14 | 4.8e-15 |
| -    | 205.18 | - out    |     |    |     |   |   |   |         |         |
| -    | 205.21 | - out    |     |    |     |   |   |   |         |         |
| -    | 205.23 | - out    |     |    |     |   |   |   |         |         |
| 2277 | 205.24 | 0.078493 | 106 | 54 | 106 | 2 | 2 | 0 | 1.9e-14 | 6.2e-15 |
| -    | 205.26 | - out    |     |    |     |   |   |   |         |         |
| -    | 205.29 | - out    |     |    |     |   |   |   |         |         |
| -    | 205.32 | - out    |     |    |     |   |   |   |         |         |
| 2278 | 205.32 | 0.078493 | 108 | 55 | 108 | 2 | 2 | 0 | 2.7e-13 | 4.7e-15 |
| -    | 205.34 | - out    |     |    |     |   |   |   |         |         |
| -    | 205.37 | - out    |     |    |     |   |   |   |         |         |
| 2279 | 205.4  | 0.078493 | 110 | 56 | 110 | 2 | 2 | 0 | 2.3e-13 | 5e-15   |
| -    | 205.4  | - out    |     |    |     |   |   |   |         |         |
| -    | 205.43 | - out    |     |    |     |   |   |   |         |         |
| -    | 205.45 | - out    |     |    |     |   |   |   |         |         |
| 2280 | 205.48 | 0.078493 | 112 | 57 | 112 | 2 | 2 | 0 | 1.5e-13 | 4.5e-15 |
| -    | 205.48 | - out    |     |    |     |   |   |   |         |         |
| -    | 205.51 | - out    |     |    |     |   |   |   |         |         |
| -    | 205.54 | - out    |     |    |     |   |   |   |         |         |
| 2281 | 205.55 | 0.070643 | 114 | 58 | 114 | 2 | 2 | 0 | 2e-13   | 5.4e-15 |
| -    | 205.56 | - out    |     |    |     |   |   |   |         |         |
| -    | 205.59 | - out    |     |    |     |   |   |   |         |         |
| 2282 | 205.62 | 0.070643 | 116 | 59 | 116 | 2 | 2 | 0 | 1.6e-13 | 3.4e-15 |
| -    | 205.62 | - out    |     |    |     |   |   |   |         |         |
| -    | 205.65 | - out    |     |    |     |   |   |   |         |         |
| -    | 205.67 | - out    |     |    |     |   |   |   |         |         |
| 2283 | 205.69 | 0.070643 | 118 | 60 | 118 | 2 | 2 | 0 | 4.6e-13 | 5.3e-15 |
| -    | 205.7  | - out    |     |    |     |   |   |   |         |         |
| -    | 205.73 | - out    |     |    |     |   |   |   |         |         |

|      |        |          |     |    |     |   |   |   |         |         |
|------|--------|----------|-----|----|-----|---|---|---|---------|---------|
| -    | 205.76 | - out    |     |    |     |   |   |   |         |         |
| 2284 | 205.76 | 0.070643 | 120 | 61 | 120 | 2 | 2 | 0 | 1.9e-13 | 3.1e-15 |
| -    | 205.78 | - out    |     |    |     |   |   |   |         |         |
| -    | 205.81 | - out    |     |    |     |   |   |   |         |         |
| 2285 | 205.83 | 0.070643 | 122 | 62 | 122 | 2 | 2 | 0 | 9e-14   | 2.9e-15 |
| -    | 205.84 | - out    |     |    |     |   |   |   |         |         |
| -    | 205.87 | - out    |     |    |     |   |   |   |         |         |
| -    | 205.89 | - out    |     |    |     |   |   |   |         |         |
| 2286 | 205.9  | 0.070643 | 124 | 63 | 124 | 2 | 2 | 0 | 2.8e-13 | 6e-15   |
| -    | 205.92 | - out    |     |    |     |   |   |   |         |         |
| -    | 205.95 | - out    |     |    |     |   |   |   |         |         |
| 2287 | 205.97 | 0.070643 | 126 | 64 | 126 | 2 | 2 | 0 | 2.4e-13 | 4.1e-15 |
| -    | 205.98 | - out    |     |    |     |   |   |   |         |         |
| -    | 206    | - out    |     |    |     |   |   |   |         |         |
| -    | 206.03 | - out    |     |    |     |   |   |   |         |         |
| 2288 | 206.04 | 0.070643 | 128 | 65 | 128 | 2 | 2 | 0 | 6.9e-13 | 3.6e-15 |
| -    | 206.06 | - out    |     |    |     |   |   |   |         |         |
| -    | 206.09 | - out    |     |    |     |   |   |   |         |         |
| -    | 206.11 | - out    |     |    |     |   |   |   |         |         |
| -    | 206.14 | - out    |     |    |     |   |   |   |         |         |
| -    | 206.17 | - out    |     |    |     |   |   |   |         |         |
| 2289 | 206.18 | 0.14129  | 130 | 66 | 130 | 2 | 2 | 0 | 2.9e-13 | 4.1e-15 |
| -    | 206.2  | - out    |     |    |     |   |   |   |         |         |
| -    | 206.22 | - out    |     |    |     |   |   |   |         |         |
| -    | 206.25 | - out    |     |    |     |   |   |   |         |         |
| -    | 206.28 | - out    |     |    |     |   |   |   |         |         |
| -    | 206.31 | - out    |     |    |     |   |   |   |         |         |
| 2290 | 206.32 | 0.14129  | 132 | 67 | 132 | 2 | 2 | 0 | 7.5e-14 | 6.1e-15 |
| -    | 206.33 | - out    |     |    |     |   |   |   |         |         |
| -    | 206.36 | - out    |     |    |     |   |   |   |         |         |
| -    | 206.39 | - out    |     |    |     |   |   |   |         |         |
| -    | 206.42 | - out    |     |    |     |   |   |   |         |         |
| -    | 206.44 | - out    |     |    |     |   |   |   |         |         |
| 2291 | 206.46 | 0.14129  | 134 | 68 | 134 | 2 | 2 | 0 | 1.4e-14 | 3.7e-14 |
| -    | 206.46 | - out    |     |    |     |   |   |   |         |         |
| 2292 | 206.61 | 0.14129  | 136 | 69 | 136 | 2 | 2 | 0 | 8.5e-14 | 4.7e-15 |

Number of vertex elements: 3

Number of boundary elements: 112

Number of vertex elements: 3

Number of boundary elements: 112

Number of elements: 534

Minimum element quality: 0.5661

Number of vertex elements: 4

Number of boundary elements: 162

Number of vertex elements: 5

Number of boundary elements: 212

Number of vertex elements: 6

Number of boundary elements: 266

Minimum element quality: 0.07055

Geometry shape function: Linear Lagrange

Time interval 10

Time-dependent solver (BDF)

Number of degrees of freedom solved for: 11758 (plus 7124 internal DOFs).

Nonsymmetric matrix found.

Scales for dependent variables:

Concentration (compl.cOx): 8.3



Concentration (compl.cRed): 5.5

Spatial mesh displacement (compl.spatial.disp): 2.4e-07

| Step                          | Time   | Stepsize | Res | Jac | Sol | Order | Tfail | NLfail | LinErr  | LinRes  |
|-------------------------------|--------|----------|-----|-----|-----|-------|-------|--------|---------|---------|
| -                             | 206.46 | - out    |     |     |     |       |       |        |         |         |
| -                             | 206.47 | - out    |     |     |     |       |       |        |         |         |
| 2293                          | 206.49 | 0.0275   | 2   | 2   | 2   | 1     | 0     | 0      | 2.4e-14 | 2.7e-15 |
| -                             | 206.5  | - out    |     |     |     |       |       |        |         |         |
| 2294                          | 206.52 | 0.0275   | 4   | 3   | 4   | 1     | 0     | 0      | 8.6e-14 | 5e-15   |
| -                             | 206.53 | - out    |     |     |     |       |       |        |         |         |
| -                             | 206.55 | - out    |     |     |     |       |       |        |         |         |
| 2295                          | 206.57 | 0.055    | 6   | 4   | 6   | 2     | 0     | 0      | 2.2e-13 | 2.8e-15 |
| -                             | 206.58 | - out    |     |     |     |       |       |        |         |         |
| -                             | 206.61 | - out    |     |     |     |       |       |        |         |         |
| -                             | 206.64 | - out    |     |     |     |       |       |        |         |         |
| -                             | 206.66 | - out    |     |     |     |       |       |        |         |         |
| 2296                          | 206.68 | 0.11     | 8   | 5   | 8   | 2     | 0     | 0      | 3.9e-13 | 3.9e-15 |
| -                             | 206.69 | - out    |     |     |     |       |       |        |         |         |
| -                             | 206.72 | - out    |     |     |     |       |       |        |         |         |
| -                             | 206.75 | - out    |     |     |     |       |       |        |         |         |
| -                             | 206.77 | - out    |     |     |     |       |       |        |         |         |
| 2297                          | 206.79 | 0.11     | 10  | 6   | 10  | 2     | 0     | 0      | 5.9e-13 | 5.4e-15 |
| -                             | 206.8  | - out    |     |     |     |       |       |        |         |         |
| -                             | 206.83 | - out    |     |     |     |       |       |        |         |         |
| -                             | 206.86 | - out    |     |     |     |       |       |        |         |         |
| -                             | 206.88 | - out    |     |     |     |       |       |        |         |         |
| 2298                          | 206.9  | 0.11     | 12  | 7   | 12  | 2     | 0     | 0      | 2.8e-13 | 4.5e-15 |
| -                             | 206.91 | - out    |     |     |     |       |       |        |         |         |
| -                             | 206.94 | - out    |     |     |     |       |       |        |         |         |
| -                             | 206.97 | - out    |     |     |     |       |       |        |         |         |
| 2299                          | 206.98 | 0.075276 | 16  | 9   | 16  | 2     | 1     | 0      | 2.1e-13 | 4.4e-15 |
| -                             | 206.99 | - out    |     |     |     |       |       |        |         |         |
| -                             | 207.02 | - out    |     |     |     |       |       |        |         |         |
| -                             | 207.05 | - out    |     |     |     |       |       |        |         |         |
| 2300                          | 207.06 | 0.075276 | 18  | 10  | 18  | 2     | 1     | 0      | 8.2e-14 | 4.8e-15 |
| -                             | 207.08 | - out    |     |     |     |       |       |        |         |         |
| -                             | 207.1  | - out    |     |     |     |       |       |        |         |         |
| 2301                          | 207.12 | 0.067408 | 20  | 11  | 20  | 2     | 1     | 0      | 3.5e-13 | 8.3e-15 |
| -                             | 207.13 | - out    |     |     |     |       |       |        |         |         |
| -                             | 207.16 | - out    |     |     |     |       |       |        |         |         |
| 2302                          | 207.18 | 0.057645 | 22  | 12  | 22  | 2     | 1     | 0      | 4.1e-14 | 4.9e-15 |
| Reassembling sparsity pattern |        |          |     |     |     |       |       |        |         |         |
| -                             | 207.19 | - out    |     |     |     |       |       |        |         |         |
| -                             | 207.21 | - out    |     |     |     |       |       |        |         |         |
| 2303                          | 207.23 | 0.05188  | 24  | 13  | 24  | 2     | 1     | 0      | 4.3e-15 | 3.2e-16 |
| -                             | 207.24 | - out    |     |     |     |       |       |        |         |         |
| -                             | 207.27 | - out    |     |     |     |       |       |        |         |         |
| 2304                          | 207.28 | 0.05188  | 26  | 14  | 26  | 2     | 1     | 0      | 2e-14   | 4.5e-16 |
| -                             | 207.3  | - out    |     |     |     |       |       |        |         |         |
| -                             | 207.32 | - out    |     |     |     |       |       |        |         |         |
| 2305                          | 207.33 | 0.046692 | 28  | 15  | 28  | 2     | 1     | 0      | 3.2e-15 | 3.3e-16 |
| -                             | 207.35 | - out    |     |     |     |       |       |        |         |         |
| -                             | 207.38 | - out    |     |     |     |       |       |        |         |         |
| 2306                          | 207.38 | 0.046692 | 30  | 16  | 30  | 2     | 1     | 0      | 4.7e-15 | 3.5e-16 |
| -                             | 207.41 | - out    |     |     |     |       |       |        |         |         |
| 2307                          | 207.42 | 0.046692 | 32  | 17  | 32  | 2     | 1     | 0      | 7.4e-15 | 4.8e-16 |
| -                             | 207.43 | - out    |     |     |     |       |       |        |         |         |

|      |        |          |    |    |    |   |   |   |         |         |  |
|------|--------|----------|----|----|----|---|---|---|---------|---------|--|
| -    | 207.46 | - out    |    |    |    |   |   |   |         |         |  |
| 2308 | 207.47 | 0.046692 | 34 | 18 | 34 | 2 | 1 | 0 | 5.4e-14 | 2.9e-15 |  |
| -    | 207.49 | - out    |    |    |    |   |   |   |         |         |  |
| -    | 207.52 | - out    |    |    |    |   |   |   |         |         |  |
| 2309 | 207.52 | 0.046692 | 36 | 19 | 36 | 2 | 1 | 0 | 2.4e-14 | 3.8e-15 |  |
| -    | 207.54 | - out    |    |    |    |   |   |   |         |         |  |
| 2310 | 207.56 | 0.046692 | 38 | 20 | 38 | 2 | 1 | 0 | 5.4e-14 | 4.9e-15 |  |
| -    | 207.57 | - out    |    |    |    |   |   |   |         |         |  |
| -    | 207.6  | - out    |    |    |    |   |   |   |         |         |  |
| 2311 | 207.61 | 0.046692 | 40 | 21 | 40 | 2 | 1 | 0 | 1e-13   | 4.8e-15 |  |
| -    | 207.63 | - out    |    |    |    |   |   |   |         |         |  |
| -    | 207.65 | - out    |    |    |    |   |   |   |         |         |  |
| 2312 | 207.66 | 0.046692 | 42 | 22 | 42 | 2 | 1 | 0 | 1.3e-14 | 3.7e-15 |  |
| -    | 207.68 | - out    |    |    |    |   |   |   |         |         |  |
| 2313 | 207.7  | 0.046692 | 44 | 23 | 44 | 2 | 1 | 0 | 1.4e-13 | 5.6e-15 |  |
| -    | 207.71 | - out    |    |    |    |   |   |   |         |         |  |
| -    | 207.74 | - out    |    |    |    |   |   |   |         |         |  |
| 2314 | 207.75 | 0.046692 | 46 | 24 | 46 | 2 | 1 | 0 | 2.6e-14 | 5.8e-15 |  |
| -    | 207.76 | - out    |    |    |    |   |   |   |         |         |  |
| -    | 207.79 | - out    |    |    |    |   |   |   |         |         |  |
| 2315 | 207.8  | 0.046692 | 48 | 25 | 48 | 2 | 1 | 0 | 1.3e-14 | 1.2e-14 |  |
| -    | 207.82 | - out    |    |    |    |   |   |   |         |         |  |
| -    | 207.85 | - out    |    |    |    |   |   |   |         |         |  |
| -    | 207.87 | - out    |    |    |    |   |   |   |         |         |  |
| 2316 | 207.89 | 0.093384 | 50 | 26 | 50 | 2 | 1 | 0 | 3.9e-14 | 3.5e-15 |  |
| -    | 207.9  | - out    |    |    |    |   |   |   |         |         |  |
| -    | 207.93 | - out    |    |    |    |   |   |   |         |         |  |
| -    | 207.96 | - out    |    |    |    |   |   |   |         |         |  |
| 2317 | 207.98 | 0.084046 | 52 | 27 | 52 | 2 | 1 | 0 | 9.7e-14 | 5e-15   |  |
| -    | 207.98 | - out    |    |    |    |   |   |   |         |         |  |
| -    | 208.01 | - out    |    |    |    |   |   |   |         |         |  |
| -    | 208.04 | - out    |    |    |    |   |   |   |         |         |  |
| 2318 | 208.06 | 0.084046 | 54 | 28 | 54 | 2 | 1 | 0 | 1.4e-13 | 4e-15   |  |
| -    | 208.07 | - out    |    |    |    |   |   |   |         |         |  |
| -    | 208.09 | - out    |    |    |    |   |   |   |         |         |  |
| -    | 208.12 | - out    |    |    |    |   |   |   |         |         |  |
| 2319 | 208.13 | 0.075641 | 56 | 29 | 56 | 2 | 1 | 0 | 5.4e-14 | 3.1e-15 |  |
| -    | 208.15 | - out    |    |    |    |   |   |   |         |         |  |
| -    | 208.18 | - out    |    |    |    |   |   |   |         |         |  |
| -    | 208.2  | - out    |    |    |    |   |   |   |         |         |  |
| 2320 | 208.21 | 0.075641 | 58 | 30 | 58 | 2 | 1 | 0 | 4.5e-13 | 4.2e-15 |  |
| -    | 208.23 | - out    |    |    |    |   |   |   |         |         |  |
| -    | 208.26 | - out    |    |    |    |   |   |   |         |         |  |
| -    | 208.29 | - out    |    |    |    |   |   |   |         |         |  |
| 2321 | 208.29 | 0.075641 | 60 | 31 | 60 | 2 | 1 | 0 | 3.3e-13 | 4.3e-15 |  |
| -    | 208.31 | - out    |    |    |    |   |   |   |         |         |  |
| -    | 208.34 | - out    |    |    |    |   |   |   |         |         |  |
| 2322 | 208.36 | 0.075641 | 62 | 32 | 62 | 2 | 1 | 0 | 3.8e-13 | 3.9e-15 |  |
| -    | 208.37 | - out    |    |    |    |   |   |   |         |         |  |
| -    | 208.4  | - out    |    |    |    |   |   |   |         |         |  |
| -    | 208.42 | - out    |    |    |    |   |   |   |         |         |  |
| 2323 | 208.44 | 0.075641 | 64 | 33 | 64 | 2 | 1 | 0 | 5.6e-13 | 2.8e-15 |  |
| -    | 208.45 | - out    |    |    |    |   |   |   |         |         |  |
| -    | 208.48 | - out    |    |    |    |   |   |   |         |         |  |
| -    | 208.51 | - out    |    |    |    |   |   |   |         |         |  |
| 2324 | 208.51 | 0.075641 | 66 | 34 | 66 | 2 | 1 | 0 | 4.7e-13 | 3.9e-15 |  |

|      |        |          |     |    |    |    |   |   |   |         |         |
|------|--------|----------|-----|----|----|----|---|---|---|---------|---------|
| -    | 208.53 | -        | out |    |    |    |   |   |   |         |         |
| -    | 208.56 | -        | out |    |    |    |   |   |   |         |         |
| -    | 208.59 | -        | out |    |    |    |   |   |   |         |         |
| 2325 | 208.59 | 0.075641 |     | 68 | 35 | 68 | 2 | 1 | 0 | 7.3e-14 | 3.4e-15 |
| -    | 208.62 | -        | out |    |    |    |   |   |   |         |         |
| -    | 208.64 | -        | out |    |    |    |   |   |   |         |         |
| -    | 208.67 | -        | out |    |    |    |   |   |   |         |         |
| -    | 208.7  | -        | out |    |    |    |   |   |   |         |         |
| -    | 208.73 | -        | out |    |    |    |   |   |   |         |         |
| 2326 | 208.74 | 0.15128  |     | 70 | 36 | 70 | 2 | 1 | 0 | 8.5e-13 | 3.1e-15 |
| -    | 208.75 | -        | out |    |    |    |   |   |   |         |         |
| -    | 208.78 | -        | out |    |    |    |   |   |   |         |         |
| -    | 208.81 | -        | out |    |    |    |   |   |   |         |         |
| -    | 208.84 | -        | out |    |    |    |   |   |   |         |         |
| -    | 208.86 | -        | out |    |    |    |   |   |   |         |         |
| -    | 208.89 | -        | out |    |    |    |   |   |   |         |         |
| 2327 | 208.89 | 0.15128  |     | 72 | 37 | 72 | 2 | 1 | 0 | 6.7e-13 | 3.6e-15 |
| -    | 208.92 | -        | out |    |    |    |   |   |   |         |         |
| -    | 208.95 | -        | out |    |    |    |   |   |   |         |         |
| -    | 208.97 | -        | out |    |    |    |   |   |   |         |         |
| -    | 209    | -        | out |    |    |    |   |   |   |         |         |
| -    | 209.03 | -        | out |    |    |    |   |   |   |         |         |
| 2328 | 209.04 | 0.15128  |     | 74 | 38 | 74 | 2 | 1 | 0 | 5.8e-13 | 4.7e-15 |
| -    | 209.06 | -        | out |    |    |    |   |   |   |         |         |
| -    | 209.08 | -        | out |    |    |    |   |   |   |         |         |
| -    | 209.11 | -        | out |    |    |    |   |   |   |         |         |
| -    | 209.14 | -        | out |    |    |    |   |   |   |         |         |
| -    | 209.17 | -        | out |    |    |    |   |   |   |         |         |
| -    | 209.19 | -        | out |    |    |    |   |   |   |         |         |
| 2329 | 209.19 | 0.15128  |     | 76 | 39 | 76 | 2 | 1 | 0 | 7.4e-14 | 5e-15   |
| -    | 209.22 | -        | out |    |    |    |   |   |   |         |         |
| -    | 209.25 | -        | out |    |    |    |   |   |   |         |         |
| -    | 209.28 | -        | out |    |    |    |   |   |   |         |         |
| -    | 209.3  | -        | out |    |    |    |   |   |   |         |         |
| -    | 209.33 | -        | out |    |    |    |   |   |   |         |         |
| 2330 | 209.35 | 0.15128  |     | 78 | 40 | 78 | 2 | 1 | 0 | 4.3e-13 | 3.6e-15 |
| -    | 209.36 | -        | out |    |    |    |   |   |   |         |         |
| -    | 209.39 | -        | out |    |    |    |   |   |   |         |         |
| -    | 209.41 | -        | out |    |    |    |   |   |   |         |         |
| -    | 209.44 | -        | out |    |    |    |   |   |   |         |         |
| -    | 209.47 | -        | out |    |    |    |   |   |   |         |         |
| -    | 209.5  | -        | out |    |    |    |   |   |   |         |         |
| 2331 | 209.5  | 0.15128  |     | 80 | 41 | 80 | 2 | 1 | 0 | 7.1e-13 | 5.4e-15 |
| -    | 209.52 | -        | out |    |    |    |   |   |   |         |         |
| -    | 209.55 | -        | out |    |    |    |   |   |   |         |         |
| 2332 | 209.57 | 0.073805 |     | 84 | 43 | 84 | 2 | 2 | 0 | 3e-13   | 4.4e-15 |
| -    | 209.58 | -        | out |    |    |    |   |   |   |         |         |
| -    | 209.61 | -        | out |    |    |    |   |   |   |         |         |
| -    | 209.63 | -        | out |    |    |    |   |   |   |         |         |
| 2333 | 209.64 | 0.073805 |     | 86 | 44 | 86 | 2 | 2 | 0 | 1e-13   | 3.3e-15 |
| -    | 209.66 | -        | out |    |    |    |   |   |   |         |         |
| -    | 209.69 | -        | out |    |    |    |   |   |   |         |         |
| 2334 | 209.71 | 0.066425 |     | 88 | 45 | 88 | 2 | 2 | 0 | 1.2e-13 | 4.8e-15 |
| -    | 209.72 | -        | out |    |    |    |   |   |   |         |         |
| -    | 209.74 | -        | out |    |    |    |   |   |   |         |         |
| 2335 | 209.77 | 0.059416 |     | 90 | 46 | 90 | 2 | 2 | 0 | 1.3e-13 | 5.4e-15 |

|      |        |          |     |    |     |   |   |   |         |         |
|------|--------|----------|-----|----|-----|---|---|---|---------|---------|
| -    | 209.77 | - out    |     |    |     |   |   |   |         |         |
| -    | 209.8  | - out    |     |    |     |   |   |   |         |         |
| 2336 | 209.82 | 0.053475 | 92  | 47 | 92  | 2 | 2 | 0 | 8.1e-14 | 6.1e-15 |
| -    | 209.83 | - out    |     |    |     |   |   |   |         |         |
| -    | 209.85 | - out    |     |    |     |   |   |   |         |         |
| 2337 | 209.88 | 0.053475 | 94  | 48 | 94  | 2 | 2 | 0 | 1.1e-13 | 7.9e-15 |
| -    | 209.88 | - out    |     |    |     |   |   |   |         |         |
| -    | 209.91 | - out    |     |    |     |   |   |   |         |         |
| 2338 | 209.93 | 0.053475 | 96  | 49 | 96  | 2 | 2 | 0 | 5.4e-14 | 9.6e-15 |
| -    | 209.94 | - out    |     |    |     |   |   |   |         |         |
| -    | 209.96 | - out    |     |    |     |   |   |   |         |         |
| 2339 | 209.98 | 0.053475 | 98  | 50 | 98  | 2 | 2 | 0 | 7.8e-14 | 1.2e-14 |
| -    | 209.99 | - out    |     |    |     |   |   |   |         |         |
| -    | 210.02 | - out    |     |    |     |   |   |   |         |         |
| 2340 | 210.04 | 0.053475 | 100 | 51 | 100 | 2 | 2 | 0 | 8.1e-14 | 1.1e-14 |
| -    | 210.05 | - out    |     |    |     |   |   |   |         |         |
| -    | 210.07 | - out    |     |    |     |   |   |   |         |         |
| 2341 | 210.09 | 0.053475 | 102 | 52 | 102 | 2 | 2 | 0 | 9.7e-14 | 1.1e-14 |
| -    | 210.1  | - out    |     |    |     |   |   |   |         |         |
| -    | 210.13 | - out    |     |    |     |   |   |   |         |         |
| 2342 | 210.14 | 0.053475 | 104 | 53 | 104 | 2 | 2 | 0 | 2.1e-14 | 1.2e-14 |
| -    | 210.16 | - out    |     |    |     |   |   |   |         |         |
| -    | 210.18 | - out    |     |    |     |   |   |   |         |         |
| 2343 | 210.2  | 0.053475 | 106 | 54 | 106 | 2 | 2 | 0 | 3.2e-14 | 1.4e-14 |
| -    | 210.21 | - out    |     |    |     |   |   |   |         |         |
| -    | 210.24 | - out    |     |    |     |   |   |   |         |         |
| -    | 210.27 | - out    |     |    |     |   |   |   |         |         |
| -    | 210.29 | - out    |     |    |     |   |   |   |         |         |
| 2344 | 210.3  | 0.10695  | 108 | 55 | 108 | 2 | 2 | 0 | 2.7e-14 | 7.5e-14 |
| -    | 210.32 | - out    |     |    |     |   |   |   |         |         |
| -    | 210.35 | - out    |     |    |     |   |   |   |         |         |
| -    | 210.38 | - out    |     |    |     |   |   |   |         |         |
| -    | 210.4  | - out    |     |    |     |   |   |   |         |         |
| 2345 | 210.41 | 0.10695  | 110 | 56 | 110 | 2 | 2 | 0 | 7.3e-14 | 7.5e-15 |
| -    | 210.43 | - out    |     |    |     |   |   |   |         |         |
| -    | 210.46 | - out    |     |    |     |   |   |   |         |         |
| -    | 210.49 | - out    |     |    |     |   |   |   |         |         |
| -    | 210.51 | - out    |     |    |     |   |   |   |         |         |
| 2346 | 210.52 | 0.10695  | 112 | 57 | 112 | 2 | 2 | 0 | 3.7e-14 | 6.3e-15 |
| -    | 210.54 | - out    |     |    |     |   |   |   |         |         |
| -    | 210.57 | - out    |     |    |     |   |   |   |         |         |
| -    | 210.6  | - out    |     |    |     |   |   |   |         |         |
| 2347 | 210.61 | 0.089197 | 114 | 58 | 114 | 2 | 2 | 0 | 6e-14   | 5.8e-15 |
| -    | 210.62 | - out    |     |    |     |   |   |   |         |         |
| -    | 210.65 | - out    |     |    |     |   |   |   |         |         |
| -    | 210.68 | - out    |     |    |     |   |   |   |         |         |
| 2348 | 210.69 | 0.077948 | 116 | 59 | 116 | 2 | 2 | 0 | 7.3e-14 | 4.6e-15 |
| -    | 210.71 | - out    |     |    |     |   |   |   |         |         |
| -    | 210.73 | - out    |     |    |     |   |   |   |         |         |
| 2349 | 210.76 | 0.070153 | 118 | 60 | 118 | 2 | 2 | 0 | 3.1e-14 | 6.3e-15 |
| -    | 210.76 | - out    |     |    |     |   |   |   |         |         |
| -    | 210.79 | - out    |     |    |     |   |   |   |         |         |
| -    | 210.82 | - out    |     |    |     |   |   |   |         |         |
| 2350 | 210.83 | 0.070153 | 120 | 61 | 120 | 2 | 2 | 0 | 5.3e-14 | 3.6e-15 |
| -    | 210.84 | - out    |     |    |     |   |   |   |         |         |
| -    | 210.87 | - out    |     |    |     |   |   |   |         |         |

|      |        |          |     |    |     |   |   |   |         |         |
|------|--------|----------|-----|----|-----|---|---|---|---------|---------|
| 2351 | 210.9  | 0.070153 | 122 | 62 | 122 | 2 | 2 | 0 | 1.5e-13 | 3.1e-15 |
| -    | 210.9  | - out    |     |    |     |   |   |   |         |         |
| -    | 210.93 | - out    |     |    |     |   |   |   |         |         |
| -    | 210.95 | - out    |     |    |     |   |   |   |         |         |
| 2352 | 210.97 | 0.070153 | 124 | 63 | 124 | 2 | 2 | 0 | 2.2e-13 | 4.6e-15 |
| -    | 210.98 | - out    |     |    |     |   |   |   |         |         |
| -    | 211.01 | - out    |     |    |     |   |   |   |         |         |
| -    | 211.04 | - out    |     |    |     |   |   |   |         |         |
| 2353 | 211.04 | 0.070153 | 126 | 64 | 126 | 2 | 2 | 0 | 1.5e-13 | 5.2e-15 |
| -    | 211.06 | - out    |     |    |     |   |   |   |         |         |
| -    | 211.09 | - out    |     |    |     |   |   |   |         |         |
| 2354 | 211.11 | 0.070153 | 128 | 65 | 128 | 2 | 2 | 0 | 1.4e-13 | 2.7e-15 |
| -    | 211.12 | - out    |     |    |     |   |   |   |         |         |
| -    | 211.15 | - out    |     |    |     |   |   |   |         |         |
| -    | 211.17 | - out    |     |    |     |   |   |   |         |         |
| 2355 | 211.18 | 0.070153 | 130 | 66 | 130 | 2 | 2 | 0 | 2.1e-13 | 3.7e-15 |
| -    | 211.2  | - out    |     |    |     |   |   |   |         |         |
| -    | 211.23 | - out    |     |    |     |   |   |   |         |         |
| 2356 | 211.25 | 0.070153 | 132 | 67 | 132 | 2 | 2 | 0 | 2.1e-13 | 2.7e-15 |
| -    | 211.26 | - out    |     |    |     |   |   |   |         |         |
| -    | 211.28 | - out    |     |    |     |   |   |   |         |         |
| -    | 211.31 | - out    |     |    |     |   |   |   |         |         |
| 2357 | 211.32 | 0.070153 | 134 | 68 | 134 | 2 | 2 | 0 | 2.8e-13 | 4.2e-15 |
| -    | 211.34 | - out    |     |    |     |   |   |   |         |         |
| -    | 211.37 | - out    |     |    |     |   |   |   |         |         |
| 2358 | 211.39 | 0.070153 | 136 | 69 | 136 | 2 | 2 | 0 | 8.7e-14 | 3.7e-15 |
| -    | 211.39 | - out    |     |    |     |   |   |   |         |         |
| -    | 211.42 | - out    |     |    |     |   |   |   |         |         |
| -    | 211.45 | - out    |     |    |     |   |   |   |         |         |
| 2359 | 211.46 | 0.070153 | 138 | 70 | 138 | 2 | 2 | 0 | 5.2e-13 | 3e-15   |
| -    | 211.48 | - out    |     |    |     |   |   |   |         |         |
| -    | 211.5  | - out    |     |    |     |   |   |   |         |         |
| 2360 | 211.53 | 0.070153 | 140 | 71 | 140 | 2 | 2 | 0 | 2.9e-13 | 5.2e-15 |
| -    | 211.53 | - out    |     |    |     |   |   |   |         |         |
| -    | 211.56 | - out    |     |    |     |   |   |   |         |         |
| -    | 211.59 | - out    |     |    |     |   |   |   |         |         |
| 2361 | 211.6  | 0.070153 | 142 | 72 | 142 | 2 | 2 | 0 | 3.1e-13 | 4.1e-15 |
| -    | 211.61 | - out    |     |    |     |   |   |   |         |         |
| -    | 211.64 | - out    |     |    |     |   |   |   |         |         |
| -    | 211.67 | - out    |     |    |     |   |   |   |         |         |
| 2362 | 211.67 | 0.070153 | 144 | 73 | 144 | 2 | 2 | 0 | 2.1e-13 | 4.5e-15 |
| -    | 211.7  | - out    |     |    |     |   |   |   |         |         |
| -    | 211.72 | - out    |     |    |     |   |   |   |         |         |
| 2363 | 211.74 | 0.070153 | 146 | 74 | 146 | 2 | 2 | 0 | 8.7e-14 | 5.7e-15 |
| -    | 211.75 | - out    |     |    |     |   |   |   |         |         |
| -    | 211.78 | - out    |     |    |     |   |   |   |         |         |
| -    | 211.81 | - out    |     |    |     |   |   |   |         |         |
| 2364 | 211.81 | 0.070153 | 148 | 75 | 148 | 2 | 2 | 0 | 8.6e-14 | 4.8e-15 |
| -    | 211.83 | - out    |     |    |     |   |   |   |         |         |
| -    | 211.86 | - out    |     |    |     |   |   |   |         |         |
| 2365 | 211.88 | 0.070153 | 150 | 76 | 150 | 2 | 2 | 0 | 2.4e-13 | 4e-15   |
| -    | 211.89 | - out    |     |    |     |   |   |   |         |         |
| -    | 211.92 | - out    |     |    |     |   |   |   |         |         |
| -    | 211.94 | - out    |     |    |     |   |   |   |         |         |
| 2366 | 211.95 | 0.070153 | 152 | 77 | 152 | 2 | 2 | 0 | 8.4e-14 | 9.1e-15 |
| -    | 211.97 | - out    |     |    |     |   |   |   |         |         |

|      |        |          |     |    |     |   |   |   |         |         |
|------|--------|----------|-----|----|-----|---|---|---|---------|---------|
| -    | 212    | - out    |     |    |     |   |   |   |         |         |
| 2367 | 212.02 | 0.070153 | 154 | 78 | 154 | 2 | 2 | 0 | 5.7e-14 | 4.5e-15 |
| -    | 212.03 | - out    |     |    |     |   |   |   |         |         |
| -    | 212.05 | - out    |     |    |     |   |   |   |         |         |
| -    | 212.08 | - out    |     |    |     |   |   |   |         |         |
| 2368 | 212.09 | 0.070153 | 156 | 79 | 156 | 2 | 2 | 0 | 2.5e-13 | 4.5e-15 |
| -    | 212.11 | - out    |     |    |     |   |   |   |         |         |
| -    | 212.14 | - out    |     |    |     |   |   |   |         |         |
| 2369 | 212.16 | 0.070153 | 158 | 80 | 158 | 2 | 2 | 0 | 7.5e-13 | 7.6e-15 |
| -    | 212.16 | - out    |     |    |     |   |   |   |         |         |
| -    | 212.19 | - out    |     |    |     |   |   |   |         |         |
| -    | 212.22 | - out    |     |    |     |   |   |   |         |         |
| 2370 | 212.23 | 0.070153 | 160 | 81 | 160 | 2 | 2 | 0 | 2.4e-13 | 3.6e-15 |
| -    | 212.25 | - out    |     |    |     |   |   |   |         |         |
| -    | 212.27 | - out    |     |    |     |   |   |   |         |         |
| 2371 | 212.3  | 0.070153 | 162 | 82 | 162 | 2 | 2 | 0 | 1.2e-12 | 5.7e-15 |
| -    | 212.3  | - out    |     |    |     |   |   |   |         |         |
| -    | 212.33 | - out    |     |    |     |   |   |   |         |         |
| -    | 212.36 | - out    |     |    |     |   |   |   |         |         |
| 2372 | 212.37 | 0.070153 | 164 | 83 | 164 | 2 | 2 | 0 | 1.5e-12 | 6.6e-15 |
| -    | 212.38 | - out    |     |    |     |   |   |   |         |         |
| -    | 212.41 | - out    |     |    |     |   |   |   |         |         |
| 2373 | 212.43 | 0.06025  | 166 | 84 | 166 | 2 | 2 | 0 | 4.9e-13 | 5.7e-15 |
| -    | 212.44 | - out    |     |    |     |   |   |   |         |         |
| -    | 212.47 | - out    |     |    |     |   |   |   |         |         |
| 2374 | 212.48 | 0.05275  | 168 | 85 | 168 | 2 | 2 | 0 | 2.6e-13 | 7e-15   |
| -    | 212.49 | - out    |     |    |     |   |   |   |         |         |
| -    | 212.52 | - out    |     |    |     |   |   |   |         |         |
| 2375 | 212.53 | 0.047475 | 170 | 86 | 170 | 2 | 2 | 0 | 2e-13   | 1.1e-14 |
| -    | 212.55 | - out    |     |    |     |   |   |   |         |         |
| 2376 | 212.57 | 0.042727 | 172 | 87 | 172 | 2 | 2 | 0 | 2.4e-13 | 3.3e-15 |
| -    | 212.58 | - out    |     |    |     |   |   |   |         |         |
| -    | 212.6  | - out    |     |    |     |   |   |   |         |         |
| 2377 | 212.62 | 0.042727 | 174 | 88 | 174 | 2 | 2 | 0 | 1.7e-13 | 3.2e-15 |
| -    | 212.63 | - out    |     |    |     |   |   |   |         |         |
| 2378 | 212.65 | 0.038455 | 176 | 89 | 176 | 2 | 2 | 0 | 9.5e-14 | 4e-15   |
| -    | 212.66 | - out    |     |    |     |   |   |   |         |         |
| -    | 212.69 | - out    |     |    |     |   |   |   |         |         |
| 2379 | 212.69 | 0.038455 | 178 | 90 | 178 | 2 | 2 | 0 | 1.2e-13 | 4.3e-15 |
| -    | 212.71 | - out    |     |    |     |   |   |   |         |         |
| 2380 | 212.73 | 0.038455 | 180 | 91 | 180 | 2 | 2 | 0 | 9.6e-14 | 4.7e-15 |
| -    | 212.74 | - out    |     |    |     |   |   |   |         |         |
| -    | 212.77 | - out    |     |    |     |   |   |   |         |         |
| 2381 | 212.77 | 0.038455 | 182 | 92 | 182 | 2 | 2 | 0 | 3.2e-14 | 3.1e-15 |
| -    | 212.8  | - out    |     |    |     |   |   |   |         |         |
| 2382 | 212.81 | 0.038455 | 184 | 93 | 184 | 2 | 2 | 0 | 4.8e-14 | 5.2e-15 |
| -    | 212.82 | - out    |     |    |     |   |   |   |         |         |
| 2383 | 212.85 | 0.038455 | 186 | 94 | 186 | 2 | 2 | 0 | 4.4e-14 | 5.9e-15 |
| -    | 212.85 | - out    |     |    |     |   |   |   |         |         |
| -    | 212.88 | - out    |     |    |     |   |   |   |         |         |
| 2384 | 212.88 | 0.038455 | 188 | 95 | 188 | 2 | 2 | 0 | 2.7e-14 | 4.5e-15 |
| -    | 212.91 | - out    |     |    |     |   |   |   |         |         |
| 2385 | 212.92 | 0.038455 | 190 | 96 | 190 | 2 | 2 | 0 | 1.3e-14 | 4.7e-15 |
| -    | 212.93 | - out    |     |    |     |   |   |   |         |         |
| -    | 212.96 | - out    |     |    |     |   |   |   |         |         |
| 2386 | 212.96 | 0.038455 | 192 | 97 | 192 | 2 | 2 | 0 | 2e-14   | 3.7e-15 |

|      |        |          |     |     |     |   |   |   |         |         |
|------|--------|----------|-----|-----|-----|---|---|---|---------|---------|
| -    | 212.99 | - out    |     |     |     |   |   |   |         |         |
| 2387 | 213    | 0.038455 | 194 | 98  | 194 | 2 | 2 | 0 | 3.1e-14 | 5e-15   |
| -    | 213.02 | - out    |     |     |     |   |   |   |         |         |
| 2388 | 213.04 | 0.038455 | 196 | 99  | 196 | 2 | 2 | 0 | 3.8e-14 | 4.7e-15 |
| -    | 213.04 | - out    |     |     |     |   |   |   |         |         |
| -    | 213.07 | - out    |     |     |     |   |   |   |         |         |
| 2389 | 213.08 | 0.038455 | 198 | 100 | 198 | 2 | 2 | 0 | 5.9e-14 | 5.1e-15 |
| -    | 213.1  | - out    |     |     |     |   |   |   |         |         |
| 2390 | 213.12 | 0.038455 | 200 | 101 | 200 | 2 | 2 | 0 | 5.2e-14 | 5.9e-15 |
| -    | 213.13 | - out    |     |     |     |   |   |   |         |         |
| -    | 213.15 | - out    |     |     |     |   |   |   |         |         |
| 2391 | 213.15 | 0.038455 | 202 | 102 | 202 | 2 | 2 | 0 | 3.6e-14 | 3.9e-15 |
| -    | 213.18 | - out    |     |     |     |   |   |   |         |         |
| 2392 | 213.19 | 0.038455 | 204 | 103 | 204 | 2 | 2 | 0 | 2.6e-14 | 5.3e-15 |
| -    | 213.21 | - out    |     |     |     |   |   |   |         |         |
| -    | 213.24 | - out    |     |     |     |   |   |   |         |         |
| -    | 213.26 | - out    |     |     |     |   |   |   |         |         |
| 2393 | 213.27 | 0.076909 | 206 | 104 | 206 | 2 | 2 | 0 | 1.7e-14 | 8e-15   |
| -    | 213.29 | - out    |     |     |     |   |   |   |         |         |
| -    | 213.32 | - out    |     |     |     |   |   |   |         |         |
| -    | 213.35 | - out    |     |     |     |   |   |   |         |         |
| 2394 | 213.35 | 0.076909 | 208 | 105 | 208 | 2 | 2 | 0 | 8.1e-14 | 5.3e-15 |
| -    | 213.37 | - out    |     |     |     |   |   |   |         |         |
| -    | 213.4  | - out    |     |     |     |   |   |   |         |         |
| 2395 | 213.42 | 0.076909 | 210 | 106 | 210 | 2 | 2 | 0 | 2.5e-13 | 4.1e-15 |
| -    | 213.43 | - out    |     |     |     |   |   |   |         |         |
| -    | 213.46 | - out    |     |     |     |   |   |   |         |         |
| -    | 213.48 | - out    |     |     |     |   |   |   |         |         |
| 2396 | 213.5  | 0.076909 | 212 | 107 | 212 | 2 | 2 | 0 | 4.7e-14 | 3.1e-15 |
| -    | 213.51 | - out    |     |     |     |   |   |   |         |         |
| -    | 213.54 | - out    |     |     |     |   |   |   |         |         |
| -    | 213.57 | - out    |     |     |     |   |   |   |         |         |
| 2397 | 213.58 | 0.076909 | 214 | 108 | 214 | 2 | 2 | 0 | 1.6e-13 | 3.2e-15 |
| -    | 213.59 | - out    |     |     |     |   |   |   |         |         |
| -    | 213.62 | - out    |     |     |     |   |   |   |         |         |
| -    | 213.65 | - out    |     |     |     |   |   |   |         |         |
| 2398 | 213.65 | 0.076909 | 216 | 109 | 216 | 2 | 2 | 0 | 1.7e-13 | 3.6e-15 |
| -    | 213.68 | - out    |     |     |     |   |   |   |         |         |
| -    | 213.7  | - out    |     |     |     |   |   |   |         |         |
| -    | 213.73 | - out    |     |     |     |   |   |   |         |         |
| 2399 | 213.73 | 0.076909 | 218 | 110 | 218 | 2 | 2 | 0 | 7.7e-14 | 4e-15   |
| -    | 213.76 | - out    |     |     |     |   |   |   |         |         |
| -    | 213.79 | - out    |     |     |     |   |   |   |         |         |
| 2400 | 213.81 | 0.076909 | 220 | 111 | 220 | 2 | 2 | 0 | 6.2e-13 | 4.2e-15 |
| -    | 213.81 | - out    |     |     |     |   |   |   |         |         |
| -    | 213.84 | - out    |     |     |     |   |   |   |         |         |
| -    | 213.87 | - out    |     |     |     |   |   |   |         |         |
| 2401 | 213.88 | 0.076909 | 222 | 112 | 222 | 2 | 2 | 0 | 2.3e-13 | 3.7e-15 |
| -    | 213.9  | - out    |     |     |     |   |   |   |         |         |
| -    | 213.92 | - out    |     |     |     |   |   |   |         |         |
| -    | 213.95 | - out    |     |     |     |   |   |   |         |         |
| 2402 | 213.96 | 0.076909 | 224 | 113 | 224 | 2 | 2 | 0 | 4.1e-13 | 3.2e-15 |
| -    | 213.98 | - out    |     |     |     |   |   |   |         |         |
| -    | 214.01 | - out    |     |     |     |   |   |   |         |         |
| -    | 214.03 | - out    |     |     |     |   |   |   |         |         |
| 2403 | 214.04 | 0.076909 | 226 | 114 | 226 | 2 | 2 | 0 | 2.6e-13 | 4.2e-15 |

```

-      214.06      - out
-      214.09      - out
-      214.12      - out
2404   214.12      0.076909      228  115  228      2      2      0      9e-14      3e-15
-      214.14      - out
-      214.17      - out
-      214.2       - out
-      214.23      - out
-      214.25      - out
2405   214.27      0.15382      230  116  230      2      2      0      2.4e-12      5.1e-15
-      214.28      - out
-      214.31      - out
-      214.34      - out
-      214.36      - out
-      214.39      - out
-      214.42      - out
2406   214.42      0.15382      232  117  232      2      2      0      6.3e-13      3.8e-15
-      214.45      - out
-      214.47      - out
-      214.5       - out
2407   214.58      0.15382      234  118  234      2      2      0      1.8e-13      7.7e-15

```

Time-stepping completed.

Geometry shape function: Linear Lagrange

Solution time: 1411 s. (23 minutes, 31 seconds)

Physical memory: 2.85 GB

Virtual memory: 2.97 GB

Ended at Jun 15, 2023 6:56:50 PM.

----- Time-Dependent Solver 1 in Study 1 (CV 1 to 39)/Solution 1 (sol2) ----->

### Advanced (aDef)

#### ASSEMBLY SETTINGS

| Description            | Value |
|------------------------|-------|
| Reuse sparsity pattern | On    |

### Fully Coupled 1 (fc1)

#### GENERAL

| Description   | Value                    |
|---------------|--------------------------|
| Linear solver | <a href="#">Direct 1</a> |

#### METHOD AND TERMINATION

| Description                    | Value                 |
|--------------------------------|-----------------------|
| Damping factor                 | 0.9                   |
| Jacobian update                | Once per time step    |
| Maximum number of iterations   | 8                     |
| Stabilization and acceleration | Anderson acceleration |
| Dimension of iteration space   | 5                     |



## Automatic Remeshing 1 (ar1)

### GENERAL

| Description        | Value                      |
|--------------------|----------------------------|
| Remesh in geometry | <a href="#">Geometry 1</a> |

### CONDITION FOR REMESHING

| Description    | Value      |
|----------------|------------|
| Condition type | Distortion |

### OUTPUT

| Description | Value                                                            |
|-------------|------------------------------------------------------------------|
| Solution    | <a href="#">Remeshed Solution 1</a>                              |
| Meshes      | {mesh2, mesh3, mesh4, mesh5, mesh6, mesh7, mesh8, mesh9, mesh10} |

## 4 Study 2 (CV 40 to 44)

### COMPUTATION INFORMATION

|                  |           |
|------------------|-----------|
| Computation time | 9 min 5 s |
|------------------|-----------|

### 4.1 TIME DEPENDENT

| Times                               | Unit |
|-------------------------------------|------|
| range(39*t_cv,t_tot/nb/200,44*t_cv) | s    |

### STUDY SETTINGS

| Description                    | Value |
|--------------------------------|-------|
| Include geometric nonlinearity | Off   |

### STUDY SETTINGS

| Description  | Value                                                                                                                                                                                                                                                                                                                                                                                                                                                                                                                                                                                                                                                                                                                                                                                                                                                                                                                                                                                                                                                                                                                                                                                                                                                                                                                                                                                                                                                                                                                                                                                                                                                                                                                                                                                                                                                                                                                                |
|--------------|--------------------------------------------------------------------------------------------------------------------------------------------------------------------------------------------------------------------------------------------------------------------------------------------------------------------------------------------------------------------------------------------------------------------------------------------------------------------------------------------------------------------------------------------------------------------------------------------------------------------------------------------------------------------------------------------------------------------------------------------------------------------------------------------------------------------------------------------------------------------------------------------------------------------------------------------------------------------------------------------------------------------------------------------------------------------------------------------------------------------------------------------------------------------------------------------------------------------------------------------------------------------------------------------------------------------------------------------------------------------------------------------------------------------------------------------------------------------------------------------------------------------------------------------------------------------------------------------------------------------------------------------------------------------------------------------------------------------------------------------------------------------------------------------------------------------------------------------------------------------------------------------------------------------------------------|
| Output times | {214.50000000000003, 214.52750000000003, 214.55500000000004, 214.58250000000004, 214.61000000000004, 214.63750000000002, 214.66500000000002, 214.69250000000002, 214.72000000000003, 214.74750000000003, 214.77500000000003, 214.80250000000004, 214.83000000000004, 214.85750000000002, 214.88500000000002, 214.91250000000002, 214.94000000000003, 214.96750000000003, 214.99500000000003, 215.02250000000004, 215.05000000000004, 215.07750000000001, 215.10500000000002, 215.13250000000002, 215.16000000000003, 215.18750000000003, 215.21500000000003, 215.24250000000004, 215.27000000000004, 215.29750000000004, 215.32500000000002, 215.35250000000002, 215.38000000000002, 215.40750000000003, 215.43500000000003, 215.46250000000003, 215.49000000000004, 215.51750000000004, 215.54500000000002, 215.57250000000002, 215.60000000000002, 215.62750000000003, 215.65500000000003, 215.68250000000003, 215.71000000000004, 215.73750000000004, 215.76500000000001, 215.79250000000002, 215.82000000000002, 215.84750000000003, 215.87500000000003, 215.90250000000003, 215.93000000000004, 215.95750000000004, 215.98500000000004, 216.01250000000002, 216.04000000000002, 216.06750000000002, 216.09500000000003, 216.12250000000003, 216.15000000000003, 216.17750000000004, 216.20500000000004, 216.23250000000002, 216.26000000000002, 216.28750000000002, 216.31500000000003, 216.34250000000003, 216.37000000000003, 216.39750000000004, 216.42500000000004, 216.45250000000001, 216.48000000000002, 216.50750000000002, 216.53500000000003, 216.56250000000003, 216.59000000000003, 216.61750000000004, 216.64500000000004, 216.67250000000004, 216.70000000000002, 216.72750000000002, 216.75500000000002, 216.78250000000003, 216.81000000000003, 216.83750000000003, 216.86500000000004, 216.89250000000004, 216.92000000000002, 216.94750000000002, 216.97500000000002, 217.00250000000003, 217.03000000000003} |

| Description | Value                                                                                                                                                                                                                                                                                                                                                                                                                                                                                                                                                                                                                                                                                                                                                                                                                                                                                                                                                                                                                                                                                                                                                                                                                                                                                                                                                                                                                                                                                                                                                                                                                                                                                                                                                                                                                                                                                                                                                                                                                                                                                                                                                                                                                                                                                                                                                                                                                                                                                                                                                                                                                                                                                                                                                                                                                                                                                                                                                                                           |
|-------------|-------------------------------------------------------------------------------------------------------------------------------------------------------------------------------------------------------------------------------------------------------------------------------------------------------------------------------------------------------------------------------------------------------------------------------------------------------------------------------------------------------------------------------------------------------------------------------------------------------------------------------------------------------------------------------------------------------------------------------------------------------------------------------------------------------------------------------------------------------------------------------------------------------------------------------------------------------------------------------------------------------------------------------------------------------------------------------------------------------------------------------------------------------------------------------------------------------------------------------------------------------------------------------------------------------------------------------------------------------------------------------------------------------------------------------------------------------------------------------------------------------------------------------------------------------------------------------------------------------------------------------------------------------------------------------------------------------------------------------------------------------------------------------------------------------------------------------------------------------------------------------------------------------------------------------------------------------------------------------------------------------------------------------------------------------------------------------------------------------------------------------------------------------------------------------------------------------------------------------------------------------------------------------------------------------------------------------------------------------------------------------------------------------------------------------------------------------------------------------------------------------------------------------------------------------------------------------------------------------------------------------------------------------------------------------------------------------------------------------------------------------------------------------------------------------------------------------------------------------------------------------------------------------------------------------------------------------------------------------------------------|
|             | 217.05750000000003, 217.08500000000004, 217.11250000000004, 217.14000000000004, 217.16750000000002, 217.19500000000002, 217.22250000000003, 217.25000000000003, 217.27750000000003, 217.30500000000004, 217.33250000000004, 217.36000000000004, 217.38750000000002, 217.41500000000002, 217.44250000000002, 217.47000000000003, 217.49750000000003, 217.52500000000003, 217.55250000000004, 217.58000000000004, 217.60750000000002, 217.63500000000002, 217.66250000000002, 217.69000000000003, 217.71750000000003, 217.74500000000003, 217.77250000000004, 217.80000000000004, 217.82750000000004, 217.85500000000002, 217.88250000000002, 217.91000000000003, 217.93750000000003, 217.96500000000003, 217.99250000000004, 218.02000000000004, 218.04750000000004, 218.07500000000002, 218.10250000000002, 218.13000000000002, 218.15750000000003, 218.18500000000003, 218.21250000000003, 218.24000000000004, 218.26750000000004, 218.29500000000002, 218.32250000000002, 218.35000000000002, 218.37750000000003, 218.40500000000003, 218.43250000000003, 218.46000000000004, 218.48750000000004, 218.51500000000004, 218.54250000000002, 218.57000000000002, 218.59750000000003, 218.62500000000003, 218.65250000000003, 218.68000000000004, 218.70750000000004, 218.73500000000004, 218.76250000000002, 218.79000000000002, 218.81750000000002, 218.84500000000003, 218.87250000000003, 218.90000000000003, 218.92750000000004, 218.95500000000004, 218.98250000000002, 219.01000000000002, 219.03750000000002, 219.06500000000003, 219.09250000000003, 219.12000000000003, 219.14750000000004, 219.17500000000004, 219.20250000000004, 219.23000000000002, 219.25750000000002, 219.28500000000003, 219.31250000000003, 219.34000000000003, 219.36750000000004, 219.39500000000004, 219.42250000000004, 219.45000000000002, 219.47750000000002, 219.50500000000002, 219.53250000000003, 219.56000000000003, 219.58750000000003, 219.61500000000004, 219.64250000000004, 219.67000000000002, 219.69750000000002, 219.72500000000002, 219.75250000000003, 219.78000000000003, 219.80750000000003, 219.83500000000004, 219.86250000000004, 219.89000000000004, 219.91750000000002, 219.94500000000002, 219.97250000000003, 220.00000000000003, 220.02750000000003, 220.05500000000004, 220.08250000000004, 220.11000000000004, 220.13750000000002, 220.16500000000002, 220.19250000000002, 220.22000000000003, 220.24750000000003, 220.27500000000003, 220.30250000000004, 220.33000000000004, 220.35750000000002, 220.38500000000002, 220.41250000000002, 220.44000000000003, 220.46750000000003, 220.49500000000003, 220.52250000000004, 220.55000000000004, 220.57750000000004, 220.60500000000002, 220.63250000000002, 220.66000000000003, 220.68750000000003, 220.71500000000003, 220.74250000000004, 220.77000000000004, 220.79750000000004, 220.82500000000002, 220.85250000000002, 220.88000000000002, 220.90750000000003, 220.93500000000003, 220.96250000000003, 220.99000000000004, |

| Description | Value                                                                                                                                                                                                                                                                                                                                                                                                                                                                                                                                                                                                                                                                                                                                                                                                                                                                                                                                                                                                                                                                                                                                                                                                                                                                                                                                                                                                                                                                                                                                                                                                                                                                                                                                                                                                                                                                                                                                                                                                                                                                                                                                                                                                                                                                                                                                                                                                                                                                                                                                                                                                                                                                                                                                                                                                                                                                                                                                                                                                                                                                                                                                        |
|-------------|----------------------------------------------------------------------------------------------------------------------------------------------------------------------------------------------------------------------------------------------------------------------------------------------------------------------------------------------------------------------------------------------------------------------------------------------------------------------------------------------------------------------------------------------------------------------------------------------------------------------------------------------------------------------------------------------------------------------------------------------------------------------------------------------------------------------------------------------------------------------------------------------------------------------------------------------------------------------------------------------------------------------------------------------------------------------------------------------------------------------------------------------------------------------------------------------------------------------------------------------------------------------------------------------------------------------------------------------------------------------------------------------------------------------------------------------------------------------------------------------------------------------------------------------------------------------------------------------------------------------------------------------------------------------------------------------------------------------------------------------------------------------------------------------------------------------------------------------------------------------------------------------------------------------------------------------------------------------------------------------------------------------------------------------------------------------------------------------------------------------------------------------------------------------------------------------------------------------------------------------------------------------------------------------------------------------------------------------------------------------------------------------------------------------------------------------------------------------------------------------------------------------------------------------------------------------------------------------------------------------------------------------------------------------------------------------------------------------------------------------------------------------------------------------------------------------------------------------------------------------------------------------------------------------------------------------------------------------------------------------------------------------------------------------------------------------------------------------------------------------------------------------|
|             | 221.01750000000004, 221.04500000000002, 221.07250000000002,<br>221.10000000000002, 221.12750000000003, 221.15500000000003,<br>221.18250000000003, 221.21000000000004, 221.23750000000004,<br>221.26500000000004, 221.29250000000002, 221.32000000000002,<br>221.34750000000003, 221.37500000000003, 221.40250000000003,<br>221.43000000000004, 221.45750000000004, 221.48500000000004,<br>221.51250000000002, 221.54000000000002, 221.56750000000002,<br>221.59500000000003, 221.62250000000003, 221.65000000000003,<br>221.67750000000004, 221.70500000000004, 221.73250000000002,<br>221.76000000000002, 221.78750000000002, 221.81500000000003,<br>221.84250000000003, 221.87000000000003, 221.89750000000004,<br>221.92500000000004, 221.95250000000004, 221.98000000000002,<br>222.00750000000002, 222.03500000000003, 222.06250000000003,<br>222.09000000000003, 222.11750000000004, 222.14500000000004,<br>222.17250000000004, 222.20000000000002, 222.22750000000002,<br>222.25500000000002, 222.28250000000003, 222.31000000000003,<br>222.33750000000003, 222.36500000000004, 222.39250000000004,<br>222.42000000000002, 222.44750000000002, 222.47500000000002,<br>222.50250000000003, 222.53000000000003, 222.55750000000003,<br>222.58500000000004, 222.61250000000004, 222.64000000000004,<br>222.66750000000002, 222.69500000000002, 222.72250000000003,<br>222.75000000000003, 222.77750000000003, 222.80500000000004,<br>222.83250000000004, 222.86000000000004, 222.88750000000002,<br>222.91500000000002, 222.94250000000002, 222.97000000000003,<br>222.99750000000003, 223.02500000000003, 223.05250000000004,<br>223.08000000000004, 223.10750000000002, 223.13500000000002,<br>223.16250000000002, 223.19000000000003, 223.21750000000003,<br>223.24500000000003, 223.27250000000004, 223.30000000000004,<br>223.32750000000004, 223.35500000000002, 223.38250000000002,<br>223.41000000000003, 223.43750000000003, 223.46500000000003,<br>223.49250000000004, 223.52000000000004, 223.54750000000004,<br>223.57500000000002, 223.60250000000002, 223.63000000000002,<br>223.65750000000003, 223.68500000000003, 223.71250000000003,<br>223.74000000000004, 223.76750000000004, 223.79500000000002,<br>223.82250000000002, 223.85000000000002, 223.87750000000003,<br>223.90500000000003, 223.93250000000003, 223.96000000000004,<br>223.98750000000004, 224.01500000000004, 224.04250000000002,<br>224.07000000000002, 224.09750000000003, 224.12500000000003,<br>224.15250000000003, 224.18000000000004, 224.20750000000004,<br>224.23500000000004, 224.26250000000002, 224.29000000000002,<br>224.31750000000002, 224.34500000000003, 224.37250000000003,<br>224.40000000000003, 224.42750000000004, 224.45500000000004,<br>224.48250000000002, 224.51000000000002, 224.53750000000002,<br>224.56500000000003, 224.59250000000003, 224.62000000000003,<br>224.64750000000004, 224.67500000000004, 224.70250000000004,<br>224.73000000000002, 224.75750000000002, 224.78500000000003,<br>224.81250000000003, 224.84000000000003, 224.86750000000004,<br>224.89500000000004, 224.92250000000004, 224.95000000000002, |

| Description | Value                                                                                                                                                                                                                                                                                                                                                                                                                                                                                                                                                                                                                                                                                                                                                                                                                                                                                                                                                                                                                                                                                                                                                                                                                                                                                                                                                                                                                                                                                                                                                                                                                                                                                                                                                                                                                                                                                                                                                                                                                                                                                                                                                                                                                                                                                                                                                                                                                                                                                                                                                                                                                                                                                                                                                                                                                                                                                                                                                                                           |
|-------------|-------------------------------------------------------------------------------------------------------------------------------------------------------------------------------------------------------------------------------------------------------------------------------------------------------------------------------------------------------------------------------------------------------------------------------------------------------------------------------------------------------------------------------------------------------------------------------------------------------------------------------------------------------------------------------------------------------------------------------------------------------------------------------------------------------------------------------------------------------------------------------------------------------------------------------------------------------------------------------------------------------------------------------------------------------------------------------------------------------------------------------------------------------------------------------------------------------------------------------------------------------------------------------------------------------------------------------------------------------------------------------------------------------------------------------------------------------------------------------------------------------------------------------------------------------------------------------------------------------------------------------------------------------------------------------------------------------------------------------------------------------------------------------------------------------------------------------------------------------------------------------------------------------------------------------------------------------------------------------------------------------------------------------------------------------------------------------------------------------------------------------------------------------------------------------------------------------------------------------------------------------------------------------------------------------------------------------------------------------------------------------------------------------------------------------------------------------------------------------------------------------------------------------------------------------------------------------------------------------------------------------------------------------------------------------------------------------------------------------------------------------------------------------------------------------------------------------------------------------------------------------------------------------------------------------------------------------------------------------------------------|
|             | 224.97750000000002, 225.00500000000002, 225.03250000000003, 225.06000000000003, 225.08750000000003, 225.11500000000004, 225.14250000000004, 225.17000000000002, 225.19750000000002, 225.22500000000002, 225.25250000000003, 225.28000000000003, 225.30750000000003, 225.33500000000004, 225.36250000000004, 225.39000000000004, 225.41750000000002, 225.44500000000002, 225.47250000000003, 225.50000000000003, 225.52750000000003, 225.55500000000004, 225.58250000000004, 225.61000000000004, 225.63750000000002, 225.66500000000002, 225.69250000000002, 225.72000000000003, 225.74750000000003, 225.77500000000003, 225.80250000000004, 225.83000000000004, 225.85750000000002, 225.88500000000002, 225.91250000000002, 225.94000000000003, 225.96750000000003, 225.99500000000003, 226.02250000000004, 226.05000000000004, 226.07750000000004, 226.10500000000002, 226.13250000000002, 226.16000000000003, 226.18750000000003, 226.21500000000003, 226.24250000000004, 226.27000000000004, 226.29750000000004, 226.32500000000002, 226.35250000000002, 226.38000000000002, 226.40750000000003, 226.43500000000003, 226.46250000000003, 226.49000000000004, 226.51750000000004, 226.54500000000002, 226.57250000000002, 226.60000000000002, 226.62750000000003, 226.65500000000003, 226.68250000000003, 226.71000000000004, 226.73750000000004, 226.76500000000004, 226.79250000000002, 226.82000000000002, 226.84750000000003, 226.87500000000003, 226.90250000000003, 226.93000000000004, 226.95750000000004, 226.98500000000004, 227.01250000000002, 227.04000000000002, 227.06750000000002, 227.09500000000003, 227.12250000000003, 227.15000000000003, 227.17750000000004, 227.20500000000004, 227.23250000000002, 227.26000000000002, 227.28750000000002, 227.31500000000003, 227.34250000000003, 227.37000000000003, 227.39750000000004, 227.42500000000004, 227.45250000000004, 227.48000000000002, 227.50750000000002, 227.53500000000003, 227.56250000000003, 227.59000000000003, 227.61750000000004, 227.64500000000004, 227.67250000000004, 227.70000000000002, 227.72750000000002, 227.75500000000002, 227.78250000000003, 227.81000000000003, 227.83750000000003, 227.86500000000004, 227.89250000000004, 227.92000000000002, 227.94750000000002, 227.97500000000002, 228.00250000000003, 228.03000000000003, 228.05750000000003, 228.08500000000004, 228.11250000000004, 228.14000000000004, 228.16750000000002, 228.19500000000002, 228.22250000000003, 228.25000000000003, 228.27750000000003, 228.30500000000004, 228.33250000000004, 228.36000000000004, 228.38750000000002, 228.41500000000002, 228.44250000000002, 228.47000000000003, 228.49750000000003, 228.52500000000003, 228.55250000000004, 228.58000000000004, 228.60750000000002, 228.63500000000002, 228.66250000000002, 228.69000000000003, 228.71750000000003, 228.74500000000003, 228.77250000000004, 228.80000000000004, 228.82750000000004, 228.85500000000002, 228.88250000000002, 228.91000000000003, |

| Description | Value                                                                                                                                                                                                                                                                                                                                                                                                                                                                                                                                                                                                                                                                                                                                                                                                                                                                                                                                                                                                                                                                                                                                                                                                                                                                                                                                                                                                                                                                                                                                                                                                                                                                                                                                                                                                                                                                                                                                                                                                                                                                                                                                                                                                                                                                                                                                                                                                                                                                                                                                                                                                                                                                                                                                                                                                                                                                                                                                                                                           |
|-------------|-------------------------------------------------------------------------------------------------------------------------------------------------------------------------------------------------------------------------------------------------------------------------------------------------------------------------------------------------------------------------------------------------------------------------------------------------------------------------------------------------------------------------------------------------------------------------------------------------------------------------------------------------------------------------------------------------------------------------------------------------------------------------------------------------------------------------------------------------------------------------------------------------------------------------------------------------------------------------------------------------------------------------------------------------------------------------------------------------------------------------------------------------------------------------------------------------------------------------------------------------------------------------------------------------------------------------------------------------------------------------------------------------------------------------------------------------------------------------------------------------------------------------------------------------------------------------------------------------------------------------------------------------------------------------------------------------------------------------------------------------------------------------------------------------------------------------------------------------------------------------------------------------------------------------------------------------------------------------------------------------------------------------------------------------------------------------------------------------------------------------------------------------------------------------------------------------------------------------------------------------------------------------------------------------------------------------------------------------------------------------------------------------------------------------------------------------------------------------------------------------------------------------------------------------------------------------------------------------------------------------------------------------------------------------------------------------------------------------------------------------------------------------------------------------------------------------------------------------------------------------------------------------------------------------------------------------------------------------------------------------|
|             | 228.93750000000003, 228.96500000000003, 228.99250000000004, 229.02000000000004, 229.04750000000004, 229.07500000000002, 229.10250000000002, 229.13000000000002, 229.15750000000003, 229.18500000000003, 229.21250000000003, 229.24000000000004, 229.26750000000004, 229.29500000000002, 229.32250000000002, 229.35000000000002, 229.37750000000003, 229.40500000000003, 229.43250000000003, 229.46000000000004, 229.48750000000004, 229.51500000000004, 229.54250000000002, 229.57000000000002, 229.59750000000003, 229.62500000000003, 229.65250000000003, 229.68000000000004, 229.70750000000004, 229.73500000000004, 229.76250000000005, 229.79000000000002, 229.81750000000002, 229.84500000000003, 229.87250000000003, 229.90000000000003, 229.92750000000004, 229.95500000000004, 229.98250000000002, 230.01000000000002, 230.03750000000002, 230.06500000000003, 230.09250000000003, 230.12000000000003, 230.14750000000004, 230.17500000000004, 230.20250000000004, 230.23000000000002, 230.25750000000002, 230.28500000000003, 230.31250000000003, 230.34000000000003, 230.36750000000004, 230.39500000000004, 230.42250000000004, 230.45000000000005, 230.47750000000002, 230.50500000000002, 230.53250000000003, 230.56000000000003, 230.58750000000003, 230.61500000000004, 230.64250000000004, 230.67000000000002, 230.69750000000002, 230.72500000000002, 230.75250000000003, 230.78000000000003, 230.80750000000003, 230.83500000000004, 230.86250000000004, 230.89000000000004, 230.91750000000002, 230.94500000000002, 230.97250000000003, 231.00000000000003, 231.02750000000003, 231.05500000000004, 231.08250000000004, 231.11000000000004, 231.13750000000005, 231.16500000000002, 231.19250000000002, 231.22000000000003, 231.24750000000003, 231.27500000000003, 231.30250000000004, 231.33000000000004, 231.35750000000002, 231.38500000000002, 231.41250000000002, 231.44000000000003, 231.46750000000003, 231.49500000000003, 231.52250000000004, 231.55000000000004, 231.57750000000004, 231.60500000000002, 231.63250000000002, 231.66000000000003, 231.68750000000003, 231.71500000000003, 231.74250000000004, 231.77000000000004, 231.79750000000004, 231.82500000000005, 231.85250000000002, 231.88000000000002, 231.90750000000003, 231.93500000000003, 231.96250000000003, 231.99000000000004, 232.01750000000004, 232.04500000000002, 232.07250000000002, 232.10000000000002, 232.12750000000003, 232.15500000000003, 232.18250000000003, 232.21000000000004, 232.23750000000004, 232.26500000000004, 232.29250000000002, 232.32000000000002, 232.34750000000003, 232.37500000000003, 232.40250000000003, 232.43000000000004, 232.45750000000004, 232.48500000000004, 232.51250000000005, 232.54000000000002, 232.56750000000002, 232.59500000000003, 232.62250000000003, 232.65000000000003, 232.67750000000004, 232.70500000000004, 232.73250000000002, 232.76000000000002, 232.78750000000002, 232.81500000000003, 232.84250000000003, 232.87000000000003, |

| Description | Value                                                                                                                                                                                                                                                                                                                                                                                                                                                                                                                                                                                                                                                                                                                                                                                                                                                                                                                                                                                                                                                                                                                                                                                                                                                                                                                                                                                                                                                                                                                                                                                                                                                                                                                                                                                                                                                                                                                                                                                                                                                                                                                                                                                                                                                                                                                                                                                                                                                                                                                                                                                                                                                                                                                                                                                                                                                                                                                                                                                           |
|-------------|-------------------------------------------------------------------------------------------------------------------------------------------------------------------------------------------------------------------------------------------------------------------------------------------------------------------------------------------------------------------------------------------------------------------------------------------------------------------------------------------------------------------------------------------------------------------------------------------------------------------------------------------------------------------------------------------------------------------------------------------------------------------------------------------------------------------------------------------------------------------------------------------------------------------------------------------------------------------------------------------------------------------------------------------------------------------------------------------------------------------------------------------------------------------------------------------------------------------------------------------------------------------------------------------------------------------------------------------------------------------------------------------------------------------------------------------------------------------------------------------------------------------------------------------------------------------------------------------------------------------------------------------------------------------------------------------------------------------------------------------------------------------------------------------------------------------------------------------------------------------------------------------------------------------------------------------------------------------------------------------------------------------------------------------------------------------------------------------------------------------------------------------------------------------------------------------------------------------------------------------------------------------------------------------------------------------------------------------------------------------------------------------------------------------------------------------------------------------------------------------------------------------------------------------------------------------------------------------------------------------------------------------------------------------------------------------------------------------------------------------------------------------------------------------------------------------------------------------------------------------------------------------------------------------------------------------------------------------------------------------------|
|             | 232.89750000000004, 232.92500000000004, 232.95250000000004, 232.98000000000002, 233.00750000000002, 233.03500000000003, 233.06250000000003, 233.09000000000003, 233.11750000000004, 233.14500000000004, 233.17250000000004, 233.20000000000005, 233.22750000000002, 233.25500000000002, 233.28250000000003, 233.31000000000003, 233.33750000000003, 233.36500000000004, 233.39250000000004, 233.42000000000002, 233.44750000000002, 233.47500000000002, 233.50250000000003, 233.53000000000003, 233.55750000000003, 233.58500000000004, 233.61250000000004, 233.64000000000004, 233.66750000000002, 233.69500000000002, 233.72250000000003, 233.75000000000003, 233.77750000000003, 233.80500000000004, 233.83250000000004, 233.86000000000004, 233.88750000000005, 233.91500000000002, 233.94250000000002, 233.97000000000003, 233.99750000000003, 234.02500000000003, 234.05250000000004, 234.08000000000004, 234.10750000000002, 234.13500000000002, 234.16250000000002, 234.19000000000003, 234.21750000000003, 234.24500000000003, 234.27250000000004, 234.30000000000004, 234.32750000000004, 234.35500000000002, 234.38250000000002, 234.41000000000003, 234.43750000000003, 234.46500000000003, 234.49250000000004, 234.52000000000004, 234.54750000000004, 234.57500000000005, 234.60250000000002, 234.63000000000002, 234.65750000000003, 234.68500000000003, 234.71250000000003, 234.74000000000004, 234.76750000000004, 234.79500000000002, 234.82250000000002, 234.85000000000002, 234.87750000000003, 234.90500000000003, 234.93250000000003, 234.96000000000004, 234.98750000000004, 235.01500000000004, 235.04250000000002, 235.07000000000002, 235.09750000000003, 235.12500000000003, 235.15250000000003, 235.18000000000004, 235.20750000000004, 235.23500000000004, 235.26250000000005, 235.29000000000002, 235.31750000000002, 235.34500000000003, 235.37250000000003, 235.40000000000003, 235.42750000000004, 235.45500000000004, 235.48250000000002, 235.51000000000002, 235.53750000000002, 235.56500000000003, 235.59250000000003, 235.62000000000003, 235.64750000000004, 235.67500000000004, 235.70250000000004, 235.73000000000002, 235.75750000000002, 235.78500000000003, 235.81250000000003, 235.84000000000003, 235.86750000000004, 235.89500000000004, 235.92250000000004, 235.95000000000005, 235.97750000000002, 236.00500000000002, 236.03250000000003, 236.06000000000003, 236.08750000000003, 236.11500000000004, 236.14250000000004, 236.17000000000002, 236.19750000000002, 236.22500000000002, 236.25250000000003, 236.28000000000003, 236.30750000000003, 236.33500000000004, 236.36250000000004, 236.39000000000004, 236.41750000000002, 236.44500000000002, 236.47250000000003, 236.50000000000003, 236.52750000000003, 236.55500000000004, 236.58250000000004, 236.61000000000004, 236.63750000000005, 236.66500000000002, 236.69250000000002, 236.72000000000003, 236.74750000000003, 236.77500000000003, 236.80250000000004, 236.83000000000004, |

| Description | Value                                                                                                                                                                                                                                                                                                                                                                                                                                                                                                                                                                                                                                                                                                                                                                                                                                                                                                                                                                                                                                                                                                                                                                                                                                                                                                                                                                                                                                                                                                                                                                                                                                                                                                                                                                                                                                                                                                                                                                                                                                                                                                                                                                                                                                                                                                                                                                                                                                                                                                                                                                                                                                                                                                                                                                                                                                                                                                                                                                                           |
|-------------|-------------------------------------------------------------------------------------------------------------------------------------------------------------------------------------------------------------------------------------------------------------------------------------------------------------------------------------------------------------------------------------------------------------------------------------------------------------------------------------------------------------------------------------------------------------------------------------------------------------------------------------------------------------------------------------------------------------------------------------------------------------------------------------------------------------------------------------------------------------------------------------------------------------------------------------------------------------------------------------------------------------------------------------------------------------------------------------------------------------------------------------------------------------------------------------------------------------------------------------------------------------------------------------------------------------------------------------------------------------------------------------------------------------------------------------------------------------------------------------------------------------------------------------------------------------------------------------------------------------------------------------------------------------------------------------------------------------------------------------------------------------------------------------------------------------------------------------------------------------------------------------------------------------------------------------------------------------------------------------------------------------------------------------------------------------------------------------------------------------------------------------------------------------------------------------------------------------------------------------------------------------------------------------------------------------------------------------------------------------------------------------------------------------------------------------------------------------------------------------------------------------------------------------------------------------------------------------------------------------------------------------------------------------------------------------------------------------------------------------------------------------------------------------------------------------------------------------------------------------------------------------------------------------------------------------------------------------------------------------------------|
|             | 236.85750000000002, 236.88500000000002, 236.91250000000002, 236.94000000000003, 236.96750000000003, 236.99500000000003, 237.02250000000004, 237.05000000000004, 237.07750000000004, 237.10500000000002, 237.13250000000002, 237.16000000000003, 237.18750000000003, 237.21500000000003, 237.24250000000004, 237.27000000000004, 237.29750000000004, 237.32500000000005, 237.35250000000002, 237.38000000000002, 237.40750000000003, 237.43500000000003, 237.46250000000003, 237.49000000000004, 237.51750000000004, 237.54500000000002, 237.57250000000002, 237.60000000000002, 237.62750000000003, 237.65500000000003, 237.68250000000003, 237.71000000000004, 237.73750000000004, 237.76500000000004, 237.79250000000002, 237.82000000000002, 237.84750000000003, 237.87500000000003, 237.90250000000003, 237.93000000000004, 237.95750000000004, 237.98500000000004, 238.01250000000005, 238.04000000000002, 238.06750000000002, 238.09500000000003, 238.12250000000003, 238.15000000000003, 238.17750000000004, 238.20500000000004, 238.23250000000002, 238.26000000000002, 238.28750000000002, 238.31500000000003, 238.34250000000003, 238.37000000000003, 238.39750000000004, 238.42500000000004, 238.45250000000004, 238.48000000000002, 238.50750000000002, 238.53500000000003, 238.56250000000003, 238.59000000000003, 238.61750000000004, 238.64500000000004, 238.67250000000004, 238.70000000000005, 238.72750000000002, 238.75500000000002, 238.78250000000003, 238.81000000000003, 238.83750000000003, 238.86500000000004, 238.89250000000004, 238.92000000000002, 238.94750000000002, 238.97500000000002, 239.00250000000003, 239.03000000000003, 239.05750000000003, 239.08500000000004, 239.11250000000004, 239.14000000000004, 239.16750000000002, 239.19500000000002, 239.22250000000003, 239.25000000000003, 239.27750000000003, 239.30500000000004, 239.33250000000004, 239.36000000000004, 239.38750000000005, 239.41500000000002, 239.44250000000002, 239.47000000000003, 239.49750000000003, 239.52500000000003, 239.55250000000004, 239.58000000000004, 239.60750000000002, 239.63500000000002, 239.66250000000002, 239.69000000000003, 239.71750000000003, 239.74500000000003, 239.77250000000004, 239.80000000000004, 239.82750000000004, 239.85500000000002, 239.88250000000002, 239.91000000000003, 239.93750000000003, 239.96500000000003, 239.99250000000004, 240.02000000000004, 240.04750000000004, 240.07500000000005, 240.10250000000002, 240.13000000000002, 240.15750000000003, 240.18500000000003, 240.21250000000003, 240.24000000000004, 240.26750000000004, 240.29500000000002, 240.32250000000005, 240.35000000000002, 240.37750000000003, 240.40500000000003, 240.43250000000003, 240.46000000000004, 240.48750000000004, 240.51500000000004, 240.54250000000002, 240.57000000000002, 240.59750000000003, 240.62500000000003, 240.65250000000003, 240.68000000000004, 240.70750000000004, 240.73500000000004, 240.76250000000005, 240.79000000000002, |



| Description | Value                                                                                                                                                                                                                                                                                                                                                                                                                                                                                                                                                                                                                                                                                                                                                                                                                                                                                                                                                     |
|-------------|-----------------------------------------------------------------------------------------------------------------------------------------------------------------------------------------------------------------------------------------------------------------------------------------------------------------------------------------------------------------------------------------------------------------------------------------------------------------------------------------------------------------------------------------------------------------------------------------------------------------------------------------------------------------------------------------------------------------------------------------------------------------------------------------------------------------------------------------------------------------------------------------------------------------------------------------------------------|
|             | 240.81750000000002, 240.84500000000003, 240.87250000000003,<br>240.90000000000003, 240.92750000000004, 240.95500000000004,<br>240.98250000000002, 241.01000000000005, 241.03750000000002,<br>241.06500000000003, 241.09250000000003, 241.12000000000003,<br>241.14750000000004, 241.17500000000004, 241.20250000000004,<br>241.23000000000002, 241.25750000000002, 241.28500000000003,<br>241.31250000000003, 241.34000000000003, 241.36750000000004,<br>241.39500000000004, 241.42250000000004, 241.45000000000005,<br>241.47750000000002, 241.50500000000002, 241.53250000000003,<br>241.56000000000003, 241.58750000000003, 241.61500000000004,<br>241.64250000000004, 241.67000000000004, 241.69750000000005,<br>241.72500000000002, 241.75250000000003, 241.78000000000003,<br>241.80750000000003, 241.83500000000004, 241.86250000000004,<br>241.89000000000004, 241.91750000000002, 241.94500000000002,<br>241.97250000000003, 242.00000000000003} |

## MESH

| Feature    | Value  |
|------------|--------|
| Geometry 1 | mesh10 |

## PHYSICS AND VARIABLES SELECTION

| Physics interface                             | Discretization |
|-----------------------------------------------|----------------|
| Transport of Diluted Species in droplet (tds) | physics        |
| Moving Mesh (ale)                             | physics        |

## MESH SELECTION

| Geometry           | Mesh   |
|--------------------|--------|
| Geometry 1 (geom1) | mesh10 |

## 4.2 SOLVER CONFIGURATIONS

### 4.2.1 Solution 4

#### Compile Equations: Time Dependent (st1)

##### STUDY AND STEP

| Description    | Value                                 |
|----------------|---------------------------------------|
| Use study      | <a href="#">Study 2 (CV 40 to 44)</a> |
| Use study step | <a href="#">Time Dependent</a>        |

##### LOG

```

<---- Compile Equations: Time Dependent in Study 2 (CV 40 to 44)/Solution 4
(sol4) -----
Started at Jun 21, 2023 12:18:29 PM.
Geometry shape function: Linear Lagrange
Running on Intel64 Family 6 Model 158 Stepping 10, GenuineIntel.
Using 1 socket with 6 cores in total on LAPTOP-2492RD8I.
Available memory: 32.27 GB.
Time: 1 s.
Physical memory: 2.37 GB
Virtual memory: 2.6 GB
Ended at Jun 21, 2023 12:18:30 PM.
----- Compile Equations: Time Dependent in Study 2 (CV 40 to 44)/Solution 4
(sol4) ----->

```

## Dependent Variables 1 (v1)

### INITIAL VALUES OF VARIABLES SOLVED FOR

| Description | Value                               |
|-------------|-------------------------------------|
| Method      | Solution                            |
| Solution    | <a href="#">Remeshed Solution 1</a> |

### RESIDUAL SCALING

| Description | Value  |
|-------------|--------|
| Method      | Manual |

### VALUES OF VARIABLES NOT SOLVED FOR

| Description | Value                               |
|-------------|-------------------------------------|
| Method      | Solution                            |
| Solution    | <a href="#">Remeshed Solution 1</a> |

### INITIAL VALUE CALCULATION CONSTANTS

| Constant name | Initial value source                |
|---------------|-------------------------------------|
| t             | range(39*t_cv,t_tot/nb/200,44*t_cv) |
| timestep      | 0.0275[s]                           |

### LOG

```

<---- Dependent Variables 1 in Study 2 (CV 40 to 44)/Solution 4 (sol4) -----
Started at Jun 21, 2023 12:18:30 PM.
Initial values of variables solved for: Remeshed Solution 1 (sol3), t=214.5 s [Last]
.
Values of variables not solved for: Remeshed Solution 1 (sol3), t=214.5 s [Last].
Solution time: 0 s.
Physical memory: 2.37 GB
Virtual memory: 2.6 GB
Ended at Jun 21, 2023 12:18:30 PM.
----- Dependent Variables 1 in Study 2 (CV 40 to 44)/Solution 4 (sol4) ----->

```

### Concentration (comp1.cOx) (comp1\_cOx)

#### GENERAL

| Description        | Value                                                    |
|--------------------|----------------------------------------------------------|
| Field components   | comp1.cOx                                                |
| Internal variables | {comp1.uflux.cOx, comp1.dflux.cOx, comp1.tds.dt2Inv_cOx} |

### Concentration (comp1.cRed) (comp1\_cRed)

#### GENERAL

| Description        | Value                                                       |
|--------------------|-------------------------------------------------------------|
| Field components   | comp1.cRed                                                  |
| Internal variables | {comp1.uflux.cRed, comp1.dflux.cRed, comp1.tds.dt2Inv_cRed} |

### Spatial mesh displacement (comp1.spatial.disp) (comp1\_spatial\_disp)

#### GENERAL

| Description      | Value                              |
|------------------|------------------------------------|
| Field components | {comp1.spatial.u, comp1.spatial.w} |

#### SCALING

| Description | Value                |
|-------------|----------------------|
| Method      | Manual               |
| Scale       | 2.353429412580713E-7 |

### comp1.RgZg (comp1\_RgZg)

#### GENERAL

| Description          | Value    |
|----------------------|----------|
| Field components     | {Rg, Zg} |
| Solve for this field | Off      |

### Time-Dependent Solver 1 (t1)

#### GENERAL

| Description | Value |
|-------------|-------|
|-------------|-------|

| Description  | Value                                                                                                                                                                                                                                                                                                                                                                                                                                                                                                                                                                                                                                                                                                                                                                                                                                                                                                                                                                                                                                                                                                                                                                                                                                                                                                                                                                                                                                                                                                                                                                                                                                                                                                                                                                                                                                                                                                                                                                                                                                                                                                                                                                                                                                                                                                                                                                                                                                                                                                                                                                                                                                                                                                                                                                                                                                                                                                                                                                                                                                                                          |
|--------------|--------------------------------------------------------------------------------------------------------------------------------------------------------------------------------------------------------------------------------------------------------------------------------------------------------------------------------------------------------------------------------------------------------------------------------------------------------------------------------------------------------------------------------------------------------------------------------------------------------------------------------------------------------------------------------------------------------------------------------------------------------------------------------------------------------------------------------------------------------------------------------------------------------------------------------------------------------------------------------------------------------------------------------------------------------------------------------------------------------------------------------------------------------------------------------------------------------------------------------------------------------------------------------------------------------------------------------------------------------------------------------------------------------------------------------------------------------------------------------------------------------------------------------------------------------------------------------------------------------------------------------------------------------------------------------------------------------------------------------------------------------------------------------------------------------------------------------------------------------------------------------------------------------------------------------------------------------------------------------------------------------------------------------------------------------------------------------------------------------------------------------------------------------------------------------------------------------------------------------------------------------------------------------------------------------------------------------------------------------------------------------------------------------------------------------------------------------------------------------------------------------------------------------------------------------------------------------------------------------------------------------------------------------------------------------------------------------------------------------------------------------------------------------------------------------------------------------------------------------------------------------------------------------------------------------------------------------------------------------------------------------------------------------------------------------------------------------|
| Output times | {214.50000000000003, 214.52750000000003, 214.55500000000004,<br>214.58250000000004, 214.61000000000004, 214.63750000000002,<br>214.66500000000002, 214.69250000000002, 214.72000000000003,<br>214.74750000000003, 214.77500000000003, 214.80250000000004,<br>214.83000000000004, 214.85750000000002, 214.88500000000002,<br>214.91250000000002, 214.94000000000003, 214.96750000000003,<br>214.99500000000003, 215.02250000000004, 215.05000000000004,<br>215.07750000000001, 215.10500000000002, 215.13250000000002,<br>215.16000000000003, 215.18750000000003, 215.21500000000003,<br>215.24250000000004, 215.27000000000004, 215.29750000000004,<br>215.32500000000002, 215.35250000000002, 215.38000000000002,<br>215.40750000000003, 215.43500000000003, 215.46250000000003,<br>215.49000000000004, 215.51750000000004, 215.54500000000002,<br>215.57250000000002, 215.60000000000002, 215.62750000000003,<br>215.65500000000003, 215.68250000000003, 215.71000000000004,<br>215.73750000000004, 215.76500000000001, 215.79250000000002,<br>215.82000000000002, 215.84750000000003, 215.87500000000003,<br>215.90250000000003, 215.93000000000004, 215.95750000000004,<br>215.98500000000004, 216.01250000000002, 216.04000000000002,<br>216.06750000000002, 216.09500000000003, 216.12250000000003,<br>216.15000000000003, 216.17750000000004, 216.20500000000004,<br>216.23250000000002, 216.26000000000002, 216.28750000000002,<br>216.31500000000003, 216.34250000000003, 216.37000000000003,<br>216.39750000000004, 216.42500000000004, 216.45250000000001,<br>216.48000000000002, 216.50750000000002, 216.53500000000003,<br>216.56250000000003, 216.59000000000003, 216.61750000000004,<br>216.64500000000004, 216.67250000000004, 216.70000000000002,<br>216.72750000000002, 216.75500000000002, 216.78250000000003,<br>216.81000000000003, 216.83750000000003, 216.86500000000004,<br>216.89250000000004, 216.92000000000002, 216.94750000000002,<br>216.97500000000002, 217.00250000000003, 217.03000000000003,<br>217.05750000000003, 217.08500000000004, 217.11250000000004,<br>217.14000000000004, 217.16750000000002, 217.19500000000002,<br>217.22250000000003, 217.25000000000003, 217.27750000000003,<br>217.30500000000004, 217.33250000000004, 217.36000000000004,<br>217.38750000000002, 217.41500000000002, 217.44250000000002,<br>217.47000000000003, 217.49750000000003, 217.52500000000003,<br>217.55250000000004, 217.58000000000004, 217.60750000000002,<br>217.63500000000002, 217.66250000000002, 217.69000000000003,<br>217.71750000000003, 217.74500000000003, 217.77250000000004,<br>217.80000000000004, 217.82750000000004, 217.85500000000002,<br>217.88250000000002, 217.91000000000003, 217.93750000000003,<br>217.96500000000003, 217.99250000000004, 218.02000000000004,<br>218.04750000000004, 218.07500000000002, 218.10250000000002,<br>218.13000000000002, 218.15750000000003, 218.18500000000003,<br>218.21250000000003, 218.24000000000004, 218.26750000000004,<br>218.29500000000002, 218.32250000000002, 218.35000000000002, |

| Description | Value                                                                                                                                                                                                                                                                                                                                                                                                                                                                                                                                                                                                                                                                                                                                                                                                                                                                                                                                                                                                                                                                                                                                                                                                                                                                                                                                                                                                                                                                                                                                                                                                                                                                                                                                                                                                                                                                                                                                                                                                                                                                                                                                                                                                                                                                                                                                                                                                                                                                                                                                                                                                                                                                                                                                                                                                                                                                                                                                                                                                                                                                         |
|-------------|-------------------------------------------------------------------------------------------------------------------------------------------------------------------------------------------------------------------------------------------------------------------------------------------------------------------------------------------------------------------------------------------------------------------------------------------------------------------------------------------------------------------------------------------------------------------------------------------------------------------------------------------------------------------------------------------------------------------------------------------------------------------------------------------------------------------------------------------------------------------------------------------------------------------------------------------------------------------------------------------------------------------------------------------------------------------------------------------------------------------------------------------------------------------------------------------------------------------------------------------------------------------------------------------------------------------------------------------------------------------------------------------------------------------------------------------------------------------------------------------------------------------------------------------------------------------------------------------------------------------------------------------------------------------------------------------------------------------------------------------------------------------------------------------------------------------------------------------------------------------------------------------------------------------------------------------------------------------------------------------------------------------------------------------------------------------------------------------------------------------------------------------------------------------------------------------------------------------------------------------------------------------------------------------------------------------------------------------------------------------------------------------------------------------------------------------------------------------------------------------------------------------------------------------------------------------------------------------------------------------------------------------------------------------------------------------------------------------------------------------------------------------------------------------------------------------------------------------------------------------------------------------------------------------------------------------------------------------------------------------------------------------------------------------------------------------------------|
|             | 218.37750000000003, 218.40500000000003, 218.43250000000003,<br>218.46000000000004, 218.48750000000004, 218.51500000000004,<br>218.54250000000002, 218.57000000000002, 218.59750000000003,<br>218.62500000000003, 218.65250000000003, 218.68000000000004,<br>218.70750000000004, 218.73500000000004, 218.76250000000002,<br>218.79000000000002, 218.81750000000002, 218.84500000000003,<br>218.87250000000003, 218.90000000000003, 218.92750000000004,<br>218.95500000000004, 218.98250000000002, 219.01000000000002,<br>219.03750000000002, 219.06500000000003, 219.09250000000003,<br>219.12000000000003, 219.14750000000004, 219.17500000000004,<br>219.20250000000004, 219.23000000000002, 219.25750000000002,<br>219.28500000000003, 219.31250000000003, 219.34000000000003,<br>219.36750000000004, 219.39500000000004, 219.42250000000004,<br>219.45000000000002, 219.47750000000002, 219.50500000000002,<br>219.53250000000003, 219.56000000000003, 219.58750000000003,<br>219.61500000000004, 219.64250000000004, 219.67000000000002,<br>219.69750000000002, 219.72500000000002, 219.75250000000003,<br>219.78000000000003, 219.80750000000003, 219.83500000000004,<br>219.86250000000004, 219.89000000000004, 219.91750000000002,<br>219.94500000000002, 219.97250000000003, 220.00000000000003,<br>220.02750000000003, 220.05500000000004, 220.08250000000004,<br>220.11000000000004, 220.13750000000002, 220.16500000000002,<br>220.19250000000002, 220.22000000000003, 220.24750000000003,<br>220.27500000000003, 220.30250000000004, 220.33000000000004,<br>220.35750000000002, 220.38500000000002, 220.41250000000002,<br>220.44000000000003, 220.46750000000003, 220.49500000000003,<br>220.52250000000004, 220.55000000000004, 220.57750000000004,<br>220.60500000000002, 220.63250000000002, 220.66000000000003,<br>220.68750000000003, 220.71500000000003, 220.74250000000004,<br>220.77000000000004, 220.79750000000004, 220.82500000000002,<br>220.85250000000002, 220.88000000000002, 220.90750000000003,<br>220.93500000000003, 220.96250000000003, 220.99000000000004,<br>221.01750000000004, 221.04500000000002, 221.07250000000002,<br>221.10000000000002, 221.12750000000003, 221.15500000000003,<br>221.18250000000003, 221.21000000000004, 221.23750000000004,<br>221.26500000000004, 221.29250000000002, 221.32000000000002,<br>221.34750000000003, 221.37500000000003, 221.40250000000003,<br>221.43000000000004, 221.45750000000004, 221.48500000000004,<br>221.51250000000002, 221.54000000000002, 221.56750000000002,<br>221.59500000000003, 221.62250000000003, 221.65000000000003,<br>221.67750000000004, 221.70500000000004, 221.73250000000002,<br>221.76000000000002, 221.78750000000002, 221.81500000000003,<br>221.84250000000003, 221.87000000000003, 221.89750000000004,<br>221.92500000000004, 221.95250000000004, 221.98000000000002,<br>222.00750000000002, 222.03500000000003, 222.06250000000003,<br>222.09000000000003, 222.11750000000004, 222.14500000000004,<br>222.17250000000004, 222.20000000000002, 222.22750000000002, |

| Description | Value                                                                                                                                                                                                                                                                                                                                                                                                                                                                                                                                                                                                                                                                                                                                                                                                                                                                                                                                                                                                                                                                                                                                                                                                                                                                                                                                                                                                                                                                                                                                                                                                                                                                                                                                                                                                                                                                                                                                                                                                                                                                                                                                                                                                                                                                                                                                                                                                                                                                                                                                                                                                                                                                                                                                                                                                                                                                                                                               |
|-------------|-------------------------------------------------------------------------------------------------------------------------------------------------------------------------------------------------------------------------------------------------------------------------------------------------------------------------------------------------------------------------------------------------------------------------------------------------------------------------------------------------------------------------------------------------------------------------------------------------------------------------------------------------------------------------------------------------------------------------------------------------------------------------------------------------------------------------------------------------------------------------------------------------------------------------------------------------------------------------------------------------------------------------------------------------------------------------------------------------------------------------------------------------------------------------------------------------------------------------------------------------------------------------------------------------------------------------------------------------------------------------------------------------------------------------------------------------------------------------------------------------------------------------------------------------------------------------------------------------------------------------------------------------------------------------------------------------------------------------------------------------------------------------------------------------------------------------------------------------------------------------------------------------------------------------------------------------------------------------------------------------------------------------------------------------------------------------------------------------------------------------------------------------------------------------------------------------------------------------------------------------------------------------------------------------------------------------------------------------------------------------------------------------------------------------------------------------------------------------------------------------------------------------------------------------------------------------------------------------------------------------------------------------------------------------------------------------------------------------------------------------------------------------------------------------------------------------------------------------------------------------------------------------------------------------------------|
|             | 222.25500000000002, 222.28250000000003, 222.31000000000003, 222.33750000000003, 222.36500000000004, 222.39250000000004, 222.42000000000002, 222.44750000000002, 222.47500000000002, 222.50250000000003, 222.53000000000003, 222.55750000000003, 222.58500000000004, 222.61250000000004, 222.64000000000004, 222.66750000000002, 222.69500000000002, 222.72250000000003, 222.75000000000003, 222.77750000000003, 222.80500000000004, 222.83250000000004, 222.86000000000004, 222.88750000000002, 222.91500000000002, 222.94250000000002, 222.97000000000003, 222.99750000000003, 223.02500000000003, 223.05250000000004, 223.08000000000004, 223.10750000000002, 223.13500000000002, 223.16250000000002, 223.19000000000003, 223.21750000000003, 223.24500000000003, 223.27250000000004, 223.30000000000004, 223.32750000000004, 223.35500000000002, 223.38250000000002, 223.41000000000003, 223.43750000000003, 223.46500000000003, 223.49250000000004, 223.52000000000004, 223.54750000000004, 223.57500000000002, 223.60250000000002, 223.63000000000002, 223.65750000000003, 223.68500000000003, 223.71250000000003, 223.74000000000004, 223.76750000000004, 223.79500000000002, 223.82250000000002, 223.85000000000002, 223.87750000000003, 223.90500000000003, 223.93250000000003, 223.96000000000004, 223.98750000000004, 224.01500000000004, 224.04250000000002, 224.07000000000002, 224.09750000000003, 224.12500000000003, 224.15250000000003, 224.18000000000004, 224.20750000000004, 224.23500000000004, 224.26250000000002, 224.29000000000002, 224.31750000000002, 224.34500000000003, 224.37250000000003, 224.40000000000003, 224.42750000000004, 224.45500000000004, 224.48250000000002, 224.51000000000002, 224.53750000000002, 224.56500000000003, 224.59250000000003, 224.62000000000003, 224.64750000000004, 224.67500000000004, 224.70250000000004, 224.73000000000002, 224.75750000000002, 224.78500000000003, 224.81250000000003, 224.84000000000003, 224.86750000000004, 224.89500000000004, 224.92250000000004, 224.95000000000002, 224.97750000000002, 225.00500000000002, 225.03250000000003, 225.06000000000003, 225.08750000000003, 225.11500000000004, 225.14250000000004, 225.17000000000002, 225.19750000000002, 225.22500000000002, 225.25250000000003, 225.28000000000003, 225.30750000000003, 225.33500000000004, 225.36250000000004, 225.39000000000004, 225.41750000000002, 225.44500000000002, 225.47250000000003, 225.50000000000003, 225.52750000000003, 225.55500000000004, 225.58250000000004, 225.61000000000004, 225.63750000000002, 225.66500000000002, 225.69250000000002, 225.72000000000003, 225.74750000000003, 225.77500000000003, 225.80250000000004, 225.83000000000004, 225.85750000000002, 225.88500000000002, 225.91250000000002, 225.94000000000003, 225.96750000000003, 225.99500000000003, 226.02250000000004, 226.05000000000004, 226.07750000000004, 226.10500000000002, |

| Description | Value                                                                                                                                                                                                                                                                                                                                                                                                                                                                                                                                                                                                                                                                                                                                                                                                                                                                                                                                                                                                                                                                                                                                                                                                                                                                                                                                                                                                                                                                                                                                                                                                                                                                                                                                                                                                                                                                                                                                                                                                                                                                                                                                                                                                                                                                                                                                                                                                                                                                                                                                                                                                                                                                                                                                                                                                                                                                                                                               |
|-------------|-------------------------------------------------------------------------------------------------------------------------------------------------------------------------------------------------------------------------------------------------------------------------------------------------------------------------------------------------------------------------------------------------------------------------------------------------------------------------------------------------------------------------------------------------------------------------------------------------------------------------------------------------------------------------------------------------------------------------------------------------------------------------------------------------------------------------------------------------------------------------------------------------------------------------------------------------------------------------------------------------------------------------------------------------------------------------------------------------------------------------------------------------------------------------------------------------------------------------------------------------------------------------------------------------------------------------------------------------------------------------------------------------------------------------------------------------------------------------------------------------------------------------------------------------------------------------------------------------------------------------------------------------------------------------------------------------------------------------------------------------------------------------------------------------------------------------------------------------------------------------------------------------------------------------------------------------------------------------------------------------------------------------------------------------------------------------------------------------------------------------------------------------------------------------------------------------------------------------------------------------------------------------------------------------------------------------------------------------------------------------------------------------------------------------------------------------------------------------------------------------------------------------------------------------------------------------------------------------------------------------------------------------------------------------------------------------------------------------------------------------------------------------------------------------------------------------------------------------------------------------------------------------------------------------------------|
|             | 226.13250000000002, 226.16000000000003, 226.18750000000003, 226.21500000000003, 226.24250000000004, 226.27000000000004, 226.29750000000004, 226.32500000000002, 226.35250000000002, 226.38000000000002, 226.40750000000003, 226.43500000000003, 226.46250000000003, 226.49000000000004, 226.51750000000004, 226.54500000000002, 226.57250000000002, 226.60000000000002, 226.62750000000003, 226.65500000000003, 226.68250000000003, 226.71000000000004, 226.73750000000004, 226.76500000000004, 226.79250000000002, 226.82000000000002, 226.84750000000003, 226.87500000000003, 226.90250000000003, 226.93000000000004, 226.95750000000004, 226.98500000000004, 227.01250000000002, 227.04000000000002, 227.06750000000002, 227.09500000000003, 227.12250000000003, 227.15000000000003, 227.17750000000004, 227.20500000000004, 227.23250000000002, 227.26000000000002, 227.28750000000002, 227.31500000000003, 227.34250000000003, 227.37000000000003, 227.39750000000004, 227.42500000000004, 227.45250000000004, 227.48000000000002, 227.50750000000002, 227.53500000000003, 227.56250000000003, 227.59000000000003, 227.61750000000004, 227.64500000000004, 227.67250000000004, 227.70000000000002, 227.72750000000002, 227.75500000000002, 227.78250000000003, 227.81000000000003, 227.83750000000003, 227.86500000000004, 227.89250000000004, 227.92000000000002, 227.94750000000002, 227.97500000000002, 228.00250000000003, 228.03000000000003, 228.05750000000003, 228.08500000000004, 228.11250000000004, 228.14000000000004, 228.16750000000002, 228.19500000000002, 228.22250000000003, 228.25000000000003, 228.27750000000003, 228.30500000000004, 228.33250000000004, 228.36000000000004, 228.38750000000002, 228.41500000000002, 228.44250000000002, 228.47000000000003, 228.49750000000003, 228.52500000000003, 228.55250000000004, 228.58000000000004, 228.60750000000002, 228.63500000000002, 228.66250000000002, 228.69000000000003, 228.71750000000003, 228.74500000000003, 228.77250000000004, 228.80000000000004, 228.82750000000004, 228.85500000000002, 228.88250000000002, 228.91000000000003, 228.93750000000003, 228.96500000000003, 228.99250000000004, 229.02000000000004, 229.04750000000004, 229.07500000000002, 229.10250000000002, 229.13000000000002, 229.15750000000003, 229.18500000000003, 229.21250000000003, 229.24000000000004, 229.26750000000004, 229.29500000000002, 229.32250000000002, 229.35000000000002, 229.37750000000003, 229.40500000000003, 229.43250000000003, 229.46000000000004, 229.48750000000004, 229.51500000000004, 229.54250000000002, 229.57000000000002, 229.59750000000003, 229.62500000000003, 229.65250000000003, 229.68000000000004, 229.70750000000004, 229.73500000000004, 229.76250000000005, 229.79000000000002, 229.81750000000002, 229.84500000000003, 229.87250000000003, 229.90000000000003, 229.92750000000004, 229.95500000000004, 229.98250000000002, |

| Description | Value                                                                                                                                                                                                                                                                                                                                                                                                                                                                                                                                                                                                                                                                                                                                                                                                                                                                                                                                                                                                                                                                                                                                                                                                                                                                                                                                                                                                                                                                                                                                                                                                                                                                                                                                                                                                                                                                                                                                                                                                                                                                                                                                                                                                                                                                                                                                                                                                                                                                                                                                                                                                                                                                                                                                                                                                                                                                                                                               |
|-------------|-------------------------------------------------------------------------------------------------------------------------------------------------------------------------------------------------------------------------------------------------------------------------------------------------------------------------------------------------------------------------------------------------------------------------------------------------------------------------------------------------------------------------------------------------------------------------------------------------------------------------------------------------------------------------------------------------------------------------------------------------------------------------------------------------------------------------------------------------------------------------------------------------------------------------------------------------------------------------------------------------------------------------------------------------------------------------------------------------------------------------------------------------------------------------------------------------------------------------------------------------------------------------------------------------------------------------------------------------------------------------------------------------------------------------------------------------------------------------------------------------------------------------------------------------------------------------------------------------------------------------------------------------------------------------------------------------------------------------------------------------------------------------------------------------------------------------------------------------------------------------------------------------------------------------------------------------------------------------------------------------------------------------------------------------------------------------------------------------------------------------------------------------------------------------------------------------------------------------------------------------------------------------------------------------------------------------------------------------------------------------------------------------------------------------------------------------------------------------------------------------------------------------------------------------------------------------------------------------------------------------------------------------------------------------------------------------------------------------------------------------------------------------------------------------------------------------------------------------------------------------------------------------------------------------------------|
|             | 230.01000000000002, 230.03750000000002, 230.06500000000003, 230.09250000000003, 230.12000000000003, 230.14750000000004, 230.17500000000004, 230.20250000000004, 230.23000000000002, 230.25750000000002, 230.28500000000003, 230.31250000000003, 230.34000000000003, 230.36750000000004, 230.39500000000004, 230.42250000000004, 230.45000000000005, 230.47750000000002, 230.50500000000002, 230.53250000000003, 230.56000000000003, 230.58750000000003, 230.61500000000004, 230.64250000000004, 230.67000000000002, 230.69750000000002, 230.72500000000002, 230.75250000000003, 230.78000000000003, 230.80750000000003, 230.83500000000004, 230.86250000000004, 230.89000000000004, 230.91750000000002, 230.94500000000002, 230.97250000000003, 231.00000000000003, 231.02750000000003, 231.05500000000004, 231.08250000000004, 231.11000000000004, 231.13750000000005, 231.16500000000002, 231.19250000000002, 231.22000000000003, 231.24750000000003, 231.27500000000003, 231.30250000000004, 231.33000000000004, 231.35750000000002, 231.38500000000002, 231.41250000000002, 231.44000000000003, 231.46750000000003, 231.49500000000003, 231.52250000000004, 231.55000000000004, 231.57750000000004, 231.60500000000002, 231.63250000000002, 231.66000000000003, 231.68750000000003, 231.71500000000003, 231.74250000000004, 231.77000000000004, 231.79750000000004, 231.82500000000005, 231.85250000000002, 231.88000000000002, 231.90750000000003, 231.93500000000003, 231.96250000000003, 231.99000000000004, 232.01750000000004, 232.04500000000002, 232.07250000000002, 232.10000000000002, 232.12750000000003, 232.15500000000003, 232.18250000000003, 232.21000000000004, 232.23750000000004, 232.26500000000004, 232.29250000000002, 232.32000000000002, 232.34750000000003, 232.37500000000003, 232.40250000000003, 232.43000000000004, 232.45750000000004, 232.48500000000004, 232.51250000000005, 232.54000000000002, 232.56750000000002, 232.59500000000003, 232.62250000000003, 232.65000000000003, 232.67750000000004, 232.70500000000004, 232.73250000000002, 232.76000000000002, 232.78750000000002, 232.81500000000003, 232.84250000000003, 232.87000000000003, 232.89750000000004, 232.92500000000004, 232.95250000000004, 232.98000000000002, 233.00750000000002, 233.03500000000003, 233.06250000000003, 233.09000000000003, 233.11750000000004, 233.14500000000004, 233.17250000000004, 233.20000000000005, 233.22750000000002, 233.25500000000002, 233.28250000000003, 233.31000000000003, 233.33750000000003, 233.36500000000004, 233.39250000000004, 233.42000000000002, 233.44750000000002, 233.47500000000002, 233.50250000000003, 233.53000000000003, 233.55750000000003, 233.58500000000004, 233.61250000000004, 233.64000000000004, 233.66750000000002, 233.69500000000002, 233.72250000000003, 233.75000000000003, 233.77750000000003, 233.80500000000004, 233.83250000000004, 233.86000000000004, |



| Description | Value                                                                                                                                                                                                                                                                                                                                                                                                                                                                                                                                                                                                                                                                                                                                                                                                                                                                                                                                                                                                                                                                                                                                                                                                                                                                                                                                                                                                                                                                                                                                                                                                                                                                                                                                                                                                                                                                                                                                                                                                                                                                                                                                                                                                                                                                                                                                                                                                                                                                                                                                                                                                                                                                                                                                                                                                                                                                                                                               |
|-------------|-------------------------------------------------------------------------------------------------------------------------------------------------------------------------------------------------------------------------------------------------------------------------------------------------------------------------------------------------------------------------------------------------------------------------------------------------------------------------------------------------------------------------------------------------------------------------------------------------------------------------------------------------------------------------------------------------------------------------------------------------------------------------------------------------------------------------------------------------------------------------------------------------------------------------------------------------------------------------------------------------------------------------------------------------------------------------------------------------------------------------------------------------------------------------------------------------------------------------------------------------------------------------------------------------------------------------------------------------------------------------------------------------------------------------------------------------------------------------------------------------------------------------------------------------------------------------------------------------------------------------------------------------------------------------------------------------------------------------------------------------------------------------------------------------------------------------------------------------------------------------------------------------------------------------------------------------------------------------------------------------------------------------------------------------------------------------------------------------------------------------------------------------------------------------------------------------------------------------------------------------------------------------------------------------------------------------------------------------------------------------------------------------------------------------------------------------------------------------------------------------------------------------------------------------------------------------------------------------------------------------------------------------------------------------------------------------------------------------------------------------------------------------------------------------------------------------------------------------------------------------------------------------------------------------------------|
|             | 233.88750000000005, 233.91500000000002, 233.94250000000002, 233.97000000000003, 233.99750000000003, 234.02500000000003, 234.05250000000004, 234.08000000000004, 234.10750000000002, 234.13500000000002, 234.16250000000002, 234.19000000000003, 234.21750000000003, 234.24500000000003, 234.27250000000004, 234.30000000000004, 234.32750000000004, 234.35500000000002, 234.38250000000002, 234.41000000000003, 234.43750000000003, 234.46500000000003, 234.49250000000004, 234.52000000000004, 234.54750000000004, 234.57500000000005, 234.60250000000002, 234.63000000000002, 234.65750000000003, 234.68500000000003, 234.71250000000003, 234.74000000000004, 234.76750000000004, 234.79500000000002, 234.82250000000002, 234.85000000000002, 234.87750000000003, 234.90500000000003, 234.93250000000003, 234.96000000000004, 234.98750000000004, 235.01500000000004, 235.04250000000002, 235.07000000000002, 235.09750000000003, 235.12500000000003, 235.15250000000003, 235.18000000000004, 235.20750000000004, 235.23500000000004, 235.26250000000005, 235.29000000000002, 235.31750000000002, 235.34500000000003, 235.37250000000003, 235.40000000000003, 235.42750000000004, 235.45500000000004, 235.48250000000002, 235.51000000000002, 235.53750000000002, 235.56500000000003, 235.59250000000003, 235.62000000000003, 235.64750000000004, 235.67500000000004, 235.70250000000004, 235.73000000000002, 235.75750000000002, 235.78500000000003, 235.81250000000003, 235.84000000000003, 235.86750000000004, 235.89500000000004, 235.92250000000004, 235.95000000000005, 235.97750000000002, 236.00500000000002, 236.03250000000003, 236.06000000000003, 236.08750000000003, 236.11500000000004, 236.14250000000004, 236.17000000000002, 236.19750000000002, 236.22500000000002, 236.25250000000003, 236.28000000000003, 236.30750000000003, 236.33500000000004, 236.36250000000004, 236.39000000000004, 236.41750000000002, 236.44500000000002, 236.47250000000003, 236.50000000000003, 236.52750000000003, 236.55500000000004, 236.58250000000004, 236.61000000000004, 236.63750000000005, 236.66500000000002, 236.69250000000002, 236.72000000000003, 236.74750000000003, 236.77500000000003, 236.80250000000004, 236.83000000000004, 236.85750000000002, 236.88500000000002, 236.91250000000002, 236.94000000000003, 236.96750000000003, 236.99500000000003, 237.02250000000004, 237.05000000000004, 237.07750000000004, 237.10500000000002, 237.13250000000002, 237.16000000000003, 237.18750000000003, 237.21500000000003, 237.24250000000004, 237.27000000000004, 237.29750000000004, 237.32500000000005, 237.35250000000002, 237.38000000000002, 237.40750000000003, 237.43500000000003, 237.46250000000003, 237.49000000000004, 237.51750000000004, 237.54500000000002, 237.57250000000002, 237.60000000000002, 237.62750000000003, 237.65500000000003, 237.68250000000003, 237.71000000000004, 237.73750000000004, |

| Description | Value                                                                                                                                                                                                                                                                                                                                                                                                                                                                                                                                                                                                                                                                                                                                                                                                                                                                                                                                                                                                                                                                                                                                                                                                                                                                                                                                                                                                                                                                                                                                                                                                                                                                                                                                                                                                                                                                                                                                                                                                                                                                                                                                                                                                                                                                                                                                                                                                                                                                                                                                                                                                                                                                                                                                                                                                                                                                                                                                                                                                                                                                         |
|-------------|-------------------------------------------------------------------------------------------------------------------------------------------------------------------------------------------------------------------------------------------------------------------------------------------------------------------------------------------------------------------------------------------------------------------------------------------------------------------------------------------------------------------------------------------------------------------------------------------------------------------------------------------------------------------------------------------------------------------------------------------------------------------------------------------------------------------------------------------------------------------------------------------------------------------------------------------------------------------------------------------------------------------------------------------------------------------------------------------------------------------------------------------------------------------------------------------------------------------------------------------------------------------------------------------------------------------------------------------------------------------------------------------------------------------------------------------------------------------------------------------------------------------------------------------------------------------------------------------------------------------------------------------------------------------------------------------------------------------------------------------------------------------------------------------------------------------------------------------------------------------------------------------------------------------------------------------------------------------------------------------------------------------------------------------------------------------------------------------------------------------------------------------------------------------------------------------------------------------------------------------------------------------------------------------------------------------------------------------------------------------------------------------------------------------------------------------------------------------------------------------------------------------------------------------------------------------------------------------------------------------------------------------------------------------------------------------------------------------------------------------------------------------------------------------------------------------------------------------------------------------------------------------------------------------------------------------------------------------------------------------------------------------------------------------------------------------------------|
|             | 237.76500000000004, 237.79250000000002, 237.82000000000002,<br>237.84750000000003, 237.87500000000003, 237.90250000000003,<br>237.93000000000004, 237.95750000000004, 237.98500000000004,<br>238.01250000000005, 238.04000000000002, 238.06750000000002,<br>238.09500000000003, 238.12250000000003, 238.15000000000003,<br>238.17750000000004, 238.20500000000004, 238.23250000000002,<br>238.26000000000002, 238.28750000000002, 238.31500000000003,<br>238.34250000000003, 238.37000000000003, 238.39750000000004,<br>238.42500000000004, 238.45250000000004, 238.48000000000002,<br>238.50750000000002, 238.53500000000003, 238.56250000000003,<br>238.59000000000003, 238.61750000000004, 238.64500000000004,<br>238.67250000000004, 238.70000000000005, 238.72750000000002,<br>238.75500000000002, 238.78250000000003, 238.81000000000003,<br>238.83750000000003, 238.86500000000004, 238.89250000000004,<br>238.92000000000002, 238.94750000000002, 238.97500000000002,<br>239.00250000000003, 239.03000000000003, 239.05750000000003,<br>239.08500000000004, 239.11250000000004, 239.14000000000004,<br>239.16750000000002, 239.19500000000002, 239.22250000000003,<br>239.25000000000003, 239.27750000000003, 239.30500000000004,<br>239.33250000000004, 239.36000000000004, 239.38750000000005,<br>239.41500000000002, 239.44250000000002, 239.47000000000003,<br>239.49750000000003, 239.52500000000003, 239.55250000000004,<br>239.58000000000004, 239.60750000000002, 239.63500000000002,<br>239.66250000000002, 239.69000000000003, 239.71750000000003,<br>239.74500000000003, 239.77250000000004, 239.80000000000004,<br>239.82750000000004, 239.85500000000002, 239.88250000000002,<br>239.91000000000003, 239.93750000000003, 239.96500000000003,<br>239.99250000000004, 240.02000000000004, 240.04750000000004,<br>240.07500000000005, 240.10250000000002, 240.13000000000002,<br>240.15750000000003, 240.18500000000003, 240.21250000000003,<br>240.24000000000004, 240.26750000000004, 240.29500000000002,<br>240.32250000000005, 240.35000000000002, 240.37750000000003,<br>240.40500000000003, 240.43250000000003, 240.46000000000004,<br>240.48750000000004, 240.51500000000004, 240.54250000000002,<br>240.57000000000002, 240.59750000000003, 240.62500000000003,<br>240.65250000000003, 240.68000000000004, 240.70750000000004,<br>240.73500000000004, 240.76250000000005, 240.79000000000002,<br>240.81750000000002, 240.84500000000003, 240.87250000000003,<br>240.90000000000003, 240.92750000000004, 240.95500000000004,<br>240.98250000000002, 241.01000000000005, 241.03750000000002,<br>241.06500000000003, 241.09250000000003, 241.12000000000003,<br>241.14750000000004, 241.17500000000004, 241.20250000000004,<br>241.23000000000002, 241.25750000000002, 241.28500000000003,<br>241.31250000000003, 241.34000000000003, 241.36750000000004,<br>241.39500000000004, 241.42250000000004, 241.45000000000005,<br>241.47750000000002, 241.50500000000002, 241.53250000000003,<br>241.56000000000003, 241.58750000000003, 241.61500000000004, |

| Description        | Value                                                                                                                                                                                                                                                                                   |
|--------------------|-----------------------------------------------------------------------------------------------------------------------------------------------------------------------------------------------------------------------------------------------------------------------------------------|
|                    | 241.64250000000004, 241.67000000000004, 241.69750000000005, 241.72500000000002, 241.75250000000003, 241.78000000000003, 241.80750000000003, 241.83500000000004, 241.86250000000004, 241.89000000000004, 241.91750000000002, 241.94500000000002, 241.97250000000003, 242.00000000000003} |
| Relative tolerance | 0.005                                                                                                                                                                                                                                                                                   |

#### TIME STEPPING

| Description          | Value |
|----------------------|-------|
| Maximum BDF order    | 2     |
| Nonlinear controller | On    |

#### LOG

|     |        |          |    |    |    |   |   |   |         |         |  |
|-----|--------|----------|----|----|----|---|---|---|---------|---------|--|
| -   | 234.52 | - out    |    |    |    |   |   |   |         |         |  |
| -   | 234.55 | - out    |    |    |    |   |   |   |         |         |  |
| 381 | 234.57 | 0.055    | 6  | 4  | 6  | 2 | 0 | 0 | 3.7e-13 | 2.6e-15 |  |
| -   | 234.58 | - out    |    |    |    |   |   |   |         |         |  |
| -   | 234.6  | - out    |    |    |    |   |   |   |         |         |  |
| -   | 234.63 | - out    |    |    |    |   |   |   |         |         |  |
| 382 | 234.64 | 0.070034 | 10 | 6  | 10 | 2 | 1 | 0 | 1e-13   | 4.8e-15 |  |
| -   | 234.66 | - out    |    |    |    |   |   |   |         |         |  |
| -   | 234.69 | - out    |    |    |    |   |   |   |         |         |  |
| 383 | 234.71 | 0.070034 | 12 | 7  | 12 | 2 | 1 | 0 | 4.1e-14 | 6.1e-15 |  |
| -   | 234.71 | - out    |    |    |    |   |   |   |         |         |  |
| -   | 234.74 | - out    |    |    |    |   |   |   |         |         |  |
| -   | 234.77 | - out    |    |    |    |   |   |   |         |         |  |
| 384 | 234.77 | 0.063031 | 14 | 8  | 14 | 2 | 1 | 0 | 1.1e-13 | 6.6e-15 |  |
| -   | 234.8  | - out    |    |    |    |   |   |   |         |         |  |
| -   | 234.82 | - out    |    |    |    |   |   |   |         |         |  |
| 385 | 234.83 | 0.056727 | 16 | 9  | 16 | 2 | 1 | 0 | 9.1e-14 | 7.6e-15 |  |
| -   | 234.85 | - out    |    |    |    |   |   |   |         |         |  |
| -   | 234.88 | - out    |    |    |    |   |   |   |         |         |  |
| 386 | 234.88 | 0.056727 | 18 | 10 | 18 | 1 | 1 | 0 | 2.4e-13 | 3.9e-15 |  |
| -   | 234.91 | - out    |    |    |    |   |   |   |         |         |  |
| -   | 234.93 | - out    |    |    |    |   |   |   |         |         |  |
| 387 | 234.94 | 0.050733 | 20 | 11 | 20 | 1 | 1 | 0 | 1.2e-13 | 5.5e-15 |  |
| -   | 234.96 | - out    |    |    |    |   |   |   |         |         |  |
| 388 | 234.98 | 0.043626 | 22 | 12 | 22 | 1 | 1 | 0 | 1.6e-13 | 6.2e-15 |  |
| -   | 234.99 | - out    |    |    |    |   |   |   |         |         |  |
| -   | 235.02 | - out    |    |    |    |   |   |   |         |         |  |
| 389 | 235.02 | 0.038946 | 24 | 13 | 24 | 1 | 1 | 0 | 1.1e-13 | 6.3e-15 |  |
| -   | 235.04 | - out    |    |    |    |   |   |   |         |         |  |
| 390 | 235.05 | 0.035052 | 26 | 14 | 26 | 1 | 1 | 0 | 2e-13   | 6.7e-15 |  |
| -   | 235.07 | - out    |    |    |    |   |   |   |         |         |  |
| 391 | 235.08 | 0.031547 | 28 | 15 | 28 | 1 | 1 | 0 | 1.4e-13 | 6.9e-15 |  |
| -   | 235.1  | - out    |    |    |    |   |   |   |         |         |  |
| 392 | 235.12 | 0.031547 | 30 | 16 | 30 | 1 | 1 | 0 | 2.7e-13 | 6.4e-15 |  |
| -   | 235.13 | - out    |    |    |    |   |   |   |         |         |  |
| 393 | 235.15 | 0.031547 | 32 | 17 | 32 | 1 | 1 | 0 | 7.3e-14 | 6.2e-15 |  |
| -   | 235.15 | - out    |    |    |    |   |   |   |         |         |  |
| -   | 235.18 | - out    |    |    |    |   |   |   |         |         |  |
| -   | 235.21 | - out    |    |    |    |   |   |   |         |         |  |
| 394 | 235.21 | 0.063093 | 34 | 18 | 34 | 2 | 1 | 0 | 1.5e-13 | 4.6e-15 |  |
| -   | 235.24 | - out    |    |    |    |   |   |   |         |         |  |
| -   | 235.26 | - out    |    |    |    |   |   |   |         |         |  |
| 395 | 235.27 | 0.063093 | 36 | 19 | 36 | 2 | 1 | 0 | 5.7e-13 | 3.2e-15 |  |
| -   | 235.29 | - out    |    |    |    |   |   |   |         |         |  |
| -   | 235.32 | - out    |    |    |    |   |   |   |         |         |  |
| 396 | 235.34 | 0.063093 | 38 | 20 | 38 | 2 | 1 | 0 | 3.4e-14 | 9.2e-15 |  |
| -   | 235.35 | - out    |    |    |    |   |   |   |         |         |  |
| -   | 235.37 | - out    |    |    |    |   |   |   |         |         |  |
| -   | 235.4  | - out    |    |    |    |   |   |   |         |         |  |
| 397 | 235.4  | 0.063093 | 40 | 21 | 40 | 2 | 1 | 0 | 6.1e-13 | 9e-15   |  |
| -   | 235.43 | - out    |    |    |    |   |   |   |         |         |  |
| -   | 235.46 | - out    |    |    |    |   |   |   |         |         |  |
| 398 | 235.46 | 0.063093 | 42 | 22 | 42 | 2 | 1 | 0 | 6.3e-14 | 9.1e-15 |  |
| -   | 235.48 | - out    |    |    |    |   |   |   |         |         |  |
| -   | 235.51 | - out    |    |    |    |   |   |   |         |         |  |
| 399 | 235.53 | 0.063093 | 44 | 23 | 44 | 2 | 1 | 0 | 3.2e-13 | 8.7e-15 |  |

```

-      235.54      - out
-      235.57      - out
400    235.59      0.063093      46  24  46  2  1  0  2e-13  8.6e-15
-      235.59      - out
-      235.62      - out
-      235.65      - out
401    235.65      0.063093      48  25  48  2  1  0  2.2e-13  8.3e-15
-      235.65      - out
402    235.72      0.063093      50  26  50  2  1  0  5.1e-13  6.7e-15
Number of vertex elements: 3
Number of boundary elements: 112
Number of vertex elements: 3
Number of boundary elements: 112
Number of elements: 534
Minimum element quality: 0.5661
Number of vertex elements: 4
Number of boundary elements: 162
Number of vertex elements: 5
Number of boundary elements: 212
Number of vertex elements: 6
Number of boundary elements: 266
Minimum element quality: 0.3716
Geometry shape function: Linear Lagrange
Time interval 7
Time-dependent solver (BDF)
Number of degrees of freedom solved for: 11758 (plus 7124 internal DOFs).
Nonsymmetric matrix found.
Scales for dependent variables:
Concentration (compl.cOx): 13
Concentration (compl.cRed): 7.1
Spatial mesh displacement (compl.spatial.disp): 2.4e-07
Step      Time      Stepsize      Res  Jac  Sol  Order  Tfail  NLfail  LinErr  LinRes
-      235.65      - out
-      235.68      - out
403    235.68      0.0275      2  2  2  1  0  0  1.9e-13  2.6e-15
-      235.7  - out
404    235.71      0.0275      4  3  4  1  0  0  6.8e-13  3.6e-15
-      235.73      - out
-      235.76      - out
405    235.76      0.055      6  4  6  2  0  0  1.2e-12  1.4e-15
-      235.79      - out
-      235.81      - out
406    235.82      0.055      8  5  8  2  0  0  8.5e-13  3e-15
-      235.84      - out
-      235.87      - out
407    235.87      0.055      10  6  10  2  0  0  1.5e-12  9e-15
-      235.9  - out
-      235.92      - out
408    235.93      0.055      12  7  12  2  0  0  3.8e-13  9.3e-15
-      235.95      - out
-      235.98      - out
409    235.98      0.055      14  8  14  2  0  0  6.3e-13  8.4e-15
-      236.01      - out
-      236.03      - out
410    236.04      0.055      16  9  16  2  0  0  4.1e-12  8.5e-15
-      236.06      - out

```

|     |        |          |    |    |    |   |   |   |         |         |  |
|-----|--------|----------|----|----|----|---|---|---|---------|---------|--|
| -   | 236.09 | - out    |    |    |    |   |   |   |         |         |  |
| 411 | 236.09 | 0.055    | 18 | 10 | 18 | 2 | 0 | 0 | 1.1e-12 | 8.3e-15 |  |
| -   | 236.12 | - out    |    |    |    |   |   |   |         |         |  |
| -   | 236.14 | - out    |    |    |    |   |   |   |         |         |  |
| 412 | 236.15 | 0.055    | 20 | 11 | 20 | 2 | 0 | 0 | 1.5e-12 | 8.2e-15 |  |
| -   | 236.17 | - out    |    |    |    |   |   |   |         |         |  |
| -   | 236.2  | - out    |    |    |    |   |   |   |         |         |  |
| 413 | 236.2  | 0.055    | 22 | 12 | 22 | 2 | 0 | 0 | 1.2e-12 | 7.8e-15 |  |
| -   | 236.23 | - out    |    |    |    |   |   |   |         |         |  |
| -   | 236.25 | - out    |    |    |    |   |   |   |         |         |  |
| 414 | 236.26 | 0.055    | 24 | 13 | 24 | 2 | 0 | 0 | 4.4e-13 | 7.9e-15 |  |
| -   | 236.28 | - out    |    |    |    |   |   |   |         |         |  |
| -   | 236.31 | - out    |    |    |    |   |   |   |         |         |  |
| 415 | 236.31 | 0.055    | 26 | 14 | 26 | 2 | 0 | 0 | 2.9e-13 | 7.3e-15 |  |
| -   | 236.34 | - out    |    |    |    |   |   |   |         |         |  |
| -   | 236.36 | - out    |    |    |    |   |   |   |         |         |  |
| 416 | 236.37 | 0.055    | 28 | 15 | 28 | 2 | 0 | 0 | 2.6e-12 | 7.1e-15 |  |
| -   | 236.39 | - out    |    |    |    |   |   |   |         |         |  |
| -   | 236.42 | - out    |    |    |    |   |   |   |         |         |  |
| 417 | 236.42 | 0.055    | 30 | 16 | 30 | 2 | 0 | 0 | 2e-12   | 6.4e-15 |  |
| -   | 236.45 | - out    |    |    |    |   |   |   |         |         |  |
| -   | 236.47 | - out    |    |    |    |   |   |   |         |         |  |
| 418 | 236.48 | 0.055    | 32 | 17 | 32 | 2 | 0 | 0 | 5e-13   | 6.2e-15 |  |
| -   | 236.5  | - out    |    |    |    |   |   |   |         |         |  |
| 419 | 236.5  | 0.023835 | 36 | 19 | 36 | 2 | 1 | 0 | 1.9e-12 | 5.1e-15 |  |
| 420 | 236.52 | 0.015531 | 40 | 21 | 40 | 2 | 2 | 0 | 1.7e-12 | 6.3e-15 |  |
| -   | 236.53 | - out    |    |    |    |   |   |   |         |         |  |
| 421 | 236.53 | 0.013761 | 42 | 22 | 42 | 2 | 2 | 0 | 3.1e-12 | 5.3e-15 |  |
| 422 | 236.54 | 0.012385 | 44 | 23 | 44 | 2 | 2 | 0 | 1.5e-13 | 1.1e-13 |  |
| -   | 236.56 | - out    |    |    |    |   |   |   |         |         |  |
| 423 | 236.56 | 0.012385 | 46 | 24 | 46 | 2 | 2 | 0 | 2e-13   | 9.9e-14 |  |
| 424 | 236.57 | 0.012385 | 48 | 25 | 48 | 2 | 2 | 0 | 1.7e-13 | 5.3e-14 |  |
| 425 | 236.58 | 0.012385 | 50 | 26 | 50 | 2 | 2 | 0 | 4.4e-13 | 1.1e-14 |  |
| -   | 236.58 | - out    |    |    |    |   |   |   |         |         |  |
| 426 | 236.6  | 0.02477  | 52 | 27 | 52 | 2 | 2 | 0 | 3.2e-13 | 6e-15   |  |
| -   | 236.61 | - out    |    |    |    |   |   |   |         |         |  |
| -   | 236.64 | - out    |    |    |    |   |   |   |         |         |  |
| 427 | 236.65 | 0.049541 | 54 | 28 | 54 | 2 | 2 | 0 | 3.5e-12 | 4.6e-15 |  |
| -   | 236.67 | - out    |    |    |    |   |   |   |         |         |  |
| -   | 236.69 | - out    |    |    |    |   |   |   |         |         |  |
| 428 | 236.7  | 0.049541 | 56 | 29 | 56 | 2 | 2 | 0 | 5.2e-12 | 5.4e-15 |  |
| -   | 236.72 | - out    |    |    |    |   |   |   |         |         |  |
| -   | 236.75 | - out    |    |    |    |   |   |   |         |         |  |
| 429 | 236.75 | 0.049541 | 58 | 30 | 58 | 2 | 2 | 0 | 3.8e-12 | 5.5e-15 |  |
| -   | 236.78 | - out    |    |    |    |   |   |   |         |         |  |
| -   | 236.8  | - out    |    |    |    |   |   |   |         |         |  |
| 430 | 236.8  | 0.049541 | 60 | 31 | 60 | 2 | 2 | 0 | 6.1e-12 | 5.8e-15 |  |
| -   | 236.83 | - out    |    |    |    |   |   |   |         |         |  |
| 431 | 236.85 | 0.049541 | 62 | 32 | 62 | 2 | 2 | 0 | 2.2e-13 | 6.3e-15 |  |
| -   | 236.86 | - out    |    |    |    |   |   |   |         |         |  |
| -   | 236.89 | - out    |    |    |    |   |   |   |         |         |  |
| 432 | 236.9  | 0.049541 | 64 | 33 | 64 | 2 | 2 | 0 | 4e-12   | 6.9e-15 |  |
| -   | 236.91 | - out    |    |    |    |   |   |   |         |         |  |
| -   | 236.94 | - out    |    |    |    |   |   |   |         |         |  |
| 433 | 236.95 | 0.049541 | 66 | 34 | 66 | 2 | 2 | 0 | 9.9e-13 | 7.1e-15 |  |
| -   | 236.97 | - out    |    |    |    |   |   |   |         |         |  |

```

-          237          - out
434         237      0.049541      68  35  68    2    2    0  2.3e-12  7.3e-15
-        237.02          - out
-        237.05          - out
435         237.05    0.049541      70  36  70    2    2    0  5.1e-13  7.2e-15
-        237.08          - out
436         237.1     0.049541      72  37  72    2    2    0  2.7e-13  7.4e-15
-        237.1          - out
437         237.15    0.049541      74  38  74    2    2    0  8.2e-13  7.1e-15

```

```

Number of vertex elements: 3
Number of boundary elements: 112
Number of vertex elements: 3
Number of boundary elements: 112
Number of elements: 534
Minimum element quality: 0.5661
Number of vertex elements: 4
Number of boundary elements: 162
Number of vertex elements: 5
Number of boundary elements: 212
Number of vertex elements: 6
Number of boundary elements: 266
Minimum element quality: 0.349
Geometry shape function: Linear Lagrange
Time interval 8
Time-dependent solver (BDF)

```

Number of degrees of freedom solved for: 11758 (plus 7124 internal DOFs).

Nonsymmetric matrix found.

Scales for dependent variables:

Concentration (compl.cOx): 13

Concentration (compl.cRed): 5.3

Spatial mesh displacement (compl.spatial.disp): 2.4e-07

| Step | Time   | Stepsize | Res | Jac | Sol | Order | Tfail | NLfail | LinErr  | LinRes  |
|------|--------|----------|-----|-----|-----|-------|-------|--------|---------|---------|
| -    | 237.1  | - out    |     |     |     |       |       |        |         |         |
| -    | 237.11 | - out    |     |     |     |       |       |        |         |         |
| 438  | 237.13 | 0.0275   | 2   | 2   | 2   | 1     | 0     | 0      | 4.8e-13 | 8.8e-16 |
| -    | 237.13 | - out    |     |     |     |       |       |        |         |         |
| 439  | 237.16 | 0.0275   | 4   | 3   | 4   | 1     | 0     | 0      | 1.3e-12 | 3.4e-15 |
| -    | 237.16 | - out    |     |     |     |       |       |        |         |         |
| -    | 237.19 | - out    |     |     |     |       |       |        |         |         |
| 440  | 237.21 | 0.055    | 6   | 4   | 6   | 2     | 0     | 0      | 7.8e-13 | 7.7e-15 |
| -    | 237.22 | - out    |     |     |     |       |       |        |         |         |
| -    | 237.24 | - out    |     |     |     |       |       |        |         |         |
| 441  | 237.27 | 0.055    | 8   | 5   | 8   | 2     | 0     | 0      | 2.2e-13 | 5.5e-15 |
| -    | 237.27 | - out    |     |     |     |       |       |        |         |         |
| -    | 237.3  | - out    |     |     |     |       |       |        |         |         |
| 442  | 237.32 | 0.055    | 10  | 6   | 10  | 2     | 0     | 0      | 1e-12   | 7.5e-15 |
| -    | 237.33 | - out    |     |     |     |       |       |        |         |         |
| -    | 237.35 | - out    |     |     |     |       |       |        |         |         |
| 443  | 237.38 | 0.055    | 12  | 7   | 12  | 2     | 0     | 0      | 4.4e-13 | 7.8e-15 |
| -    | 237.38 | - out    |     |     |     |       |       |        |         |         |
| -    | 237.41 | - out    |     |     |     |       |       |        |         |         |
| 444  | 237.43 | 0.055    | 14  | 8   | 14  | 2     | 0     | 0      | 1.5e-13 | 7.5e-15 |
| -    | 237.44 | - out    |     |     |     |       |       |        |         |         |
| -    | 237.46 | - out    |     |     |     |       |       |        |         |         |
| 445  | 237.49 | 0.055    | 16  | 9   | 16  | 2     | 0     | 0      | 7.5e-13 | 7.9e-15 |
| -    | 237.49 | - out    |     |     |     |       |       |        |         |         |

|     |        |       |    |    |    |   |   |   |         |         |  |
|-----|--------|-------|----|----|----|---|---|---|---------|---------|--|
| -   | 237.52 | - out |    |    |    |   |   |   |         |         |  |
| 446 | 237.54 | 0.055 | 18 | 10 | 18 | 2 | 0 | 0 | 1.5e-12 | 8e-15   |  |
| -   | 237.55 | - out |    |    |    |   |   |   |         |         |  |
| -   | 237.57 | - out |    |    |    |   |   |   |         |         |  |
| 447 | 237.6  | 0.055 | 20 | 11 | 20 | 2 | 0 | 0 | 3.9e-13 | 7.6e-15 |  |
| -   | 237.6  | - out |    |    |    |   |   |   |         |         |  |
| -   | 237.63 | - out |    |    |    |   |   |   |         |         |  |
| 448 | 237.65 | 0.055 | 22 | 12 | 22 | 2 | 0 | 0 | 3.7e-13 | 7.8e-15 |  |
| -   | 237.66 | - out |    |    |    |   |   |   |         |         |  |
| -   | 237.68 | - out |    |    |    |   |   |   |         |         |  |
| 449 | 237.71 | 0.055 | 24 | 13 | 24 | 2 | 0 | 0 | 8.4e-13 | 8.1e-15 |  |
| -   | 237.71 | - out |    |    |    |   |   |   |         |         |  |
| -   | 237.74 | - out |    |    |    |   |   |   |         |         |  |
| 450 | 237.76 | 0.055 | 26 | 14 | 26 | 2 | 0 | 0 | 7.4e-13 | 8e-15   |  |
| -   | 237.77 | - out |    |    |    |   |   |   |         |         |  |
| -   | 237.79 | - out |    |    |    |   |   |   |         |         |  |
| 451 | 237.82 | 0.055 | 28 | 15 | 28 | 2 | 0 | 0 | 2.7e-13 | 7.7e-15 |  |
| -   | 237.82 | - out |    |    |    |   |   |   |         |         |  |
| -   | 237.85 | - out |    |    |    |   |   |   |         |         |  |
| 452 | 237.87 | 0.055 | 30 | 16 | 30 | 2 | 0 | 0 | 3.9e-13 | 7.9e-15 |  |
| -   | 237.88 | - out |    |    |    |   |   |   |         |         |  |
| -   | 237.9  | - out |    |    |    |   |   |   |         |         |  |
| 453 | 237.93 | 0.055 | 32 | 17 | 32 | 2 | 0 | 0 | 3.3e-13 | 8.2e-15 |  |
| -   | 237.93 | - out |    |    |    |   |   |   |         |         |  |
| -   | 237.96 | - out |    |    |    |   |   |   |         |         |  |
| 454 | 237.98 | 0.055 | 34 | 18 | 34 | 2 | 0 | 0 | 2.8e-13 | 7.7e-15 |  |
| -   | 237.99 | - out |    |    |    |   |   |   |         |         |  |
| -   | 238.01 | - out |    |    |    |   |   |   |         |         |  |
| 455 | 238.04 | 0.055 | 36 | 19 | 36 | 2 | 0 | 0 | 2.7e-13 | 7.6e-15 |  |
| -   | 238.04 | - out |    |    |    |   |   |   |         |         |  |
| 456 | 238.09 | 0.055 | 38 | 20 | 38 | 2 | 0 | 0 | 6.2e-13 | 7.7e-15 |  |

Number of vertex elements: 3

Number of boundary elements: 112

Number of vertex elements: 3

Number of boundary elements: 112

Number of elements: 534

Minimum element quality: 0.5661

Number of vertex elements: 4

Number of boundary elements: 162

Number of vertex elements: 5

Number of boundary elements: 212

Number of vertex elements: 6

Number of boundary elements: 266

Minimum element quality: 0.3041

Geometry shape function: Linear Lagrange

Time interval 9

Time-dependent solver (BDF)

Number of degrees of freedom solved for: 11758 (plus 7124 internal DOFs).

Nonsymmetric matrix found.

Scales for dependent variables:

Concentration (compl.cOx): 26

Concentration (compl.cRed): 16

Spatial mesh displacement (compl.spatial.disp): 2.4e-07

| Step | Time   | Stepsize | Res | Jac | Sol | Order | Tfail | NLfail | LinErr | LinRes |
|------|--------|----------|-----|-----|-----|-------|-------|--------|--------|--------|
| -    | 238.04 | - out    |     |     |     |       |       |        |        |        |
| -    | 238.04 | - out    |     |     |     |       |       |        |        |        |



|     |        |          |    |    |    |   |   |   |         |         |
|-----|--------|----------|----|----|----|---|---|---|---------|---------|
| 457 | 238.06 | 0.0275   | 2  | 2  | 2  | 1 | 0 | 0 | 4.9e-13 | 7.3e-15 |
| -   | 238.07 | - out    |    |    |    |   |   |   |         |         |
| 458 | 238.09 | 0.0275   | 4  | 3  | 4  | 1 | 0 | 0 | 1.2e-13 | 6.9e-15 |
| -   | 238.1  | - out    |    |    |    |   |   |   |         |         |
| -   | 238.12 | - out    |    |    |    |   |   |   |         |         |
| 459 | 238.15 | 0.055    | 6  | 4  | 6  | 2 | 0 | 0 | 2.2e-13 | 9e-15   |
| -   | 238.15 | - out    |    |    |    |   |   |   |         |         |
| -   | 238.18 | - out    |    |    |    |   |   |   |         |         |
| 460 | 238.2  | 0.055    | 8  | 5  | 8  | 2 | 0 | 0 | 2.2e-13 | 1e-14   |
| -   | 238.21 | - out    |    |    |    |   |   |   |         |         |
| -   | 238.23 | - out    |    |    |    |   |   |   |         |         |
| 461 | 238.26 | 0.055    | 10 | 6  | 10 | 2 | 0 | 0 | 1.7e-13 | 6e-15   |
| -   | 238.26 | - out    |    |    |    |   |   |   |         |         |
| -   | 238.29 | - out    |    |    |    |   |   |   |         |         |
| -   | 238.32 | - out    |    |    |    |   |   |   |         |         |
| -   | 238.34 | - out    |    |    |    |   |   |   |         |         |
| 462 | 238.37 | 0.11     | 12 | 7  | 12 | 2 | 0 | 0 | 1.5e-13 | 6.2e-15 |
| -   | 238.37 | - out    |    |    |    |   |   |   |         |         |
| -   | 238.4  | - out    |    |    |    |   |   |   |         |         |
| -   | 238.43 | - out    |    |    |    |   |   |   |         |         |
| 463 | 238.44 | 0.073032 | 16 | 9  | 16 | 2 | 1 | 0 | 3.2e-13 | 6e-15   |
| -   | 238.45 | - out    |    |    |    |   |   |   |         |         |
| -   | 238.48 | - out    |    |    |    |   |   |   |         |         |
| -   | 238.51 | - out    |    |    |    |   |   |   |         |         |
| 464 | 238.51 | 0.073032 | 18 | 10 | 18 | 2 | 1 | 0 | 4.7e-13 | 4.8e-15 |
| -   | 238.54 | - out    |    |    |    |   |   |   |         |         |
| 465 | 238.55 | 0.043154 | 22 | 12 | 22 | 1 | 2 | 0 | 1.7e-13 | 4.5e-15 |
| -   | 238.56 | - out    |    |    |    |   |   |   |         |         |
| -   | 238.59 | - out    |    |    |    |   |   |   |         |         |
| 466 | 238.6  | 0.043154 | 24 | 13 | 24 | 1 | 2 | 0 | 3.3e-13 | 4.6e-15 |
| -   | 238.62 | - out    |    |    |    |   |   |   |         |         |
| 467 | 238.63 | 0.034829 | 26 | 14 | 26 | 1 | 2 | 0 | 5.4e-13 | 4.4e-15 |
| -   | 238.65 | - out    |    |    |    |   |   |   |         |         |
| 468 | 238.66 | 0.028325 | 28 | 15 | 28 | 1 | 2 | 0 | 1.6e-13 | 5.2e-15 |
| -   | 238.67 | - out    |    |    |    |   |   |   |         |         |
| 469 | 238.69 | 0.024585 | 30 | 16 | 30 | 1 | 2 | 0 | 9.3e-14 | 4.1e-15 |
| -   | 238.7  | - out    |    |    |    |   |   |   |         |         |
| 470 | 238.71 | 0.022127 | 32 | 17 | 32 | 1 | 2 | 0 | 6.8e-14 | 3.5e-15 |
| -   | 238.73 | - out    |    |    |    |   |   |   |         |         |
| 471 | 238.73 | 0.019914 | 34 | 18 | 34 | 1 | 2 | 0 | 1e-13   | 4e-15   |
| 472 | 238.75 | 0.017923 | 36 | 19 | 36 | 1 | 2 | 0 | 7.3e-14 | 4.4e-15 |
| -   | 238.76 | - out    |    |    |    |   |   |   |         |         |
| 473 | 238.76 | 0.017923 | 38 | 20 | 38 | 1 | 2 | 0 | 1.8e-13 | 4.4e-15 |
| 474 | 238.78 | 0.017923 | 40 | 21 | 40 | 1 | 2 | 0 | 1.1e-13 | 4.9e-15 |
| -   | 238.78 | - out    |    |    |    |   |   |   |         |         |
| -   | 238.81 | - out    |    |    |    |   |   |   |         |         |
| 475 | 238.82 | 0.035845 | 42 | 22 | 42 | 2 | 2 | 0 | 9.1e-14 | 4.5e-15 |
| -   | 238.84 | - out    |    |    |    |   |   |   |         |         |
| 476 | 238.85 | 0.035845 | 44 | 23 | 44 | 2 | 2 | 0 | 1.2e-12 | 4.5e-15 |
| -   | 238.87 | - out    |    |    |    |   |   |   |         |         |
| 477 | 238.89 | 0.035845 | 46 | 24 | 46 | 2 | 2 | 0 | 3.9e-14 | 3.1e-15 |
| -   | 238.89 | - out    |    |    |    |   |   |   |         |         |
| -   | 238.92 | - out    |    |    |    |   |   |   |         |         |
| 478 | 238.92 | 0.035845 | 48 | 25 | 48 | 2 | 2 | 0 | 4.5e-13 | 3.9e-15 |
| -   | 238.95 | - out    |    |    |    |   |   |   |         |         |
| 479 | 238.96 | 0.035845 | 50 | 26 | 50 | 2 | 2 | 0 | 1e-13   | 3.9e-15 |

|     |        |           |     |    |     |   |   |   |         |         |
|-----|--------|-----------|-----|----|-----|---|---|---|---------|---------|
| -   | 238.98 | - out     |     |    |     |   |   |   |         |         |
| 480 | 239    | 0.035845  | 52  | 27 | 52  | 2 | 2 | 0 | 5e-13   | 2.9e-15 |
| -   | 239    | - out     |     |    |     |   |   |   |         |         |
| -   | 239.03 | - out     |     |    |     |   |   |   |         |         |
| 481 | 239.03 | 0.035845  | 54  | 28 | 54  | 2 | 2 | 0 | 1.7e-13 | 2.9e-15 |
| -   | 239.06 | - out     |     |    |     |   |   |   |         |         |
| 482 | 239.07 | 0.035845  | 56  | 29 | 56  | 2 | 2 | 0 | 5.5e-13 | 4e-15   |
| -   | 239.09 | - out     |     |    |     |   |   |   |         |         |
| 483 | 239.1  | 0.032261  | 58  | 30 | 58  | 2 | 2 | 0 | 1.2e-12 | 4.9e-15 |
| -   | 239.11 | - out     |     |    |     |   |   |   |         |         |
| 484 | 239.13 | 0.032261  | 60  | 31 | 60  | 2 | 2 | 0 | 9.5e-13 | 3.3e-15 |
| -   | 239.14 | - out     |     |    |     |   |   |   |         |         |
| 485 | 239.16 | 0.032261  | 62  | 32 | 62  | 2 | 2 | 0 | 4.3e-13 | 4.4e-15 |
| -   | 239.17 | - out     |     |    |     |   |   |   |         |         |
| -   | 239.2  | - out     |     |    |     |   |   |   |         |         |
| 486 | 239.2  | 0.032261  | 64  | 33 | 64  | 2 | 2 | 0 | 3.1e-13 | 4.6e-15 |
| -   | 239.22 | - out     |     |    |     |   |   |   |         |         |
| 487 | 239.23 | 0.032261  | 66  | 34 | 66  | 2 | 2 | 0 | 1.4e-12 | 3e-15   |
| 488 | 239.24 | 0.014301  | 70  | 36 | 70  | 2 | 3 | 0 | 2.9e-13 | 3e-15   |
| -   | 239.25 | - out     |     |    |     |   |   |   |         |         |
| 489 | 239.25 | 0.0083336 | 75  | 38 | 75  | 2 | 4 | 0 | 2.1e-12 | 6.3e-15 |
| 490 | 239.26 | 0.0049804 | 79  | 40 | 79  | 2 | 5 | 0 | 5.5e-13 | 2e-14   |
| 491 | 239.26 | 0.0049804 | 81  | 41 | 81  | 2 | 5 | 0 | 2.8e-13 | 1.7e-14 |
| 492 | 239.27 | 0.0044824 | 83  | 42 | 83  | 2 | 5 | 0 | 2.8e-14 | 4.7e-14 |
| 493 | 239.27 | 0.0044824 | 85  | 43 | 85  | 1 | 5 | 0 | 3e-13   | 4e-15   |
| -   | 239.28 | - out     |     |    |     |   |   |   |         |         |
| 494 | 239.28 | 0.0089648 | 87  | 44 | 87  | 1 | 5 | 0 | 4.2e-13 | 2.7e-15 |
| 495 | 239.29 | 0.0089648 | 89  | 45 | 89  | 1 | 5 | 0 | 2.9e-13 | 4.2e-15 |
| 496 | 239.3  | 0.0089648 | 91  | 46 | 91  | 1 | 5 | 0 | 2.7e-13 | 3.7e-15 |
| -   | 239.31 | - out     |     |    |     |   |   |   |         |         |
| 497 | 239.32 | 0.01793   | 93  | 47 | 93  | 2 | 5 | 0 | 1.3e-13 | 2.9e-15 |
| -   | 239.33 | - out     |     |    |     |   |   |   |         |         |
| 498 | 239.33 | 0.01793   | 95  | 48 | 95  | 2 | 5 | 0 | 5.9e-13 | 3.2e-15 |
| 499 | 239.35 | 0.01793   | 97  | 49 | 97  | 2 | 5 | 0 | 1.2e-12 | 4.8e-15 |
| -   | 239.36 | - out     |     |    |     |   |   |   |         |         |
| 500 | 239.37 | 0.01793   | 99  | 50 | 99  | 2 | 5 | 0 | 5e-13   | 4.5e-15 |
| 501 | 239.39 | 0.01793   | 101 | 51 | 101 | 2 | 5 | 0 | 2.1e-13 | 4.4e-15 |
| -   | 239.39 | - out     |     |    |     |   |   |   |         |         |
| 502 | 239.41 | 0.01793   | 103 | 52 | 103 | 2 | 5 | 0 | 4.3e-13 | 3.1e-15 |
| -   | 239.42 | - out     |     |    |     |   |   |   |         |         |
| 503 | 239.42 | 0.01793   | 105 | 53 | 105 | 2 | 5 | 0 | 9.2e-14 | 3.1e-15 |
| 504 | 239.44 | 0.01793   | 107 | 54 | 107 | 2 | 5 | 0 | 2.8e-13 | 2.9e-15 |
| -   | 239.44 | - out     |     |    |     |   |   |   |         |         |
| 505 | 239.46 | 0.01793   | 109 | 55 | 109 | 2 | 5 | 0 | 3.5e-13 | 5.7e-15 |
| -   | 239.47 | - out     |     |    |     |   |   |   |         |         |
| 506 | 239.48 | 0.01793   | 111 | 56 | 111 | 2 | 5 | 0 | 3.3e-13 | 4.7e-15 |
| 507 | 239.5  | 0.01793   | 113 | 57 | 113 | 2 | 5 | 0 | 3.1e-13 | 4.6e-15 |
| -   | 239.5  | - out     |     |    |     |   |   |   |         |         |
| 508 | 239.51 | 0.01793   | 115 | 58 | 115 | 2 | 5 | 0 | 3e-13   | 3.7e-15 |
| -   | 239.53 | - out     |     |    |     |   |   |   |         |         |
| 509 | 239.53 | 0.01793   | 117 | 59 | 117 | 2 | 5 | 0 | 1.7e-13 | 4.1e-15 |
| 510 | 239.55 | 0.01793   | 119 | 60 | 119 | 2 | 5 | 0 | 1.4e-13 | 4.3e-15 |
| -   | 239.55 | - out     |     |    |     |   |   |   |         |         |
| 511 | 239.57 | 0.01793   | 121 | 61 | 121 | 2 | 5 | 0 | 3.4e-13 | 3.8e-15 |
| -   | 239.58 | - out     |     |    |     |   |   |   |         |         |
| 512 | 239.58 | 0.01793   | 123 | 62 | 123 | 2 | 5 | 0 | 3.4e-13 | 3.8e-15 |

|     |        |          |     |    |     |   |   |   |         |         |
|-----|--------|----------|-----|----|-----|---|---|---|---------|---------|
| 513 | 239.6  | 0.01793  | 125 | 63 | 125 | 2 | 5 | 0 | 9.3e-14 | 3.6e-15 |
| -   | 239.61 | - out    |     |    |     |   |   |   |         |         |
| 514 | 239.62 | 0.01793  | 127 | 64 | 127 | 2 | 5 | 0 | 2.8e-13 | 3.7e-15 |
| -   | 239.64 | - out    |     |    |     |   |   |   |         |         |
| 515 | 239.64 | 0.01793  | 129 | 65 | 129 | 2 | 5 | 0 | 3.3e-13 | 3.3e-15 |
| -   | 239.66 | - out    |     |    |     |   |   |   |         |         |
| 516 | 239.67 | 0.035859 | 131 | 66 | 131 | 2 | 5 | 0 | 5.8e-13 | 3.9e-15 |
| -   | 239.69 | - out    |     |    |     |   |   |   |         |         |
| 517 | 239.71 | 0.035859 | 133 | 67 | 133 | 2 | 5 | 0 | 3.8e-13 | 4.9e-15 |
| -   | 239.72 | - out    |     |    |     |   |   |   |         |         |
| -   | 239.75 | - out    |     |    |     |   |   |   |         |         |
| 518 | 239.75 | 0.035859 | 135 | 68 | 135 | 2 | 5 | 0 | 8.3e-14 | 4.9e-15 |
| -   | 239.77 | - out    |     |    |     |   |   |   |         |         |
| 519 | 239.78 | 0.035859 | 137 | 69 | 137 | 2 | 5 | 0 | 3.4e-13 | 4.1e-15 |
| -   | 239.8  | - out    |     |    |     |   |   |   |         |         |
| 520 | 239.82 | 0.035859 | 139 | 70 | 139 | 2 | 5 | 0 | 3.4e-13 | 5e-15   |
| -   | 239.83 | - out    |     |    |     |   |   |   |         |         |
| 521 | 239.85 | 0.035859 | 141 | 71 | 141 | 2 | 5 | 0 | 1.4e-13 | 4.5e-15 |
| -   | 239.86 | - out    |     |    |     |   |   |   |         |         |
| -   | 239.88 | - out    |     |    |     |   |   |   |         |         |
| -   | 239.91 | - out    |     |    |     |   |   |   |         |         |
| 522 | 239.93 | 0.071718 | 143 | 72 | 143 | 2 | 5 | 0 | 1.7e-12 | 4.6e-15 |
| -   | 239.94 | - out    |     |    |     |   |   |   |         |         |
| -   | 239.97 | - out    |     |    |     |   |   |   |         |         |
| -   | 239.99 | - out    |     |    |     |   |   |   |         |         |
| 523 | 240    | 0.071718 | 145 | 73 | 145 | 2 | 5 | 0 | 3.3e-13 | 5.5e-15 |
| -   | 240.02 | - out    |     |    |     |   |   |   |         |         |
| -   | 240.05 | - out    |     |    |     |   |   |   |         |         |
| 524 | 240.06 | 0.064546 | 147 | 74 | 147 | 2 | 5 | 0 | 1.1e-12 | 6e-15   |
| -   | 240.08 | - out    |     |    |     |   |   |   |         |         |
| -   | 240.1  | - out    |     |    |     |   |   |   |         |         |
| 525 | 240.12 | 0.058092 | 149 | 75 | 149 | 2 | 5 | 0 | 2.2e-12 | 6.3e-15 |
| -   | 240.13 | - out    |     |    |     |   |   |   |         |         |
| -   | 240.16 | - out    |     |    |     |   |   |   |         |         |
| 526 | 240.18 | 0.058092 | 151 | 76 | 151 | 1 | 5 | 0 | 4.4e-13 | 5.1e-15 |
| -   | 240.19 | - out    |     |    |     |   |   |   |         |         |
| -   | 240.21 | - out    |     |    |     |   |   |   |         |         |
| 527 | 240.24 | 0.058092 | 153 | 77 | 153 | 1 | 5 | 0 | 6.5e-14 | 6.4e-15 |
| -   | 240.24 | - out    |     |    |     |   |   |   |         |         |
| -   | 240.27 | - out    |     |    |     |   |   |   |         |         |
| 528 | 240.28 | 0.048992 | 155 | 78 | 155 | 1 | 5 | 0 | 1.6e-12 | 6.5e-15 |
| -   | 240.3  | - out    |     |    |     |   |   |   |         |         |
| -   | 240.32 | - out    |     |    |     |   |   |   |         |         |
| 529 | 240.33 | 0.04124  | 157 | 79 | 157 | 1 | 5 | 0 | 1.7e-13 | 6.6e-15 |
| -   | 240.35 | - out    |     |    |     |   |   |   |         |         |
| 530 | 240.36 | 0.037116 | 159 | 80 | 159 | 1 | 5 | 0 | 2.3e-13 | 6.5e-15 |
| -   | 240.36 | - out    |     |    |     |   |   |   |         |         |
| 531 | 240.4  | 0.033404 | 161 | 81 | 161 | 1 | 5 | 0 | 2.1e-12 | 6.8e-15 |

Number of vertex elements: 3  
 Number of boundary elements: 112  
 Number of vertex elements: 3  
 Number of boundary elements: 112  
 Number of elements: 534  
 Minimum element quality: 0.5661  
 Number of vertex elements: 4  
 Number of boundary elements: 162

Number of vertex elements: 5  
 Number of boundary elements: 212  
 Number of vertex elements: 6  
 Number of boundary elements: 266  
 Minimum element quality: 0.1707  
 Geometry shape function: Linear Lagrange  
 Time interval 10  
 Time-dependent solver (BDF)  
 Number of degrees of freedom solved for: 11758 (plus 7124 internal DOFs).  
 Nonsymmetric matrix found.  
 Scales for dependent variables:  
 Concentration (compl.cOx): 45  
 Concentration (compl.cRed): 31  
 Spatial mesh displacement (compl.spatial.disp): 2.4e-07

| Step | Time   | Stepsize | Res | Jac | Sol | Order | Tfail | NLfail | LinErr  | LinRes  |
|------|--------|----------|-----|-----|-----|-------|-------|--------|---------|---------|
| -    | 240.36 | - out    |     |     |     |       |       |        |         |         |
| -    | 240.38 | - out    |     |     |     |       |       |        |         |         |
| 532  | 240.39 | 0.0275   | 2   | 2   | 2   | 1     | 0     | 0      | 3.6e-13 | 5.4e-15 |
| -    | 240.41 | - out    |     |     |     |       |       |        |         |         |
| 533  | 240.42 | 0.0275   | 4   | 3   | 4   | 1     | 0     | 0      | 2.2e-13 | 6.6e-15 |
| -    | 240.43 | - out    |     |     |     |       |       |        |         |         |
| -    | 240.46 | - out    |     |     |     |       |       |        |         |         |
| 534  | 240.47 | 0.055    | 6   | 4   | 6   | 2     | 0     | 0      | 1.2e-12 | 6.9e-15 |
| -    | 240.49 | - out    |     |     |     |       |       |        |         |         |
| -    | 240.52 | - out    |     |     |     |       |       |        |         |         |
| 535  | 240.53 | 0.055    | 8   | 5   | 8   | 2     | 0     | 0      | 3.6e-12 | 9.4e-15 |
| -    | 240.54 | - out    |     |     |     |       |       |        |         |         |
| -    | 240.57 | - out    |     |     |     |       |       |        |         |         |
| 536  | 240.58 | 0.055    | 10  | 6   | 10  | 2     | 0     | 0      | 5.2e-13 | 9.3e-15 |
| -    | 240.6  | - out    |     |     |     |       |       |        |         |         |
| -    | 240.63 | - out    |     |     |     |       |       |        |         |         |
| 537  | 240.64 | 0.055    | 12  | 7   | 12  | 2     | 0     | 0      | 2.7e-12 | 9.3e-15 |
| -    | 240.65 | - out    |     |     |     |       |       |        |         |         |
| -    | 240.68 | - out    |     |     |     |       |       |        |         |         |
| 538  | 240.69 | 0.055    | 14  | 8   | 14  | 2     | 0     | 0      | 4.2e-12 | 9.5e-15 |
| -    | 240.71 | - out    |     |     |     |       |       |        |         |         |
| -    | 240.74 | - out    |     |     |     |       |       |        |         |         |
| 539  | 240.75 | 0.055    | 16  | 9   | 16  | 2     | 0     | 0      | 5.2e-12 | 1e-14   |
| -    | 240.76 | - out    |     |     |     |       |       |        |         |         |
| -    | 240.79 | - out    |     |     |     |       |       |        |         |         |
| 540  | 240.8  | 0.055    | 18  | 10  | 18  | 2     | 0     | 0      | 3.5e-12 | 9.6e-15 |
| -    | 240.82 | - out    |     |     |     |       |       |        |         |         |
| -    | 240.85 | - out    |     |     |     |       |       |        |         |         |
| 541  | 240.86 | 0.055    | 20  | 11  | 20  | 2     | 0     | 0      | 6.4e-12 | 1e-14   |
| -    | 240.87 | - out    |     |     |     |       |       |        |         |         |
| -    | 240.9  | - out    |     |     |     |       |       |        |         |         |
| 542  | 240.91 | 0.055    | 22  | 12  | 22  | 2     | 0     | 0      | 5.5e-12 | 1.2e-14 |
| -    | 240.93 | - out    |     |     |     |       |       |        |         |         |
| -    | 240.96 | - out    |     |     |     |       |       |        |         |         |
| 543  | 240.97 | 0.055    | 24  | 13  | 24  | 2     | 0     | 0      | 2.2e-12 | 1.3e-14 |
| -    | 240.98 | - out    |     |     |     |       |       |        |         |         |
| -    | 241.01 | - out    |     |     |     |       |       |        |         |         |
| 544  | 241.02 | 0.055    | 26  | 14  | 26  | 2     | 0     | 0      | 1.3e-11 | 1.5e-14 |
| -    | 241.04 | - out    |     |     |     |       |       |        |         |         |
| -    | 241.07 | - out    |     |     |     |       |       |        |         |         |
| 545  | 241.08 | 0.055    | 28  | 15  | 28  | 2     | 0     | 0      | 9.2e-12 | 1.8e-14 |

|     |        |       |    |    |    |   |   |   |         |         |  |
|-----|--------|-------|----|----|----|---|---|---|---------|---------|--|
| -   | 241.09 | - out |    |    |    |   |   |   |         |         |  |
| -   | 241.12 | - out |    |    |    |   |   |   |         |         |  |
| 546 | 241.13 | 0.055 | 30 | 16 | 30 | 2 | 0 | 0 | 1.1e-11 | 2.2e-14 |  |
| -   | 241.15 | - out |    |    |    |   |   |   |         |         |  |
| -   | 241.18 | - out |    |    |    |   |   |   |         |         |  |
| 547 | 241.19 | 0.055 | 32 | 17 | 32 | 2 | 0 | 0 | 1.9e-11 | 2.7e-14 |  |
| -   | 241.2  | - out |    |    |    |   |   |   |         |         |  |
| -   | 241.23 | - out |    |    |    |   |   |   |         |         |  |
| 548 | 241.24 | 0.055 | 34 | 18 | 34 | 2 | 0 | 0 | 1.1e-11 | 3.8e-14 |  |
| -   | 241.26 | - out |    |    |    |   |   |   |         |         |  |
| -   | 241.29 | - out |    |    |    |   |   |   |         |         |  |
| 549 | 241.3  | 0.055 | 36 | 19 | 36 | 2 | 0 | 0 | 2.5e-11 | 5e-14   |  |
| -   | 241.31 | - out |    |    |    |   |   |   |         |         |  |
| -   | 241.34 | - out |    |    |    |   |   |   |         |         |  |
| 550 | 241.35 | 0.055 | 38 | 20 | 38 | 2 | 0 | 0 | 1.3e-11 | 6.7e-14 |  |
| -   | 241.37 | - out |    |    |    |   |   |   |         |         |  |
| -   | 241.4  | - out |    |    |    |   |   |   |         |         |  |
| 551 | 241.41 | 0.055 | 40 | 21 | 40 | 2 | 0 | 0 | 2.8e-11 | 1e-13   |  |
| -   | 241.41 | - out |    |    |    |   |   |   |         |         |  |
| 552 | 241.46 | 0.055 | 42 | 22 | 42 | 2 | 0 | 0 | 4.2e-11 | 1.3e-13 |  |

Number of vertex elements: 3  
 Number of boundary elements: 112  
 Number of vertex elements: 3  
 Number of boundary elements: 112  
 Number of elements: 534  
 Minimum element quality: 0.5661  
 Number of vertex elements: 4  
 Number of boundary elements: 162  
 Number of vertex elements: 5  
 Number of boundary elements: 212  
 Number of vertex elements: 6  
 Number of boundary elements: 266  
 Minimum element quality: 0.04508  
 Geometry shape function: Linear Lagrange

Time interval 11  
 Time-dependent solver (BDF)  
 Number of degrees of freedom solved for: 11758 (plus 7124 internal DOFs).

Nonsymmetric matrix found.  
 Scales for dependent variables:  
 Concentration (compl.cOx): 69  
 Concentration (compl.cRed): 19

Spatial mesh displacement (compl.spatial.disp): 2.4e-07

| Step | Time   | Stepsize | Res | Jac | Sol | Order | Tfail | NLfail | LinErr  | LinRes  |
|------|--------|----------|-----|-----|-----|-------|-------|--------|---------|---------|
| -    | 241.41 | - out    |     |     |     |       |       |        |         |         |
| -    | 241.42 | - out    |     |     |     |       |       |        |         |         |
| 553  | 241.44 | 0.0275   | 2   | 2   | 2   | 1     | 0     | 0      | 2.6e-11 | 2.3e-13 |
| -    | 241.45 | - out    |     |     |     |       |       |        |         |         |
| 554  | 241.46 | 0.0275   | 4   | 3   | 4   | 1     | 0     | 0      | 2.7e-11 | 2.5e-13 |
| -    | 241.48 | - out    |     |     |     |       |       |        |         |         |
| -    | 241.51 | - out    |     |     |     |       |       |        |         |         |
| 555  | 241.52 | 0.055    | 6   | 4   | 6   | 2     | 0     | 0      | 5.6e-11 | 1.6e-13 |
| -    | 241.53 | - out    |     |     |     |       |       |        |         |         |
| -    | 241.56 | - out    |     |     |     |       |       |        |         |         |
| 556  | 241.57 | 0.055    | 8   | 5   | 8   | 2     | 0     | 0      | 1.2e-10 | 4.7e-13 |
| -    | 241.57 | - out    |     |     |     |       |       |        |         |         |
| 557  | 241.59 | 0.01375  | 11  | 6   | 10  | 2     | 0     | 1      | 1.4e-11 | 2.2e-13 |

Number of vertex elements: 3  
 Number of boundary elements: 112  
 Number of vertex elements: 3  
 Number of boundary elements: 112  
 Number of elements: 534  
 Minimum element quality: 0.5661  
 Number of vertex elements: 4  
 Number of boundary elements: 162  
 Number of vertex elements: 5  
 Number of boundary elements: 212  
 Number of vertex elements: 6  
 Number of boundary elements: 266  
 Minimum element quality: 0.0002336  
 Geometry shape function: Linear Lagrange  
 Time interval 12  
 Time-dependent solver (BDF)  
 Number of degrees of freedom solved for: 11758 (plus 7124 internal DOFs).  
 Nonsymmetric matrix found.  
 Scales for dependent variables:  
 Concentration (compl.cOx): 97  
 Concentration (compl.cRed): 23  
 Spatial mesh displacement (compl.spatial.disp): 2.4e-07  

| Step | Time   | Stepsize  | Res | Jac | Sol | Order | Tfail | NLfail | LinErr  | LinRes  |
|------|--------|-----------|-----|-----|-----|-------|-------|--------|---------|---------|
| -    | 241.57 | -         | out |     |     |       |       |        |         |         |
| -    | 241.59 | -         | out |     |     |       |       |        |         |         |
| 558  | 241.6  | 0.0275    | 2   | 2   | 2   | 1     | 0     | 0      | 9.7e-11 | 3.9e-13 |
| 559  | 241.61 | 0.006875  | 5   | 3   | 4   | 1     | 0     | 1      | 6.9e-11 | 2.7e-13 |
| -    | 241.61 | -         | out |     |     |       |       |        |         |         |
| 560  | 241.61 | 0.0059813 | 8   | 4   | 5   | 1     | 0     | 3      | 7.3e-11 | 3.7e-13 |

 Number of vertex elements: 3  
 Number of boundary elements: 112  
 Number of vertex elements: 3  
 Number of boundary elements: 112  
 Number of elements: 534  
 Minimum element quality: 0.5661  
 Number of vertex elements: 4  
 Number of boundary elements: 162  
 Number of vertex elements: 5  
 Number of boundary elements: 212  
 Number of vertex elements: 6  
 Number of boundary elements: 266  
 Minimum element quality: 0.5661  
 Solution time: 494 s. (8 minutes, 14 seconds)  
 Physical memory: 2.6 GB  
 Virtual memory: 2.8 GB  
 Ended at Jun 21, 2023 12:26:44 PM.  
 ----- Time-Dependent Solver 1 in Study 2 (CV 40 to 44)/Solution 4 (sol4) ----->

### Advanced (aDef)

#### ASSEMBLY SETTINGS

| Description            | Value |
|------------------------|-------|
| Reuse sparsity pattern | On    |

## Fully Coupled 1 (fc1)

### GENERAL

| Description   | Value                    |
|---------------|--------------------------|
| Linear solver | <a href="#">Direct 1</a> |

### METHOD AND TERMINATION

| Description                    | Value                 |
|--------------------------------|-----------------------|
| Damping factor                 | 0.9                   |
| Jacobian update                | Once per time step    |
| Maximum number of iterations   | 8                     |
| Stabilization and acceleration | Anderson acceleration |
| Dimension of iteration space   | 5                     |

## Automatic Remeshing 1 (ar1)

### GENERAL

| Description        | Value                      |
|--------------------|----------------------------|
| Remesh in geometry | <a href="#">Geometry 1</a> |

### CONDITION FOR REMESHING

| Description                  | Value      |
|------------------------------|------------|
| Condition type               | Distortion |
| Stop when distortion exceeds | 1.5        |

### OUTPUT

| Description | Value                                                                                            |
|-------------|--------------------------------------------------------------------------------------------------|
| Solution    | <a href="#">Remeshed Solution 2</a>                                                              |
| Meshes      | {mesh11, mesh12, mesh13, mesh14, mesh15, mesh16, mesh17, mesh18, mesh19, mesh20, mesh21, mesh22} |

## 5 Study 3 (CV 21 to 30)

### COMPUTATION INFORMATION

|                  |             |
|------------------|-------------|
| Computation time | 11 min 46 s |
|------------------|-------------|

### 5.1 TIME DEPENDENT

| Times                               | Unit |
|-------------------------------------|------|
| range(20*t_cv,t_tot/nb/200,30*t_cv) | s    |

### STUDY SETTINGS

| Description                    | Value |
|--------------------------------|-------|
| Include geometric nonlinearity | Off   |

### STUDY SETTINGS

| Description  | Value                                                                                                                                                                                                                                                                                                                                                                                                                                                                                                                                                                                                                                                                                                                                                                                                                                                                                                                                                                                                                                                                                                                                                                                                                                                                                                                                                                                                                                                                                                                                                                                                                                                                                                                                                                                                                                                                                                                                |
|--------------|--------------------------------------------------------------------------------------------------------------------------------------------------------------------------------------------------------------------------------------------------------------------------------------------------------------------------------------------------------------------------------------------------------------------------------------------------------------------------------------------------------------------------------------------------------------------------------------------------------------------------------------------------------------------------------------------------------------------------------------------------------------------------------------------------------------------------------------------------------------------------------------------------------------------------------------------------------------------------------------------------------------------------------------------------------------------------------------------------------------------------------------------------------------------------------------------------------------------------------------------------------------------------------------------------------------------------------------------------------------------------------------------------------------------------------------------------------------------------------------------------------------------------------------------------------------------------------------------------------------------------------------------------------------------------------------------------------------------------------------------------------------------------------------------------------------------------------------------------------------------------------------------------------------------------------------|
| Output times | {110.00000000000001, 110.02750000000002, 110.05500000000002, 110.08250000000001, 110.11000000000001, 110.13750000000002, 110.16500000000002, 110.19250000000001, 110.22000000000001, 110.24750000000002, 110.27500000000002, 110.30250000000001, 110.33000000000001, 110.35750000000002, 110.38500000000002, 110.41250000000001, 110.44000000000001, 110.46750000000002, 110.49500000000002, 110.52250000000001, 110.55000000000001, 110.57750000000001, 110.60500000000002, 110.63250000000001, 110.66000000000001, 110.68750000000001, 110.71500000000002, 110.74250000000002, 110.77000000000001, 110.79750000000001, 110.82500000000002, 110.85250000000002, 110.88000000000001, 110.90750000000001, 110.93500000000002, 110.96250000000002, 110.99000000000001, 111.01750000000001, 111.04500000000002, 111.07250000000002, 111.10000000000001, 111.12750000000001, 111.15500000000002, 111.18250000000002, 111.21000000000001, 111.23750000000001, 111.26500000000001, 111.29250000000002, 111.32000000000002, 111.34750000000001, 111.37500000000001, 111.40250000000002, 111.43000000000002, 111.45750000000001, 111.48500000000001, 111.51250000000002, 111.54000000000002, 111.56750000000001, 111.59500000000001, 111.62250000000002, 111.65000000000002, 111.67750000000001, 111.70500000000001, 111.73250000000002, 111.76000000000002, 111.78750000000001, 111.81500000000001, 111.84250000000002, 111.87000000000002, 111.89750000000001, 111.92500000000001, 111.95250000000001, 111.98000000000002, 112.00750000000002, 112.03500000000001, 112.06250000000001, 112.09000000000002, 112.11750000000002, 112.14500000000001, 112.17250000000001, 112.20000000000002, 112.22750000000002, 112.25500000000001, 112.28250000000001, 112.31000000000002, 112.33750000000002, 112.36500000000001, 112.39250000000001, 112.42000000000002, 112.44750000000002, 112.47500000000001, 112.50250000000001, 112.53000000000002, |



| Description | Value                                                                                                                                                                                                                                                                                                                                                                                                                                                                                                                                                                                                                                                                                                                                                                                                                                                                                                                                                                                                                                                                                                                                                                                                                                                                                                                                                                                                                                                                                                                                                                                                                                                                                                                                                                                                                                                                                                                                                                                                                                                                                                                                                                                                                                                                                                                                                                                                                                                                                                                                                                                                                                                                                                                                                                                                                                                                                                                                                                                           |
|-------------|-------------------------------------------------------------------------------------------------------------------------------------------------------------------------------------------------------------------------------------------------------------------------------------------------------------------------------------------------------------------------------------------------------------------------------------------------------------------------------------------------------------------------------------------------------------------------------------------------------------------------------------------------------------------------------------------------------------------------------------------------------------------------------------------------------------------------------------------------------------------------------------------------------------------------------------------------------------------------------------------------------------------------------------------------------------------------------------------------------------------------------------------------------------------------------------------------------------------------------------------------------------------------------------------------------------------------------------------------------------------------------------------------------------------------------------------------------------------------------------------------------------------------------------------------------------------------------------------------------------------------------------------------------------------------------------------------------------------------------------------------------------------------------------------------------------------------------------------------------------------------------------------------------------------------------------------------------------------------------------------------------------------------------------------------------------------------------------------------------------------------------------------------------------------------------------------------------------------------------------------------------------------------------------------------------------------------------------------------------------------------------------------------------------------------------------------------------------------------------------------------------------------------------------------------------------------------------------------------------------------------------------------------------------------------------------------------------------------------------------------------------------------------------------------------------------------------------------------------------------------------------------------------------------------------------------------------------------------------------------------------|
|             | 112.55750000000002, 112.58500000000001, 112.61250000000001, 112.64000000000001, 112.66750000000002, 112.69500000000002, 112.72250000000001, 112.75000000000001, 112.77750000000002, 112.80500000000002, 112.83250000000001, 112.86000000000001, 112.88750000000002, 112.91500000000002, 112.94250000000001, 112.97000000000001, 112.99750000000002, 113.02500000000002, 113.05250000000001, 113.08000000000001, 113.10750000000002, 113.13500000000002, 113.16250000000001, 113.19000000000001, 113.21750000000002, 113.24500000000002, 113.27250000000001, 113.30000000000001, 113.32750000000001, 113.35500000000002, 113.38250000000002, 113.41000000000001, 113.43750000000001, 113.46500000000002, 113.49250000000002, 113.52000000000001, 113.54750000000001, 113.57500000000002, 113.60250000000002, 113.63000000000001, 113.65750000000001, 113.68500000000002, 113.71250000000002, 113.74000000000001, 113.76750000000001, 113.79500000000002, 113.82250000000002, 113.85000000000001, 113.87750000000001, 113.90500000000002, 113.93250000000002, 113.96000000000001, 113.98750000000001, 114.01500000000001, 114.04250000000002, 114.07000000000002, 114.09750000000001, 114.12500000000001, 114.15250000000002, 114.18000000000002, 114.20750000000001, 114.23500000000001, 114.26250000000002, 114.29000000000002, 114.31750000000001, 114.34500000000001, 114.37250000000002, 114.40000000000002, 114.42750000000001, 114.45500000000001, 114.48250000000002, 114.51000000000002, 114.53750000000001, 114.56500000000001, 114.59250000000002, 114.62000000000002, 114.64750000000001, 114.67500000000001, 114.70250000000001, 114.73000000000002, 114.75750000000002, 114.78500000000001, 114.81250000000001, 114.84000000000002, 114.86750000000002, 114.89500000000001, 114.92250000000001, 114.95000000000002, 114.97750000000002, 115.00500000000001, 115.03250000000001, 115.06000000000002, 115.08750000000002, 115.11500000000001, 115.14250000000001, 115.17000000000002, 115.19750000000002, 115.22500000000001, 115.25250000000001, 115.28000000000002, 115.30750000000002, 115.33500000000001, 115.36250000000001, 115.39000000000001, 115.41750000000002, 115.44500000000002, 115.47250000000001, 115.50000000000001, 115.52750000000002, 115.55500000000002, 115.58250000000001, 115.61000000000001, 115.63750000000002, 115.66500000000002, 115.69250000000001, 115.72000000000001, 115.74750000000002, 115.77500000000002, 115.80250000000001, 115.83000000000001, 115.85750000000002, 115.88500000000002, 115.91250000000001, 115.94000000000001, 115.96750000000002, 115.99500000000002, 116.02250000000001, 116.05000000000001, 116.07750000000001, 116.10500000000002, 116.13250000000002, 116.16000000000001, 116.18750000000001, 116.21500000000002, 116.24250000000002, 116.27000000000001, 116.29750000000001, 116.32500000000002, 116.35250000000002, 116.38000000000001, 116.40750000000001, 116.43500000000002, 116.46250000000002, 116.49000000000001, |

| Description | Value                                                                                                                                                                                                                                                                                                                                                                                                                                                                                                                                                                                                                                                                                                                                                                                                                                                                                                                                                                                                                                                                                                                                                                                                                                                                                                                                                                                                                                                                                                                                                                                                                                                                                                                                                                                                                                                                                                                                                                                                                                                                                                                                                                                                                                                                                                                                                                                                                                                                                                                                                                                                                                                                                                                                                                                                                                                                                                                                                                                                                                                                                                                                        |
|-------------|----------------------------------------------------------------------------------------------------------------------------------------------------------------------------------------------------------------------------------------------------------------------------------------------------------------------------------------------------------------------------------------------------------------------------------------------------------------------------------------------------------------------------------------------------------------------------------------------------------------------------------------------------------------------------------------------------------------------------------------------------------------------------------------------------------------------------------------------------------------------------------------------------------------------------------------------------------------------------------------------------------------------------------------------------------------------------------------------------------------------------------------------------------------------------------------------------------------------------------------------------------------------------------------------------------------------------------------------------------------------------------------------------------------------------------------------------------------------------------------------------------------------------------------------------------------------------------------------------------------------------------------------------------------------------------------------------------------------------------------------------------------------------------------------------------------------------------------------------------------------------------------------------------------------------------------------------------------------------------------------------------------------------------------------------------------------------------------------------------------------------------------------------------------------------------------------------------------------------------------------------------------------------------------------------------------------------------------------------------------------------------------------------------------------------------------------------------------------------------------------------------------------------------------------------------------------------------------------------------------------------------------------------------------------------------------------------------------------------------------------------------------------------------------------------------------------------------------------------------------------------------------------------------------------------------------------------------------------------------------------------------------------------------------------------------------------------------------------------------------------------------------------|
|             | 116.51750000000001, 116.54500000000002, 116.57250000000002,<br>116.60000000000001, 116.62750000000001, 116.65500000000002,<br>116.68250000000002, 116.71000000000001, 116.73750000000001,<br>116.76500000000001, 116.79250000000002, 116.82000000000002,<br>116.84750000000001, 116.87500000000001, 116.90250000000002,<br>116.93000000000002, 116.95750000000001, 116.98500000000001,<br>117.01250000000002, 117.04000000000002, 117.06750000000001,<br>117.09500000000001, 117.12250000000002, 117.15000000000002,<br>117.17750000000001, 117.20500000000001, 117.23250000000002,<br>117.26000000000002, 117.28750000000001, 117.31500000000001,<br>117.34250000000002, 117.37000000000002, 117.39750000000001,<br>117.42500000000001, 117.45250000000001, 117.48000000000002,<br>117.50750000000002, 117.53500000000001, 117.56250000000001,<br>117.59000000000002, 117.61750000000002, 117.64500000000001,<br>117.67250000000001, 117.70000000000002, 117.72750000000002,<br>117.75500000000001, 117.78250000000001, 117.81000000000002,<br>117.83750000000002, 117.86500000000001, 117.89250000000001,<br>117.92000000000002, 117.94750000000002, 117.97500000000002,<br>118.00250000000001, 118.03000000000002, 118.05750000000002,<br>118.08500000000001, 118.11250000000001, 118.14000000000001,<br>118.16750000000002, 118.19500000000002, 118.22250000000001,<br>118.25000000000001, 118.27750000000002, 118.30500000000002,<br>118.33250000000001, 118.36000000000001, 118.38750000000002,<br>118.41500000000002, 118.44250000000001, 118.47000000000001,<br>118.49750000000002, 118.52500000000002, 118.55250000000001,<br>118.58000000000001, 118.60750000000002, 118.63500000000002,<br>118.66250000000002, 118.69000000000001, 118.71750000000002,<br>118.74500000000002, 118.77250000000001, 118.80000000000001,<br>118.82750000000001, 118.85500000000002, 118.88250000000002,<br>118.91000000000001, 118.93750000000001, 118.96500000000002,<br>118.99250000000002, 119.02000000000001, 119.04750000000001,<br>119.07500000000002, 119.10250000000002, 119.13000000000001,<br>119.15750000000001, 119.18500000000002, 119.21250000000002,<br>119.24000000000001, 119.26750000000001, 119.29500000000002,<br>119.32250000000002, 119.35000000000002, 119.37750000000001,<br>119.40500000000002, 119.43250000000002, 119.46000000000001,<br>119.48750000000001, 119.51500000000001, 119.54250000000002,<br>119.57000000000002, 119.59750000000001, 119.62500000000001,<br>119.65250000000002, 119.68000000000002, 119.70750000000001,<br>119.73500000000001, 119.76250000000002, 119.79000000000002,<br>119.81750000000001, 119.84500000000001, 119.87250000000002,<br>119.90000000000002, 119.92750000000001, 119.95500000000001,<br>119.98250000000002, 120.01000000000002, 120.03750000000002,<br>120.06500000000001, 120.09250000000002, 120.12000000000002,<br>120.14750000000001, 120.17500000000001, 120.20250000000001,<br>120.23000000000002, 120.25750000000002, 120.28500000000001,<br>120.31250000000001, 120.34000000000002, 120.36750000000002,<br>120.39500000000001, 120.42250000000001, 120.45000000000002, |

| Description | Value                                                                                                                                                                                                                                                                                                                                                                                                                                                                                                                                                                                                                                                                                                                                                                                                                                                                                                                                                                                                                                                                                                                                                                                                                                                                                                                                                                                                                                                                                                                                                                                                                                                                                                                                                                                                                                                                                                                                                                                                                                                                                                                                                                                                                                                                                                                                                                                                                                                                                                                                                                                                                                                                                                                                                                                                                                                                                                                                                                                           |
|-------------|-------------------------------------------------------------------------------------------------------------------------------------------------------------------------------------------------------------------------------------------------------------------------------------------------------------------------------------------------------------------------------------------------------------------------------------------------------------------------------------------------------------------------------------------------------------------------------------------------------------------------------------------------------------------------------------------------------------------------------------------------------------------------------------------------------------------------------------------------------------------------------------------------------------------------------------------------------------------------------------------------------------------------------------------------------------------------------------------------------------------------------------------------------------------------------------------------------------------------------------------------------------------------------------------------------------------------------------------------------------------------------------------------------------------------------------------------------------------------------------------------------------------------------------------------------------------------------------------------------------------------------------------------------------------------------------------------------------------------------------------------------------------------------------------------------------------------------------------------------------------------------------------------------------------------------------------------------------------------------------------------------------------------------------------------------------------------------------------------------------------------------------------------------------------------------------------------------------------------------------------------------------------------------------------------------------------------------------------------------------------------------------------------------------------------------------------------------------------------------------------------------------------------------------------------------------------------------------------------------------------------------------------------------------------------------------------------------------------------------------------------------------------------------------------------------------------------------------------------------------------------------------------------------------------------------------------------------------------------------------------------|
|             | 120.47750000000002, 120.50500000000001, 120.53250000000001, 120.56000000000002, 120.58750000000002, 120.61500000000001, 120.64250000000001, 120.67000000000002, 120.69750000000002, 120.72500000000002, 120.75250000000001, 120.78000000000002, 120.80750000000002, 120.83500000000001, 120.86250000000001, 120.89000000000001, 120.91750000000002, 120.94500000000002, 120.97250000000001, 121.00000000000001, 121.02750000000002, 121.05500000000002, 121.08250000000001, 121.11000000000001, 121.13750000000002, 121.16500000000002, 121.19250000000001, 121.22000000000001, 121.24750000000002, 121.27500000000002, 121.30250000000001, 121.33000000000001, 121.35750000000002, 121.38500000000002, 121.41250000000002, 121.44000000000001, 121.46750000000002, 121.49500000000002, 121.52250000000001, 121.55000000000001, 121.57750000000001, 121.60500000000002, 121.63250000000002, 121.66000000000001, 121.68750000000001, 121.71500000000002, 121.74250000000002, 121.77000000000001, 121.79750000000001, 121.82500000000002, 121.85250000000002, 121.88000000000001, 121.90750000000001, 121.93500000000002, 121.96250000000002, 121.99000000000001, 122.01750000000001, 122.04500000000002, 122.07250000000002, 122.10000000000002, 122.12750000000001, 122.15500000000002, 122.18250000000002, 122.21000000000001, 122.23750000000001, 122.26500000000001, 122.29250000000002, 122.32000000000002, 122.34750000000001, 122.37500000000001, 122.40250000000002, 122.43000000000002, 122.45750000000001, 122.48500000000001, 122.51250000000002, 122.54000000000002, 122.56750000000001, 122.59500000000001, 122.62250000000002, 122.65000000000002, 122.67750000000001, 122.70500000000001, 122.73250000000002, 122.76000000000002, 122.78750000000002, 122.81500000000001, 122.84250000000002, 122.87000000000002, 122.89750000000001, 122.92500000000001, 122.95250000000001, 122.98000000000002, 123.00750000000002, 123.03500000000001, 123.06250000000001, 123.09000000000002, 123.11750000000002, 123.14500000000001, 123.17250000000001, 123.20000000000002, 123.22750000000002, 123.25500000000002, 123.28250000000001, 123.31000000000002, 123.33750000000002, 123.36500000000001, 123.39250000000001, 123.42000000000002, 123.44750000000002, 123.47500000000002, 123.50250000000001, 123.53000000000002, 123.55750000000002, 123.58500000000002, 123.61250000000001, 123.64000000000001, 123.66750000000002, 123.69500000000002, 123.72250000000001, 123.75000000000001, 123.77750000000002, 123.80500000000002, 123.83250000000001, 123.86000000000001, 123.88750000000002, 123.91500000000002, 123.94250000000002, 123.97000000000001, 123.99750000000002, 124.02500000000002, 124.05250000000001, 124.08000000000001, 124.10750000000002, 124.13500000000002, 124.16250000000002, 124.19000000000001, 124.21750000000002, 124.24500000000002, 124.27250000000002, 124.30000000000001, 124.32750000000001, 124.35500000000002, 124.38250000000002, 124.41000000000001, |

| Description | Value                                                                                                                                                                                                                                                                                                                                                                                                                                                                                                                                                                                                                                                                                                                                                                                                                                                                                                                                                                                                                                                                                                                                                                                                                                                                                                                                                                                                                                                                                                                                                                                                                                                                                                                                                                                                                                                                                                                                                                                                                                                                                                                                                                                                                                                                                                                                                                                                                                                                                                                                                                                                                                                                                                                                                                                                                                                                                                                                                                                                                   |
|-------------|-------------------------------------------------------------------------------------------------------------------------------------------------------------------------------------------------------------------------------------------------------------------------------------------------------------------------------------------------------------------------------------------------------------------------------------------------------------------------------------------------------------------------------------------------------------------------------------------------------------------------------------------------------------------------------------------------------------------------------------------------------------------------------------------------------------------------------------------------------------------------------------------------------------------------------------------------------------------------------------------------------------------------------------------------------------------------------------------------------------------------------------------------------------------------------------------------------------------------------------------------------------------------------------------------------------------------------------------------------------------------------------------------------------------------------------------------------------------------------------------------------------------------------------------------------------------------------------------------------------------------------------------------------------------------------------------------------------------------------------------------------------------------------------------------------------------------------------------------------------------------------------------------------------------------------------------------------------------------------------------------------------------------------------------------------------------------------------------------------------------------------------------------------------------------------------------------------------------------------------------------------------------------------------------------------------------------------------------------------------------------------------------------------------------------------------------------------------------------------------------------------------------------------------------------------------------------------------------------------------------------------------------------------------------------------------------------------------------------------------------------------------------------------------------------------------------------------------------------------------------------------------------------------------------------------------------------------------------------------------------------------------------------|
|             | 124.43750000000001, 124.46500000000002, 124.49250000000002, 124.52000000000001, 124.54750000000001, 124.57500000000002, 124.60250000000002, 124.63000000000002, 124.65750000000001, 124.68500000000002, 124.71250000000002, 124.74000000000001, 124.76750000000001, 124.79500000000002, 124.82250000000002, 124.85000000000002, 124.87750000000001, 124.90500000000002, 124.93250000000002, 124.96000000000002, 124.98750000000001, 125.01500000000001, 125.04250000000002, 125.07000000000002, 125.09750000000001, 125.12500000000001, 125.15250000000002, 125.18000000000002, 125.20750000000001, 125.23500000000001, 125.26250000000002, 125.29000000000002, 125.31750000000002, 125.34500000000001, 125.37250000000002, 125.40000000000002, 125.42750000000001, 125.45500000000001, 125.48250000000002, 125.51000000000002, 125.53750000000002, 125.56500000000001, 125.59250000000002, 125.62000000000002, 125.64750000000002, 125.67500000000001, 125.70250000000001, 125.73000000000002, 125.75750000000002, 125.78500000000001, 125.81250000000001, 125.84000000000002, 125.86750000000002, 125.89500000000001, 125.92250000000001, 125.95000000000002, 125.97750000000002, 126.00500000000002, 126.03250000000001, 126.06000000000002, 126.08750000000002, 126.11500000000001, 126.14250000000001, 126.17000000000002, 126.19750000000002, 126.22500000000002, 126.25250000000001, 126.28000000000002, 126.30750000000002, 126.33500000000001, 126.36250000000001, 126.39000000000001, 126.41750000000002, 126.44500000000002, 126.47250000000003, 126.50000000000001, 126.52750000000002, 126.55500000000002, 126.58250000000001, 126.61000000000001, 126.63750000000002, 126.66500000000002, 126.69250000000002, 126.72000000000001, 126.74750000000002, 126.77500000000002, 126.80250000000001, 126.83000000000001, 126.85750000000002, 126.88500000000002, 126.91250000000002, 126.94000000000001, 126.96750000000002, 126.99500000000002, 127.02250000000001, 127.05000000000001, 127.07750000000001, 127.10500000000002, 127.13250000000002, 127.16000000000003, 127.18750000000001, 127.21500000000002, 127.24250000000002, 127.27000000000001, 127.29750000000001, 127.32500000000002, 127.35250000000002, 127.38000000000002, 127.40750000000001, 127.43500000000002, 127.46250000000002, 127.49000000000001, 127.51750000000001, 127.54500000000002, 127.57250000000002, 127.60000000000002, 127.62750000000001, 127.65500000000002, 127.68250000000002, 127.71000000000001, 127.73750000000001, 127.76500000000001, 127.79250000000002, 127.82000000000002, 127.84750000000003, 127.87500000000001, 127.90250000000002, 127.93000000000002, 127.95750000000001, 127.98500000000001, 128.01250000000002, 128.04000000000002, 128.06750000000002, 128.09500000000003, 128.1225, 128.15, 128.1775, 128.205, 128.23250000000002, 128.26000000000002, 128.28750000000002, 128.31500000000003, 128.34250000000003, 128.37, 128.3975, 128.425, 128.45250000000001, 128.48000000000002, 128.50750000000002, |

| Description | Value                                                                                                                                                                                                                                                                                                                                                                                                                                                                                                                                                                                                                                                                                                                                                                                                                                                                                                                                                                                                                                                                                                                                                                                                                                                                                                                                                                                                                                                                                                                                                                                                                                                                                                                                                                                                                                                                                                                                                                                                                                                                                                                                                                                                                                                                                                                                                                                                                                                                                                                                                                                                                                                                                                                                                                                                                                                                                                                                                                                                                                                                                                                                                                                                                                                                                                                                                                                                                              |
|-------------|------------------------------------------------------------------------------------------------------------------------------------------------------------------------------------------------------------------------------------------------------------------------------------------------------------------------------------------------------------------------------------------------------------------------------------------------------------------------------------------------------------------------------------------------------------------------------------------------------------------------------------------------------------------------------------------------------------------------------------------------------------------------------------------------------------------------------------------------------------------------------------------------------------------------------------------------------------------------------------------------------------------------------------------------------------------------------------------------------------------------------------------------------------------------------------------------------------------------------------------------------------------------------------------------------------------------------------------------------------------------------------------------------------------------------------------------------------------------------------------------------------------------------------------------------------------------------------------------------------------------------------------------------------------------------------------------------------------------------------------------------------------------------------------------------------------------------------------------------------------------------------------------------------------------------------------------------------------------------------------------------------------------------------------------------------------------------------------------------------------------------------------------------------------------------------------------------------------------------------------------------------------------------------------------------------------------------------------------------------------------------------------------------------------------------------------------------------------------------------------------------------------------------------------------------------------------------------------------------------------------------------------------------------------------------------------------------------------------------------------------------------------------------------------------------------------------------------------------------------------------------------------------------------------------------------------------------------------------------------------------------------------------------------------------------------------------------------------------------------------------------------------------------------------------------------------------------------------------------------------------------------------------------------------------------------------------------------------------------------------------------------------------------------------------------------|
|             | 128.53500000000003, 128.56250000000003, 128.59000000000003, 128.6175, 128.645,<br>128.6725, 128.70000000000002, 128.72750000000002, 128.75500000000002,<br>128.78250000000003, 128.81, 128.8375, 128.865, 128.8925, 128.92000000000002,<br>128.94750000000002, 128.97500000000002, 129.00250000000003,<br>129.03000000000003, 129.0575, 129.085, 129.1125, 129.14000000000001,<br>129.16750000000002, 129.19500000000002, 129.22250000000003,<br>129.25000000000003, 129.27750000000003, 129.305, 129.3325, 129.36,<br>129.38750000000002, 129.41500000000002, 129.44250000000002,<br>129.47000000000003, 129.4975, 129.525, 129.5525, 129.58, 129.60750000000002,<br>129.63500000000002, 129.66250000000002, 129.69000000000003,<br>129.71750000000003, 129.745, 129.7725, 129.8, 129.82750000000001,<br>129.85500000000002, 129.88250000000002, 129.91000000000003,<br>129.93750000000003, 129.96500000000003, 129.9925, 130.02, 130.0475,<br>130.07500000000002, 130.10250000000002, 130.13000000000002,<br>130.15750000000003, 130.185, 130.2125, 130.24, 130.2675, 130.29500000000002,<br>130.32250000000002, 130.35000000000002, 130.37750000000003,<br>130.40500000000003, 130.4325, 130.46, 130.4875, 130.51500000000001,<br>130.54250000000002, 130.57000000000002, 130.59750000000003,<br>130.62500000000003, 130.65250000000003, 130.68, 130.7075, 130.735,<br>130.76250000000002, 130.79000000000002, 130.81750000000002,<br>130.84500000000003, 130.8725, 130.9, 130.9275, 130.955, 130.98250000000002,<br>131.01000000000002, 131.03750000000002, 131.06500000000003,<br>131.09250000000003, 131.12, 131.1475, 131.175, 131.20250000000001,<br>131.23000000000002, 131.25750000000002, 131.28500000000003,<br>131.31250000000003, 131.34000000000003, 131.3675, 131.395, 131.4225,<br>131.45000000000002, 131.47750000000002, 131.50500000000002,<br>131.53250000000003, 131.56, 131.5875, 131.615, 131.6425, 131.67000000000002,<br>131.69750000000002, 131.72500000000002, 131.75250000000003,<br>131.78000000000003, 131.8075, 131.835, 131.8625, 131.89000000000001,<br>131.91750000000002, 131.94500000000002, 131.97250000000003,<br>132.00000000000003, 132.02750000000003, 132.055, 132.0825, 132.11,<br>132.13750000000002, 132.16500000000002, 132.19250000000002,<br>132.22000000000003, 132.2475, 132.275, 132.3025, 132.33, 132.35750000000002,<br>132.38500000000002, 132.41250000000002, 132.44000000000003,<br>132.46750000000003, 132.495, 132.5225, 132.55, 132.57750000000001,<br>132.60500000000002, 132.63250000000002, 132.66000000000003,<br>132.68750000000003, 132.71500000000003, 132.7425, 132.77, 132.7975,<br>132.82500000000002, 132.85250000000002, 132.88000000000002,<br>132.90750000000003, 132.935, 132.9625, 132.99, 133.0175, 133.04500000000002,<br>133.07250000000002, 133.10000000000002, 133.12750000000003,<br>133.15500000000003, 133.1825, 133.21, 133.2375, 133.26500000000001,<br>133.29250000000002, 133.32000000000002, 133.34750000000003,<br>133.37500000000003, 133.40250000000003, 133.43, 133.4575, 133.485,<br>133.51250000000002, 133.54000000000002, 133.56750000000002,<br>133.59500000000003, 133.6225, 133.65, 133.6775, 133.705, 133.73250000000002,<br>133.76000000000002, 133.78750000000002, 133.81500000000003,<br>133.84250000000003, 133.87, 133.8975, 133.925, 133.95250000000001,<br>133.98000000000002, 134.00750000000002, 134.03500000000003, |

| Description | Value                                                                                                                                                                                                                                                                                                                                                                                                                                                                                                                                                                                                                                                                                                                                                                                                                                                                                                                                                                                                                                                                                                                                                                                                                                                                                                                                                                                                                                                                                                                                                                                                                                                                                                                                                                                                                                                                                                                                                                                                                                                                                                                                                                                                                                                                                                                                                                                                                                                                                                                                                                                                                                                                                                                                                                                                                                                                                                                                                                                                                                                                                                                                                                                                                                                             |
|-------------|-------------------------------------------------------------------------------------------------------------------------------------------------------------------------------------------------------------------------------------------------------------------------------------------------------------------------------------------------------------------------------------------------------------------------------------------------------------------------------------------------------------------------------------------------------------------------------------------------------------------------------------------------------------------------------------------------------------------------------------------------------------------------------------------------------------------------------------------------------------------------------------------------------------------------------------------------------------------------------------------------------------------------------------------------------------------------------------------------------------------------------------------------------------------------------------------------------------------------------------------------------------------------------------------------------------------------------------------------------------------------------------------------------------------------------------------------------------------------------------------------------------------------------------------------------------------------------------------------------------------------------------------------------------------------------------------------------------------------------------------------------------------------------------------------------------------------------------------------------------------------------------------------------------------------------------------------------------------------------------------------------------------------------------------------------------------------------------------------------------------------------------------------------------------------------------------------------------------------------------------------------------------------------------------------------------------------------------------------------------------------------------------------------------------------------------------------------------------------------------------------------------------------------------------------------------------------------------------------------------------------------------------------------------------------------------------------------------------------------------------------------------------------------------------------------------------------------------------------------------------------------------------------------------------------------------------------------------------------------------------------------------------------------------------------------------------------------------------------------------------------------------------------------------------------------------------------------------------------------------------------------------------|
|             | 134.06250000000003, 134.09000000000003, 134.1175, 134.145, 134.1725, 134.20000000000002, 134.22750000000002, 134.25500000000002, 134.28250000000003, 134.31, 134.3375, 134.365, 134.3925, 134.42000000000002, 134.44750000000002, 134.47500000000002, 134.50250000000003, 134.53000000000003, 134.5575, 134.585, 134.6125, 134.64000000000001, 134.66750000000002, 134.69500000000002, 134.72250000000003, 134.75000000000003, 134.77750000000003, 134.805, 134.8325, 134.86, 134.88750000000002, 134.91500000000002, 134.94250000000002, 134.97000000000003, 134.9975, 135.025, 135.0525, 135.08, 135.10750000000002, 135.13500000000002, 135.16250000000002, 135.19000000000003, 135.21750000000003, 135.245, 135.2725, 135.3, 135.32750000000001, 135.35500000000002, 135.38250000000002, 135.41000000000003, 135.43750000000003, 135.46500000000003, 135.4925, 135.52, 135.5475, 135.57500000000002, 135.60250000000002, 135.63000000000002, 135.65750000000003, 135.685, 135.7125, 135.74, 135.7675, 135.79500000000002, 135.82250000000002, 135.85000000000002, 135.87750000000003, 135.90500000000003, 135.9325, 135.96, 135.9875, 136.01500000000001, 136.04250000000002, 136.07000000000002, 136.09750000000003, 136.12500000000003, 136.15250000000003, 136.18, 136.2075, 136.235, 136.26250000000002, 136.29000000000002, 136.31750000000002, 136.34500000000003, 136.3725, 136.4, 136.4275, 136.455, 136.48250000000002, 136.51000000000002, 136.53750000000002, 136.56500000000003, 136.59250000000003, 136.62, 136.6475, 136.675, 136.70250000000001, 136.73000000000002, 136.75750000000002, 136.78500000000003, 136.81250000000003, 136.84000000000003, 136.8675, 136.895, 136.9225, 136.95000000000002, 136.97750000000002, 137.00500000000002, 137.03250000000003, 137.06, 137.0875, 137.115, 137.1425, 137.17000000000002, 137.19750000000002, 137.22500000000002, 137.25250000000003, 137.28000000000003, 137.3075, 137.335, 137.3625, 137.39000000000001, 137.41750000000002, 137.44500000000002, 137.47250000000003, 137.50000000000003, 137.52750000000003, 137.555, 137.5825, 137.61, 137.63750000000002, 137.66500000000002, 137.69250000000002, 137.72000000000003, 137.7475, 137.775, 137.8025, 137.83, 137.85750000000002, 137.88500000000002, 137.91250000000002, 137.94000000000003, 137.96750000000003, 137.995, 138.0225, 138.05, 138.07750000000001, 138.10500000000002, 138.13250000000002, 138.16000000000003, 138.18750000000003, 138.21500000000003, 138.2425, 138.27, 138.2975, 138.32500000000002, 138.35250000000002, 138.38000000000002, 138.40750000000003, 138.435, 138.4625, 138.49, 138.5175, 138.54500000000002, 138.57250000000002, 138.60000000000002, 138.62750000000003, 138.65500000000003, 138.6825, 138.71, 138.7375, 138.76500000000001, 138.79250000000002, 138.82000000000002, 138.84750000000003, 138.87500000000003, 138.90250000000003, 138.93, 138.9575, 138.985, 139.01250000000002, 139.04000000000002, 139.06750000000002, 139.09500000000003, 139.1225, 139.15, 139.1775, 139.205, 139.23250000000002, 139.26000000000002, 139.28750000000002, 139.31500000000003, 139.34250000000003, 139.37, 139.3975, 139.425, 139.45250000000001, 139.48000000000002, 139.50750000000002, 139.53500000000003, |

| Description | Value                                                                                                                                                                                                                                                                                                                                                                                                                                                                                                                                                                                                                                                                                                                                                                                                                                                                                                                                                                                                                                                                                                                                                                                                                                                                                                                                                                                                                                                                                                                                                                                                                                                                                                                                                                                                                                                                                                                                                                                                                                                                                                                                                                                                                                                                                                                                                                                                                                                                                                                                                                                                                                                                                                                                                                                                                                                                                                                                                                                                                                                                                                                                                                                                                                                                                                                                                                                                                                                                                                                        |
|-------------|------------------------------------------------------------------------------------------------------------------------------------------------------------------------------------------------------------------------------------------------------------------------------------------------------------------------------------------------------------------------------------------------------------------------------------------------------------------------------------------------------------------------------------------------------------------------------------------------------------------------------------------------------------------------------------------------------------------------------------------------------------------------------------------------------------------------------------------------------------------------------------------------------------------------------------------------------------------------------------------------------------------------------------------------------------------------------------------------------------------------------------------------------------------------------------------------------------------------------------------------------------------------------------------------------------------------------------------------------------------------------------------------------------------------------------------------------------------------------------------------------------------------------------------------------------------------------------------------------------------------------------------------------------------------------------------------------------------------------------------------------------------------------------------------------------------------------------------------------------------------------------------------------------------------------------------------------------------------------------------------------------------------------------------------------------------------------------------------------------------------------------------------------------------------------------------------------------------------------------------------------------------------------------------------------------------------------------------------------------------------------------------------------------------------------------------------------------------------------------------------------------------------------------------------------------------------------------------------------------------------------------------------------------------------------------------------------------------------------------------------------------------------------------------------------------------------------------------------------------------------------------------------------------------------------------------------------------------------------------------------------------------------------------------------------------------------------------------------------------------------------------------------------------------------------------------------------------------------------------------------------------------------------------------------------------------------------------------------------------------------------------------------------------------------------------------------------------------------------------------------------------------------------|
|             | 139.56250000000003, 139.59000000000003, 139.6175, 139.645, 139.6725,<br>139.70000000000002, 139.72750000000002, 139.75500000000002,<br>139.78250000000003, 139.81, 139.83750000000003, 139.865, 139.8925,<br>139.92000000000002, 139.94750000000002, 139.97500000000002,<br>140.00250000000003, 140.03000000000003, 140.0575, 140.085, 140.1125,<br>140.14000000000001, 140.16750000000002, 140.19500000000002,<br>140.22250000000003, 140.25000000000003, 140.27750000000003, 140.305, 140.3325,<br>140.36, 140.38750000000002, 140.41500000000002, 140.44250000000002,<br>140.47000000000003, 140.4975, 140.52500000000003, 140.5525, 140.58,<br>140.60750000000002, 140.63500000000002, 140.66250000000002,<br>140.69000000000003, 140.71750000000003, 140.745, 140.7725, 140.8,<br>140.82750000000001, 140.85500000000002, 140.88250000000002,<br>140.91000000000003, 140.93750000000003, 140.96500000000003, 140.9925, 141.02,<br>141.0475, 141.07500000000002, 141.10250000000002, 141.13000000000002,<br>141.15750000000003, 141.18500000000003, 141.21250000000003, 141.24, 141.2675,<br>141.29500000000002, 141.32250000000002, 141.35000000000002,<br>141.37750000000003, 141.40500000000003, 141.4325, 141.46, 141.4875,<br>141.51500000000001, 141.54250000000002, 141.57000000000002,<br>141.59750000000003, 141.62500000000003, 141.65250000000003, 141.68, 141.7075,<br>141.735, 141.76250000000002, 141.79000000000002, 141.81750000000002,<br>141.84500000000003, 141.87250000000003, 141.90000000000003, 141.9275, 141.955,<br>141.98250000000002, 142.01000000000002, 142.03750000000002,<br>142.06500000000003, 142.09250000000003, 142.12, 142.1475, 142.175,<br>142.20250000000001, 142.23000000000002, 142.25750000000002,<br>142.28500000000003, 142.31250000000003, 142.34000000000003, 142.3675, 142.395,<br>142.4225, 142.45000000000002, 142.47750000000002, 142.50500000000002,<br>142.53250000000003, 142.56, 142.58750000000003, 142.615, 142.6425,<br>142.67000000000002, 142.69750000000002, 142.72500000000002,<br>142.75250000000003, 142.78000000000003, 142.8075, 142.835, 142.8625,<br>142.89000000000001, 142.91750000000002, 142.94500000000002,<br>142.97250000000003, 143.00000000000003, 143.02750000000003, 143.055, 143.0825,<br>143.11, 143.13750000000002, 143.16500000000002, 143.19250000000002,<br>143.22000000000003, 143.2475, 143.27500000000003, 143.3025, 143.33,<br>143.35750000000002, 143.38500000000002, 143.41250000000002,<br>143.44000000000003, 143.46750000000003, 143.495, 143.5225, 143.55,<br>143.57750000000001, 143.60500000000002, 143.63250000000002,<br>143.66000000000003, 143.68750000000003, 143.71500000000003, 143.7425, 143.77,<br>143.7975, 143.82500000000002, 143.85250000000002, 143.88000000000002,<br>143.90750000000003, 143.935, 143.96250000000003, 143.99, 144.0175,<br>144.04500000000002, 144.07250000000002, 144.10000000000002,<br>144.12750000000003, 144.15500000000003, 144.1825, 144.21000000000004, 144.2375,<br>144.26500000000001, 144.29250000000002, 144.32000000000002,<br>144.34750000000003, 144.37500000000003, 144.40250000000003, 144.43, 144.4575,<br>144.485, 144.51250000000002, 144.54000000000002, 144.56750000000002,<br>144.59500000000003, 144.6225, 144.65000000000003, 144.6775, 144.705,<br>144.73250000000002, 144.76000000000002, 144.78750000000002,<br>144.81500000000003, 144.84250000000003, 144.87, 144.89750000000004, 144.925,<br>144.95250000000001, 144.98000000000002, 145.00750000000002, |

| Description | Value                                                                                                                                                                                                                                                                                                                                                                                                                                                                                                                                                                                                                                                                                                                                                                                                                                                                                                                                                                                                                                                                                                                                                                                                                                                                                                                                                                                                                                                                                                                                                                                                                                                                                                                                                                                                                                                                                                                                                                                                                                                                                                                                                                                                                                                                                                                                                                                                                                                                                                                                                                                                                                                                                                                                                                                                                                                                                                                                                                                                                                                                                                                                                                                                                                                                                                                                                                                                                                                                                                                                                                                       |
|-------------|---------------------------------------------------------------------------------------------------------------------------------------------------------------------------------------------------------------------------------------------------------------------------------------------------------------------------------------------------------------------------------------------------------------------------------------------------------------------------------------------------------------------------------------------------------------------------------------------------------------------------------------------------------------------------------------------------------------------------------------------------------------------------------------------------------------------------------------------------------------------------------------------------------------------------------------------------------------------------------------------------------------------------------------------------------------------------------------------------------------------------------------------------------------------------------------------------------------------------------------------------------------------------------------------------------------------------------------------------------------------------------------------------------------------------------------------------------------------------------------------------------------------------------------------------------------------------------------------------------------------------------------------------------------------------------------------------------------------------------------------------------------------------------------------------------------------------------------------------------------------------------------------------------------------------------------------------------------------------------------------------------------------------------------------------------------------------------------------------------------------------------------------------------------------------------------------------------------------------------------------------------------------------------------------------------------------------------------------------------------------------------------------------------------------------------------------------------------------------------------------------------------------------------------------------------------------------------------------------------------------------------------------------------------------------------------------------------------------------------------------------------------------------------------------------------------------------------------------------------------------------------------------------------------------------------------------------------------------------------------------------------------------------------------------------------------------------------------------------------------------------------------------------------------------------------------------------------------------------------------------------------------------------------------------------------------------------------------------------------------------------------------------------------------------------------------------------------------------------------------------------------------------------------------------------------------------------------------------|
|             | 145.03500000000003, 145.06250000000003, 145.09000000000003, 145.1175, 145.145,<br>145.1725, 145.20000000000002, 145.22750000000002, 145.25500000000002,<br>145.28250000000003, 145.31, 145.33750000000003, 145.365, 145.3925,<br>145.42000000000002, 145.44750000000002, 145.47500000000002,<br>145.50250000000003, 145.53000000000003, 145.5575, 145.58500000000004, 145.6125,<br>145.64000000000001, 145.66750000000002, 145.69500000000002,<br>145.72250000000003, 145.75000000000003, 145.77750000000003, 145.805, 145.8325,<br>145.86, 145.88750000000002, 145.91500000000002, 145.94250000000002,<br>145.97000000000003, 145.9975, 146.02500000000003, 146.0525, 146.08,<br>146.10750000000002, 146.13500000000002, 146.16250000000002,<br>146.19000000000003, 146.21750000000003, 146.245, 146.27250000000004, 146.3,<br>146.32750000000001, 146.35500000000002, 146.38250000000002,<br>146.41000000000003, 146.43750000000003, 146.46500000000003, 146.4925, 146.52,<br>146.5475, 146.57500000000002, 146.60250000000002, 146.63000000000002,<br>146.65750000000003, 146.685, 146.71250000000003, 146.74, 146.7675,<br>146.79500000000002, 146.82250000000002, 146.85000000000002,<br>146.87750000000003, 146.90500000000003, 146.9325, 146.96000000000004, 146.9875,<br>147.01500000000001, 147.04250000000002, 147.07000000000002,<br>147.09750000000003, 147.12500000000003, 147.15250000000003, 147.18, 147.2075,<br>147.235, 147.26250000000002, 147.29000000000002, 147.31750000000002,<br>147.34500000000003, 147.3725, 147.40000000000003, 147.4275, 147.455,<br>147.48250000000002, 147.51000000000002, 147.53750000000002,<br>147.56500000000003, 147.59250000000003, 147.62, 147.64750000000004, 147.675,<br>147.70250000000001, 147.73000000000002, 147.75750000000002,<br>147.78500000000003, 147.81250000000003, 147.84000000000003, 147.8675, 147.895,<br>147.9225, 147.95000000000002, 147.97750000000002, 148.00500000000002,<br>148.03250000000003, 148.06, 148.08750000000003, 148.115, 148.1425,<br>148.17000000000002, 148.19750000000002, 148.22500000000002,<br>148.25250000000003, 148.28000000000003, 148.3075, 148.33500000000004, 148.3625,<br>148.39000000000001, 148.41750000000002, 148.44500000000002,<br>148.47250000000003, 148.50000000000003, 148.52750000000003, 148.555, 148.5825,<br>148.61, 148.63750000000002, 148.66500000000002, 148.69250000000002,<br>148.72000000000003, 148.7475, 148.77500000000003, 148.8025, 148.83,<br>148.85750000000002, 148.88500000000002, 148.91250000000002,<br>148.94000000000003, 148.96750000000003, 148.995, 149.02250000000004, 149.05,<br>149.07750000000001, 149.10500000000002, 149.13250000000002,<br>149.16000000000003, 149.18750000000003, 149.21500000000003, 149.2425, 149.27,<br>149.2975, 149.32500000000002, 149.35250000000002, 149.38000000000002,<br>149.40750000000003, 149.435, 149.46250000000003, 149.49, 149.5175,<br>149.54500000000002, 149.57250000000002, 149.60000000000002,<br>149.62750000000003, 149.65500000000003, 149.6825, 149.71000000000004, 149.7375,<br>149.76500000000001, 149.79250000000002, 149.82000000000002,<br>149.84750000000003, 149.87500000000003, 149.90250000000003, 149.93, 149.9575,<br>149.985, 150.01250000000002, 150.04000000000002, 150.06750000000002,<br>150.09500000000003, 150.1225, 150.15000000000003, 150.1775, 150.205,<br>150.23250000000002, 150.26000000000002, 150.28750000000002,<br>150.31500000000003, 150.34250000000003, 150.37, 150.39750000000004, 150.425,<br>150.45250000000001, 150.48000000000002, 150.50750000000002, |



| Description | Value                                                                                                                                                                                                                                                                                                                                                                                                                                                                                                                                                                                                                                                                                                                                                                                                                                                                                                                                                                                                                                                                                                                                                                                                                                                                                                                                                                                                                                                                                                                                                                                                                                                                                                                                                                                                                                                                                                                                                                                                                                                                                                                                                                                                                                                                                                                                                                                                                                                                                                                                                                                                                                                                                                                                                                                                                                                                                                                                                                                                                                                                                                                                                                                                                                                                                                                                                                                                                                                                                                                                                                                                            |
|-------------|------------------------------------------------------------------------------------------------------------------------------------------------------------------------------------------------------------------------------------------------------------------------------------------------------------------------------------------------------------------------------------------------------------------------------------------------------------------------------------------------------------------------------------------------------------------------------------------------------------------------------------------------------------------------------------------------------------------------------------------------------------------------------------------------------------------------------------------------------------------------------------------------------------------------------------------------------------------------------------------------------------------------------------------------------------------------------------------------------------------------------------------------------------------------------------------------------------------------------------------------------------------------------------------------------------------------------------------------------------------------------------------------------------------------------------------------------------------------------------------------------------------------------------------------------------------------------------------------------------------------------------------------------------------------------------------------------------------------------------------------------------------------------------------------------------------------------------------------------------------------------------------------------------------------------------------------------------------------------------------------------------------------------------------------------------------------------------------------------------------------------------------------------------------------------------------------------------------------------------------------------------------------------------------------------------------------------------------------------------------------------------------------------------------------------------------------------------------------------------------------------------------------------------------------------------------------------------------------------------------------------------------------------------------------------------------------------------------------------------------------------------------------------------------------------------------------------------------------------------------------------------------------------------------------------------------------------------------------------------------------------------------------------------------------------------------------------------------------------------------------------------------------------------------------------------------------------------------------------------------------------------------------------------------------------------------------------------------------------------------------------------------------------------------------------------------------------------------------------------------------------------------------------------------------------------------------------------------------------------------|
|             | 150.53500000000003, 150.56250000000003, 150.59000000000003, 150.6175, 150.645,<br>150.6725, 150.70000000000002, 150.72750000000002, 150.75500000000002,<br>150.78250000000003, 150.81, 150.83750000000003, 150.865, 150.8925,<br>150.92000000000002, 150.94750000000002, 150.97500000000002,<br>151.00250000000003, 151.03000000000003, 151.0575, 151.08500000000004, 151.1125,<br>151.14000000000001, 151.16750000000002, 151.19500000000002,<br>151.22250000000003, 151.25000000000003, 151.27750000000003, 151.305, 151.3325,<br>151.36, 151.38750000000002, 151.41500000000002, 151.44250000000002,<br>151.47000000000003, 151.4975, 151.52500000000003, 151.5525, 151.58,<br>151.60750000000002, 151.63500000000002, 151.66250000000002,<br>151.69000000000003, 151.71750000000003, 151.745, 151.77250000000004, 151.8,<br>151.82750000000001, 151.85500000000002, 151.88250000000002,<br>151.91000000000003, 151.93750000000003, 151.96500000000003, 151.9925, 152.02,<br>152.0475, 152.07500000000002, 152.10250000000002, 152.13000000000002,<br>152.15750000000003, 152.185, 152.21250000000003, 152.24, 152.2675,<br>152.29500000000002, 152.32250000000002, 152.35000000000002,<br>152.37750000000003, 152.40500000000003, 152.4325, 152.46000000000004, 152.4875,<br>152.51500000000001, 152.54250000000002, 152.57000000000002,<br>152.59750000000003, 152.62500000000003, 152.65250000000003, 152.68, 152.7075,<br>152.735, 152.76250000000002, 152.79000000000002, 152.81750000000002,<br>152.84500000000003, 152.8725, 152.90000000000003, 152.9275, 152.955,<br>152.98250000000002, 153.01000000000002, 153.03750000000002,<br>153.06500000000003, 153.09250000000003, 153.12, 153.14750000000004, 153.175,<br>153.20250000000001, 153.23000000000002, 153.25750000000002,<br>153.28500000000003, 153.31250000000003, 153.34000000000003, 153.3675, 153.395,<br>153.4225, 153.45000000000002, 153.47750000000002, 153.50500000000002,<br>153.53250000000003, 153.56, 153.58750000000003, 153.615, 153.6425,<br>153.67000000000002, 153.69750000000002, 153.72500000000002,<br>153.75250000000003, 153.78000000000003, 153.8075, 153.83500000000004, 153.8625,<br>153.89000000000001, 153.91750000000002, 153.94500000000002,<br>153.97250000000003, 154.00000000000003, 154.02750000000003, 154.055, 154.0825,<br>154.11, 154.13750000000002, 154.16500000000002, 154.19250000000002,<br>154.22000000000003, 154.2475, 154.27500000000003, 154.3025, 154.33,<br>154.35750000000002, 154.38500000000002, 154.41250000000002,<br>154.44000000000003, 154.46750000000003, 154.495, 154.52250000000004, 154.55,<br>154.57750000000001, 154.60500000000002, 154.63250000000002,<br>154.66000000000003, 154.68750000000003, 154.71500000000003, 154.7425, 154.77,<br>154.7975, 154.82500000000002, 154.85250000000002, 154.88000000000002,<br>154.90750000000003, 154.93500000000003, 154.96250000000003, 154.99, 155.0175,<br>155.04500000000002, 155.07250000000002, 155.10000000000002,<br>155.12750000000003, 155.15500000000003, 155.1825, 155.21000000000004, 155.2375,<br>155.26500000000001, 155.29250000000002, 155.32000000000002,<br>155.34750000000003, 155.37500000000003, 155.40250000000003, 155.43, 155.4575,<br>155.485, 155.51250000000002, 155.54000000000002, 155.56750000000002,<br>155.59500000000003, 155.62250000000003, 155.65000000000003, 155.6775, 155.705,<br>155.73250000000002, 155.76000000000002, 155.78750000000002,<br>155.81500000000003, 155.84250000000003, 155.87, 155.89750000000004, 155.925,<br>155.95250000000001, 155.98000000000002, 156.00750000000002, |

| Description | Value                                                                                                                                                                                                                                                                                                                                                                                                                                                                                                                                                                                                                                                                                                                                                                                                                                                                                                                                                                                                                                                                                                                                                                                                                                                                                                                                                                                                                                                                                                                                                                                                                                                                                                                                                                                                                                                                                                                                                                                                                                                                                                                                                                                                                                                                                                                                                                                                                                                                                                                                                                                                                                                                                                                                                                                                                                                                                                                                                                                                                                                                                                                                                                                                                                                                                                                                                                                                                                                                                                                                                                                                                                                                   |
|-------------|-------------------------------------------------------------------------------------------------------------------------------------------------------------------------------------------------------------------------------------------------------------------------------------------------------------------------------------------------------------------------------------------------------------------------------------------------------------------------------------------------------------------------------------------------------------------------------------------------------------------------------------------------------------------------------------------------------------------------------------------------------------------------------------------------------------------------------------------------------------------------------------------------------------------------------------------------------------------------------------------------------------------------------------------------------------------------------------------------------------------------------------------------------------------------------------------------------------------------------------------------------------------------------------------------------------------------------------------------------------------------------------------------------------------------------------------------------------------------------------------------------------------------------------------------------------------------------------------------------------------------------------------------------------------------------------------------------------------------------------------------------------------------------------------------------------------------------------------------------------------------------------------------------------------------------------------------------------------------------------------------------------------------------------------------------------------------------------------------------------------------------------------------------------------------------------------------------------------------------------------------------------------------------------------------------------------------------------------------------------------------------------------------------------------------------------------------------------------------------------------------------------------------------------------------------------------------------------------------------------------------------------------------------------------------------------------------------------------------------------------------------------------------------------------------------------------------------------------------------------------------------------------------------------------------------------------------------------------------------------------------------------------------------------------------------------------------------------------------------------------------------------------------------------------------------------------------------------------------------------------------------------------------------------------------------------------------------------------------------------------------------------------------------------------------------------------------------------------------------------------------------------------------------------------------------------------------------------------------------------------------------------------------------------------------|
|             | 156.03500000000003, 156.06250000000003, 156.09000000000003, 156.1175, 156.145,<br>156.1725, 156.20000000000002, 156.22750000000002, 156.25500000000002,<br>156.28250000000003, 156.31000000000003, 156.33750000000003, 156.365, 156.3925,<br>156.42000000000002, 156.44750000000002, 156.47500000000002,<br>156.50250000000003, 156.53000000000003, 156.5575, 156.58500000000004, 156.6125,<br>156.64000000000001, 156.66750000000002, 156.69500000000002,<br>156.72250000000003, 156.75000000000003, 156.77750000000003, 156.805, 156.8325,<br>156.86, 156.88750000000002, 156.91500000000002, 156.94250000000002,<br>156.97000000000003, 156.99750000000003, 157.02500000000003, 157.0525, 157.08,<br>157.10750000000002, 157.13500000000002, 157.16250000000002,<br>157.19000000000003, 157.21750000000003, 157.245, 157.27250000000004, 157.3,<br>157.32750000000001, 157.35500000000002, 157.38250000000002,<br>157.41000000000003, 157.43750000000003, 157.46500000000003, 157.4925, 157.52,<br>157.5475, 157.57500000000002, 157.60250000000002, 157.63000000000002,<br>157.65750000000003, 157.68500000000003, 157.71250000000003, 157.74, 157.7675,<br>157.79500000000002, 157.82250000000002, 157.85000000000002,<br>157.87750000000003, 157.90500000000003, 157.9325, 157.96000000000004, 157.9875,<br>158.01500000000001, 158.04250000000002, 158.07000000000002,<br>158.09750000000003, 158.12500000000003, 158.15250000000003, 158.18, 158.2075,<br>158.235, 158.26250000000002, 158.29000000000002, 158.31750000000002,<br>158.34500000000003, 158.37250000000003, 158.40000000000003, 158.4275, 158.455,<br>158.48250000000002, 158.51000000000002, 158.53750000000002,<br>158.56500000000003, 158.59250000000003, 158.62, 158.64750000000004, 158.675,<br>158.70250000000001, 158.73000000000002, 158.75750000000002,<br>158.78500000000003, 158.81250000000003, 158.84000000000003, 158.8675, 158.895,<br>158.9225, 158.95000000000002, 158.97750000000002, 159.00500000000002,<br>159.03250000000003, 159.06000000000003, 159.08750000000003, 159.115, 159.1425,<br>159.17000000000002, 159.19750000000002, 159.22500000000002,<br>159.25250000000003, 159.28000000000003, 159.3075, 159.33500000000004, 159.3625,<br>159.39000000000001, 159.41750000000002, 159.44500000000002,<br>159.47250000000003, 159.50000000000003, 159.52750000000003, 159.555, 159.5825,<br>159.61, 159.63750000000002, 159.66500000000002, 159.69250000000002,<br>159.72000000000003, 159.74750000000003, 159.77500000000003, 159.8025, 159.83,<br>159.85750000000002, 159.88500000000002, 159.91250000000002,<br>159.94000000000003, 159.96750000000003, 159.995, 160.02250000000004, 160.05,<br>160.07750000000001, 160.10500000000002, 160.13250000000002,<br>160.16000000000003, 160.18750000000003, 160.21500000000003, 160.2425, 160.27,<br>160.2975, 160.32500000000002, 160.35250000000002, 160.38000000000002,<br>160.40750000000003, 160.43500000000003, 160.46250000000003, 160.49, 160.5175,<br>160.54500000000002, 160.57250000000002, 160.60000000000002,<br>160.62750000000003, 160.65500000000003, 160.6825, 160.71000000000004, 160.7375,<br>160.76500000000001, 160.79250000000002, 160.82000000000002,<br>160.84750000000003, 160.87500000000003, 160.90250000000003, 160.93,<br>160.95750000000004, 160.985, 161.01250000000002, 161.04000000000002,<br>161.06750000000002, 161.09500000000003, 161.12250000000003,<br>161.15000000000003, 161.1775, 161.205, 161.23250000000002, 161.26000000000002,<br>161.28750000000002, 161.31500000000003, 161.34250000000003, 161.37,<br>161.39750000000004, 161.425, 161.45250000000001, 161.48000000000002, |

| Description | Value                                                                                                                                                                                                                                                                                                                                                                                                                                                                                                                                                                                                                                                                                                                                                                                                                                                                                                                                                                                                                                                                                                                                                                                                                                                                                                                                                                                                                                                                                                                                                                                                                                                                                                                                                                                                                                                                                                                                                                                                                                                                                                                                                                                                                                                                                                                                                                                                                           |
|-------------|---------------------------------------------------------------------------------------------------------------------------------------------------------------------------------------------------------------------------------------------------------------------------------------------------------------------------------------------------------------------------------------------------------------------------------------------------------------------------------------------------------------------------------------------------------------------------------------------------------------------------------------------------------------------------------------------------------------------------------------------------------------------------------------------------------------------------------------------------------------------------------------------------------------------------------------------------------------------------------------------------------------------------------------------------------------------------------------------------------------------------------------------------------------------------------------------------------------------------------------------------------------------------------------------------------------------------------------------------------------------------------------------------------------------------------------------------------------------------------------------------------------------------------------------------------------------------------------------------------------------------------------------------------------------------------------------------------------------------------------------------------------------------------------------------------------------------------------------------------------------------------------------------------------------------------------------------------------------------------------------------------------------------------------------------------------------------------------------------------------------------------------------------------------------------------------------------------------------------------------------------------------------------------------------------------------------------------------------------------------------------------------------------------------------------------|
|             | 161.50750000000002, 161.53500000000003, 161.56250000000003,<br>161.59000000000003, 161.6175, 161.64500000000004, 161.6725, 161.70000000000002,<br>161.72750000000002, 161.75500000000002, 161.78250000000003,<br>161.81000000000003, 161.83750000000003, 161.865, 161.8925, 161.92000000000002,<br>161.94750000000002, 161.97500000000002, 162.00250000000003,<br>162.03000000000003, 162.0575, 162.08500000000004, 162.1125, 162.14000000000001,<br>162.16750000000002, 162.19500000000002, 162.22250000000003,<br>162.25000000000003, 162.27750000000003, 162.305, 162.33250000000004, 162.36,<br>162.38750000000002, 162.41500000000002, 162.44250000000002,<br>162.47000000000003, 162.49750000000003, 162.52500000000003, 162.5525, 162.58,<br>162.60750000000002, 162.63500000000002, 162.66250000000002,<br>162.69000000000003, 162.71750000000003, 162.745, 162.77250000000004, 162.8,<br>162.82750000000001, 162.85500000000002, 162.88250000000002,<br>162.91000000000003, 162.93750000000003, 162.96500000000003, 162.9925,<br>163.02000000000004, 163.0475, 163.07500000000002, 163.10250000000002,<br>163.13000000000002, 163.15750000000003, 163.18500000000003,<br>163.21250000000003, 163.24, 163.2675, 163.29500000000002, 163.32250000000002,<br>163.35000000000002, 163.37750000000003, 163.40500000000003, 163.4325,<br>163.46000000000004, 163.4875, 163.51500000000001, 163.54250000000002,<br>163.57000000000002, 163.59750000000003, 163.62500000000003,<br>163.65250000000003, 163.68, 163.70750000000004, 163.735, 163.76250000000002,<br>163.79000000000002, 163.81750000000002, 163.84500000000003,<br>163.87250000000003, 163.90000000000003, 163.9275, 163.955, 163.98250000000002,<br>164.01000000000002, 164.03750000000002, 164.06500000000003,<br>164.09250000000003, 164.12, 164.14750000000004, 164.175, 164.20250000000001,<br>164.23000000000002, 164.25750000000002, 164.28500000000003,<br>164.31250000000003, 164.34000000000003, 164.3675, 164.39500000000004, 164.4225,<br>164.45000000000002, 164.47750000000002, 164.50500000000002,<br>164.53250000000003, 164.56000000000003, 164.58750000000003, 164.615, 164.6425,<br>164.67000000000002, 164.69750000000002, 164.72500000000002,<br>164.75250000000003, 164.78000000000003, 164.8075, 164.83500000000004, 164.8625,<br>164.89000000000001, 164.91750000000002, 164.94500000000002,<br>164.97250000000003, 165.00000000000003} |

VALUES OF DEPENDENT VARIABLES

| Description | Value                                 |
|-------------|---------------------------------------|
| Settings    | User controlled                       |
| Method      | Solution                              |
| Study       | <a href="#">Study 2 (CV 40 to 44)</a> |
| Settings    | User controlled                       |
| Method      | Solution                              |
| Study       | <a href="#">Study 2 (CV 40 to 44)</a> |

MESH

| Feature | Value |
|---------|-------|
|---------|-------|

| Feature    | Value |
|------------|-------|
| Geometry 1 | mesh1 |

#### PHYSICS AND VARIABLES SELECTION

| Physics interface                             | Discretization |
|-----------------------------------------------|----------------|
| Transport of Diluted Species in droplet (tds) | physics        |
| Moving Mesh (ale)                             | physics        |

#### MESH SELECTION

| Geometry           | Mesh  |
|--------------------|-------|
| Geometry 1 (geom1) | mesh1 |

## 5.2 SOLVER CONFIGURATIONS

### 5.2.1 Solution 6

#### Compile Equations: Time Dependent (st1)

##### STUDY AND STEP

| Description    | Value                                 |
|----------------|---------------------------------------|
| Use study      | <a href="#">Study 3 (CV 21 to 30)</a> |
| Use study step | <a href="#">Time Dependent</a>        |

##### LOG

```
<---- Compile Equations: Time Dependent in Study 3 (CV 21 to 30)/Solution 6
(sol6) -----
Started at May 31, 2023 10:51:37 AM.
Geometry shape function: Linear Lagrange
Running on Intel64 Family 6 Model 158 Stepping 10, GenuineIntel.
Using 1 socket with 6 cores in total on LAPTOP-2492RD8I.
Available memory: 32.27 GB.
Time: 2 s.
Physical memory: 2.42 GB
Virtual memory: 2.5 GB
Ended at May 31, 2023 10:51:38 AM.
----- Compile Equations: Time Dependent in Study 3 (CV 21 to 30)/Solution 6
(sol6) ----->
```

#### Dependent Variables 1 (v1)

##### GENERAL

| Description           | Value                          |
|-----------------------|--------------------------------|
| Defined by study step | <a href="#">Time Dependent</a> |

##### INITIAL VALUES OF VARIABLES SOLVED FOR

| Description | Value |
|-------------|-------|
|-------------|-------|

| Description | Value                               |
|-------------|-------------------------------------|
| Method      | Solution                            |
| Solution    | <a href="#">Remeshed Solution 2</a> |

#### RESIDUAL SCALING

| Description | Value  |
|-------------|--------|
| Method      | Manual |

#### VALUES OF VARIABLES NOT SOLVED FOR

| Description | Value                               |
|-------------|-------------------------------------|
| Method      | Solution                            |
| Solution    | <a href="#">Remeshed Solution 2</a> |

#### INITIAL VALUE CALCULATION CONSTANTS

| Constant name | Initial value source                |
|---------------|-------------------------------------|
| t             | range(20*t_cv,t_tot/nb/200,30*t_cv) |
| timestep      | 0.055000000000000014[s]             |

#### LOG

```
<---- Dependent Variables 1 in Study 3 (CV 21 to 30)/Solution 6 (sol6) -----
Started at May 31, 2023 10:51:38 AM.
Initial values of variables solved for: Remeshed Solution 2 (sol5), t=110 s [Last].
Values of variables not solved for: Remeshed Solution 2 (sol5), t=110 s [Last].
Solution time: 0 s.
Physical memory: 2.42 GB
Virtual memory: 2.5 GB
Ended at May 31, 2023 10:51:39 AM.
----- Dependent Variables 1 in Study 3 (CV 21 to 30)/Solution 6 (sol6) ----->
```

#### Concentration (comp1.cOx) (comp1\_cOx)

##### GENERAL

| Description        | Value                              |
|--------------------|------------------------------------|
| Field components   | comp1.cOx                          |
| Internal variables | {comp1.uflux.cOx, comp1.dflux.cOx} |

#### Concentration (comp1.cRed) (comp1\_cRed)

##### GENERAL

| Description        | Value                                |
|--------------------|--------------------------------------|
| Field components   | comp1.cRed                           |
| Internal variables | {comp1.uflux.cRed, comp1.dflux.cRed} |

#### comp1.comp1.RgZg (comp1\_comp1\_RgZg)

##### GENERAL

| Description          | Value    |
|----------------------|----------|
| Field components     | {Rg, Zg} |
| Solve for this field | Off      |

### Spatial mesh displacement (comp1.spatial.disp) (comp1\_spatial\_disp)

#### GENERAL

| Description      | Value                              |
|------------------|------------------------------------|
| Field components | {comp1.spatial.u, comp1.spatial.w} |

#### SCALING

| Description | Value                 |
|-------------|-----------------------|
| Method      | Manual                |
| Scale       | 1.7715973018719574E-7 |

### Time-Dependent Solver 1 (t1)

#### GENERAL

| Description           | Value                                                                                                                                                                                                                                                                                                                                                                                                                                                                                                                                                                                                                                                                                                                                                                                                                                                                                                                                                                                                                                                                                                                                                                                                                                                                                                                                                                                                                                                                                                                                                                                                                    |
|-----------------------|--------------------------------------------------------------------------------------------------------------------------------------------------------------------------------------------------------------------------------------------------------------------------------------------------------------------------------------------------------------------------------------------------------------------------------------------------------------------------------------------------------------------------------------------------------------------------------------------------------------------------------------------------------------------------------------------------------------------------------------------------------------------------------------------------------------------------------------------------------------------------------------------------------------------------------------------------------------------------------------------------------------------------------------------------------------------------------------------------------------------------------------------------------------------------------------------------------------------------------------------------------------------------------------------------------------------------------------------------------------------------------------------------------------------------------------------------------------------------------------------------------------------------------------------------------------------------------------------------------------------------|
| Defined by study step | <a href="#">Time Dependent</a>                                                                                                                                                                                                                                                                                                                                                                                                                                                                                                                                                                                                                                                                                                                                                                                                                                                                                                                                                                                                                                                                                                                                                                                                                                                                                                                                                                                                                                                                                                                                                                                           |
| Output times          | {110.00000000000001, 110.02750000000002, 110.05500000000002, 110.08250000000001, 110.11000000000001, 110.13750000000002, 110.16500000000002, 110.19250000000001, 110.22000000000001, 110.24750000000002, 110.27500000000002, 110.30250000000001, 110.33000000000001, 110.35750000000002, 110.38500000000002, 110.41250000000001, 110.44000000000001, 110.46750000000002, 110.49500000000002, 110.52250000000001, 110.55000000000001, 110.57750000000001, 110.60500000000002, 110.63250000000001, 110.66000000000001, 110.68750000000001, 110.71500000000002, 110.74250000000002, 110.77000000000001, 110.79750000000001, 110.82500000000002, 110.85250000000002, 110.88000000000001, 110.90750000000001, 110.93500000000002, 110.96250000000002, 110.99000000000001, 111.01750000000001, 111.04500000000002, 111.07250000000002, 111.10000000000001, 111.12750000000001, 111.15500000000002, 111.18250000000002, 111.21000000000001, 111.23750000000001, 111.26500000000001, 111.29250000000002, 111.32000000000002, 111.34750000000001, 111.37500000000001, 111.40250000000002, 111.43000000000002, 111.45750000000001, 111.48500000000001, 111.51250000000002, 111.54000000000002, 111.56750000000001, 111.59500000000001, 111.62250000000002, 111.65000000000002, 111.67750000000001, 111.70500000000001, 111.73250000000002, 111.76000000000002, 111.78750000000001, 111.81500000000001, 111.84250000000002, 111.87000000000002, 111.89750000000001, 111.92500000000001, 111.95250000000001, 111.98000000000002, 112.00750000000002, 112.03500000000001, 112.06250000000001, 112.09000000000002, 112.11750000000002, |

| Description | Value                                                                                                                                                                                                                                                                                                                                                                                                                                                                                                                                                                                                                                                                                                                                                                                                                                                                                                                                                                                                                                                                                                                                                                                                                                                                                                                                                                                                                                                                                                                                                                                                                                                                                                                                                                                                                                                                                                                                                                                                                                                                                                                                                                                                                                                                                                                                                                                                                                                                                                                                                                                                                                                                                                                                                                                                                                                                                                                                                                                                                                                                                                                                        |
|-------------|----------------------------------------------------------------------------------------------------------------------------------------------------------------------------------------------------------------------------------------------------------------------------------------------------------------------------------------------------------------------------------------------------------------------------------------------------------------------------------------------------------------------------------------------------------------------------------------------------------------------------------------------------------------------------------------------------------------------------------------------------------------------------------------------------------------------------------------------------------------------------------------------------------------------------------------------------------------------------------------------------------------------------------------------------------------------------------------------------------------------------------------------------------------------------------------------------------------------------------------------------------------------------------------------------------------------------------------------------------------------------------------------------------------------------------------------------------------------------------------------------------------------------------------------------------------------------------------------------------------------------------------------------------------------------------------------------------------------------------------------------------------------------------------------------------------------------------------------------------------------------------------------------------------------------------------------------------------------------------------------------------------------------------------------------------------------------------------------------------------------------------------------------------------------------------------------------------------------------------------------------------------------------------------------------------------------------------------------------------------------------------------------------------------------------------------------------------------------------------------------------------------------------------------------------------------------------------------------------------------------------------------------------------------------------------------------------------------------------------------------------------------------------------------------------------------------------------------------------------------------------------------------------------------------------------------------------------------------------------------------------------------------------------------------------------------------------------------------------------------------------------------------|
|             | 112.14500000000001, 112.17250000000001, 112.20000000000002,<br>112.22750000000002, 112.25500000000001, 112.28250000000001,<br>112.31000000000002, 112.33750000000002, 112.36500000000001,<br>112.39250000000001, 112.42000000000002, 112.44750000000002,<br>112.47500000000001, 112.50250000000001, 112.53000000000002,<br>112.55750000000002, 112.58500000000001, 112.61250000000001,<br>112.64000000000001, 112.66750000000002, 112.69500000000002,<br>112.72250000000001, 112.75000000000001, 112.77750000000002,<br>112.80500000000002, 112.83250000000001, 112.86000000000001,<br>112.88750000000002, 112.91500000000002, 112.94250000000001,<br>112.97000000000001, 112.99750000000002, 113.02500000000002,<br>113.05250000000001, 113.08000000000001, 113.10750000000002,<br>113.13500000000002, 113.16250000000001, 113.19000000000001,<br>113.21750000000002, 113.24500000000002, 113.27250000000001,<br>113.30000000000001, 113.32750000000001, 113.35500000000002,<br>113.38250000000002, 113.41000000000001, 113.43750000000001,<br>113.46500000000002, 113.49250000000002, 113.52000000000001,<br>113.54750000000001, 113.57500000000002, 113.60250000000002,<br>113.63000000000001, 113.65750000000001, 113.68500000000002,<br>113.71250000000002, 113.74000000000001, 113.76750000000001,<br>113.79500000000002, 113.82250000000002, 113.85000000000001,<br>113.87750000000001, 113.90500000000002, 113.93250000000002,<br>113.96000000000001, 113.98750000000001, 114.01500000000001,<br>114.04250000000002, 114.07000000000002, 114.09750000000001,<br>114.12500000000001, 114.15250000000002, 114.18000000000002,<br>114.20750000000001, 114.23500000000001, 114.26250000000002,<br>114.29000000000002, 114.31750000000001, 114.34500000000001,<br>114.37250000000002, 114.40000000000002, 114.42750000000001,<br>114.45500000000001, 114.48250000000002, 114.51000000000002,<br>114.53750000000001, 114.56500000000001, 114.59250000000002,<br>114.62000000000002, 114.64750000000001, 114.67500000000001,<br>114.70250000000001, 114.73000000000002, 114.75750000000002,<br>114.78500000000001, 114.81250000000001, 114.84000000000002,<br>114.86750000000002, 114.89500000000001, 114.92250000000001,<br>114.95000000000002, 114.97750000000002, 115.00500000000001,<br>115.03250000000001, 115.06000000000002, 115.08750000000002,<br>115.11500000000001, 115.14250000000001, 115.17000000000002,<br>115.19750000000002, 115.22500000000001, 115.25250000000001,<br>115.28000000000002, 115.30750000000002, 115.33500000000001,<br>115.36250000000001, 115.39000000000001, 115.41750000000002,<br>115.44500000000002, 115.47250000000001, 115.50000000000001,<br>115.52750000000002, 115.55500000000002, 115.58250000000001,<br>115.61000000000001, 115.63750000000002, 115.66500000000002,<br>115.69250000000001, 115.72000000000001, 115.74750000000002,<br>115.77500000000002, 115.80250000000001, 115.83000000000001,<br>115.85750000000002, 115.88500000000002, 115.91250000000001,<br>115.94000000000001, 115.96750000000002, 115.99500000000002,<br>116.02250000000001, 116.05000000000001, 116.07750000000001, |

| Description | Value                                                                                                                                                                                                                                                                                                                                                                                                                                                                                                                                                                                                                                                                                                                                                                                                                                                                                                                                                                                                                                                                                                                                                                                                                                                                                                                                                                                                                                                                                                                                                                                                                                                                                                                                                                                                                                                                                                                                                                                                                                                                                                                                                                                                                                                                                                                                                                                                                                                                                                                                                                                                                                                                                                                                                                                                                                                                                                                                                                                                                                                                                                                                        |
|-------------|----------------------------------------------------------------------------------------------------------------------------------------------------------------------------------------------------------------------------------------------------------------------------------------------------------------------------------------------------------------------------------------------------------------------------------------------------------------------------------------------------------------------------------------------------------------------------------------------------------------------------------------------------------------------------------------------------------------------------------------------------------------------------------------------------------------------------------------------------------------------------------------------------------------------------------------------------------------------------------------------------------------------------------------------------------------------------------------------------------------------------------------------------------------------------------------------------------------------------------------------------------------------------------------------------------------------------------------------------------------------------------------------------------------------------------------------------------------------------------------------------------------------------------------------------------------------------------------------------------------------------------------------------------------------------------------------------------------------------------------------------------------------------------------------------------------------------------------------------------------------------------------------------------------------------------------------------------------------------------------------------------------------------------------------------------------------------------------------------------------------------------------------------------------------------------------------------------------------------------------------------------------------------------------------------------------------------------------------------------------------------------------------------------------------------------------------------------------------------------------------------------------------------------------------------------------------------------------------------------------------------------------------------------------------------------------------------------------------------------------------------------------------------------------------------------------------------------------------------------------------------------------------------------------------------------------------------------------------------------------------------------------------------------------------------------------------------------------------------------------------------------------------|
|             | 116.10500000000002, 116.13250000000002, 116.16000000000001,<br>116.18750000000001, 116.21500000000002, 116.24250000000002,<br>116.27000000000001, 116.29750000000001, 116.32500000000002,<br>116.35250000000002, 116.38000000000001, 116.40750000000001,<br>116.43500000000002, 116.46250000000002, 116.49000000000001,<br>116.51750000000001, 116.54500000000002, 116.57250000000002,<br>116.60000000000001, 116.62750000000001, 116.65500000000002,<br>116.68250000000002, 116.71000000000001, 116.73750000000001,<br>116.76500000000001, 116.79250000000002, 116.82000000000002,<br>116.84750000000001, 116.87500000000001, 116.90250000000002,<br>116.93000000000002, 116.95750000000001, 116.98500000000001,<br>117.01250000000002, 117.04000000000002, 117.06750000000001,<br>117.09500000000001, 117.12250000000002, 117.15000000000002,<br>117.17750000000001, 117.20500000000001, 117.23250000000002,<br>117.26000000000002, 117.28750000000001, 117.31500000000001,<br>117.34250000000002, 117.37000000000002, 117.39750000000001,<br>117.42500000000001, 117.45250000000001, 117.48000000000002,<br>117.50750000000002, 117.53500000000001, 117.56250000000001,<br>117.59000000000002, 117.61750000000002, 117.64500000000001,<br>117.67250000000001, 117.70000000000002, 117.72750000000002,<br>117.75500000000001, 117.78250000000001, 117.81000000000002,<br>117.83750000000002, 117.86500000000001, 117.89250000000001,<br>117.92000000000002, 117.94750000000002, 117.97500000000002,<br>118.00250000000001, 118.03000000000002, 118.05750000000002,<br>118.08500000000001, 118.11250000000001, 118.14000000000001,<br>118.16750000000002, 118.19500000000002, 118.22250000000001,<br>118.25000000000001, 118.27750000000002, 118.30500000000002,<br>118.33250000000001, 118.36000000000001, 118.38750000000002,<br>118.41500000000002, 118.44250000000001, 118.47000000000001,<br>118.49750000000002, 118.52500000000002, 118.55250000000001,<br>118.58000000000001, 118.60750000000002, 118.63500000000002,<br>118.66250000000002, 118.69000000000001, 118.71750000000002,<br>118.74500000000002, 118.77250000000001, 118.80000000000001,<br>118.82750000000001, 118.85500000000002, 118.88250000000002,<br>118.91000000000001, 118.93750000000001, 118.96500000000002,<br>118.99250000000002, 119.02000000000001, 119.04750000000001,<br>119.07500000000002, 119.10250000000002, 119.13000000000001,<br>119.15750000000001, 119.18500000000002, 119.21250000000002,<br>119.24000000000001, 119.26750000000001, 119.29500000000002,<br>119.32250000000002, 119.35000000000002, 119.37750000000001,<br>119.40500000000002, 119.43250000000002, 119.46000000000001,<br>119.48750000000001, 119.51500000000001, 119.54250000000002,<br>119.57000000000002, 119.59750000000001, 119.62500000000001,<br>119.65250000000002, 119.68000000000002, 119.70750000000001,<br>119.73500000000001, 119.76250000000002, 119.79000000000002,<br>119.81750000000001, 119.84500000000001, 119.87250000000002,<br>119.90000000000002, 119.92750000000001, 119.95500000000001,<br>119.98250000000002, 120.01000000000002, 120.03750000000002, |



| Description | Value                                                                                                                                                                                                                                                                                                                                                                                                                                                                                                                                                                                                                                                                                                                                                                                                                                                                                                                                                                                                                                                                                                                                                                                                                                                                                                                                                                                                                                                                                                                                                                                                                                                                                                                                                                                                                                                                                                                                                                                                                                                                                                                                                                                                                                                                                                                                                                                                                                                                                                                                                                                                                                                                                                                                                                                                                                                                                                                                                                                                                                                                                                                                        |
|-------------|----------------------------------------------------------------------------------------------------------------------------------------------------------------------------------------------------------------------------------------------------------------------------------------------------------------------------------------------------------------------------------------------------------------------------------------------------------------------------------------------------------------------------------------------------------------------------------------------------------------------------------------------------------------------------------------------------------------------------------------------------------------------------------------------------------------------------------------------------------------------------------------------------------------------------------------------------------------------------------------------------------------------------------------------------------------------------------------------------------------------------------------------------------------------------------------------------------------------------------------------------------------------------------------------------------------------------------------------------------------------------------------------------------------------------------------------------------------------------------------------------------------------------------------------------------------------------------------------------------------------------------------------------------------------------------------------------------------------------------------------------------------------------------------------------------------------------------------------------------------------------------------------------------------------------------------------------------------------------------------------------------------------------------------------------------------------------------------------------------------------------------------------------------------------------------------------------------------------------------------------------------------------------------------------------------------------------------------------------------------------------------------------------------------------------------------------------------------------------------------------------------------------------------------------------------------------------------------------------------------------------------------------------------------------------------------------------------------------------------------------------------------------------------------------------------------------------------------------------------------------------------------------------------------------------------------------------------------------------------------------------------------------------------------------------------------------------------------------------------------------------------------------|
|             | 120.06500000000001, 120.09250000000002, 120.12000000000002,<br>120.14750000000001, 120.17500000000001, 120.20250000000001,<br>120.23000000000002, 120.25750000000002, 120.28500000000001,<br>120.31250000000001, 120.34000000000002, 120.36750000000002,<br>120.39500000000001, 120.42250000000001, 120.45000000000002,<br>120.47750000000002, 120.50500000000001, 120.53250000000001,<br>120.56000000000002, 120.58750000000002, 120.61500000000001,<br>120.64250000000001, 120.67000000000002, 120.69750000000002,<br>120.72500000000002, 120.75250000000001, 120.78000000000002,<br>120.80750000000002, 120.83500000000001, 120.86250000000001,<br>120.89000000000001, 120.91750000000002, 120.94500000000002,<br>120.97250000000001, 121.00000000000001, 121.02750000000002,<br>121.05500000000002, 121.08250000000001, 121.11000000000001,<br>121.13750000000002, 121.16500000000002, 121.19250000000001,<br>121.22000000000001, 121.24750000000002, 121.27500000000002,<br>121.30250000000001, 121.33000000000001, 121.35750000000002,<br>121.38500000000002, 121.41250000000002, 121.44000000000001,<br>121.46750000000002, 121.49500000000002, 121.52250000000001,<br>121.55000000000001, 121.57750000000001, 121.60500000000002,<br>121.63250000000002, 121.66000000000001, 121.68750000000001,<br>121.71500000000002, 121.74250000000002, 121.77000000000001,<br>121.79750000000001, 121.82500000000002, 121.85250000000002,<br>121.88000000000001, 121.90750000000001, 121.93500000000002,<br>121.96250000000002, 121.99000000000001, 122.01750000000001,<br>122.04500000000002, 122.07250000000002, 122.10000000000002,<br>122.12750000000001, 122.15500000000002, 122.18250000000002,<br>122.21000000000001, 122.23750000000001, 122.26500000000001,<br>122.29250000000002, 122.32000000000002, 122.34750000000001,<br>122.37500000000001, 122.40250000000002, 122.43000000000002,<br>122.45750000000001, 122.48500000000001, 122.51250000000002,<br>122.54000000000002, 122.56750000000001, 122.59500000000001,<br>122.62250000000002, 122.65000000000002, 122.67750000000001,<br>122.70500000000001, 122.73250000000002, 122.76000000000002,<br>122.78750000000002, 122.81500000000001, 122.84250000000002,<br>122.87000000000002, 122.89750000000001, 122.92500000000001,<br>122.95250000000001, 122.98000000000002, 123.00750000000002,<br>123.03500000000001, 123.06250000000001, 123.09000000000002,<br>123.11750000000002, 123.14500000000001, 123.17250000000001,<br>123.20000000000002, 123.22750000000002, 123.25500000000002,<br>123.28250000000001, 123.31000000000002, 123.33750000000002,<br>123.36500000000001, 123.39250000000001, 123.42000000000002,<br>123.44750000000002, 123.47500000000002, 123.50250000000001,<br>123.53000000000002, 123.55750000000002, 123.58500000000002,<br>123.61250000000001, 123.64000000000001, 123.66750000000002,<br>123.69500000000002, 123.72250000000001, 123.75000000000001,<br>123.77750000000002, 123.80500000000002, 123.83250000000001,<br>123.86000000000001, 123.88750000000002, 123.91500000000002,<br>123.94250000000002, 123.97000000000001, 123.99750000000002, |

| Description | Value                                                                                                                                                                                                                                                                                                                                                                                                                                                                                                                                                                                                                                                                                                                                                                                                                                                                                                                                                                                                                                                                                                                                                                                                                                                                                                                                                                                                                                                                                                                                                                                                                                                                                                                                                                                                                                                                                                                                                                                                                                                                                                                                                                                                                                                                                                                                                                                                                                                                                                                                                                                                                                                                                                                                                                                                                                                                                                                                                                                                                                                                                                                                        |
|-------------|----------------------------------------------------------------------------------------------------------------------------------------------------------------------------------------------------------------------------------------------------------------------------------------------------------------------------------------------------------------------------------------------------------------------------------------------------------------------------------------------------------------------------------------------------------------------------------------------------------------------------------------------------------------------------------------------------------------------------------------------------------------------------------------------------------------------------------------------------------------------------------------------------------------------------------------------------------------------------------------------------------------------------------------------------------------------------------------------------------------------------------------------------------------------------------------------------------------------------------------------------------------------------------------------------------------------------------------------------------------------------------------------------------------------------------------------------------------------------------------------------------------------------------------------------------------------------------------------------------------------------------------------------------------------------------------------------------------------------------------------------------------------------------------------------------------------------------------------------------------------------------------------------------------------------------------------------------------------------------------------------------------------------------------------------------------------------------------------------------------------------------------------------------------------------------------------------------------------------------------------------------------------------------------------------------------------------------------------------------------------------------------------------------------------------------------------------------------------------------------------------------------------------------------------------------------------------------------------------------------------------------------------------------------------------------------------------------------------------------------------------------------------------------------------------------------------------------------------------------------------------------------------------------------------------------------------------------------------------------------------------------------------------------------------------------------------------------------------------------------------------------------------|
|             | 124.02500000000002, 124.05250000000001, 124.08000000000001,<br>124.10750000000002, 124.13500000000002, 124.16250000000002,<br>124.19000000000001, 124.21750000000002, 124.24500000000002,<br>124.27250000000002, 124.30000000000001, 124.32750000000001,<br>124.35500000000002, 124.38250000000002, 124.41000000000001,<br>124.43750000000001, 124.46500000000002, 124.49250000000002,<br>124.52000000000001, 124.54750000000001, 124.57500000000002,<br>124.60250000000002, 124.63000000000002, 124.65750000000001,<br>124.68500000000002, 124.71250000000002, 124.74000000000001,<br>124.76750000000001, 124.79500000000002, 124.82250000000002,<br>124.85000000000002, 124.87750000000001, 124.90500000000002,<br>124.93250000000002, 124.96000000000002, 124.98750000000001,<br>125.01500000000001, 125.04250000000002, 125.07000000000002,<br>125.09750000000001, 125.12500000000001, 125.15250000000002,<br>125.18000000000002, 125.20750000000001, 125.23500000000001,<br>125.26250000000002, 125.29000000000002, 125.31750000000002,<br>125.34500000000001, 125.37250000000002, 125.40000000000002,<br>125.42750000000001, 125.45500000000001, 125.48250000000002,<br>125.51000000000002, 125.53750000000002, 125.56500000000001,<br>125.59250000000002, 125.62000000000002, 125.64750000000002,<br>125.67500000000001, 125.70250000000001, 125.73000000000002,<br>125.75750000000002, 125.78500000000001, 125.81250000000001,<br>125.84000000000002, 125.86750000000002, 125.89500000000001,<br>125.92250000000001, 125.95000000000002, 125.97750000000002,<br>126.00500000000002, 126.03250000000001, 126.06000000000002,<br>126.08750000000002, 126.11500000000001, 126.14250000000001,<br>126.17000000000002, 126.19750000000002, 126.22500000000002,<br>126.25250000000001, 126.28000000000002, 126.30750000000002,<br>126.33500000000001, 126.36250000000001, 126.39000000000001,<br>126.41750000000002, 126.44500000000002, 126.47250000000003,<br>126.50000000000001, 126.52750000000002, 126.55500000000002,<br>126.58250000000001, 126.61000000000001, 126.63750000000002,<br>126.66500000000002, 126.69250000000002, 126.72000000000001,<br>126.74750000000002, 126.77500000000002, 126.80250000000001,<br>126.83000000000001, 126.85750000000002, 126.88500000000002,<br>126.91250000000002, 126.94000000000001, 126.96750000000002,<br>126.99500000000002, 127.02250000000001, 127.05000000000001,<br>127.07750000000001, 127.10500000000002, 127.13250000000002,<br>127.16000000000003, 127.18750000000001, 127.21500000000002,<br>127.24250000000002, 127.27000000000001, 127.29750000000001,<br>127.32500000000002, 127.35250000000002, 127.38000000000002,<br>127.40750000000001, 127.43500000000002, 127.46250000000002,<br>127.49000000000001, 127.51750000000001, 127.54500000000002,<br>127.57250000000002, 127.60000000000002, 127.62750000000001,<br>127.65500000000002, 127.68250000000002, 127.71000000000001,<br>127.73750000000001, 127.76500000000001, 127.79250000000002,<br>127.82000000000002, 127.84750000000003, 127.87500000000001,<br>127.90250000000002, 127.93000000000002, 127.95750000000001, |

| Description | Value                                                                                                                                                                                                                                                                                                                                                                                                                                                                                                                                                                                                                                                                                                                                                                                                                                                                                                                                                                                                                                                                                                                                                                                                                                                                                                                                                                                                                                                                                                                                                                                                                                                                                                                                                                                                                                                                                                                                                                                                                                                                                                                                                                                                                                                                                                                                                                                                                                                                                                                                                                                                                                                                                                                                                                                                                                                                                                                                                                                                                                                                                                                                                                                                                                                                           |
|-------------|---------------------------------------------------------------------------------------------------------------------------------------------------------------------------------------------------------------------------------------------------------------------------------------------------------------------------------------------------------------------------------------------------------------------------------------------------------------------------------------------------------------------------------------------------------------------------------------------------------------------------------------------------------------------------------------------------------------------------------------------------------------------------------------------------------------------------------------------------------------------------------------------------------------------------------------------------------------------------------------------------------------------------------------------------------------------------------------------------------------------------------------------------------------------------------------------------------------------------------------------------------------------------------------------------------------------------------------------------------------------------------------------------------------------------------------------------------------------------------------------------------------------------------------------------------------------------------------------------------------------------------------------------------------------------------------------------------------------------------------------------------------------------------------------------------------------------------------------------------------------------------------------------------------------------------------------------------------------------------------------------------------------------------------------------------------------------------------------------------------------------------------------------------------------------------------------------------------------------------------------------------------------------------------------------------------------------------------------------------------------------------------------------------------------------------------------------------------------------------------------------------------------------------------------------------------------------------------------------------------------------------------------------------------------------------------------------------------------------------------------------------------------------------------------------------------------------------------------------------------------------------------------------------------------------------------------------------------------------------------------------------------------------------------------------------------------------------------------------------------------------------------------------------------------------------------------------------------------------------------------------------------------------------|
|             | 127.98500000000001, 128.01250000000002, 128.04000000000002,<br>128.06750000000002, 128.09500000000003, 128.1225, 128.15, 128.1775,<br>128.205, 128.23250000000002, 128.26000000000002,<br>128.28750000000002, 128.31500000000003, 128.34250000000003, 128.37,<br>128.3975, 128.425, 128.45250000000001, 128.48000000000002,<br>128.50750000000002, 128.53500000000003, 128.56250000000003,<br>128.59000000000003, 128.6175, 128.645, 128.6725, 128.70000000000002,<br>128.72750000000002, 128.75500000000002, 128.78250000000003, 128.81,<br>128.8375, 128.865, 128.8925, 128.92000000000002, 128.94750000000002,<br>128.97500000000002, 129.00250000000003, 129.03000000000003,<br>129.0575, 129.085, 129.1125, 129.14000000000001, 129.16750000000002,<br>129.19500000000002, 129.22250000000003, 129.25000000000003,<br>129.27750000000003, 129.305, 129.3325, 129.36, 129.38750000000002,<br>129.41500000000002, 129.44250000000002, 129.47000000000003,<br>129.4975, 129.525, 129.5525, 129.58, 129.60750000000002,<br>129.63500000000002, 129.66250000000002, 129.69000000000003,<br>129.71750000000003, 129.745, 129.7725, 129.8, 129.82750000000001,<br>129.85500000000002, 129.88250000000002, 129.91000000000003,<br>129.93750000000003, 129.96500000000003, 129.9925, 130.02, 130.0475,<br>130.07500000000002, 130.10250000000002, 130.13000000000002,<br>130.15750000000003, 130.185, 130.2125, 130.24, 130.2675,<br>130.29500000000002, 130.32250000000002, 130.35000000000002,<br>130.37750000000003, 130.40500000000003, 130.4325, 130.46, 130.4875,<br>130.51500000000001, 130.54250000000002, 130.57000000000002,<br>130.59750000000003, 130.62500000000003, 130.65250000000003, 130.68,<br>130.7075, 130.735, 130.76250000000002, 130.79000000000002,<br>130.81750000000002, 130.84500000000003, 130.8725, 130.9, 130.9275,<br>130.955, 130.98250000000002, 131.01000000000002,<br>131.03750000000002, 131.06500000000003, 131.09250000000003, 131.12,<br>131.1475, 131.175, 131.20250000000001, 131.23000000000002,<br>131.25750000000002, 131.28500000000003, 131.31250000000003,<br>131.34000000000003, 131.3675, 131.395, 131.4225, 131.45000000000002,<br>131.47750000000002, 131.50500000000002, 131.53250000000003, 131.56,<br>131.5875, 131.615, 131.6425, 131.67000000000002, 131.69750000000002,<br>131.72500000000002, 131.75250000000003, 131.78000000000003,<br>131.8075, 131.835, 131.8625, 131.89000000000001, 131.91750000000002,<br>131.94500000000002, 131.97250000000003, 132.00000000000003,<br>132.02750000000003, 132.055, 132.0825, 132.11, 132.13750000000002,<br>132.16500000000002, 132.19250000000002, 132.22000000000003,<br>132.2475, 132.275, 132.3025, 132.33, 132.35750000000002,<br>132.38500000000002, 132.41250000000002, 132.44000000000003,<br>132.46750000000003, 132.495, 132.5225, 132.55, 132.57750000000001,<br>132.60500000000002, 132.63250000000002, 132.66000000000003,<br>132.68750000000003, 132.71500000000003, 132.7425, 132.77, 132.7975,<br>132.82500000000002, 132.85250000000002, 132.88000000000002,<br>132.90750000000003, 132.935, 132.9625, 132.99, 133.0175,<br>133.04500000000002, 133.07250000000002, 133.10000000000002,<br>133.12750000000003, 133.15500000000003, 133.1825, 133.21, 133.2375, |

| Description | Value                                                                                                                                                                                                                                                                                                                                                                                                                                                                                                                                                                                                                                                                                                                                                                                                                                                                                                                                                                                                                                                                                                                                                                                                                                                                                                                                                                                                                                                                                                                                                                                                                                                                                                                                                                                                                                                                                                                                                                                                                                                                                                                                                                                                                                                                                                                                                                                                                                                                                                                                                                                                                                                                                                                                                                                                                                                                                                                                                                                                                                                                                                                                                                                                                                                                          |
|-------------|--------------------------------------------------------------------------------------------------------------------------------------------------------------------------------------------------------------------------------------------------------------------------------------------------------------------------------------------------------------------------------------------------------------------------------------------------------------------------------------------------------------------------------------------------------------------------------------------------------------------------------------------------------------------------------------------------------------------------------------------------------------------------------------------------------------------------------------------------------------------------------------------------------------------------------------------------------------------------------------------------------------------------------------------------------------------------------------------------------------------------------------------------------------------------------------------------------------------------------------------------------------------------------------------------------------------------------------------------------------------------------------------------------------------------------------------------------------------------------------------------------------------------------------------------------------------------------------------------------------------------------------------------------------------------------------------------------------------------------------------------------------------------------------------------------------------------------------------------------------------------------------------------------------------------------------------------------------------------------------------------------------------------------------------------------------------------------------------------------------------------------------------------------------------------------------------------------------------------------------------------------------------------------------------------------------------------------------------------------------------------------------------------------------------------------------------------------------------------------------------------------------------------------------------------------------------------------------------------------------------------------------------------------------------------------------------------------------------------------------------------------------------------------------------------------------------------------------------------------------------------------------------------------------------------------------------------------------------------------------------------------------------------------------------------------------------------------------------------------------------------------------------------------------------------------------------------------------------------------------------------------------------------------|
|             | 133.26500000000001, 133.29250000000002, 133.32000000000002,<br>133.34750000000003, 133.37500000000003, 133.40250000000003, 133.43,<br>133.4575, 133.485, 133.51250000000002, 133.54000000000002,<br>133.56750000000002, 133.59500000000003, 133.6225, 133.65, 133.6775,<br>133.705, 133.73250000000002, 133.76000000000002,<br>133.78750000000002, 133.81500000000003, 133.84250000000003, 133.87,<br>133.8975, 133.925, 133.95250000000001, 133.98000000000002,<br>134.00750000000002, 134.03500000000003, 134.06250000000003,<br>134.09000000000003, 134.1175, 134.145, 134.1725, 134.20000000000002,<br>134.22750000000002, 134.25500000000002, 134.28250000000003, 134.31,<br>134.3375, 134.365, 134.3925, 134.42000000000002, 134.44750000000002,<br>134.47500000000002, 134.50250000000003, 134.53000000000003,<br>134.5575, 134.585, 134.6125, 134.64000000000001, 134.66750000000002,<br>134.69500000000002, 134.72250000000003, 134.75000000000003,<br>134.77750000000003, 134.805, 134.8325, 134.86, 134.88750000000002,<br>134.91500000000002, 134.94250000000002, 134.97000000000003,<br>134.9975, 135.025, 135.0525, 135.08, 135.10750000000002,<br>135.13500000000002, 135.16250000000002, 135.19000000000003,<br>135.21750000000003, 135.245, 135.2725, 135.3, 135.32750000000001,<br>135.35500000000002, 135.38250000000002, 135.41000000000003,<br>135.43750000000003, 135.46500000000003, 135.4925, 135.52, 135.5475,<br>135.57500000000002, 135.60250000000002, 135.63000000000002,<br>135.65750000000003, 135.685, 135.7125, 135.74, 135.7675,<br>135.79500000000002, 135.82250000000002, 135.85000000000002,<br>135.87750000000003, 135.90500000000003, 135.9325, 135.96, 135.9875,<br>136.01500000000001, 136.04250000000002, 136.07000000000002,<br>136.09750000000003, 136.12500000000003, 136.15250000000003, 136.18,<br>136.2075, 136.235, 136.26250000000002, 136.29000000000002,<br>136.31750000000002, 136.34500000000003, 136.3725, 136.4, 136.4275,<br>136.455, 136.48250000000002, 136.51000000000002,<br>136.53750000000002, 136.56500000000003, 136.59250000000003, 136.62,<br>136.6475, 136.675, 136.70250000000001, 136.73000000000002,<br>136.75750000000002, 136.78500000000003, 136.81250000000003,<br>136.84000000000003, 136.8675, 136.895, 136.9225, 136.95000000000002,<br>136.97750000000002, 137.00500000000002, 137.03250000000003, 137.06,<br>137.0875, 137.115, 137.1425, 137.17000000000002, 137.19750000000002,<br>137.22500000000002, 137.25250000000003, 137.28000000000003,<br>137.3075, 137.335, 137.3625, 137.39000000000001, 137.41750000000002,<br>137.44500000000002, 137.47250000000003, 137.50000000000003,<br>137.52750000000003, 137.555, 137.5825, 137.61, 137.63750000000002,<br>137.66500000000002, 137.69250000000002, 137.72000000000003,<br>137.7475, 137.775, 137.8025, 137.83, 137.85750000000002,<br>137.88500000000002, 137.91250000000002, 137.94000000000003,<br>137.96750000000003, 137.995, 138.0225, 138.05, 138.07750000000001,<br>138.10500000000002, 138.13250000000002, 138.16000000000003,<br>138.18750000000003, 138.21500000000003, 138.2425, 138.27, 138.2975,<br>138.32500000000002, 138.35250000000002, 138.38000000000002,<br>138.40750000000003, 138.435, 138.4625, 138.49, 138.5175, |

| Description | Value                                                                                                                                                                                                                                                                                                                                                                                                                                                                                                                                                                                                                                                                                                                                                                                                                                                                                                                                                                                                                                                                                                                                                                                                                                                                                                                                                                                                                                                                                                                                                                                                                                                                                                                                                                                                                                                                                                                                                                                                                                                                                                                                                                                                                                                                                                                                                                                                                                                                                                                                                                                                                                                                                                                                                                                                                                                                                                                                                                                                                                                                                                                                                                                                                                                                                   |
|-------------|-----------------------------------------------------------------------------------------------------------------------------------------------------------------------------------------------------------------------------------------------------------------------------------------------------------------------------------------------------------------------------------------------------------------------------------------------------------------------------------------------------------------------------------------------------------------------------------------------------------------------------------------------------------------------------------------------------------------------------------------------------------------------------------------------------------------------------------------------------------------------------------------------------------------------------------------------------------------------------------------------------------------------------------------------------------------------------------------------------------------------------------------------------------------------------------------------------------------------------------------------------------------------------------------------------------------------------------------------------------------------------------------------------------------------------------------------------------------------------------------------------------------------------------------------------------------------------------------------------------------------------------------------------------------------------------------------------------------------------------------------------------------------------------------------------------------------------------------------------------------------------------------------------------------------------------------------------------------------------------------------------------------------------------------------------------------------------------------------------------------------------------------------------------------------------------------------------------------------------------------------------------------------------------------------------------------------------------------------------------------------------------------------------------------------------------------------------------------------------------------------------------------------------------------------------------------------------------------------------------------------------------------------------------------------------------------------------------------------------------------------------------------------------------------------------------------------------------------------------------------------------------------------------------------------------------------------------------------------------------------------------------------------------------------------------------------------------------------------------------------------------------------------------------------------------------------------------------------------------------------------------------------------------------------|
|             | 138.54500000000002, 138.57250000000002, 138.60000000000002,<br>138.62750000000003, 138.65500000000003, 138.6825, 138.71, 138.7375,<br>138.76500000000001, 138.79250000000002, 138.82000000000002,<br>138.84750000000003, 138.87500000000003, 138.90250000000003, 138.93,<br>138.9575, 138.985, 139.01250000000002, 139.04000000000002,<br>139.06750000000002, 139.09500000000003, 139.1225, 139.15, 139.1775,<br>139.205, 139.23250000000002, 139.26000000000002,<br>139.28750000000002, 139.31500000000003, 139.34250000000003, 139.37,<br>139.3975, 139.425, 139.45250000000001, 139.48000000000002,<br>139.50750000000002, 139.53500000000003, 139.56250000000003,<br>139.59000000000003, 139.6175, 139.645, 139.6725, 139.70000000000002,<br>139.72750000000002, 139.75500000000002, 139.78250000000003, 139.81,<br>139.83750000000003, 139.865, 139.8925, 139.92000000000002,<br>139.94750000000002, 139.97500000000002, 140.00250000000003,<br>140.03000000000003, 140.0575, 140.085, 140.1125, 140.14000000000001,<br>140.16750000000002, 140.19500000000002, 140.22250000000003,<br>140.25000000000003, 140.27750000000003, 140.305, 140.3325, 140.36,<br>140.38750000000002, 140.41500000000002, 140.44250000000002,<br>140.47000000000003, 140.4975, 140.52500000000003, 140.5525, 140.58,<br>140.60750000000002, 140.63500000000002, 140.66250000000002,<br>140.69000000000003, 140.71750000000003, 140.745, 140.7725, 140.8,<br>140.82750000000001, 140.85500000000002, 140.88250000000002,<br>140.91000000000003, 140.93750000000003, 140.96500000000003,<br>140.9925, 141.02, 141.0475, 141.07500000000002, 141.10250000000002,<br>141.13000000000002, 141.15750000000003, 141.18500000000003,<br>141.21250000000003, 141.24, 141.2675, 141.29500000000002,<br>141.32250000000002, 141.35000000000002, 141.37750000000003,<br>141.40500000000003, 141.4325, 141.46, 141.4875, 141.51500000000001,<br>141.54250000000002, 141.57000000000002, 141.59750000000003,<br>141.62500000000003, 141.65250000000003, 141.68, 141.7075, 141.735,<br>141.76250000000002, 141.79000000000002, 141.81750000000002,<br>141.84500000000003, 141.87250000000003, 141.90000000000003,<br>141.9275, 141.955, 141.98250000000002, 142.01000000000002,<br>142.03750000000002, 142.06500000000003, 142.09250000000003, 142.12,<br>142.1475, 142.175, 142.20250000000001, 142.23000000000002,<br>142.25750000000002, 142.28500000000003, 142.31250000000003,<br>142.34000000000003, 142.3675, 142.395, 142.4225, 142.45000000000002,<br>142.47750000000002, 142.50500000000002, 142.53250000000003, 142.56,<br>142.58750000000003, 142.615, 142.6425, 142.67000000000002,<br>142.69750000000002, 142.72500000000002, 142.75250000000003,<br>142.78000000000003, 142.8075, 142.835, 142.8625, 142.89000000000001,<br>142.91750000000002, 142.94500000000002, 142.97250000000003,<br>143.00000000000003, 143.02750000000003, 143.055, 143.0825, 143.11,<br>143.13750000000002, 143.16500000000002, 143.19250000000002,<br>143.22000000000003, 143.2475, 143.27500000000003, 143.3025, 143.33,<br>143.35750000000002, 143.38500000000002, 143.41250000000002,<br>143.44000000000003, 143.46750000000003, 143.495, 143.5225, 143.55,<br>143.57750000000001, 143.60500000000002, 143.63250000000002, |

| Description | Value                                                                                                                                                                                                                                                                                                                                                                                                                                                                                                                                                                                                                                                                                                                                                                                                                                                                                                                                                                                                                                                                                                                                                                                                                                                                                                                                                                                                                                                                                                                                                                                                                                                                                                                                                                                                                                                                                                                                                                                                                                                                                                                                                                                                                                                                                                                                                                                                                                                                                                                                                                                                                                                                                                                                                                                                                                                                                                                                                                                                                                                       |
|-------------|-------------------------------------------------------------------------------------------------------------------------------------------------------------------------------------------------------------------------------------------------------------------------------------------------------------------------------------------------------------------------------------------------------------------------------------------------------------------------------------------------------------------------------------------------------------------------------------------------------------------------------------------------------------------------------------------------------------------------------------------------------------------------------------------------------------------------------------------------------------------------------------------------------------------------------------------------------------------------------------------------------------------------------------------------------------------------------------------------------------------------------------------------------------------------------------------------------------------------------------------------------------------------------------------------------------------------------------------------------------------------------------------------------------------------------------------------------------------------------------------------------------------------------------------------------------------------------------------------------------------------------------------------------------------------------------------------------------------------------------------------------------------------------------------------------------------------------------------------------------------------------------------------------------------------------------------------------------------------------------------------------------------------------------------------------------------------------------------------------------------------------------------------------------------------------------------------------------------------------------------------------------------------------------------------------------------------------------------------------------------------------------------------------------------------------------------------------------------------------------------------------------------------------------------------------------------------------------------------------------------------------------------------------------------------------------------------------------------------------------------------------------------------------------------------------------------------------------------------------------------------------------------------------------------------------------------------------------------------------------------------------------------------------------------------------------|
|             | 143.6600000000003, 143.6875000000003, 143.7150000000003,<br>143.7425, 143.77, 143.7975, 143.8250000000002, 143.8525000000002,<br>143.8800000000002, 143.9075000000003, 143.935,<br>143.9625000000003, 143.99, 144.0175, 144.0450000000002,<br>144.0725000000002, 144.1000000000002, 144.1275000000003,<br>144.1550000000003, 144.1825, 144.2100000000004, 144.2375,<br>144.2650000000001, 144.2925000000002, 144.3200000000002,<br>144.3475000000003, 144.3750000000003, 144.4025000000003, 144.43,<br>144.4575, 144.485, 144.5125000000002, 144.5400000000002,<br>144.5675000000002, 144.5950000000003, 144.6225,<br>144.6500000000003, 144.6775, 144.705, 144.7325000000002,<br>144.7600000000002, 144.7875000000002, 144.8150000000003,<br>144.8425000000003, 144.87, 144.8975000000004, 144.925,<br>144.9525000000001, 144.9800000000002, 145.0075000000002,<br>145.0350000000003, 145.0625000000003, 145.0900000000003,<br>145.1175, 145.145, 145.1725, 145.2000000000002, 145.2275000000002,<br>145.2550000000002, 145.2825000000003, 145.31, 145.3375000000003,<br>145.365, 145.3925, 145.4200000000002, 145.4475000000002,<br>145.4750000000002, 145.5025000000003, 145.5300000000003,<br>145.5575, 145.5850000000004, 145.6125, 145.6400000000001,<br>145.6675000000002, 145.6950000000002, 145.7225000000003,<br>145.7500000000003, 145.7775000000003, 145.805, 145.8325, 145.86,<br>145.8875000000002, 145.9150000000002, 145.9425000000002,<br>145.9700000000003, 145.9975, 146.0250000000003, 146.0525, 146.08,<br>146.1075000000002, 146.1350000000002, 146.1625000000002,<br>146.1900000000003, 146.2175000000003, 146.245,<br>146.2725000000004, 146.3, 146.3275000000001, 146.3550000000002,<br>146.3825000000002, 146.4100000000003, 146.4375000000003,<br>146.4650000000003, 146.4925, 146.52, 146.5475, 146.5750000000002,<br>146.6025000000002, 146.6300000000002, 146.6575000000003,<br>146.685, 146.7125000000003, 146.74, 146.7675, 146.7950000000002,<br>146.8225000000002, 146.8500000000002, 146.8775000000003,<br>146.9050000000003, 146.9325, 146.9600000000004, 146.9875,<br>147.0150000000001, 147.0425000000002, 147.0700000000002,<br>147.0975000000003, 147.1250000000003, 147.1525000000003, 147.18,<br>147.2075, 147.235, 147.2625000000002, 147.2900000000002,<br>147.3175000000002, 147.3450000000003, 147.3725,<br>147.4000000000003, 147.4275, 147.455, 147.4825000000002,<br>147.5100000000002, 147.5375000000002, 147.5650000000003,<br>147.5925000000003, 147.62, 147.6475000000004, 147.675,<br>147.7025000000001, 147.7300000000002, 147.7575000000002,<br>147.7850000000003, 147.8125000000003, 147.8400000000003,<br>147.8675, 147.895, 147.9225, 147.9500000000002, 147.9775000000002,<br>148.0050000000002, 148.0325000000003, 148.06, 148.0875000000003,<br>148.115, 148.1425, 148.1700000000002, 148.1975000000002,<br>148.2250000000002, 148.2525000000003, 148.2800000000003,<br>148.3075, 148.3350000000004, 148.3625, 148.3900000000001,<br>148.4175000000002, 148.4450000000002, 148.4725000000003, |

| Description | Value                                                                                                                                                                                                                                                                                                                                                                                                                                                                                                                                                                                                                                                                                                                                                                                                                                                                                                                                                                                                                                                                                                                                                                                                                                                                                                                                                                                                                                                                                                                                                                                                                                                                                                                                                                                                                                                                                                                                                                                                                                                                                                                                                                                                                                                                                                                                                                                                                                                                                                                                                                                                                                                                                                                                                                                                                                                                                                                                                                                                                                                                                                                                                                                               |
|-------------|-----------------------------------------------------------------------------------------------------------------------------------------------------------------------------------------------------------------------------------------------------------------------------------------------------------------------------------------------------------------------------------------------------------------------------------------------------------------------------------------------------------------------------------------------------------------------------------------------------------------------------------------------------------------------------------------------------------------------------------------------------------------------------------------------------------------------------------------------------------------------------------------------------------------------------------------------------------------------------------------------------------------------------------------------------------------------------------------------------------------------------------------------------------------------------------------------------------------------------------------------------------------------------------------------------------------------------------------------------------------------------------------------------------------------------------------------------------------------------------------------------------------------------------------------------------------------------------------------------------------------------------------------------------------------------------------------------------------------------------------------------------------------------------------------------------------------------------------------------------------------------------------------------------------------------------------------------------------------------------------------------------------------------------------------------------------------------------------------------------------------------------------------------------------------------------------------------------------------------------------------------------------------------------------------------------------------------------------------------------------------------------------------------------------------------------------------------------------------------------------------------------------------------------------------------------------------------------------------------------------------------------------------------------------------------------------------------------------------------------------------------------------------------------------------------------------------------------------------------------------------------------------------------------------------------------------------------------------------------------------------------------------------------------------------------------------------------------------------------------------------------------------------------------------------------------------------------|
|             | 148.50000000000003, 148.52750000000003, 148.555, 148.5825, 148.61,<br>148.63750000000002, 148.66500000000002, 148.69250000000002,<br>148.72000000000003, 148.7475, 148.77500000000003, 148.8025, 148.83,<br>148.85750000000002, 148.88500000000002, 148.91250000000002,<br>148.94000000000003, 148.96750000000003, 148.995,<br>149.02250000000004, 149.05, 149.07750000000001, 149.10500000000002,<br>149.13250000000002, 149.16000000000003, 149.18750000000003,<br>149.21500000000003, 149.2425, 149.27, 149.2975, 149.32500000000002,<br>149.35250000000002, 149.38000000000002, 149.40750000000003,<br>149.435, 149.46250000000003, 149.49, 149.5175, 149.54500000000002,<br>149.57250000000002, 149.60000000000002, 149.62750000000003,<br>149.65500000000003, 149.6825, 149.71000000000004, 149.7375,<br>149.76500000000001, 149.79250000000002, 149.82000000000002,<br>149.84750000000003, 149.87500000000003, 149.90250000000003, 149.93,<br>149.9575, 149.985, 150.01250000000002, 150.04000000000002,<br>150.06750000000002, 150.09500000000003, 150.1225,<br>150.15000000000003, 150.1775, 150.205, 150.23250000000002,<br>150.26000000000002, 150.28750000000002, 150.31500000000003,<br>150.34250000000003, 150.37, 150.39750000000004, 150.425,<br>150.45250000000001, 150.48000000000002, 150.50750000000002,<br>150.53500000000003, 150.56250000000003, 150.59000000000003,<br>150.6175, 150.645, 150.6725, 150.70000000000002, 150.72750000000002,<br>150.75500000000002, 150.78250000000003, 150.81, 150.83750000000003,<br>150.865, 150.8925, 150.92000000000002, 150.94750000000002,<br>150.97500000000002, 151.00250000000003, 151.03000000000003,<br>151.0575, 151.08500000000004, 151.1125, 151.14000000000001,<br>151.16750000000002, 151.19500000000002, 151.22250000000003,<br>151.25000000000003, 151.27750000000003, 151.305, 151.3325, 151.36,<br>151.38750000000002, 151.41500000000002, 151.44250000000002,<br>151.47000000000003, 151.4975, 151.52500000000003, 151.5525, 151.58,<br>151.60750000000002, 151.63500000000002, 151.66250000000002,<br>151.69000000000003, 151.71750000000003, 151.745,<br>151.77250000000004, 151.8, 151.82750000000001, 151.85500000000002,<br>151.88250000000002, 151.91000000000003, 151.93750000000003,<br>151.96500000000003, 151.9925, 152.02, 152.0475, 152.07500000000002,<br>152.10250000000002, 152.13000000000002, 152.15750000000003,<br>152.185, 152.21250000000003, 152.24, 152.2675, 152.29500000000002,<br>152.32250000000002, 152.35000000000002, 152.37750000000003,<br>152.40500000000003, 152.4325, 152.46000000000004, 152.4875,<br>152.51500000000001, 152.54250000000002, 152.57000000000002,<br>152.59750000000003, 152.62500000000003, 152.65250000000003, 152.68,<br>152.7075, 152.735, 152.76250000000002, 152.79000000000002,<br>152.81750000000002, 152.84500000000003, 152.8725,<br>152.90000000000003, 152.9275, 152.955, 152.98250000000002,<br>153.01000000000002, 153.03750000000002, 153.06500000000003,<br>153.09250000000003, 153.12, 153.14750000000004, 153.175,<br>153.20250000000001, 153.23000000000002, 153.25750000000002,<br>153.28500000000003, 153.31250000000003, 153.34000000000003, |

| Description | Value                                                                                                                                                                                                                                                                                                                                                                                                                                                                                                                                                                                                                                                                                                                                                                                                                                                                                                                                                                                                                                                                                                                                                                                                                                                                                                                                                                                                                                                                                                                                                                                                                                                                                                                                                                                                                                                                                                                                                                                                                                                                                                                                                                                                                                                                                                                                                                                                                                                                                                                                                                                                                                                                                                                                                                                                                                                                                                                                                                                                                                                                                                                                                                        |
|-------------|------------------------------------------------------------------------------------------------------------------------------------------------------------------------------------------------------------------------------------------------------------------------------------------------------------------------------------------------------------------------------------------------------------------------------------------------------------------------------------------------------------------------------------------------------------------------------------------------------------------------------------------------------------------------------------------------------------------------------------------------------------------------------------------------------------------------------------------------------------------------------------------------------------------------------------------------------------------------------------------------------------------------------------------------------------------------------------------------------------------------------------------------------------------------------------------------------------------------------------------------------------------------------------------------------------------------------------------------------------------------------------------------------------------------------------------------------------------------------------------------------------------------------------------------------------------------------------------------------------------------------------------------------------------------------------------------------------------------------------------------------------------------------------------------------------------------------------------------------------------------------------------------------------------------------------------------------------------------------------------------------------------------------------------------------------------------------------------------------------------------------------------------------------------------------------------------------------------------------------------------------------------------------------------------------------------------------------------------------------------------------------------------------------------------------------------------------------------------------------------------------------------------------------------------------------------------------------------------------------------------------------------------------------------------------------------------------------------------------------------------------------------------------------------------------------------------------------------------------------------------------------------------------------------------------------------------------------------------------------------------------------------------------------------------------------------------------------------------------------------------------------------------------------------------------|
|             | 153.3675, 153.395, 153.4225, 153.45000000000002, 153.47750000000002,<br>153.50500000000002, 153.53250000000003, 153.56, 153.58750000000003,<br>153.615, 153.6425, 153.67000000000002, 153.69750000000002,<br>153.72500000000002, 153.75250000000003, 153.78000000000003,<br>153.8075, 153.83500000000004, 153.8625, 153.89000000000001,<br>153.91750000000002, 153.94500000000002, 153.97250000000003,<br>154.00000000000003, 154.02750000000003, 154.055, 154.0825, 154.11,<br>154.13750000000002, 154.16500000000002, 154.19250000000002,<br>154.22000000000003, 154.2475, 154.27500000000003, 154.3025, 154.33,<br>154.35750000000002, 154.38500000000002, 154.41250000000002,<br>154.44000000000003, 154.46750000000003, 154.495,<br>154.52250000000004, 154.55, 154.57750000000001, 154.60500000000002,<br>154.63250000000002, 154.66000000000003, 154.68750000000003,<br>154.71500000000003, 154.7425, 154.77, 154.7975, 154.82500000000002,<br>154.85250000000002, 154.88000000000002, 154.90750000000003,<br>154.93500000000003, 154.96250000000003, 154.99, 155.0175,<br>155.04500000000002, 155.07250000000002, 155.10000000000002,<br>155.12750000000003, 155.15500000000003, 155.1825,<br>155.21000000000004, 155.2375, 155.26500000000001,<br>155.29250000000002, 155.32000000000002, 155.34750000000003,<br>155.37500000000003, 155.40250000000003, 155.43, 155.4575, 155.485,<br>155.51250000000002, 155.54000000000002, 155.56750000000002,<br>155.59500000000003, 155.62250000000003, 155.65000000000003,<br>155.6775, 155.705, 155.73250000000002, 155.76000000000002,<br>155.78750000000002, 155.81500000000003, 155.84250000000003, 155.87,<br>155.89750000000004, 155.925, 155.95250000000001,<br>155.98000000000002, 156.00750000000002, 156.03500000000003,<br>156.06250000000003, 156.09000000000003, 156.1175, 156.145, 156.1725,<br>156.20000000000002, 156.22750000000002, 156.25500000000002,<br>156.28250000000003, 156.31000000000003, 156.33750000000003,<br>156.365, 156.3925, 156.42000000000002, 156.44750000000002,<br>156.47500000000002, 156.50250000000003, 156.53000000000003,<br>156.5575, 156.58500000000004, 156.6125, 156.64000000000001,<br>156.66750000000002, 156.69500000000002, 156.72250000000003,<br>156.75000000000003, 156.77750000000003, 156.805, 156.8325, 156.86,<br>156.88750000000002, 156.91500000000002, 156.94250000000002,<br>156.97000000000003, 156.99750000000003, 157.02500000000003,<br>157.0525, 157.08, 157.10750000000002, 157.13500000000002,<br>157.16250000000002, 157.19000000000003, 157.21750000000003,<br>157.245, 157.27250000000004, 157.3, 157.32750000000001,<br>157.35500000000002, 157.38250000000002, 157.41000000000003,<br>157.43750000000003, 157.46500000000003, 157.4925, 157.52, 157.5475,<br>157.57500000000002, 157.60250000000002, 157.63000000000002,<br>157.65750000000003, 157.68500000000003, 157.71250000000003, 157.74,<br>157.7675, 157.79500000000002, 157.82250000000002,<br>157.85000000000002, 157.87750000000003, 157.90500000000003,<br>157.9325, 157.96000000000004, 157.9875, 158.01500000000001,<br>158.04250000000002, 158.07000000000002, 158.09750000000003, |



| Description | Value                                                                                                                                                                                                                                                                                                                                                                                                                                                                                                                                                                                                                                                                                                                                                                                                                                                                                                                                                                                                                                                                                                                                                                                                                                                                                                                                                                                                                                                                                                                                                                                                                                                                                                                                                                                                                                                                                                                                                                                                                                                                                                                                                                                                                                                                                                                                                                                                                                                                                                                                                                                                                                                                                                                                                                                                                                                                                                                                                                                               |
|-------------|-----------------------------------------------------------------------------------------------------------------------------------------------------------------------------------------------------------------------------------------------------------------------------------------------------------------------------------------------------------------------------------------------------------------------------------------------------------------------------------------------------------------------------------------------------------------------------------------------------------------------------------------------------------------------------------------------------------------------------------------------------------------------------------------------------------------------------------------------------------------------------------------------------------------------------------------------------------------------------------------------------------------------------------------------------------------------------------------------------------------------------------------------------------------------------------------------------------------------------------------------------------------------------------------------------------------------------------------------------------------------------------------------------------------------------------------------------------------------------------------------------------------------------------------------------------------------------------------------------------------------------------------------------------------------------------------------------------------------------------------------------------------------------------------------------------------------------------------------------------------------------------------------------------------------------------------------------------------------------------------------------------------------------------------------------------------------------------------------------------------------------------------------------------------------------------------------------------------------------------------------------------------------------------------------------------------------------------------------------------------------------------------------------------------------------------------------------------------------------------------------------------------------------------------------------------------------------------------------------------------------------------------------------------------------------------------------------------------------------------------------------------------------------------------------------------------------------------------------------------------------------------------------------------------------------------------------------------------------------------------------------|
|             | 158.1250000000003, 158.1525000000003, 158.18, 158.2075, 158.235,<br>158.2625000000002, 158.2900000000002, 158.3175000000002,<br>158.3450000000003, 158.3725000000003, 158.4000000000003,<br>158.4275, 158.455, 158.4825000000002, 158.5100000000002,<br>158.5375000000002, 158.5650000000003, 158.5925000000003, 158.62,<br>158.6475000000004, 158.675, 158.7025000000001,<br>158.7300000000002, 158.7575000000002, 158.7850000000003,<br>158.8125000000003, 158.8400000000003, 158.8675, 158.895, 158.9225,<br>158.9500000000002, 158.9775000000002, 159.0050000000002,<br>159.0325000000003, 159.0600000000003, 159.0875000000003,<br>159.115, 159.1425, 159.1700000000002, 159.1975000000002,<br>159.2250000000002, 159.2525000000003, 159.2800000000003,<br>159.3075, 159.3350000000004, 159.3625, 159.3900000000001,<br>159.4175000000002, 159.4450000000002, 159.4725000000003,<br>159.5000000000003, 159.5275000000003, 159.555, 159.5825, 159.61,<br>159.6375000000002, 159.6650000000002, 159.6925000000002,<br>159.7200000000003, 159.7475000000003, 159.7750000000003,<br>159.8025, 159.83, 159.8575000000002, 159.8850000000002,<br>159.9125000000002, 159.9400000000003, 159.9675000000003,<br>159.995, 160.0225000000004, 160.05, 160.0775000000001,<br>160.1050000000002, 160.1325000000002, 160.1600000000003,<br>160.1875000000003, 160.2150000000003, 160.2425, 160.27, 160.2975,<br>160.3250000000002, 160.3525000000002, 160.3800000000002,<br>160.4075000000003, 160.4350000000003, 160.4625000000003, 160.49,<br>160.5175, 160.5450000000002, 160.5725000000002,<br>160.6000000000002, 160.6275000000003, 160.6550000000003,<br>160.6825, 160.7100000000004, 160.7375, 160.7650000000001,<br>160.7925000000002, 160.8200000000002, 160.8475000000003,<br>160.8750000000003, 160.9025000000003, 160.93, 160.9575000000004,<br>160.985, 161.0125000000002, 161.0400000000002,<br>161.0675000000002, 161.0950000000003, 161.1225000000003,<br>161.1500000000003, 161.1775, 161.205, 161.2325000000002,<br>161.2600000000002, 161.2875000000002, 161.3150000000003,<br>161.3425000000003, 161.37, 161.3975000000004, 161.425,<br>161.4525000000001, 161.4800000000002, 161.5075000000002,<br>161.5350000000003, 161.5625000000003, 161.5900000000003,<br>161.6175, 161.6450000000004, 161.6725, 161.7000000000002,<br>161.7275000000002, 161.7550000000002, 161.7825000000003,<br>161.8100000000003, 161.8375000000003, 161.865, 161.8925,<br>161.9200000000002, 161.9475000000002, 161.9750000000002,<br>162.0025000000003, 162.0300000000003, 162.0575,<br>162.0850000000004, 162.1125, 162.1400000000001,<br>162.1675000000002, 162.1950000000002, 162.2225000000003,<br>162.2500000000003, 162.2775000000003, 162.305,<br>162.3325000000004, 162.36, 162.3875000000002, 162.4150000000002,<br>162.4425000000002, 162.4700000000003, 162.4975000000003,<br>162.5250000000003, 162.5525, 162.58, 162.6075000000002,<br>162.6350000000002, 162.6625000000002, 162.6900000000003, |

| Description        | Value                                                                                                                                                                                                                                                                                                                                                                                                                                                                                                                                                                                                                                                                                                                                                                                                                                                                                                                                                                                                                                                                                                                                                                                                                                                                                                                                                                                                                                                                                                                     |
|--------------------|---------------------------------------------------------------------------------------------------------------------------------------------------------------------------------------------------------------------------------------------------------------------------------------------------------------------------------------------------------------------------------------------------------------------------------------------------------------------------------------------------------------------------------------------------------------------------------------------------------------------------------------------------------------------------------------------------------------------------------------------------------------------------------------------------------------------------------------------------------------------------------------------------------------------------------------------------------------------------------------------------------------------------------------------------------------------------------------------------------------------------------------------------------------------------------------------------------------------------------------------------------------------------------------------------------------------------------------------------------------------------------------------------------------------------------------------------------------------------------------------------------------------------|
|                    | 162.71750000000003, 162.745, 162.77250000000004, 162.8, 162.82750000000001, 162.85500000000002, 162.88250000000002, 162.91000000000003, 162.93750000000003, 162.96500000000003, 162.9925, 163.02000000000004, 163.0475, 163.07500000000002, 163.10250000000002, 163.13000000000002, 163.15750000000003, 163.18500000000003, 163.21250000000003, 163.24, 163.2675, 163.29500000000002, 163.32250000000002, 163.35000000000002, 163.37750000000003, 163.40500000000003, 163.4325, 163.46000000000004, 163.4875, 163.51500000000001, 163.54250000000002, 163.57000000000002, 163.59750000000003, 163.62500000000003, 163.65250000000003, 163.68, 163.70750000000004, 163.735, 163.76250000000002, 163.79000000000002, 163.81750000000002, 163.84500000000003, 163.87250000000003, 163.90000000000003, 163.9275, 163.955, 163.98250000000002, 164.01000000000002, 164.03750000000002, 164.06500000000003, 164.09250000000003, 164.12, 164.14750000000004, 164.175, 164.20250000000001, 164.23000000000002, 164.25750000000002, 164.28500000000003, 164.31250000000003, 164.34000000000003, 164.3675, 164.39500000000004, 164.4225, 164.45000000000002, 164.47750000000002, 164.50500000000002, 164.53250000000003, 164.56000000000003, 164.58750000000003, 164.615, 164.6425, 164.67000000000002, 164.69750000000002, 164.72500000000002, 164.75250000000003, 164.78000000000003, 164.8075, 164.83500000000004, 164.8625, 164.89000000000001, 164.91750000000002, 164.94500000000002, 164.97250000000003, 165.00000000000003} |
| Relative tolerance | 0.005                                                                                                                                                                                                                                                                                                                                                                                                                                                                                                                                                                                                                                                                                                                                                                                                                                                                                                                                                                                                                                                                                                                                                                                                                                                                                                                                                                                                                                                                                                                     |

#### TIME STEPPING

| Description          | Value |
|----------------------|-------|
| Maximum BDF order    | 2     |
| Nonlinear controller | On    |

#### LOG

|     |        |          |     |     |     |   |    |   |         |         |
|-----|--------|----------|-----|-----|-----|---|----|---|---------|---------|
| -   | 151.22 | - out    |     |     |     |   |    |   |         |         |
| -   | 151.25 | - out    |     |     |     |   |    |   |         |         |
| -   | 151.28 | - out    |     |     |     |   |    |   |         |         |
| -   | 151.31 | - out    |     |     |     |   |    |   |         |         |
| -   | 151.33 | - out    |     |     |     |   |    |   |         |         |
| 438 | 151.35 | 0.27192  | 336 | 169 | 336 | 2 | 15 | 0 | 8.2e-13 | 4.1e-15 |
| -   | 151.36 | - out    |     |     |     |   |    |   |         |         |
| -   | 151.39 | - out    |     |     |     |   |    |   |         |         |
| -   | 151.42 | - out    |     |     |     |   |    |   |         |         |
| -   | 151.44 | - out    |     |     |     |   |    |   |         |         |
| -   | 151.47 | - out    |     |     |     |   |    |   |         |         |
| -   | 151.5  | - out    |     |     |     |   |    |   |         |         |
| -   | 151.53 | - out    |     |     |     |   |    |   |         |         |
| -   | 151.55 | - out    |     |     |     |   |    |   |         |         |
| -   | 151.58 | - out    |     |     |     |   |    |   |         |         |
| -   | 151.61 | - out    |     |     |     |   |    |   |         |         |
| 439 | 151.62 | 0.27192  | 338 | 170 | 338 | 2 | 15 | 0 | 1.4e-14 | 1.3e-14 |
| -   | 151.64 | - out    |     |     |     |   |    |   |         |         |
| -   | 151.66 | - out    |     |     |     |   |    |   |         |         |
| -   | 151.69 | - out    |     |     |     |   |    |   |         |         |
| -   | 151.72 | - out    |     |     |     |   |    |   |         |         |
| -   | 151.75 | - out    |     |     |     |   |    |   |         |         |
| -   | 151.77 | - out    |     |     |     |   |    |   |         |         |
| -   | 151.8  | - out    |     |     |     |   |    |   |         |         |
| -   | 151.83 | - out    |     |     |     |   |    |   |         |         |
| -   | 151.86 | - out    |     |     |     |   |    |   |         |         |
| 440 | 151.86 | 0.23188  | 342 | 172 | 342 | 2 | 16 | 0 | 1.7e-12 | 4.9e-15 |
| -   | 151.88 | - out    |     |     |     |   |    |   |         |         |
| -   | 151.91 | - out    |     |     |     |   |    |   |         |         |
| -   | 151.94 | - out    |     |     |     |   |    |   |         |         |
| -   | 151.97 | - out    |     |     |     |   |    |   |         |         |
| -   | 151.99 | - out    |     |     |     |   |    |   |         |         |
| -   | 152.02 | - out    |     |     |     |   |    |   |         |         |
| -   | 152.05 | - out    |     |     |     |   |    |   |         |         |
| -   | 152.08 | - out    |     |     |     |   |    |   |         |         |
| 441 | 152.09 | 0.23188  | 344 | 173 | 344 | 2 | 16 | 0 | 1.7e-13 | 3.9e-15 |
| -   | 152.1  | - out    |     |     |     |   |    |   |         |         |
| -   | 152.13 | - out    |     |     |     |   |    |   |         |         |
| -   | 152.16 | - out    |     |     |     |   |    |   |         |         |
| -   | 152.19 | - out    |     |     |     |   |    |   |         |         |
| 442 | 152.19 | 0.10221  | 348 | 175 | 348 | 2 | 17 | 0 | 1.4e-12 | 6e-15   |
| -   | 152.21 | - out    |     |     |     |   |    |   |         |         |
| -   | 152.24 | - out    |     |     |     |   |    |   |         |         |
| -   | 152.27 | - out    |     |     |     |   |    |   |         |         |
| 443 | 152.29 | 0.10221  | 350 | 176 | 350 | 2 | 17 | 0 | 1.2e-13 | 5.1e-15 |
| -   | 152.3  | - out    |     |     |     |   |    |   |         |         |
| -   | 152.32 | - out    |     |     |     |   |    |   |         |         |
| -   | 152.35 | - out    |     |     |     |   |    |   |         |         |
| -   | 152.38 | - out    |     |     |     |   |    |   |         |         |
| 444 | 152.38 | 0.087549 | 352 | 177 | 352 | 2 | 17 | 0 | 3e-13   | 4.3e-15 |
| -   | 152.41 | - out    |     |     |     |   |    |   |         |         |
| -   | 152.43 | - out    |     |     |     |   |    |   |         |         |
| 445 | 152.45 | 0.071948 | 354 | 178 | 354 | 2 | 17 | 0 | 9.1e-14 | 3.6e-15 |
| -   | 152.46 | - out    |     |     |     |   |    |   |         |         |
| -   | 152.49 | - out    |     |     |     |   |    |   |         |         |
| -   | 152.52 | - out    |     |     |     |   |    |   |         |         |

|     |        |          |     |     |     |   |    |   |         |         |
|-----|--------|----------|-----|-----|-----|---|----|---|---------|---------|
| 446 | 152.52 | 0.064753 | 356 | 179 | 356 | 2 | 17 | 0 | 1.9e-14 | 3.8e-15 |
| -   | 152.54 | - out    |     |     |     |   |    |   |         |         |
| -   | 152.57 | - out    |     |     |     |   |    |   |         |         |
| 447 | 152.58 | 0.064753 | 358 | 180 | 358 | 2 | 17 | 0 | 1.5e-14 | 4.1e-15 |
| -   | 152.6  | - out    |     |     |     |   |    |   |         |         |
| -   | 152.63 | - out    |     |     |     |   |    |   |         |         |
| 448 | 152.65 | 0.064753 | 360 | 181 | 360 | 2 | 17 | 0 | 1e-13   | 4.5e-15 |
| -   | 152.65 | - out    |     |     |     |   |    |   |         |         |
| -   | 152.68 | - out    |     |     |     |   |    |   |         |         |
| -   | 152.71 | - out    |     |     |     |   |    |   |         |         |
| 449 | 152.71 | 0.064753 | 362 | 182 | 362 | 2 | 17 | 0 | 3.7e-14 | 5.4e-15 |
| -   | 152.74 | - out    |     |     |     |   |    |   |         |         |
| -   | 152.76 | - out    |     |     |     |   |    |   |         |         |
| 450 | 152.78 | 0.064753 | 364 | 183 | 364 | 2 | 17 | 0 | 4.8e-14 | 5.5e-15 |
| -   | 152.79 | - out    |     |     |     |   |    |   |         |         |
| -   | 152.82 | - out    |     |     |     |   |    |   |         |         |
| 451 | 152.84 | 0.064753 | 366 | 184 | 366 | 2 | 17 | 0 | 1.7e-14 | 5e-15   |
| -   | 152.85 | - out    |     |     |     |   |    |   |         |         |
| -   | 152.87 | - out    |     |     |     |   |    |   |         |         |
| -   | 152.9  | - out    |     |     |     |   |    |   |         |         |
| 452 | 152.91 | 0.064753 | 368 | 185 | 368 | 2 | 17 | 0 | 1.1e-14 | 5.2e-15 |
| -   | 152.93 | - out    |     |     |     |   |    |   |         |         |
| -   | 152.96 | - out    |     |     |     |   |    |   |         |         |
| 453 | 152.97 | 0.064753 | 370 | 186 | 370 | 2 | 17 | 0 | 5.8e-14 | 5e-15   |
| -   | 152.98 | - out    |     |     |     |   |    |   |         |         |
| -   | 153.01 | - out    |     |     |     |   |    |   |         |         |
| 454 | 153.03 | 0.064753 | 372 | 187 | 372 | 2 | 17 | 0 | 1.1e-13 | 4.9e-15 |
| -   | 153.04 | - out    |     |     |     |   |    |   |         |         |
| -   | 153.07 | - out    |     |     |     |   |    |   |         |         |
| -   | 153.09 | - out    |     |     |     |   |    |   |         |         |
| 455 | 153.1  | 0.064753 | 374 | 188 | 374 | 2 | 17 | 0 | 2.4e-13 | 6e-15   |
| -   | 153.12 | - out    |     |     |     |   |    |   |         |         |
| -   | 153.15 | - out    |     |     |     |   |    |   |         |         |
| 456 | 153.16 | 0.064753 | 376 | 189 | 376 | 2 | 17 | 0 | 1.3e-13 | 3.8e-15 |
| -   | 153.18 | - out    |     |     |     |   |    |   |         |         |
| -   | 153.2  | - out    |     |     |     |   |    |   |         |         |
| 457 | 153.23 | 0.064753 | 378 | 190 | 378 | 2 | 17 | 0 | 2.9e-13 | 4.3e-15 |
| -   | 153.23 | - out    |     |     |     |   |    |   |         |         |
| -   | 153.26 | - out    |     |     |     |   |    |   |         |         |
| -   | 153.29 | - out    |     |     |     |   |    |   |         |         |
| 458 | 153.29 | 0.064753 | 380 | 191 | 380 | 2 | 17 | 0 | 2.5e-13 | 4.1e-15 |
| -   | 153.31 | - out    |     |     |     |   |    |   |         |         |
| -   | 153.34 | - out    |     |     |     |   |    |   |         |         |
| 459 | 153.36 | 0.064753 | 382 | 192 | 382 | 2 | 17 | 0 | 1.1e-12 | 5.3e-15 |
| -   | 153.37 | - out    |     |     |     |   |    |   |         |         |
| -   | 153.4  | - out    |     |     |     |   |    |   |         |         |
| -   | 153.42 | - out    |     |     |     |   |    |   |         |         |
| 460 | 153.42 | 0.064753 | 384 | 193 | 384 | 2 | 17 | 0 | 2.8e-13 | 2.8e-15 |
| -   | 153.45 | - out    |     |     |     |   |    |   |         |         |
| -   | 153.48 | - out    |     |     |     |   |    |   |         |         |
| 461 | 153.49 | 0.064753 | 386 | 194 | 386 | 2 | 17 | 0 | 7.7e-13 | 5.6e-15 |
| -   | 153.51 | - out    |     |     |     |   |    |   |         |         |
| -   | 153.53 | - out    |     |     |     |   |    |   |         |         |
| 462 | 153.55 | 0.064753 | 388 | 195 | 388 | 2 | 17 | 0 | 1e-12   | 4e-15   |
| -   | 153.56 | - out    |     |     |     |   |    |   |         |         |
| -   | 153.59 | - out    |     |     |     |   |    |   |         |         |

|     |        |          |     |     |     |   |    |   |         |         |  |
|-----|--------|----------|-----|-----|-----|---|----|---|---------|---------|--|
| -   | 153.62 | - out    |     |     |     |   |    |   |         |         |  |
| -   | 153.64 | - out    |     |     |     |   |    |   |         |         |  |
| -   | 153.67 | - out    |     |     |     |   |    |   |         |         |  |
| 463 | 153.68 | 0.12951  | 390 | 196 | 390 | 2 | 17 | 0 | 1.6e-12 | 3.5e-15 |  |
| -   | 153.7  | - out    |     |     |     |   |    |   |         |         |  |
| -   | 153.73 | - out    |     |     |     |   |    |   |         |         |  |
| -   | 153.75 | - out    |     |     |     |   |    |   |         |         |  |
| -   | 153.78 | - out    |     |     |     |   |    |   |         |         |  |
| -   | 153.81 | - out    |     |     |     |   |    |   |         |         |  |
| 464 | 153.81 | 0.12951  | 392 | 197 | 392 | 2 | 17 | 0 | 1e-12   | 4.1e-15 |  |
| -   | 153.84 | - out    |     |     |     |   |    |   |         |         |  |
| -   | 153.86 | - out    |     |     |     |   |    |   |         |         |  |
| -   | 153.89 | - out    |     |     |     |   |    |   |         |         |  |
| -   | 153.92 | - out    |     |     |     |   |    |   |         |         |  |
| 465 | 153.94 | 0.12951  | 394 | 198 | 394 | 2 | 17 | 0 | 1.8e-12 | 3.3e-15 |  |
| -   | 153.95 | - out    |     |     |     |   |    |   |         |         |  |
| -   | 153.97 | - out    |     |     |     |   |    |   |         |         |  |
| -   | 154    | - out    |     |     |     |   |    |   |         |         |  |
| -   | 154.03 | - out    |     |     |     |   |    |   |         |         |  |
| -   | 154.06 | - out    |     |     |     |   |    |   |         |         |  |
| 466 | 154.07 | 0.12951  | 396 | 199 | 396 | 2 | 17 | 0 | 7.2e-13 | 5.5e-15 |  |
| -   | 154.08 | - out    |     |     |     |   |    |   |         |         |  |
| -   | 154.11 | - out    |     |     |     |   |    |   |         |         |  |
| -   | 154.14 | - out    |     |     |     |   |    |   |         |         |  |
| -   | 154.17 | - out    |     |     |     |   |    |   |         |         |  |
| -   | 154.19 | - out    |     |     |     |   |    |   |         |         |  |
| -   | 154.22 | - out    |     |     |     |   |    |   |         |         |  |
| -   | 154.25 | - out    |     |     |     |   |    |   |         |         |  |
| -   | 154.28 | - out    |     |     |     |   |    |   |         |         |  |
| -   | 154.3  | - out    |     |     |     |   |    |   |         |         |  |
| 467 | 154.33 | 0.25901  | 398 | 200 | 398 | 2 | 17 | 0 | 9.1e-14 | 5e-15   |  |
| -   | 154.33 | - out    |     |     |     |   |    |   |         |         |  |
| -   | 154.36 | - out    |     |     |     |   |    |   |         |         |  |
| -   | 154.39 | - out    |     |     |     |   |    |   |         |         |  |
| -   | 154.41 | - out    |     |     |     |   |    |   |         |         |  |
| -   | 154.44 | - out    |     |     |     |   |    |   |         |         |  |
| -   | 154.47 | - out    |     |     |     |   |    |   |         |         |  |
| -   | 154.5  | - out    |     |     |     |   |    |   |         |         |  |
| -   | 154.52 | - out    |     |     |     |   |    |   |         |         |  |
| -   | 154.55 | - out    |     |     |     |   |    |   |         |         |  |
| -   | 154.58 | - out    |     |     |     |   |    |   |         |         |  |
| 468 | 154.59 | 0.25901  | 400 | 201 | 400 | 2 | 17 | 0 | 3.4e-13 | 3.4e-15 |  |
| -   | 154.61 | - out    |     |     |     |   |    |   |         |         |  |
| -   | 154.63 | - out    |     |     |     |   |    |   |         |         |  |
| -   | 154.66 | - out    |     |     |     |   |    |   |         |         |  |
| -   | 154.69 | - out    |     |     |     |   |    |   |         |         |  |
| 469 | 154.71 | 0.11674  | 404 | 203 | 404 | 2 | 18 | 0 | 3.3e-13 | 3.9e-15 |  |
| -   | 154.72 | - out    |     |     |     |   |    |   |         |         |  |
| -   | 154.74 | - out    |     |     |     |   |    |   |         |         |  |
| -   | 154.77 | - out    |     |     |     |   |    |   |         |         |  |
| -   | 154.8  | - out    |     |     |     |   |    |   |         |         |  |
| 470 | 154.82 | 0.11674  | 406 | 204 | 406 | 2 | 18 | 0 | 1.1e-13 | 3.1e-15 |  |
| -   | 154.83 | - out    |     |     |     |   |    |   |         |         |  |
| -   | 154.85 | - out    |     |     |     |   |    |   |         |         |  |
| -   | 154.88 | - out    |     |     |     |   |    |   |         |         |  |
| 471 | 154.89 | 0.070483 | 410 | 206 | 410 | 2 | 19 | 0 | 2.5e-14 | 4.1e-15 |  |

|     |        |          |     |     |     |     |   |    |   |         |         |
|-----|--------|----------|-----|-----|-----|-----|---|----|---|---------|---------|
| -   | 154.91 | -        | out |     |     |     |   |    |   |         |         |
| -   | 154.94 | -        | out |     |     |     |   |    |   |         |         |
| -   | 154.96 | -        | out |     |     |     |   |    |   |         |         |
| 472 | 154.96 | 0.070483 |     | 412 | 207 | 412 | 2 | 19 | 0 | 1.1e-13 | 3.6e-15 |
| -   | 154.99 | -        | out |     |     |     |   |    |   |         |         |
| -   | 155.02 | -        | out |     |     |     |   |    |   |         |         |
| 473 | 155.03 | 0.070483 |     | 414 | 208 | 414 | 2 | 19 | 0 | 7.6e-14 | 5.4e-15 |
| -   | 155.05 | -        | out |     |     |     |   |    |   |         |         |
| -   | 155.07 | -        | out |     |     |     |   |    |   |         |         |
| -   | 155.1  | -        | out |     |     |     |   |    |   |         |         |
| 474 | 155.1  | 0.070483 |     | 416 | 209 | 416 | 2 | 19 | 0 | 3.3e-14 | 4.7e-15 |
| -   | 155.13 | -        | out |     |     |     |   |    |   |         |         |
| -   | 155.16 | -        | out |     |     |     |   |    |   |         |         |
| 475 | 155.17 | 0.070483 |     | 418 | 210 | 418 | 2 | 19 | 0 | 1.1e-13 | 4.6e-15 |
| -   | 155.18 | -        | out |     |     |     |   |    |   |         |         |
| -   | 155.21 | -        | out |     |     |     |   |    |   |         |         |
| -   | 155.24 | -        | out |     |     |     |   |    |   |         |         |
| 476 | 155.24 | 0.070483 |     | 420 | 211 | 420 | 2 | 19 | 0 | 4.2e-14 | 5.6e-15 |
| -   | 155.27 | -        | out |     |     |     |   |    |   |         |         |
| -   | 155.29 | -        | out |     |     |     |   |    |   |         |         |
| 477 | 155.32 | 0.070483 |     | 422 | 212 | 422 | 2 | 19 | 0 | 1.8e-14 | 4.4e-15 |
| -   | 155.32 | -        | out |     |     |     |   |    |   |         |         |
| -   | 155.35 | -        | out |     |     |     |   |    |   |         |         |
| -   | 155.38 | -        | out |     |     |     |   |    |   |         |         |
| 478 | 155.39 | 0.070483 |     | 424 | 213 | 424 | 2 | 19 | 0 | 7e-14   | 4.6e-15 |
| -   | 155.4  | -        | out |     |     |     |   |    |   |         |         |
| -   | 155.43 | -        | out |     |     |     |   |    |   |         |         |
| 479 | 155.45 | 0.063435 |     | 426 | 214 | 426 | 2 | 19 | 0 | 1e-13   | 4.2e-15 |
| -   | 155.46 | -        | out |     |     |     |   |    |   |         |         |
| -   | 155.49 | -        | out |     |     |     |   |    |   |         |         |
| -   | 155.51 | -        | out |     |     |     |   |    |   |         |         |
| 480 | 155.51 | 0.063435 |     | 428 | 215 | 428 | 2 | 19 | 0 | 1.2e-13 | 4.6e-15 |
| -   | 155.54 | -        | out |     |     |     |   |    |   |         |         |
| -   | 155.57 | -        | out |     |     |     |   |    |   |         |         |
| 481 | 155.58 | 0.063435 |     | 430 | 216 | 430 | 2 | 19 | 0 | 1e-13   | 4.9e-15 |
| -   | 155.6  | -        | out |     |     |     |   |    |   |         |         |
| -   | 155.62 | -        | out |     |     |     |   |    |   |         |         |
| 482 | 155.64 | 0.063435 |     | 432 | 217 | 432 | 2 | 19 | 0 | 7.6e-14 | 2.9e-15 |
| -   | 155.65 | -        | out |     |     |     |   |    |   |         |         |
| -   | 155.68 | -        | out |     |     |     |   |    |   |         |         |
| 483 | 155.7  | 0.063435 |     | 434 | 218 | 434 | 2 | 19 | 0 | 3.8e-13 | 3.9e-15 |
| -   | 155.71 | -        | out |     |     |     |   |    |   |         |         |
| -   | 155.73 | -        | out |     |     |     |   |    |   |         |         |
| -   | 155.76 | -        | out |     |     |     |   |    |   |         |         |
| 484 | 155.77 | 0.063435 |     | 436 | 219 | 436 | 2 | 19 | 0 | 6.1e-13 | 4e-15   |
| -   | 155.79 | -        | out |     |     |     |   |    |   |         |         |
| -   | 155.82 | -        | out |     |     |     |   |    |   |         |         |
| 485 | 155.83 | 0.063435 |     | 438 | 220 | 438 | 2 | 19 | 0 | 2e-13   | 5e-15   |
| -   | 155.84 | -        | out |     |     |     |   |    |   |         |         |
| -   | 155.87 | -        | out |     |     |     |   |    |   |         |         |
| 486 | 155.89 | 0.063435 |     | 440 | 221 | 440 | 2 | 19 | 0 | 2.9e-13 | 5.2e-15 |
| -   | 155.9  | -        | out |     |     |     |   |    |   |         |         |
| -   | 155.93 | -        | out |     |     |     |   |    |   |         |         |
| -   | 155.95 | -        | out |     |     |     |   |    |   |         |         |
| 487 | 155.96 | 0.063435 |     | 442 | 222 | 442 | 2 | 19 | 0 | 5.6e-14 | 3.7e-15 |
| -   | 155.98 | -        | out |     |     |     |   |    |   |         |         |

|     |        |          |     |     |     |   |    |   |         |         |  |
|-----|--------|----------|-----|-----|-----|---|----|---|---------|---------|--|
| -   | 156.01 | - out    |     |     |     |   |    |   |         |         |  |
| 488 | 156.02 | 0.063435 | 444 | 223 | 444 | 2 | 19 | 0 | 7.4e-13 | 4e-15   |  |
| -   | 156.04 | - out    |     |     |     |   |    |   |         |         |  |
| -   | 156.06 | - out    |     |     |     |   |    |   |         |         |  |
| 489 | 156.08 | 0.063435 | 446 | 224 | 446 | 2 | 19 | 0 | 3.2e-13 | 4.1e-15 |  |
| -   | 156.09 | - out    |     |     |     |   |    |   |         |         |  |
| -   | 156.12 | - out    |     |     |     |   |    |   |         |         |  |
| -   | 156.15 | - out    |     |     |     |   |    |   |         |         |  |
| 490 | 156.15 | 0.063435 | 448 | 225 | 448 | 2 | 19 | 0 | 3.8e-13 | 7.2e-15 |  |
| -   | 156.17 | - out    |     |     |     |   |    |   |         |         |  |
| -   | 156.2  | - out    |     |     |     |   |    |   |         |         |  |
| -   | 156.23 | - out    |     |     |     |   |    |   |         |         |  |
| -   | 156.26 | - out    |     |     |     |   |    |   |         |         |  |
| 491 | 156.27 | 0.12687  | 450 | 226 | 450 | 2 | 19 | 0 | 6.8e-13 | 7.6e-15 |  |
| -   | 156.28 | - out    |     |     |     |   |    |   |         |         |  |
| -   | 156.31 | - out    |     |     |     |   |    |   |         |         |  |
| -   | 156.34 | - out    |     |     |     |   |    |   |         |         |  |
| -   | 156.37 | - out    |     |     |     |   |    |   |         |         |  |
| -   | 156.39 | - out    |     |     |     |   |    |   |         |         |  |
| 492 | 156.4  | 0.12687  | 452 | 227 | 452 | 2 | 19 | 0 | 6.7e-13 | 6.4e-15 |  |
| -   | 156.42 | - out    |     |     |     |   |    |   |         |         |  |
| -   | 156.45 | - out    |     |     |     |   |    |   |         |         |  |
| -   | 156.48 | - out    |     |     |     |   |    |   |         |         |  |
| -   | 156.5  | - out    |     |     |     |   |    |   |         |         |  |
| 493 | 156.53 | 0.12687  | 454 | 228 | 454 | 2 | 19 | 0 | 5.2e-13 | 5.2e-15 |  |
| -   | 156.53 | - out    |     |     |     |   |    |   |         |         |  |
| -   | 156.56 | - out    |     |     |     |   |    |   |         |         |  |
| -   | 156.59 | - out    |     |     |     |   |    |   |         |         |  |
| -   | 156.61 | - out    |     |     |     |   |    |   |         |         |  |
| -   | 156.64 | - out    |     |     |     |   |    |   |         |         |  |
| -   | 156.67 | - out    |     |     |     |   |    |   |         |         |  |
| -   | 156.7  | - out    |     |     |     |   |    |   |         |         |  |
| -   | 156.72 | - out    |     |     |     |   |    |   |         |         |  |
| -   | 156.75 | - out    |     |     |     |   |    |   |         |         |  |
| -   | 156.78 | - out    |     |     |     |   |    |   |         |         |  |
| 494 | 156.78 | 0.25374  | 456 | 229 | 456 | 2 | 19 | 0 | 1.2e-12 | 3.9e-15 |  |
| -   | 156.81 | - out    |     |     |     |   |    |   |         |         |  |
| -   | 156.83 | - out    |     |     |     |   |    |   |         |         |  |
| -   | 156.86 | - out    |     |     |     |   |    |   |         |         |  |
| -   | 156.89 | - out    |     |     |     |   |    |   |         |         |  |
| -   | 156.92 | - out    |     |     |     |   |    |   |         |         |  |
| -   | 156.94 | - out    |     |     |     |   |    |   |         |         |  |
| -   | 156.97 | - out    |     |     |     |   |    |   |         |         |  |
| -   | 157    | - out    |     |     |     |   |    |   |         |         |  |
| -   | 157.03 | - out    |     |     |     |   |    |   |         |         |  |
| 495 | 157.04 | 0.25374  | 458 | 230 | 458 | 2 | 19 | 0 | 1e-13   | 6.1e-15 |  |
| -   | 157.05 | - out    |     |     |     |   |    |   |         |         |  |
| -   | 157.08 | - out    |     |     |     |   |    |   |         |         |  |
| -   | 157.11 | - out    |     |     |     |   |    |   |         |         |  |
| -   | 157.14 | - out    |     |     |     |   |    |   |         |         |  |
| -   | 157.16 | - out    |     |     |     |   |    |   |         |         |  |
| -   | 157.19 | - out    |     |     |     |   |    |   |         |         |  |
| -   | 157.22 | - out    |     |     |     |   |    |   |         |         |  |
| -   | 157.25 | - out    |     |     |     |   |    |   |         |         |  |
| -   | 157.27 | - out    |     |     |     |   |    |   |         |         |  |
| -   | 157.3  | - out    |     |     |     |   |    |   |         |         |  |

|     |        |          |     |     |     |   |    |   |         |         |  |
|-----|--------|----------|-----|-----|-----|---|----|---|---------|---------|--|
| -   | 157.33 | - out    |     |     |     |   |    |   |         |         |  |
| 496 | 157.33 | 0.29504  | 462 | 232 | 462 | 2 | 20 | 0 | 7e-13   | 3.8e-15 |  |
| -   | 157.36 | - out    |     |     |     |   |    |   |         |         |  |
| -   | 157.38 | - out    |     |     |     |   |    |   |         |         |  |
| -   | 157.41 | - out    |     |     |     |   |    |   |         |         |  |
| -   | 157.44 | - out    |     |     |     |   |    |   |         |         |  |
| -   | 157.47 | - out    |     |     |     |   |    |   |         |         |  |
| -   | 157.49 | - out    |     |     |     |   |    |   |         |         |  |
| 497 | 157.51 | 0.17678  | 466 | 234 | 466 | 2 | 21 | 0 | 4.8e-13 | 4.3e-15 |  |
| -   | 157.52 | - out    |     |     |     |   |    |   |         |         |  |
| -   | 157.55 | - out    |     |     |     |   |    |   |         |         |  |
| -   | 157.58 | - out    |     |     |     |   |    |   |         |         |  |
| -   | 157.6  | - out    |     |     |     |   |    |   |         |         |  |
| 498 | 157.62 | 0.11719  | 470 | 236 | 470 | 2 | 22 | 0 | 9.3e-13 | 5.8e-15 |  |
| -   | 157.63 | - out    |     |     |     |   |    |   |         |         |  |
| -   | 157.66 | - out    |     |     |     |   |    |   |         |         |  |
| -   | 157.69 | - out    |     |     |     |   |    |   |         |         |  |
| -   | 157.71 | - out    |     |     |     |   |    |   |         |         |  |
| -   | 157.74 | - out    |     |     |     |   |    |   |         |         |  |
| 499 | 157.74 | 0.11719  | 472 | 237 | 472 | 2 | 22 | 0 | 3e-13   | 3.6e-15 |  |
| -   | 157.77 | - out    |     |     |     |   |    |   |         |         |  |
| -   | 157.8  | - out    |     |     |     |   |    |   |         |         |  |
| 500 | 157.81 | 0.067981 | 476 | 239 | 476 | 2 | 23 | 0 | 1e-13   | 3.5e-15 |  |
| -   | 157.82 | - out    |     |     |     |   |    |   |         |         |  |
| -   | 157.85 | - out    |     |     |     |   |    |   |         |         |  |
| 501 | 157.88 | 0.067981 | 478 | 240 | 478 | 2 | 23 | 0 | 1.8e-13 | 5.3e-15 |  |
| -   | 157.88 | - out    |     |     |     |   |    |   |         |         |  |
| -   | 157.91 | - out    |     |     |     |   |    |   |         |         |  |
| -   | 157.93 | - out    |     |     |     |   |    |   |         |         |  |
| 502 | 157.94 | 0.061183 | 480 | 241 | 480 | 2 | 23 | 0 | 1.3e-13 | 4.4e-15 |  |
| -   | 157.96 | - out    |     |     |     |   |    |   |         |         |  |
| -   | 157.99 | - out    |     |     |     |   |    |   |         |         |  |
| 503 | 158    | 0.061183 | 482 | 242 | 482 | 2 | 23 | 0 | 1.6e-13 | 5.3e-15 |  |
| -   | 158.02 | - out    |     |     |     |   |    |   |         |         |  |
| -   | 158.04 | - out    |     |     |     |   |    |   |         |         |  |
| 504 | 158.06 | 0.061183 | 484 | 243 | 484 | 2 | 23 | 0 | 3.6e-14 | 4.2e-15 |  |
| -   | 158.07 | - out    |     |     |     |   |    |   |         |         |  |
| -   | 158.1  | - out    |     |     |     |   |    |   |         |         |  |
| 505 | 158.12 | 0.061183 | 486 | 244 | 486 | 2 | 23 | 0 | 5.2e-14 | 3.8e-15 |  |
| -   | 158.13 | - out    |     |     |     |   |    |   |         |         |  |
| -   | 158.15 | - out    |     |     |     |   |    |   |         |         |  |
| -   | 158.18 | - out    |     |     |     |   |    |   |         |         |  |
| 506 | 158.19 | 0.066869 | 490 | 246 | 490 | 2 | 24 | 0 | 4.1e-14 | 7.2e-15 |  |
| -   | 158.21 | - out    |     |     |     |   |    |   |         |         |  |
| -   | 158.24 | - out    |     |     |     |   |    |   |         |         |  |
| 507 | 158.26 | 0.066869 | 492 | 247 | 492 | 2 | 24 | 0 | 2.7e-14 | 9.6e-15 |  |
| -   | 158.26 | - out    |     |     |     |   |    |   |         |         |  |
| -   | 158.29 | - out    |     |     |     |   |    |   |         |         |  |
| -   | 158.32 | - out    |     |     |     |   |    |   |         |         |  |
| 508 | 158.32 | 0.066869 | 494 | 248 | 494 | 2 | 24 | 0 | 7.1e-14 | 8.2e-15 |  |
| -   | 158.35 | - out    |     |     |     |   |    |   |         |         |  |
| -   | 158.37 | - out    |     |     |     |   |    |   |         |         |  |
| 509 | 158.38 | 0.060182 | 496 | 249 | 496 | 2 | 24 | 0 | 3.7e-14 | 6.8e-15 |  |
| -   | 158.4  | - out    |     |     |     |   |    |   |         |         |  |
| -   | 158.43 | - out    |     |     |     |   |    |   |         |         |  |
| 510 | 158.44 | 0.060182 | 498 | 250 | 498 | 2 | 24 | 0 | 2.4e-14 | 4.8e-15 |  |



|     |        |          |     |     |     |   |    |   |         |         |
|-----|--------|----------|-----|-----|-----|---|----|---|---------|---------|
| -   | 158.46 | - out    |     |     |     |   |    |   |         |         |
| -   | 158.48 | - out    |     |     |     |   |    |   |         |         |
| 511 | 158.5  | 0.060182 | 500 | 251 | 500 | 2 | 24 | 0 | 1.2e-14 | 6.2e-15 |
| -   | 158.51 | - out    |     |     |     |   |    |   |         |         |
| -   | 158.54 | - out    |     |     |     |   |    |   |         |         |
| -   | 158.57 | - out    |     |     |     |   |    |   |         |         |
| 512 | 158.58 | 0.077343 | 504 | 253 | 504 | 2 | 25 | 0 | 4.1e-14 | 6.7e-15 |
| -   | 158.59 | - out    |     |     |     |   |    |   |         |         |
| -   | 158.62 | - out    |     |     |     |   |    |   |         |         |
| -   | 158.65 | - out    |     |     |     |   |    |   |         |         |
| 513 | 158.66 | 0.077343 | 506 | 254 | 506 | 2 | 25 | 0 | 1e-13   | 1.1e-14 |
| -   | 158.68 | - out    |     |     |     |   |    |   |         |         |
| -   | 158.7  | - out    |     |     |     |   |    |   |         |         |
| 514 | 158.73 | 0.069609 | 508 | 255 | 508 | 2 | 25 | 0 | 3.8e-13 | 1e-14   |
| -   | 158.73 | - out    |     |     |     |   |    |   |         |         |
| 515 | 158.8  | 0.069609 | 510 | 256 | 510 | 2 | 25 | 0 | 4.7e-13 | 5.3e-15 |

Number of vertex elements: 3

Number of boundary elements: 112

Number of vertex elements: 3

Number of boundary elements: 112

Number of elements: 534

Minimum element quality: 0.5661

Number of vertex elements: 4

Number of boundary elements: 162

Number of vertex elements: 5

Number of boundary elements: 212

Number of vertex elements: 6

Number of boundary elements: 266

Minimum element quality: 0.1631

Geometry shape function: Linear Lagrange

Time interval 3

Time-dependent solver (BDF)

Number of degrees of freedom solved for: 11758 (plus 7124 internal DOFs).

Nonsymmetric matrix found.

Scales for dependent variables:

Concentration (compl.cOx): 2.9

Concentration (compl.cRed): 1.9

Spatial mesh displacement (compl.spatial.disp): 1.8e-07

| Step | Time   | Stepsize | Res | Jac | Sol | Order | Tfail | NLfail | LinErr  | LinRes  |
|------|--------|----------|-----|-----|-----|-------|-------|--------|---------|---------|
| -    | 158.73 | - out    |     |     |     |       |       |        |         |         |
| -    | 158.73 | - out    |     |     |     |       |       |        |         |         |
| 516  | 158.76 | 0.0275   | 2   | 2   | 2   | 1     | 0     | 0      | 9.8e-14 | 2.7e-15 |
| -    | 158.76 | - out    |     |     |     |       |       |        |         |         |
| 517  | 158.78 | 0.0275   | 4   | 3   | 4   | 1     | 0     | 0      | 1.9e-13 | 3.6e-15 |
| -    | 158.79 | - out    |     |     |     |       |       |        |         |         |
| -    | 158.81 | - out    |     |     |     |       |       |        |         |         |
| 518  | 158.84 | 0.055    | 6   | 4   | 6   | 2     | 0     | 0      | 1.9e-13 | 2.4e-15 |
| -    | 158.84 | - out    |     |     |     |       |       |        |         |         |
| -    | 158.87 | - out    |     |     |     |       |       |        |         |         |
| 519  | 158.89 | 0.055    | 8   | 5   | 8   | 2     | 0     | 0      | 6.4e-13 | 4.1e-15 |
| -    | 158.9  | - out    |     |     |     |       |       |        |         |         |
| -    | 158.92 | - out    |     |     |     |       |       |        |         |         |
| -    | 158.95 | - out    |     |     |     |       |       |        |         |         |
| -    | 158.98 | - out    |     |     |     |       |       |        |         |         |
| 520  | 159    | 0.11     | 10  | 6   | 10  | 2     | 0     | 0      | 4.9e-13 | 4.4e-15 |
| -    | 159.01 | - out    |     |     |     |       |       |        |         |         |

|     |        |          |    |    |    |   |   |   |         |         |  |
|-----|--------|----------|----|----|----|---|---|---|---------|---------|--|
| -   | 159.03 | - out    |    |    |    |   |   |   |         |         |  |
| -   | 159.06 | - out    |    |    |    |   |   |   |         |         |  |
| -   | 159.09 | - out    |    |    |    |   |   |   |         |         |  |
| 521 | 159.11 | 0.11     | 12 | 7  | 12 | 2 | 0 | 0 | 9e-13   | 6.5e-15 |  |
| -   | 159.12 | - out    |    |    |    |   |   |   |         |         |  |
| -   | 159.14 | - out    |    |    |    |   |   |   |         |         |  |
| -   | 159.17 | - out    |    |    |    |   |   |   |         |         |  |
| -   | 159.2  | - out    |    |    |    |   |   |   |         |         |  |
| 522 | 159.22 | 0.11     | 14 | 8  | 14 | 2 | 0 | 0 | 1.1e-12 | 3.9e-15 |  |
| -   | 159.23 | - out    |    |    |    |   |   |   |         |         |  |
| -   | 159.25 | - out    |    |    |    |   |   |   |         |         |  |
| -   | 159.28 | - out    |    |    |    |   |   |   |         |         |  |
| -   | 159.31 | - out    |    |    |    |   |   |   |         |         |  |
| 523 | 159.33 | 0.11     | 16 | 9  | 16 | 2 | 0 | 0 | 8.9e-13 | 4.5e-15 |  |
| -   | 159.34 | - out    |    |    |    |   |   |   |         |         |  |
| -   | 159.36 | - out    |    |    |    |   |   |   |         |         |  |
| -   | 159.39 | - out    |    |    |    |   |   |   |         |         |  |
| -   | 159.42 | - out    |    |    |    |   |   |   |         |         |  |
| -   | 159.45 | - out    |    |    |    |   |   |   |         |         |  |
| -   | 159.47 | - out    |    |    |    |   |   |   |         |         |  |
| -   | 159.5  | - out    |    |    |    |   |   |   |         |         |  |
| -   | 159.53 | - out    |    |    |    |   |   |   |         |         |  |
| 524 | 159.55 | 0.22     | 18 | 10 | 18 | 2 | 0 | 0 | 1.4e-12 | 3.8e-15 |  |
| -   | 159.56 | - out    |    |    |    |   |   |   |         |         |  |
| -   | 159.58 | - out    |    |    |    |   |   |   |         |         |  |
| -   | 159.61 | - out    |    |    |    |   |   |   |         |         |  |
| -   | 159.64 | - out    |    |    |    |   |   |   |         |         |  |
| -   | 159.67 | - out    |    |    |    |   |   |   |         |         |  |
| -   | 159.69 | - out    |    |    |    |   |   |   |         |         |  |
| -   | 159.72 | - out    |    |    |    |   |   |   |         |         |  |
| -   | 159.75 | - out    |    |    |    |   |   |   |         |         |  |
| 525 | 159.77 | 0.22     | 20 | 11 | 20 | 2 | 0 | 0 | 6.4e-14 | 5.9e-15 |  |
| -   | 159.78 | - out    |    |    |    |   |   |   |         |         |  |
| -   | 159.8  | - out    |    |    |    |   |   |   |         |         |  |
| -   | 159.83 | - out    |    |    |    |   |   |   |         |         |  |
| -   | 159.86 | - out    |    |    |    |   |   |   |         |         |  |
| -   | 159.89 | - out    |    |    |    |   |   |   |         |         |  |
| -   | 159.91 | - out    |    |    |    |   |   |   |         |         |  |
| -   | 159.94 | - out    |    |    |    |   |   |   |         |         |  |
| -   | 159.97 | - out    |    |    |    |   |   |   |         |         |  |
| 526 | 159.99 | 0.21337  | 24 | 13 | 24 | 2 | 1 | 0 | 3.9e-13 | 2.7e-15 |  |
| -   | 160    | - out    |    |    |    |   |   |   |         |         |  |
| -   | 160.02 | - out    |    |    |    |   |   |   |         |         |  |
| -   | 160.05 | - out    |    |    |    |   |   |   |         |         |  |
| -   | 160.08 | - out    |    |    |    |   |   |   |         |         |  |
| -   | 160.11 | - out    |    |    |    |   |   |   |         |         |  |
| -   | 160.13 | - out    |    |    |    |   |   |   |         |         |  |
| -   | 160.16 | - out    |    |    |    |   |   |   |         |         |  |
| -   | 160.19 | - out    |    |    |    |   |   |   |         |         |  |
| 527 | 160.2  | 0.21337  | 26 | 14 | 26 | 2 | 1 | 0 | 1e-12   | 6.3e-15 |  |
| -   | 160.22 | - out    |    |    |    |   |   |   |         |         |  |
| -   | 160.24 | - out    |    |    |    |   |   |   |         |         |  |
| -   | 160.27 | - out    |    |    |    |   |   |   |         |         |  |
| 528 | 160.29 | 0.095507 | 30 | 16 | 30 | 2 | 2 | 0 | 1.2e-13 | 4.8e-15 |  |
| -   | 160.3  | - out    |    |    |    |   |   |   |         |         |  |
| -   | 160.33 | - out    |    |    |    |   |   |   |         |         |  |

|     |        |          |    |    |    |   |   |   |         |         |
|-----|--------|----------|----|----|----|---|---|---|---------|---------|
| -   | 160.35 | - out    |    |    |    |   |   |   |         |         |
| -   | 160.38 | - out    |    |    |    |   |   |   |         |         |
| 529 | 160.39 | 0.095507 | 32 | 17 | 32 | 2 | 2 | 0 | 2.6e-13 | 4.6e-15 |
| -   | 160.41 | - out    |    |    |    |   |   |   |         |         |
| -   | 160.44 | - out    |    |    |    |   |   |   |         |         |
| -   | 160.46 | - out    |    |    |    |   |   |   |         |         |
| 530 | 160.47 | 0.083902 | 34 | 18 | 34 | 2 | 2 | 0 | 1.7e-13 | 4.5e-15 |
| -   | 160.49 | - out    |    |    |    |   |   |   |         |         |
| -   | 160.52 | - out    |    |    |    |   |   |   |         |         |
| -   | 160.55 | - out    |    |    |    |   |   |   |         |         |
| 531 | 160.55 | 0.074598 | 36 | 19 | 36 | 2 | 2 | 0 | 4.7e-14 | 4.7e-15 |
| -   | 160.57 | - out    |    |    |    |   |   |   |         |         |
| -   | 160.6  | - out    |    |    |    |   |   |   |         |         |
| 532 | 160.62 | 0.074598 | 38 | 20 | 38 | 2 | 2 | 0 | 5.6e-14 | 5e-15   |
| -   | 160.63 | - out    |    |    |    |   |   |   |         |         |
| -   | 160.66 | - out    |    |    |    |   |   |   |         |         |
| -   | 160.68 | - out    |    |    |    |   |   |   |         |         |
| 533 | 160.7  | 0.074598 | 40 | 21 | 40 | 2 | 2 | 0 | 1.3e-13 | 4.8e-15 |
| -   | 160.71 | - out    |    |    |    |   |   |   |         |         |
| -   | 160.74 | - out    |    |    |    |   |   |   |         |         |
| -   | 160.77 | - out    |    |    |    |   |   |   |         |         |
| 534 | 160.77 | 0.074598 | 42 | 22 | 42 | 2 | 2 | 0 | 7.1e-14 | 4.8e-15 |
| -   | 160.79 | - out    |    |    |    |   |   |   |         |         |
| -   | 160.82 | - out    |    |    |    |   |   |   |         |         |
| 535 | 160.85 | 0.074598 | 44 | 23 | 44 | 2 | 2 | 0 | 1.7e-13 | 6.3e-15 |
| -   | 160.85 | - out    |    |    |    |   |   |   |         |         |
| -   | 160.88 | - out    |    |    |    |   |   |   |         |         |
| -   | 160.9  | - out    |    |    |    |   |   |   |         |         |
| 536 | 160.91 | 0.067138 | 46 | 24 | 46 | 2 | 2 | 0 | 7.8e-14 | 5.2e-15 |
| -   | 160.93 | - out    |    |    |    |   |   |   |         |         |
| -   | 160.96 | - out    |    |    |    |   |   |   |         |         |
| 537 | 160.98 | 0.067138 | 48 | 25 | 48 | 2 | 2 | 0 | 1.3e-13 | 5.1e-15 |
| -   | 160.99 | - out    |    |    |    |   |   |   |         |         |
| -   | 161.01 | - out    |    |    |    |   |   |   |         |         |
| -   | 161.04 | - out    |    |    |    |   |   |   |         |         |
| 538 | 161.05 | 0.067138 | 50 | 26 | 50 | 2 | 2 | 0 | 6.2e-14 | 5.6e-15 |
| -   | 161.07 | - out    |    |    |    |   |   |   |         |         |
| -   | 161.1  | - out    |    |    |    |   |   |   |         |         |
| 539 | 161.12 | 0.067138 | 52 | 27 | 52 | 2 | 2 | 0 | 2.1e-13 | 3.7e-15 |
| -   | 161.12 | - out    |    |    |    |   |   |   |         |         |
| -   | 161.15 | - out    |    |    |    |   |   |   |         |         |
| -   | 161.18 | - out    |    |    |    |   |   |   |         |         |
| 540 | 161.18 | 0.067138 | 54 | 28 | 54 | 2 | 2 | 0 | 1.5e-13 | 4.7e-15 |
| -   | 161.21 | - out    |    |    |    |   |   |   |         |         |
| -   | 161.23 | - out    |    |    |    |   |   |   |         |         |
| 541 | 161.25 | 0.067138 | 56 | 29 | 56 | 2 | 2 | 0 | 2.6e-13 | 3.5e-15 |
| -   | 161.26 | - out    |    |    |    |   |   |   |         |         |
| -   | 161.29 | - out    |    |    |    |   |   |   |         |         |
| -   | 161.32 | - out    |    |    |    |   |   |   |         |         |
| 542 | 161.32 | 0.067138 | 58 | 30 | 58 | 2 | 2 | 0 | 2.8e-13 | 3.9e-15 |
| -   | 161.34 | - out    |    |    |    |   |   |   |         |         |
| -   | 161.37 | - out    |    |    |    |   |   |   |         |         |
| 543 | 161.38 | 0.067138 | 60 | 31 | 60 | 2 | 2 | 0 | 4.8e-13 | 5.8e-15 |
| -   | 161.4  | - out    |    |    |    |   |   |   |         |         |
| -   | 161.43 | - out    |    |    |    |   |   |   |         |         |
| 544 | 161.45 | 0.067138 | 62 | 32 | 62 | 2 | 2 | 0 | 1.6e-13 | 2.8e-15 |

|     |        |          |    |    |    |   |   |   |         |         |
|-----|--------|----------|----|----|----|---|---|---|---------|---------|
| -   | 161.45 | - out    |    |    |    |   |   |   |         |         |
| -   | 161.48 | - out    |    |    |    |   |   |   |         |         |
| -   | 161.51 | - out    |    |    |    |   |   |   |         |         |
| 545 | 161.52 | 0.067138 | 64 | 33 | 64 | 2 | 2 | 0 | 4.3e-13 | 5.4e-15 |
| -   | 161.54 | - out    |    |    |    |   |   |   |         |         |
| -   | 161.56 | - out    |    |    |    |   |   |   |         |         |
| 546 | 161.59 | 0.067138 | 66 | 34 | 66 | 2 | 2 | 0 | 2.6e-13 | 4.8e-15 |
| -   | 161.59 | - out    |    |    |    |   |   |   |         |         |
| -   | 161.62 | - out    |    |    |    |   |   |   |         |         |
| -   | 161.65 | - out    |    |    |    |   |   |   |         |         |
| 547 | 161.65 | 0.067138 | 68 | 35 | 68 | 2 | 2 | 0 | 1e-12   | 5.1e-15 |
| -   | 161.67 | - out    |    |    |    |   |   |   |         |         |
| -   | 161.7  | - out    |    |    |    |   |   |   |         |         |
| -   | 161.73 | - out    |    |    |    |   |   |   |         |         |
| -   | 161.76 | - out    |    |    |    |   |   |   |         |         |
| -   | 161.78 | - out    |    |    |    |   |   |   |         |         |
| 548 | 161.79 | 0.13428  | 70 | 36 | 70 | 2 | 2 | 0 | 1.6e-12 | 5.7e-15 |
| -   | 161.81 | - out    |    |    |    |   |   |   |         |         |
| -   | 161.84 | - out    |    |    |    |   |   |   |         |         |
| -   | 161.87 | - out    |    |    |    |   |   |   |         |         |
| -   | 161.89 | - out    |    |    |    |   |   |   |         |         |
| -   | 161.92 | - out    |    |    |    |   |   |   |         |         |
| 549 | 161.92 | 0.13428  | 72 | 37 | 72 | 2 | 2 | 0 | 2.8e-12 | 9.1e-15 |
| -   | 161.95 | - out    |    |    |    |   |   |   |         |         |
| -   | 161.98 | - out    |    |    |    |   |   |   |         |         |
| -   | 162    | - out    |    |    |    |   |   |   |         |         |
| -   | 162.03 | - out    |    |    |    |   |   |   |         |         |
| 550 | 162.06 | 0.13428  | 74 | 38 | 74 | 2 | 2 | 0 | 6.7e-13 | 5.8e-15 |
| -   | 162.06 | - out    |    |    |    |   |   |   |         |         |
| -   | 162.09 | - out    |    |    |    |   |   |   |         |         |
| -   | 162.11 | - out    |    |    |    |   |   |   |         |         |
| -   | 162.14 | - out    |    |    |    |   |   |   |         |         |
| -   | 162.17 | - out    |    |    |    |   |   |   |         |         |
| 551 | 162.19 | 0.13428  | 76 | 39 | 76 | 2 | 2 | 0 | 6.5e-13 | 4.9e-15 |
| -   | 162.2  | - out    |    |    |    |   |   |   |         |         |
| -   | 162.22 | - out    |    |    |    |   |   |   |         |         |
| -   | 162.25 | - out    |    |    |    |   |   |   |         |         |
| -   | 162.28 | - out    |    |    |    |   |   |   |         |         |
| -   | 162.31 | - out    |    |    |    |   |   |   |         |         |
| -   | 162.33 | - out    |    |    |    |   |   |   |         |         |
| -   | 162.36 | - out    |    |    |    |   |   |   |         |         |
| -   | 162.39 | - out    |    |    |    |   |   |   |         |         |
| -   | 162.42 | - out    |    |    |    |   |   |   |         |         |
| -   | 162.44 | - out    |    |    |    |   |   |   |         |         |
| 552 | 162.46 | 0.26855  | 78 | 40 | 78 | 2 | 2 | 0 | 1.2e-13 | 6.5e-15 |
| -   | 162.47 | - out    |    |    |    |   |   |   |         |         |
| -   | 162.5  | - out    |    |    |    |   |   |   |         |         |
| -   | 162.53 | - out    |    |    |    |   |   |   |         |         |
| -   | 162.55 | - out    |    |    |    |   |   |   |         |         |
| -   | 162.58 | - out    |    |    |    |   |   |   |         |         |
| -   | 162.61 | - out    |    |    |    |   |   |   |         |         |
| -   | 162.64 | - out    |    |    |    |   |   |   |         |         |
| -   | 162.66 | - out    |    |    |    |   |   |   |         |         |
| -   | 162.69 | - out    |    |    |    |   |   |   |         |         |
| -   | 162.72 | - out    |    |    |    |   |   |   |         |         |
| 553 | 162.73 | 0.26855  | 80 | 41 | 80 | 2 | 2 | 0 | 3.2e-13 | 3.2e-15 |

|     |        |          |     |     |    |     |   |   |   |         |         |
|-----|--------|----------|-----|-----|----|-----|---|---|---|---------|---------|
| -   | 162.75 | -        | out |     |    |     |   |   |   |         |         |
| -   | 162.77 | -        | out |     |    |     |   |   |   |         |         |
| -   | 162.8  | -        | out |     |    |     |   |   |   |         |         |
| -   | 162.83 | -        | out |     |    |     |   |   |   |         |         |
| -   | 162.86 | -        | out |     |    |     |   |   |   |         |         |
| -   | 162.88 | -        | out |     |    |     |   |   |   |         |         |
| 554 | 162.89 | 0.1614   |     | 84  | 43 | 84  | 2 | 3 | 0 | 1.7e-12 | 4.2e-15 |
| -   | 162.91 | -        | out |     |    |     |   |   |   |         |         |
| -   | 162.94 | -        | out |     |    |     |   |   |   |         |         |
| -   | 162.97 | -        | out |     |    |     |   |   |   |         |         |
| -   | 162.99 | -        | out |     |    |     |   |   |   |         |         |
| -   | 163.02 | -        | out |     |    |     |   |   |   |         |         |
| -   | 163.05 | -        | out |     |    |     |   |   |   |         |         |
| 555 | 163.05 | 0.1614   |     | 86  | 44 | 86  | 2 | 3 | 0 | 2.9e-13 | 3.4e-15 |
| -   | 163.08 | -        | out |     |    |     |   |   |   |         |         |
| -   | 163.1  | -        | out |     |    |     |   |   |   |         |         |
| -   | 163.13 | -        | out |     |    |     |   |   |   |         |         |
| 556 | 163.15 | 0.095381 |     | 90  | 46 | 90  | 2 | 4 | 0 | 2.5e-13 | 4.3e-15 |
| -   | 163.16 | -        | out |     |    |     |   |   |   |         |         |
| -   | 163.19 | -        | out |     |    |     |   |   |   |         |         |
| -   | 163.21 | -        | out |     |    |     |   |   |   |         |         |
| -   | 163.24 | -        | out |     |    |     |   |   |   |         |         |
| 557 | 163.24 | 0.095381 |     | 92  | 47 | 92  | 2 | 4 | 0 | 1.5e-13 | 3.2e-15 |
| -   | 163.27 | -        | out |     |    |     |   |   |   |         |         |
| -   | 163.3  | -        | out |     |    |     |   |   |   |         |         |
| -   | 163.32 | -        | out |     |    |     |   |   |   |         |         |
| 558 | 163.33 | 0.085069 |     | 94  | 48 | 94  | 2 | 4 | 0 | 1.9e-14 | 2.8e-15 |
| -   | 163.35 | -        | out |     |    |     |   |   |   |         |         |
| -   | 163.38 | -        | out |     |    |     |   |   |   |         |         |
| 559 | 163.4  | 0.071344 |     | 96  | 49 | 96  | 2 | 4 | 0 | 1e-13   | 6.1e-15 |
| -   | 163.41 | -        | out |     |    |     |   |   |   |         |         |
| -   | 163.43 | -        | out |     |    |     |   |   |   |         |         |
| -   | 163.46 | -        | out |     |    |     |   |   |   |         |         |
| 560 | 163.46 | 0.06421  |     | 98  | 50 | 98  | 2 | 4 | 0 | 1e-13   | 5.5e-15 |
| -   | 163.49 | -        | out |     |    |     |   |   |   |         |         |
| -   | 163.52 | -        | out |     |    |     |   |   |   |         |         |
| 561 | 163.53 | 0.06421  |     | 100 | 51 | 100 | 2 | 4 | 0 | 9.4e-14 | 4.1e-15 |
| -   | 163.54 | -        | out |     |    |     |   |   |   |         |         |
| -   | 163.57 | -        | out |     |    |     |   |   |   |         |         |
| 562 | 163.59 | 0.06421  |     | 102 | 52 | 102 | 2 | 4 | 0 | 7.5e-15 | 9.4e-15 |
| -   | 163.6  | -        | out |     |    |     |   |   |   |         |         |
| -   | 163.63 | -        | out |     |    |     |   |   |   |         |         |
| -   | 163.65 | -        | out |     |    |     |   |   |   |         |         |
| 563 | 163.65 | 0.06421  |     | 104 | 53 | 104 | 2 | 4 | 0 | 2.5e-14 | 3.9e-15 |
| -   | 163.68 | -        | out |     |    |     |   |   |   |         |         |
| -   | 163.71 | -        | out |     |    |     |   |   |   |         |         |
| 564 | 163.72 | 0.06421  |     | 106 | 54 | 106 | 2 | 4 | 0 | 2.9e-14 | 3.7e-15 |
| -   | 163.74 | -        | out |     |    |     |   |   |   |         |         |
| -   | 163.76 | -        | out |     |    |     |   |   |   |         |         |
| 565 | 163.78 | 0.06421  |     | 108 | 55 | 108 | 2 | 4 | 0 | 1.2e-14 | 4.8e-15 |
| -   | 163.79 | -        | out |     |    |     |   |   |   |         |         |
| -   | 163.82 | -        | out |     |    |     |   |   |   |         |         |
| -   | 163.85 | -        | out |     |    |     |   |   |   |         |         |
| 566 | 163.85 | 0.06421  |     | 110 | 56 | 110 | 2 | 4 | 0 | 3.9e-14 | 7.1e-15 |
| -   | 163.87 | -        | out |     |    |     |   |   |   |         |         |
| -   | 163.9  | -        | out |     |    |     |   |   |   |         |         |

|     |        |         |     |    |     |   |   |   |         |         |
|-----|--------|---------|-----|----|-----|---|---|---|---------|---------|
| 567 | 163.91 | 0.06421 | 112 | 57 | 112 | 2 | 4 | 0 | 8.3e-14 | 4.2e-15 |
| -   | 163.93 | - out   |     |    |     |   |   |   |         |         |
| -   | 163.96 | - out   |     |    |     |   |   |   |         |         |
| 568 | 163.97 | 0.06421 | 114 | 58 | 114 | 2 | 4 | 0 | 1e-14   | 6.3e-15 |
| -   | 163.98 | - out   |     |    |     |   |   |   |         |         |
| -   | 164.01 | - out   |     |    |     |   |   |   |         |         |
| -   | 164.04 | - out   |     |    |     |   |   |   |         |         |
| 569 | 164.04 | 0.06421 | 116 | 59 | 116 | 2 | 4 | 0 | 1.1e-13 | 4.5e-15 |
| -   | 164.07 | - out   |     |    |     |   |   |   |         |         |
| -   | 164.09 | - out   |     |    |     |   |   |   |         |         |
| 570 | 164.1  | 0.06421 | 118 | 60 | 118 | 2 | 4 | 0 | 9.3e-14 | 4.9e-15 |
| -   | 164.12 | - out   |     |    |     |   |   |   |         |         |
| -   | 164.15 | - out   |     |    |     |   |   |   |         |         |
| 571 | 164.17 | 0.06421 | 120 | 61 | 120 | 2 | 4 | 0 | 2.5e-13 | 3.3e-15 |
| -   | 164.18 | - out   |     |    |     |   |   |   |         |         |
| -   | 164.2  | - out   |     |    |     |   |   |   |         |         |
| -   | 164.23 | - out   |     |    |     |   |   |   |         |         |
| 572 | 164.23 | 0.06421 | 122 | 62 | 122 | 2 | 4 | 0 | 2.3e-13 | 4.8e-15 |
| -   | 164.26 | - out   |     |    |     |   |   |   |         |         |
| -   | 164.29 | - out   |     |    |     |   |   |   |         |         |
| 573 | 164.3  | 0.06421 | 124 | 63 | 124 | 2 | 4 | 0 | 5.2e-13 | 8.9e-15 |
| -   | 164.31 | - out   |     |    |     |   |   |   |         |         |
| -   | 164.34 | - out   |     |    |     |   |   |   |         |         |
| 574 | 164.36 | 0.06421 | 126 | 64 | 126 | 2 | 4 | 0 | 2.9e-13 | 3e-15   |
| -   | 164.37 | - out   |     |    |     |   |   |   |         |         |
| -   | 164.4  | - out   |     |    |     |   |   |   |         |         |
| -   | 164.42 | - out   |     |    |     |   |   |   |         |         |
| 575 | 164.42 | 0.06421 | 128 | 65 | 128 | 2 | 4 | 0 | 6.5e-13 | 5.7e-15 |
| -   | 164.45 | - out   |     |    |     |   |   |   |         |         |
| -   | 164.48 | - out   |     |    |     |   |   |   |         |         |
| 576 | 164.49 | 0.06421 | 130 | 66 | 130 | 2 | 4 | 0 | 1.6e-12 | 3.9e-15 |
| -   | 164.51 | - out   |     |    |     |   |   |   |         |         |
| -   | 164.53 | - out   |     |    |     |   |   |   |         |         |
| 577 | 164.55 | 0.06421 | 132 | 67 | 132 | 2 | 4 | 0 | 1.2e-12 | 5.3e-15 |
| -   | 164.56 | - out   |     |    |     |   |   |   |         |         |
| -   | 164.59 | - out   |     |    |     |   |   |   |         |         |
| -   | 164.62 | - out   |     |    |     |   |   |   |         |         |
| -   | 164.64 | - out   |     |    |     |   |   |   |         |         |
| -   | 164.67 | - out   |     |    |     |   |   |   |         |         |
| 578 | 164.68 | 0.12842 | 134 | 68 | 134 | 2 | 4 | 0 | 3.6e-12 | 4.7e-15 |
| -   | 164.7  | - out   |     |    |     |   |   |   |         |         |
| -   | 164.73 | - out   |     |    |     |   |   |   |         |         |
| -   | 164.75 | - out   |     |    |     |   |   |   |         |         |
| -   | 164.78 | - out   |     |    |     |   |   |   |         |         |
| -   | 164.81 | - out   |     |    |     |   |   |   |         |         |
| 579 | 164.81 | 0.12842 | 136 | 69 | 136 | 2 | 4 | 0 | 2e-12   | 7.4e-15 |
| -   | 164.84 | - out   |     |    |     |   |   |   |         |         |
| -   | 164.86 | - out   |     |    |     |   |   |   |         |         |
| -   | 164.89 | - out   |     |    |     |   |   |   |         |         |
| -   | 164.92 | - out   |     |    |     |   |   |   |         |         |
| 580 | 164.94 | 0.12842 | 138 | 70 | 138 | 2 | 4 | 0 | 1.3e-12 | 4.7e-15 |
| -   | 164.95 | - out   |     |    |     |   |   |   |         |         |
| -   | 164.97 | - out   |     |    |     |   |   |   |         |         |
| -   | 165    | - out   |     |    |     |   |   |   |         |         |
| 581 | 165.19 | 0.25684 | 140 | 71 | 140 | 2 | 4 | 0 | 4.2e-13 | 4.3e-15 |

Time-stepping completed.

Geometry shape function: Linear Lagrange  
 Solution time: 703 s. (11 minutes, 43 seconds)  
 Physical memory: 2.78 GB  
 Virtual memory: 2.87 GB  
 Ended at May 31, 2023 11:03:22 AM.

----- Time-Dependent Solver 1 in Study 3 (CV 21 to 30)/Solution 6 (sol6) ----->

### Advanced (aDef)

#### ASSEMBLY SETTINGS

| Description            | Value |
|------------------------|-------|
| Reuse sparsity pattern | On    |

### Fully Coupled 1 (fc1)

#### GENERAL

| Description   | Value                    |
|---------------|--------------------------|
| Linear solver | <a href="#">Direct 1</a> |

#### METHOD AND TERMINATION

| Description                    | Value                 |
|--------------------------------|-----------------------|
| Damping factor                 | 0.9                   |
| Jacobian update                | Once per time step    |
| Maximum number of iterations   | 8                     |
| Stabilization and acceleration | Anderson acceleration |
| Dimension of iteration space   | 5                     |

### Automatic Remeshing 1 (ar1)

#### GENERAL

| Description        | Value                      |
|--------------------|----------------------------|
| Remesh in geometry | <a href="#">Geometry 1</a> |

#### CONDITION FOR REMESHING

| Description    | Value      |
|----------------|------------|
| Condition type | Distortion |

#### OUTPUT

| Description | Value                               |
|-------------|-------------------------------------|
| Solution    | <a href="#">Remeshed Solution 3</a> |
| Meshes      | {mesh4, mesh5}                      |

## 6 Study 4 (CV 31 to 38)

### COMPUTATION INFORMATION

|                  |             |
|------------------|-------------|
| Computation time | 10 min 42 s |
|------------------|-------------|

### 6.1 TIME DEPENDENT

| Times                               | Unit |
|-------------------------------------|------|
| range(30*t_cv,t_tot/nb/200,38*t_cv) | s    |

### STUDY SETTINGS

| Description                    | Value |
|--------------------------------|-------|
| Include geometric nonlinearity | Off   |

### STUDY SETTINGS

| Description  | Value                                                                                                                                                                                                                                                                                                                                                                                                                                                                                                                                                                                                                                                                                                                                                                                                                                                                                                                                                                                                                                                                                                                                                                                                                                                                                                                                                                                                                                                                                                                                                                                                                                                                                                                                                                                                                                                                                                                                |
|--------------|--------------------------------------------------------------------------------------------------------------------------------------------------------------------------------------------------------------------------------------------------------------------------------------------------------------------------------------------------------------------------------------------------------------------------------------------------------------------------------------------------------------------------------------------------------------------------------------------------------------------------------------------------------------------------------------------------------------------------------------------------------------------------------------------------------------------------------------------------------------------------------------------------------------------------------------------------------------------------------------------------------------------------------------------------------------------------------------------------------------------------------------------------------------------------------------------------------------------------------------------------------------------------------------------------------------------------------------------------------------------------------------------------------------------------------------------------------------------------------------------------------------------------------------------------------------------------------------------------------------------------------------------------------------------------------------------------------------------------------------------------------------------------------------------------------------------------------------------------------------------------------------------------------------------------------------|
| Output times | {165.00000000000003, 165.02750000000003, 165.05500000000004, 165.08250000000004, 165.11000000000004, 165.13750000000002, 165.16500000000002, 165.19250000000002, 165.22000000000003, 165.24750000000003, 165.27500000000003, 165.30250000000004, 165.33000000000004, 165.35750000000002, 165.38500000000002, 165.41250000000002, 165.44000000000003, 165.46750000000003, 165.49500000000003, 165.52250000000004, 165.55000000000004, 165.57750000000001, 165.60500000000002, 165.63250000000002, 165.66000000000003, 165.68750000000003, 165.71500000000003, 165.74250000000004, 165.77000000000004, 165.79750000000004, 165.82500000000002, 165.85250000000002, 165.88000000000002, 165.90750000000003, 165.93500000000003, 165.96250000000003, 165.99000000000004, 166.01750000000004, 166.04500000000002, 166.07250000000002, 166.10000000000002, 166.12750000000003, 166.15500000000003, 166.18250000000003, 166.21000000000004, 166.23750000000004, 166.26500000000001, 166.29250000000002, 166.32000000000002, 166.34750000000003, 166.37500000000003, 166.40250000000003, 166.43000000000004, 166.45750000000004, 166.48500000000004, 166.51250000000002, 166.54000000000002, 166.56750000000002, 166.59500000000003, 166.62250000000003, 166.65000000000003, 166.67750000000004, 166.70500000000004, 166.73250000000002, 166.76000000000002, 166.78750000000002, 166.81500000000003, 166.84250000000003, 166.87000000000003, 166.89750000000004, 166.92500000000004, 166.95250000000001, 166.98000000000002, 167.00750000000002, 167.03500000000003, 167.06250000000003, 167.09000000000003, 167.11750000000004, 167.14500000000004, 167.17250000000004, 167.20000000000002, 167.22750000000002, 167.25500000000002, 167.28250000000003, 167.31000000000003, 167.33750000000003, 167.36500000000004, 167.39250000000004, 167.42000000000002, 167.44750000000002, 167.47500000000002, 167.50250000000003, 167.53000000000003} |



| Description | Value                                                                                                                                                                                                                                                                                                                                                                                                                                                                                                                                                                                                                                                                                                                                                                                                                                                                                                                                                                                                                                                                                                                                                                                                                                                                                                                                                                                                                                                                                                                                                                                                                                                                                                                                                                                                                                                                                                                                                                                                                                                                                                                                                                                                                                                                                                                                                                                                                                                                                                                                                                                                                                                                                                                                                                                                                                                                                                                                                                                                                                                                                                                                        |
|-------------|----------------------------------------------------------------------------------------------------------------------------------------------------------------------------------------------------------------------------------------------------------------------------------------------------------------------------------------------------------------------------------------------------------------------------------------------------------------------------------------------------------------------------------------------------------------------------------------------------------------------------------------------------------------------------------------------------------------------------------------------------------------------------------------------------------------------------------------------------------------------------------------------------------------------------------------------------------------------------------------------------------------------------------------------------------------------------------------------------------------------------------------------------------------------------------------------------------------------------------------------------------------------------------------------------------------------------------------------------------------------------------------------------------------------------------------------------------------------------------------------------------------------------------------------------------------------------------------------------------------------------------------------------------------------------------------------------------------------------------------------------------------------------------------------------------------------------------------------------------------------------------------------------------------------------------------------------------------------------------------------------------------------------------------------------------------------------------------------------------------------------------------------------------------------------------------------------------------------------------------------------------------------------------------------------------------------------------------------------------------------------------------------------------------------------------------------------------------------------------------------------------------------------------------------------------------------------------------------------------------------------------------------------------------------------------------------------------------------------------------------------------------------------------------------------------------------------------------------------------------------------------------------------------------------------------------------------------------------------------------------------------------------------------------------------------------------------------------------------------------------------------------------|
|             | 167.55750000000003, 167.58500000000004, 167.61250000000004,<br>167.64000000000004, 167.66750000000002, 167.69500000000002,<br>167.72250000000003, 167.75000000000003, 167.77750000000003,<br>167.80500000000004, 167.83250000000004, 167.86000000000004,<br>167.88750000000002, 167.91500000000002, 167.94250000000002,<br>167.97000000000003, 167.99750000000003, 168.02500000000003,<br>168.05250000000004, 168.08000000000004, 168.10750000000002,<br>168.13500000000002, 168.16250000000002, 168.19000000000003,<br>168.21750000000003, 168.24500000000003, 168.27250000000004,<br>168.30000000000004, 168.32750000000004, 168.35500000000002,<br>168.38250000000002, 168.41000000000003, 168.43750000000003,<br>168.46500000000003, 168.49250000000004, 168.52000000000004,<br>168.54750000000004, 168.57500000000002, 168.60250000000002,<br>168.63000000000002, 168.65750000000003, 168.68500000000003,<br>168.71250000000003, 168.74000000000004, 168.76750000000004,<br>168.79500000000002, 168.82250000000002, 168.85000000000002,<br>168.87750000000003, 168.90500000000003, 168.93250000000003,<br>168.96000000000004, 168.98750000000004, 169.01500000000004,<br>169.04250000000002, 169.07000000000002, 169.09750000000003,<br>169.12500000000003, 169.15250000000003, 169.18000000000004,<br>169.20750000000004, 169.23500000000004, 169.26250000000002,<br>169.29000000000002, 169.31750000000002, 169.34500000000003,<br>169.37250000000003, 169.40000000000003, 169.42750000000004,<br>169.45500000000004, 169.48250000000002, 169.51000000000002,<br>169.53750000000002, 169.56500000000003, 169.59250000000003,<br>169.62000000000003, 169.64750000000004, 169.67500000000004,<br>169.70250000000004, 169.73000000000002, 169.75750000000002,<br>169.78500000000003, 169.81250000000003, 169.84000000000003,<br>169.86750000000004, 169.89500000000004, 169.92250000000004,<br>169.95000000000002, 169.97750000000002, 170.00500000000002,<br>170.03250000000003, 170.06000000000003, 170.08750000000003,<br>170.11500000000004, 170.14250000000004, 170.17000000000002,<br>170.19750000000002, 170.22500000000002, 170.25250000000003,<br>170.28000000000003, 170.30750000000003, 170.33500000000004,<br>170.36250000000004, 170.39000000000004, 170.41750000000002,<br>170.44500000000002, 170.47250000000003, 170.50000000000003,<br>170.52750000000003, 170.55500000000004, 170.58250000000004,<br>170.61000000000004, 170.63750000000002, 170.66500000000002,<br>170.69250000000002, 170.72000000000003, 170.74750000000003,<br>170.77500000000003, 170.80250000000004, 170.83000000000004,<br>170.85750000000002, 170.88500000000002, 170.91250000000002,<br>170.94000000000003, 170.96750000000003, 170.99500000000003,<br>171.02250000000004, 171.05000000000004, 171.07750000000004,<br>171.10500000000002, 171.13250000000002, 171.16000000000003,<br>171.18750000000003, 171.21500000000003, 171.24250000000004,<br>171.27000000000004, 171.29750000000004, 171.32500000000002,<br>171.35250000000002, 171.38000000000002, 171.40750000000003,<br>171.43500000000003, 171.46250000000003, 171.49000000000004, |

| Description | Value                                                                                                                                                                                                                                                                                                                                                                                                                                                                                                                                                                                                                                                                                                                                                                                                                                                                                                                                                                                                                                                                                                                                                                                                                                                                                                                                                                                                                                                                                                                                                                                                                                                                                                                                                                                                                                                                                                                                                                                                                                                                                                                                                                                                                                                                                                                                                                                                                                                                                                                                                                                                                                                                                                                                                                                                                                                                                                                                                                                           |
|-------------|-------------------------------------------------------------------------------------------------------------------------------------------------------------------------------------------------------------------------------------------------------------------------------------------------------------------------------------------------------------------------------------------------------------------------------------------------------------------------------------------------------------------------------------------------------------------------------------------------------------------------------------------------------------------------------------------------------------------------------------------------------------------------------------------------------------------------------------------------------------------------------------------------------------------------------------------------------------------------------------------------------------------------------------------------------------------------------------------------------------------------------------------------------------------------------------------------------------------------------------------------------------------------------------------------------------------------------------------------------------------------------------------------------------------------------------------------------------------------------------------------------------------------------------------------------------------------------------------------------------------------------------------------------------------------------------------------------------------------------------------------------------------------------------------------------------------------------------------------------------------------------------------------------------------------------------------------------------------------------------------------------------------------------------------------------------------------------------------------------------------------------------------------------------------------------------------------------------------------------------------------------------------------------------------------------------------------------------------------------------------------------------------------------------------------------------------------------------------------------------------------------------------------------------------------------------------------------------------------------------------------------------------------------------------------------------------------------------------------------------------------------------------------------------------------------------------------------------------------------------------------------------------------------------------------------------------------------------------------------------------------|
|             | 171.51750000000004, 171.54500000000002, 171.57250000000002, 171.60000000000002, 171.62750000000003, 171.65500000000003, 171.68250000000003, 171.71000000000004, 171.73750000000004, 171.76500000000004, 171.79250000000002, 171.82000000000002, 171.84750000000003, 171.87500000000003, 171.90250000000003, 171.93000000000004, 171.95750000000004, 171.98500000000004, 172.01250000000002, 172.04000000000002, 172.06750000000002, 172.09500000000003, 172.12250000000003, 172.15000000000003, 172.17750000000004, 172.20500000000004, 172.23250000000002, 172.26000000000002, 172.28750000000002, 172.31500000000003, 172.34250000000003, 172.37000000000003, 172.39750000000004, 172.42500000000004, 172.45250000000004, 172.48000000000002, 172.50750000000002, 172.53500000000003, 172.56250000000003, 172.59000000000003, 172.61750000000004, 172.64500000000004, 172.67250000000004, 172.70000000000002, 172.72750000000002, 172.75500000000002, 172.78250000000003, 172.81000000000003, 172.83750000000003, 172.86500000000004, 172.89250000000004, 172.92000000000002, 172.94750000000002, 172.97500000000002, 173.00250000000003, 173.03000000000003, 173.05750000000003, 173.08500000000004, 173.11250000000004, 173.14000000000004, 173.16750000000002, 173.19500000000002, 173.22250000000003, 173.25000000000003, 173.27750000000003, 173.30500000000004, 173.33250000000004, 173.36000000000004, 173.38750000000002, 173.41500000000002, 173.44250000000002, 173.47000000000003, 173.49750000000003, 173.52500000000003, 173.55250000000004, 173.58000000000004, 173.60750000000002, 173.63500000000002, 173.66250000000002, 173.69000000000003, 173.71750000000003, 173.74500000000003, 173.77250000000004, 173.80000000000004, 173.82750000000004, 173.85500000000002, 173.88250000000002, 173.91000000000003, 173.93750000000003, 173.96500000000003, 173.99250000000004, 174.02000000000004, 174.04750000000004, 174.07500000000002, 174.10250000000002, 174.13000000000002, 174.15750000000003, 174.18500000000003, 174.21250000000003, 174.24000000000004, 174.26750000000004, 174.29500000000002, 174.32250000000002, 174.35000000000002, 174.37750000000003, 174.40500000000003, 174.43250000000003, 174.46000000000004, 174.48750000000004, 174.51500000000004, 174.54250000000002, 174.57000000000002, 174.59750000000003, 174.62500000000003, 174.65250000000003, 174.68000000000004, 174.70750000000004, 174.73500000000004, 174.76250000000002, 174.79000000000002, 174.81750000000002, 174.84500000000003, 174.87250000000003, 174.90000000000003, 174.92750000000004, 174.95500000000004, 174.98250000000002, 175.01000000000002, 175.03750000000002, 175.06500000000003, 175.09250000000003, 175.12000000000003, 175.14750000000004, 175.17500000000004, 175.20250000000004, 175.23000000000002, 175.25750000000002, 175.28500000000003, 175.31250000000003, 175.34000000000003, 175.36750000000004, 175.39500000000004, 175.42250000000004, 175.45000000000002, |

| Description | Value                                                                                                                                                                                                                                                                                                                                                                                                                                                                                                                                                                                                                                                                                                                                                                                                                                                                                                                                                                                                                                                                                                                                                                                                                                                                                                                                                                                                                                                                                                                                                                                                                                                                                                                                                                                                                                                                                                                                                                                                                                                                                                                                                                                                                                                                                                                                                                                                                                                                                                                                                                                                                                                                                                                                                                                                                                                                                                                                                                                           |
|-------------|-------------------------------------------------------------------------------------------------------------------------------------------------------------------------------------------------------------------------------------------------------------------------------------------------------------------------------------------------------------------------------------------------------------------------------------------------------------------------------------------------------------------------------------------------------------------------------------------------------------------------------------------------------------------------------------------------------------------------------------------------------------------------------------------------------------------------------------------------------------------------------------------------------------------------------------------------------------------------------------------------------------------------------------------------------------------------------------------------------------------------------------------------------------------------------------------------------------------------------------------------------------------------------------------------------------------------------------------------------------------------------------------------------------------------------------------------------------------------------------------------------------------------------------------------------------------------------------------------------------------------------------------------------------------------------------------------------------------------------------------------------------------------------------------------------------------------------------------------------------------------------------------------------------------------------------------------------------------------------------------------------------------------------------------------------------------------------------------------------------------------------------------------------------------------------------------------------------------------------------------------------------------------------------------------------------------------------------------------------------------------------------------------------------------------------------------------------------------------------------------------------------------------------------------------------------------------------------------------------------------------------------------------------------------------------------------------------------------------------------------------------------------------------------------------------------------------------------------------------------------------------------------------------------------------------------------------------------------------------------------------|
|             | 175.47750000000002, 175.50500000000002, 175.53250000000003, 175.56000000000003, 175.58750000000003, 175.61500000000004, 175.64250000000004, 175.67000000000002, 175.69750000000002, 175.72500000000002, 175.75250000000003, 175.78000000000003, 175.80750000000003, 175.83500000000004, 175.86250000000004, 175.89000000000004, 175.91750000000002, 175.94500000000002, 175.97250000000003, 176.00000000000003, 176.02750000000003, 176.05500000000004, 176.08250000000004, 176.11000000000004, 176.13750000000002, 176.16500000000002, 176.19250000000002, 176.22000000000003, 176.24750000000003, 176.27500000000003, 176.30250000000004, 176.33000000000004, 176.35750000000002, 176.38500000000002, 176.41250000000002, 176.44000000000003, 176.46750000000003, 176.49500000000003, 176.52250000000004, 176.55000000000004, 176.57750000000004, 176.60500000000002, 176.63250000000002, 176.66000000000003, 176.68750000000003, 176.71500000000003, 176.74250000000004, 176.77000000000004, 176.79750000000004, 176.82500000000002, 176.85250000000002, 176.88000000000002, 176.90750000000003, 176.93500000000003, 176.96250000000003, 176.99000000000004, 177.01750000000004, 177.04500000000002, 177.07250000000002, 177.10000000000002, 177.12750000000003, 177.15500000000003, 177.18250000000003, 177.21000000000004, 177.23750000000004, 177.26500000000004, 177.29250000000002, 177.32000000000002, 177.34750000000003, 177.37500000000003, 177.40250000000003, 177.43000000000004, 177.45750000000004, 177.48500000000004, 177.51250000000002, 177.54000000000002, 177.56750000000002, 177.59500000000003, 177.62250000000003, 177.65000000000003, 177.67750000000004, 177.70500000000004, 177.73250000000002, 177.76000000000002, 177.78750000000002, 177.81500000000003, 177.84250000000003, 177.87000000000003, 177.89750000000004, 177.92500000000004, 177.95250000000004, 177.98000000000002, 178.00750000000002, 178.03500000000003, 178.06250000000003, 178.09000000000003, 178.11750000000004, 178.14500000000004, 178.17250000000004, 178.20000000000002, 178.22750000000002, 178.25500000000002, 178.28250000000003, 178.31000000000003, 178.33750000000003, 178.36500000000004, 178.39250000000004, 178.42000000000002, 178.44750000000002, 178.47500000000002, 178.50250000000003, 178.53000000000003, 178.55750000000003, 178.58500000000004, 178.61250000000004, 178.64000000000004, 178.66750000000002, 178.69500000000002, 178.72250000000003, 178.75000000000003, 178.77750000000003, 178.80500000000004, 178.83250000000004, 178.86000000000004, 178.88750000000002, 178.91500000000002, 178.94250000000002, 178.97000000000003, 178.99750000000003, 179.02500000000003, 179.05250000000004, 179.08000000000004, 179.10750000000002, 179.13500000000002, 179.16250000000002, 179.19000000000003, 179.21750000000003, 179.24500000000003, 179.27250000000004, 179.30000000000004, 179.32750000000004, 179.35500000000002, 179.38250000000002, 179.41000000000003, |

| Description | Value                                                       |
|-------------|-------------------------------------------------------------|
|             | 179.43750000000003, 179.46500000000003, 179.49250000000004, |
|             | 179.52000000000004, 179.54750000000004, 179.57500000000002, |
|             | 179.60250000000002, 179.63000000000002, 179.65750000000003, |
|             | 179.68500000000003, 179.71250000000003, 179.74000000000004, |
|             | 179.76750000000004, 179.79500000000002, 179.82250000000002, |
|             | 179.85000000000002, 179.87750000000003, 179.90500000000003, |
|             | 179.93250000000003, 179.96000000000004, 179.98750000000004, |
|             | 180.01500000000004, 180.04250000000002, 180.07000000000002, |
|             | 180.09750000000003, 180.12500000000003, 180.15250000000003, |
|             | 180.18000000000004, 180.20750000000004, 180.23500000000004, |
|             | 180.26250000000005, 180.29000000000002, 180.31750000000002, |
|             | 180.34500000000003, 180.37250000000003, 180.40000000000003, |
|             | 180.42750000000004, 180.45500000000004, 180.48250000000002, |
|             | 180.51000000000002, 180.53750000000002, 180.56500000000003, |
|             | 180.59250000000003, 180.62000000000003, 180.64750000000004, |
|             | 180.67500000000004, 180.70250000000004, 180.73000000000002, |
|             | 180.75750000000002, 180.78500000000003, 180.81250000000003, |
|             | 180.84000000000003, 180.86750000000004, 180.89500000000004, |
|             | 180.92250000000004, 180.95000000000005, 180.97750000000002, |
|             | 181.00500000000002, 181.03250000000003, 181.06000000000003, |
|             | 181.08750000000003, 181.11500000000004, 181.14250000000004, |
|             | 181.17000000000002, 181.19750000000002, 181.22500000000002, |
|             | 181.25250000000003, 181.28000000000003, 181.30750000000003, |
|             | 181.33500000000004, 181.36250000000004, 181.39000000000004, |
|             | 181.41750000000002, 181.44500000000002, 181.47250000000003, |
|             | 181.50000000000003, 181.52750000000003, 181.55500000000004, |
|             | 181.58250000000004, 181.61000000000004, 181.63750000000005, |
|             | 181.66500000000002, 181.69250000000002, 181.72000000000003, |
|             | 181.74750000000003, 181.77500000000003, 181.80250000000004, |
|             | 181.83000000000004, 181.85750000000002, 181.88500000000002, |
|             | 181.91250000000002, 181.94000000000003, 181.96750000000003, |
|             | 181.99500000000003, 182.02250000000004, 182.05000000000004, |
|             | 182.07750000000004, 182.10500000000002, 182.13250000000002, |
|             | 182.16000000000003, 182.18750000000003, 182.21500000000003, |
|             | 182.24250000000004, 182.27000000000004, 182.29750000000004, |
|             | 182.32500000000005, 182.35250000000002, 182.38000000000002, |
|             | 182.40750000000003, 182.43500000000003, 182.46250000000003, |
|             | 182.49000000000004, 182.51750000000004, 182.54500000000002, |
|             | 182.57250000000002, 182.60000000000002, 182.62750000000003, |
|             | 182.65500000000003, 182.68250000000003, 182.71000000000004, |
|             | 182.73750000000004, 182.76500000000004, 182.79250000000002, |
|             | 182.82000000000002, 182.84750000000003, 182.87500000000003, |
|             | 182.90250000000003, 182.93000000000004, 182.95750000000004, |
|             | 182.98500000000004, 183.01250000000005, 183.04000000000002, |
|             | 183.06750000000002, 183.09500000000003, 183.12250000000003, |
|             | 183.15000000000003, 183.17750000000004, 183.20500000000004, |
|             | 183.23250000000002, 183.26000000000002, 183.28750000000002, |
|             | 183.31500000000003, 183.34250000000003, 183.37000000000003, |

| Description | Value                                                                                                                                                                                                                                                                                                                                                                                                                                                                                                                                                                                                                                                                                                                                                                                                                                                                                                                                                                                                                                                                                                                                                                                                                                                                                                                                                                                                                                                                                                                                                                                                                                                                                                                                                                                                                                                                                                                                                                                                                                                                                                                                                                                                                                                                                                                                                                                                                                                                                                                                                                                                                                                                                                                                                                                                                                                                                                                                                                                           |
|-------------|-------------------------------------------------------------------------------------------------------------------------------------------------------------------------------------------------------------------------------------------------------------------------------------------------------------------------------------------------------------------------------------------------------------------------------------------------------------------------------------------------------------------------------------------------------------------------------------------------------------------------------------------------------------------------------------------------------------------------------------------------------------------------------------------------------------------------------------------------------------------------------------------------------------------------------------------------------------------------------------------------------------------------------------------------------------------------------------------------------------------------------------------------------------------------------------------------------------------------------------------------------------------------------------------------------------------------------------------------------------------------------------------------------------------------------------------------------------------------------------------------------------------------------------------------------------------------------------------------------------------------------------------------------------------------------------------------------------------------------------------------------------------------------------------------------------------------------------------------------------------------------------------------------------------------------------------------------------------------------------------------------------------------------------------------------------------------------------------------------------------------------------------------------------------------------------------------------------------------------------------------------------------------------------------------------------------------------------------------------------------------------------------------------------------------------------------------------------------------------------------------------------------------------------------------------------------------------------------------------------------------------------------------------------------------------------------------------------------------------------------------------------------------------------------------------------------------------------------------------------------------------------------------------------------------------------------------------------------------------------------------|
|             | 183.39750000000004, 183.42500000000004, 183.45250000000004, 183.48000000000002, 183.50750000000002, 183.53500000000003, 183.56250000000003, 183.59000000000003, 183.61750000000004, 183.64500000000004, 183.67250000000004, 183.70000000000005, 183.72750000000002, 183.75500000000002, 183.78250000000003, 183.81000000000003, 183.83750000000003, 183.86500000000004, 183.89250000000004, 183.92000000000002, 183.94750000000002, 183.97500000000002, 184.00250000000003, 184.03000000000003, 184.05750000000003, 184.08500000000004, 184.11250000000004, 184.14000000000004, 184.16750000000002, 184.19500000000002, 184.22250000000003, 184.25000000000003, 184.27750000000003, 184.30500000000004, 184.33250000000004, 184.36000000000004, 184.38750000000005, 184.41500000000002, 184.44250000000002, 184.47000000000003, 184.49750000000003, 184.52500000000003, 184.55250000000004, 184.58000000000004, 184.60750000000002, 184.63500000000002, 184.66250000000002, 184.69000000000003, 184.71750000000003, 184.74500000000003, 184.77250000000004, 184.80000000000004, 184.82750000000004, 184.85500000000002, 184.88250000000002, 184.91000000000003, 184.93750000000003, 184.96500000000003, 184.99250000000004, 185.02000000000004, 185.04750000000004, 185.07500000000005, 185.10250000000002, 185.13000000000002, 185.15750000000003, 185.18500000000003, 185.21250000000003, 185.24000000000004, 185.26750000000004, 185.29500000000002, 185.32250000000002, 185.35000000000002, 185.37750000000003, 185.40500000000003, 185.43250000000003, 185.46000000000004, 185.48750000000004, 185.51500000000004, 185.54250000000002, 185.57000000000002, 185.59750000000003, 185.62500000000003, 185.65250000000003, 185.68000000000004, 185.70750000000004, 185.73500000000004, 185.76250000000005, 185.79000000000002, 185.81750000000002, 185.84500000000003, 185.87250000000003, 185.90000000000003, 185.92750000000004, 185.95500000000004, 185.98250000000002, 186.01000000000002, 186.03750000000002, 186.06500000000003, 186.09250000000003, 186.12000000000003, 186.14750000000004, 186.17500000000004, 186.20250000000004, 186.23000000000002, 186.25750000000002, 186.28500000000003, 186.31250000000003, 186.34000000000003, 186.36750000000004, 186.39500000000004, 186.42250000000004, 186.45000000000005, 186.47750000000002, 186.50500000000002, 186.53250000000003, 186.56000000000003, 186.58750000000003, 186.61500000000004, 186.64250000000004, 186.67000000000002, 186.69750000000002, 186.72500000000002, 186.75250000000003, 186.78000000000003, 186.80750000000003, 186.83500000000004, 186.86250000000004, 186.89000000000004, 186.91750000000002, 186.94500000000002, 186.97250000000003, 187.00000000000003, 187.02750000000003, 187.05500000000004, 187.08250000000004, 187.11000000000004, 187.13750000000005, 187.16500000000002, 187.19250000000002, 187.22000000000003, 187.24750000000003, 187.27500000000003, 187.30250000000004, 187.33000000000004, |

| Description | Value                                                       |
|-------------|-------------------------------------------------------------|
|             | 187.35750000000002, 187.38500000000002, 187.41250000000002, |
|             | 187.44000000000003, 187.46750000000003, 187.49500000000003, |
|             | 187.52250000000004, 187.55000000000004, 187.57750000000004, |
|             | 187.60500000000002, 187.63250000000002, 187.66000000000003, |
|             | 187.68750000000003, 187.71500000000003, 187.74250000000004, |
|             | 187.77000000000004, 187.79750000000004, 187.82500000000005, |
|             | 187.85250000000002, 187.88000000000002, 187.90750000000003, |
|             | 187.93500000000003, 187.96250000000003, 187.99000000000004, |
|             | 188.01750000000004, 188.04500000000002, 188.07250000000002, |
|             | 188.10000000000002, 188.12750000000003, 188.15500000000003, |
|             | 188.18250000000003, 188.21000000000004, 188.23750000000004, |
|             | 188.26500000000004, 188.29250000000002, 188.32000000000002, |
|             | 188.34750000000003, 188.37500000000003, 188.40250000000003, |
|             | 188.43000000000004, 188.45750000000004, 188.48500000000004, |
|             | 188.51250000000005, 188.54000000000002, 188.56750000000002, |
|             | 188.59500000000003, 188.62250000000003, 188.65000000000003, |
|             | 188.67750000000004, 188.70500000000004, 188.73250000000002, |
|             | 188.76000000000002, 188.78750000000002, 188.81500000000003, |
|             | 188.84250000000003, 188.87000000000003, 188.89750000000004, |
|             | 188.92500000000004, 188.95250000000004, 188.98000000000002, |
|             | 189.00750000000002, 189.03500000000003, 189.06250000000003, |
|             | 189.09000000000003, 189.11750000000004, 189.14500000000004, |
|             | 189.17250000000004, 189.20000000000005, 189.22750000000002, |
|             | 189.25500000000002, 189.28250000000003, 189.31000000000003, |
|             | 189.33750000000003, 189.36500000000004, 189.39250000000004, |
|             | 189.42000000000002, 189.44750000000002, 189.47500000000002, |
|             | 189.50250000000003, 189.53000000000003, 189.55750000000003, |
|             | 189.58500000000004, 189.61250000000004, 189.64000000000004, |
|             | 189.66750000000002, 189.69500000000002, 189.72250000000003, |
|             | 189.75000000000003, 189.77750000000003, 189.80500000000004, |
|             | 189.83250000000004, 189.86000000000004, 189.88750000000005, |
|             | 189.91500000000002, 189.94250000000002, 189.97000000000003, |
|             | 189.99750000000003, 190.02500000000003, 190.05250000000004, |
|             | 190.08000000000004, 190.10750000000002, 190.13500000000002, |
|             | 190.16250000000002, 190.19000000000003, 190.21750000000003, |
|             | 190.24500000000003, 190.27250000000004, 190.30000000000004, |
|             | 190.32750000000004, 190.35500000000002, 190.38250000000002, |
|             | 190.41000000000003, 190.43750000000003, 190.46500000000003, |
|             | 190.49250000000004, 190.52000000000004, 190.54750000000004, |
|             | 190.57500000000005, 190.60250000000002, 190.63000000000002, |
|             | 190.65750000000003, 190.68500000000003, 190.71250000000003, |
|             | 190.74000000000004, 190.76750000000004, 190.79500000000002, |
|             | 190.82250000000005, 190.85000000000002, 190.87750000000003, |
|             | 190.90500000000003, 190.93250000000003, 190.96000000000004, |
|             | 190.98750000000004, 191.01500000000004, 191.04250000000002, |
|             | 191.07000000000002, 191.09750000000003, 191.12500000000003, |
|             | 191.15250000000003, 191.18000000000004, 191.20750000000004, |
|             | 191.23500000000004, 191.26250000000005, 191.29000000000002, |

| Description | Value                                                                                                                                                                                                                                                                                                                                                                                                                                                                                                                                                                                                                                                                                                                                                                                                                                                                                                                                                                                                                                                                                                                                                                                                                                                                                                                                                                                                                                                                                                                                                                                                                                                                                                                                                                                                                                                                                                                                                                                                                                                                                                                                                                                                                                                                                                                                                                                                                                                                                                                                                                                                                                                                                                                                                                                                                                                                                                                                                                                                                                                                                                                                        |
|-------------|----------------------------------------------------------------------------------------------------------------------------------------------------------------------------------------------------------------------------------------------------------------------------------------------------------------------------------------------------------------------------------------------------------------------------------------------------------------------------------------------------------------------------------------------------------------------------------------------------------------------------------------------------------------------------------------------------------------------------------------------------------------------------------------------------------------------------------------------------------------------------------------------------------------------------------------------------------------------------------------------------------------------------------------------------------------------------------------------------------------------------------------------------------------------------------------------------------------------------------------------------------------------------------------------------------------------------------------------------------------------------------------------------------------------------------------------------------------------------------------------------------------------------------------------------------------------------------------------------------------------------------------------------------------------------------------------------------------------------------------------------------------------------------------------------------------------------------------------------------------------------------------------------------------------------------------------------------------------------------------------------------------------------------------------------------------------------------------------------------------------------------------------------------------------------------------------------------------------------------------------------------------------------------------------------------------------------------------------------------------------------------------------------------------------------------------------------------------------------------------------------------------------------------------------------------------------------------------------------------------------------------------------------------------------------------------------------------------------------------------------------------------------------------------------------------------------------------------------------------------------------------------------------------------------------------------------------------------------------------------------------------------------------------------------------------------------------------------------------------------------------------------------|
|             | 191.31750000000002, 191.34500000000003, 191.37250000000003,<br>191.40000000000003, 191.42750000000004, 191.45500000000004,<br>191.48250000000002, 191.51000000000005, 191.53750000000002,<br>191.56500000000003, 191.59250000000003, 191.62000000000003,<br>191.64750000000004, 191.67500000000004, 191.70250000000004,<br>191.73000000000002, 191.75750000000002, 191.78500000000003,<br>191.81250000000003, 191.84000000000003, 191.86750000000004,<br>191.89500000000004, 191.92250000000004, 191.95000000000005,<br>191.97750000000002, 192.00500000000002, 192.03250000000003,<br>192.06000000000003, 192.08750000000003, 192.11500000000004,<br>192.14250000000004, 192.17000000000004, 192.19750000000005,<br>192.22500000000002, 192.25250000000003, 192.28000000000003,<br>192.30750000000003, 192.33500000000004, 192.36250000000004,<br>192.39000000000004, 192.41750000000002, 192.44500000000002,<br>192.47250000000003, 192.50000000000003, 192.52750000000003,<br>192.55500000000004, 192.58250000000004, 192.61000000000004,<br>192.63750000000005, 192.66500000000002, 192.69250000000002,<br>192.72000000000003, 192.74750000000003, 192.77500000000003,<br>192.80250000000004, 192.83000000000004, 192.85750000000004,<br>192.88500000000005, 192.91250000000002, 192.94000000000003,<br>192.96750000000003, 192.99500000000003, 193.02250000000004,<br>193.05000000000004, 193.07750000000004, 193.10500000000002,<br>193.13250000000002, 193.16000000000003, 193.18750000000003,<br>193.21500000000003, 193.24250000000004, 193.27000000000004,<br>193.29750000000004, 193.32500000000005, 193.35250000000002,<br>193.38000000000002, 193.40750000000003, 193.43500000000003,<br>193.46250000000003, 193.49000000000004, 193.51750000000004,<br>193.54500000000004, 193.57250000000005, 193.60000000000002,<br>193.62750000000003, 193.65500000000003, 193.68250000000003,<br>193.71000000000004, 193.73750000000004, 193.76500000000004,<br>193.79250000000002, 193.82000000000002, 193.84750000000003,<br>193.87500000000003, 193.90250000000003, 193.93000000000004,<br>193.95750000000004, 193.98500000000004, 194.01250000000005,<br>194.04000000000002, 194.06750000000002, 194.09500000000003,<br>194.12250000000003, 194.15000000000003, 194.17750000000004,<br>194.20500000000004, 194.23250000000004, 194.26000000000005,<br>194.28750000000002, 194.31500000000003, 194.34250000000003,<br>194.37000000000003, 194.39750000000004, 194.42500000000004,<br>194.45250000000004, 194.48000000000002, 194.50750000000002,<br>194.53500000000003, 194.56250000000003, 194.59000000000003,<br>194.61750000000004, 194.64500000000004, 194.67250000000004,<br>194.70000000000005, 194.72750000000002, 194.75500000000002,<br>194.78250000000003, 194.81000000000003, 194.83750000000003,<br>194.86500000000004, 194.89250000000004, 194.92000000000004,<br>194.94750000000005, 194.97500000000002, 195.00250000000003,<br>195.03000000000003, 195.05750000000003, 195.08500000000004,<br>195.11250000000004, 195.14000000000004, 195.16750000000002,<br>195.19500000000002, 195.22250000000003, 195.25000000000003, |

| Description | Value                                                                                                                                                                                                                                                                                                                                                                                                                                                                                                                                                                                                                                                                                                                                                                                                                                                                                                                                                                                                                                                                                                                                                                                                                                                                                                                                                                                                                                                                                                                                                                                                                                                                                                                                                                                                                                                                                                                                                                                                                                                                                                                                                                                                                                                                                                                                                                                                                                                                                                                                                                                                                                                                                                                                                                                                                                                                                                                                                                                           |
|-------------|-------------------------------------------------------------------------------------------------------------------------------------------------------------------------------------------------------------------------------------------------------------------------------------------------------------------------------------------------------------------------------------------------------------------------------------------------------------------------------------------------------------------------------------------------------------------------------------------------------------------------------------------------------------------------------------------------------------------------------------------------------------------------------------------------------------------------------------------------------------------------------------------------------------------------------------------------------------------------------------------------------------------------------------------------------------------------------------------------------------------------------------------------------------------------------------------------------------------------------------------------------------------------------------------------------------------------------------------------------------------------------------------------------------------------------------------------------------------------------------------------------------------------------------------------------------------------------------------------------------------------------------------------------------------------------------------------------------------------------------------------------------------------------------------------------------------------------------------------------------------------------------------------------------------------------------------------------------------------------------------------------------------------------------------------------------------------------------------------------------------------------------------------------------------------------------------------------------------------------------------------------------------------------------------------------------------------------------------------------------------------------------------------------------------------------------------------------------------------------------------------------------------------------------------------------------------------------------------------------------------------------------------------------------------------------------------------------------------------------------------------------------------------------------------------------------------------------------------------------------------------------------------------------------------------------------------------------------------------------------------------|
|             | 195.27750000000003, 195.30500000000004, 195.33250000000004, 195.36000000000004, 195.38750000000005, 195.41500000000002, 195.44250000000002, 195.47000000000003, 195.49750000000003, 195.52500000000003, 195.55250000000004, 195.58000000000004, 195.60750000000004, 195.63500000000005, 195.66250000000002, 195.69000000000003, 195.71750000000003, 195.74500000000003, 195.77250000000004, 195.80000000000004, 195.82750000000004, 195.85500000000002, 195.88250000000002, 195.91000000000003, 195.93750000000003, 195.96500000000003, 195.99250000000004, 196.02000000000004, 196.04750000000004, 196.07500000000005, 196.10250000000002, 196.13000000000002, 196.15750000000003, 196.18500000000003, 196.21250000000003, 196.24000000000004, 196.26750000000004, 196.29500000000004, 196.32250000000005, 196.35000000000002, 196.37750000000003, 196.40500000000003, 196.43250000000003, 196.46000000000004, 196.48750000000004, 196.51500000000004, 196.54250000000002, 196.57000000000002, 196.59750000000003, 196.62500000000003, 196.65250000000003, 196.68000000000004, 196.70750000000004, 196.73500000000004, 196.76250000000005, 196.79000000000002, 196.81750000000002, 196.84500000000003, 196.87250000000003, 196.90000000000003, 196.92750000000004, 196.95500000000004, 196.98250000000004, 197.01000000000005, 197.03750000000002, 197.06500000000003, 197.09250000000003, 197.12000000000003, 197.14750000000004, 197.17500000000004, 197.20250000000004, 197.23000000000002, 197.25750000000005, 197.28500000000003, 197.31250000000003, 197.34000000000003, 197.36750000000004, 197.39500000000004, 197.42250000000004, 197.45000000000005, 197.47750000000002, 197.50500000000002, 197.53250000000003, 197.56000000000003, 197.58750000000003, 197.61500000000004, 197.64250000000004, 197.67000000000002, 197.69750000000005, 197.72500000000002, 197.75250000000003, 197.78000000000003, 197.80750000000003, 197.83500000000004, 197.86250000000004, 197.89000000000004, 197.91750000000002, 197.94500000000005, 197.97250000000003, 198.00000000000003, 198.02750000000003, 198.05500000000004, 198.08250000000004, 198.11000000000004, 198.13750000000005, 198.16500000000002, 198.19250000000002, 198.22000000000003, 198.24750000000003, 198.27500000000003, 198.30250000000004, 198.33000000000004, 198.35750000000002, 198.38500000000005, 198.41250000000002, 198.44000000000003, 198.46750000000003, 198.49500000000003, 198.52250000000004, 198.55000000000004, 198.57750000000004, 198.60500000000002, 198.63250000000005, 198.66000000000003, 198.68750000000003, 198.71500000000003, 198.74250000000004, 198.77000000000004, 198.79750000000004, 198.82500000000005, 198.85250000000002, 198.88000000000002, 198.90750000000003, 198.93500000000003, 198.96250000000003, 198.99000000000004, 199.01750000000004, 199.04500000000002, 199.07250000000005, 199.10000000000002, 199.12750000000003, 199.15500000000003, 199.18250000000003, 199.21000000000004, |



| Description | Value                                                                                                                                                                                                                                                                                                                                                                                                                                                                                                                                                                                                                                                                                                                                                                                                                                                                                                                                                                                                                                                                                                                                                                                                                                                                                                                                                                                                                                                                                                                                                                                                                                                                                                                                                                                                                                                                                                                                                                                                                                                                                                                                                                                                                                                                                                                                                                                                                                                                                                                                                                                                                                                                                                                                                                                                                                                                                                                                                                                           |
|-------------|-------------------------------------------------------------------------------------------------------------------------------------------------------------------------------------------------------------------------------------------------------------------------------------------------------------------------------------------------------------------------------------------------------------------------------------------------------------------------------------------------------------------------------------------------------------------------------------------------------------------------------------------------------------------------------------------------------------------------------------------------------------------------------------------------------------------------------------------------------------------------------------------------------------------------------------------------------------------------------------------------------------------------------------------------------------------------------------------------------------------------------------------------------------------------------------------------------------------------------------------------------------------------------------------------------------------------------------------------------------------------------------------------------------------------------------------------------------------------------------------------------------------------------------------------------------------------------------------------------------------------------------------------------------------------------------------------------------------------------------------------------------------------------------------------------------------------------------------------------------------------------------------------------------------------------------------------------------------------------------------------------------------------------------------------------------------------------------------------------------------------------------------------------------------------------------------------------------------------------------------------------------------------------------------------------------------------------------------------------------------------------------------------------------------------------------------------------------------------------------------------------------------------------------------------------------------------------------------------------------------------------------------------------------------------------------------------------------------------------------------------------------------------------------------------------------------------------------------------------------------------------------------------------------------------------------------------------------------------------------------------|
|             | 199.23750000000004, 199.26500000000004, 199.29250000000002, 199.32000000000005, 199.34750000000003, 199.37500000000003, 199.40250000000003, 199.43000000000004, 199.45750000000004, 199.48500000000004, 199.51250000000005, 199.54000000000002, 199.56750000000002, 199.59500000000003, 199.62250000000003, 199.65000000000003, 199.67750000000004, 199.70500000000004, 199.73250000000002, 199.76000000000005, 199.78750000000002, 199.81500000000003, 199.84250000000003, 199.87000000000003, 199.89750000000004, 199.92500000000004, 199.95250000000004, 199.98000000000002, 200.00750000000005, 200.03500000000003, 200.06250000000003, 200.09000000000003, 200.11750000000004, 200.14500000000004, 200.17250000000004, 200.20000000000005, 200.22750000000002, 200.25500000000002, 200.28250000000003, 200.31000000000003, 200.33750000000003, 200.36500000000004, 200.39250000000004, 200.42000000000002, 200.44750000000005, 200.47500000000002, 200.50250000000003, 200.53000000000003, 200.55750000000003, 200.58500000000004, 200.61250000000004, 200.64000000000004, 200.66750000000002, 200.69500000000005, 200.72250000000003, 200.75000000000003, 200.77750000000003, 200.80500000000004, 200.83250000000004, 200.86000000000004, 200.88750000000005, 200.91500000000002, 200.94250000000002, 200.97000000000003, 200.99750000000003, 201.02500000000003, 201.05250000000004, 201.08000000000004, 201.10750000000002, 201.13500000000005, 201.16250000000002, 201.19000000000003, 201.21750000000003, 201.24500000000003, 201.27250000000004, 201.30000000000004, 201.32750000000004, 201.35500000000002, 201.38250000000005, 201.41000000000003, 201.43750000000003, 201.46500000000003, 201.49250000000004, 201.52000000000004, 201.54750000000004, 201.57500000000005, 201.60250000000002, 201.63000000000002, 201.65750000000003, 201.68500000000003, 201.71250000000003, 201.74000000000004, 201.76750000000004, 201.79500000000002, 201.82250000000005, 201.85000000000002, 201.87750000000003, 201.90500000000003, 201.93250000000003, 201.96000000000004, 201.98750000000004, 202.01500000000004, 202.04250000000002, 202.07000000000005, 202.09750000000003, 202.12500000000003, 202.15250000000003, 202.18000000000004, 202.20750000000004, 202.23500000000004, 202.26250000000005, 202.29000000000002, 202.31750000000002, 202.34500000000003, 202.37250000000003, 202.40000000000003, 202.42750000000004, 202.45500000000004, 202.48250000000002, 202.51000000000005, 202.53750000000002, 202.56500000000003, 202.59250000000003, 202.62000000000003, 202.64750000000004, 202.67500000000004, 202.70250000000004, 202.73000000000002, 202.75750000000005, 202.78500000000003, 202.81250000000003, 202.84000000000003, 202.86750000000004, 202.89500000000004, 202.92250000000004, 202.95000000000005, 202.97750000000002, 203.00500000000002, 203.03250000000003, 203.06000000000003, 203.08750000000003, 203.11500000000004, 203.14250000000004, 203.17000000000002, |

| Description | Value                                                                                                                                                                                                                                                                                                                                                                                                                                                                                                                                                                                                                                                                                                                                                                                                                                                                                                                                                                                                                                                                                                                                                                                                                                                                                                                                                                                                                                                                                                                                                                                                                                                                                                                                                                                                                                                                                                                                                                                                                                                                                                                                                                                                                                                                                                                                                                                                                                                                                                                                                                                                                                                                                                                                                                                                                                                                                                                                                                                                                                                                                                                                        |
|-------------|----------------------------------------------------------------------------------------------------------------------------------------------------------------------------------------------------------------------------------------------------------------------------------------------------------------------------------------------------------------------------------------------------------------------------------------------------------------------------------------------------------------------------------------------------------------------------------------------------------------------------------------------------------------------------------------------------------------------------------------------------------------------------------------------------------------------------------------------------------------------------------------------------------------------------------------------------------------------------------------------------------------------------------------------------------------------------------------------------------------------------------------------------------------------------------------------------------------------------------------------------------------------------------------------------------------------------------------------------------------------------------------------------------------------------------------------------------------------------------------------------------------------------------------------------------------------------------------------------------------------------------------------------------------------------------------------------------------------------------------------------------------------------------------------------------------------------------------------------------------------------------------------------------------------------------------------------------------------------------------------------------------------------------------------------------------------------------------------------------------------------------------------------------------------------------------------------------------------------------------------------------------------------------------------------------------------------------------------------------------------------------------------------------------------------------------------------------------------------------------------------------------------------------------------------------------------------------------------------------------------------------------------------------------------------------------------------------------------------------------------------------------------------------------------------------------------------------------------------------------------------------------------------------------------------------------------------------------------------------------------------------------------------------------------------------------------------------------------------------------------------------------------|
|             | 203.19750000000005, 203.22500000000002, 203.25250000000003,<br>203.28000000000003, 203.30750000000003, 203.33500000000004,<br>203.36250000000004, 203.39000000000004, 203.41750000000002,<br>203.44500000000005, 203.47250000000003, 203.50000000000003,<br>203.52750000000003, 203.55500000000004, 203.58250000000004,<br>203.61000000000004, 203.63750000000005, 203.66500000000002,<br>203.69250000000002, 203.72000000000003, 203.74750000000003,<br>203.77500000000003, 203.80250000000004, 203.83000000000004,<br>203.85750000000002, 203.88500000000005, 203.91250000000002,<br>203.94000000000003, 203.96750000000003, 203.99500000000003,<br>204.02250000000004, 204.05000000000004, 204.07750000000004,<br>204.10500000000002, 204.13250000000005, 204.16000000000003,<br>204.18750000000003, 204.21500000000003, 204.24250000000004,<br>204.27000000000004, 204.29750000000004, 204.32500000000005,<br>204.35250000000002, 204.38000000000002, 204.40750000000003,<br>204.43500000000003, 204.46250000000003, 204.49000000000004,<br>204.51750000000004, 204.54500000000002, 204.57250000000005,<br>204.60000000000002, 204.62750000000003, 204.65500000000003,<br>204.68250000000003, 204.71000000000004, 204.73750000000004,<br>204.76500000000004, 204.79250000000002, 204.82000000000005,<br>204.84750000000003, 204.87500000000003, 204.90250000000003,<br>204.93000000000004, 204.95750000000004, 204.98500000000004,<br>205.01250000000005, 205.04000000000002, 205.06750000000002,<br>205.09500000000003, 205.12250000000003, 205.15000000000003,<br>205.17750000000004, 205.20500000000004, 205.23250000000004,<br>205.26000000000005, 205.28750000000002, 205.31500000000003,<br>205.34250000000003, 205.37000000000003, 205.39750000000004,<br>205.42500000000004, 205.45250000000004, 205.48000000000002,<br>205.50750000000005, 205.53500000000003, 205.56250000000003,<br>205.59000000000003, 205.61750000000004, 205.64500000000004,<br>205.67250000000004, 205.70000000000005, 205.72750000000002,<br>205.75500000000002, 205.78250000000003, 205.81000000000003,<br>205.83750000000003, 205.86500000000004, 205.89250000000004,<br>205.92000000000004, 205.94750000000005, 205.97500000000002,<br>206.00250000000003, 206.03000000000003, 206.05750000000003,<br>206.08500000000004, 206.11250000000004, 206.14000000000004,<br>206.16750000000002, 206.19500000000005, 206.22250000000003,<br>206.25000000000003, 206.27750000000003, 206.30500000000004,<br>206.33250000000004, 206.36000000000004, 206.38750000000005,<br>206.41500000000002, 206.44250000000002, 206.47000000000003,<br>206.49750000000003, 206.52500000000003, 206.55250000000004,<br>206.58000000000004, 206.60750000000004, 206.63500000000005,<br>206.66250000000002, 206.69000000000003, 206.71750000000003,<br>206.74500000000003, 206.77250000000004, 206.80000000000004,<br>206.82750000000004, 206.85500000000002, 206.88250000000005,<br>206.91000000000003, 206.93750000000003, 206.96500000000003,<br>206.99250000000004, 207.02000000000004, 207.04750000000004,<br>207.07500000000005, 207.10250000000002, 207.13000000000002, |

| Description | Value                                                                                                                                                                                                                                                                                                                                                                                                                                                                                                                                                                                                                                                                                                                                                                                                                                                                                                                                                                                                                                                                                                                                                                                                                                                                                                                                                                                                           |
|-------------|-----------------------------------------------------------------------------------------------------------------------------------------------------------------------------------------------------------------------------------------------------------------------------------------------------------------------------------------------------------------------------------------------------------------------------------------------------------------------------------------------------------------------------------------------------------------------------------------------------------------------------------------------------------------------------------------------------------------------------------------------------------------------------------------------------------------------------------------------------------------------------------------------------------------------------------------------------------------------------------------------------------------------------------------------------------------------------------------------------------------------------------------------------------------------------------------------------------------------------------------------------------------------------------------------------------------------------------------------------------------------------------------------------------------|
|             | 207.15750000000003, 207.18500000000003, 207.21250000000003, 207.24000000000004, 207.26750000000004, 207.29500000000004, 207.32250000000005, 207.35000000000002, 207.37750000000003, 207.40500000000003, 207.43250000000003, 207.46000000000004, 207.48750000000004, 207.51500000000004, 207.54250000000002, 207.57000000000005, 207.59750000000003, 207.62500000000003, 207.65250000000003, 207.68000000000004, 207.70750000000004, 207.73500000000004, 207.76250000000005, 207.79000000000002, 207.81750000000002, 207.84500000000003, 207.87250000000003, 207.90000000000003, 207.92750000000004, 207.95500000000004, 207.98250000000004, 208.01000000000005, 208.03750000000002, 208.06500000000003, 208.09250000000003, 208.12000000000003, 208.14750000000004, 208.17500000000004, 208.20250000000004, 208.23000000000002, 208.25750000000005, 208.28500000000003, 208.31250000000003, 208.34000000000003, 208.36750000000004, 208.39500000000004, 208.42250000000004, 208.45000000000005, 208.47750000000002, 208.50500000000002, 208.53250000000003, 208.56000000000003, 208.58750000000003, 208.61500000000004, 208.64250000000004, 208.67000000000004, 208.69750000000005, 208.72500000000002, 208.75250000000003, 208.78000000000003, 208.80750000000003, 208.83500000000004, 208.86250000000004, 208.89000000000004, 208.91750000000002, 208.94500000000005, 208.97250000000003, 209.00000000000003} |

#### VALUES OF DEPENDENT VARIABLES

| Description | Value                                 |
|-------------|---------------------------------------|
| Settings    | User controlled                       |
| Method      | Solution                              |
| Study       | <a href="#">Study 3 (CV 21 to 30)</a> |
| Settings    | User controlled                       |
| Method      | Solution                              |
| Study       | <a href="#">Study 3 (CV 21 to 30)</a> |

#### MESH

| Feature    | Value |
|------------|-------|
| Geometry 1 | mesh1 |

#### PHYSICS AND VARIABLES SELECTION

| Physics interface                             | Discretization |
|-----------------------------------------------|----------------|
| Transport of Diluted Species in droplet (tds) | physics        |
| Moving Mesh (ale)                             | physics        |

#### MESH SELECTION

| Geometry           | Mesh  |
|--------------------|-------|
| Geometry 1 (geom1) | mesh1 |

## 6.2 SOLVER CONFIGURATIONS

### 6.2.1 Solution 8

#### Compile Equations: Time Dependent (st1)

##### STUDY AND STEP

| Description    | Value                                 |
|----------------|---------------------------------------|
| Use study      | <a href="#">Study 4 (CV 31 to 38)</a> |
| Use study step | <a href="#">Time Dependent</a>        |

##### LOG

```

<---- Compile Equations: Time Dependent in Study 4 (CV 31 to 38)/Solution 8
      (sol8) -----
Started at May 31, 2023 11:06:43 AM.
Geometry shape function: Linear Lagrange
Running on Intel64 Family 6 Model 158 Stepping 10, GenuineIntel.
Using 1 socket with 6 cores in total on LAPTOP-2492RD8I.
Available memory: 32.27 GB.
Time: 2 s.
Physical memory: 2.43 GB
Virtual memory: 2.51 GB
Ended at May 31, 2023 11:06:45 AM.
----- Compile Equations: Time Dependent in Study 4 (CV 31 to 38)/Solution 8
      (sol8) ----->

```

#### Dependent Variables 1 (v1)

##### GENERAL

| Description           | Value                          |
|-----------------------|--------------------------------|
| Defined by study step | <a href="#">Time Dependent</a> |

##### INITIAL VALUES OF VARIABLES SOLVED FOR

| Description | Value                               |
|-------------|-------------------------------------|
| Method      | Solution                            |
| Solution    | <a href="#">Remeshed Solution 3</a> |

##### RESIDUAL SCALING

| Description | Value  |
|-------------|--------|
| Method      | Manual |

##### VALUES OF VARIABLES NOT SOLVED FOR

| Description | Value |
|-------------|-------|
|-------------|-------|

| Description | Value                               |
|-------------|-------------------------------------|
| Method      | Solution                            |
| Solution    | <a href="#">Remeshed Solution 3</a> |

#### INITIAL VALUE CALCULATION CONSTANTS

| Constant name | Initial value source                |
|---------------|-------------------------------------|
| t             | range(30*t_cv,t_tot/nb/200,38*t_cv) |
| timestep      | 0.044[s]                            |

#### LOG

```
<---- Dependent Variables 1 in Study 4 (CV 31 to 38)/Solution 8 (sol8) -----
Started at May 31, 2023 11:06:45 AM.
Initial values of variables solved for: Remeshed Solution 3 (sol7), t=165 s [Last].
Values of variables not solved for: Remeshed Solution 3 (sol7), t=165 s [Last].
Solution time: 0 s.
Physical memory: 2.44 GB
Virtual memory: 2.52 GB
Ended at May 31, 2023 11:06:45 AM.
----- Dependent Variables 1 in Study 4 (CV 31 to 38)/Solution 8 (sol8) ----->
```

#### Concentration (comp1.cOx) (comp1\_cOx)

##### GENERAL

| Description        | Value                              |
|--------------------|------------------------------------|
| Field components   | comp1.cOx                          |
| Internal variables | {comp1.uflux.cOx, comp1.dflux.cOx} |

#### Concentration (comp1.cRed) (comp1\_cRed)

##### GENERAL

| Description        | Value                                |
|--------------------|--------------------------------------|
| Field components   | comp1.cRed                           |
| Internal variables | {comp1.uflux.cRed, comp1.dflux.cRed} |

#### comp1.comp1.RgZg (comp1\_comp1\_RgZg)

##### GENERAL

| Description          | Value    |
|----------------------|----------|
| Field components     | {Rg, Zg} |
| Solve for this field | Off      |

#### Spatial mesh displacement (comp1.spatial.disp) (comp1\_spatial\_disp)

##### GENERAL

| Description      | Value                              |
|------------------|------------------------------------|
| Field components | {comp1.spatial.u, comp1.spatial.w} |

SCALING

| Description | Value                 |
|-------------|-----------------------|
| Method      | Manual                |
| Scale       | 1.3669045321455333E-7 |

Time-Dependent Solver 1 (t1)

GENERAL

| Description           | Value                                                                                                                                                                                                                                                                                                                                                                                                                                                                                                                                                                                                                                                                                                                                                                                                                                                                                                                                                                                                                                                                                                                                                                                                                                                                                                                                                                                                                                                                                                                                                                                                                                                                                                                                                                                                                                                                                                                                                                                                                                                                                                                                                                                                                                                                                                        |
|-----------------------|--------------------------------------------------------------------------------------------------------------------------------------------------------------------------------------------------------------------------------------------------------------------------------------------------------------------------------------------------------------------------------------------------------------------------------------------------------------------------------------------------------------------------------------------------------------------------------------------------------------------------------------------------------------------------------------------------------------------------------------------------------------------------------------------------------------------------------------------------------------------------------------------------------------------------------------------------------------------------------------------------------------------------------------------------------------------------------------------------------------------------------------------------------------------------------------------------------------------------------------------------------------------------------------------------------------------------------------------------------------------------------------------------------------------------------------------------------------------------------------------------------------------------------------------------------------------------------------------------------------------------------------------------------------------------------------------------------------------------------------------------------------------------------------------------------------------------------------------------------------------------------------------------------------------------------------------------------------------------------------------------------------------------------------------------------------------------------------------------------------------------------------------------------------------------------------------------------------------------------------------------------------------------------------------------------------|
| Defined by study step | <a href="#">Time Dependent</a>                                                                                                                                                                                                                                                                                                                                                                                                                                                                                                                                                                                                                                                                                                                                                                                                                                                                                                                                                                                                                                                                                                                                                                                                                                                                                                                                                                                                                                                                                                                                                                                                                                                                                                                                                                                                                                                                                                                                                                                                                                                                                                                                                                                                                                                                               |
| Output times          | {165.00000000000003, 165.02750000000003, 165.05500000000004, 165.08250000000004, 165.11000000000004, 165.13750000000002, 165.16500000000002, 165.19250000000002, 165.22000000000003, 165.24750000000003, 165.27500000000003, 165.30250000000004, 165.33000000000004, 165.35750000000002, 165.38500000000002, 165.41250000000002, 165.44000000000003, 165.46750000000003, 165.49500000000003, 165.52250000000004, 165.55000000000004, 165.57750000000001, 165.60500000000002, 165.63250000000002, 165.66000000000003, 165.68750000000003, 165.71500000000003, 165.74250000000004, 165.77000000000004, 165.79750000000004, 165.82500000000002, 165.85250000000002, 165.88000000000002, 165.90750000000003, 165.93500000000003, 165.96250000000003, 165.99000000000004, 166.01750000000004, 166.04500000000002, 166.07250000000002, 166.10000000000002, 166.12750000000003, 166.15500000000003, 166.18250000000003, 166.21000000000004, 166.23750000000004, 166.26500000000001, 166.29250000000002, 166.32000000000002, 166.34750000000003, 166.37500000000003, 166.40250000000003, 166.43000000000004, 166.45750000000004, 166.48500000000004, 166.51250000000002, 166.54000000000002, 166.56750000000002, 166.59500000000003, 166.62250000000003, 166.65000000000003, 166.67750000000004, 166.70500000000004, 166.73250000000002, 166.76000000000002, 166.78750000000002, 166.81500000000003, 166.84250000000003, 166.87000000000003, 166.89750000000004, 166.92500000000004, 166.95250000000001, 166.98000000000002, 167.00750000000002, 167.03500000000003, 167.06250000000003, 167.09000000000003, 167.11750000000004, 167.14500000000004, 167.17250000000004, 167.20000000000002, 167.22750000000002, 167.25500000000002, 167.28250000000003, 167.31000000000003, 167.33750000000003, 167.36500000000004, 167.39250000000004, 167.42000000000002, 167.44750000000002, 167.47500000000002, 167.50250000000003, 167.53000000000003, 167.55750000000003, 167.58500000000004, 167.61250000000004, 167.64000000000004, 167.66750000000002, 167.69500000000002, 167.72250000000003, 167.75000000000003, 167.77750000000003, 167.80500000000004, 167.83250000000004, 167.86000000000004, 167.88750000000002, 167.91500000000002, 167.94250000000002, 167.97000000000003, 167.99750000000003, 168.02500000000003, |

| Description | Value                                                                                                                                                                                                                                                                                                                                                                                                                                                                                                                                                                                                                                                                                                                                                                                                                                                                                                                                                                                                                                                                                                                                                                                                                                                                                                                                                                                                                                                                                                                                                                                                                                                                                                                                                                                                                                                                                                                                                                                                                                                                                                                                                                                                                                                                                                                                                                                                                                                                                                                                                                                                                                                                                                                                                                                                                                                                                                                                                                                                                                                                                                                                        |
|-------------|----------------------------------------------------------------------------------------------------------------------------------------------------------------------------------------------------------------------------------------------------------------------------------------------------------------------------------------------------------------------------------------------------------------------------------------------------------------------------------------------------------------------------------------------------------------------------------------------------------------------------------------------------------------------------------------------------------------------------------------------------------------------------------------------------------------------------------------------------------------------------------------------------------------------------------------------------------------------------------------------------------------------------------------------------------------------------------------------------------------------------------------------------------------------------------------------------------------------------------------------------------------------------------------------------------------------------------------------------------------------------------------------------------------------------------------------------------------------------------------------------------------------------------------------------------------------------------------------------------------------------------------------------------------------------------------------------------------------------------------------------------------------------------------------------------------------------------------------------------------------------------------------------------------------------------------------------------------------------------------------------------------------------------------------------------------------------------------------------------------------------------------------------------------------------------------------------------------------------------------------------------------------------------------------------------------------------------------------------------------------------------------------------------------------------------------------------------------------------------------------------------------------------------------------------------------------------------------------------------------------------------------------------------------------------------------------------------------------------------------------------------------------------------------------------------------------------------------------------------------------------------------------------------------------------------------------------------------------------------------------------------------------------------------------------------------------------------------------------------------------------------------------|
|             | 168.05250000000004, 168.08000000000004, 168.10750000000002,<br>168.13500000000002, 168.16250000000002, 168.19000000000003,<br>168.21750000000003, 168.24500000000003, 168.27250000000004,<br>168.30000000000004, 168.32750000000004, 168.35500000000002,<br>168.38250000000002, 168.41000000000003, 168.43750000000003,<br>168.46500000000003, 168.49250000000004, 168.52000000000004,<br>168.54750000000004, 168.57500000000002, 168.60250000000002,<br>168.63000000000002, 168.65750000000003, 168.68500000000003,<br>168.71250000000003, 168.74000000000004, 168.76750000000004,<br>168.79500000000002, 168.82250000000002, 168.85000000000002,<br>168.87750000000003, 168.90500000000003, 168.93250000000003,<br>168.96000000000004, 168.98750000000004, 169.01500000000004,<br>169.04250000000002, 169.07000000000002, 169.09750000000003,<br>169.12500000000003, 169.15250000000003, 169.18000000000004,<br>169.20750000000004, 169.23500000000004, 169.26250000000002,<br>169.29000000000002, 169.31750000000002, 169.34500000000003,<br>169.37250000000003, 169.40000000000003, 169.42750000000004,<br>169.45500000000004, 169.48250000000002, 169.51000000000002,<br>169.53750000000002, 169.56500000000003, 169.59250000000003,<br>169.62000000000003, 169.64750000000004, 169.67500000000004,<br>169.70250000000004, 169.73000000000002, 169.75750000000002,<br>169.78500000000003, 169.81250000000003, 169.84000000000003,<br>169.86750000000004, 169.89500000000004, 169.92250000000004,<br>169.95000000000002, 169.97750000000002, 170.00500000000002,<br>170.03250000000003, 170.06000000000003, 170.08750000000003,<br>170.11500000000004, 170.14250000000004, 170.17000000000002,<br>170.19750000000002, 170.22500000000002, 170.25250000000003,<br>170.28000000000003, 170.30750000000003, 170.33500000000004,<br>170.36250000000004, 170.39000000000004, 170.41750000000002,<br>170.44500000000002, 170.47250000000003, 170.50000000000003,<br>170.52750000000003, 170.55500000000004, 170.58250000000004,<br>170.61000000000004, 170.63750000000002, 170.66500000000002,<br>170.69250000000002, 170.72000000000003, 170.74750000000003,<br>170.77500000000003, 170.80250000000004, 170.83000000000004,<br>170.85750000000002, 170.88500000000002, 170.91250000000002,<br>170.94000000000003, 170.96750000000003, 170.99500000000003,<br>171.02250000000004, 171.05000000000004, 171.07750000000004,<br>171.10500000000002, 171.13250000000002, 171.16000000000003,<br>171.18750000000003, 171.21500000000003, 171.24250000000004,<br>171.27000000000004, 171.29750000000004, 171.32500000000002,<br>171.35250000000002, 171.38000000000002, 171.40750000000003,<br>171.43500000000003, 171.46250000000003, 171.49000000000004,<br>171.51750000000004, 171.54500000000002, 171.57250000000002,<br>171.60000000000002, 171.62750000000003, 171.65500000000003,<br>171.68250000000003, 171.71000000000004, 171.73750000000004,<br>171.76500000000004, 171.79250000000002, 171.82000000000002,<br>171.84750000000003, 171.87500000000003, 171.90250000000003,<br>171.93000000000004, 171.95750000000004, 171.98500000000004, |

| Description | Value                                                                                                                                                                                                                                                                                                                                                                                                                                                                                                                                                                                                                                                                                                                                                                                                                                                                                                                                                                                                                                                                                                                                                                                                                                                                                                                                                                                                                                                                                                                                                                                                                                                                                                                                                                                                                                                                                                                                                                                                                                                                                                                                                                                                                                                                                                                                                                                                                                                                                                                                                                                                                                                                                                                                                                                                                                                                                                                                                                                           |
|-------------|-------------------------------------------------------------------------------------------------------------------------------------------------------------------------------------------------------------------------------------------------------------------------------------------------------------------------------------------------------------------------------------------------------------------------------------------------------------------------------------------------------------------------------------------------------------------------------------------------------------------------------------------------------------------------------------------------------------------------------------------------------------------------------------------------------------------------------------------------------------------------------------------------------------------------------------------------------------------------------------------------------------------------------------------------------------------------------------------------------------------------------------------------------------------------------------------------------------------------------------------------------------------------------------------------------------------------------------------------------------------------------------------------------------------------------------------------------------------------------------------------------------------------------------------------------------------------------------------------------------------------------------------------------------------------------------------------------------------------------------------------------------------------------------------------------------------------------------------------------------------------------------------------------------------------------------------------------------------------------------------------------------------------------------------------------------------------------------------------------------------------------------------------------------------------------------------------------------------------------------------------------------------------------------------------------------------------------------------------------------------------------------------------------------------------------------------------------------------------------------------------------------------------------------------------------------------------------------------------------------------------------------------------------------------------------------------------------------------------------------------------------------------------------------------------------------------------------------------------------------------------------------------------------------------------------------------------------------------------------------------------|
|             | 172.01250000000002, 172.04000000000002, 172.06750000000002, 172.09500000000003, 172.12250000000003, 172.15000000000003, 172.17750000000004, 172.20500000000004, 172.23250000000002, 172.26000000000002, 172.28750000000002, 172.31500000000003, 172.34250000000003, 172.37000000000003, 172.39750000000004, 172.42500000000004, 172.45250000000004, 172.48000000000002, 172.50750000000002, 172.53500000000003, 172.56250000000003, 172.59000000000003, 172.61750000000004, 172.64500000000004, 172.67250000000004, 172.70000000000002, 172.72750000000002, 172.75500000000002, 172.78250000000003, 172.81000000000003, 172.83750000000003, 172.86500000000004, 172.89250000000004, 172.92000000000002, 172.94750000000002, 172.97500000000002, 173.00250000000003, 173.03000000000003, 173.05750000000003, 173.08500000000004, 173.11250000000004, 173.14000000000004, 173.16750000000002, 173.19500000000002, 173.22250000000003, 173.25000000000003, 173.27750000000003, 173.30500000000004, 173.33250000000004, 173.36000000000004, 173.38750000000002, 173.41500000000002, 173.44250000000002, 173.47000000000003, 173.49750000000003, 173.52500000000003, 173.55250000000004, 173.58000000000004, 173.60750000000002, 173.63500000000002, 173.66250000000002, 173.69000000000003, 173.71750000000003, 173.74500000000003, 173.77250000000004, 173.80000000000004, 173.82750000000004, 173.85500000000002, 173.88250000000002, 173.91000000000003, 173.93750000000003, 173.96500000000003, 173.99250000000004, 174.02000000000004, 174.04750000000004, 174.07500000000002, 174.10250000000002, 174.13000000000002, 174.15750000000003, 174.18500000000003, 174.21250000000003, 174.24000000000004, 174.26750000000004, 174.29500000000002, 174.32250000000002, 174.35000000000002, 174.37750000000003, 174.40500000000003, 174.43250000000003, 174.46000000000004, 174.48750000000004, 174.51500000000004, 174.54250000000002, 174.57000000000002, 174.59750000000003, 174.62500000000003, 174.65250000000003, 174.68000000000004, 174.70750000000004, 174.73500000000004, 174.76250000000002, 174.79000000000002, 174.81750000000002, 174.84500000000003, 174.87250000000003, 174.90000000000003, 174.92750000000004, 174.95500000000004, 174.98250000000002, 175.01000000000002, 175.03750000000002, 175.06500000000003, 175.09250000000003, 175.12000000000003, 175.14750000000004, 175.17500000000004, 175.20250000000004, 175.23000000000002, 175.25750000000002, 175.28500000000003, 175.31250000000003, 175.34000000000003, 175.36750000000004, 175.39500000000004, 175.42250000000004, 175.45000000000002, 175.47750000000002, 175.50500000000002, 175.53250000000003, 175.56000000000003, 175.58750000000003, 175.61500000000004, 175.64250000000004, 175.67000000000002, 175.69750000000002, 175.72500000000002, 175.75250000000003, 175.78000000000003, 175.80750000000003, 175.83500000000004, 175.86250000000004, 175.89000000000004, 175.91750000000002, 175.94500000000002, |



| Description | Value                                                                                                                                                                                                                                                                                                                                                                                                                                                                                                                                                                                                                                                                                                                                                                                                                                                                                                                                                                                                                                                                                                                                                                                                                                                                                                                                                                                                                                                                                                                                                                                                                                                                                                                                                                                                                                                                                                                                                                                                                                                                                                                                                                                                                                                                                                                                                                                                                                                                                                                                                                                                                                                                                                                                                                                                                                                                                                                                                                                                                                                                                                                                        |
|-------------|----------------------------------------------------------------------------------------------------------------------------------------------------------------------------------------------------------------------------------------------------------------------------------------------------------------------------------------------------------------------------------------------------------------------------------------------------------------------------------------------------------------------------------------------------------------------------------------------------------------------------------------------------------------------------------------------------------------------------------------------------------------------------------------------------------------------------------------------------------------------------------------------------------------------------------------------------------------------------------------------------------------------------------------------------------------------------------------------------------------------------------------------------------------------------------------------------------------------------------------------------------------------------------------------------------------------------------------------------------------------------------------------------------------------------------------------------------------------------------------------------------------------------------------------------------------------------------------------------------------------------------------------------------------------------------------------------------------------------------------------------------------------------------------------------------------------------------------------------------------------------------------------------------------------------------------------------------------------------------------------------------------------------------------------------------------------------------------------------------------------------------------------------------------------------------------------------------------------------------------------------------------------------------------------------------------------------------------------------------------------------------------------------------------------------------------------------------------------------------------------------------------------------------------------------------------------------------------------------------------------------------------------------------------------------------------------------------------------------------------------------------------------------------------------------------------------------------------------------------------------------------------------------------------------------------------------------------------------------------------------------------------------------------------------------------------------------------------------------------------------------------------------|
|             | 175.97250000000003, 176.00000000000003, 176.02750000000003,<br>176.05500000000004, 176.08250000000004, 176.11000000000004,<br>176.13750000000002, 176.16500000000002, 176.19250000000002,<br>176.22000000000003, 176.24750000000003, 176.27500000000003,<br>176.30250000000004, 176.33000000000004, 176.35750000000002,<br>176.38500000000002, 176.41250000000002, 176.44000000000003,<br>176.46750000000003, 176.49500000000003, 176.52250000000004,<br>176.55000000000004, 176.57750000000004, 176.60500000000002,<br>176.63250000000002, 176.66000000000003, 176.68750000000003,<br>176.71500000000003, 176.74250000000004, 176.77000000000004,<br>176.79750000000004, 176.82500000000002, 176.85250000000002,<br>176.88000000000002, 176.90750000000003, 176.93500000000003,<br>176.96250000000003, 176.99000000000004, 177.01750000000004,<br>177.04500000000002, 177.07250000000002, 177.10000000000002,<br>177.12750000000003, 177.15500000000003, 177.18250000000003,<br>177.21000000000004, 177.23750000000004, 177.26500000000004,<br>177.29250000000002, 177.32000000000002, 177.34750000000003,<br>177.37500000000003, 177.40250000000003, 177.43000000000004,<br>177.45750000000004, 177.48500000000004, 177.51250000000002,<br>177.54000000000002, 177.56750000000002, 177.59500000000003,<br>177.62250000000003, 177.65000000000003, 177.67750000000004,<br>177.70500000000004, 177.73250000000002, 177.76000000000002,<br>177.78750000000002, 177.81500000000003, 177.84250000000003,<br>177.87000000000003, 177.89750000000004, 177.92500000000004,<br>177.95250000000004, 177.98000000000002, 178.00750000000002,<br>178.03500000000003, 178.06250000000003, 178.09000000000003,<br>178.11750000000004, 178.14500000000004, 178.17250000000004,<br>178.20000000000002, 178.22750000000002, 178.25500000000002,<br>178.28250000000003, 178.31000000000003, 178.33750000000003,<br>178.36500000000004, 178.39250000000004, 178.42000000000002,<br>178.44750000000002, 178.47500000000002, 178.50250000000003,<br>178.53000000000003, 178.55750000000003, 178.58500000000004,<br>178.61250000000004, 178.64000000000004, 178.66750000000002,<br>178.69500000000002, 178.72250000000003, 178.75000000000003,<br>178.77750000000003, 178.80500000000004, 178.83250000000004,<br>178.86000000000004, 178.88750000000002, 178.91500000000002,<br>178.94250000000002, 178.97000000000003, 178.99750000000003,<br>179.02500000000003, 179.05250000000004, 179.08000000000004,<br>179.10750000000002, 179.13500000000002, 179.16250000000002,<br>179.19000000000003, 179.21750000000003, 179.24500000000003,<br>179.27250000000004, 179.30000000000004, 179.32750000000004,<br>179.35500000000002, 179.38250000000002, 179.41000000000003,<br>179.43750000000003, 179.46500000000003, 179.49250000000004,<br>179.52000000000004, 179.54750000000004, 179.57500000000002,<br>179.60250000000002, 179.63000000000002, 179.65750000000003,<br>179.68500000000003, 179.71250000000003, 179.74000000000004,<br>179.76750000000004, 179.79500000000002, 179.82250000000002,<br>179.85000000000002, 179.87750000000003, 179.90500000000003, |

| Description | Value                                                                                                                                                                                                                                                                                                                                                                                                                                                                                                                                                                                                                                                                                                                                                                                                                                                                                                                                                                                                                                                                                                                                                                                                                                                                                                                                                                                                                                                                                                                                                                                                                                                                                                                                                                                                                                                                                                                                                                                                                                                                                                                                                                                                                                                                                                                                                                                                                                                                                                                                                                                                                                                                                                                                                                                                                                                                                                                                                                                                                                                                                                                                        |
|-------------|----------------------------------------------------------------------------------------------------------------------------------------------------------------------------------------------------------------------------------------------------------------------------------------------------------------------------------------------------------------------------------------------------------------------------------------------------------------------------------------------------------------------------------------------------------------------------------------------------------------------------------------------------------------------------------------------------------------------------------------------------------------------------------------------------------------------------------------------------------------------------------------------------------------------------------------------------------------------------------------------------------------------------------------------------------------------------------------------------------------------------------------------------------------------------------------------------------------------------------------------------------------------------------------------------------------------------------------------------------------------------------------------------------------------------------------------------------------------------------------------------------------------------------------------------------------------------------------------------------------------------------------------------------------------------------------------------------------------------------------------------------------------------------------------------------------------------------------------------------------------------------------------------------------------------------------------------------------------------------------------------------------------------------------------------------------------------------------------------------------------------------------------------------------------------------------------------------------------------------------------------------------------------------------------------------------------------------------------------------------------------------------------------------------------------------------------------------------------------------------------------------------------------------------------------------------------------------------------------------------------------------------------------------------------------------------------------------------------------------------------------------------------------------------------------------------------------------------------------------------------------------------------------------------------------------------------------------------------------------------------------------------------------------------------------------------------------------------------------------------------------------------------|
|             | 179.93250000000003, 179.96000000000004, 179.98750000000004,<br>180.01500000000004, 180.04250000000002, 180.07000000000002,<br>180.09750000000003, 180.12500000000003, 180.15250000000003,<br>180.18000000000004, 180.20750000000004, 180.23500000000004,<br>180.26250000000005, 180.29000000000002, 180.31750000000002,<br>180.34500000000003, 180.37250000000003, 180.40000000000003,<br>180.42750000000004, 180.45500000000004, 180.48250000000002,<br>180.51000000000002, 180.53750000000002, 180.56500000000003,<br>180.59250000000003, 180.62000000000003, 180.64750000000004,<br>180.67500000000004, 180.70250000000004, 180.73000000000002,<br>180.75750000000002, 180.78500000000003, 180.81250000000003,<br>180.84000000000003, 180.86750000000004, 180.89500000000004,<br>180.92250000000004, 180.95000000000005, 180.97750000000002,<br>181.00500000000002, 181.03250000000003, 181.06000000000003,<br>181.08750000000003, 181.11500000000004, 181.14250000000004,<br>181.17000000000002, 181.19750000000002, 181.22500000000002,<br>181.25250000000003, 181.28000000000003, 181.30750000000003,<br>181.33500000000004, 181.36250000000004, 181.39000000000004,<br>181.41750000000002, 181.44500000000002, 181.47250000000003,<br>181.50000000000003, 181.52750000000003, 181.55500000000004,<br>181.58250000000004, 181.61000000000004, 181.63750000000005,<br>181.66500000000002, 181.69250000000002, 181.72000000000003,<br>181.74750000000003, 181.77500000000003, 181.80250000000004,<br>181.83000000000004, 181.85750000000002, 181.88500000000002,<br>181.91250000000002, 181.94000000000003, 181.96750000000003,<br>181.99500000000003, 182.02250000000004, 182.05000000000004,<br>182.07750000000004, 182.10500000000002, 182.13250000000002,<br>182.16000000000003, 182.18750000000003, 182.21500000000003,<br>182.24250000000004, 182.27000000000004, 182.29750000000004,<br>182.32500000000005, 182.35250000000002, 182.38000000000002,<br>182.40750000000003, 182.43500000000003, 182.46250000000003,<br>182.49000000000004, 182.51750000000004, 182.54500000000002,<br>182.57250000000002, 182.60000000000002, 182.62750000000003,<br>182.65500000000003, 182.68250000000003, 182.71000000000004,<br>182.73750000000004, 182.76500000000004, 182.79250000000002,<br>182.82000000000002, 182.84750000000003, 182.87500000000003,<br>182.90250000000003, 182.93000000000004, 182.95750000000004,<br>182.98500000000004, 183.01250000000005, 183.04000000000002,<br>183.06750000000002, 183.09500000000003, 183.12250000000003,<br>183.15000000000003, 183.17750000000004, 183.20500000000004,<br>183.23250000000002, 183.26000000000002, 183.28750000000002,<br>183.31500000000003, 183.34250000000003, 183.37000000000003,<br>183.39750000000004, 183.42500000000004, 183.45250000000004,<br>183.48000000000002, 183.50750000000002, 183.53500000000003,<br>183.56250000000003, 183.59000000000003, 183.61750000000004,<br>183.64500000000004, 183.67250000000004, 183.70000000000005,<br>183.72750000000002, 183.75500000000002, 183.78250000000003,<br>183.81000000000003, 183.83750000000003, 183.86500000000004, |

| Description | Value                                                                                                                                                                                                                                                                                                                                                                                                                                                                                                                                                                                                                                                                                                                                                                                                                                                                                                                                                                                                                                                                                                                                                                                                                                                                                                                                                                                                                                                                                                                                                                                                                                                                                                                                                                                                                                                                                                                                                                                                                                                                                                                                                                                                                                                                                                                                                                                                                                                                                                                                                                                                                                                                                                                                                                                                                                                                                                                                                                                           |
|-------------|-------------------------------------------------------------------------------------------------------------------------------------------------------------------------------------------------------------------------------------------------------------------------------------------------------------------------------------------------------------------------------------------------------------------------------------------------------------------------------------------------------------------------------------------------------------------------------------------------------------------------------------------------------------------------------------------------------------------------------------------------------------------------------------------------------------------------------------------------------------------------------------------------------------------------------------------------------------------------------------------------------------------------------------------------------------------------------------------------------------------------------------------------------------------------------------------------------------------------------------------------------------------------------------------------------------------------------------------------------------------------------------------------------------------------------------------------------------------------------------------------------------------------------------------------------------------------------------------------------------------------------------------------------------------------------------------------------------------------------------------------------------------------------------------------------------------------------------------------------------------------------------------------------------------------------------------------------------------------------------------------------------------------------------------------------------------------------------------------------------------------------------------------------------------------------------------------------------------------------------------------------------------------------------------------------------------------------------------------------------------------------------------------------------------------------------------------------------------------------------------------------------------------------------------------------------------------------------------------------------------------------------------------------------------------------------------------------------------------------------------------------------------------------------------------------------------------------------------------------------------------------------------------------------------------------------------------------------------------------------------------|
|             | 183.89250000000004, 183.92000000000002, 183.94750000000002, 183.97500000000002, 184.00250000000003, 184.03000000000003, 184.05750000000003, 184.08500000000004, 184.11250000000004, 184.14000000000004, 184.16750000000002, 184.19500000000002, 184.22250000000003, 184.25000000000003, 184.27750000000003, 184.30500000000004, 184.33250000000004, 184.36000000000004, 184.38750000000005, 184.41500000000002, 184.44250000000002, 184.47000000000003, 184.49750000000003, 184.52500000000003, 184.55250000000004, 184.58000000000004, 184.60750000000002, 184.63500000000002, 184.66250000000002, 184.69000000000003, 184.71750000000003, 184.74500000000003, 184.77250000000004, 184.80000000000004, 184.82750000000004, 184.85500000000002, 184.88250000000002, 184.91000000000003, 184.93750000000003, 184.96500000000003, 184.99250000000004, 185.02000000000004, 185.04750000000004, 185.07500000000005, 185.10250000000002, 185.13000000000002, 185.15750000000003, 185.18500000000003, 185.21250000000003, 185.24000000000004, 185.26750000000004, 185.29500000000002, 185.32250000000002, 185.35000000000002, 185.37750000000003, 185.40500000000003, 185.43250000000003, 185.46000000000004, 185.48750000000004, 185.51500000000004, 185.54250000000002, 185.57000000000002, 185.59750000000003, 185.62500000000003, 185.65250000000003, 185.68000000000004, 185.70750000000004, 185.73500000000004, 185.76250000000005, 185.79000000000002, 185.81750000000002, 185.84500000000003, 185.87250000000003, 185.90000000000003, 185.92750000000004, 185.95500000000004, 185.98250000000002, 186.01000000000002, 186.03750000000002, 186.06500000000003, 186.09250000000003, 186.12000000000003, 186.14750000000004, 186.17500000000004, 186.20250000000004, 186.23000000000002, 186.25750000000002, 186.28500000000003, 186.31250000000003, 186.34000000000003, 186.36750000000004, 186.39500000000004, 186.42250000000004, 186.45000000000005, 186.47750000000002, 186.50500000000002, 186.53250000000003, 186.56000000000003, 186.58750000000003, 186.61500000000004, 186.64250000000004, 186.67000000000002, 186.69750000000002, 186.72500000000002, 186.75250000000003, 186.78000000000003, 186.80750000000003, 186.83500000000004, 186.86250000000004, 186.89000000000004, 186.91750000000002, 186.94500000000002, 186.97250000000003, 187.00000000000003, 187.02750000000003, 187.05500000000004, 187.08250000000004, 187.11000000000004, 187.13750000000005, 187.16500000000002, 187.19250000000002, 187.22000000000003, 187.24750000000003, 187.27500000000003, 187.30250000000004, 187.33000000000004, 187.35750000000002, 187.38500000000002, 187.41250000000002, 187.44000000000003, 187.46750000000003, 187.49500000000003, 187.52250000000004, 187.55000000000004, 187.57750000000004, 187.60500000000002, 187.63250000000002, 187.66000000000003, 187.68750000000003, 187.71500000000003, 187.74250000000004, 187.77000000000004, 187.79750000000004, 187.82500000000005, |

| Description | Value                                                                                                                                                                                                                                                                                                                                                                                                                                                                                                                                                                                                                                                                                                                                                                                                                                                                                                                                                                                                                                                                                                                                                                                                                                                                                                                                                                                                                                                                                                                                                                                                                                                                                                                                                                                                                                                                                                                                                                                                                                                                                                                                                                                                                                                                                                                                                                                                                                                                                                                                                                                                                                                                                                                                                                                                                                                                                                                                                                                                                                                                                                                                        |
|-------------|----------------------------------------------------------------------------------------------------------------------------------------------------------------------------------------------------------------------------------------------------------------------------------------------------------------------------------------------------------------------------------------------------------------------------------------------------------------------------------------------------------------------------------------------------------------------------------------------------------------------------------------------------------------------------------------------------------------------------------------------------------------------------------------------------------------------------------------------------------------------------------------------------------------------------------------------------------------------------------------------------------------------------------------------------------------------------------------------------------------------------------------------------------------------------------------------------------------------------------------------------------------------------------------------------------------------------------------------------------------------------------------------------------------------------------------------------------------------------------------------------------------------------------------------------------------------------------------------------------------------------------------------------------------------------------------------------------------------------------------------------------------------------------------------------------------------------------------------------------------------------------------------------------------------------------------------------------------------------------------------------------------------------------------------------------------------------------------------------------------------------------------------------------------------------------------------------------------------------------------------------------------------------------------------------------------------------------------------------------------------------------------------------------------------------------------------------------------------------------------------------------------------------------------------------------------------------------------------------------------------------------------------------------------------------------------------------------------------------------------------------------------------------------------------------------------------------------------------------------------------------------------------------------------------------------------------------------------------------------------------------------------------------------------------------------------------------------------------------------------------------------------------|
|             | 187.85250000000002, 187.88000000000002, 187.90750000000003,<br>187.93500000000003, 187.96250000000003, 187.99000000000004,<br>188.01750000000004, 188.04500000000002, 188.07250000000002,<br>188.10000000000002, 188.12750000000003, 188.15500000000003,<br>188.18250000000003, 188.21000000000004, 188.23750000000004,<br>188.26500000000004, 188.29250000000002, 188.32000000000002,<br>188.34750000000003, 188.37500000000003, 188.40250000000003,<br>188.43000000000004, 188.45750000000004, 188.48500000000004,<br>188.51250000000005, 188.54000000000002, 188.56750000000002,<br>188.59500000000003, 188.62250000000003, 188.65000000000003,<br>188.67750000000004, 188.70500000000004, 188.73250000000002,<br>188.76000000000002, 188.78750000000002, 188.81500000000003,<br>188.84250000000003, 188.87000000000003, 188.89750000000004,<br>188.92500000000004, 188.95250000000004, 188.98000000000002,<br>189.00750000000002, 189.03500000000003, 189.06250000000003,<br>189.09000000000003, 189.11750000000004, 189.14500000000004,<br>189.17250000000004, 189.20000000000005, 189.22750000000002,<br>189.25500000000002, 189.28250000000003, 189.31000000000003,<br>189.33750000000003, 189.36500000000004, 189.39250000000004,<br>189.42000000000002, 189.44750000000002, 189.47500000000002,<br>189.50250000000003, 189.53000000000003, 189.55750000000003,<br>189.58500000000004, 189.61250000000004, 189.64000000000004,<br>189.66750000000002, 189.69500000000002, 189.72250000000003,<br>189.75000000000003, 189.77750000000003, 189.80500000000004,<br>189.83250000000004, 189.86000000000004, 189.88750000000005,<br>189.91500000000002, 189.94250000000002, 189.97000000000003,<br>189.99750000000003, 190.02500000000003, 190.05250000000004,<br>190.08000000000004, 190.10750000000002, 190.13500000000002,<br>190.16250000000002, 190.19000000000003, 190.21750000000003,<br>190.24500000000003, 190.27250000000004, 190.30000000000004,<br>190.32750000000004, 190.35500000000002, 190.38250000000002,<br>190.41000000000003, 190.43750000000003, 190.46500000000003,<br>190.49250000000004, 190.52000000000004, 190.54750000000004,<br>190.57500000000005, 190.60250000000002, 190.63000000000002,<br>190.65750000000003, 190.68500000000003, 190.71250000000003,<br>190.74000000000004, 190.76750000000004, 190.79500000000002,<br>190.82250000000005, 190.85000000000002, 190.87750000000003,<br>190.90500000000003, 190.93250000000003, 190.96000000000004,<br>190.98750000000004, 191.01500000000004, 191.04250000000002,<br>191.07000000000002, 191.09750000000003, 191.12500000000003,<br>191.15250000000003, 191.18000000000004, 191.20750000000004,<br>191.23500000000004, 191.26250000000005, 191.29000000000002,<br>191.31750000000002, 191.34500000000003, 191.37250000000003,<br>191.40000000000003, 191.42750000000004, 191.45500000000004,<br>191.48250000000002, 191.51000000000005, 191.53750000000002,<br>191.56500000000003, 191.59250000000003, 191.62000000000003,<br>191.64750000000004, 191.67500000000004, 191.70250000000004,<br>191.73000000000002, 191.75750000000002, 191.78500000000003, |

| Description | Value                                                                                                                                                                                                                                                                                                                                                                                                                                                                                                                                                                                                                                                                                                                                                                                                                                                                                                                                                                                                                                                                                                                                                                                                                                                                                                                                                                                                                                                                                                                                                                                                                                                                                                                                                                                                                                                                                                                                                                                                                                                                                                                                                                                                                                                                                                                                                                                                                                                                                                                                                                                                                                                                                                                                                                                                                                                                                                                                                                                                                                                                                                                                        |
|-------------|----------------------------------------------------------------------------------------------------------------------------------------------------------------------------------------------------------------------------------------------------------------------------------------------------------------------------------------------------------------------------------------------------------------------------------------------------------------------------------------------------------------------------------------------------------------------------------------------------------------------------------------------------------------------------------------------------------------------------------------------------------------------------------------------------------------------------------------------------------------------------------------------------------------------------------------------------------------------------------------------------------------------------------------------------------------------------------------------------------------------------------------------------------------------------------------------------------------------------------------------------------------------------------------------------------------------------------------------------------------------------------------------------------------------------------------------------------------------------------------------------------------------------------------------------------------------------------------------------------------------------------------------------------------------------------------------------------------------------------------------------------------------------------------------------------------------------------------------------------------------------------------------------------------------------------------------------------------------------------------------------------------------------------------------------------------------------------------------------------------------------------------------------------------------------------------------------------------------------------------------------------------------------------------------------------------------------------------------------------------------------------------------------------------------------------------------------------------------------------------------------------------------------------------------------------------------------------------------------------------------------------------------------------------------------------------------------------------------------------------------------------------------------------------------------------------------------------------------------------------------------------------------------------------------------------------------------------------------------------------------------------------------------------------------------------------------------------------------------------------------------------------------|
|             | 191.81250000000003, 191.84000000000003, 191.86750000000004,<br>191.89500000000004, 191.92250000000004, 191.95000000000005,<br>191.97750000000002, 192.00500000000002, 192.03250000000003,<br>192.06000000000003, 192.08750000000003, 192.11500000000004,<br>192.14250000000004, 192.17000000000004, 192.19750000000005,<br>192.22500000000002, 192.25250000000003, 192.28000000000003,<br>192.30750000000003, 192.33500000000004, 192.36250000000004,<br>192.39000000000004, 192.41750000000002, 192.44500000000002,<br>192.47250000000003, 192.50000000000003, 192.52750000000003,<br>192.55500000000004, 192.58250000000004, 192.61000000000004,<br>192.63750000000005, 192.66500000000002, 192.69250000000002,<br>192.72000000000003, 192.74750000000003, 192.77500000000003,<br>192.80250000000004, 192.83000000000004, 192.85750000000004,<br>192.88500000000005, 192.91250000000002, 192.94000000000003,<br>192.96750000000003, 192.99500000000003, 193.02250000000004,<br>193.05000000000004, 193.07750000000004, 193.10500000000002,<br>193.13250000000002, 193.16000000000003, 193.18750000000003,<br>193.21500000000003, 193.24250000000004, 193.27000000000004,<br>193.29750000000004, 193.32500000000005, 193.35250000000002,<br>193.38000000000002, 193.40750000000003, 193.43500000000003,<br>193.46250000000003, 193.49000000000004, 193.51750000000004,<br>193.54500000000004, 193.57250000000005, 193.60000000000002,<br>193.62750000000003, 193.65500000000003, 193.68250000000003,<br>193.71000000000004, 193.73750000000004, 193.76500000000004,<br>193.79250000000002, 193.82000000000002, 193.84750000000003,<br>193.87500000000003, 193.90250000000003, 193.93000000000004,<br>193.95750000000004, 193.98500000000004, 194.01250000000005,<br>194.04000000000002, 194.06750000000002, 194.09500000000003,<br>194.12250000000003, 194.15000000000003, 194.17750000000004,<br>194.20500000000004, 194.23250000000004, 194.26000000000005,<br>194.28750000000002, 194.31500000000003, 194.34250000000003,<br>194.37000000000003, 194.39750000000004, 194.42500000000004,<br>194.45250000000004, 194.48000000000002, 194.50750000000002,<br>194.53500000000003, 194.56250000000003, 194.59000000000003,<br>194.61750000000004, 194.64500000000004, 194.67250000000004,<br>194.70000000000005, 194.72750000000002, 194.75500000000002,<br>194.78250000000003, 194.81000000000003, 194.83750000000003,<br>194.86500000000004, 194.89250000000004, 194.92000000000004,<br>194.94750000000005, 194.97500000000002, 195.00250000000003,<br>195.03000000000003, 195.05750000000003, 195.08500000000004,<br>195.11250000000004, 195.14000000000004, 195.16750000000002,<br>195.19500000000002, 195.22250000000003, 195.25000000000003,<br>195.27750000000003, 195.30500000000004, 195.33250000000004,<br>195.36000000000004, 195.38750000000005, 195.41500000000002,<br>195.44250000000002, 195.47000000000003, 195.49750000000003,<br>195.52500000000003, 195.55250000000004, 195.58000000000004,<br>195.60750000000004, 195.63500000000005, 195.66250000000002,<br>195.69000000000003, 195.71750000000003, 195.74500000000003, |

| Description | Value                                                                                                                                                                                                                                                                                                                                                                                                                                                                                                                                                                                                                                                                                                                                                                                                                                                                                                                                                                                                                                                                                                                                                                                                                                                                                                                                                                                                                                                                                                                                                                                                                                                                                                                                                                                                                                                                                                                                                                                                                                                                                                                                                                                                                                                                                                                                                                                                                                                                                                                                                                                                                                                                                                                                                                                                                                                                                                                                                                                                                                                                                                                                        |
|-------------|----------------------------------------------------------------------------------------------------------------------------------------------------------------------------------------------------------------------------------------------------------------------------------------------------------------------------------------------------------------------------------------------------------------------------------------------------------------------------------------------------------------------------------------------------------------------------------------------------------------------------------------------------------------------------------------------------------------------------------------------------------------------------------------------------------------------------------------------------------------------------------------------------------------------------------------------------------------------------------------------------------------------------------------------------------------------------------------------------------------------------------------------------------------------------------------------------------------------------------------------------------------------------------------------------------------------------------------------------------------------------------------------------------------------------------------------------------------------------------------------------------------------------------------------------------------------------------------------------------------------------------------------------------------------------------------------------------------------------------------------------------------------------------------------------------------------------------------------------------------------------------------------------------------------------------------------------------------------------------------------------------------------------------------------------------------------------------------------------------------------------------------------------------------------------------------------------------------------------------------------------------------------------------------------------------------------------------------------------------------------------------------------------------------------------------------------------------------------------------------------------------------------------------------------------------------------------------------------------------------------------------------------------------------------------------------------------------------------------------------------------------------------------------------------------------------------------------------------------------------------------------------------------------------------------------------------------------------------------------------------------------------------------------------------------------------------------------------------------------------------------------------------|
|             | 195.77250000000004, 195.80000000000004, 195.82750000000004,<br>195.85500000000002, 195.88250000000002, 195.91000000000003,<br>195.93750000000003, 195.96500000000003, 195.99250000000004,<br>196.02000000000004, 196.04750000000004, 196.07500000000005,<br>196.10250000000002, 196.13000000000002, 196.15750000000003,<br>196.18500000000003, 196.21250000000003, 196.24000000000004,<br>196.26750000000004, 196.29500000000004, 196.32250000000005,<br>196.35000000000002, 196.37750000000003, 196.40500000000003,<br>196.43250000000003, 196.46000000000004, 196.48750000000004,<br>196.51500000000004, 196.54250000000002, 196.57000000000002,<br>196.59750000000003, 196.62500000000003, 196.65250000000003,<br>196.68000000000004, 196.70750000000004, 196.73500000000004,<br>196.76250000000005, 196.79000000000002, 196.81750000000002,<br>196.84500000000003, 196.87250000000003, 196.90000000000003,<br>196.92750000000004, 196.95500000000004, 196.98250000000004,<br>197.01000000000005, 197.03750000000002, 197.06500000000003,<br>197.09250000000003, 197.12000000000003, 197.14750000000004,<br>197.17500000000004, 197.20250000000004, 197.23000000000002,<br>197.25750000000005, 197.28500000000003, 197.31250000000003,<br>197.34000000000003, 197.36750000000004, 197.39500000000004,<br>197.42250000000004, 197.45000000000005, 197.47750000000002,<br>197.50500000000002, 197.53250000000003, 197.56000000000003,<br>197.58750000000003, 197.61500000000004, 197.64250000000004,<br>197.67000000000002, 197.69750000000005, 197.72500000000002,<br>197.75250000000003, 197.78000000000003, 197.80750000000003,<br>197.83500000000004, 197.86250000000004, 197.89000000000004,<br>197.91750000000002, 197.94500000000005, 197.97250000000003,<br>198.00000000000003, 198.02750000000003, 198.05500000000004,<br>198.08250000000004, 198.11000000000004, 198.13750000000005,<br>198.16500000000002, 198.19250000000002, 198.22000000000003,<br>198.24750000000003, 198.27500000000003, 198.30250000000004,<br>198.33000000000004, 198.35750000000002, 198.38500000000005,<br>198.41250000000002, 198.44000000000003, 198.46750000000003,<br>198.49500000000003, 198.52250000000004, 198.55000000000004,<br>198.57750000000004, 198.60500000000002, 198.63250000000005,<br>198.66000000000003, 198.68750000000003, 198.71500000000003,<br>198.74250000000004, 198.77000000000004, 198.79750000000004,<br>198.82500000000005, 198.85250000000002, 198.88000000000002,<br>198.90750000000003, 198.93500000000003, 198.96250000000003,<br>198.99000000000004, 199.01750000000004, 199.04500000000002,<br>199.07250000000005, 199.10000000000002, 199.12750000000003,<br>199.15500000000003, 199.18250000000003, 199.21000000000004,<br>199.23750000000004, 199.26500000000004, 199.29250000000002,<br>199.32000000000005, 199.34750000000003, 199.37500000000003,<br>199.40250000000003, 199.43000000000004, 199.45750000000004,<br>199.48500000000004, 199.51250000000005, 199.54000000000002,<br>199.56750000000002, 199.59500000000003, 199.62250000000003,<br>199.65000000000003, 199.67750000000004, 199.70500000000004, |

| Description | Value                                                                                                                                                                                                                                                                                                                                                                                                                                                                                                                                                                                                                                                                                                                                                                                                                                                                                                                                                                                                                                                                                                                                                                                                                                                                                                                                                                                                                                                                                                                                                                                                                                                                                                                                                                                                                                                                                                                                                                                                                                                                                                                                                                                                                                                                                                                                                                                                                                                                                                                                                                                                                                                                                                                                                                                                                                                                                                                                                                                                                                                                                                                                        |
|-------------|----------------------------------------------------------------------------------------------------------------------------------------------------------------------------------------------------------------------------------------------------------------------------------------------------------------------------------------------------------------------------------------------------------------------------------------------------------------------------------------------------------------------------------------------------------------------------------------------------------------------------------------------------------------------------------------------------------------------------------------------------------------------------------------------------------------------------------------------------------------------------------------------------------------------------------------------------------------------------------------------------------------------------------------------------------------------------------------------------------------------------------------------------------------------------------------------------------------------------------------------------------------------------------------------------------------------------------------------------------------------------------------------------------------------------------------------------------------------------------------------------------------------------------------------------------------------------------------------------------------------------------------------------------------------------------------------------------------------------------------------------------------------------------------------------------------------------------------------------------------------------------------------------------------------------------------------------------------------------------------------------------------------------------------------------------------------------------------------------------------------------------------------------------------------------------------------------------------------------------------------------------------------------------------------------------------------------------------------------------------------------------------------------------------------------------------------------------------------------------------------------------------------------------------------------------------------------------------------------------------------------------------------------------------------------------------------------------------------------------------------------------------------------------------------------------------------------------------------------------------------------------------------------------------------------------------------------------------------------------------------------------------------------------------------------------------------------------------------------------------------------------------------|
|             | 199.73250000000002, 199.76000000000005, 199.78750000000002,<br>199.81500000000003, 199.84250000000003, 199.87000000000003,<br>199.89750000000004, 199.92500000000004, 199.95250000000004,<br>199.98000000000002, 200.00750000000005, 200.03500000000003,<br>200.06250000000003, 200.09000000000003, 200.11750000000004,<br>200.14500000000004, 200.17250000000004, 200.20000000000005,<br>200.22750000000002, 200.25500000000002, 200.28250000000003,<br>200.31000000000003, 200.33750000000003, 200.36500000000004,<br>200.39250000000004, 200.42000000000002, 200.44750000000005,<br>200.47500000000002, 200.50250000000003, 200.53000000000003,<br>200.55750000000003, 200.58500000000004, 200.61250000000004,<br>200.64000000000004, 200.66750000000002, 200.69500000000005,<br>200.72250000000003, 200.75000000000003, 200.77750000000003,<br>200.80500000000004, 200.83250000000004, 200.86000000000004,<br>200.88750000000005, 200.91500000000002, 200.94250000000002,<br>200.97000000000003, 200.99750000000003, 201.02500000000003,<br>201.05250000000004, 201.08000000000004, 201.10750000000002,<br>201.13500000000005, 201.16250000000002, 201.19000000000003,<br>201.21750000000003, 201.24500000000003, 201.27250000000004,<br>201.30000000000004, 201.32750000000004, 201.35500000000002,<br>201.38250000000005, 201.41000000000003, 201.43750000000003,<br>201.46500000000003, 201.49250000000004, 201.52000000000004,<br>201.54750000000004, 201.57500000000005, 201.60250000000002,<br>201.63000000000002, 201.65750000000003, 201.68500000000003,<br>201.71250000000003, 201.74000000000004, 201.76750000000004,<br>201.79500000000002, 201.82250000000005, 201.85000000000002,<br>201.87750000000003, 201.90500000000003, 201.93250000000003,<br>201.96000000000004, 201.98750000000004, 202.01500000000004,<br>202.04250000000002, 202.07000000000005, 202.09750000000003,<br>202.12500000000003, 202.15250000000003, 202.18000000000004,<br>202.20750000000004, 202.23500000000004, 202.26250000000005,<br>202.29000000000002, 202.31750000000002, 202.34500000000003,<br>202.37250000000003, 202.40000000000003, 202.42750000000004,<br>202.45500000000004, 202.48250000000002, 202.51000000000005,<br>202.53750000000002, 202.56500000000003, 202.59250000000003,<br>202.62000000000003, 202.64750000000004, 202.67500000000004,<br>202.70250000000004, 202.73000000000002, 202.75750000000005,<br>202.78500000000003, 202.81250000000003, 202.84000000000003,<br>202.86750000000004, 202.89500000000004, 202.92250000000004,<br>202.95000000000005, 202.97750000000002, 203.00500000000002,<br>203.03250000000003, 203.06000000000003, 203.08750000000003,<br>203.11500000000004, 203.14250000000004, 203.17000000000002,<br>203.19750000000005, 203.22500000000002, 203.25250000000003,<br>203.28000000000003, 203.30750000000003, 203.33500000000004,<br>203.36250000000004, 203.39000000000004, 203.41750000000002,<br>203.44500000000005, 203.47250000000003, 203.50000000000003,<br>203.52750000000003, 203.55500000000004, 203.58250000000004,<br>203.61000000000004, 203.63750000000005, 203.66500000000002, |

| Description | Value                                                                                                                                                                                                                                                                                                                                                                                                                                                                                                                                                                                                                                                                                                                                                                                                                                                                                                                                                                                                                                                                                                                                                                                                                                                                                                                                                                                                                                                                                                                                                                                                                                                                                                                                                                                                                                                                                                                                                                                                                                                                                                                                                                                                                                                                                                                                                                                                                                                                                                                                                                                                                                                                                                                                                                                                                                                                                                                                                                                                                                                                                                                                        |
|-------------|----------------------------------------------------------------------------------------------------------------------------------------------------------------------------------------------------------------------------------------------------------------------------------------------------------------------------------------------------------------------------------------------------------------------------------------------------------------------------------------------------------------------------------------------------------------------------------------------------------------------------------------------------------------------------------------------------------------------------------------------------------------------------------------------------------------------------------------------------------------------------------------------------------------------------------------------------------------------------------------------------------------------------------------------------------------------------------------------------------------------------------------------------------------------------------------------------------------------------------------------------------------------------------------------------------------------------------------------------------------------------------------------------------------------------------------------------------------------------------------------------------------------------------------------------------------------------------------------------------------------------------------------------------------------------------------------------------------------------------------------------------------------------------------------------------------------------------------------------------------------------------------------------------------------------------------------------------------------------------------------------------------------------------------------------------------------------------------------------------------------------------------------------------------------------------------------------------------------------------------------------------------------------------------------------------------------------------------------------------------------------------------------------------------------------------------------------------------------------------------------------------------------------------------------------------------------------------------------------------------------------------------------------------------------------------------------------------------------------------------------------------------------------------------------------------------------------------------------------------------------------------------------------------------------------------------------------------------------------------------------------------------------------------------------------------------------------------------------------------------------------------------------|
|             | 203.69250000000002, 203.72000000000003, 203.74750000000003,<br>203.77500000000003, 203.80250000000004, 203.83000000000004,<br>203.85750000000002, 203.88500000000005, 203.91250000000002,<br>203.94000000000003, 203.96750000000003, 203.99500000000003,<br>204.02250000000004, 204.05000000000004, 204.07750000000004,<br>204.10500000000002, 204.13250000000005, 204.16000000000003,<br>204.18750000000003, 204.21500000000003, 204.24250000000004,<br>204.27000000000004, 204.29750000000004, 204.32500000000005,<br>204.35250000000002, 204.38000000000002, 204.40750000000003,<br>204.43500000000003, 204.46250000000003, 204.49000000000004,<br>204.51750000000004, 204.54500000000002, 204.57250000000005,<br>204.60000000000002, 204.62750000000003, 204.65500000000003,<br>204.68250000000003, 204.71000000000004, 204.73750000000004,<br>204.76500000000004, 204.79250000000002, 204.82000000000005,<br>204.84750000000003, 204.87500000000003, 204.90250000000003,<br>204.93000000000004, 204.95750000000004, 204.98500000000004,<br>205.01250000000005, 205.04000000000002, 205.06750000000002,<br>205.09500000000003, 205.12250000000003, 205.15000000000003,<br>205.17750000000004, 205.20500000000004, 205.23250000000004,<br>205.26000000000005, 205.28750000000002, 205.31500000000003,<br>205.34250000000003, 205.37000000000003, 205.39750000000004,<br>205.42500000000004, 205.45250000000004, 205.48000000000002,<br>205.50750000000005, 205.53500000000003, 205.56250000000003,<br>205.59000000000003, 205.61750000000004, 205.64500000000004,<br>205.67250000000004, 205.70000000000005, 205.72750000000002,<br>205.75500000000002, 205.78250000000003, 205.81000000000003,<br>205.83750000000003, 205.86500000000004, 205.89250000000004,<br>205.92000000000004, 205.94750000000005, 205.97500000000002,<br>206.00250000000003, 206.03000000000003, 206.05750000000003,<br>206.08500000000004, 206.11250000000004, 206.14000000000004,<br>206.16750000000002, 206.19500000000005, 206.22250000000003,<br>206.25000000000003, 206.27750000000003, 206.30500000000004,<br>206.33250000000004, 206.36000000000004, 206.38750000000005,<br>206.41500000000002, 206.44250000000002, 206.47000000000003,<br>206.49750000000003, 206.52500000000003, 206.55250000000004,<br>206.58000000000004, 206.60750000000004, 206.63500000000005,<br>206.66250000000002, 206.69000000000003, 206.71750000000003,<br>206.74500000000003, 206.77250000000004, 206.80000000000004,<br>206.82750000000004, 206.85500000000002, 206.88250000000005,<br>206.91000000000003, 206.93750000000003, 206.96500000000003,<br>206.99250000000004, 207.02000000000004, 207.04750000000004,<br>207.07500000000005, 207.10250000000002, 207.13000000000002,<br>207.15750000000003, 207.18500000000003, 207.21250000000003,<br>207.24000000000004, 207.26750000000004, 207.29500000000004,<br>207.32250000000005, 207.35000000000002, 207.37750000000003,<br>207.40500000000003, 207.43250000000003, 207.46000000000004,<br>207.48750000000004, 207.51500000000004, 207.54250000000002,<br>207.57000000000005, 207.59750000000003, 207.62500000000003, |



| Description        | Value                                                                                                                                                                                                                                                                                                                                                                                                                                                                                                                                                                                                                                                                                                                                                                                                                                                                                                                                                                                                                                   |
|--------------------|-----------------------------------------------------------------------------------------------------------------------------------------------------------------------------------------------------------------------------------------------------------------------------------------------------------------------------------------------------------------------------------------------------------------------------------------------------------------------------------------------------------------------------------------------------------------------------------------------------------------------------------------------------------------------------------------------------------------------------------------------------------------------------------------------------------------------------------------------------------------------------------------------------------------------------------------------------------------------------------------------------------------------------------------|
|                    | 207.65250000000003, 207.68000000000004, 207.70750000000004, 207.73500000000004, 207.76250000000005, 207.79000000000002, 207.81750000000002, 207.84500000000003, 207.87250000000003, 207.90000000000003, 207.92750000000004, 207.95500000000004, 207.98250000000004, 208.01000000000005, 208.03750000000002, 208.06500000000003, 208.09250000000003, 208.12000000000003, 208.14750000000004, 208.17500000000004, 208.20250000000004, 208.23000000000002, 208.25750000000005, 208.28500000000003, 208.31250000000003, 208.34000000000003, 208.36750000000004, 208.39500000000004, 208.42250000000004, 208.45000000000005, 208.47750000000002, 208.50500000000002, 208.53250000000003, 208.56000000000003, 208.58750000000003, 208.61500000000004, 208.64250000000004, 208.67000000000004, 208.69750000000005, 208.72500000000002, 208.75250000000003, 208.78000000000003, 208.80750000000003, 208.83500000000004, 208.86250000000004, 208.89000000000004, 208.91750000000002, 208.94500000000005, 208.97250000000003, 209.00000000000003} |
| Relative tolerance | 0.005                                                                                                                                                                                                                                                                                                                                                                                                                                                                                                                                                                                                                                                                                                                                                                                                                                                                                                                                                                                                                                   |

#### TIME STEPPING

| Description          | Value |
|----------------------|-------|
| Maximum BDF order    | 2     |
| Nonlinear controller | On    |

#### LOG

|     |        |          |    |    |    |   |   |   |         |         |
|-----|--------|----------|----|----|----|---|---|---|---------|---------|
| 368 | 196.76 | 0.051309 | 58 | 30 | 58 | 2 | 2 | 0 | 6.8e-14 | 5.1e-15 |
| -   | 196.79 | - out    |    |    |    |   |   |   |         |         |
| 369 | 196.81 | 0.051309 | 60 | 31 | 60 | 2 | 2 | 0 | 1.5e-14 | 5.7e-15 |
| -   | 196.82 | - out    |    |    |    |   |   |   |         |         |
| -   | 196.85 | - out    |    |    |    |   |   |   |         |         |
| 370 | 196.87 | 0.051309 | 62 | 32 | 62 | 2 | 2 | 0 | 8.9e-14 | 5.3e-15 |
| -   | 196.87 | - out    |    |    |    |   |   |   |         |         |
| -   | 196.9  | - out    |    |    |    |   |   |   |         |         |
| -   | 196.93 | - out    |    |    |    |   |   |   |         |         |
| -   | 196.96 | - out    |    |    |    |   |   |   |         |         |
| 371 | 196.97 | 0.10262  | 64 | 33 | 64 | 2 | 2 | 0 | 7.5e-14 | 3.9e-15 |
| -   | 196.98 | - out    |    |    |    |   |   |   |         |         |
| -   | 197.01 | - out    |    |    |    |   |   |   |         |         |
| -   | 197.04 | - out    |    |    |    |   |   |   |         |         |
| 372 | 197.05 | 0.08619  | 66 | 34 | 66 | 2 | 2 | 0 | 1.5e-13 | 4.6e-15 |
| -   | 197.07 | - out    |    |    |    |   |   |   |         |         |
| -   | 197.09 | - out    |    |    |    |   |   |   |         |         |
| -   | 197.12 | - out    |    |    |    |   |   |   |         |         |
| 373 | 197.13 | 0.077571 | 68 | 35 | 68 | 2 | 2 | 0 | 2.7e-13 | 3.6e-15 |
| -   | 197.15 | - out    |    |    |    |   |   |   |         |         |
| -   | 197.18 | - out    |    |    |    |   |   |   |         |         |
| -   | 197.2  | - out    |    |    |    |   |   |   |         |         |
| 374 | 197.21 | 0.077571 | 70 | 36 | 70 | 2 | 2 | 0 | 8.8e-14 | 4.4e-15 |
| -   | 197.23 | - out    |    |    |    |   |   |   |         |         |
| -   | 197.26 | - out    |    |    |    |   |   |   |         |         |
| -   | 197.29 | - out    |    |    |    |   |   |   |         |         |
| 375 | 197.29 | 0.077571 | 72 | 37 | 72 | 2 | 2 | 0 | 4.1e-13 | 2.9e-15 |
| -   | 197.31 | - out    |    |    |    |   |   |   |         |         |
| -   | 197.34 | - out    |    |    |    |   |   |   |         |         |
| 376 | 197.36 | 0.077571 | 74 | 38 | 74 | 2 | 2 | 0 | 5.1e-13 | 4.9e-15 |
| -   | 197.37 | - out    |    |    |    |   |   |   |         |         |
| -   | 197.4  | - out    |    |    |    |   |   |   |         |         |
| -   | 197.42 | - out    |    |    |    |   |   |   |         |         |
| 377 | 197.44 | 0.077571 | 76 | 39 | 76 | 2 | 2 | 0 | 2.1e-13 | 3.3e-15 |
| -   | 197.45 | - out    |    |    |    |   |   |   |         |         |
| -   | 197.48 | - out    |    |    |    |   |   |   |         |         |
| -   | 197.51 | - out    |    |    |    |   |   |   |         |         |
| 378 | 197.52 | 0.077571 | 78 | 40 | 78 | 2 | 2 | 0 | 6.3e-13 | 5.4e-15 |
| -   | 197.53 | - out    |    |    |    |   |   |   |         |         |
| -   | 197.56 | - out    |    |    |    |   |   |   |         |         |
| -   | 197.59 | - out    |    |    |    |   |   |   |         |         |
| -   | 197.62 | - out    |    |    |    |   |   |   |         |         |
| -   | 197.64 | - out    |    |    |    |   |   |   |         |         |
| -   | 197.67 | - out    |    |    |    |   |   |   |         |         |
| 379 | 197.68 | 0.15514  | 80 | 41 | 80 | 2 | 2 | 0 | 1.7e-12 | 4.5e-15 |
| -   | 197.7  | - out    |    |    |    |   |   |   |         |         |
| -   | 197.73 | - out    |    |    |    |   |   |   |         |         |
| -   | 197.75 | - out    |    |    |    |   |   |   |         |         |
| -   | 197.78 | - out    |    |    |    |   |   |   |         |         |
| -   | 197.81 | - out    |    |    |    |   |   |   |         |         |
| 380 | 197.83 | 0.15514  | 82 | 42 | 82 | 2 | 2 | 0 | 1.3e-12 | 3e-15   |
| -   | 197.84 | - out    |    |    |    |   |   |   |         |         |
| -   | 197.86 | - out    |    |    |    |   |   |   |         |         |
| -   | 197.89 | - out    |    |    |    |   |   |   |         |         |
| -   | 197.92 | - out    |    |    |    |   |   |   |         |         |
| -   | 197.95 | - out    |    |    |    |   |   |   |         |         |

|     |        |          |     |    |     |   |   |   |         |         |
|-----|--------|----------|-----|----|-----|---|---|---|---------|---------|
| -   | 197.97 | - out    |     |    |     |   |   |   |         |         |
| 381 | 197.99 | 0.15514  | 84  | 43 | 84  | 2 | 2 | 0 | 1.5e-12 | 3e-15   |
| -   | 198    | - out    |     |    |     |   |   |   |         |         |
| -   | 198.03 | - out    |     |    |     |   |   |   |         |         |
| -   | 198.06 | - out    |     |    |     |   |   |   |         |         |
| -   | 198.08 | - out    |     |    |     |   |   |   |         |         |
| -   | 198.11 | - out    |     |    |     |   |   |   |         |         |
| -   | 198.14 | - out    |     |    |     |   |   |   |         |         |
| 382 | 198.14 | 0.15514  | 86  | 44 | 86  | 2 | 2 | 0 | 9.6e-14 | 4.2e-15 |
| -   | 198.17 | - out    |     |    |     |   |   |   |         |         |
| -   | 198.19 | - out    |     |    |     |   |   |   |         |         |
| -   | 198.22 | - out    |     |    |     |   |   |   |         |         |
| -   | 198.25 | - out    |     |    |     |   |   |   |         |         |
| -   | 198.28 | - out    |     |    |     |   |   |   |         |         |
| -   | 198.3  | - out    |     |    |     |   |   |   |         |         |
| -   | 198.33 | - out    |     |    |     |   |   |   |         |         |
| -   | 198.36 | - out    |     |    |     |   |   |   |         |         |
| -   | 198.39 | - out    |     |    |     |   |   |   |         |         |
| -   | 198.41 | - out    |     |    |     |   |   |   |         |         |
| -   | 198.44 | - out    |     |    |     |   |   |   |         |         |
| 383 | 198.45 | 0.31029  | 88  | 45 | 88  | 2 | 2 | 0 | 3.1e-13 | 4.4e-15 |
| -   | 198.47 | - out    |     |    |     |   |   |   |         |         |
| -   | 198.5  | - out    |     |    |     |   |   |   |         |         |
| -   | 198.52 | - out    |     |    |     |   |   |   |         |         |
| -   | 198.55 | - out    |     |    |     |   |   |   |         |         |
| 384 | 198.57 | 0.12036  | 92  | 47 | 92  | 2 | 3 | 0 | 6.4e-13 | 4.6e-15 |
| -   | 198.58 | - out    |     |    |     |   |   |   |         |         |
| -   | 198.61 | - out    |     |    |     |   |   |   |         |         |
| -   | 198.63 | - out    |     |    |     |   |   |   |         |         |
| -   | 198.66 | - out    |     |    |     |   |   |   |         |         |
| -   | 198.69 | - out    |     |    |     |   |   |   |         |         |
| 385 | 198.69 | 0.12036  | 94  | 48 | 94  | 2 | 3 | 0 | 9.5e-14 | 4.4e-15 |
| -   | 198.72 | - out    |     |    |     |   |   |   |         |         |
| -   | 198.74 | - out    |     |    |     |   |   |   |         |         |
| 386 | 198.76 | 0.066976 | 98  | 50 | 98  | 2 | 4 | 0 | 2.4e-13 | 5.2e-15 |
| -   | 198.77 | - out    |     |    |     |   |   |   |         |         |
| -   | 198.8  | - out    |     |    |     |   |   |   |         |         |
| -   | 198.83 | - out    |     |    |     |   |   |   |         |         |
| 387 | 198.83 | 0.066976 | 100 | 51 | 100 | 2 | 4 | 0 | 2e-13   | 3.8e-15 |
| -   | 198.85 | - out    |     |    |     |   |   |   |         |         |
| -   | 198.88 | - out    |     |    |     |   |   |   |         |         |
| 388 | 198.89 | 0.060279 | 102 | 52 | 102 | 2 | 4 | 0 | 1.2e-13 | 5e-15   |
| -   | 198.91 | - out    |     |    |     |   |   |   |         |         |
| -   | 198.94 | - out    |     |    |     |   |   |   |         |         |
| 389 | 198.95 | 0.060279 | 104 | 53 | 104 | 2 | 4 | 0 | 1.9e-13 | 5.5e-15 |
| -   | 198.96 | - out    |     |    |     |   |   |   |         |         |
| -   | 198.99 | - out    |     |    |     |   |   |   |         |         |
| 390 | 199.01 | 0.060279 | 106 | 54 | 106 | 2 | 4 | 0 | 6.8e-14 | 6e-15   |
| -   | 199.02 | - out    |     |    |     |   |   |   |         |         |
| -   | 199.05 | - out    |     |    |     |   |   |   |         |         |
| 391 | 199.07 | 0.060279 | 108 | 55 | 108 | 2 | 4 | 0 | 2.4e-14 | 8.2e-15 |
| -   | 199.07 | - out    |     |    |     |   |   |   |         |         |
| -   | 199.1  | - out    |     |    |     |   |   |   |         |         |
| 392 | 199.13 | 0.060279 | 110 | 56 | 110 | 2 | 4 | 0 | 9.4e-15 | 2.4e-14 |
| -   | 199.13 | - out    |     |    |     |   |   |   |         |         |
| -   | 199.16 | - out    |     |    |     |   |   |   |         |         |

|     |        |          |     |    |     |   |   |   |         |         |
|-----|--------|----------|-----|----|-----|---|---|---|---------|---------|
| -   | 199.18 | - out    |     |    |     |   |   |   |         |         |
| 393 | 199.19 | 0.060279 | 112 | 57 | 112 | 2 | 4 | 0 | 3.6e-14 | 1.2e-14 |
| -   | 199.21 | - out    |     |    |     |   |   |   |         |         |
| -   | 199.24 | - out    |     |    |     |   |   |   |         |         |
| 394 | 199.25 | 0.060279 | 114 | 58 | 114 | 2 | 4 | 0 | 3.5e-14 | 8.6e-15 |
| -   | 199.27 | - out    |     |    |     |   |   |   |         |         |
| -   | 199.29 | - out    |     |    |     |   |   |   |         |         |
| 395 | 199.31 | 0.060279 | 116 | 59 | 116 | 2 | 4 | 0 | 1.8e-14 | 8.8e-15 |
| -   | 199.32 | - out    |     |    |     |   |   |   |         |         |
| -   | 199.35 | - out    |     |    |     |   |   |   |         |         |
| 396 | 199.37 | 0.060279 | 118 | 60 | 118 | 2 | 4 | 0 | 1.2e-14 | 7.8e-15 |
| -   | 199.38 | - out    |     |    |     |   |   |   |         |         |
| -   | 199.4  | - out    |     |    |     |   |   |   |         |         |
| 397 | 199.43 | 0.060279 | 120 | 61 | 120 | 2 | 4 | 0 | 2.3e-14 | 7.4e-15 |
| -   | 199.43 | - out    |     |    |     |   |   |   |         |         |
| -   | 199.46 | - out    |     |    |     |   |   |   |         |         |
| -   | 199.49 | - out    |     |    |     |   |   |   |         |         |
| 398 | 199.49 | 0.060279 | 122 | 62 | 122 | 2 | 4 | 0 | 2.3e-13 | 7.2e-15 |
| -   | 199.51 | - out    |     |    |     |   |   |   |         |         |
| -   | 199.54 | - out    |     |    |     |   |   |   |         |         |
| 399 | 199.55 | 0.060279 | 124 | 63 | 124 | 2 | 4 | 0 | 7.2e-14 | 6.1e-15 |
| -   | 199.57 | - out    |     |    |     |   |   |   |         |         |
| -   | 199.6  | - out    |     |    |     |   |   |   |         |         |
| 400 | 199.61 | 0.060279 | 126 | 64 | 126 | 2 | 4 | 0 | 5.1e-14 | 5.5e-15 |
| -   | 199.62 | - out    |     |    |     |   |   |   |         |         |
| -   | 199.65 | - out    |     |    |     |   |   |   |         |         |
| 401 | 199.67 | 0.060279 | 128 | 65 | 128 | 2 | 4 | 0 | 6.9e-14 | 5.2e-15 |
| -   | 199.68 | - out    |     |    |     |   |   |   |         |         |
| -   | 199.71 | - out    |     |    |     |   |   |   |         |         |
| 402 | 199.73 | 0.060279 | 130 | 66 | 130 | 2 | 4 | 0 | 1.6e-14 | 9.1e-15 |
| -   | 199.73 | - out    |     |    |     |   |   |   |         |         |
| -   | 199.76 | - out    |     |    |     |   |   |   |         |         |
| -   | 199.79 | - out    |     |    |     |   |   |   |         |         |
| 403 | 199.79 | 0.060279 | 132 | 67 | 132 | 2 | 4 | 0 | 3.4e-14 | 3.6e-15 |
| -   | 199.82 | - out    |     |    |     |   |   |   |         |         |
| -   | 199.84 | - out    |     |    |     |   |   |   |         |         |
| 404 | 199.85 | 0.060279 | 134 | 68 | 134 | 2 | 4 | 0 | 1.2e-13 | 3.6e-15 |
| -   | 199.87 | - out    |     |    |     |   |   |   |         |         |
| -   | 199.9  | - out    |     |    |     |   |   |   |         |         |
| 405 | 199.91 | 0.060279 | 136 | 69 | 136 | 2 | 4 | 0 | 3.1e-13 | 3.3e-15 |
| -   | 199.93 | - out    |     |    |     |   |   |   |         |         |
| -   | 199.95 | - out    |     |    |     |   |   |   |         |         |
| 406 | 199.97 | 0.060279 | 138 | 70 | 138 | 2 | 4 | 0 | 2.9e-13 | 3.3e-15 |
| -   | 199.98 | - out    |     |    |     |   |   |   |         |         |
| -   | 200.01 | - out    |     |    |     |   |   |   |         |         |
| 407 | 200.03 | 0.060279 | 140 | 71 | 140 | 2 | 4 | 0 | 3.7e-13 | 3.4e-15 |
| -   | 200.04 | - out    |     |    |     |   |   |   |         |         |
| -   | 200.06 | - out    |     |    |     |   |   |   |         |         |
| -   | 200.09 | - out    |     |    |     |   |   |   |         |         |
| 408 | 200.09 | 0.060279 | 142 | 72 | 142 | 2 | 4 | 0 | 2.8e-13 | 4.4e-15 |
| -   | 200.12 | - out    |     |    |     |   |   |   |         |         |
| -   | 200.15 | - out    |     |    |     |   |   |   |         |         |
| 409 | 200.15 | 0.060279 | 144 | 73 | 144 | 2 | 4 | 0 | 1.4e-12 | 5.4e-15 |
| -   | 200.17 | - out    |     |    |     |   |   |   |         |         |
| -   | 200.2  | - out    |     |    |     |   |   |   |         |         |
| 410 | 200.21 | 0.060279 | 146 | 74 | 146 | 2 | 4 | 0 | 3.5e-13 | 4e-15   |

|     |        |          |     |    |     |   |   |   |         |         |
|-----|--------|----------|-----|----|-----|---|---|---|---------|---------|
| -   | 200.23 | - out    |     |    |     |   |   |   |         |         |
| -   | 200.26 | - out    |     |    |     |   |   |   |         |         |
| 411 | 200.27 | 0.060279 | 148 | 75 | 148 | 2 | 4 | 0 | 7.2e-13 | 5.3e-15 |
| -   | 200.28 | - out    |     |    |     |   |   |   |         |         |
| -   | 200.31 | - out    |     |    |     |   |   |   |         |         |
| -   | 200.34 | - out    |     |    |     |   |   |   |         |         |
| -   | 200.37 | - out    |     |    |     |   |   |   |         |         |
| -   | 200.39 | - out    |     |    |     |   |   |   |         |         |
| 412 | 200.39 | 0.12056  | 150 | 76 | 150 | 2 | 4 | 0 | 5.1e-13 | 4.5e-15 |
| -   | 200.42 | - out    |     |    |     |   |   |   |         |         |
| -   | 200.45 | - out    |     |    |     |   |   |   |         |         |
| -   | 200.48 | - out    |     |    |     |   |   |   |         |         |
| -   | 200.5  | - out    |     |    |     |   |   |   |         |         |
| 413 | 200.51 | 0.12056  | 152 | 77 | 152 | 2 | 4 | 0 | 1.8e-12 | 4.6e-15 |
| -   | 200.53 | - out    |     |    |     |   |   |   |         |         |
| -   | 200.56 | - out    |     |    |     |   |   |   |         |         |
| -   | 200.59 | - out    |     |    |     |   |   |   |         |         |
| -   | 200.61 | - out    |     |    |     |   |   |   |         |         |
| 414 | 200.63 | 0.12056  | 154 | 78 | 154 | 2 | 4 | 0 | 5.2e-13 | 3.9e-15 |
| -   | 200.64 | - out    |     |    |     |   |   |   |         |         |
| -   | 200.67 | - out    |     |    |     |   |   |   |         |         |
| -   | 200.7  | - out    |     |    |     |   |   |   |         |         |
| -   | 200.72 | - out    |     |    |     |   |   |   |         |         |
| -   | 200.75 | - out    |     |    |     |   |   |   |         |         |
| 415 | 200.75 | 0.12056  | 156 | 79 | 156 | 2 | 4 | 0 | 2e-12   | 6.5e-15 |
| -   | 200.78 | - out    |     |    |     |   |   |   |         |         |
| -   | 200.81 | - out    |     |    |     |   |   |   |         |         |
| -   | 200.83 | - out    |     |    |     |   |   |   |         |         |
| -   | 200.86 | - out    |     |    |     |   |   |   |         |         |
| 416 | 200.88 | 0.12056  | 158 | 80 | 158 | 2 | 4 | 0 | 2.2e-13 | 7.1e-15 |
| -   | 200.89 | - out    |     |    |     |   |   |   |         |         |
| -   | 200.92 | - out    |     |    |     |   |   |   |         |         |
| -   | 200.94 | - out    |     |    |     |   |   |   |         |         |
| -   | 200.97 | - out    |     |    |     |   |   |   |         |         |
| 417 | 201    | 0.12056  | 160 | 81 | 160 | 2 | 4 | 0 | 4.5e-14 | 4.7e-15 |
| -   | 201    | - out    |     |    |     |   |   |   |         |         |
| -   | 201.03 | - out    |     |    |     |   |   |   |         |         |
| -   | 201.05 | - out    |     |    |     |   |   |   |         |         |
| -   | 201.08 | - out    |     |    |     |   |   |   |         |         |
| -   | 201.11 | - out    |     |    |     |   |   |   |         |         |
| 418 | 201.12 | 0.12056  | 162 | 82 | 162 | 2 | 4 | 0 | 2.4e-13 | 4.3e-15 |
| -   | 201.14 | - out    |     |    |     |   |   |   |         |         |
| -   | 201.16 | - out    |     |    |     |   |   |   |         |         |
| -   | 201.19 | - out    |     |    |     |   |   |   |         |         |
| -   | 201.22 | - out    |     |    |     |   |   |   |         |         |
| 419 | 201.24 | 0.12056  | 164 | 83 | 164 | 2 | 4 | 0 | 2.9e-13 | 3.8e-15 |
| -   | 201.24 | - out    |     |    |     |   |   |   |         |         |
| 420 | 201.36 | 0.12056  | 166 | 84 | 166 | 2 | 4 | 0 | 3.3e-13 | 2.9e-15 |

Number of vertex elements: 3  
 Number of boundary elements: 112  
 Number of vertex elements: 3  
 Number of boundary elements: 112  
 Number of elements: 534  
 Minimum element quality: 0.5661  
 Number of vertex elements: 4  
 Number of boundary elements: 162

Number of vertex elements: 5  
 Number of boundary elements: 212  
 Number of vertex elements: 6  
 Number of boundary elements: 266  
 Minimum element quality: 0.09645  
 Geometry shape function: Linear Lagrange  
 Time interval 5  
 Time-dependent solver (BDF)  
 Number of degrees of freedom solved for: 11758 (plus 7124 internal DOFs).  
 Nonsymmetric matrix found.  
 Scales for dependent variables:  
 Concentration (compl.cOx): 4.2  
 Concentration (compl.cRed): 2.8  
 Spatial mesh displacement (compl.spatial.disp): 1.4e-07

| Step | Time   | Stepsize | Res | Jac | Sol | Order | Tfail | NLfail | LinErr  | LinRes  |
|------|--------|----------|-----|-----|-----|-------|-------|--------|---------|---------|
| -    | 201.24 | - out    |     |     |     |       |       |        |         |         |
| -    | 201.25 | - out    |     |     |     |       |       |        |         |         |
| 421  | 201.26 | 0.0275   | 2   | 2   | 2   | 1     | 0     | 0      | 1.3e-14 | 2.7e-15 |
| -    | 201.27 | - out    |     |     |     |       |       |        |         |         |
| 422  | 201.29 | 0.0275   | 4   | 3   | 4   | 1     | 0     | 0      | 1.3e-13 | 3.2e-15 |
| -    | 201.3  | - out    |     |     |     |       |       |        |         |         |
| -    | 201.33 | - out    |     |     |     |       |       |        |         |         |
| 423  | 201.35 | 0.055    | 6   | 4   | 6   | 2     | 0     | 0      | 1.7e-13 | 3.1e-15 |
| -    | 201.36 | - out    |     |     |     |       |       |        |         |         |
| -    | 201.38 | - out    |     |     |     |       |       |        |         |         |
| -    | 201.41 | - out    |     |     |     |       |       |        |         |         |
| -    | 201.44 | - out    |     |     |     |       |       |        |         |         |
| 424  | 201.46 | 0.11     | 8   | 5   | 8   | 2     | 0     | 0      | 9.7e-14 | 3.2e-15 |
| -    | 201.47 | - out    |     |     |     |       |       |        |         |         |
| -    | 201.49 | - out    |     |     |     |       |       |        |         |         |
| -    | 201.52 | - out    |     |     |     |       |       |        |         |         |
| 425  | 201.55 | 0.090001 | 10  | 6   | 10  | 2     | 0     | 0      | 1.7e-13 | 3.6e-15 |
| -    | 201.55 | - out    |     |     |     |       |       |        |         |         |
| -    | 201.58 | - out    |     |     |     |       |       |        |         |         |
| -    | 201.6  | - out    |     |     |     |       |       |        |         |         |
| 426  | 201.62 | 0.077339 | 12  | 7   | 12  | 2     | 0     | 0      | 3.8e-14 | 3.5e-15 |
| -    | 201.63 | - out    |     |     |     |       |       |        |         |         |
| -    | 201.66 | - out    |     |     |     |       |       |        |         |         |
| -    | 201.69 | - out    |     |     |     |       |       |        |         |         |
| 427  | 201.69 | 0.064268 | 14  | 8   | 14  | 2     | 0     | 0      | 8.9e-14 | 4e-15   |
| -    | 201.71 | - out    |     |     |     |       |       |        |         |         |
| -    | 201.74 | - out    |     |     |     |       |       |        |         |         |
| 428  | 201.75 | 0.05694  | 16  | 9   | 16  | 2     | 0     | 0      | 1.3e-13 | 3.4e-15 |
| -    | 201.77 | - out    |     |     |     |       |       |        |         |         |
| -    | 201.8  | - out    |     |     |     |       |       |        |         |         |
| 429  | 201.8  | 0.051246 | 18  | 10  | 18  | 2     | 0     | 0      | 1.4e-13 | 6e-15   |
| -    | 201.82 | - out    |     |     |     |       |       |        |         |         |
| 430  | 201.85 | 0.051246 | 20  | 11  | 20  | 2     | 0     | 0      | 4.2e-14 | 5.6e-15 |
| -    | 201.85 | - out    |     |     |     |       |       |        |         |         |
| -    | 201.88 | - out    |     |     |     |       |       |        |         |         |
| 431  | 201.9  | 0.051246 | 22  | 12  | 22  | 2     | 0     | 0      | 1.9e-14 | 6.1e-15 |
| -    | 201.91 | - out    |     |     |     |       |       |        |         |         |
| -    | 201.93 | - out    |     |     |     |       |       |        |         |         |
| 432  | 201.95 | 0.051246 | 24  | 13  | 24  | 2     | 0     | 0      | 6.8e-14 | 4.3e-15 |
| -    | 201.96 | - out    |     |     |     |       |       |        |         |         |
| -    | 201.99 | - out    |     |     |     |       |       |        |         |         |

|     |        |          |    |    |    |   |   |   |         |         |
|-----|--------|----------|----|----|----|---|---|---|---------|---------|
| 433 | 202    | 0.051246 | 26 | 14 | 26 | 2 | 0 | 0 | 1.8e-14 | 3.7e-15 |
| -   | 202.02 | - out    |    |    |    |   |   |   |         |         |
| -   | 202.04 | - out    |    |    |    |   |   |   |         |         |
| 434 | 202.05 | 0.051246 | 28 | 15 | 28 | 2 | 0 | 0 | 4.1e-14 | 5e-15   |
| -   | 202.07 | - out    |    |    |    |   |   |   |         |         |
| -   | 202.1  | - out    |    |    |    |   |   |   |         |         |
| 435 | 202.1  | 0.051246 | 30 | 16 | 30 | 2 | 0 | 0 | 1.4e-14 | 4.2e-15 |
| -   | 202.13 | - out    |    |    |    |   |   |   |         |         |
| -   | 202.15 | - out    |    |    |    |   |   |   |         |         |
| 436 | 202.16 | 0.051246 | 32 | 17 | 32 | 2 | 0 | 0 | 4.5e-14 | 4.2e-15 |
| -   | 202.18 | - out    |    |    |    |   |   |   |         |         |
| 437 | 202.21 | 0.051246 | 34 | 18 | 34 | 2 | 0 | 0 | 9.5e-15 | 3.7e-15 |
| -   | 202.21 | - out    |    |    |    |   |   |   |         |         |
| -   | 202.24 | - out    |    |    |    |   |   |   |         |         |
| 438 | 202.26 | 0.051246 | 36 | 19 | 36 | 2 | 0 | 0 | 9.9e-15 | 4.3e-15 |
| -   | 202.26 | - out    |    |    |    |   |   |   |         |         |
| -   | 202.29 | - out    |    |    |    |   |   |   |         |         |
| 439 | 202.31 | 0.051246 | 38 | 20 | 38 | 2 | 0 | 0 | 2.1e-14 | 9.8e-15 |
| -   | 202.32 | - out    |    |    |    |   |   |   |         |         |
| -   | 202.35 | - out    |    |    |    |   |   |   |         |         |
| -   | 202.37 | - out    |    |    |    |   |   |   |         |         |
| -   | 202.4  | - out    |    |    |    |   |   |   |         |         |
| 440 | 202.41 | 0.10249  | 40 | 21 | 40 | 2 | 0 | 0 | 1.3e-13 | 4.2e-15 |
| -   | 202.43 | - out    |    |    |    |   |   |   |         |         |
| -   | 202.46 | - out    |    |    |    |   |   |   |         |         |
| -   | 202.48 | - out    |    |    |    |   |   |   |         |         |
| 441 | 202.5  | 0.091526 | 42 | 22 | 42 | 2 | 0 | 0 | 1e-13   | 4e-15   |
| -   | 202.51 | - out    |    |    |    |   |   |   |         |         |
| -   | 202.54 | - out    |    |    |    |   |   |   |         |         |
| -   | 202.57 | - out    |    |    |    |   |   |   |         |         |
| 442 | 202.59 | 0.082373 | 44 | 23 | 44 | 2 | 0 | 0 | 1e-13   | 2.8e-15 |
| -   | 202.59 | - out    |    |    |    |   |   |   |         |         |
| -   | 202.62 | - out    |    |    |    |   |   |   |         |         |
| -   | 202.65 | - out    |    |    |    |   |   |   |         |         |
| 443 | 202.66 | 0.074136 | 46 | 24 | 46 | 2 | 0 | 0 | 5.5e-14 | 3e-15   |
| -   | 202.68 | - out    |    |    |    |   |   |   |         |         |
| -   | 202.7  | - out    |    |    |    |   |   |   |         |         |
| -   | 202.73 | - out    |    |    |    |   |   |   |         |         |
| 444 | 202.73 | 0.074136 | 48 | 25 | 48 | 2 | 0 | 0 | 2.1e-13 | 4.5e-15 |
| -   | 202.76 | - out    |    |    |    |   |   |   |         |         |
| -   | 202.79 | - out    |    |    |    |   |   |   |         |         |
| 445 | 202.81 | 0.074136 | 50 | 26 | 50 | 2 | 0 | 0 | 3.7e-13 | 3.7e-15 |
| -   | 202.81 | - out    |    |    |    |   |   |   |         |         |
| -   | 202.84 | - out    |    |    |    |   |   |   |         |         |
| -   | 202.87 | - out    |    |    |    |   |   |   |         |         |
| 446 | 202.88 | 0.074136 | 52 | 27 | 52 | 2 | 0 | 0 | 7.5e-13 | 5.4e-15 |
| -   | 202.9  | - out    |    |    |    |   |   |   |         |         |
| -   | 202.92 | - out    |    |    |    |   |   |   |         |         |
| -   | 202.95 | - out    |    |    |    |   |   |   |         |         |
| 447 | 202.96 | 0.074136 | 54 | 28 | 54 | 2 | 0 | 0 | 6.1e-13 | 3.5e-15 |
| -   | 202.98 | - out    |    |    |    |   |   |   |         |         |
| -   | 203.01 | - out    |    |    |    |   |   |   |         |         |
| 448 | 203.03 | 0.074136 | 56 | 29 | 56 | 2 | 0 | 0 | 5.4e-13 | 3.4e-15 |
| -   | 203.03 | - out    |    |    |    |   |   |   |         |         |
| -   | 203.06 | - out    |    |    |    |   |   |   |         |         |
| -   | 203.09 | - out    |    |    |    |   |   |   |         |         |

|     |        |          |    |    |    |   |   |   |         |         |  |
|-----|--------|----------|----|----|----|---|---|---|---------|---------|--|
| -   | 203.12 | - out    |    |    |    |   |   |   |         |         |  |
| -   | 203.14 | - out    |    |    |    |   |   |   |         |         |  |
| -   | 203.17 | - out    |    |    |    |   |   |   |         |         |  |
| 449 | 203.18 | 0.14827  | 58 | 30 | 58 | 2 | 0 | 0 | 1.3e-12 | 4.4e-15 |  |
| -   | 203.2  | - out    |    |    |    |   |   |   |         |         |  |
| -   | 203.23 | - out    |    |    |    |   |   |   |         |         |  |
| -   | 203.25 | - out    |    |    |    |   |   |   |         |         |  |
| -   | 203.28 | - out    |    |    |    |   |   |   |         |         |  |
| -   | 203.31 | - out    |    |    |    |   |   |   |         |         |  |
| 450 | 203.33 | 0.14827  | 60 | 31 | 60 | 2 | 0 | 0 | 2.7e-13 | 3.1e-15 |  |
| -   | 203.34 | - out    |    |    |    |   |   |   |         |         |  |
| -   | 203.36 | - out    |    |    |    |   |   |   |         |         |  |
| -   | 203.39 | - out    |    |    |    |   |   |   |         |         |  |
| -   | 203.42 | - out    |    |    |    |   |   |   |         |         |  |
| -   | 203.45 | - out    |    |    |    |   |   |   |         |         |  |
| -   | 203.47 | - out    |    |    |    |   |   |   |         |         |  |
| 451 | 203.48 | 0.14827  | 62 | 32 | 62 | 2 | 0 | 0 | 4.4e-13 | 4.5e-15 |  |
| -   | 203.5  | - out    |    |    |    |   |   |   |         |         |  |
| -   | 203.53 | - out    |    |    |    |   |   |   |         |         |  |
| -   | 203.56 | - out    |    |    |    |   |   |   |         |         |  |
| -   | 203.58 | - out    |    |    |    |   |   |   |         |         |  |
| -   | 203.61 | - out    |    |    |    |   |   |   |         |         |  |
| 452 | 203.62 | 0.14827  | 64 | 33 | 64 | 2 | 0 | 0 | 2.3e-13 | 8.4e-15 |  |
| -   | 203.64 | - out    |    |    |    |   |   |   |         |         |  |
| -   | 203.67 | - out    |    |    |    |   |   |   |         |         |  |
| -   | 203.69 | - out    |    |    |    |   |   |   |         |         |  |
| -   | 203.72 | - out    |    |    |    |   |   |   |         |         |  |
| -   | 203.75 | - out    |    |    |    |   |   |   |         |         |  |
| -   | 203.78 | - out    |    |    |    |   |   |   |         |         |  |
| -   | 203.8  | - out    |    |    |    |   |   |   |         |         |  |
| -   | 203.83 | - out    |    |    |    |   |   |   |         |         |  |
| -   | 203.86 | - out    |    |    |    |   |   |   |         |         |  |
| -   | 203.89 | - out    |    |    |    |   |   |   |         |         |  |
| -   | 203.91 | - out    |    |    |    |   |   |   |         |         |  |
| 453 | 203.92 | 0.29654  | 66 | 34 | 66 | 2 | 0 | 0 | 2.2e-13 | 4.1e-15 |  |
| -   | 203.94 | - out    |    |    |    |   |   |   |         |         |  |
| -   | 203.97 | - out    |    |    |    |   |   |   |         |         |  |
| -   | 204    | - out    |    |    |    |   |   |   |         |         |  |
| -   | 204.02 | - out    |    |    |    |   |   |   |         |         |  |
| 454 | 204.04 | 0.11543  | 70 | 36 | 70 | 2 | 1 | 0 | 4.3e-13 | 4.2e-15 |  |
| -   | 204.05 | - out    |    |    |    |   |   |   |         |         |  |
| -   | 204.08 | - out    |    |    |    |   |   |   |         |         |  |
| -   | 204.11 | - out    |    |    |    |   |   |   |         |         |  |
| -   | 204.13 | - out    |    |    |    |   |   |   |         |         |  |
| 455 | 204.15 | 0.11543  | 72 | 37 | 72 | 2 | 1 | 0 | 4.1e-13 | 4.2e-15 |  |
| -   | 204.16 | - out    |    |    |    |   |   |   |         |         |  |
| -   | 204.19 | - out    |    |    |    |   |   |   |         |         |  |
| 456 | 204.21 | 0.063119 | 76 | 39 | 76 | 2 | 2 | 0 | 6.4e-13 | 5e-15   |  |
| -   | 204.22 | - out    |    |    |    |   |   |   |         |         |  |
| -   | 204.24 | - out    |    |    |    |   |   |   |         |         |  |
| -   | 204.27 | - out    |    |    |    |   |   |   |         |         |  |
| 457 | 204.28 | 0.063119 | 78 | 40 | 78 | 2 | 2 | 0 | 2.6e-13 | 3.9e-15 |  |
| -   | 204.3  | - out    |    |    |    |   |   |   |         |         |  |
| -   | 204.33 | - out    |    |    |    |   |   |   |         |         |  |
| 458 | 204.33 | 0.056808 | 80 | 41 | 80 | 2 | 2 | 0 | 1.6e-13 | 4.3e-15 |  |
| -   | 204.35 | - out    |    |    |    |   |   |   |         |         |  |



|     |        |          |     |    |     |   |   |   |         |         |
|-----|--------|----------|-----|----|-----|---|---|---|---------|---------|
| -   | 204.38 | - out    |     |    |     |   |   |   |         |         |
| 459 | 204.39 | 0.056808 | 82  | 42 | 82  | 2 | 2 | 0 | 8.1e-14 | 6.5e-15 |
| -   | 204.41 | - out    |     |    |     |   |   |   |         |         |
| -   | 204.44 | - out    |     |    |     |   |   |   |         |         |
| 460 | 204.45 | 0.056808 | 84  | 43 | 84  | 2 | 2 | 0 | 1e-13   | 6.7e-15 |
| -   | 204.46 | - out    |     |    |     |   |   |   |         |         |
| -   | 204.49 | - out    |     |    |     |   |   |   |         |         |
| 461 | 204.5  | 0.056808 | 86  | 44 | 86  | 2 | 2 | 0 | 8.8e-14 | 8.5e-15 |
| -   | 204.52 | - out    |     |    |     |   |   |   |         |         |
| -   | 204.55 | - out    |     |    |     |   |   |   |         |         |
| 462 | 204.56 | 0.056808 | 88  | 45 | 88  | 2 | 2 | 0 | 4.1e-14 | 1.3e-14 |
| -   | 204.57 | - out    |     |    |     |   |   |   |         |         |
| -   | 204.6  | - out    |     |    |     |   |   |   |         |         |
| 463 | 204.62 | 0.056808 | 90  | 46 | 90  | 2 | 2 | 0 | 3.1e-14 | 1.8e-14 |
| -   | 204.63 | - out    |     |    |     |   |   |   |         |         |
| -   | 204.66 | - out    |     |    |     |   |   |   |         |         |
| 464 | 204.67 | 0.056808 | 92  | 47 | 92  | 2 | 2 | 0 | 1.9e-14 | 2.4e-14 |
| -   | 204.68 | - out    |     |    |     |   |   |   |         |         |
| -   | 204.71 | - out    |     |    |     |   |   |   |         |         |
| -   | 204.74 | - out    |     |    |     |   |   |   |         |         |
| -   | 204.77 | - out    |     |    |     |   |   |   |         |         |
| 465 | 204.79 | 0.11362  | 94  | 48 | 94  | 2 | 2 | 0 | 1.4e-14 | 5.2e-14 |
| -   | 204.79 | - out    |     |    |     |   |   |   |         |         |
| -   | 204.82 | - out    |     |    |     |   |   |   |         |         |
| -   | 204.85 | - out    |     |    |     |   |   |   |         |         |
| -   | 204.88 | - out    |     |    |     |   |   |   |         |         |
| 466 | 204.89 | 0.10225  | 96  | 49 | 96  | 2 | 2 | 0 | 1.2e-13 | 8e-15   |
| -   | 204.9  | - out    |     |    |     |   |   |   |         |         |
| -   | 204.93 | - out    |     |    |     |   |   |   |         |         |
| -   | 204.96 | - out    |     |    |     |   |   |   |         |         |
| -   | 204.99 | - out    |     |    |     |   |   |   |         |         |
| 467 | 204.99 | 0.10225  | 98  | 50 | 98  | 2 | 2 | 0 | 8.2e-14 | 7.2e-15 |
| -   | 205.01 | - out    |     |    |     |   |   |   |         |         |
| -   | 205.04 | - out    |     |    |     |   |   |   |         |         |
| -   | 205.07 | - out    |     |    |     |   |   |   |         |         |
| 468 | 205.08 | 0.092028 | 100 | 51 | 100 | 2 | 2 | 0 | 5.8e-14 | 5.4e-15 |
| -   | 205.1  | - out    |     |    |     |   |   |   |         |         |
| -   | 205.12 | - out    |     |    |     |   |   |   |         |         |
| -   | 205.15 | - out    |     |    |     |   |   |   |         |         |
| 469 | 205.16 | 0.079069 | 102 | 52 | 102 | 2 | 2 | 0 | 7.5e-14 | 4.4e-15 |
| -   | 205.18 | - out    |     |    |     |   |   |   |         |         |
| -   | 205.21 | - out    |     |    |     |   |   |   |         |         |
| -   | 205.23 | - out    |     |    |     |   |   |   |         |         |
| 470 | 205.24 | 0.071162 | 104 | 53 | 104 | 2 | 2 | 0 | 1.4e-13 | 6.1e-15 |
| -   | 205.26 | - out    |     |    |     |   |   |   |         |         |
| -   | 205.29 | - out    |     |    |     |   |   |   |         |         |
| 471 | 205.31 | 0.071162 | 106 | 54 | 106 | 2 | 2 | 0 | 1.8e-13 | 5.3e-15 |
| -   | 205.32 | - out    |     |    |     |   |   |   |         |         |
| -   | 205.34 | - out    |     |    |     |   |   |   |         |         |
| -   | 205.37 | - out    |     |    |     |   |   |   |         |         |
| 472 | 205.38 | 0.071162 | 108 | 55 | 108 | 2 | 2 | 0 | 8.3e-14 | 3.8e-15 |
| -   | 205.4  | - out    |     |    |     |   |   |   |         |         |
| -   | 205.43 | - out    |     |    |     |   |   |   |         |         |
| 473 | 205.45 | 0.071162 | 110 | 56 | 110 | 2 | 2 | 0 | 1.3e-13 | 4.8e-15 |
| -   | 205.45 | - out    |     |    |     |   |   |   |         |         |
| -   | 205.48 | - out    |     |    |     |   |   |   |         |         |

|     |        |          |     |    |     |   |   |   |         |         |
|-----|--------|----------|-----|----|-----|---|---|---|---------|---------|
| -   | 205.51 | - out    |     |    |     |   |   |   |         |         |
| 474 | 205.52 | 0.071162 | 112 | 57 | 112 | 2 | 2 | 0 | 3.2e-13 | 4.4e-15 |
| -   | 205.54 | - out    |     |    |     |   |   |   |         |         |
| -   | 205.56 | - out    |     |    |     |   |   |   |         |         |
| -   | 205.59 | - out    |     |    |     |   |   |   |         |         |
| 475 | 205.59 | 0.071162 | 114 | 58 | 114 | 2 | 2 | 0 | 9.8e-14 | 2.8e-15 |
| -   | 205.62 | - out    |     |    |     |   |   |   |         |         |
| -   | 205.65 | - out    |     |    |     |   |   |   |         |         |
| 476 | 205.66 | 0.071162 | 116 | 59 | 116 | 2 | 2 | 0 | 5.6e-13 | 4.3e-15 |
| -   | 205.67 | - out    |     |    |     |   |   |   |         |         |
| -   | 205.7  | - out    |     |    |     |   |   |   |         |         |
| -   | 205.73 | - out    |     |    |     |   |   |   |         |         |
| 477 | 205.73 | 0.071162 | 118 | 60 | 118 | 2 | 2 | 0 | 1.3e-12 | 5.5e-15 |
| -   | 205.76 | - out    |     |    |     |   |   |   |         |         |
| -   | 205.78 | - out    |     |    |     |   |   |   |         |         |
| 478 | 205.8  | 0.071162 | 120 | 61 | 120 | 2 | 2 | 0 | 1.1e-13 | 4.8e-15 |
| -   | 205.81 | - out    |     |    |     |   |   |   |         |         |
| -   | 205.84 | - out    |     |    |     |   |   |   |         |         |
| -   | 205.87 | - out    |     |    |     |   |   |   |         |         |
| 479 | 205.88 | 0.071162 | 122 | 62 | 122 | 2 | 2 | 0 | 7.6e-13 | 3.8e-15 |
| -   | 205.89 | - out    |     |    |     |   |   |   |         |         |
| -   | 205.92 | - out    |     |    |     |   |   |   |         |         |
| 480 | 205.95 | 0.071162 | 124 | 63 | 124 | 2 | 2 | 0 | 1.3e-12 | 5.7e-15 |
| -   | 205.95 | - out    |     |    |     |   |   |   |         |         |
| -   | 205.98 | - out    |     |    |     |   |   |   |         |         |
| -   | 206    | - out    |     |    |     |   |   |   |         |         |
| 481 | 206.02 | 0.071162 | 126 | 64 | 126 | 2 | 2 | 0 | 4.4e-13 | 4.1e-15 |
| -   | 206.03 | - out    |     |    |     |   |   |   |         |         |
| -   | 206.06 | - out    |     |    |     |   |   |   |         |         |
| -   | 206.09 | - out    |     |    |     |   |   |   |         |         |
| 482 | 206.09 | 0.071162 | 128 | 65 | 128 | 2 | 2 | 0 | 4.8e-13 | 3.4e-15 |
| -   | 206.11 | - out    |     |    |     |   |   |   |         |         |
| -   | 206.14 | - out    |     |    |     |   |   |   |         |         |
| -   | 206.17 | - out    |     |    |     |   |   |   |         |         |
| -   | 206.2  | - out    |     |    |     |   |   |   |         |         |
| -   | 206.22 | - out    |     |    |     |   |   |   |         |         |
| 483 | 206.23 | 0.14232  | 130 | 66 | 130 | 2 | 2 | 0 | 2.9e-13 | 4.4e-15 |
| -   | 206.25 | - out    |     |    |     |   |   |   |         |         |
| -   | 206.28 | - out    |     |    |     |   |   |   |         |         |
| -   | 206.31 | - out    |     |    |     |   |   |   |         |         |
| -   | 206.33 | - out    |     |    |     |   |   |   |         |         |
| -   | 206.36 | - out    |     |    |     |   |   |   |         |         |
| 484 | 206.37 | 0.14232  | 132 | 67 | 132 | 2 | 2 | 0 | 3.3e-14 | 2.4e-14 |
| -   | 206.39 | - out    |     |    |     |   |   |   |         |         |
| -   | 206.42 | - out    |     |    |     |   |   |   |         |         |
| -   | 206.44 | - out    |     |    |     |   |   |   |         |         |
| -   | 206.47 | - out    |     |    |     |   |   |   |         |         |
| -   | 206.5  | - out    |     |    |     |   |   |   |         |         |
| 485 | 206.52 | 0.14232  | 134 | 68 | 134 | 2 | 2 | 0 | 2.5e-14 | 2.2e-14 |
| -   | 206.52 | - out    |     |    |     |   |   |   |         |         |
| 486 | 206.66 | 0.14232  | 136 | 69 | 136 | 2 | 2 | 0 | 4.6e-13 | 3.4e-15 |

Number of vertex elements: 3  
 Number of boundary elements: 112  
 Number of vertex elements: 3  
 Number of boundary elements: 112  
 Number of elements: 534

Minimum element quality: 0.5661  
 Number of vertex elements: 4  
 Number of boundary elements: 162  
 Number of vertex elements: 5  
 Number of boundary elements: 212  
 Number of vertex elements: 6  
 Number of boundary elements: 266  
 Minimum element quality: 0.07019  
 Geometry shape function: Linear Lagrange  
 Time interval 6  
 Time-dependent solver (BDF)  
 Number of degrees of freedom solved for: 11758 (plus 7124 internal DOFs).  
 Nonsymmetric matrix found.  
 Scales for dependent variables:  
 Concentration (compl.cOx): 4.8  
 Concentration (compl.cRed): 3.2  
 Spatial mesh displacement (compl.spatial.disp): 1.4e-07

| Step | Time   | Stepsize | Res | Jac | Sol | Order | Tfail | NLfail | LinErr  | LinRes  |
|------|--------|----------|-----|-----|-----|-------|-------|--------|---------|---------|
| -    | 206.52 | - out    |     |     |     |       |       |        |         |         |
| -    | 206.53 | - out    |     |     |     |       |       |        |         |         |
| 487  | 206.54 | 0.0275   | 2   | 2   | 2   | 1     | 0     | 0      | 1.6e-14 | 2.7e-15 |
| -    | 206.55 | - out    |     |     |     |       |       |        |         |         |
| 488  | 206.57 | 0.0275   | 4   | 3   | 4   | 1     | 0     | 0      | 1.5e-13 | 3.6e-15 |
| -    | 206.58 | - out    |     |     |     |       |       |        |         |         |
| -    | 206.61 | - out    |     |     |     |       |       |        |         |         |
| 489  | 206.63 | 0.055    | 6   | 4   | 6   | 2     | 0     | 0      | 2.9e-14 | 2.2e-15 |
| -    | 206.64 | - out    |     |     |     |       |       |        |         |         |
| -    | 206.66 | - out    |     |     |     |       |       |        |         |         |
| 490  | 206.68 | 0.055    | 8   | 5   | 8   | 2     | 0     | 0      | 4.9e-13 | 5.2e-15 |
| -    | 206.69 | - out    |     |     |     |       |       |        |         |         |
| -    | 206.72 | - out    |     |     |     |       |       |        |         |         |
| -    | 206.75 | - out    |     |     |     |       |       |        |         |         |
| -    | 206.77 | - out    |     |     |     |       |       |        |         |         |
| 491  | 206.79 | 0.11     | 10  | 6   | 10  | 2     | 0     | 0      | 1.5e-13 | 3.1e-15 |
| -    | 206.8  | - out    |     |     |     |       |       |        |         |         |
| -    | 206.83 | - out    |     |     |     |       |       |        |         |         |
| -    | 206.86 | - out    |     |     |     |       |       |        |         |         |
| -    | 206.88 | - out    |     |     |     |       |       |        |         |         |
| 492  | 206.9  | 0.11     | 12  | 7   | 12  | 2     | 0     | 0      | 6.2e-13 | 6.1e-15 |
| -    | 206.91 | - out    |     |     |     |       |       |        |         |         |
| -    | 206.94 | - out    |     |     |     |       |       |        |         |         |
| 493  | 206.96 | 0.063869 | 16  | 9   | 16  | 2     | 1     | 0      | 6.2e-14 | 4.8e-15 |
| -    | 206.97 | - out    |     |     |     |       |       |        |         |         |
| -    | 206.99 | - out    |     |     |     |       |       |        |         |         |
| -    | 207.02 | - out    |     |     |     |       |       |        |         |         |
| 494  | 207.03 | 0.063869 | 18  | 10  | 18  | 2     | 1     | 0      | 2.3e-13 | 4e-15   |
| -    | 207.05 | - out    |     |     |     |       |       |        |         |         |
| -    | 207.08 | - out    |     |     |     |       |       |        |         |         |
| 495  | 207.09 | 0.057482 | 20  | 11  | 20  | 2     | 1     | 0      | 2.8e-14 | 5.2e-15 |
| -    | 207.1  | - out    |     |     |     |       |       |        |         |         |
| -    | 207.13 | - out    |     |     |     |       |       |        |         |         |
| 496  | 207.14 | 0.051734 | 22  | 12  | 22  | 2     | 1     | 0      | 5e-14   | 5.9e-15 |
| -    | 207.16 | - out    |     |     |     |       |       |        |         |         |
| 497  | 207.18 | 0.046561 | 24  | 13  | 24  | 2     | 1     | 0      | 7.1e-14 | 4.8e-15 |
| -    | 207.19 | - out    |     |     |     |       |       |        |         |         |
| -    | 207.21 | - out    |     |     |     |       |       |        |         |         |

|     |        |          |    |    |    |   |   |   |         |         |
|-----|--------|----------|----|----|----|---|---|---|---------|---------|
| 498 | 207.23 | 0.046561 | 26 | 14 | 26 | 2 | 1 | 0 | 4.9e-14 | 4e-15   |
| -   | 207.24 | - out    |    |    |    |   |   |   |         |         |
| -   | 207.27 | - out    |    |    |    |   |   |   |         |         |
| 499 | 207.28 | 0.046561 | 28 | 15 | 28 | 2 | 1 | 0 | 1.1e-13 | 5.5e-15 |
| -   | 207.3  | - out    |    |    |    |   |   |   |         |         |
| -   | 207.32 | - out    |    |    |    |   |   |   |         |         |
| 500 | 207.32 | 0.046561 | 30 | 16 | 30 | 2 | 1 | 0 | 5.2e-14 | 4.1e-15 |
| -   | 207.35 | - out    |    |    |    |   |   |   |         |         |
| 501 | 207.37 | 0.046561 | 32 | 17 | 32 | 2 | 1 | 0 | 2.6e-14 | 2.6e-14 |
| -   | 207.38 | - out    |    |    |    |   |   |   |         |         |
| -   | 207.41 | - out    |    |    |    |   |   |   |         |         |
| 502 | 207.42 | 0.046561 | 34 | 18 | 34 | 2 | 1 | 0 | 2.7e-14 | 4e-15   |
| -   | 207.43 | - out    |    |    |    |   |   |   |         |         |
| -   | 207.46 | - out    |    |    |    |   |   |   |         |         |
| 503 | 207.46 | 0.046561 | 36 | 19 | 36 | 2 | 1 | 0 | 3.8e-14 | 4.4e-15 |
| -   | 207.49 | - out    |    |    |    |   |   |   |         |         |
| 504 | 207.51 | 0.046561 | 38 | 20 | 38 | 2 | 1 | 0 | 7.6e-14 | 4.3e-15 |
| -   | 207.52 | - out    |    |    |    |   |   |   |         |         |
| -   | 207.54 | - out    |    |    |    |   |   |   |         |         |
| 505 | 207.56 | 0.046561 | 40 | 21 | 40 | 2 | 1 | 0 | 4.7e-14 | 5.7e-15 |
| -   | 207.57 | - out    |    |    |    |   |   |   |         |         |
| -   | 207.6  | - out    |    |    |    |   |   |   |         |         |
| 506 | 207.6  | 0.046561 | 42 | 22 | 42 | 2 | 1 | 0 | 2.5e-14 | 5.2e-15 |
| -   | 207.63 | - out    |    |    |    |   |   |   |         |         |
| 507 | 207.65 | 0.046561 | 44 | 23 | 44 | 2 | 1 | 0 | 2.8e-14 | 4.2e-15 |
| -   | 207.65 | - out    |    |    |    |   |   |   |         |         |
| -   | 207.68 | - out    |    |    |    |   |   |   |         |         |
| 508 | 207.7  | 0.046561 | 46 | 24 | 46 | 2 | 1 | 0 | 5.8e-14 | 5.1e-15 |
| -   | 207.71 | - out    |    |    |    |   |   |   |         |         |
| -   | 207.74 | - out    |    |    |    |   |   |   |         |         |
| 509 | 207.74 | 0.046561 | 48 | 25 | 48 | 2 | 1 | 0 | 3.1e-14 | 6.4e-15 |
| -   | 207.76 | - out    |    |    |    |   |   |   |         |         |
| 510 | 207.79 | 0.046561 | 50 | 26 | 50 | 2 | 1 | 0 | 4.2e-14 | 5.5e-15 |
| -   | 207.79 | - out    |    |    |    |   |   |   |         |         |
| -   | 207.82 | - out    |    |    |    |   |   |   |         |         |
| -   | 207.85 | - out    |    |    |    |   |   |   |         |         |
| -   | 207.87 | - out    |    |    |    |   |   |   |         |         |
| 511 | 207.88 | 0.093121 | 52 | 27 | 52 | 2 | 1 | 0 | 6.2e-14 | 4.7e-15 |
| -   | 207.9  | - out    |    |    |    |   |   |   |         |         |
| -   | 207.93 | - out    |    |    |    |   |   |   |         |         |
| -   | 207.96 | - out    |    |    |    |   |   |   |         |         |
| 512 | 207.97 | 0.083809 | 54 | 28 | 54 | 2 | 1 | 0 | 2e-13   | 4.7e-15 |
| -   | 207.98 | - out    |    |    |    |   |   |   |         |         |
| -   | 208.01 | - out    |    |    |    |   |   |   |         |         |
| -   | 208.04 | - out    |    |    |    |   |   |   |         |         |
| 513 | 208.05 | 0.083809 | 56 | 29 | 56 | 2 | 1 | 0 | 1e-13   | 4.2e-15 |
| -   | 208.07 | - out    |    |    |    |   |   |   |         |         |
| -   | 208.09 | - out    |    |    |    |   |   |   |         |         |
| -   | 208.12 | - out    |    |    |    |   |   |   |         |         |
| 514 | 208.13 | 0.075428 | 58 | 30 | 58 | 2 | 1 | 0 | 4.6e-14 | 2.8e-15 |
| -   | 208.15 | - out    |    |    |    |   |   |   |         |         |
| -   | 208.18 | - out    |    |    |    |   |   |   |         |         |
| 515 | 208.2  | 0.075428 | 60 | 31 | 60 | 2 | 1 | 0 | 1.9e-13 | 4.2e-15 |
| -   | 208.2  | - out    |    |    |    |   |   |   |         |         |
| -   | 208.23 | - out    |    |    |    |   |   |   |         |         |
| -   | 208.26 | - out    |    |    |    |   |   |   |         |         |

```

516    208.28    0.075428    62    32    62    2    1    0    2e-13    3e-15
-      208.29          - out
-      208.31          - out
-      208.34          - out
517    208.35    0.075428    64    33    64    2    1    0    3.9e-13    4.3e-15
-      208.37          - out
-      208.4          - out
-      208.42          - out
518    208.43    0.075428    66    34    66    2    1    0    1e-12    3e-15
-      208.45          - out
-      208.48          - out
519    208.5     0.075428    68    35    68    2    1    0    4.4e-13    4.4e-15
-      208.51          - out
-      208.53          - out
-      208.56          - out
520    208.58    0.075428    70    36    70    2    1    0    3.8e-13    3.4e-15
-      208.59          - out
-      208.62          - out
-      208.64          - out
-      208.67          - out
-      208.7          - out
-      208.73          - out
521    208.73    0.15086     72    37    72    2    1    0    7.3e-13    3e-15
-      208.75          - out
-      208.78          - out
-      208.81          - out
-      208.84          - out
-      208.86          - out
522    208.88    0.15086     74    38    74    2    1    0    1.4e-12    3.3e-15
-      208.89          - out
-      208.92          - out
-      208.95          - out
-      208.97          - out
-      209            - out
523    209.03    0.15086     76    39    76    2    1    0    2.1e-13    4.7e-15

```

Time-stepping completed.

Geometry shape function: Linear Lagrange

Solution time: 639 s. (10 minutes, 39 seconds)

Physical memory: 2.82 GB

Virtual memory: 2.92 GB

Ended at May 31, 2023 11:17:24 AM.

----- Time-Dependent Solver 1 in Study 4 (CV 31 to 38)/Solution 8 (sol8) ----->

### Advanced (aDef)

#### ASSEMBLY SETTINGS

| Description            | Value |
|------------------------|-------|
| Reuse sparsity pattern | On    |

### Fully Coupled 1 (fc1)

#### GENERAL

| Description | Value |
|-------------|-------|
|-------------|-------|

| Description   | Value                    |
|---------------|--------------------------|
| Linear solver | <a href="#">Direct 1</a> |

#### METHOD AND TERMINATION

| Description                    | Value                 |
|--------------------------------|-----------------------|
| Damping factor                 | 0.9                   |
| Jacobian update                | Once per time step    |
| Maximum number of iterations   | 8                     |
| Stabilization and acceleration | Anderson acceleration |
| Dimension of iteration space   | 5                     |

#### Automatic Remeshing 1 (ar1)

##### GENERAL

| Description        | Value                      |
|--------------------|----------------------------|
| Remesh in geometry | <a href="#">Geometry 1</a> |

##### CONDITION FOR REMESHING

| Description    | Value      |
|----------------|------------|
| Condition type | Distortion |

##### OUTPUT

| Description | Value                                |
|-------------|--------------------------------------|
| Solution    | <a href="#">Remeshed Solution 4</a>  |
| Meshes      | {mesh6, mesh7, mesh8, mesh9, mesh10} |

## 7 Study 5 (CV 39 to 44)

### COMPUTATION INFORMATION

|                  |             |
|------------------|-------------|
| Computation time | 17 min 17 s |
|------------------|-------------|

### 7.1 TIME DEPENDENT

| Times                               | Unit |
|-------------------------------------|------|
| range(38*t_cv,t_tot/nb/200,44*t_cv) | s    |

### STUDY SETTINGS

| Description                    | Value |
|--------------------------------|-------|
| Include geometric nonlinearity | Off   |

### STUDY SETTINGS

| Description  | Value                                                                                                                                                                                                                                                                                                                                                                                                                                                                                                                                                                                                                                                                                                                                                                                                                                                                                                                                                                                                                                                                                                                                                                                                                                                                                                                                                                                                                                                                                                                                                                                                                                                                                                                                                                                                                                                                                                                                |
|--------------|--------------------------------------------------------------------------------------------------------------------------------------------------------------------------------------------------------------------------------------------------------------------------------------------------------------------------------------------------------------------------------------------------------------------------------------------------------------------------------------------------------------------------------------------------------------------------------------------------------------------------------------------------------------------------------------------------------------------------------------------------------------------------------------------------------------------------------------------------------------------------------------------------------------------------------------------------------------------------------------------------------------------------------------------------------------------------------------------------------------------------------------------------------------------------------------------------------------------------------------------------------------------------------------------------------------------------------------------------------------------------------------------------------------------------------------------------------------------------------------------------------------------------------------------------------------------------------------------------------------------------------------------------------------------------------------------------------------------------------------------------------------------------------------------------------------------------------------------------------------------------------------------------------------------------------------|
| Output times | {209.00000000000003, 209.02750000000003, 209.05500000000004, 209.08250000000004, 209.11000000000004, 209.13750000000002, 209.16500000000002, 209.19250000000002, 209.22000000000003, 209.24750000000003, 209.27500000000003, 209.30250000000004, 209.33000000000004, 209.35750000000002, 209.38500000000002, 209.41250000000002, 209.44000000000003, 209.46750000000003, 209.49500000000003, 209.52250000000004, 209.55000000000004, 209.57750000000001, 209.60500000000002, 209.63250000000002, 209.66000000000003, 209.68750000000003, 209.71500000000003, 209.74250000000004, 209.77000000000004, 209.79750000000004, 209.82500000000002, 209.85250000000002, 209.88000000000002, 209.90750000000003, 209.93500000000003, 209.96250000000003, 209.99000000000004, 210.01750000000004, 210.04500000000002, 210.07250000000002, 210.10000000000002, 210.12750000000003, 210.15500000000003, 210.18250000000003, 210.21000000000004, 210.23750000000004, 210.26500000000001, 210.29250000000002, 210.32000000000002, 210.34750000000003, 210.37500000000003, 210.40250000000003, 210.43000000000004, 210.45750000000004, 210.48500000000004, 210.51250000000002, 210.54000000000002, 210.56750000000002, 210.59500000000003, 210.62250000000003, 210.65000000000003, 210.67750000000004, 210.70500000000004, 210.73250000000002, 210.76000000000002, 210.78750000000002, 210.81500000000003, 210.84250000000003, 210.87000000000003, 210.89750000000004, 210.92500000000004, 210.95250000000001, 210.98000000000002, 211.00750000000002, 211.03500000000003, 211.06250000000003, 211.09000000000003, 211.11750000000004, 211.14500000000004, 211.17250000000004, 211.20000000000002, 211.22750000000002, 211.25500000000002, 211.28250000000003, 211.31000000000003, 211.33750000000003, 211.36500000000004, 211.39250000000004, 211.42000000000002, 211.44750000000002, 211.47500000000002, 211.50250000000003, 211.53000000000003} |

| Description | Value                                                                                                                                                                                                                                                                                                                                                                                                                                                                                                                                                                                                                                                                                                                                                                                                                                                                                                                                                                                                                                                                                                                                                                                                                                                                                                                                                                                                                                                                                                                                                                                                                                                                                                                                                                                                                                                                                                                                                                                                                                                                                                                                                                                                                                                                                                                                                                                                                                                                                                                                                                                                                                                                                                                                                                                                                                                                                                                                                                                           |
|-------------|-------------------------------------------------------------------------------------------------------------------------------------------------------------------------------------------------------------------------------------------------------------------------------------------------------------------------------------------------------------------------------------------------------------------------------------------------------------------------------------------------------------------------------------------------------------------------------------------------------------------------------------------------------------------------------------------------------------------------------------------------------------------------------------------------------------------------------------------------------------------------------------------------------------------------------------------------------------------------------------------------------------------------------------------------------------------------------------------------------------------------------------------------------------------------------------------------------------------------------------------------------------------------------------------------------------------------------------------------------------------------------------------------------------------------------------------------------------------------------------------------------------------------------------------------------------------------------------------------------------------------------------------------------------------------------------------------------------------------------------------------------------------------------------------------------------------------------------------------------------------------------------------------------------------------------------------------------------------------------------------------------------------------------------------------------------------------------------------------------------------------------------------------------------------------------------------------------------------------------------------------------------------------------------------------------------------------------------------------------------------------------------------------------------------------------------------------------------------------------------------------------------------------------------------------------------------------------------------------------------------------------------------------------------------------------------------------------------------------------------------------------------------------------------------------------------------------------------------------------------------------------------------------------------------------------------------------------------------------------------------------|
|             | 211.55750000000003, 211.58500000000004, 211.61250000000004, 211.64000000000004, 211.66750000000002, 211.69500000000002, 211.72250000000003, 211.75000000000003, 211.77750000000003, 211.80500000000004, 211.83250000000004, 211.86000000000004, 211.88750000000002, 211.91500000000002, 211.94250000000002, 211.97000000000003, 211.99750000000003, 212.02500000000003, 212.05250000000004, 212.08000000000004, 212.10750000000002, 212.13500000000002, 212.16250000000002, 212.19000000000003, 212.21750000000003, 212.24500000000003, 212.27250000000004, 212.30000000000004, 212.32750000000004, 212.35500000000002, 212.38250000000002, 212.41000000000003, 212.43750000000003, 212.46500000000003, 212.49250000000004, 212.52000000000004, 212.54750000000004, 212.57500000000002, 212.60250000000002, 212.63000000000002, 212.65750000000003, 212.68500000000003, 212.71250000000003, 212.74000000000004, 212.76750000000004, 212.79500000000002, 212.82250000000002, 212.85000000000002, 212.87750000000003, 212.90500000000003, 212.93250000000003, 212.96000000000004, 212.98750000000004, 213.01500000000004, 213.04250000000002, 213.07000000000002, 213.09750000000003, 213.12500000000003, 213.15250000000003, 213.18000000000004, 213.20750000000004, 213.23500000000004, 213.26250000000002, 213.29000000000002, 213.31750000000002, 213.34500000000003, 213.37250000000003, 213.40000000000003, 213.42750000000004, 213.45500000000004, 213.48250000000002, 213.51000000000002, 213.53750000000002, 213.56500000000003, 213.59250000000003, 213.62000000000003, 213.64750000000004, 213.67500000000004, 213.70250000000004, 213.73000000000002, 213.75750000000002, 213.78500000000003, 213.81250000000003, 213.84000000000003, 213.86750000000004, 213.89500000000004, 213.92250000000004, 213.95000000000002, 213.97750000000002, 214.00500000000002, 214.03250000000003, 214.06000000000003, 214.08750000000003, 214.11500000000004, 214.14250000000004, 214.17000000000002, 214.19750000000002, 214.22500000000002, 214.25250000000003, 214.28000000000003, 214.30750000000003, 214.33500000000004, 214.36250000000004, 214.39000000000004, 214.41750000000002, 214.44500000000002, 214.47250000000003, 214.50000000000003, 214.52750000000003, 214.55500000000004, 214.58250000000004, 214.61000000000004, 214.63750000000002, 214.66500000000002, 214.69250000000002, 214.72000000000003, 214.74750000000003, 214.77500000000003, 214.80250000000004, 214.83000000000004, 214.85750000000002, 214.88500000000002, 214.91250000000002, 214.94000000000003, 214.96750000000003, 214.99500000000003, 215.02250000000004, 215.05000000000004, 215.07750000000004, 215.10500000000002, 215.13250000000002, 215.16000000000003, 215.18750000000003, 215.21500000000003, 215.24250000000004, 215.27000000000004, 215.29750000000004, 215.32500000000002, 215.35250000000002, 215.38000000000002, 215.40750000000003, 215.43500000000003, 215.46250000000003, 215.49000000000004, |



| Description | Value                                                                                                                                                                                                                                                                                                                                                                                                                                                                                                                                                                                                                                                                                                                                                                                                                                                                                                                                                                                                                                                                                                                                                                                                                                                                                                                                                                                                                                                                                                                                                                                                                                                                                                                                                                                                                                                                                                                                                                                                                                                                                                                                                                                                                                                                                                                                                                                                                                                                                                                                                                                                                                                                                                                                                                                                                                                                                                                                                                                           |
|-------------|-------------------------------------------------------------------------------------------------------------------------------------------------------------------------------------------------------------------------------------------------------------------------------------------------------------------------------------------------------------------------------------------------------------------------------------------------------------------------------------------------------------------------------------------------------------------------------------------------------------------------------------------------------------------------------------------------------------------------------------------------------------------------------------------------------------------------------------------------------------------------------------------------------------------------------------------------------------------------------------------------------------------------------------------------------------------------------------------------------------------------------------------------------------------------------------------------------------------------------------------------------------------------------------------------------------------------------------------------------------------------------------------------------------------------------------------------------------------------------------------------------------------------------------------------------------------------------------------------------------------------------------------------------------------------------------------------------------------------------------------------------------------------------------------------------------------------------------------------------------------------------------------------------------------------------------------------------------------------------------------------------------------------------------------------------------------------------------------------------------------------------------------------------------------------------------------------------------------------------------------------------------------------------------------------------------------------------------------------------------------------------------------------------------------------------------------------------------------------------------------------------------------------------------------------------------------------------------------------------------------------------------------------------------------------------------------------------------------------------------------------------------------------------------------------------------------------------------------------------------------------------------------------------------------------------------------------------------------------------------------------|
|             | 215.51750000000004, 215.54500000000002, 215.57250000000002, 215.60000000000002, 215.62750000000003, 215.65500000000003, 215.68250000000003, 215.71000000000004, 215.73750000000004, 215.76500000000004, 215.79250000000002, 215.82000000000002, 215.84750000000003, 215.87500000000003, 215.90250000000003, 215.93000000000004, 215.95750000000004, 215.98500000000004, 216.01250000000002, 216.04000000000002, 216.06750000000002, 216.09500000000003, 216.12250000000003, 216.15000000000003, 216.17750000000004, 216.20500000000004, 216.23250000000002, 216.26000000000002, 216.28750000000002, 216.31500000000003, 216.34250000000003, 216.37000000000003, 216.39750000000004, 216.42500000000004, 216.45250000000004, 216.48000000000002, 216.50750000000002, 216.53500000000003, 216.56250000000003, 216.59000000000003, 216.61750000000004, 216.64500000000004, 216.67250000000004, 216.70000000000002, 216.72750000000002, 216.75500000000002, 216.78250000000003, 216.81000000000003, 216.83750000000003, 216.86500000000004, 216.89250000000004, 216.92000000000002, 216.94750000000002, 216.97500000000002, 217.00250000000003, 217.03000000000003, 217.05750000000003, 217.08500000000004, 217.11250000000004, 217.14000000000004, 217.16750000000002, 217.19500000000002, 217.22250000000003, 217.25000000000003, 217.27750000000003, 217.30500000000004, 217.33250000000004, 217.36000000000004, 217.38750000000002, 217.41500000000002, 217.44250000000002, 217.47000000000003, 217.49750000000003, 217.52500000000003, 217.55250000000004, 217.58000000000004, 217.60750000000002, 217.63500000000002, 217.66250000000002, 217.69000000000003, 217.71750000000003, 217.74500000000003, 217.77250000000004, 217.80000000000004, 217.82750000000004, 217.85500000000002, 217.88250000000002, 217.91000000000003, 217.93750000000003, 217.96500000000003, 217.99250000000004, 218.02000000000004, 218.04750000000004, 218.07500000000002, 218.10250000000002, 218.13000000000002, 218.15750000000003, 218.18500000000003, 218.21250000000003, 218.24000000000004, 218.26750000000004, 218.29500000000002, 218.32250000000002, 218.35000000000002, 218.37750000000003, 218.40500000000003, 218.43250000000003, 218.46000000000004, 218.48750000000004, 218.51500000000004, 218.54250000000002, 218.57000000000002, 218.59750000000003, 218.62500000000003, 218.65250000000003, 218.68000000000004, 218.70750000000004, 218.73500000000004, 218.76250000000002, 218.79000000000002, 218.81750000000002, 218.84500000000003, 218.87250000000003, 218.90000000000003, 218.92750000000004, 218.95500000000004, 218.98250000000002, 219.01000000000002, 219.03750000000002, 219.06500000000003, 219.09250000000003, 219.12000000000003, 219.14750000000004, 219.17500000000004, 219.20250000000004, 219.23000000000002, 219.25750000000002, 219.28500000000003, 219.31250000000003, 219.34000000000003, 219.36750000000004, 219.39500000000004, 219.42250000000004, 219.45000000000002, |

| Description | Value                                                                                                                                                                                                                                                                                                                                                                                                                                                                                                                                                                                                                                                                                                                                                                                                                                                                                                                                                                                                                                                                                                                                                                                                                                                                                                                                                                                                                                                                                                                                                                                                                                                                                                                                                                                                                                                                                                                                                                                                                                                                                                                                                                                                                                                                                                                                                                                                                                                                                                                                                                                                                                                                                                                                                                                                                                                                                                                                                                                           |
|-------------|-------------------------------------------------------------------------------------------------------------------------------------------------------------------------------------------------------------------------------------------------------------------------------------------------------------------------------------------------------------------------------------------------------------------------------------------------------------------------------------------------------------------------------------------------------------------------------------------------------------------------------------------------------------------------------------------------------------------------------------------------------------------------------------------------------------------------------------------------------------------------------------------------------------------------------------------------------------------------------------------------------------------------------------------------------------------------------------------------------------------------------------------------------------------------------------------------------------------------------------------------------------------------------------------------------------------------------------------------------------------------------------------------------------------------------------------------------------------------------------------------------------------------------------------------------------------------------------------------------------------------------------------------------------------------------------------------------------------------------------------------------------------------------------------------------------------------------------------------------------------------------------------------------------------------------------------------------------------------------------------------------------------------------------------------------------------------------------------------------------------------------------------------------------------------------------------------------------------------------------------------------------------------------------------------------------------------------------------------------------------------------------------------------------------------------------------------------------------------------------------------------------------------------------------------------------------------------------------------------------------------------------------------------------------------------------------------------------------------------------------------------------------------------------------------------------------------------------------------------------------------------------------------------------------------------------------------------------------------------------------------|
|             | 219.47750000000002, 219.50500000000002, 219.53250000000003, 219.56000000000003, 219.58750000000003, 219.61500000000004, 219.64250000000004, 219.67000000000002, 219.69750000000002, 219.72500000000002, 219.75250000000003, 219.78000000000003, 219.80750000000003, 219.83500000000004, 219.86250000000004, 219.89000000000004, 219.91750000000002, 219.94500000000002, 219.97250000000003, 220.00000000000003, 220.02750000000003, 220.05500000000004, 220.08250000000004, 220.11000000000004, 220.13750000000002, 220.16500000000002, 220.19250000000002, 220.22000000000003, 220.24750000000003, 220.27500000000003, 220.30250000000004, 220.33000000000004, 220.35750000000002, 220.38500000000002, 220.41250000000002, 220.44000000000003, 220.46750000000003, 220.49500000000003, 220.52250000000004, 220.55000000000004, 220.57750000000004, 220.60500000000002, 220.63250000000002, 220.66000000000003, 220.68750000000003, 220.71500000000003, 220.74250000000004, 220.77000000000004, 220.79750000000004, 220.82500000000002, 220.85250000000002, 220.88000000000002, 220.90750000000003, 220.93500000000003, 220.96250000000003, 220.99000000000004, 221.01750000000004, 221.04500000000002, 221.07250000000002, 221.10000000000002, 221.12750000000003, 221.15500000000003, 221.18250000000003, 221.21000000000004, 221.23750000000004, 221.26500000000004, 221.29250000000002, 221.32000000000002, 221.34750000000003, 221.37500000000003, 221.40250000000003, 221.43000000000004, 221.45750000000004, 221.48500000000004, 221.51250000000002, 221.54000000000002, 221.56750000000002, 221.59500000000003, 221.62250000000003, 221.65000000000003, 221.67750000000004, 221.70500000000004, 221.73250000000002, 221.76000000000002, 221.78750000000002, 221.81500000000003, 221.84250000000003, 221.87000000000003, 221.89750000000004, 221.92500000000004, 221.95250000000004, 221.98000000000002, 222.00750000000002, 222.03500000000003, 222.06250000000003, 222.09000000000003, 222.11750000000004, 222.14500000000004, 222.17250000000004, 222.20000000000002, 222.22750000000002, 222.25500000000002, 222.28250000000003, 222.31000000000003, 222.33750000000003, 222.36500000000004, 222.39250000000004, 222.42000000000002, 222.44750000000002, 222.47500000000002, 222.50250000000003, 222.53000000000003, 222.55750000000003, 222.58500000000004, 222.61250000000004, 222.64000000000004, 222.66750000000002, 222.69500000000002, 222.72250000000003, 222.75000000000003, 222.77750000000003, 222.80500000000004, 222.83250000000004, 222.86000000000004, 222.88750000000002, 222.91500000000002, 222.94250000000002, 222.97000000000003, 222.99750000000003, 223.02500000000003, 223.05250000000004, 223.08000000000004, 223.10750000000002, 223.13500000000002, 223.16250000000002, 223.19000000000003, 223.21750000000003, 223.24500000000003, 223.27250000000004, 223.30000000000004, 223.32750000000004, 223.35500000000002, 223.38250000000002, 223.41000000000003, |

| Description | Value                                                                                                                                                                                                                                                                                                                                                                                                                                                                                                                                                                                                                                                                                                                                                                                                                                                                                                                                                                                                                                                                                                                                                                                                                                                                                                                                                                                                                                                                                                                                                                                                                                                                                                                                                                                                                                                                                                                                                                                                                                                                                                                                                                                                                                                                                                                                                                                                                                                                                                                                                                                                                                                                                                                                                                                                                                                                                                                                                                                           |
|-------------|-------------------------------------------------------------------------------------------------------------------------------------------------------------------------------------------------------------------------------------------------------------------------------------------------------------------------------------------------------------------------------------------------------------------------------------------------------------------------------------------------------------------------------------------------------------------------------------------------------------------------------------------------------------------------------------------------------------------------------------------------------------------------------------------------------------------------------------------------------------------------------------------------------------------------------------------------------------------------------------------------------------------------------------------------------------------------------------------------------------------------------------------------------------------------------------------------------------------------------------------------------------------------------------------------------------------------------------------------------------------------------------------------------------------------------------------------------------------------------------------------------------------------------------------------------------------------------------------------------------------------------------------------------------------------------------------------------------------------------------------------------------------------------------------------------------------------------------------------------------------------------------------------------------------------------------------------------------------------------------------------------------------------------------------------------------------------------------------------------------------------------------------------------------------------------------------------------------------------------------------------------------------------------------------------------------------------------------------------------------------------------------------------------------------------------------------------------------------------------------------------------------------------------------------------------------------------------------------------------------------------------------------------------------------------------------------------------------------------------------------------------------------------------------------------------------------------------------------------------------------------------------------------------------------------------------------------------------------------------------------------|
|             | 223.43750000000003, 223.46500000000003, 223.49250000000004, 223.52000000000004, 223.54750000000004, 223.57500000000002, 223.60250000000002, 223.63000000000002, 223.65750000000003, 223.68500000000003, 223.71250000000003, 223.74000000000004, 223.76750000000004, 223.79500000000002, 223.82250000000002, 223.85000000000002, 223.87750000000003, 223.90500000000003, 223.93250000000003, 223.96000000000004, 223.98750000000004, 224.01500000000004, 224.04250000000002, 224.07000000000002, 224.09750000000003, 224.12500000000003, 224.15250000000003, 224.18000000000004, 224.20750000000004, 224.23500000000004, 224.26250000000005, 224.29000000000002, 224.31750000000002, 224.34500000000003, 224.37250000000003, 224.40000000000003, 224.42750000000004, 224.45500000000004, 224.48250000000002, 224.51000000000002, 224.53750000000002, 224.56500000000003, 224.59250000000003, 224.62000000000003, 224.64750000000004, 224.67500000000004, 224.70250000000004, 224.73000000000002, 224.75750000000002, 224.78500000000003, 224.81250000000003, 224.84000000000003, 224.86750000000004, 224.89500000000004, 224.92250000000004, 224.95000000000005, 224.97750000000002, 225.00500000000002, 225.03250000000003, 225.06000000000003, 225.08750000000003, 225.11500000000004, 225.14250000000004, 225.17000000000002, 225.19750000000002, 225.22500000000002, 225.25250000000003, 225.28000000000003, 225.30750000000003, 225.33500000000004, 225.36250000000004, 225.39000000000004, 225.41750000000002, 225.44500000000002, 225.47250000000003, 225.50000000000003, 225.52750000000003, 225.55500000000004, 225.58250000000004, 225.61000000000004, 225.63750000000005, 225.66500000000002, 225.69250000000002, 225.72000000000003, 225.74750000000003, 225.77500000000003, 225.80250000000004, 225.83000000000004, 225.85750000000002, 225.88500000000002, 225.91250000000002, 225.94000000000003, 225.96750000000003, 225.99500000000003, 226.02250000000004, 226.05000000000004, 226.07750000000004, 226.10500000000002, 226.13250000000002, 226.16000000000003, 226.18750000000003, 226.21500000000003, 226.24250000000004, 226.27000000000004, 226.29750000000004, 226.32500000000005, 226.35250000000002, 226.38000000000002, 226.40750000000003, 226.43500000000003, 226.46250000000003, 226.49000000000004, 226.51750000000004, 226.54500000000002, 226.57250000000002, 226.60000000000002, 226.62750000000003, 226.65500000000003, 226.68250000000003, 226.71000000000004, 226.73750000000004, 226.76500000000004, 226.79250000000002, 226.82000000000002, 226.84750000000003, 226.87500000000003, 226.90250000000003, 226.93000000000004, 226.95750000000004, 226.98500000000004, 227.01250000000005, 227.04000000000002, 227.06750000000002, 227.09500000000003, 227.12250000000003, 227.15000000000003, 227.17750000000004, 227.20500000000004, 227.23250000000002, 227.26000000000002, 227.28750000000002, 227.31500000000003, 227.34250000000003, 227.37000000000003, |

| Description | Value                                                                                                                                                                                                                                                                                                                                                                                                                                                                                                                                                                                                                                                                                                                                                                                                                                                                                                                                                                                                                                                                                                                                                                                                                                                                                                                                                                                                                                                                                                                                                                                                                                                                                                                                                                                                                                                                                                                                                                                                                                                                                                                                                                                                                                                                                                                                                                                                                                                                                                                                                                                                                                                                                                                                                                                                                                                                                                                                                                                           |
|-------------|-------------------------------------------------------------------------------------------------------------------------------------------------------------------------------------------------------------------------------------------------------------------------------------------------------------------------------------------------------------------------------------------------------------------------------------------------------------------------------------------------------------------------------------------------------------------------------------------------------------------------------------------------------------------------------------------------------------------------------------------------------------------------------------------------------------------------------------------------------------------------------------------------------------------------------------------------------------------------------------------------------------------------------------------------------------------------------------------------------------------------------------------------------------------------------------------------------------------------------------------------------------------------------------------------------------------------------------------------------------------------------------------------------------------------------------------------------------------------------------------------------------------------------------------------------------------------------------------------------------------------------------------------------------------------------------------------------------------------------------------------------------------------------------------------------------------------------------------------------------------------------------------------------------------------------------------------------------------------------------------------------------------------------------------------------------------------------------------------------------------------------------------------------------------------------------------------------------------------------------------------------------------------------------------------------------------------------------------------------------------------------------------------------------------------------------------------------------------------------------------------------------------------------------------------------------------------------------------------------------------------------------------------------------------------------------------------------------------------------------------------------------------------------------------------------------------------------------------------------------------------------------------------------------------------------------------------------------------------------------------------|
|             | 227.39750000000004, 227.42500000000004, 227.45250000000004, 227.48000000000002, 227.50750000000002, 227.53500000000003, 227.56250000000003, 227.59000000000003, 227.61750000000004, 227.64500000000004, 227.67250000000004, 227.70000000000005, 227.72750000000002, 227.75500000000002, 227.78250000000003, 227.81000000000003, 227.83750000000003, 227.86500000000004, 227.89250000000004, 227.92000000000002, 227.94750000000002, 227.97500000000002, 228.00250000000003, 228.03000000000003, 228.05750000000003, 228.08500000000004, 228.11250000000004, 228.14000000000004, 228.16750000000002, 228.19500000000002, 228.22250000000003, 228.25000000000003, 228.27750000000003, 228.30500000000004, 228.33250000000004, 228.36000000000004, 228.38750000000005, 228.41500000000002, 228.44250000000002, 228.47000000000003, 228.49750000000003, 228.52500000000003, 228.55250000000004, 228.58000000000004, 228.60750000000002, 228.63500000000002, 228.66250000000002, 228.69000000000003, 228.71750000000003, 228.74500000000003, 228.77250000000004, 228.80000000000004, 228.82750000000004, 228.85500000000002, 228.88250000000002, 228.91000000000003, 228.93750000000003, 228.96500000000003, 228.99250000000004, 229.02000000000004, 229.04750000000004, 229.07500000000005, 229.10250000000002, 229.13000000000002, 229.15750000000003, 229.18500000000003, 229.21250000000003, 229.24000000000004, 229.26750000000004, 229.29500000000002, 229.32250000000002, 229.35000000000002, 229.37750000000003, 229.40500000000003, 229.43250000000003, 229.46000000000004, 229.48750000000004, 229.51500000000004, 229.54250000000002, 229.57000000000002, 229.59750000000003, 229.62500000000003, 229.65250000000003, 229.68000000000004, 229.70750000000004, 229.73500000000004, 229.76250000000005, 229.79000000000002, 229.81750000000002, 229.84500000000003, 229.87250000000003, 229.90000000000003, 229.92750000000004, 229.95500000000004, 229.98250000000002, 230.01000000000002, 230.03750000000002, 230.06500000000003, 230.09250000000003, 230.12000000000003, 230.14750000000004, 230.17500000000004, 230.20250000000004, 230.23000000000002, 230.25750000000002, 230.28500000000003, 230.31250000000003, 230.34000000000003, 230.36750000000004, 230.39500000000004, 230.42250000000004, 230.45000000000005, 230.47750000000002, 230.50500000000002, 230.53250000000003, 230.56000000000003, 230.58750000000003, 230.61500000000004, 230.64250000000004, 230.67000000000002, 230.69750000000002, 230.72500000000002, 230.75250000000003, 230.78000000000003, 230.80750000000003, 230.83500000000004, 230.86250000000004, 230.89000000000004, 230.91750000000002, 230.94500000000002, 230.97250000000003, 231.00000000000003, 231.02750000000003, 231.05500000000004, 231.08250000000004, 231.11000000000004, 231.13750000000005, 231.16500000000002, 231.19250000000002, 231.22000000000003, 231.24750000000003, 231.27500000000003, 231.30250000000004, 231.33000000000004, |

| Description | Value                                                                                                                                                                                                                                                                                                                                                                                                                                                                                                                                                                                                                                                                                                                                                                                                                                                                                                                                                                                                                                                                                                                                                                                                                                                                                                                                                                                                                                                                                                                                                                                                                                                                                                                                                                                                                                                                                                                                                                                                                                                                                                                                                                                                                                                                                                                                                                                                                                                                                                                                                                                                                                                                                                                                                                                                                                                                                                                                                                                           |
|-------------|-------------------------------------------------------------------------------------------------------------------------------------------------------------------------------------------------------------------------------------------------------------------------------------------------------------------------------------------------------------------------------------------------------------------------------------------------------------------------------------------------------------------------------------------------------------------------------------------------------------------------------------------------------------------------------------------------------------------------------------------------------------------------------------------------------------------------------------------------------------------------------------------------------------------------------------------------------------------------------------------------------------------------------------------------------------------------------------------------------------------------------------------------------------------------------------------------------------------------------------------------------------------------------------------------------------------------------------------------------------------------------------------------------------------------------------------------------------------------------------------------------------------------------------------------------------------------------------------------------------------------------------------------------------------------------------------------------------------------------------------------------------------------------------------------------------------------------------------------------------------------------------------------------------------------------------------------------------------------------------------------------------------------------------------------------------------------------------------------------------------------------------------------------------------------------------------------------------------------------------------------------------------------------------------------------------------------------------------------------------------------------------------------------------------------------------------------------------------------------------------------------------------------------------------------------------------------------------------------------------------------------------------------------------------------------------------------------------------------------------------------------------------------------------------------------------------------------------------------------------------------------------------------------------------------------------------------------------------------------------------------|
|             | 231.35750000000002, 231.38500000000002, 231.41250000000002, 231.44000000000003, 231.46750000000003, 231.49500000000003, 231.52250000000004, 231.55000000000004, 231.57750000000004, 231.60500000000002, 231.63250000000002, 231.66000000000003, 231.68750000000003, 231.71500000000003, 231.74250000000004, 231.77000000000004, 231.79750000000004, 231.82500000000005, 231.85250000000002, 231.88000000000002, 231.90750000000003, 231.93500000000003, 231.96250000000003, 231.99000000000004, 232.01750000000004, 232.04500000000002, 232.07250000000002, 232.10000000000002, 232.12750000000003, 232.15500000000003, 232.18250000000003, 232.21000000000004, 232.23750000000004, 232.26500000000004, 232.29250000000002, 232.32000000000002, 232.34750000000003, 232.37500000000003, 232.40250000000003, 232.43000000000004, 232.45750000000004, 232.48500000000004, 232.51250000000005, 232.54000000000002, 232.56750000000002, 232.59500000000003, 232.62250000000003, 232.65000000000003, 232.67750000000004, 232.70500000000004, 232.73250000000002, 232.76000000000002, 232.78750000000002, 232.81500000000003, 232.84250000000003, 232.87000000000003, 232.89750000000004, 232.92500000000004, 232.95250000000004, 232.98000000000002, 233.00750000000002, 233.03500000000003, 233.06250000000003, 233.09000000000003, 233.11750000000004, 233.14500000000004, 233.17250000000004, 233.20000000000005, 233.22750000000002, 233.25500000000002, 233.28250000000003, 233.31000000000003, 233.33750000000003, 233.36500000000004, 233.39250000000004, 233.42000000000002, 233.44750000000002, 233.47500000000002, 233.50250000000003, 233.53000000000003, 233.55750000000003, 233.58500000000004, 233.61250000000004, 233.64000000000004, 233.66750000000002, 233.69500000000002, 233.72250000000003, 233.75000000000003, 233.77750000000003, 233.80500000000004, 233.83250000000004, 233.86000000000004, 233.88750000000005, 233.91500000000002, 233.94250000000002, 233.97000000000003, 233.99750000000003, 234.02500000000003, 234.05250000000004, 234.08000000000004, 234.10750000000002, 234.13500000000002, 234.16250000000002, 234.19000000000003, 234.21750000000003, 234.24500000000003, 234.27250000000004, 234.30000000000004, 234.32750000000004, 234.35500000000002, 234.38250000000002, 234.41000000000003, 234.43750000000003, 234.46500000000003, 234.49250000000004, 234.52000000000004, 234.54750000000004, 234.57500000000005, 234.60250000000002, 234.63000000000002, 234.65750000000003, 234.68500000000003, 234.71250000000003, 234.74000000000004, 234.76750000000004, 234.79500000000002, 234.82250000000005, 234.85000000000002, 234.87750000000003, 234.90500000000003, 234.93250000000003, 234.96000000000004, 234.98750000000004, 235.01500000000004, 235.04250000000002, 235.07000000000002, 235.09750000000003, 235.12500000000003, 235.15250000000003, 235.18000000000004, 235.20750000000004, 235.23500000000004, 235.26250000000005, 235.29000000000002, |

| Description | Value                                                                                                                                                                                                                                                                                                                                                                                                                                                                                                                                                                                                                                                                                                                                                                                                                                                                                                                                                                                                                                                                                                                                                                                                                                                                                                                                                                                                                                                                                                                                                                                                                                                                                                                                                                                                                                                                                                                                                                                                                                                                                                                                                                                                                                                                                                                                                                                                                                                                                                                                                                                                                                                                                                                                                                                                                                                                                                                                                                                                                                                                                                                                        |
|-------------|----------------------------------------------------------------------------------------------------------------------------------------------------------------------------------------------------------------------------------------------------------------------------------------------------------------------------------------------------------------------------------------------------------------------------------------------------------------------------------------------------------------------------------------------------------------------------------------------------------------------------------------------------------------------------------------------------------------------------------------------------------------------------------------------------------------------------------------------------------------------------------------------------------------------------------------------------------------------------------------------------------------------------------------------------------------------------------------------------------------------------------------------------------------------------------------------------------------------------------------------------------------------------------------------------------------------------------------------------------------------------------------------------------------------------------------------------------------------------------------------------------------------------------------------------------------------------------------------------------------------------------------------------------------------------------------------------------------------------------------------------------------------------------------------------------------------------------------------------------------------------------------------------------------------------------------------------------------------------------------------------------------------------------------------------------------------------------------------------------------------------------------------------------------------------------------------------------------------------------------------------------------------------------------------------------------------------------------------------------------------------------------------------------------------------------------------------------------------------------------------------------------------------------------------------------------------------------------------------------------------------------------------------------------------------------------------------------------------------------------------------------------------------------------------------------------------------------------------------------------------------------------------------------------------------------------------------------------------------------------------------------------------------------------------------------------------------------------------------------------------------------------------|
|             | 235.31750000000002, 235.34500000000003, 235.37250000000003,<br>235.40000000000003, 235.42750000000004, 235.45500000000004,<br>235.48250000000002, 235.51000000000005, 235.53750000000002,<br>235.56500000000003, 235.59250000000003, 235.62000000000003,<br>235.64750000000004, 235.67500000000004, 235.70250000000004,<br>235.73000000000002, 235.75750000000002, 235.78500000000003,<br>235.81250000000003, 235.84000000000003, 235.86750000000004,<br>235.89500000000004, 235.92250000000004, 235.95000000000005,<br>235.97750000000002, 236.00500000000002, 236.03250000000003,<br>236.06000000000003, 236.08750000000003, 236.11500000000004,<br>236.14250000000004, 236.17000000000004, 236.19750000000005,<br>236.22500000000002, 236.25250000000003, 236.28000000000003,<br>236.30750000000003, 236.33500000000004, 236.36250000000004,<br>236.39000000000004, 236.41750000000002, 236.44500000000002,<br>236.47250000000003, 236.50000000000003, 236.52750000000003,<br>236.55500000000004, 236.58250000000004, 236.61000000000004,<br>236.63750000000005, 236.66500000000002, 236.69250000000002,<br>236.72000000000003, 236.74750000000003, 236.77500000000003,<br>236.80250000000004, 236.83000000000004, 236.85750000000004,<br>236.88500000000005, 236.91250000000002, 236.94000000000003,<br>236.96750000000003, 236.99500000000003, 237.02250000000004,<br>237.05000000000004, 237.07750000000004, 237.10500000000002,<br>237.13250000000002, 237.16000000000003, 237.18750000000003,<br>237.21500000000003, 237.24250000000004, 237.27000000000004,<br>237.29750000000004, 237.32500000000005, 237.35250000000002,<br>237.38000000000002, 237.40750000000003, 237.43500000000003,<br>237.46250000000003, 237.49000000000004, 237.51750000000004,<br>237.54500000000004, 237.57250000000005, 237.60000000000002,<br>237.62750000000003, 237.65500000000003, 237.68250000000003,<br>237.71000000000004, 237.73750000000004, 237.76500000000004,<br>237.79250000000002, 237.82000000000002, 237.84750000000003,<br>237.87500000000003, 237.90250000000003, 237.93000000000004,<br>237.95750000000004, 237.98500000000004, 238.01250000000005,<br>238.04000000000002, 238.06750000000002, 238.09500000000003,<br>238.12250000000003, 238.15000000000003, 238.17750000000004,<br>238.20500000000004, 238.23250000000004, 238.26000000000005,<br>238.28750000000002, 238.31500000000003, 238.34250000000003,<br>238.37000000000003, 238.39750000000004, 238.42500000000004,<br>238.45250000000004, 238.48000000000002, 238.50750000000002,<br>238.53500000000003, 238.56250000000003, 238.59000000000003,<br>238.61750000000004, 238.64500000000004, 238.67250000000004,<br>238.70000000000005, 238.72750000000002, 238.75500000000002,<br>238.78250000000003, 238.81000000000003, 238.83750000000003,<br>238.86500000000004, 238.89250000000004, 238.92000000000004,<br>238.94750000000005, 238.97500000000002, 239.00250000000003,<br>239.03000000000003, 239.05750000000003, 239.08500000000004,<br>239.11250000000004, 239.14000000000004, 239.16750000000002,<br>239.19500000000002, 239.22250000000003, 239.25000000000003, |

| Description | Value                                                                                                                                                                                                                                                                                                                                                                                                                                                                                                                                                                                                                                                                                                                                                                                                                                                                                                                                                                                                                                                                                                                                                                                                                                                                                                                                                                                                                                                                                                                                                                                                                                                                                                                                                                                                                                                                                                                                                                                                                                                                                                                                                                              |
|-------------|------------------------------------------------------------------------------------------------------------------------------------------------------------------------------------------------------------------------------------------------------------------------------------------------------------------------------------------------------------------------------------------------------------------------------------------------------------------------------------------------------------------------------------------------------------------------------------------------------------------------------------------------------------------------------------------------------------------------------------------------------------------------------------------------------------------------------------------------------------------------------------------------------------------------------------------------------------------------------------------------------------------------------------------------------------------------------------------------------------------------------------------------------------------------------------------------------------------------------------------------------------------------------------------------------------------------------------------------------------------------------------------------------------------------------------------------------------------------------------------------------------------------------------------------------------------------------------------------------------------------------------------------------------------------------------------------------------------------------------------------------------------------------------------------------------------------------------------------------------------------------------------------------------------------------------------------------------------------------------------------------------------------------------------------------------------------------------------------------------------------------------------------------------------------------------|
|             | 239.27750000000003, 239.30500000000004, 239.33250000000004,<br>239.36000000000004, 239.38750000000005, 239.41500000000002,<br>239.44250000000002, 239.47000000000003, 239.49750000000003,<br>239.52500000000003, 239.55250000000004, 239.58000000000004,<br>239.60750000000004, 239.63500000000005, 239.66250000000002,<br>239.69000000000003, 239.71750000000003, 239.74500000000003,<br>239.77250000000004, 239.80000000000004, 239.82750000000004,<br>239.85500000000002, 239.88250000000002, 239.91000000000003,<br>239.93750000000003, 239.96500000000003, 239.99250000000004,<br>240.02000000000004, 240.04750000000004, 240.07500000000005,<br>240.10250000000002, 240.13000000000002, 240.15750000000003,<br>240.18500000000003, 240.21250000000003, 240.24000000000004,<br>240.26750000000004, 240.29500000000004, 240.32250000000005,<br>240.35000000000002, 240.37750000000003, 240.40500000000003,<br>240.43250000000003, 240.46000000000004, 240.48750000000004,<br>240.51500000000004, 240.54250000000002, 240.57000000000002,<br>240.59750000000003, 240.62500000000003, 240.65250000000003,<br>240.68000000000004, 240.70750000000004, 240.73500000000004,<br>240.76250000000005, 240.79000000000002, 240.81750000000002,<br>240.84500000000003, 240.87250000000003, 240.90000000000003,<br>240.92750000000004, 240.95500000000004, 240.98250000000004,<br>241.01000000000005, 241.03750000000002, 241.06500000000003,<br>241.09250000000003, 241.12000000000003, 241.14750000000004,<br>241.17500000000004, 241.20250000000004, 241.23000000000002,<br>241.25750000000005, 241.28500000000003, 241.31250000000003,<br>241.34000000000003, 241.36750000000004, 241.39500000000004,<br>241.42250000000004, 241.45000000000005, 241.47750000000002,<br>241.50500000000002, 241.53250000000003, 241.56000000000003,<br>241.58750000000003, 241.61500000000004, 241.64250000000004,<br>241.67000000000002, 241.69750000000005, 241.72500000000002,<br>241.75250000000003, 241.78000000000003, 241.80750000000003,<br>241.83500000000004, 241.86250000000004, 241.89000000000004,<br>241.91750000000002, 241.94500000000005, 241.97250000000003,<br>242.00000000000003} |

#### VALUES OF DEPENDENT VARIABLES

| Description | Value                                 |
|-------------|---------------------------------------|
| Settings    | User controlled                       |
| Method      | Solution                              |
| Study       | <a href="#">Study 4 (CV 31 to 38)</a> |
| Settings    | User controlled                       |
| Method      | Solution                              |
| Study       | <a href="#">Study 4 (CV 31 to 38)</a> |

#### MESH

| Feature    | Value |
|------------|-------|
| Geometry 1 | mesh1 |

#### PHYSICS AND VARIABLES SELECTION

| Physics interface                             | Discretization |
|-----------------------------------------------|----------------|
| Transport of Diluted Species in droplet (tds) | physics        |
| Moving Mesh (ale)                             | physics        |

#### MESH SELECTION

| Geometry           | Mesh  |
|--------------------|-------|
| Geometry 1 (geom1) | mesh1 |

## 7.2 SOLVER CONFIGURATIONS

### 7.2.1 Solution 10

#### Compile Equations: Time Dependent (st1)

##### STUDY AND STEP

| Description    | Value                                 |
|----------------|---------------------------------------|
| Use study      | <a href="#">Study 5 (CV 39 to 44)</a> |
| Use study step | <a href="#">Time Dependent</a>        |

##### LOG

```
<---- Compile Equations: Time Dependent in Study 5 (CV 39 to 44)/Solution 10
(sol10) -----
Started at Jun 2, 2023 10:22:24 AM.
Time: 0 s.
Physical memory: 3.36 GB
Virtual memory: 3.21 GB
Ended at Jun 2, 2023 10:22:25 AM.
----- Compile Equations: Time Dependent in Study 5 (CV 39 to 44)/Solution 10
(sol10) ----->
```

#### Dependent Variables 1 (v1)

##### GENERAL

| Description           | Value                          |
|-----------------------|--------------------------------|
| Defined by study step | <a href="#">Time Dependent</a> |

##### INITIAL VALUES OF VARIABLES SOLVED FOR

| Description | Value                               |
|-------------|-------------------------------------|
| Method      | Solution                            |
| Solution    | <a href="#">Remeshed Solution 4</a> |



## RESIDUAL SCALING

| Description | Value  |
|-------------|--------|
| Method      | Manual |

## VALUES OF VARIABLES NOT SOLVED FOR

| Description | Value                               |
|-------------|-------------------------------------|
| Method      | Solution                            |
| Solution    | <a href="#">Remeshed Solution 4</a> |

## INITIAL VALUE CALCULATION CONSTANTS

| Constant name | Initial value source                |
|---------------|-------------------------------------|
| t             | range(38*t_cv,t_tot/nb/200,44*t_cv) |
| timestep      | 0.033[s]                            |

## LOG

```
<---- Dependent Variables 1 in Study 5 (CV 39 to 43)/Solution 10 (sol10) -----  
Started at May 31, 2023 9:33:23 PM.  
Initial values of variables solved for: Remeshed Solution 4 (sol9), t=209 s [Last].  
Values of variables not solved for: Remeshed Solution 4 (sol9), t=209 s [Last].  
Solution time: 1 s.  
Physical memory: 2.06 GB  
Virtual memory: 2.21 GB  
Ended at May 31, 2023 9:33:24 PM.  
----- Dependent Variables 1 in Study 5 (CV 39 to 43)/Solution 10 (sol10) ----->
```

### Concentration (comp1.cOx) (comp1\_cOx)

#### GENERAL

| Description        | Value                              |
|--------------------|------------------------------------|
| Field components   | comp1.cOx                          |
| Internal variables | {comp1.uflux.cOx, comp1.dflux.cOx} |

### Concentration (comp1.cRed) (comp1\_cRed)

#### GENERAL

| Description        | Value                                |
|--------------------|--------------------------------------|
| Field components   | comp1.cRed                           |
| Internal variables | {comp1.uflux.cRed, comp1.dflux.cRed} |

### comp1.comp1.RgZg (comp1\_comp1\_RgZg)

#### GENERAL

| Description          | Value    |
|----------------------|----------|
| Field components     | {Rg, Zg} |
| Solve for this field | Off      |

**Spatial mesh displacement (comp1.spatial.disp) (comp1\_spatial\_disp)**

GENERAL

| Description      | Value                              |
|------------------|------------------------------------|
| Field components | {comp1.spatial.u, comp1.spatial.w} |

SCALING

| Description | Value               |
|-------------|---------------------|
| Method      | Manual              |
| Scale       | 6.86772451398569E-8 |

**Time-Dependent Solver 1 (t1)**

GENERAL

| Description           | Value                                                                                                                                                                                                                                                                                                                                                                                                                                                                                                                                                                                                                                                                                                                                                                                                                                                                                                                                                                                                                                                                                                                                                                                                                                                                                                                                                                                                                                                                                                                                                                                                                                                                                                                                                                                                                                                                                                                                |
|-----------------------|--------------------------------------------------------------------------------------------------------------------------------------------------------------------------------------------------------------------------------------------------------------------------------------------------------------------------------------------------------------------------------------------------------------------------------------------------------------------------------------------------------------------------------------------------------------------------------------------------------------------------------------------------------------------------------------------------------------------------------------------------------------------------------------------------------------------------------------------------------------------------------------------------------------------------------------------------------------------------------------------------------------------------------------------------------------------------------------------------------------------------------------------------------------------------------------------------------------------------------------------------------------------------------------------------------------------------------------------------------------------------------------------------------------------------------------------------------------------------------------------------------------------------------------------------------------------------------------------------------------------------------------------------------------------------------------------------------------------------------------------------------------------------------------------------------------------------------------------------------------------------------------------------------------------------------------|
| Defined by study step | <a href="#">Time Dependent</a>                                                                                                                                                                                                                                                                                                                                                                                                                                                                                                                                                                                                                                                                                                                                                                                                                                                                                                                                                                                                                                                                                                                                                                                                                                                                                                                                                                                                                                                                                                                                                                                                                                                                                                                                                                                                                                                                                                       |
| Output times          | {209.00000000000003, 209.02750000000003, 209.05500000000004, 209.08250000000004, 209.11000000000004, 209.13750000000002, 209.16500000000002, 209.19250000000002, 209.22000000000003, 209.24750000000003, 209.27500000000003, 209.30250000000004, 209.33000000000004, 209.35750000000002, 209.38500000000002, 209.41250000000002, 209.44000000000003, 209.46750000000003, 209.49500000000003, 209.52250000000004, 209.55000000000004, 209.57750000000001, 209.60500000000002, 209.63250000000002, 209.66000000000003, 209.68750000000003, 209.71500000000003, 209.74250000000004, 209.77000000000004, 209.79750000000004, 209.82500000000002, 209.85250000000002, 209.88000000000002, 209.90750000000003, 209.93500000000003, 209.96250000000003, 209.99000000000004, 210.01750000000004, 210.04500000000002, 210.07250000000002, 210.10000000000002, 210.12750000000003, 210.15500000000003, 210.18250000000003, 210.21000000000004, 210.23750000000004, 210.26500000000001, 210.29250000000002, 210.32000000000002, 210.34750000000003, 210.37500000000003, 210.40250000000003, 210.43000000000004, 210.45750000000004, 210.48500000000004, 210.51250000000002, 210.54000000000002, 210.56750000000002, 210.59500000000003, 210.62250000000003, 210.65000000000003, 210.67750000000004, 210.70500000000004, 210.73250000000002, 210.76000000000002, 210.78750000000002, 210.81500000000003, 210.84250000000003, 210.87000000000003, 210.89750000000004, 210.92500000000004, 210.95250000000001, 210.98000000000002, 211.00750000000002, 211.03500000000003, 211.06250000000003, 211.09000000000003, 211.11750000000004, 211.14500000000004, 211.17250000000004, 211.20000000000002, 211.22750000000002, 211.25500000000002, 211.28250000000003, 211.31000000000003, 211.33750000000003, 211.36500000000004, 211.39250000000004, 211.42000000000002, 211.44750000000002, 211.47500000000002, 211.50250000000003, 211.53000000000003} |

| Description | Value                                                                                                                                                                                                                                                                                                                                                                                                                                                                                                                                                                                                                                                                                                                                                                                                                                                                                                                                                                                                                                                                                                                                                                                                                                                                                                                                                                                                                                                                                                                                                                                                                                                                                                                                                                                                                                                                                                                                                                                                                                                                                                                                                                                                                                                                                                                                                                                                                                                                                                                                                                                                                                                                                                                                                                                                                                                                                                                                                                                                                                                                                                                                        |
|-------------|----------------------------------------------------------------------------------------------------------------------------------------------------------------------------------------------------------------------------------------------------------------------------------------------------------------------------------------------------------------------------------------------------------------------------------------------------------------------------------------------------------------------------------------------------------------------------------------------------------------------------------------------------------------------------------------------------------------------------------------------------------------------------------------------------------------------------------------------------------------------------------------------------------------------------------------------------------------------------------------------------------------------------------------------------------------------------------------------------------------------------------------------------------------------------------------------------------------------------------------------------------------------------------------------------------------------------------------------------------------------------------------------------------------------------------------------------------------------------------------------------------------------------------------------------------------------------------------------------------------------------------------------------------------------------------------------------------------------------------------------------------------------------------------------------------------------------------------------------------------------------------------------------------------------------------------------------------------------------------------------------------------------------------------------------------------------------------------------------------------------------------------------------------------------------------------------------------------------------------------------------------------------------------------------------------------------------------------------------------------------------------------------------------------------------------------------------------------------------------------------------------------------------------------------------------------------------------------------------------------------------------------------------------------------------------------------------------------------------------------------------------------------------------------------------------------------------------------------------------------------------------------------------------------------------------------------------------------------------------------------------------------------------------------------------------------------------------------------------------------------------------------------|
|             | 211.55750000000003, 211.58500000000004, 211.61250000000004,<br>211.64000000000004, 211.66750000000002, 211.69500000000002,<br>211.72250000000003, 211.75000000000003, 211.77750000000003,<br>211.80500000000004, 211.83250000000004, 211.86000000000004,<br>211.88750000000002, 211.91500000000002, 211.94250000000002,<br>211.97000000000003, 211.99750000000003, 212.02500000000003,<br>212.05250000000004, 212.08000000000004, 212.10750000000002,<br>212.13500000000002, 212.16250000000002, 212.19000000000003,<br>212.21750000000003, 212.24500000000003, 212.27250000000004,<br>212.30000000000004, 212.32750000000004, 212.35500000000002,<br>212.38250000000002, 212.41000000000003, 212.43750000000003,<br>212.46500000000003, 212.49250000000004, 212.52000000000004,<br>212.54750000000004, 212.57500000000002, 212.60250000000002,<br>212.63000000000002, 212.65750000000003, 212.68500000000003,<br>212.71250000000003, 212.74000000000004, 212.76750000000004,<br>212.79500000000002, 212.82250000000002, 212.85000000000002,<br>212.87750000000003, 212.90500000000003, 212.93250000000003,<br>212.96000000000004, 212.98750000000004, 213.01500000000004,<br>213.04250000000002, 213.07000000000002, 213.09750000000003,<br>213.12500000000003, 213.15250000000003, 213.18000000000004,<br>213.20750000000004, 213.23500000000004, 213.26250000000002,<br>213.29000000000002, 213.31750000000002, 213.34500000000003,<br>213.37250000000003, 213.40000000000003, 213.42750000000004,<br>213.45500000000004, 213.48250000000002, 213.51000000000002,<br>213.53750000000002, 213.56500000000003, 213.59250000000003,<br>213.62000000000003, 213.64750000000004, 213.67500000000004,<br>213.70250000000004, 213.73000000000002, 213.75750000000002,<br>213.78500000000003, 213.81250000000003, 213.84000000000003,<br>213.86750000000004, 213.89500000000004, 213.92250000000004,<br>213.95000000000002, 213.97750000000002, 214.00500000000002,<br>214.03250000000003, 214.06000000000003, 214.08750000000003,<br>214.11500000000004, 214.14250000000004, 214.17000000000002,<br>214.19750000000002, 214.22500000000002, 214.25250000000003,<br>214.28000000000003, 214.30750000000003, 214.33500000000004,<br>214.36250000000004, 214.39000000000004, 214.41750000000002,<br>214.44500000000002, 214.47250000000003, 214.50000000000003,<br>214.52750000000003, 214.55500000000004, 214.58250000000004,<br>214.61000000000004, 214.63750000000002, 214.66500000000002,<br>214.69250000000002, 214.72000000000003, 214.74750000000003,<br>214.77500000000003, 214.80250000000004, 214.83000000000004,<br>214.85750000000002, 214.88500000000002, 214.91250000000002,<br>214.94000000000003, 214.96750000000003, 214.99500000000003,<br>215.02250000000004, 215.05000000000004, 215.07750000000004,<br>215.10500000000002, 215.13250000000002, 215.16000000000003,<br>215.18750000000003, 215.21500000000003, 215.24250000000004,<br>215.27000000000004, 215.29750000000004, 215.32500000000002,<br>215.35250000000002, 215.38000000000002, 215.40750000000003,<br>215.43500000000003, 215.46250000000003, 215.49000000000004, |

| Description | Value                                                                                                                                                                                                                                                                                                                                                                                                                                                                                                                                                                                                                                                                                                                                                                                                                                                                                                                                                                                                                                                                                                                                                                                                                                                                                                                                                                                                                                                                                                                                                                                                                                                                                                                                                                                                                                                                                                                                                                                                                                                                                                                                                                                                                                                                                                                                                                                                                                                                                                                                                                                                                                                                                                                                                                                                                                                                                                                                                                                                                                                                                                                                        |
|-------------|----------------------------------------------------------------------------------------------------------------------------------------------------------------------------------------------------------------------------------------------------------------------------------------------------------------------------------------------------------------------------------------------------------------------------------------------------------------------------------------------------------------------------------------------------------------------------------------------------------------------------------------------------------------------------------------------------------------------------------------------------------------------------------------------------------------------------------------------------------------------------------------------------------------------------------------------------------------------------------------------------------------------------------------------------------------------------------------------------------------------------------------------------------------------------------------------------------------------------------------------------------------------------------------------------------------------------------------------------------------------------------------------------------------------------------------------------------------------------------------------------------------------------------------------------------------------------------------------------------------------------------------------------------------------------------------------------------------------------------------------------------------------------------------------------------------------------------------------------------------------------------------------------------------------------------------------------------------------------------------------------------------------------------------------------------------------------------------------------------------------------------------------------------------------------------------------------------------------------------------------------------------------------------------------------------------------------------------------------------------------------------------------------------------------------------------------------------------------------------------------------------------------------------------------------------------------------------------------------------------------------------------------------------------------------------------------------------------------------------------------------------------------------------------------------------------------------------------------------------------------------------------------------------------------------------------------------------------------------------------------------------------------------------------------------------------------------------------------------------------------------------------------|
|             | 215.51750000000004, 215.54500000000002, 215.57250000000002,<br>215.60000000000002, 215.62750000000003, 215.65500000000003,<br>215.68250000000003, 215.71000000000004, 215.73750000000004,<br>215.76500000000004, 215.79250000000002, 215.82000000000002,<br>215.84750000000003, 215.87500000000003, 215.90250000000003,<br>215.93000000000004, 215.95750000000004, 215.98500000000004,<br>216.01250000000002, 216.04000000000002, 216.06750000000002,<br>216.09500000000003, 216.12250000000003, 216.15000000000003,<br>216.17750000000004, 216.20500000000004, 216.23250000000002,<br>216.26000000000002, 216.28750000000002, 216.31500000000003,<br>216.34250000000003, 216.37000000000003, 216.39750000000004,<br>216.42500000000004, 216.45250000000004, 216.48000000000002,<br>216.50750000000002, 216.53500000000003, 216.56250000000003,<br>216.59000000000003, 216.61750000000004, 216.64500000000004,<br>216.67250000000004, 216.70000000000002, 216.72750000000002,<br>216.75500000000002, 216.78250000000003, 216.81000000000003,<br>216.83750000000003, 216.86500000000004, 216.89250000000004,<br>216.92000000000002, 216.94750000000002, 216.97500000000002,<br>217.00250000000003, 217.03000000000003, 217.05750000000003,<br>217.08500000000004, 217.11250000000004, 217.14000000000004,<br>217.16750000000002, 217.19500000000002, 217.22250000000003,<br>217.25000000000003, 217.27750000000003, 217.30500000000004,<br>217.33250000000004, 217.36000000000004, 217.38750000000002,<br>217.41500000000002, 217.44250000000002, 217.47000000000003,<br>217.49750000000003, 217.52500000000003, 217.55250000000004,<br>217.58000000000004, 217.60750000000002, 217.63500000000002,<br>217.66250000000002, 217.69000000000003, 217.71750000000003,<br>217.74500000000003, 217.77250000000004, 217.80000000000004,<br>217.82750000000004, 217.85500000000002, 217.88250000000002,<br>217.91000000000003, 217.93750000000003, 217.96500000000003,<br>217.99250000000004, 218.02000000000004, 218.04750000000004,<br>218.07500000000002, 218.10250000000002, 218.13000000000002,<br>218.15750000000003, 218.18500000000003, 218.21250000000003,<br>218.24000000000004, 218.26750000000004, 218.29500000000002,<br>218.32250000000002, 218.35000000000002, 218.37750000000003,<br>218.40500000000003, 218.43250000000003, 218.46000000000004,<br>218.48750000000004, 218.51500000000004, 218.54250000000002,<br>218.57000000000002, 218.59750000000003, 218.62500000000003,<br>218.65250000000003, 218.68000000000004, 218.70750000000004,<br>218.73500000000004, 218.76250000000002, 218.79000000000002,<br>218.81750000000002, 218.84500000000003, 218.87250000000003,<br>218.90000000000003, 218.92750000000004, 218.95500000000004,<br>218.98250000000002, 219.01000000000002, 219.03750000000002,<br>219.06500000000003, 219.09250000000003, 219.12000000000003,<br>219.14750000000004, 219.17500000000004, 219.20250000000004,<br>219.23000000000002, 219.25750000000002, 219.28500000000003,<br>219.31250000000003, 219.34000000000003, 219.36750000000004,<br>219.39500000000004, 219.42250000000004, 219.45000000000002, |

| Description | Value                                                                                                                                                                                                                                                                                                                                                                                                                                                                                                                                                                                                                                                                                                                                                                                                                                                                                                                                                                                                                                                                                                                                                                                                                                                                                                                                                                                                                                                                                                                                                                                                                                                                                                                                                                                                                                                                                                                                                                                                                                                                                                                                                                                                                                                                                                                                                                                                                                                                                                                                                                                                                                                                                                                                                                                                                                                                                                                                                                                                                                                                                                                                        |
|-------------|----------------------------------------------------------------------------------------------------------------------------------------------------------------------------------------------------------------------------------------------------------------------------------------------------------------------------------------------------------------------------------------------------------------------------------------------------------------------------------------------------------------------------------------------------------------------------------------------------------------------------------------------------------------------------------------------------------------------------------------------------------------------------------------------------------------------------------------------------------------------------------------------------------------------------------------------------------------------------------------------------------------------------------------------------------------------------------------------------------------------------------------------------------------------------------------------------------------------------------------------------------------------------------------------------------------------------------------------------------------------------------------------------------------------------------------------------------------------------------------------------------------------------------------------------------------------------------------------------------------------------------------------------------------------------------------------------------------------------------------------------------------------------------------------------------------------------------------------------------------------------------------------------------------------------------------------------------------------------------------------------------------------------------------------------------------------------------------------------------------------------------------------------------------------------------------------------------------------------------------------------------------------------------------------------------------------------------------------------------------------------------------------------------------------------------------------------------------------------------------------------------------------------------------------------------------------------------------------------------------------------------------------------------------------------------------------------------------------------------------------------------------------------------------------------------------------------------------------------------------------------------------------------------------------------------------------------------------------------------------------------------------------------------------------------------------------------------------------------------------------------------------------|
|             | 219.47750000000002, 219.50500000000002, 219.53250000000003,<br>219.56000000000003, 219.58750000000003, 219.61500000000004,<br>219.64250000000004, 219.67000000000002, 219.69750000000002,<br>219.72500000000002, 219.75250000000003, 219.78000000000003,<br>219.80750000000003, 219.83500000000004, 219.86250000000004,<br>219.89000000000004, 219.91750000000002, 219.94500000000002,<br>219.97250000000003, 220.00000000000003, 220.02750000000003,<br>220.05500000000004, 220.08250000000004, 220.11000000000004,<br>220.13750000000002, 220.16500000000002, 220.19250000000002,<br>220.22000000000003, 220.24750000000003, 220.27500000000003,<br>220.30250000000004, 220.33000000000004, 220.35750000000002,<br>220.38500000000002, 220.41250000000002, 220.44000000000003,<br>220.46750000000003, 220.49500000000003, 220.52250000000004,<br>220.55000000000004, 220.57750000000004, 220.60500000000002,<br>220.63250000000002, 220.66000000000003, 220.68750000000003,<br>220.71500000000003, 220.74250000000004, 220.77000000000004,<br>220.79750000000004, 220.82500000000002, 220.85250000000002,<br>220.88000000000002, 220.90750000000003, 220.93500000000003,<br>220.96250000000003, 220.99000000000004, 221.01750000000004,<br>221.04500000000002, 221.07250000000002, 221.10000000000002,<br>221.12750000000003, 221.15500000000003, 221.18250000000003,<br>221.21000000000004, 221.23750000000004, 221.26500000000004,<br>221.29250000000002, 221.32000000000002, 221.34750000000003,<br>221.37500000000003, 221.40250000000003, 221.43000000000004,<br>221.45750000000004, 221.48500000000004, 221.51250000000002,<br>221.54000000000002, 221.56750000000002, 221.59500000000003,<br>221.62250000000003, 221.65000000000003, 221.67750000000004,<br>221.70500000000004, 221.73250000000002, 221.76000000000002,<br>221.78750000000002, 221.81500000000003, 221.84250000000003,<br>221.87000000000003, 221.89750000000004, 221.92500000000004,<br>221.95250000000004, 221.98000000000002, 222.00750000000002,<br>222.03500000000003, 222.06250000000003, 222.09000000000003,<br>222.11750000000004, 222.14500000000004, 222.17250000000004,<br>222.20000000000002, 222.22750000000002, 222.25500000000002,<br>222.28250000000003, 222.31000000000003, 222.33750000000003,<br>222.36500000000004, 222.39250000000004, 222.42000000000002,<br>222.44750000000002, 222.47500000000002, 222.50250000000003,<br>222.53000000000003, 222.55750000000003, 222.58500000000004,<br>222.61250000000004, 222.64000000000004, 222.66750000000002,<br>222.69500000000002, 222.72250000000003, 222.75000000000003,<br>222.77750000000003, 222.80500000000004, 222.83250000000004,<br>222.86000000000004, 222.88750000000002, 222.91500000000002,<br>222.94250000000002, 222.97000000000003, 222.99750000000003,<br>223.02500000000003, 223.05250000000004, 223.08000000000004,<br>223.10750000000002, 223.13500000000002, 223.16250000000002,<br>223.19000000000003, 223.21750000000003, 223.24500000000003,<br>223.27250000000004, 223.30000000000004, 223.32750000000004,<br>223.35500000000002, 223.38250000000002, 223.41000000000003, |

| Description | Value                                                                                                                                                                                                                                                                                                                                                                                                                                                                                                                                                                                                                                                                                                                                                                                                                                                                                                                                                                                                                                                                                                                                                                                                                                                                                                                                                                                                                                                                                                                                                                                                                                                                                                                                                                                                                                                                                                                                                                                                                                                                                                                                                                                                                                                                                                                                                                                                                                                                                                                                                                                                                                                                                                                                                                                                                                                                                                                                                                                                                                                                                                                                        |
|-------------|----------------------------------------------------------------------------------------------------------------------------------------------------------------------------------------------------------------------------------------------------------------------------------------------------------------------------------------------------------------------------------------------------------------------------------------------------------------------------------------------------------------------------------------------------------------------------------------------------------------------------------------------------------------------------------------------------------------------------------------------------------------------------------------------------------------------------------------------------------------------------------------------------------------------------------------------------------------------------------------------------------------------------------------------------------------------------------------------------------------------------------------------------------------------------------------------------------------------------------------------------------------------------------------------------------------------------------------------------------------------------------------------------------------------------------------------------------------------------------------------------------------------------------------------------------------------------------------------------------------------------------------------------------------------------------------------------------------------------------------------------------------------------------------------------------------------------------------------------------------------------------------------------------------------------------------------------------------------------------------------------------------------------------------------------------------------------------------------------------------------------------------------------------------------------------------------------------------------------------------------------------------------------------------------------------------------------------------------------------------------------------------------------------------------------------------------------------------------------------------------------------------------------------------------------------------------------------------------------------------------------------------------------------------------------------------------------------------------------------------------------------------------------------------------------------------------------------------------------------------------------------------------------------------------------------------------------------------------------------------------------------------------------------------------------------------------------------------------------------------------------------------------|
|             | 223.43750000000003, 223.46500000000003, 223.49250000000004,<br>223.52000000000004, 223.54750000000004, 223.57500000000002,<br>223.60250000000002, 223.63000000000002, 223.65750000000003,<br>223.68500000000003, 223.71250000000003, 223.74000000000004,<br>223.76750000000004, 223.79500000000002, 223.82250000000002,<br>223.85000000000002, 223.87750000000003, 223.90500000000003,<br>223.93250000000003, 223.96000000000004, 223.98750000000004,<br>224.01500000000004, 224.04250000000002, 224.07000000000002,<br>224.09750000000003, 224.12500000000003, 224.15250000000003,<br>224.18000000000004, 224.20750000000004, 224.23500000000004,<br>224.26250000000005, 224.29000000000002, 224.31750000000002,<br>224.34500000000003, 224.37250000000003, 224.40000000000003,<br>224.42750000000004, 224.45500000000004, 224.48250000000002,<br>224.51000000000002, 224.53750000000002, 224.56500000000003,<br>224.59250000000003, 224.62000000000003, 224.64750000000004,<br>224.67500000000004, 224.70250000000004, 224.73000000000002,<br>224.75750000000002, 224.78500000000003, 224.81250000000003,<br>224.84000000000003, 224.86750000000004, 224.89500000000004,<br>224.92250000000004, 224.95000000000005, 224.97750000000002,<br>225.00500000000002, 225.03250000000003, 225.06000000000003,<br>225.08750000000003, 225.11500000000004, 225.14250000000004,<br>225.17000000000002, 225.19750000000002, 225.22500000000002,<br>225.25250000000003, 225.28000000000003, 225.30750000000003,<br>225.33500000000004, 225.36250000000004, 225.39000000000004,<br>225.41750000000002, 225.44500000000002, 225.47250000000003,<br>225.50000000000003, 225.52750000000003, 225.55500000000004,<br>225.58250000000004, 225.61000000000004, 225.63750000000005,<br>225.66500000000002, 225.69250000000002, 225.72000000000003,<br>225.74750000000003, 225.77500000000003, 225.80250000000004,<br>225.83000000000004, 225.85750000000002, 225.88500000000002,<br>225.91250000000002, 225.94000000000003, 225.96750000000003,<br>225.99500000000003, 226.02250000000004, 226.05000000000004,<br>226.07750000000004, 226.10500000000002, 226.13250000000002,<br>226.16000000000003, 226.18750000000003, 226.21500000000003,<br>226.24250000000004, 226.27000000000004, 226.29750000000004,<br>226.32500000000005, 226.35250000000002, 226.38000000000002,<br>226.40750000000003, 226.43500000000003, 226.46250000000003,<br>226.49000000000004, 226.51750000000004, 226.54500000000002,<br>226.57250000000002, 226.60000000000002, 226.62750000000003,<br>226.65500000000003, 226.68250000000003, 226.71000000000004,<br>226.73750000000004, 226.76500000000004, 226.79250000000002,<br>226.82000000000002, 226.84750000000003, 226.87500000000003,<br>226.90250000000003, 226.93000000000004, 226.95750000000004,<br>226.98500000000004, 227.01250000000005, 227.04000000000002,<br>227.06750000000002, 227.09500000000003, 227.12250000000003,<br>227.15000000000003, 227.17750000000004, 227.20500000000004,<br>227.23250000000002, 227.26000000000002, 227.28750000000002,<br>227.31500000000003, 227.34250000000003, 227.37000000000003, |

| Description | Value                                                                                                                                                                                                                                                                                                                                                                                                                                                                                                                                                                                                                                                                                                                                                                                                                                                                                                                                                                                                                                                                                                                                                                                                                                                                                                                                                                                                                                                                                                                                                                                                                                                                                                                                                                                                                                                                                                                                                                                                                                                                                                                                                                                                                                                                                                                                                                                                                                                                                                                                                                                                                                                                                                                                                                                                                                                                                                                                                                                                                                                                                                                                        |
|-------------|----------------------------------------------------------------------------------------------------------------------------------------------------------------------------------------------------------------------------------------------------------------------------------------------------------------------------------------------------------------------------------------------------------------------------------------------------------------------------------------------------------------------------------------------------------------------------------------------------------------------------------------------------------------------------------------------------------------------------------------------------------------------------------------------------------------------------------------------------------------------------------------------------------------------------------------------------------------------------------------------------------------------------------------------------------------------------------------------------------------------------------------------------------------------------------------------------------------------------------------------------------------------------------------------------------------------------------------------------------------------------------------------------------------------------------------------------------------------------------------------------------------------------------------------------------------------------------------------------------------------------------------------------------------------------------------------------------------------------------------------------------------------------------------------------------------------------------------------------------------------------------------------------------------------------------------------------------------------------------------------------------------------------------------------------------------------------------------------------------------------------------------------------------------------------------------------------------------------------------------------------------------------------------------------------------------------------------------------------------------------------------------------------------------------------------------------------------------------------------------------------------------------------------------------------------------------------------------------------------------------------------------------------------------------------------------------------------------------------------------------------------------------------------------------------------------------------------------------------------------------------------------------------------------------------------------------------------------------------------------------------------------------------------------------------------------------------------------------------------------------------------------------|
|             | 227.39750000000004, 227.42500000000004, 227.45250000000004,<br>227.48000000000002, 227.50750000000002, 227.53500000000003,<br>227.56250000000003, 227.59000000000003, 227.61750000000004,<br>227.64500000000004, 227.67250000000004, 227.70000000000005,<br>227.72750000000002, 227.75500000000002, 227.78250000000003,<br>227.81000000000003, 227.83750000000003, 227.86500000000004,<br>227.89250000000004, 227.92000000000002, 227.94750000000002,<br>227.97500000000002, 228.00250000000003, 228.03000000000003,<br>228.05750000000003, 228.08500000000004, 228.11250000000004,<br>228.14000000000004, 228.16750000000002, 228.19500000000002,<br>228.22250000000003, 228.25000000000003, 228.27750000000003,<br>228.30500000000004, 228.33250000000004, 228.36000000000004,<br>228.38750000000005, 228.41500000000002, 228.44250000000002,<br>228.47000000000003, 228.49750000000003, 228.52500000000003,<br>228.55250000000004, 228.58000000000004, 228.60750000000002,<br>228.63500000000002, 228.66250000000002, 228.69000000000003,<br>228.71750000000003, 228.74500000000003, 228.77250000000004,<br>228.80000000000004, 228.82750000000004, 228.85500000000002,<br>228.88250000000002, 228.91000000000003, 228.93750000000003,<br>228.96500000000003, 228.99250000000004, 229.02000000000004,<br>229.04750000000004, 229.07500000000005, 229.10250000000002,<br>229.13000000000002, 229.15750000000003, 229.18500000000003,<br>229.21250000000003, 229.24000000000004, 229.26750000000004,<br>229.29500000000002, 229.32250000000002, 229.35000000000002,<br>229.37750000000003, 229.40500000000003, 229.43250000000003,<br>229.46000000000004, 229.48750000000004, 229.51500000000004,<br>229.54250000000002, 229.57000000000002, 229.59750000000003,<br>229.62500000000003, 229.65250000000003, 229.68000000000004,<br>229.70750000000004, 229.73500000000004, 229.76250000000005,<br>229.79000000000002, 229.81750000000002, 229.84500000000003,<br>229.87250000000003, 229.90000000000003, 229.92750000000004,<br>229.95500000000004, 229.98250000000002, 230.01000000000002,<br>230.03750000000002, 230.06500000000003, 230.09250000000003,<br>230.12000000000003, 230.14750000000004, 230.17500000000004,<br>230.20250000000004, 230.23000000000002, 230.25750000000002,<br>230.28500000000003, 230.31250000000003, 230.34000000000003,<br>230.36750000000004, 230.39500000000004, 230.42250000000004,<br>230.45000000000005, 230.47750000000002, 230.50500000000002,<br>230.53250000000003, 230.56000000000003, 230.58750000000003,<br>230.61500000000004, 230.64250000000004, 230.67000000000002,<br>230.69750000000002, 230.72500000000002, 230.75250000000003,<br>230.78000000000003, 230.80750000000003, 230.83500000000004,<br>230.86250000000004, 230.89000000000004, 230.91750000000002,<br>230.94500000000002, 230.97250000000003, 231.00000000000003,<br>231.02750000000003, 231.05500000000004, 231.08250000000004,<br>231.11000000000004, 231.13750000000005, 231.16500000000002,<br>231.19250000000002, 231.22000000000003, 231.24750000000003,<br>231.27500000000003, 231.30250000000004, 231.33000000000004, |

| Description | Value                                                                                                                                                                                                                                                                                                                                                                                                                                                                                                                                                                                                                                                                                                                                                                                                                                                                                                                                                                                                                                                                                                                                                                                                                                                                                                                                                                                                                                                                                                                                                                                                                                                                                                                                                                                                                                                                                                                                                                                                                                                                                                                                                                                                                                                                                                                                                                                                                                                                                                                                                                                                                                                                                                                                                                                                                                                                                                                                                                                                                                                                                                                                        |
|-------------|----------------------------------------------------------------------------------------------------------------------------------------------------------------------------------------------------------------------------------------------------------------------------------------------------------------------------------------------------------------------------------------------------------------------------------------------------------------------------------------------------------------------------------------------------------------------------------------------------------------------------------------------------------------------------------------------------------------------------------------------------------------------------------------------------------------------------------------------------------------------------------------------------------------------------------------------------------------------------------------------------------------------------------------------------------------------------------------------------------------------------------------------------------------------------------------------------------------------------------------------------------------------------------------------------------------------------------------------------------------------------------------------------------------------------------------------------------------------------------------------------------------------------------------------------------------------------------------------------------------------------------------------------------------------------------------------------------------------------------------------------------------------------------------------------------------------------------------------------------------------------------------------------------------------------------------------------------------------------------------------------------------------------------------------------------------------------------------------------------------------------------------------------------------------------------------------------------------------------------------------------------------------------------------------------------------------------------------------------------------------------------------------------------------------------------------------------------------------------------------------------------------------------------------------------------------------------------------------------------------------------------------------------------------------------------------------------------------------------------------------------------------------------------------------------------------------------------------------------------------------------------------------------------------------------------------------------------------------------------------------------------------------------------------------------------------------------------------------------------------------------------------------|
|             | 231.35750000000002, 231.38500000000002, 231.41250000000002,<br>231.44000000000003, 231.46750000000003, 231.49500000000003,<br>231.52250000000004, 231.55000000000004, 231.57750000000004,<br>231.60500000000002, 231.63250000000002, 231.66000000000003,<br>231.68750000000003, 231.71500000000003, 231.74250000000004,<br>231.77000000000004, 231.79750000000004, 231.82500000000005,<br>231.85250000000002, 231.88000000000002, 231.90750000000003,<br>231.93500000000003, 231.96250000000003, 231.99000000000004,<br>232.01750000000004, 232.04500000000002, 232.07250000000002,<br>232.10000000000002, 232.12750000000003, 232.15500000000003,<br>232.18250000000003, 232.21000000000004, 232.23750000000004,<br>232.26500000000004, 232.29250000000002, 232.32000000000002,<br>232.34750000000003, 232.37500000000003, 232.40250000000003,<br>232.43000000000004, 232.45750000000004, 232.48500000000004,<br>232.51250000000005, 232.54000000000002, 232.56750000000002,<br>232.59500000000003, 232.62250000000003, 232.65000000000003,<br>232.67750000000004, 232.70500000000004, 232.73250000000002,<br>232.76000000000002, 232.78750000000002, 232.81500000000003,<br>232.84250000000003, 232.87000000000003, 232.89750000000004,<br>232.92500000000004, 232.95250000000004, 232.98000000000002,<br>233.00750000000002, 233.03500000000003, 233.06250000000003,<br>233.09000000000003, 233.11750000000004, 233.14500000000004,<br>233.17250000000004, 233.20000000000005, 233.22750000000002,<br>233.25500000000002, 233.28250000000003, 233.31000000000003,<br>233.33750000000003, 233.36500000000004, 233.39250000000004,<br>233.42000000000002, 233.44750000000002, 233.47500000000002,<br>233.50250000000003, 233.53000000000003, 233.55750000000003,<br>233.58500000000004, 233.61250000000004, 233.64000000000004,<br>233.66750000000002, 233.69500000000002, 233.72250000000003,<br>233.75000000000003, 233.77750000000003, 233.80500000000004,<br>233.83250000000004, 233.86000000000004, 233.88750000000005,<br>233.91500000000002, 233.94250000000002, 233.97000000000003,<br>233.99750000000003, 234.02500000000003, 234.05250000000004,<br>234.08000000000004, 234.10750000000002, 234.13500000000002,<br>234.16250000000002, 234.19000000000003, 234.21750000000003,<br>234.24500000000003, 234.27250000000004, 234.30000000000004,<br>234.32750000000004, 234.35500000000002, 234.38250000000002,<br>234.41000000000003, 234.43750000000003, 234.46500000000003,<br>234.49250000000004, 234.52000000000004, 234.54750000000004,<br>234.57500000000005, 234.60250000000002, 234.63000000000002,<br>234.65750000000003, 234.68500000000003, 234.71250000000003,<br>234.74000000000004, 234.76750000000004, 234.79500000000002,<br>234.82250000000005, 234.85000000000002, 234.87750000000003,<br>234.90500000000003, 234.93250000000003, 234.96000000000004,<br>234.98750000000004, 235.01500000000004, 235.04250000000002,<br>235.07000000000002, 235.09750000000003, 235.12500000000003,<br>235.15250000000003, 235.18000000000004, 235.20750000000004,<br>235.23500000000004, 235.26250000000005, 235.29000000000002, |



| Description | Value                                                                                                                                                                                                                                                                                                                                                                                                                                                                                                                                                                                                                                                                                                                                                                                                                                                                                                                                                                                                                                                                                                                                                                                                                                                                                                                                                                                                                                                                                                                                                                                                                                                                                                                                                                                                                                                                                                                                                                                                                                                                                                                                                                                                                                                                                                                                                                                                                                                                                                                                                                                                                                                                                                                                                                                                                                                                                                                                                                                                                                                                                                                                        |
|-------------|----------------------------------------------------------------------------------------------------------------------------------------------------------------------------------------------------------------------------------------------------------------------------------------------------------------------------------------------------------------------------------------------------------------------------------------------------------------------------------------------------------------------------------------------------------------------------------------------------------------------------------------------------------------------------------------------------------------------------------------------------------------------------------------------------------------------------------------------------------------------------------------------------------------------------------------------------------------------------------------------------------------------------------------------------------------------------------------------------------------------------------------------------------------------------------------------------------------------------------------------------------------------------------------------------------------------------------------------------------------------------------------------------------------------------------------------------------------------------------------------------------------------------------------------------------------------------------------------------------------------------------------------------------------------------------------------------------------------------------------------------------------------------------------------------------------------------------------------------------------------------------------------------------------------------------------------------------------------------------------------------------------------------------------------------------------------------------------------------------------------------------------------------------------------------------------------------------------------------------------------------------------------------------------------------------------------------------------------------------------------------------------------------------------------------------------------------------------------------------------------------------------------------------------------------------------------------------------------------------------------------------------------------------------------------------------------------------------------------------------------------------------------------------------------------------------------------------------------------------------------------------------------------------------------------------------------------------------------------------------------------------------------------------------------------------------------------------------------------------------------------------------------|
|             | 235.31750000000002, 235.34500000000003, 235.37250000000003,<br>235.40000000000003, 235.42750000000004, 235.45500000000004,<br>235.48250000000002, 235.51000000000005, 235.53750000000002,<br>235.56500000000003, 235.59250000000003, 235.62000000000003,<br>235.64750000000004, 235.67500000000004, 235.70250000000004,<br>235.73000000000002, 235.75750000000002, 235.78500000000003,<br>235.81250000000003, 235.84000000000003, 235.86750000000004,<br>235.89500000000004, 235.92250000000004, 235.95000000000005,<br>235.97750000000002, 236.00500000000002, 236.03250000000003,<br>236.06000000000003, 236.08750000000003, 236.11500000000004,<br>236.14250000000004, 236.17000000000004, 236.19750000000005,<br>236.22500000000002, 236.25250000000003, 236.28000000000003,<br>236.30750000000003, 236.33500000000004, 236.36250000000004,<br>236.39000000000004, 236.41750000000002, 236.44500000000002,<br>236.47250000000003, 236.50000000000003, 236.52750000000003,<br>236.55500000000004, 236.58250000000004, 236.61000000000004,<br>236.63750000000005, 236.66500000000002, 236.69250000000002,<br>236.72000000000003, 236.74750000000003, 236.77500000000003,<br>236.80250000000004, 236.83000000000004, 236.85750000000004,<br>236.88500000000005, 236.91250000000002, 236.94000000000003,<br>236.96750000000003, 236.99500000000003, 237.02250000000004,<br>237.05000000000004, 237.07750000000004, 237.10500000000002,<br>237.13250000000002, 237.16000000000003, 237.18750000000003,<br>237.21500000000003, 237.24250000000004, 237.27000000000004,<br>237.29750000000004, 237.32500000000005, 237.35250000000002,<br>237.38000000000002, 237.40750000000003, 237.43500000000003,<br>237.46250000000003, 237.49000000000004, 237.51750000000004,<br>237.54500000000004, 237.57250000000005, 237.60000000000002,<br>237.62750000000003, 237.65500000000003, 237.68250000000003,<br>237.71000000000004, 237.73750000000004, 237.76500000000004,<br>237.79250000000002, 237.82000000000002, 237.84750000000003,<br>237.87500000000003, 237.90250000000003, 237.93000000000004,<br>237.95750000000004, 237.98500000000004, 238.01250000000005,<br>238.04000000000002, 238.06750000000002, 238.09500000000003,<br>238.12250000000003, 238.15000000000003, 238.17750000000004,<br>238.20500000000004, 238.23250000000004, 238.26000000000005,<br>238.28750000000002, 238.31500000000003, 238.34250000000003,<br>238.37000000000003, 238.39750000000004, 238.42500000000004,<br>238.45250000000004, 238.48000000000002, 238.50750000000002,<br>238.53500000000003, 238.56250000000003, 238.59000000000003,<br>238.61750000000004, 238.64500000000004, 238.67250000000004,<br>238.70000000000005, 238.72750000000002, 238.75500000000002,<br>238.78250000000003, 238.81000000000003, 238.83750000000003,<br>238.86500000000004, 238.89250000000004, 238.92000000000004,<br>238.94750000000005, 238.97500000000002, 239.00250000000003,<br>239.03000000000003, 239.05750000000003, 239.08500000000004,<br>239.11250000000004, 239.14000000000004, 239.16750000000002,<br>239.19500000000002, 239.22250000000003, 239.25000000000003, |

| Description        | Value                                                                                                                                                                                                                                                                                                                                                                                                                                                                                                                                                                                                                                                                                                                                                                                                                                                                                                                                                                                                                                                                                                                                                                                                                                                                                                                                                                                                                                                                                                                                                                                                                                                                                                                                                                                                                                                                                                                                                                                                                                                                           |
|--------------------|---------------------------------------------------------------------------------------------------------------------------------------------------------------------------------------------------------------------------------------------------------------------------------------------------------------------------------------------------------------------------------------------------------------------------------------------------------------------------------------------------------------------------------------------------------------------------------------------------------------------------------------------------------------------------------------------------------------------------------------------------------------------------------------------------------------------------------------------------------------------------------------------------------------------------------------------------------------------------------------------------------------------------------------------------------------------------------------------------------------------------------------------------------------------------------------------------------------------------------------------------------------------------------------------------------------------------------------------------------------------------------------------------------------------------------------------------------------------------------------------------------------------------------------------------------------------------------------------------------------------------------------------------------------------------------------------------------------------------------------------------------------------------------------------------------------------------------------------------------------------------------------------------------------------------------------------------------------------------------------------------------------------------------------------------------------------------------|
|                    | 239.27750000000003, 239.30500000000004, 239.33250000000004, 239.36000000000004, 239.38750000000005, 239.41500000000002, 239.44250000000002, 239.47000000000003, 239.49750000000003, 239.52500000000003, 239.55250000000004, 239.58000000000004, 239.60750000000004, 239.63500000000005, 239.66250000000002, 239.69000000000003, 239.71750000000003, 239.74500000000003, 239.77250000000004, 239.80000000000004, 239.82750000000004, 239.85500000000002, 239.88250000000002, 239.91000000000003, 239.93750000000003, 239.96500000000003, 239.99250000000004, 240.02000000000004, 240.04750000000004, 240.07500000000005, 240.10250000000002, 240.13000000000002, 240.15750000000003, 240.18500000000003, 240.21250000000003, 240.24000000000004, 240.26750000000004, 240.29500000000004, 240.32250000000005, 240.35000000000002, 240.37750000000003, 240.40500000000003, 240.43250000000003, 240.46000000000004, 240.48750000000004, 240.51500000000004, 240.54250000000002, 240.57000000000002, 240.59750000000003, 240.62500000000003, 240.65250000000003, 240.68000000000004, 240.70750000000004, 240.73500000000004, 240.76250000000005, 240.79000000000002, 240.81750000000002, 240.84500000000003, 240.87250000000003, 240.90000000000003, 240.92750000000004, 240.95500000000004, 240.98250000000004, 241.01000000000005, 241.03750000000002, 241.06500000000003, 241.09250000000003, 241.12000000000003, 241.14750000000004, 241.17500000000004, 241.20250000000004, 241.23000000000002, 241.25750000000005, 241.28500000000003, 241.31250000000003, 241.34000000000003, 241.36750000000004, 241.39500000000004, 241.42250000000004, 241.45000000000005, 241.47750000000002, 241.50500000000002, 241.53250000000003, 241.56000000000003, 241.58750000000003, 241.61500000000004, 241.64250000000004, 241.67000000000002, 241.69750000000005, 241.72500000000002, 241.75250000000003, 241.78000000000003, 241.80750000000003, 241.83500000000004, 241.86250000000004, 241.89000000000004, 241.91750000000002, 241.94500000000005, 241.97250000000003, 242.00000000000003} |
| Relative tolerance | 0.005                                                                                                                                                                                                                                                                                                                                                                                                                                                                                                                                                                                                                                                                                                                                                                                                                                                                                                                                                                                                                                                                                                                                                                                                                                                                                                                                                                                                                                                                                                                                                                                                                                                                                                                                                                                                                                                                                                                                                                                                                                                                           |

#### TIME STEPPING

| Description          | Value |
|----------------------|-------|
| Maximum BDF order    | 2     |
| Nonlinear controller | On    |

#### LOG

|     |        |            |     |    |     |   |    |   |         |         |
|-----|--------|------------|-----|----|-----|---|----|---|---------|---------|
| 495 | 232.22 | 0.055      | 8   | 5  | 8   | 2 | 0  | 0 | 5e-13   | 1e-14   |
| -   | 232.24 | - out      |     |    |     |   |    |   |         |         |
| -   | 232.27 | - out      |     |    |     |   |    |   |         |         |
| 496 | 232.27 | 0.055      | 10  | 6  | 10  | 2 | 0  | 0 | 1.4e-13 | 8.3e-15 |
| -   | 232.29 | - out      |     |    |     |   |    |   |         |         |
| -   | 232.32 | - out      |     |    |     |   |    |   |         |         |
| 497 | 232.33 | 0.055      | 12  | 7  | 12  | 2 | 0  | 0 | 2.5e-13 | 7.8e-15 |
| -   | 232.35 | - out      |     |    |     |   |    |   |         |         |
| -   | 232.38 | - out      |     |    |     |   |    |   |         |         |
| 498 | 232.38 | 0.055      | 14  | 8  | 14  | 2 | 0  | 0 | 1.3e-13 | 7.7e-15 |
| -   | 232.4  | - out      |     |    |     |   |    |   |         |         |
| -   | 232.43 | - out      |     |    |     |   |    |   |         |         |
| 499 | 232.44 | 0.055      | 16  | 9  | 16  | 2 | 0  | 0 | 4.9e-13 | 8.5e-15 |
| -   | 232.46 | - out      |     |    |     |   |    |   |         |         |
| -   | 232.49 | - out      |     |    |     |   |    |   |         |         |
| 500 | 232.49 | 0.055      | 18  | 10 | 18  | 2 | 0  | 0 | 4e-14   | 8.4e-15 |
| -   | 232.51 | - out      |     |    |     |   |    |   |         |         |
| -   | 232.54 | - out      |     |    |     |   |    |   |         |         |
| 501 | 232.55 | 0.055      | 20  | 11 | 20  | 2 | 0  | 0 | 3.9e-13 | 8.3e-15 |
| -   | 232.57 | - out      |     |    |     |   |    |   |         |         |
| -   | 232.6  | - out      |     |    |     |   |    |   |         |         |
| 502 | 232.6  | 0.055      | 22  | 12 | 22  | 2 | 0  | 0 | 6e-14   | 8.4e-15 |
| -   | 232.62 | - out      |     |    |     |   |    |   |         |         |
| -   | 232.65 | - out      |     |    |     |   |    |   |         |         |
| 503 | 232.66 | 0.055      | 24  | 13 | 24  | 2 | 0  | 0 | 2.4e-13 | 8e-15   |
| -   | 232.68 | - out      |     |    |     |   |    |   |         |         |
| -   | 232.71 | - out      |     |    |     |   |    |   |         |         |
| 504 | 232.71 | 0.055      | 26  | 14 | 26  | 2 | 0  | 0 | 1.9e-13 | 1e-14   |
| -   | 232.73 | - out      |     |    |     |   |    |   |         |         |
| -   | 232.76 | - out      |     |    |     |   |    |   |         |         |
| -   | 232.79 | - out      |     |    |     |   |    |   |         |         |
| -   | 232.82 | - out      |     |    |     |   |    |   |         |         |
| 505 | 232.82 | 0.11       | 28  | 15 | 28  | 2 | 0  | 0 | 1.8e-13 | 6.3e-15 |
| -   | 232.84 | - out      |     |    |     |   |    |   |         |         |
| 506 | 232.85 | 0.0275     | 33  | 17 | 33  | 2 | 1  | 0 | 8.5e-14 | 6e-15   |
| -   | 232.87 | - out      |     |    |     |   |    |   |         |         |
| -   | 232.9  | - out      |     |    |     |   |    |   |         |         |
| 507 | 232.9  | 0.055      | 35  | 18 | 35  | 2 | 1  | 0 | 2e-13   | 7e-15   |
| 508 | 232.92 | 0.01375    | 40  | 20 | 40  | 2 | 2  | 0 | 3.1e-14 | 4.2e-15 |
| 509 | 232.92 | 0.006875   | 44  | 22 | 44  | 2 | 3  | 0 | 1.5e-14 | 7.1e-15 |
| -   | 232.93 | - out      |     |    |     |   |    |   |         |         |
| 510 | 232.93 | 0.0034375  | 48  | 24 | 48  | 2 | 4  | 0 | 1.3e-14 | 6.2e-15 |
| 511 | 232.93 | 0.0017188  | 53  | 26 | 53  | 2 | 5  | 0 | 1.2e-14 | 5.9e-15 |
| 512 | 232.93 | 0.00085938 | 58  | 28 | 58  | 2 | 6  | 0 | 9.5e-15 | 3.5e-15 |
| 513 | 232.93 | 0.0017188  | 59  | 29 | 59  | 2 | 6  | 0 | 3.1e-14 | 3.5e-15 |
| 514 | 232.93 | 0.00021484 | 69  | 32 | 69  | 2 | 8  | 0 | 5.4e-15 | 5.3e-16 |
| 515 | 232.93 | 0.00016701 | 74  | 34 | 74  | 2 | 9  | 0 | 2.2e-15 | 3.6e-16 |
| 516 | 232.93 | 6.116e-06  | 88  | 38 | 88  | 1 | 12 | 0 | 3.6e-16 | 3e-16   |
| 517 | 232.93 | 1.2232e-05 | 89  | 39 | 89  | 1 | 12 | 0 | 1.6e-16 | 1.1e-16 |
| 518 | 232.93 | 1.5775e-06 | 101 | 42 | 101 | 1 | 14 | 0 | 5.2e-16 | 5.7e-16 |
| 519 | 232.93 | 3.1549e-06 | 102 | 43 | 102 | 1 | 14 | 0 | 1.6e-16 | 1.7e-16 |
| 520 | 232.93 | 5.1659e-07 | 112 | 46 | 112 | 1 | 16 | 0 | 3e-16   | 2.1e-16 |
| 521 | 232.93 | 4.3053e-07 | 116 | 48 | 116 | 1 | 17 | 0 | 3.3e-16 | 3.6e-16 |
| 522 | 232.93 | 9.1749e-08 | 123 | 51 | 123 | 1 | 19 | 0 | 3e-16   | 2.8e-16 |
| 523 | 232.93 | 1.0374e-07 | 126 | 53 | 126 | 1 | 20 | 0 | 2.5e-16 | 2.4e-16 |
| 524 | 232.93 | 1.1457e-07 | 130 | 55 | 130 | 1 | 21 | 0 | 2.3e-15 | 8e-16   |

|     |        |            |     |     |     |   |    |   |         |         |
|-----|--------|------------|-----|-----|-----|---|----|---|---------|---------|
| 525 | 232.93 | 8.9759e-08 | 132 | 56  | 132 | 1 | 21 | 0 | 1e-14   | 1.1e-14 |
| 526 | 232.93 | 8.9759e-08 | 134 | 57  | 134 | 1 | 21 | 0 | 1.9e-14 | 1.9e-14 |
| 527 | 232.93 | 8.9759e-08 | 136 | 58  | 136 | 1 | 21 | 0 | 3.3e-14 | 3.4e-14 |
| 528 | 232.93 | 1.7952e-07 | 138 | 59  | 138 | 1 | 21 | 0 | 2.3e-14 | 2e-14   |
| 529 | 232.93 | 1.7952e-07 | 140 | 60  | 140 | 1 | 21 | 0 | 1.3e-14 | 9.5e-15 |
| 530 | 232.93 | 3.5904e-07 | 142 | 61  | 142 | 1 | 21 | 0 | 3.5e-15 | 1.7e-15 |
| 531 | 232.93 | 3.5904e-07 | 144 | 62  | 144 | 1 | 21 | 0 | 4.6e-15 | 2.2e-15 |
| 532 | 232.93 | 7.1807e-07 | 146 | 63  | 146 | 1 | 21 | 0 | 3.9e-15 | 1.6e-15 |
| 533 | 232.93 | 1.4361e-06 | 148 | 64  | 148 | 1 | 21 | 0 | 3.4e-15 | 1.3e-15 |
| 534 | 232.93 | 1.4361e-06 | 150 | 65  | 150 | 1 | 21 | 0 | 3.1e-15 | 1.6e-15 |
| 535 | 232.93 | 2.8723e-06 | 152 | 66  | 152 | 1 | 21 | 0 | 4.9e-15 | 3.1e-15 |
| 536 | 232.93 | 2.8723e-06 | 154 | 67  | 154 | 1 | 21 | 0 | 7.3e-15 | 4.2e-15 |
| 537 | 232.93 | 5.7446e-06 | 156 | 68  | 156 | 1 | 21 | 0 | 4.2e-15 | 1.3e-15 |
| 538 | 232.93 | 5.7446e-06 | 158 | 69  | 158 | 1 | 21 | 0 | 6.7e-15 | 1.7e-15 |
| 539 | 232.93 | 5.7446e-06 | 160 | 70  | 160 | 1 | 21 | 0 | 4.5e-15 | 3.1e-15 |
| 540 | 232.93 | 1.1489e-05 | 162 | 71  | 162 | 2 | 21 | 0 | 4.6e-15 | 2e-15   |
| 541 | 232.93 | 1.1489e-05 | 164 | 72  | 164 | 2 | 21 | 0 | 4e-15   | 2.5e-15 |
| 542 | 232.93 | 2.2978e-05 | 166 | 73  | 166 | 2 | 21 | 0 | 5.2e-15 | 6.1e-15 |
| 543 | 232.93 | 2.068e-05  | 168 | 74  | 168 | 2 | 21 | 0 | 2.4e-15 | 1e-15   |
| 544 | 232.93 | 2.068e-05  | 170 | 75  | 170 | 2 | 21 | 0 | 2.8e-15 | 3.7e-15 |
| 545 | 232.93 | 2.068e-05  | 172 | 76  | 172 | 2 | 21 | 0 | 2.5e-15 | 3.7e-15 |
| 546 | 232.93 | 2.068e-05  | 174 | 77  | 174 | 2 | 21 | 0 | 1.9e-15 | 2.4e-15 |
| 547 | 232.93 | 4.1361e-05 | 176 | 78  | 176 | 2 | 21 | 0 | 1.6e-15 | 1.6e-15 |
| 548 | 232.93 | 4.1361e-05 | 178 | 79  | 178 | 2 | 21 | 0 | 2.1e-15 | 1.6e-15 |
| 549 | 232.93 | 4.1361e-05 | 180 | 80  | 180 | 2 | 21 | 0 | 1.5e-15 | 1.2e-15 |
| 550 | 232.93 | 4.1361e-05 | 182 | 81  | 182 | 2 | 21 | 0 | 1.8e-15 | 1.4e-15 |
| 551 | 232.93 | 8.2722e-05 | 184 | 82  | 184 | 2 | 21 | 0 | 2e-15   | 1.8e-15 |
| 552 | 232.93 | 8.2722e-05 | 186 | 83  | 186 | 2 | 21 | 0 | 1.7e-15 | 2.5e-15 |
| 553 | 232.93 | 8.2722e-05 | 188 | 84  | 188 | 2 | 21 | 0 | 1.7e-15 | 2.4e-15 |
| 554 | 232.93 | 8.2722e-05 | 190 | 85  | 190 | 2 | 21 | 0 | 1.7e-15 | 2.6e-15 |
| 555 | 232.93 | 8.2722e-05 | 192 | 86  | 192 | 2 | 21 | 0 | 1.5e-15 | 2.3e-15 |
| 556 | 232.93 | 0.00016544 | 194 | 87  | 194 | 2 | 21 | 0 | 2.7e-15 | 4.9e-15 |
| 557 | 232.93 | 0.00016544 | 196 | 88  | 196 | 2 | 21 | 0 | 3.4e-15 | 1.2e-14 |
| 558 | 232.93 | 0.00016544 | 198 | 89  | 198 | 2 | 21 | 0 | 2e-15   | 1.2e-14 |
| 559 | 232.93 | 0.00016544 | 200 | 90  | 200 | 2 | 21 | 0 | 3.4e-15 | 1.1e-14 |
| 560 | 232.93 | 0.00016544 | 202 | 91  | 202 | 2 | 21 | 0 | 5.8e-15 | 6e-15   |
| 561 | 232.93 | 0.00033089 | 204 | 92  | 204 | 2 | 21 | 0 | 6.8e-15 | 1.2e-14 |
| 562 | 232.94 | 0.00033089 | 206 | 93  | 206 | 2 | 21 | 0 | 7.2e-15 | 1.2e-14 |
| 563 | 232.94 | 0.00033089 | 208 | 94  | 208 | 2 | 21 | 0 | 3.6e-15 | 9.8e-15 |
| 564 | 232.94 | 0.00033089 | 210 | 95  | 210 | 2 | 21 | 0 | 6.7e-15 | 9.7e-15 |
| 565 | 232.94 | 0.00033089 | 212 | 96  | 212 | 2 | 21 | 0 | 3.9e-15 | 7.7e-15 |
| 566 | 232.94 | 0.00033089 | 214 | 97  | 214 | 2 | 21 | 0 | 2.8e-15 | 7.2e-15 |
| 567 | 232.94 | 0.00066177 | 216 | 98  | 216 | 2 | 21 | 0 | 7.6e-15 | 1.1e-14 |
| 568 | 232.94 | 0.00066177 | 218 | 99  | 218 | 2 | 21 | 0 | 5.1e-15 | 9.7e-15 |
| 569 | 232.94 | 0.00066177 | 220 | 100 | 220 | 2 | 21 | 0 | 3.7e-15 | 1.1e-14 |
| 570 | 232.94 | 0.00066177 | 222 | 101 | 222 | 2 | 21 | 0 | 7.4e-15 | 1.1e-14 |
| 571 | 232.94 | 0.00066177 | 224 | 102 | 224 | 2 | 21 | 0 | 7.9e-15 | 1e-14   |
| 572 | 232.94 | 0.0013235  | 226 | 103 | 226 | 2 | 21 | 0 | 6.3e-15 | 1.8e-14 |
| 573 | 232.94 | 0.0013235  | 228 | 104 | 228 | 2 | 21 | 0 | 6.4e-15 | 1.5e-14 |
| 574 | 232.94 | 0.0013235  | 230 | 105 | 230 | 2 | 21 | 0 | 6.6e-15 | 1.6e-14 |
| 575 | 232.95 | 0.0013235  | 232 | 106 | 232 | 2 | 21 | 0 | 7e-15   | 1.7e-14 |
| 576 | 232.95 | 0.0013235  | 234 | 107 | 234 | 2 | 21 | 0 | 7.9e-15 | 1.6e-14 |
| 577 | 232.95 | 0.0013235  | 236 | 108 | 236 | 2 | 21 | 0 | 6e-15   | 1.6e-14 |
| 578 | 232.95 | 0.0026471  | 238 | 109 | 238 | 2 | 21 | 0 | 8.1e-15 | 2.8e-14 |
| -   | 232.95 | - out      |     |     |     |   |    |   |         |         |
| 579 | 232.95 | 0.0026471  | 240 | 110 | 240 | 2 | 21 | 0 | 8.2e-15 | 2.4e-14 |

|     |        |           |     |     |     |   |    |   |         |         |
|-----|--------|-----------|-----|-----|-----|---|----|---|---------|---------|
| 580 | 232.96 | 0.0026471 | 242 | 111 | 242 | 2 | 21 | 0 | 8.5e-15 | 2.9e-14 |
| 581 | 232.96 | 0.0026471 | 244 | 112 | 244 | 2 | 21 | 0 | 4e-15   | 2.9e-14 |
| 582 | 232.96 | 0.0026471 | 246 | 113 | 246 | 2 | 21 | 0 | 1.1e-14 | 3.1e-14 |
| 583 | 232.96 | 0.0026471 | 248 | 114 | 248 | 2 | 21 | 0 | 8.4e-15 | 2.9e-14 |
| 584 | 232.97 | 0.0026471 | 250 | 115 | 250 | 2 | 21 | 0 | 7.3e-15 | 2.7e-14 |
| 585 | 232.97 | 0.0026471 | 252 | 116 | 252 | 2 | 21 | 0 | 5.3e-15 | 2.6e-14 |
| 586 | 232.97 | 0.0026471 | 254 | 117 | 254 | 2 | 21 | 0 | 6.1e-15 | 2.3e-14 |
| 587 | 232.97 | 0.0026471 | 256 | 118 | 256 | 2 | 21 | 0 | 6.7e-15 | 2.4e-14 |
| 588 | 232.98 | 0.0026471 | 258 | 119 | 258 | 2 | 21 | 0 | 5.3e-15 | 2.5e-14 |
| 589 | 232.98 | 0.0026471 | 260 | 120 | 260 | 2 | 21 | 0 | 6.7e-15 | 2.6e-14 |
| -   | 232.98 | -         | out |     |     |   |    |   |         |         |
| 590 | 232.98 | 0.0026471 | 262 | 121 | 262 | 2 | 21 | 0 | 7.1e-15 | 2.7e-14 |
| 591 | 232.98 | 0.0026471 | 264 | 122 | 264 | 2 | 21 | 0 | 5.5e-15 | 2.7e-14 |
| 592 | 232.99 | 0.0052942 | 266 | 123 | 266 | 2 | 21 | 0 | 6.2e-15 | 4.3e-14 |
| 593 | 233    | 0.0052942 | 268 | 124 | 268 | 2 | 21 | 0 | 8.5e-15 | 3.2e-14 |
| 594 | 233    | 0.0052942 | 270 | 125 | 270 | 2 | 21 | 0 | 9.7e-15 | 3.4e-14 |
| 595 | 233.01 | 0.0052942 | 272 | 126 | 272 | 2 | 21 | 0 | 9.7e-15 | 2.5e-14 |
| -   | 233.01 | -         | out |     |     |   |    |   |         |         |
| 596 | 233.01 | 0.0052942 | 274 | 127 | 274 | 2 | 21 | 0 | 8.1e-15 | 1.7e-14 |
| 597 | 233.02 | 0.0052942 | 276 | 128 | 276 | 2 | 21 | 0 | 5.4e-15 | 1.9e-14 |
| 598 | 233.03 | 0.010588  | 278 | 129 | 278 | 2 | 21 | 0 | 2.3e-14 | 1.5e-14 |
| -   | 233.04 | -         | out |     |     |   |    |   |         |         |
| 599 | 233.04 | 0.010588  | 280 | 130 | 280 | 2 | 21 | 0 | 2.3e-14 | 5.2e-15 |
| 600 | 233.06 | 0.021177  | 282 | 131 | 282 | 2 | 21 | 0 | 2e-14   | 4.4e-15 |
| -   | 233.06 | -         | out |     |     |   |    |   |         |         |
| 601 | 233.08 | 0.021177  | 284 | 132 | 284 | 2 | 21 | 0 | 4.2e-13 | 3.7e-15 |
| -   | 233.09 | -         | out |     |     |   |    |   |         |         |
| 602 | 233.1  | 0.021177  | 286 | 133 | 286 | 2 | 21 | 0 | 1e-13   | 5.2e-15 |
| -   | 233.12 | -         | out |     |     |   |    |   |         |         |
| 603 | 233.12 | 0.021177  | 288 | 134 | 288 | 2 | 21 | 0 | 2e-13   | 7.5e-15 |
| 604 | 233.14 | 0.021177  | 290 | 135 | 290 | 2 | 21 | 0 | 5.7e-13 | 1.9e-14 |
| -   | 233.15 | -         | out |     |     |   |    |   |         |         |
| 605 | 233.16 | 0.021177  | 292 | 136 | 292 | 2 | 21 | 0 | 3.6e-14 | 1.4e-14 |
| -   | 233.17 | -         | out |     |     |   |    |   |         |         |
| 606 | 233.19 | 0.021177  | 294 | 137 | 294 | 2 | 21 | 0 | 4.6e-12 | 2.7e-14 |
| -   | 233.2  | -         | out |     |     |   |    |   |         |         |
| 607 | 233.21 | 0.021177  | 296 | 138 | 296 | 2 | 21 | 0 | 6.5e-13 | 1.3e-14 |
| -   | 233.23 | -         | out |     |     |   |    |   |         |         |
| 608 | 233.23 | 0.021177  | 298 | 139 | 298 | 2 | 21 | 0 | 1e-12   | 2.5e-14 |
| 609 | 233.25 | 0.021177  | 300 | 140 | 300 | 2 | 21 | 0 | 6.8e-13 | 4.7e-14 |
| -   | 233.26 | -         | out |     |     |   |    |   |         |         |
| 610 | 233.27 | 0.021177  | 302 | 141 | 302 | 2 | 21 | 0 | 1.6e-13 | 5e-14   |
| -   | 233.28 | -         | out |     |     |   |    |   |         |         |
| 611 | 233.29 | 0.021177  | 304 | 142 | 304 | 2 | 21 | 0 | 3.9e-13 | 4.2e-14 |
| -   | 233.31 | -         | out |     |     |   |    |   |         |         |
| 612 | 233.31 | 0.021177  | 306 | 143 | 306 | 2 | 21 | 0 | 4.7e-13 | 3.3e-14 |
| 613 | 233.33 | 0.021177  | 308 | 144 | 308 | 2 | 21 | 0 | 8.1e-14 | 2.8e-14 |
| -   | 233.34 | -         | out |     |     |   |    |   |         |         |
| 614 | 233.36 | 0.021177  | 310 | 145 | 310 | 2 | 21 | 0 | 1.4e-12 | 3.4e-14 |
| -   | 233.37 | -         | out |     |     |   |    |   |         |         |
| 615 | 233.38 | 0.021177  | 312 | 146 | 312 | 2 | 21 | 0 | 4.6e-13 | 3.6e-14 |
| -   | 233.39 | -         | out |     |     |   |    |   |         |         |
| 616 | 233.4  | 0.021177  | 314 | 147 | 314 | 2 | 21 | 0 | 2.3e-13 | 2.1e-14 |
| 617 | 233.42 | 0.021177  | 316 | 148 | 316 | 2 | 21 | 0 | 1.7e-13 | 2.6e-14 |
| -   | 233.42 | -         | out |     |     |   |    |   |         |         |
| 618 | 233.44 | 0.021177  | 318 | 149 | 318 | 2 | 21 | 0 | 8.6e-13 | 2.9e-14 |

|     |        |           |     |     |     |   |    |   |         |         |  |
|-----|--------|-----------|-----|-----|-----|---|----|---|---------|---------|--|
| -   | 233.45 | - out     |     |     |     |   |    |   |         |         |  |
| 619 | 233.46 | 0.021177  | 320 | 150 | 320 | 2 | 21 | 0 | 9.6e-13 | 4.1e-14 |  |
| -   | 233.48 | - out     |     |     |     |   |    |   |         |         |  |
| 620 | 233.48 | 0.021177  | 322 | 151 | 322 | 2 | 21 | 0 | 4.1e-13 | 5.4e-14 |  |
| -   | 233.5  | - out     |     |     |     |   |    |   |         |         |  |
| 621 | 233.5  | 0.021177  | 324 | 152 | 324 | 2 | 21 | 0 | 1.7e-12 | 2.6e-14 |  |
| 622 | 233.52 | 0.021177  | 326 | 153 | 326 | 2 | 21 | 0 | 1.6e-13 | 3.8e-14 |  |
| -   | 233.53 | - out     |     |     |     |   |    |   |         |         |  |
| 623 | 233.55 | 0.021177  | 328 | 154 | 328 | 2 | 21 | 0 | 3.1e-13 | 3.2e-14 |  |
| -   | 233.56 | - out     |     |     |     |   |    |   |         |         |  |
| 624 | 233.57 | 0.021177  | 330 | 155 | 330 | 2 | 21 | 0 | 1.1e-12 | 2.7e-14 |  |
| -   | 233.59 | - out     |     |     |     |   |    |   |         |         |  |
| 625 | 233.59 | 0.021177  | 332 | 156 | 332 | 2 | 21 | 0 | 1.3e-12 | 2.2e-14 |  |
| 626 | 233.61 | 0.021177  | 334 | 157 | 334 | 2 | 21 | 0 | 1.1e-12 | 2e-14   |  |
| -   | 233.61 | - out     |     |     |     |   |    |   |         |         |  |
| 627 | 233.63 | 0.021177  | 336 | 158 | 336 | 2 | 21 | 0 | 6.4e-13 | 1.6e-14 |  |
| -   | 233.64 | - out     |     |     |     |   |    |   |         |         |  |
| 628 | 233.65 | 0.021177  | 338 | 159 | 338 | 2 | 21 | 0 | 1.3e-12 | 1.5e-14 |  |
| -   | 233.67 | - out     |     |     |     |   |    |   |         |         |  |
| 629 | 233.67 | 0.021177  | 340 | 160 | 340 | 2 | 21 | 0 | 4.7e-12 | 1.2e-14 |  |
| 630 | 233.69 | 0.021177  | 342 | 161 | 342 | 2 | 21 | 0 | 1.8e-12 | 9.8e-15 |  |
| -   | 233.7  | - out     |     |     |     |   |    |   |         |         |  |
| 631 | 233.72 | 0.021177  | 344 | 162 | 344 | 2 | 21 | 0 | 8.6e-13 | 6.8e-15 |  |
| -   | 233.72 | - out     |     |     |     |   |    |   |         |         |  |
| 632 | 233.74 | 0.021177  | 346 | 163 | 346 | 2 | 21 | 0 | 8.2e-12 | 9.3e-15 |  |
| 633 | 233.75 | 0.011194  | 350 | 165 | 350 | 2 | 22 | 0 | 6.1e-13 | 2.8e-15 |  |
| -   | 233.75 | - out     |     |     |     |   |    |   |         |         |  |
| 634 | 233.75 | 0.0069539 | 354 | 167 | 354 | 2 | 23 | 0 | 1.4e-12 | 3e-15   |  |
| 635 | 233.76 | 0.0062585 | 356 | 168 | 356 | 2 | 23 | 0 | 1.2e-12 | 2.3e-15 |  |
| 636 | 233.77 | 0.0062585 | 358 | 169 | 358 | 2 | 23 | 0 | 8.6e-13 | 1.9e-15 |  |
| 637 | 233.77 | 0.0056327 | 360 | 170 | 360 | 2 | 23 | 0 | 2.8e-14 | 2.5e-14 |  |
| -   | 233.78 | - out     |     |     |     |   |    |   |         |         |  |
| 638 | 233.78 | 0.0056327 | 362 | 171 | 362 | 2 | 23 | 0 | 1.5e-14 | 1.9e-14 |  |
| 639 | 233.78 | 0.0056327 | 364 | 172 | 364 | 2 | 23 | 0 | 2.5e-14 | 1.3e-14 |  |
| 640 | 233.8  | 0.011265  | 366 | 173 | 366 | 2 | 23 | 0 | 1.8e-13 | 1.4e-14 |  |
| -   | 233.81 | - out     |     |     |     |   |    |   |         |         |  |
| 641 | 233.81 | 0.011265  | 368 | 174 | 368 | 2 | 23 | 0 | 7.5e-13 | 9.5e-15 |  |
| 642 | 233.83 | 0.022531  | 370 | 175 | 370 | 2 | 23 | 0 | 3.2e-12 | 1.7e-14 |  |
| -   | 233.83 | - out     |     |     |     |   |    |   |         |         |  |
| 643 | 233.85 | 0.022531  | 372 | 176 | 372 | 2 | 23 | 0 | 9.3e-13 | 1.4e-14 |  |

Number of vertex elements: 3  
 Number of boundary elements: 112  
 Number of vertex elements: 3  
 Number of boundary elements: 112  
 Number of elements: 534  
 Minimum element quality: 0.5661  
 Number of vertex elements: 4  
 Number of boundary elements: 162  
 Number of vertex elements: 5  
 Number of boundary elements: 212  
 Number of vertex elements: 6  
 Number of boundary elements: 266  
 Minimum element quality: 0.5535  
 Geometry shape function: Linear Lagrange  
 Time interval 9  
 Time-dependent solver (BDF)

Number of degrees of freedom solved for: 11758 (plus 7124 internal DOFs).

Nonsymmetric matrix found.

Scales for dependent variables:

Concentration (compl.cOx): 2.8

Concentration (compl.cRed): 5.1

Spatial mesh displacement (compl.spatial.disp): 6.9e-08

| Step | Time   | Stepsize | Res | Jac | Sol | Order | Tfail | NLfail | LinErr  | LinRes  |
|------|--------|----------|-----|-----|-----|-------|-------|--------|---------|---------|
| -    | 233.83 | - out    |     |     |     |       |       |        |         |         |
| -    | 233.83 | - out    |     |     |     |       |       |        |         |         |
| 644  | 233.85 | 0.022531 | 2   | 2   | 2   | 1     | 0     | 0      | 7.1e-13 | 8.3e-16 |
| -    | 233.86 | - out    |     |     |     |       |       |        |         |         |
| 645  | 233.87 | 0.022531 | 4   | 3   | 4   | 1     | 0     | 0      | 2.1e-12 | 1e-14   |
| -    | 233.89 | - out    |     |     |     |       |       |        |         |         |
| -    | 233.92 | - out    |     |     |     |       |       |        |         |         |
| 646  | 233.92 | 0.045061 | 6   | 4   | 6   | 2     | 0     | 0      | 4.6e-13 | 1.5e-14 |
| -    | 233.94 | - out    |     |     |     |       |       |        |         |         |
| 647  | 233.96 | 0.045061 | 8   | 5   | 8   | 2     | 0     | 0      | 7.6e-12 | 1.6e-14 |
| -    | 233.97 | - out    |     |     |     |       |       |        |         |         |
| -    | 234    | - out    |     |     |     |       |       |        |         |         |
| 648  | 234.01 | 0.045061 | 10  | 6   | 10  | 2     | 0     | 0      | 1.6e-11 | 4.3e-14 |
| -    | 234.03 | - out    |     |     |     |       |       |        |         |         |
| -    | 234.05 | - out    |     |     |     |       |       |        |         |         |
| 649  | 234.05 | 0.045061 | 12  | 7   | 12  | 2     | 0     | 0      | 7.3e-13 | 3e-14   |
| -    | 234.08 | - out    |     |     |     |       |       |        |         |         |
| 650  | 234.1  | 0.045061 | 14  | 8   | 14  | 2     | 0     | 0      | 5.7e-12 | 3.5e-14 |
| -    | 234.11 | - out    |     |     |     |       |       |        |         |         |
| -    | 234.14 | - out    |     |     |     |       |       |        |         |         |
| 651  | 234.14 | 0.040555 | 16  | 9   | 16  | 2     | 0     | 0      | 7e-13   | 1.9e-14 |
| -    | 234.16 | - out    |     |     |     |       |       |        |         |         |
| 652  | 234.18 | 0.0365   | 18  | 10  | 18  | 2     | 0     | 0      | 3.3e-13 | 2.5e-14 |
| -    | 234.19 | - out    |     |     |     |       |       |        |         |         |
| 653  | 234.21 | 0.0365   | 20  | 11  | 20  | 2     | 0     | 0      | 3e-13   | 3.1e-14 |
| -    | 234.22 | - out    |     |     |     |       |       |        |         |         |
| -    | 234.25 | - out    |     |     |     |       |       |        |         |         |
| 654  | 234.25 | 0.03285  | 22  | 12  | 22  | 2     | 0     | 0      | 6.8e-12 | 3.7e-14 |
| -    | 234.27 | - out    |     |     |     |       |       |        |         |         |
| 655  | 234.28 | 0.03285  | 24  | 13  | 24  | 2     | 0     | 0      | 9.5e-13 | 4.9e-14 |
| -    | 234.3  | - out    |     |     |     |       |       |        |         |         |
| 656  | 234.31 | 0.03285  | 26  | 14  | 26  | 2     | 0     | 0      | 2.7e-12 | 5e-14   |
| -    | 234.33 | - out    |     |     |     |       |       |        |         |         |
| 657  | 234.34 | 0.03285  | 28  | 15  | 28  | 2     | 0     | 0      | 1.9e-12 | 3.2e-14 |
| -    | 234.36 | - out    |     |     |     |       |       |        |         |         |
| 658  | 234.38 | 0.03285  | 30  | 16  | 30  | 2     | 0     | 0      | 1.6e-12 | 6e-14   |
| -    | 234.38 | - out    |     |     |     |       |       |        |         |         |
| -    | 234.41 | - out    |     |     |     |       |       |        |         |         |
| 659  | 234.41 | 0.03285  | 32  | 17  | 32  | 2     | 0     | 0      | 2.3e-12 | 4.8e-14 |
| -    | 234.44 | - out    |     |     |     |       |       |        |         |         |
| 660  | 234.44 | 0.03285  | 34  | 18  | 34  | 2     | 0     | 0      | 1.2e-12 | 4e-14   |
| -    | 234.47 | - out    |     |     |     |       |       |        |         |         |
| 661  | 234.48 | 0.03285  | 36  | 19  | 36  | 2     | 0     | 0      | 2.1e-13 | 2.3e-14 |
| -    | 234.49 | - out    |     |     |     |       |       |        |         |         |
| 662  | 234.51 | 0.03285  | 38  | 20  | 38  | 2     | 0     | 0      | 4.3e-12 | 9.6e-15 |
| -    | 234.52 | - out    |     |     |     |       |       |        |         |         |
| 663  | 234.54 | 0.03285  | 40  | 21  | 40  | 2     | 0     | 0      | 1.5e-12 | 9.8e-15 |
| -    | 234.55 | - out    |     |     |     |       |       |        |         |         |
| 664  | 234.57 | 0.03285  | 42  | 22  | 42  | 2     | 0     | 0      | 3.8e-13 | 6.4e-15 |

|     |        |            |     |    |     |   |   |   |         |         |  |
|-----|--------|------------|-----|----|-----|---|---|---|---------|---------|--|
| -   | 234.58 | - out      |     |    |     |   |   |   |         |         |  |
| -   | 234.6  | - out      |     |    |     |   |   |   |         |         |  |
| 665 | 234.61 | 0.03285    | 44  | 23 | 44  | 2 | 0 | 0 | 9.9e-13 | 4.7e-15 |  |
| -   | 234.63 | - out      |     |    |     |   |   |   |         |         |  |
| 666 | 234.64 | 0.03285    | 46  | 24 | 46  | 2 | 0 | 0 | 4.1e-13 | 4.7e-15 |  |
| -   | 234.66 | - out      |     |    |     |   |   |   |         |         |  |
| 667 | 234.67 | 0.03285    | 48  | 25 | 48  | 2 | 0 | 0 | 3.9e-13 | 4.2e-15 |  |
| -   | 234.69 | - out      |     |    |     |   |   |   |         |         |  |
| 668 | 234.71 | 0.03285    | 50  | 26 | 50  | 2 | 0 | 0 | 1.1e-13 | 5.7e-15 |  |
| -   | 234.71 | - out      |     |    |     |   |   |   |         |         |  |
| 669 | 234.74 | 0.03285    | 52  | 27 | 52  | 2 | 0 | 0 | 5.8e-14 | 6.3e-15 |  |
| -   | 234.74 | - out      |     |    |     |   |   |   |         |         |  |
| -   | 234.77 | - out      |     |    |     |   |   |   |         |         |  |
| 670 | 234.77 | 0.03285    | 54  | 28 | 54  | 2 | 0 | 0 | 7.5e-13 | 9.6e-15 |  |
| -   | 234.8  | - out      |     |    |     |   |   |   |         |         |  |
| 671 | 234.8  | 0.03285    | 56  | 29 | 56  | 2 | 0 | 0 | 1.3e-13 | 6.9e-15 |  |
| -   | 234.82 | - out      |     |    |     |   |   |   |         |         |  |
| 672 | 234.84 | 0.03285    | 58  | 30 | 58  | 2 | 0 | 0 | 1e-13   | 8.4e-15 |  |
| -   | 234.85 | - out      |     |    |     |   |   |   |         |         |  |
| 673 | 234.87 | 0.03285    | 60  | 31 | 60  | 2 | 0 | 0 | 4.8e-14 | 1.1e-14 |  |
| -   | 234.88 | - out      |     |    |     |   |   |   |         |         |  |
| -   | 234.91 | - out      |     |    |     |   |   |   |         |         |  |
| -   | 234.93 | - out      |     |    |     |   |   |   |         |         |  |
| 674 | 234.94 | 0.0657     | 62  | 32 | 62  | 2 | 0 | 0 | 7.3e-14 | 9.4e-15 |  |
| -   | 234.96 | - out      |     |    |     |   |   |   |         |         |  |
| -   | 234.99 | - out      |     |    |     |   |   |   |         |         |  |
| 675 | 235    | 0.0657     | 64  | 33 | 64  | 2 | 0 | 0 | 3.5e-13 | 1.2e-14 |  |
| -   | 235.02 | - out      |     |    |     |   |   |   |         |         |  |
| 676 | 235.02 | 0.014872   | 71  | 35 | 71  | 2 | 1 | 0 | 6e-14   | 9.6e-15 |  |
| 677 | 235.02 | 0.0018589  | 82  | 38 | 82  | 2 | 3 | 0 | 1.5e-14 | 1.7e-14 |  |
| 678 | 235.02 | 0.0037179  | 83  | 39 | 83  | 2 | 3 | 0 | 2.6e-14 | 3.1e-14 |  |
| 679 | 235.02 | 0.00011618 | 98  | 43 | 98  | 1 | 6 | 0 | 4.1e-15 | 2.6e-15 |  |
| 680 | 235.02 | 0.00023237 | 99  | 44 | 99  | 1 | 6 | 0 | 2.2e-14 | 1.7e-15 |  |
| 681 | 235.02 | 2.9046e-05 | 115 | 47 | 115 | 1 | 8 | 0 | 2.8e-14 | 1.4e-14 |  |
| 682 | 235.02 | 9.878e-06  | 120 | 49 | 120 | 1 | 9 | 0 | 3.2e-14 | 2.1e-14 |  |
| 683 | 235.02 | 9.878e-06  | 122 | 50 | 122 | 1 | 9 | 0 | 4.7e-15 | 8.1e-16 |  |
| 684 | 235.02 | 9.878e-06  | 124 | 51 | 124 | 1 | 9 | 0 | 3.2e-15 | 6.1e-16 |  |
| 685 | 235.02 | 9.878e-06  | 126 | 52 | 126 | 1 | 9 | 0 | 2.2e-15 | 6.6e-16 |  |
| 686 | 235.02 | 1.9756e-05 | 128 | 53 | 128 | 2 | 9 | 0 | 4e-15   | 6.4e-16 |  |
| 687 | 235.02 | 1.9756e-05 | 130 | 54 | 130 | 2 | 9 | 0 | 3.3e-15 | 1e-15   |  |
| 688 | 235.02 | 3.9512e-05 | 132 | 55 | 132 | 2 | 9 | 0 | 2.9e-15 | 7.1e-16 |  |
| 689 | 235.02 | 3.9512e-05 | 134 | 56 | 134 | 2 | 9 | 0 | 2.4e-15 | 7e-16   |  |
| 690 | 235.02 | 3.9512e-05 | 136 | 57 | 136 | 2 | 9 | 0 | 3e-15   | 1.3e-15 |  |
| 691 | 235.02 | 3.9512e-05 | 138 | 58 | 138 | 2 | 9 | 0 | 2e-15   | 8.9e-16 |  |
| 692 | 235.02 | 3.9512e-05 | 140 | 59 | 140 | 2 | 9 | 0 | 2e-15   | 9.2e-16 |  |
| 693 | 235.02 | 7.9024e-05 | 142 | 60 | 142 | 2 | 9 | 0 | 2.9e-15 | 1.5e-15 |  |
| 694 | 235.02 | 7.9024e-05 | 144 | 61 | 144 | 2 | 9 | 0 | 1.8e-15 | 1.4e-15 |  |
| 695 | 235.02 | 7.9024e-05 | 146 | 62 | 146 | 2 | 9 | 0 | 2.3e-15 | 1.3e-15 |  |
| 696 | 235.02 | 7.9024e-05 | 148 | 63 | 148 | 2 | 9 | 0 | 2e-15   | 1.3e-15 |  |
| 697 | 235.02 | 0.00015805 | 150 | 64 | 150 | 2 | 9 | 0 | 3.1e-15 | 2.2e-15 |  |
| 698 | 235.02 | 0.00015805 | 152 | 65 | 152 | 2 | 9 | 0 | 2.9e-15 | 2.7e-15 |  |
| 699 | 235.02 | 0.00015805 | 154 | 66 | 154 | 2 | 9 | 0 | 3.2e-15 | 2.6e-15 |  |
| 700 | 235.02 | 0.00015805 | 156 | 67 | 156 | 2 | 9 | 0 | 8.6e-15 | 2.9e-15 |  |
| 701 | 235.02 | 0.00015805 | 158 | 68 | 158 | 2 | 9 | 0 | 9.2e-15 | 3.5e-15 |  |
| 702 | 235.02 | 0.0003161  | 160 | 69 | 160 | 2 | 9 | 0 | 1.1e-14 | 5.5e-15 |  |
| 703 | 235.02 | 0.0003161  | 162 | 70 | 162 | 2 | 9 | 0 | 4.7e-15 | 6.4e-15 |  |



|     |        |           |     |     |     |   |   |   |         |         |
|-----|--------|-----------|-----|-----|-----|---|---|---|---------|---------|
| 704 | 235.02 | 0.0003161 | 164 | 71  | 164 | 2 | 9 | 0 | 6.8e-15 | 6.7e-15 |
| 705 | 235.03 | 0.0003161 | 166 | 72  | 166 | 2 | 9 | 0 | 5e-15   | 7.3e-15 |
| 706 | 235.03 | 0.0003161 | 168 | 73  | 168 | 2 | 9 | 0 | 4.2e-15 | 7.5e-15 |
| 707 | 235.03 | 0.0003161 | 170 | 74  | 170 | 2 | 9 | 0 | 3.6e-15 | 7.4e-15 |
| 708 | 235.03 | 0.0006322 | 172 | 75  | 172 | 2 | 9 | 0 | 5.8e-15 | 1.3e-14 |
| 709 | 235.03 | 0.0006322 | 174 | 76  | 174 | 2 | 9 | 0 | 1.2e-14 | 1.2e-14 |
| 710 | 235.03 | 0.0006322 | 176 | 77  | 176 | 2 | 9 | 0 | 5.3e-15 | 1.3e-14 |
| 711 | 235.03 | 0.0006322 | 178 | 78  | 178 | 2 | 9 | 0 | 9.4e-15 | 1.3e-14 |
| 712 | 235.03 | 0.0006322 | 180 | 79  | 180 | 2 | 9 | 0 | 5.3e-15 | 1.3e-14 |
| 713 | 235.03 | 0.0012644 | 182 | 80  | 182 | 2 | 9 | 0 | 1.4e-14 | 2.1e-14 |
| 714 | 235.03 | 0.0012644 | 184 | 81  | 184 | 2 | 9 | 0 | 1.1e-14 | 2.2e-14 |
| 715 | 235.03 | 0.0012644 | 186 | 82  | 186 | 2 | 9 | 0 | 1.4e-14 | 2.2e-14 |
| 716 | 235.03 | 0.0012644 | 188 | 83  | 188 | 2 | 9 | 0 | 7.8e-15 | 2.1e-14 |
| 717 | 235.04 | 0.0012644 | 190 | 84  | 190 | 2 | 9 | 0 | 1.1e-14 | 2.1e-14 |
| 718 | 235.04 | 0.0012644 | 192 | 85  | 192 | 2 | 9 | 0 | 6.9e-15 | 2.2e-14 |
| 719 | 235.04 | 0.0025288 | 194 | 86  | 194 | 2 | 9 | 0 | 6.7e-15 | 3.8e-14 |
| 720 | 235.04 | 0.0025288 | 196 | 87  | 196 | 2 | 9 | 0 | 6.9e-15 | 3.4e-14 |
| -   | 235.04 | - out     |     |     |     |   |   |   |         |         |
| 721 | 235.04 | 0.0025288 | 198 | 88  | 198 | 2 | 9 | 0 | 8e-15   | 3.4e-14 |
| 722 | 235.05 | 0.0025288 | 200 | 89  | 200 | 2 | 9 | 0 | 8.6e-15 | 3.2e-14 |
| 723 | 235.05 | 0.0025288 | 202 | 90  | 202 | 2 | 9 | 0 | 9.1e-15 | 3e-14   |
| 724 | 235.05 | 0.0025288 | 204 | 91  | 204 | 2 | 9 | 0 | 7.8e-15 | 2.9e-14 |
| 725 | 235.05 | 0.0025288 | 206 | 92  | 206 | 2 | 9 | 0 | 8.5e-15 | 2.9e-14 |
| 726 | 235.06 | 0.0025288 | 208 | 93  | 208 | 2 | 9 | 0 | 1e-14   | 2.8e-14 |
| 727 | 235.06 | 0.0050576 | 210 | 94  | 210 | 2 | 9 | 0 | 9.9e-15 | 4.7e-14 |
| 728 | 235.07 | 0.0050576 | 212 | 95  | 212 | 2 | 9 | 0 | 9.2e-15 | 4.7e-14 |
| -   | 235.07 | - out     |     |     |     |   |   |   |         |         |
| 729 | 235.07 | 0.0050576 | 214 | 96  | 214 | 2 | 9 | 0 | 8.8e-15 | 4.6e-14 |
| 730 | 235.08 | 0.0050576 | 216 | 97  | 216 | 2 | 9 | 0 | 1.1e-14 | 5e-14   |
| 731 | 235.08 | 0.0050576 | 218 | 98  | 218 | 2 | 9 | 0 | 1.4e-14 | 4.9e-14 |
| 732 | 235.09 | 0.010115  | 220 | 99  | 220 | 2 | 9 | 0 | 4e-14   | 7.1e-14 |
| -   | 235.1  | - out     |     |     |     |   |   |   |         |         |
| 733 | 235.11 | 0.02023   | 222 | 100 | 222 | 1 | 9 | 0 | 6e-14   | 1.7e-14 |
| -   | 235.13 | - out     |     |     |     |   |   |   |         |         |
| 734 | 235.13 | 0.02023   | 224 | 101 | 224 | 1 | 9 | 0 | 8.2e-14 | 1.2e-14 |
| -   | 235.15 | - out     |     |     |     |   |   |   |         |         |
| 735 | 235.15 | 0.02023   | 226 | 102 | 226 | 1 | 9 | 0 | 1e-13   | 1.2e-14 |
| -   | 235.18 | - out     |     |     |     |   |   |   |         |         |
| 736 | 235.19 | 0.04046   | 228 | 103 | 228 | 2 | 9 | 0 | 2.1e-13 | 1.4e-14 |
| -   | 235.21 | - out     |     |     |     |   |   |   |         |         |
| 737 | 235.23 | 0.04046   | 230 | 104 | 230 | 2 | 9 | 0 | 3.7e-13 | 7.5e-15 |
| -   | 235.24 | - out     |     |     |     |   |   |   |         |         |
| -   | 235.26 | - out     |     |     |     |   |   |   |         |         |
| -   | 235.29 | - out     |     |     |     |   |   |   |         |         |
| 738 | 235.31 | 0.080921  | 232 | 105 | 232 | 2 | 9 | 0 | 7.5e-13 | 1.4e-14 |
| -   | 235.32 | - out     |     |     |     |   |   |   |         |         |
| -   | 235.35 | - out     |     |     |     |   |   |   |         |         |
| -   | 235.37 | - out     |     |     |     |   |   |   |         |         |
| 739 | 235.38 | 0.067264  | 234 | 106 | 234 | 2 | 9 | 0 | 1.6e-13 | 1.3e-14 |
| -   | 235.4  | - out     |     |     |     |   |   |   |         |         |
| -   | 235.43 | - out     |     |     |     |   |   |   |         |         |
| 740 | 235.45 | 0.067264  | 236 | 107 | 236 | 2 | 9 | 0 | 3.7e-13 | 1.3e-14 |
| -   | 235.46 | - out     |     |     |     |   |   |   |         |         |
| -   | 235.48 | - out     |     |     |     |   |   |   |         |         |
| 741 | 235.51 | 0.060538  | 238 | 108 | 238 | 2 | 9 | 0 | 1.1e-12 | 1.3e-14 |
| -   | 235.51 | - out     |     |     |     |   |   |   |         |         |

```

-      235.54      - out
-      235.57      - out
742    235.57    0.060538    240  109  240    2    9    0  1.4e-12  1.3e-14
-      235.59      - out
-      235.62      - out
743    235.63    0.060538    242  110  242    2    9    0  2.6e-13  1.3e-14
-      235.65      - out
-      235.68      - out
744    235.69    0.060538    244  111  244    2    9    0  1.2e-13  1.3e-14
-      235.69      - out
745    235.75    0.060538    246  112  246    2    9    0  1.5e-12  1.3e-14
Number of vertex elements: 3
Number of boundary elements: 112
Number of vertex elements: 3
Number of boundary elements: 112
Number of elements: 534
Minimum element quality: 0.5661
Number of vertex elements: 4
Number of boundary elements: 162
Number of vertex elements: 5
Number of boundary elements: 212
Number of vertex elements: 6
Number of boundary elements: 266
Minimum element quality: 0.5661
Geometry shape function: Linear Lagrange
Time interval 10
Time-dependent solver (BDF)
Number of degrees of freedom solved for: 11758 (plus 7124 internal DOFs).
Nonsymmetric matrix found.
Scales for dependent variables:
Concentration (compl.cOx): 3.9
Concentration (compl.cRed): 2.1
Spatial mesh displacement (compl.spatial.disp): 6.9e-08
Step      Time      Stepsize      Res  Jac  Sol Order Tfail NLfail  LinErr  LinRes
-      235.69      - out
-      235.7      - out
746    235.72    0.0275        2   2   2   1   0   0  9.7e-14  4.8e-15
-      235.73      - out
747    235.75    0.0275        4   3   4   1   0   0  2.6e-12  6.4e-15
-      235.76      - out
-      235.79      - out
748    235.8      0.055         6   4   6   2   0   0  1.2e-11  3.6e-15
-      235.81      - out
-      235.84      - out
749    235.86    0.055         8   5   8   2   0   0  4.5e-13  7.1e-15
-      235.87      - out
-      235.9      - out
750    235.91    0.055        10   6  10   2   0   0  3.2e-12   9e-15
-      235.92      - out
-      235.95      - out
751    235.97    0.055        12   7  12   2   0   0  1.1e-12  8.8e-15
-      235.98      - out
-      236.01      - out
752    236.02    0.055        14   8  14   2   0   0  2.9e-13  8.7e-15
-      236.03      - out
-      236.06      - out

```

|     |        |          |    |    |    |   |   |   |         |         |
|-----|--------|----------|----|----|----|---|---|---|---------|---------|
| 753 | 236.08 | 0.055    | 16 | 9  | 16 | 2 | 0 | 0 | 2.5e-12 | 8.3e-15 |
| -   | 236.09 | - out    |    |    |    |   |   |   |         |         |
| -   | 236.12 | - out    |    |    |    |   |   |   |         |         |
| 754 | 236.13 | 0.055    | 18 | 10 | 18 | 2 | 0 | 0 | 3.8e-12 | 8.9e-15 |
| -   | 236.14 | - out    |    |    |    |   |   |   |         |         |
| -   | 236.17 | - out    |    |    |    |   |   |   |         |         |
| 755 | 236.19 | 0.055    | 20 | 11 | 20 | 2 | 0 | 0 | 4.1e-12 | 9.1e-15 |
| -   | 236.2  | - out    |    |    |    |   |   |   |         |         |
| -   | 236.23 | - out    |    |    |    |   |   |   |         |         |
| 756 | 236.24 | 0.055    | 22 | 12 | 22 | 2 | 0 | 0 | 2.7e-12 | 8.3e-15 |
| -   | 236.25 | - out    |    |    |    |   |   |   |         |         |
| -   | 236.28 | - out    |    |    |    |   |   |   |         |         |
| 757 | 236.3  | 0.055    | 24 | 13 | 24 | 2 | 0 | 0 | 2.3e-12 | 8.8e-15 |
| -   | 236.31 | - out    |    |    |    |   |   |   |         |         |
| -   | 236.34 | - out    |    |    |    |   |   |   |         |         |
| 758 | 236.35 | 0.055    | 26 | 14 | 26 | 2 | 0 | 0 | 3.7e-12 | 1.1e-14 |
| -   | 236.36 | - out    |    |    |    |   |   |   |         |         |
| -   | 236.39 | - out    |    |    |    |   |   |   |         |         |
| 759 | 236.41 | 0.055    | 28 | 15 | 28 | 2 | 0 | 0 | 8.3e-12 | 9.2e-15 |
| -   | 236.42 | - out    |    |    |    |   |   |   |         |         |
| -   | 236.45 | - out    |    |    |    |   |   |   |         |         |
| 760 | 236.46 | 0.055    | 30 | 16 | 30 | 2 | 0 | 0 | 1.2e-11 | 9.8e-15 |
| -   | 236.47 | - out    |    |    |    |   |   |   |         |         |
| 761 | 236.49 | 0.027981 | 34 | 18 | 34 | 2 | 1 | 0 | 1.7e-12 | 8.6e-15 |
| -   | 236.5  | - out    |    |    |    |   |   |   |         |         |
| 762 | 236.51 | 0.016064 | 39 | 20 | 39 | 2 | 2 | 0 | 4.5e-12 | 6.4e-15 |

Time-stepping completed.

Geometry shape function: Linear Lagrange

Solution time: 1033 s. (17 minutes, 13 seconds)

Physical memory: 2.51 GB

Virtual memory: 2.62 GB

Ended at May 31, 2023 9:50:38 PM.

----- Time-Dependent Solver 1 in Study 5 (CV 39 to 43)/Solution 10 (sol10) ---->

## Advanced (aDef)

### ASSEMBLY SETTINGS

| Description            | Value |
|------------------------|-------|
| Reuse sparsity pattern | On    |

## Fully Coupled 1 (fc1)

### GENERAL

| Description   | Value                    |
|---------------|--------------------------|
| Linear solver | <a href="#">Direct 1</a> |

### METHOD AND TERMINATION

| Description                  | Value              |
|------------------------------|--------------------|
| Damping factor               | 0.9                |
| Jacobian update              | Once per time step |
| Maximum number of iterations | 8                  |

| Description                    | Value                 |
|--------------------------------|-----------------------|
| Stabilization and acceleration | Anderson acceleration |
| Dimension of iteration space   | 5                     |

#### Automatic Remeshing 1 (ar1)

##### GENERAL

| Description        | Value                      |
|--------------------|----------------------------|
| Remesh in geometry | <a href="#">Geometry 1</a> |

##### CONDITION FOR REMESHING

| Description                  | Value      |
|------------------------------|------------|
| Condition type               | Distortion |
| Stop when distortion exceeds | 1.2        |

##### OUTPUT

| Description | Value                                                                    |
|-------------|--------------------------------------------------------------------------|
| Solution    | <a href="#">Remeshed Solution 5</a>                                      |
| Meshes      | {mesh11, mesh12, mesh13, mesh14, mesh15, mesh16, mesh17, mesh18, mesh19} |

## 8 Results

### 8.1 DATASETS

#### 8.1.1 No Solution

##### SOLUTION

| Description | Value               |
|-------------|---------------------|
| Component   | Component 1 (comp1) |

#### 8.1.2 Revolution 2D 2

##### DATA

| Description | Value                       |
|-------------|-----------------------------|
| Dataset     | <a href="#">No Solution</a> |

##### AXIS DATA

| Description       | Value            |
|-------------------|------------------|
| Axis entry method | Two points       |
| Points            | {{0, 0}, {0, 1}} |

##### REVOLUTION LAYERS

| Description      | Value |
|------------------|-------|
| Start angle      | -90   |
| Revolution angle | 225   |

#### 8.1.3 Grid 1D 1

##### DATA

| Description | Value |
|-------------|-------|
| Function    | All   |
| Refresh     |       |

##### PARAMETER BOUNDS

| Description | Value              |
|-------------|--------------------|
| Name        | t                  |
| Minimum     | 0                  |
| Maximum     | 236.50000000000003 |

##### RESOLUTION

| Description | Value |
|-------------|-------|
| Resolution  | 10000 |

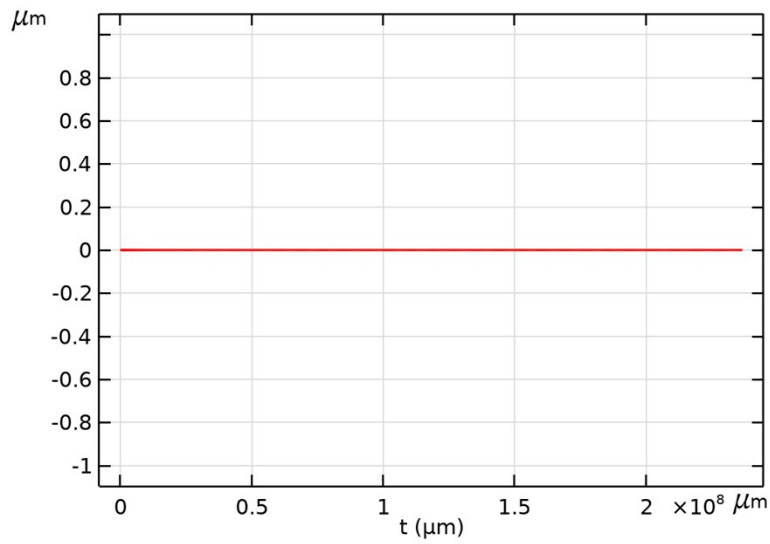

Dataset: Grid 1D 1

### 8.1.4 Study 1 (CV 1 to 39)/Solution 1

SOLUTION

| Description | Value                      |
|-------------|----------------------------|
| Solution    | <a href="#">Solution 1</a> |
| Component   | Component 1 (comp1)        |

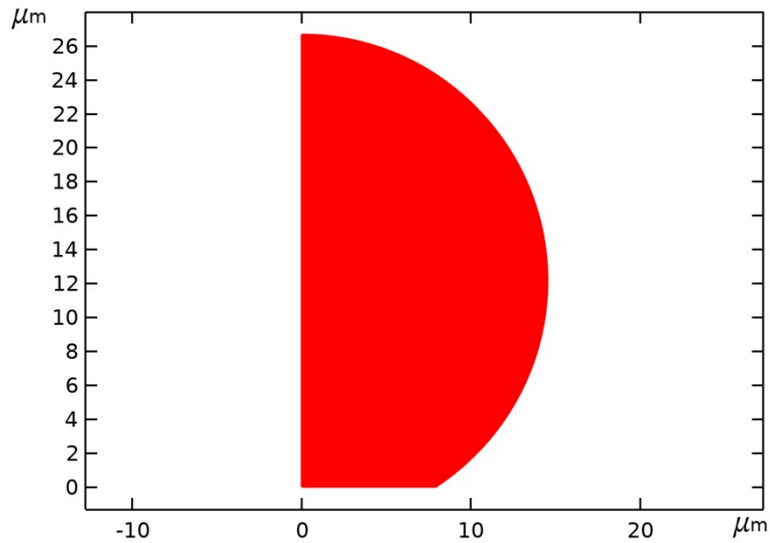

Dataset: Study 1 (CV 1 to 39)/Solution 1

### 8.1.5 Study 1 (CV 1 to 39)/Remeshed Solution 1

SOLUTION

| Description | Value                               |
|-------------|-------------------------------------|
| Solution    | <a href="#">Remeshed Solution 1</a> |
| Component   | Component 1 (comp1)                 |

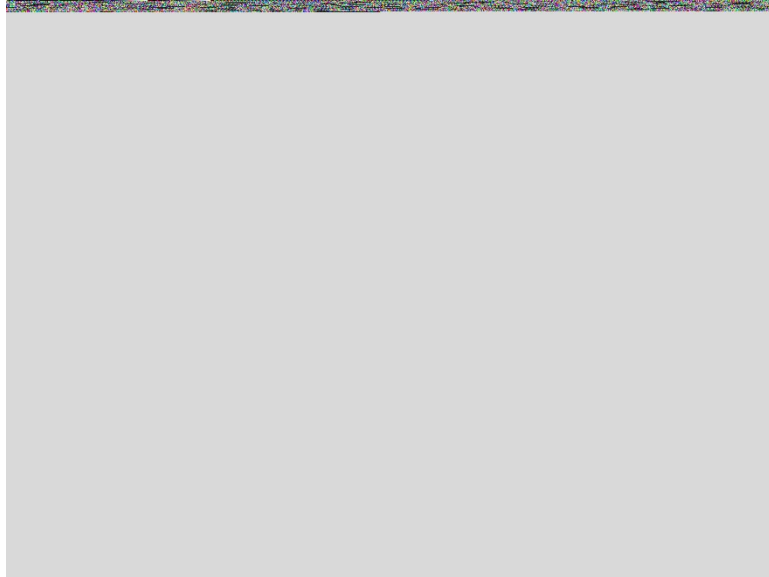

*Dataset: Study 1 (CV 1 to 39)/Remeshed Solution 1*

### 8.1.6 Study 2 (CV 40 to 44)/Solution 4

SOLUTION

| Description | Value                      |
|-------------|----------------------------|
| Solution    | <a href="#">Solution 4</a> |
| Component   | Component 1 (comp1)        |

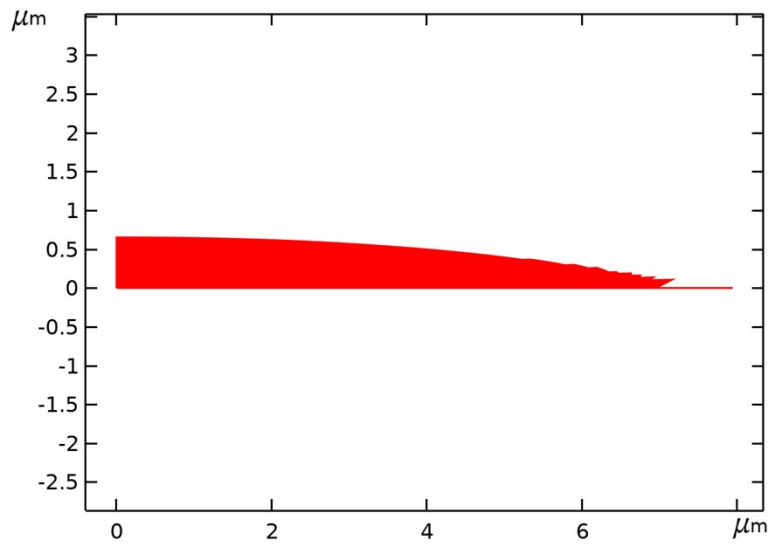

Dataset: Study 2 (CV 40 to 44)/Solution 4

### 8.1.7 Study 2 (CV 40 to 44)/Remeshed Solution 2

#### SOLUTION

| Description | Value                               |
|-------------|-------------------------------------|
| Solution    | <a href="#">Remeshed Solution 2</a> |
| Component   | Component 1 (comp1)                 |

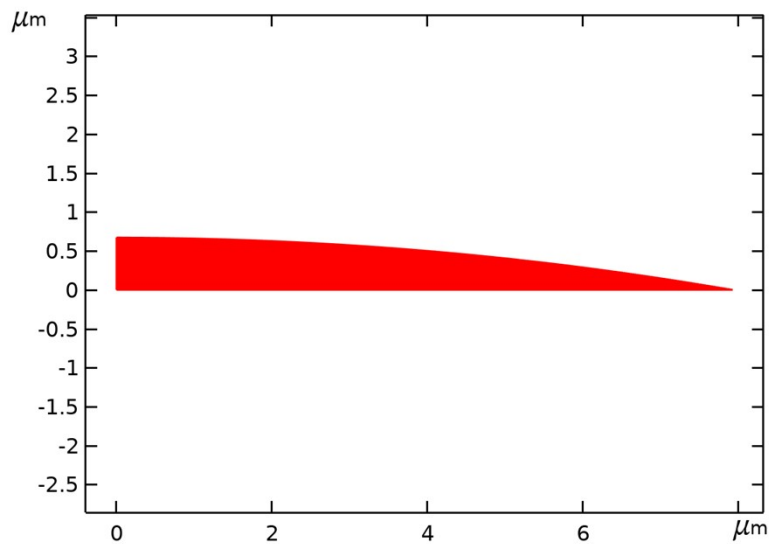

Dataset: Study 2 (CV 40 to 44)/Remeshed Solution 2

### 8.1.8 Revolution 2D 3

#### DATA



| Description | Value                                                     |
|-------------|-----------------------------------------------------------|
| Dataset     | <a href="#">Study 2 (CV 40 to 44)/Remeshed Solution 2</a> |

#### AXIS DATA

| Description       | Value            |
|-------------------|------------------|
| Axis entry method | Two points       |
| Points            | {{0, 0}, {0, 1}} |

#### REVOLUTION LAYERS

| Description      | Value |
|------------------|-------|
| Start angle      | -90   |
| Revolution angle | 225   |

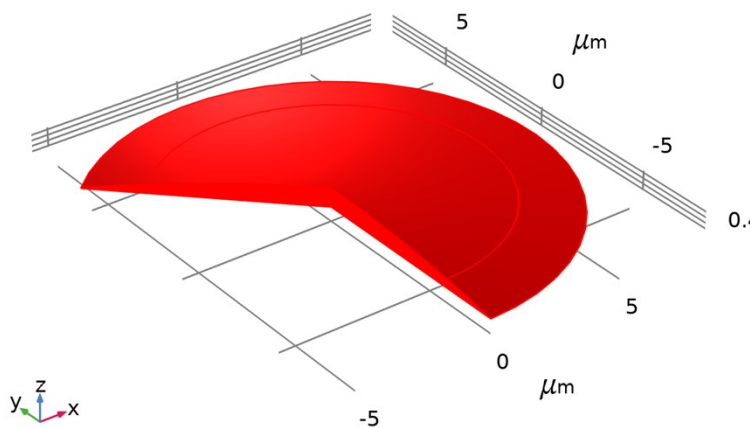

Dataset: Revolution 2D 3

### 8.1.9 Study 3 (CV 21 to 30)/Solution 6

#### SOLUTION

| Description | Value                      |
|-------------|----------------------------|
| Solution    | <a href="#">Solution 6</a> |
| Component   | Component 1 (comp1)        |
| Geometry    | <a href="#">Geometry 1</a> |

### 8.1.10 Revolution 2D 4

#### DATA

| Description | Value |
|-------------|-------|
|-------------|-------|

| Description | Value                                            |
|-------------|--------------------------------------------------|
| Dataset     | <a href="#">Study 3 (CV 21 to 30)/Solution 6</a> |

#### AXIS DATA

| Description       | Value            |
|-------------------|------------------|
| Axis entry method | Two points       |
| Points            | {{0, 0}, {0, 1}} |

#### REVOLUTION LAYERS

| Description      | Value |
|------------------|-------|
| Start angle      | -90   |
| Revolution angle | 225   |

### 8.1.11 Study 3 (CV 21 to 30)/Remeshed Solution 3

#### SOLUTION

| Description | Value                               |
|-------------|-------------------------------------|
| Solution    | <a href="#">Remeshed Solution 3</a> |
| Component   | Component 1 (comp1)                 |
| Geometry    | <a href="#">Geometry 1</a>          |

### 8.1.12 Revolution 2D 5

#### DATA

| Description | Value                                                     |
|-------------|-----------------------------------------------------------|
| Dataset     | <a href="#">Study 3 (CV 21 to 30)/Remeshed Solution 3</a> |

#### AXIS DATA

| Description       | Value            |
|-------------------|------------------|
| Axis entry method | Two points       |
| Points            | {{0, 0}, {0, 1}} |

#### REVOLUTION LAYERS

| Description      | Value |
|------------------|-------|
| Start angle      | -90   |
| Revolution angle | 225   |

### 8.1.13 Study 4 (CV 31 to 38)/Solution 8

#### SOLUTION

| Description | Value |
|-------------|-------|
|-------------|-------|

| Description | Value                      |
|-------------|----------------------------|
| Solution    | <a href="#">Solution 8</a> |
| Component   | Component 1 (comp1)        |
| Geometry    | <a href="#">Geometry 1</a> |

### 8.1.14 Revolution 2D 6

#### DATA

| Description | Value                                            |
|-------------|--------------------------------------------------|
| Dataset     | <a href="#">Study 4 (CV 31 to 38)/Solution 8</a> |

#### AXIS DATA

| Description       | Value            |
|-------------------|------------------|
| Axis entry method | Two points       |
| Points            | {{0, 0}, {0, 1}} |

#### REVOLUTION LAYERS

| Description      | Value |
|------------------|-------|
| Start angle      | -90   |
| Revolution angle | 225   |

### 8.1.15 Study 4 (CV 31 to 38)/Remeshed Solution 4

#### SOLUTION

| Description | Value                               |
|-------------|-------------------------------------|
| Solution    | <a href="#">Remeshed Solution 4</a> |
| Component   | Component 1 (comp1)                 |
| Geometry    | <a href="#">Geometry 1</a>          |

### 8.1.16 Revolution 2D 7

#### DATA

| Description | Value                                                     |
|-------------|-----------------------------------------------------------|
| Dataset     | <a href="#">Study 4 (CV 31 to 38)/Remeshed Solution 4</a> |

#### AXIS DATA

| Description       | Value            |
|-------------------|------------------|
| Axis entry method | Two points       |
| Points            | {{0, 0}, {0, 1}} |

#### REVOLUTION LAYERS

| Description      | Value |
|------------------|-------|
| Start angle      | -90   |
| Revolution angle | 225   |

### 8.1.17 Study 5 (CV 39 to 44)/Solution 10

#### SOLUTION

| Description | Value                       |
|-------------|-----------------------------|
| Solution    | <a href="#">Solution 10</a> |
| Component   | Component 1 (comp1)         |
| Geometry    | <a href="#">Geometry 1</a>  |

### 8.1.18 Study 5 (CV 39 to 44)/Remeshed Solution 5

#### SOLUTION

| Description | Value                               |
|-------------|-------------------------------------|
| Solution    | <a href="#">Remeshed Solution 5</a> |
| Component   | Component 1 (comp1)                 |
| Geometry    | <a href="#">Geometry 1</a>          |

## 8.2 DERIVED VALUES

### 8.2.1 Global Evaluation 1

#### OUTPUT

|              |                          |
|--------------|--------------------------|
| Evaluated in | <a href="#">Table 43</a> |
|--------------|--------------------------|

#### DATA

| Description | Value                                           |
|-------------|-------------------------------------------------|
| Dataset     | <a href="#">Study 1 (CV 1 to 39)/Solution 1</a> |

#### EXPRESSIONS

| Expression                        | Unit | Description |
|-----------------------------------|------|-------------|
| n <sub>Ox</sub> +n <sub>Red</sub> | mol  |             |

## 8.3 TABLES

### 8.3.1 CV-1

| E (V)    | i (nA)    |
|----------|-----------|
| -0.34800 | 0.13920   |
| -0.34300 | -0.043410 |

| <b>E (V)</b> | <b>i (nA)</b> |
|--------------|---------------|
| -0.33800     | -0.0079200    |
| -0.33300     | -0.0031500    |
| -0.32800     | 0.0038200     |
| -0.32300     | 0.012560      |
| -0.31800     | -0.0026300    |
| -0.31300     | 0.010290      |
| -0.30800     | 0.0071100     |
| -0.30300     | 0.013600      |
| -0.29800     | 0.0063000     |
| -0.29300     | 0.0088100     |
| -0.28800     | 0.010100      |
| -0.28300     | 0.011650      |
| -0.27800     | 0.013050      |
| -0.27300     | 0.011560      |
| -0.26800     | 0.013620      |
| -0.26300     | 0.011430      |
| -0.25800     | 0.011560      |
| -0.25300     | 0.0093300     |
| -0.24800     | 0.012660      |
| -0.24300     | 0.012520      |
| -0.23800     | 0.011330      |
| -0.23300     | 0.010720      |
| -0.22800     | 0.012060      |
| -0.22300     | 0.012680      |
| -0.21800     | 0.011400      |
| -0.21300     | 0.013380      |
| -0.20800     | 0.014950      |
| -0.20300     | 0.015550      |
| -0.19800     | 0.014290      |
| -0.19300     | 0.014580      |
| -0.18800     | 0.014940      |
| -0.18300     | 0.014850      |
| -0.17800     | 0.012700      |
| -0.17300     | 0.012360      |
| -0.16800     | 0.013630      |

| <b>E (V)</b> | <b>i (nA)</b> |
|--------------|---------------|
| -0.16300     | 0.013430      |
| -0.15800     | 0.013050      |
| -0.15300     | 0.013040      |
| -0.14800     | 0.013750      |
| -0.14300     | 0.013480      |
| -0.13800     | 0.012220      |
| -0.13300     | 0.012050      |
| -0.12800     | 0.013540      |
| -0.12300     | 0.013620      |
| -0.11800     | 0.012920      |
| -0.11300     | 0.012810      |
| -0.10800     | 0.014730      |
| -0.10300     | 0.014850      |
| -0.098000    | 0.012530      |
| -0.093000    | 0.012060      |
| -0.088000    | 0.013520      |
| -0.083000    | 0.013000      |
| -0.078000    | 0.011720      |
| -0.073000    | 0.012330      |
| -0.068000    | 0.013770      |
| -0.063000    | 0.013460      |
| -0.058000    | 0.010180      |
| -0.053000    | 0.0094300     |
| -0.048000    | 0.011300      |
| -0.043000    | 0.013400      |
| -0.038000    | 0.012050      |
| -0.033000    | 0.011570      |
| -0.028000    | 0.012810      |
| -0.023000    | 0.013460      |
| -0.018000    | 0.012630      |
| -0.013000    | 0.012090      |
| -0.0080000   | 0.014450      |
| -0.0030000   | 0.014220      |
| 0.0020000    | 0.013110      |
| 0.0070000    | 0.012520      |

| <b>E (V)</b> | <b>i (nA)</b> |
|--------------|---------------|
| 0.012000     | 0.014870      |
| 0.017000     | 0.014610      |
| 0.022000     | 0.013350      |
| 0.027000     | 0.013590      |
| 0.032000     | 0.014880      |
| 0.037000     | 0.014890      |
| 0.042000     | 0.013140      |
| 0.047000     | 0.013880      |
| 0.052000     | 0.014270      |
| 0.057000     | 0.015250      |
| 0.062000     | 0.012830      |
| 0.067000     | 0.013580      |
| 0.072000     | 0.014650      |
| 0.077000     | 0.015180      |
| 0.082000     | 0.013160      |
| 0.087000     | 0.013660      |
| 0.092000     | 0.016040      |
| 0.097000     | 0.015160      |
| 0.10200      | 0.014640      |
| 0.10700      | 0.012450      |
| 0.11200      | 0.016300      |
| 0.11700      | 0.014350      |
| 0.12200      | 0.014930      |
| 0.12700      | 0.012800      |
| 0.13200      | 0.015690      |
| 0.13700      | 0.016180      |
| 0.14200      | 0.015040      |
| 0.14700      | 0.015120      |
| 0.15200      | 0.011910      |
| 0.15700      | 0.017280      |
| 0.16200      | 0.010210      |
| 0.16700      | 0.018710      |
| 0.17200      | 0.0095600     |
| 0.17700      | 0.020160      |
| 0.18200      | 0.010080      |

| <b>E (V)</b> | <b>i (nA)</b> |
|--------------|---------------|
| 0.18700      | 0.017110      |
| 0.19200      | 0.027850      |
| 0.19700      | -0.013690     |
| 0.19800      | 0.15587       |
| 0.19300      | -0.041320     |
| 0.18800      | 0.024630      |
| 0.18300      | 0.0073000     |
| 0.17800      | 0.0078400     |
| 0.17300      | 0.010710      |
| 0.16800      | 0.0094400     |
| 0.16300      | 0.013460      |
| 0.15800      | 0.0061300     |
| 0.15300      | 0.0087200     |
| 0.14800      | 0.0083200     |
| 0.14300      | 0.0096600     |
| 0.13800      | 0.0063000     |
| 0.13300      | 0.0067600     |
| 0.12800      | 0.0087700     |
| 0.12300      | 0.0082600     |
| 0.11800      | 0.0067700     |
| 0.11300      | 0.0063300     |
| 0.10800      | 0.0091900     |
| 0.10300      | 0.0076900     |
| 0.098000     | 0.0059100     |
| 0.093000     | 0.0057800     |
| 0.088000     | 0.0077600     |
| 0.083000     | 0.0064500     |
| 0.078000     | 0.0040800     |
| 0.073000     | 0.0038600     |
| 0.068000     | 0.0058100     |
| 0.063000     | 0.0062800     |
| 0.058000     | 0.0036100     |
| 0.053000     | 0.0038700     |
| 0.048000     | 0.0064000     |
| 0.043000     | 0.0050800     |



| <b>E (V)</b> | <b>i (nA)</b> |
|--------------|---------------|
| 0.038000     | 9.2841E-4     |
| 0.033000     | 0.0025500     |
| 0.028000     | 0.0062100     |
| 0.023000     | 0.0062300     |
| 0.018000     | 0.0036800     |
| 0.013000     | 0.0033200     |
| 0.0080000    | 0.0050900     |
| 0.0030000    | 0.0050200     |
| -0.0020000   | 0.0022700     |
| -0.0070000   | 0.0015000     |
| -0.012000    | 0.0034700     |
| -0.017000    | 0.0047500     |
| -0.022000    | 0.0027600     |
| -0.027000    | 0.0028900     |
| -0.032000    | 0.0058700     |
| -0.037000    | 0.0041100     |
| -0.042000    | 0.0059400     |
| -0.047000    | -0.0061100    |
| -0.052000    | 0.053100      |
| -0.057000    | 0.23175       |
| -0.062000    | 0.34425       |
| -0.067000    | 0.35204       |
| -0.072000    | 0.34757       |
| -0.077000    | 0.33564       |
| -0.082000    | 0.32163       |
| -0.087000    | 0.30727       |
| -0.092000    | 0.29292       |
| -0.097000    | 0.27682       |
| -0.10200     | 0.25850       |
| -0.10700     | 0.24298       |
| -0.11200     | 0.22890       |
| -0.11700     | 0.21320       |
| -0.12200     | 0.19702       |
| -0.12700     | 0.18495       |
| -0.13200     | 0.17338       |

| <b>E (V)</b> | <b>i (nA)</b> |
|--------------|---------------|
| -0.13700     | 0.15958       |
| -0.14200     | 0.14771       |
| -0.14700     | 0.13887       |
| -0.15200     | 0.12608       |
| -0.15700     | 0.11108       |
| -0.16200     | 0.099600      |
| -0.16700     | 0.089530      |
| -0.17200     | 0.078820      |
| -0.17700     | 0.068140      |
| -0.18200     | 0.056530      |
| -0.18700     | 0.048440      |
| -0.19200     | 0.044090      |
| -0.19700     | 0.036710      |
| -0.20200     | 0.027730      |
| -0.20700     | 0.022150      |
| -0.21200     | 0.020280      |
| -0.21700     | 0.014600      |
| -0.22200     | 0.0079000     |
| -0.22700     | 0.0046900     |
| -0.23200     | 0.0045900     |
| -0.23700     | 0.0018700     |
| -0.24200     | -0.0036100    |
| -0.24700     | -0.0058100    |
| -0.25200     | -0.0054500    |
| -0.25700     | -0.0066200    |
| -0.26200     | -0.012250     |
| -0.26700     | -0.013420     |
| -0.27200     | -0.013110     |
| -0.27700     | -0.013890     |
| -0.28200     | -0.018410     |
| -0.28700     | -0.018870     |
| -0.29200     | -0.017080     |
| -0.29700     | -0.018820     |
| -0.30200     | -0.020810     |
| -0.30700     | -0.024200     |

| <b>E (V)</b> | <b>i (nA)</b> |
|--------------|---------------|
| -0.31200     | -0.022270     |
| -0.31700     | -0.027440     |
| -0.32200     | -0.025530     |
| -0.32700     | -0.028650     |
| -0.33200     | -0.023930     |
| -0.33700     | -0.029090     |
| -0.34200     | -0.033270     |
| -0.34700     | -0.012170     |

### 8.3.2 CV-2

| <b>E (V)</b> | <b>i (nA)</b> |
|--------------|---------------|
| -0.34800     | -0.075420     |
| -0.34300     | -0.067570     |
| -0.33800     | -0.013970     |
| -0.33300     | -0.028080     |
| -0.32800     | -0.017170     |
| -0.32300     | -0.0085900    |
| -0.31800     | -0.010120     |
| -0.31300     | -0.0032100    |
| -0.30800     | 0.0026400     |
| -0.30300     | 0.018610      |
| -0.29800     | 0.021400      |
| -0.29300     | 0.020340      |
| -0.28800     | 0.022150      |
| -0.28300     | 0.021570      |
| -0.27800     | 0.012680      |
| -0.27300     | 0.012770      |
| -0.26800     | 0.021650      |
| -0.26300     | 0.023230      |
| -0.25800     | 0.020510      |
| -0.25300     | 0.020260      |
| -0.24800     | 0.025890      |
| -0.24300     | 0.029060      |
| -0.23800     | 0.029850      |
| -0.23300     | 0.035690      |

| <b>E (V)</b> | <b>i (nA)</b> |
|--------------|---------------|
| -0.22800     | 0.047190      |
| -0.22300     | 0.050350      |
| -0.21800     | 0.054090      |
| -0.21300     | 0.065280      |
| -0.20800     | 0.070410      |
| -0.20300     | 0.067740      |
| -0.19800     | 0.063130      |
| -0.19300     | 0.062240      |
| -0.18800     | 0.060380      |
| -0.18300     | 0.060890      |
| -0.17800     | 0.065580      |
| -0.17300     | 0.074160      |
| -0.16800     | 0.087430      |
| -0.16300     | 0.097440      |
| -0.15800     | 0.10416       |
| -0.15300     | 0.11516       |
| -0.14800     | 0.12893       |
| -0.14300     | 0.13691       |
| -0.13800     | 0.14280       |
| -0.13300     | 0.15327       |
| -0.12800     | 0.16610       |
| -0.12300     | 0.17396       |
| -0.11800     | 0.17523       |
| -0.11300     | 0.17725       |
| -0.10800     | 0.18446       |
| -0.10300     | 0.19239       |
| -0.098000    | 0.19687       |
| -0.093000    | 0.20097       |
| -0.088000    | 0.20528       |
| -0.083000    | 0.20704       |
| -0.078000    | 0.20594       |
| -0.073000    | 0.20816       |
| -0.068000    | 0.21389       |
| -0.063000    | 0.21508       |
| -0.058000    | 0.21291       |

| <b>E (V)</b> | <b>i (nA)</b> |
|--------------|---------------|
| -0.053000    | 0.21466       |
| -0.048000    | 0.21858       |
| -0.043000    | 0.21732       |
| -0.038000    | 0.21332       |
| -0.033000    | 0.21258       |
| -0.028000    | 0.21516       |
| -0.023000    | 0.21489       |
| -0.018000    | 0.21153       |
| -0.013000    | 0.21108       |
| -0.0080000   | 0.21351       |
| -0.0030000   | 0.21351       |
| 0.0020000    | 0.20998       |
| 0.0070000    | 0.20946       |
| 0.012000     | 0.21172       |
| 0.017000     | 0.21133       |
| 0.022000     | 0.20852       |
| 0.027000     | 0.20902       |
| 0.032000     | 0.21134       |
| 0.037000     | 0.21025       |
| 0.042000     | 0.20712       |
| 0.047000     | 0.20792       |
| 0.052000     | 0.21166       |
| 0.057000     | 0.21109       |
| 0.062000     | 0.20821       |
| 0.067000     | 0.20804       |
| 0.072000     | 0.21187       |
| 0.077000     | 0.21172       |
| 0.082000     | 0.20802       |
| 0.087000     | 0.20791       |
| 0.092000     | 0.21209       |
| 0.097000     | 0.21307       |
| 0.10200      | 0.20982       |
| 0.10700      | 0.21105       |
| 0.11200      | 0.21422       |
| 0.11700      | 0.21591       |

| <b>E (V)</b> | <b>i (nA)</b> |
|--------------|---------------|
| 0.12200      | 0.21432       |
| 0.12700      | 0.21713       |
| 0.13200      | 0.21970       |
| 0.13700      | 0.21965       |
| 0.14200      | 0.21678       |
| 0.14700      | 0.21596       |
| 0.15200      | 0.21991       |
| 0.15700      | 0.21866       |
| 0.16200      | 0.21725       |
| 0.16700      | 0.21383       |
| 0.17200      | 0.22087       |
| 0.17700      | 0.21739       |
| 0.18200      | 0.21721       |
| 0.18700      | 0.21636       |
| 0.19200      | 0.21958       |
| 0.19700      | 0.23171       |
| 0.19800      | 0.16349       |
| 0.19300      | 0.16700       |
| 0.18800      | 0.21852       |
| 0.18300      | 0.20687       |
| 0.17800      | 0.20527       |
| 0.17300      | 0.20724       |
| 0.16800      | 0.20826       |
| 0.16300      | 0.21209       |
| 0.15800      | 0.20606       |
| 0.15300      | 0.20877       |
| 0.14800      | 0.21006       |
| 0.14300      | 0.21098       |
| 0.13800      | 0.20590       |
| 0.13300      | 0.20529       |
| 0.12800      | 0.20794       |
| 0.12300      | 0.20659       |
| 0.11800      | 0.20297       |
| 0.11300      | 0.20150       |
| 0.10800      | 0.20377       |

| <b>E (V)</b> | <b>i (nA)</b> |
|--------------|---------------|
| 0.10300      | 0.20152       |
| 0.098000     | 0.19725       |
| 0.093000     | 0.19489       |
| 0.088000     | 0.19677       |
| 0.083000     | 0.19505       |
| 0.078000     | 0.19005       |
| 0.073000     | 0.18902       |
| 0.068000     | 0.19200       |
| 0.063000     | 0.19150       |
| 0.058000     | 0.18684       |
| 0.053000     | 0.18663       |
| 0.048000     | 0.18927       |
| 0.043000     | 0.18867       |
| 0.038000     | 0.18407       |
| 0.033000     | 0.18364       |
| 0.028000     | 0.18657       |
| 0.023000     | 0.18579       |
| 0.018000     | 0.18195       |
| 0.013000     | 0.18068       |
| 0.0080000    | 0.18309       |
| 0.0030000    | 0.18238       |
| -0.0020000   | 0.17788       |
| -0.0070000   | 0.17633       |
| -0.012000    | 0.17842       |
| -0.017000    | 0.17702       |
| -0.022000    | 0.17215       |
| -0.027000    | 0.17024       |
| -0.032000    | 0.17152       |
| -0.037000    | 0.16781       |
| -0.042000    | 0.15918       |
| -0.047000    | 0.15414       |
| -0.052000    | 0.15277       |
| -0.057000    | 0.14963       |
| -0.062000    | 0.14484       |
| -0.067000    | 0.14515       |

| <b>E (V)</b> | <b>i (nA)</b> |
|--------------|---------------|
| -0.072000    | 0.14917       |
| -0.077000    | 0.15030       |
| -0.082000    | 0.14781       |
| -0.087000    | 0.14634       |
| -0.092000    | 0.14613       |
| -0.097000    | 0.14004       |
| -0.10200     | 0.12831       |
| -0.10700     | 0.11857       |
| -0.11200     | 0.11212       |
| -0.11700     | 0.10177       |
| -0.12200     | 0.088020      |
| -0.12700     | 0.078370      |
| -0.13200     | 0.071650      |
| -0.13700     | 0.060260      |
| -0.14200     | 0.045750      |
| -0.14700     | 0.034970      |
| -0.15200     | 0.028150      |
| -0.15700     | 0.020470      |
| -0.16200     | 0.010070      |
| -0.16700     | 0.0031600     |
| -0.17200     | -0.0010300    |
| -0.17700     | -0.0083200    |
| -0.18200     | -0.018760     |
| -0.18700     | -0.025330     |
| -0.19200     | -0.027210     |
| -0.19700     | -0.032340     |
| -0.20200     | -0.040760     |
| -0.20700     | -0.045280     |
| -0.21200     | -0.045420     |
| -0.21700     | -0.049720     |
| -0.22200     | -0.055800     |
| -0.22700     | -0.058560     |
| -0.23200     | -0.057680     |
| -0.23700     | -0.059590     |
| -0.24200     | -0.064620     |



| <b>E (V)</b> | <b>i (nA)</b> |
|--------------|---------------|
| -0.24700     | -0.066030     |
| -0.25200     | -0.064640     |
| -0.25700     | -0.065080     |
| -0.26200     | -0.069830     |
| -0.26700     | -0.070060     |
| -0.27200     | -0.067700     |
| -0.27700     | -0.067650     |
| -0.28200     | -0.071990     |
| -0.28700     | -0.071470     |
| -0.29200     | -0.067880     |
| -0.29700     | -0.068370     |
| -0.30200     | -0.070210     |
| -0.30700     | -0.070950     |
| -0.31200     | -0.065100     |
| -0.31700     | -0.067290     |
| -0.32200     | -0.067150     |
| -0.32700     | -0.070010     |
| -0.33200     | -0.063330     |
| -0.33700     | -0.064380     |
| -0.34200     | -0.070150     |
| -0.34700     | -0.056390     |

### 8.3.3 CV-3

| <b>E (V)</b> | <b>i (nA)</b> |
|--------------|---------------|
| -0.34800     | -0.10491      |
| -0.34300     | -0.085240     |
| -0.33800     | -0.046030     |
| -0.33300     | -0.052220     |
| -0.32800     | -0.043790     |
| -0.32300     | -0.039920     |
| -0.31800     | -0.043260     |
| -0.31300     | -0.037880     |
| -0.30800     | -0.034180     |
| -0.30300     | -0.029950     |
| -0.29800     | -0.032390     |

| <b>E (V)</b> | <b>i (nA)</b> |
|--------------|---------------|
| -0.29300     | -0.029580     |
| -0.28800     | -0.025720     |
| -0.28300     | -0.023940     |
| -0.27800     | -0.025620     |
| -0.27300     | -0.024240     |
| -0.26800     | -0.018940     |
| -0.26300     | -0.018340     |
| -0.25800     | -0.020340     |
| -0.25300     | -0.019790     |
| -0.24800     | -0.014800     |
| -0.24300     | -0.013940     |
| -0.23800     | -0.015610     |
| -0.23300     | -0.013000     |
| -0.22800     | -0.0064100    |
| -0.22300     | -0.0035900    |
| -0.21800     | -0.0037600    |
| -0.21300     | 3.7406E-4     |
| -0.20800     | 0.0075900     |
| -0.20300     | 0.012410      |
| -0.19800     | 0.014250      |
| -0.19300     | 0.019720      |
| -0.18800     | 0.028510      |
| -0.18300     | 0.035030      |
| -0.17800     | 0.038350      |
| -0.17300     | 0.045340      |
| -0.16800     | 0.056360      |
| -0.16300     | 0.064110      |
| -0.15800     | 0.069190      |
| -0.15300     | 0.078210      |
| -0.14800     | 0.090530      |
| -0.14300     | 0.099220      |
| -0.13800     | 0.10581       |
| -0.13300     | 0.11540       |
| -0.12800     | 0.12751       |
| -0.12300     | 0.13653       |

| <b>E (V)</b> | <b>i (nA)</b> |
|--------------|---------------|
| -0.11800     | 0.14199       |
| -0.11300     | 0.15009       |
| -0.10800     | 0.16102       |
| -0.10300     | 0.16845       |
| -0.098000    | 0.17204       |
| -0.093000    | 0.17804       |
| -0.088000    | 0.18668       |
| -0.083000    | 0.19163       |
| -0.078000    | 0.19175       |
| -0.073000    | 0.19506       |
| -0.068000    | 0.20140       |
| -0.063000    | 0.20315       |
| -0.058000    | 0.20152       |
| -0.053000    | 0.20294       |
| -0.048000    | 0.20729       |
| -0.043000    | 0.20763       |
| -0.038000    | 0.20443       |
| -0.033000    | 0.20428       |
| -0.028000    | 0.20750       |
| -0.023000    | 0.20805       |
| -0.018000    | 0.20523       |
| -0.013000    | 0.20494       |
| -0.0080000   | 0.20825       |
| -0.0030000   | 0.20815       |
| 0.0020000    | 0.20389       |
| 0.0070000    | 0.20375       |
| 0.012000     | 0.20700       |
| 0.017000     | 0.20646       |
| 0.022000     | 0.20257       |
| 0.027000     | 0.20293       |
| 0.032000     | 0.20630       |
| 0.037000     | 0.20604       |
| 0.042000     | 0.20256       |
| 0.047000     | 0.20213       |
| 0.052000     | 0.20557       |

| <b>E (V)</b> | <b>i (nA)</b> |
|--------------|---------------|
| 0.057000     | 0.20528       |
| 0.062000     | 0.20180       |
| 0.067000     | 0.20117       |
| 0.072000     | 0.20448       |
| 0.077000     | 0.20458       |
| 0.082000     | 0.20120       |
| 0.087000     | 0.20092       |
| 0.092000     | 0.20447       |
| 0.097000     | 0.20446       |
| 0.10200      | 0.20058       |
| 0.10700      | 0.20129       |
| 0.11200      | 0.20435       |
| 0.11700      | 0.20455       |
| 0.12200      | 0.20079       |
| 0.12700      | 0.20146       |
| 0.13200      | 0.20413       |
| 0.13700      | 0.20395       |
| 0.14200      | 0.20044       |
| 0.14700      | 0.19985       |
| 0.15200      | 0.20396       |
| 0.15700      | 0.20295       |
| 0.16200      | 0.20071       |
| 0.16700      | 0.19925       |
| 0.17200      | 0.20532       |
| 0.17700      | 0.20296       |
| 0.18200      | 0.20197       |
| 0.18700      | 0.20113       |
| 0.19200      | 0.20369       |
| 0.19700      | 0.21050       |
| 0.19800      | 0.16269       |
| 0.19300      | 0.17323       |
| 0.18800      | 0.19313       |
| 0.18300      | 0.18793       |
| 0.17800      | 0.18417       |
| 0.17300      | 0.18390       |

| <b>E (V)</b> | <b>i (nA)</b> |
|--------------|---------------|
| 0.16800      | 0.18531       |
| 0.16300      | 0.18614       |
| 0.15800      | 0.18114       |
| 0.15300      | 0.18155       |
| 0.14800      | 0.18390       |
| 0.14300      | 0.18375       |
| 0.13800      | 0.17958       |
| 0.13300      | 0.17992       |
| 0.12800      | 0.18293       |
| 0.12300      | 0.18195       |
| 0.11800      | 0.17857       |
| 0.11300      | 0.17812       |
| 0.10800      | 0.18106       |
| 0.10300      | 0.18011       |
| 0.098000     | 0.17660       |
| 0.093000     | 0.17644       |
| 0.088000     | 0.17972       |
| 0.083000     | 0.17923       |
| 0.078000     | 0.17526       |
| 0.073000     | 0.17489       |
| 0.068000     | 0.17856       |
| 0.063000     | 0.17858       |
| 0.058000     | 0.17460       |
| 0.053000     | 0.17439       |
| 0.048000     | 0.17718       |
| 0.043000     | 0.17685       |
| 0.038000     | 0.17303       |
| 0.033000     | 0.17275       |
| 0.028000     | 0.17564       |
| 0.023000     | 0.17513       |
| 0.018000     | 0.17176       |
| 0.013000     | 0.17143       |
| 0.0080000    | 0.17425       |
| 0.0030000    | 0.17388       |
| -0.0020000   | 0.16977       |

| <b>E (V)</b> | <b>i (nA)</b> |
|--------------|---------------|
| -0.0070000   | 0.16867       |
| -0.012000    | 0.17185       |
| -0.017000    | 0.17114       |
| -0.022000    | 0.16611       |
| -0.027000    | 0.16495       |
| -0.032000    | 0.16726       |
| -0.037000    | 0.16493       |
| -0.042000    | 0.15912       |
| -0.047000    | 0.15733       |
| -0.052000    | 0.15789       |
| -0.057000    | 0.15471       |
| -0.062000    | 0.14816       |
| -0.067000    | 0.14428       |
| -0.072000    | 0.14321       |
| -0.077000    | 0.13840       |
| -0.082000    | 0.12908       |
| -0.087000    | 0.12239       |
| -0.092000    | 0.11868       |
| -0.097000    | 0.11072       |
| -0.10200     | 0.098810      |
| -0.10700     | 0.089810      |
| -0.11200     | 0.083630      |
| -0.11700     | 0.073130      |
| -0.12200     | 0.059750      |
| -0.12700     | 0.049740      |
| -0.13200     | 0.042320      |
| -0.13700     | 0.031750      |
| -0.14200     | 0.018130      |
| -0.14700     | 0.0082900     |
| -0.15200     | 0.0017300     |
| -0.15700     | -0.0076900    |
| -0.16200     | -0.019900     |
| -0.16700     | -0.028560     |
| -0.17200     | -0.033180     |
| -0.17700     | -0.040380     |

| <b>E (V)</b> | <b>i (nA)</b> |
|--------------|---------------|
| -0.18200     | -0.051120     |
| -0.18700     | -0.057700     |
| -0.19200     | -0.059630     |
| -0.19700     | -0.064850     |
| -0.20200     | -0.073120     |
| -0.20700     | -0.077190     |
| -0.21200     | -0.077030     |
| -0.21700     | -0.080440     |
| -0.22200     | -0.086400     |
| -0.22700     | -0.088950     |
| -0.23200     | -0.087960     |
| -0.23700     | -0.089460     |
| -0.24200     | -0.094280     |
| -0.24700     | -0.095860     |
| -0.25200     | -0.093780     |
| -0.25700     | -0.094460     |
| -0.26200     | -0.098940     |
| -0.26700     | -0.099400     |
| -0.27200     | -0.096880     |
| -0.27700     | -0.097320     |
| -0.28200     | -0.10159      |
| -0.28700     | -0.10169      |
| -0.29200     | -0.098300     |
| -0.29700     | -0.098920     |
| -0.30200     | -0.10226      |
| -0.30700     | -0.10294      |
| -0.31200     | -0.098770     |
| -0.31700     | -0.10011      |
| -0.32200     | -0.10255      |
| -0.32700     | -0.10390      |
| -0.33200     | -0.099620     |
| -0.33700     | -0.099800     |
| -0.34200     | -0.10449      |
| -0.34700     | -0.098670     |

### 8.3.4 CV-4

| <b>E (V)</b> | <b>i (nA)</b> |
|--------------|---------------|
| -0.34800     | -0.11322      |
| -0.34300     | -0.097870     |
| -0.33800     | -0.086120     |
| -0.33300     | -0.085950     |
| -0.32800     | -0.079650     |
| -0.32300     | -0.077390     |
| -0.31800     | -0.079410     |
| -0.31300     | -0.076750     |
| -0.30800     | -0.072490     |
| -0.30300     | -0.070640     |
| -0.29800     | -0.072750     |
| -0.29300     | -0.071050     |
| -0.28800     | -0.066790     |
| -0.28300     | -0.065280     |
| -0.27800     | -0.067240     |
| -0.27300     | -0.065830     |
| -0.26800     | -0.060660     |
| -0.26300     | -0.059200     |
| -0.25800     | -0.060940     |
| -0.25300     | -0.059250     |
| -0.24800     | -0.053460     |
| -0.24300     | -0.051380     |
| -0.23800     | -0.052440     |
| -0.23300     | -0.049550     |
| -0.22800     | -0.042950     |
| -0.22300     | -0.039450     |
| -0.21800     | -0.038980     |
| -0.21300     | -0.034790     |
| -0.20800     | -0.026960     |
| -0.20300     | -0.021600     |
| -0.19800     | -0.019270     |
| -0.19300     | -0.013670     |
| -0.18800     | -0.0037900    |
| -0.18300     | 0.0037400     |



| <b>E (V)</b> | <b>i (nA)</b> |
|--------------|---------------|
| -0.17800     | 0.0076900     |
| -0.17300     | 0.015860      |
| -0.16800     | 0.028070      |
| -0.16300     | 0.036870      |
| -0.15800     | 0.043000      |
| -0.15300     | 0.053080      |
| -0.14800     | 0.066810      |
| -0.14300     | 0.076980      |
| -0.13800     | 0.084040      |
| -0.13300     | 0.094820      |
| -0.12800     | 0.10868       |
| -0.12300     | 0.11905       |
| -0.11800     | 0.12568       |
| -0.11300     | 0.13479       |
| -0.10800     | 0.14725       |
| -0.10300     | 0.15591       |
| -0.098000    | 0.15979       |
| -0.093000    | 0.16650       |
| -0.088000    | 0.17621       |
| -0.083000    | 0.18142       |
| -0.078000    | 0.18231       |
| -0.073000    | 0.18625       |
| -0.068000    | 0.19269       |
| -0.063000    | 0.19507       |
| -0.058000    | 0.19402       |
| -0.053000    | 0.19574       |
| -0.048000    | 0.20006       |
| -0.043000    | 0.20059       |
| -0.038000    | 0.19786       |
| -0.033000    | 0.19832       |
| -0.028000    | 0.20195       |
| -0.023000    | 0.20199       |
| -0.018000    | 0.19849       |
| -0.013000    | 0.19862       |
| -0.0080000   | 0.20216       |

| <b>E (V)</b> | <b>i (nA)</b> |
|--------------|---------------|
| -0.0030000   | 0.20196       |
| 0.0020000    | 0.19836       |
| 0.0070000    | 0.19863       |
| 0.012000     | 0.20191       |
| 0.017000     | 0.20120       |
| 0.022000     | 0.19725       |
| 0.027000     | 0.19700       |
| 0.032000     | 0.20011       |
| 0.037000     | 0.19983       |
| 0.042000     | 0.19615       |
| 0.047000     | 0.19586       |
| 0.052000     | 0.19890       |
| 0.057000     | 0.19884       |
| 0.062000     | 0.19581       |
| 0.067000     | 0.19543       |
| 0.072000     | 0.19864       |
| 0.077000     | 0.19863       |
| 0.082000     | 0.19501       |
| 0.087000     | 0.19508       |
| 0.092000     | 0.19846       |
| 0.097000     | 0.19802       |
| 0.10200      | 0.19430       |
| 0.10700      | 0.19446       |
| 0.11200      | 0.19759       |
| 0.11700      | 0.19750       |
| 0.12200      | 0.19422       |
| 0.12700      | 0.19455       |
| 0.13200      | 0.19785       |
| 0.13700      | 0.19798       |
| 0.14200      | 0.19458       |
| 0.14700      | 0.19450       |
| 0.15200      | 0.19824       |
| 0.15700      | 0.19823       |
| 0.16200      | 0.19494       |
| 0.16700      | 0.19435       |

| <b>E (V)</b> | <b>i (nA)</b> |
|--------------|---------------|
| 0.17200      | 0.19867       |
| 0.17700      | 0.19788       |
| 0.18200      | 0.19485       |
| 0.18700      | 0.19453       |
| 0.19200      | 0.19805       |
| 0.19700      | 0.19831       |
| 0.19800      | 0.17960       |
| 0.19300      | 0.17781       |
| 0.18800      | 0.18375       |
| 0.18300      | 0.18212       |
| 0.17800      | 0.17796       |
| 0.17300      | 0.17734       |
| 0.16800      | 0.17960       |
| 0.16300      | 0.17938       |
| 0.15800      | 0.17478       |
| 0.15300      | 0.17471       |
| 0.14800      | 0.17751       |
| 0.14300      | 0.17668       |
| 0.13800      | 0.17279       |
| 0.13300      | 0.17294       |
| 0.12800      | 0.17599       |
| 0.12300      | 0.17514       |
| 0.11800      | 0.17139       |
| 0.11300      | 0.17124       |
| 0.10800      | 0.17440       |
| 0.10300      | 0.17391       |
| 0.098000     | 0.17069       |
| 0.093000     | 0.17066       |
| 0.088000     | 0.17347       |
| 0.083000     | 0.17286       |
| 0.078000     | 0.16906       |
| 0.073000     | 0.16884       |
| 0.068000     | 0.17199       |
| 0.063000     | 0.17182       |
| 0.058000     | 0.16814       |

| <b>E (V)</b> | <b>i (nA)</b> |
|--------------|---------------|
| 0.053000     | 0.16779       |
| 0.048000     | 0.17081       |
| 0.043000     | 0.17028       |
| 0.038000     | 0.16676       |
| 0.033000     | 0.16698       |
| 0.028000     | 0.16958       |
| 0.023000     | 0.16867       |
| 0.018000     | 0.16519       |
| 0.013000     | 0.16480       |
| 0.0080000    | 0.16757       |
| 0.0030000    | 0.16704       |
| -0.0020000   | 0.16240       |
| -0.0070000   | 0.16121       |
| -0.012000    | 0.16435       |
| -0.017000    | 0.16326       |
| -0.022000    | 0.15820       |
| -0.027000    | 0.15707       |
| -0.032000    | 0.15901       |
| -0.037000    | 0.15688       |
| -0.042000    | 0.15087       |
| -0.047000    | 0.14834       |
| -0.052000    | 0.14865       |
| -0.057000    | 0.14487       |
| -0.062000    | 0.13751       |
| -0.067000    | 0.13265       |
| -0.072000    | 0.13074       |
| -0.077000    | 0.12514       |
| -0.082000    | 0.11491       |
| -0.087000    | 0.10743       |
| -0.092000    | 0.10275       |
| -0.097000    | 0.093720      |
| -0.10200     | 0.080780      |
| -0.10700     | 0.070700      |
| -0.11200     | 0.063400      |
| -0.11700     | 0.052010      |

| <b>E (V)</b> | <b>i (nA)</b> |
|--------------|---------------|
| -0.12200     | 0.037020      |
| -0.12700     | 0.025770      |
| -0.13200     | 0.017710      |
| -0.13700     | 0.0058500     |
| -0.14200     | -0.0088400    |
| -0.14700     | -0.019580     |
| -0.15200     | -0.026620     |
| -0.15700     | -0.036700     |
| -0.16200     | -0.050120     |
| -0.16700     | -0.059270     |
| -0.17200     | -0.063840     |
| -0.17700     | -0.071250     |
| -0.18200     | -0.082100     |
| -0.18700     | -0.088910     |
| -0.19200     | -0.091120     |
| -0.19700     | -0.096350     |
| -0.20200     | -0.10463      |
| -0.20700     | -0.10879      |
| -0.21200     | -0.10873      |
| -0.21700     | -0.11185      |
| -0.22200     | -0.11784      |
| -0.22700     | -0.11999      |
| -0.23200     | -0.11862      |
| -0.23700     | -0.12025      |
| -0.24200     | -0.12484      |
| -0.24700     | -0.12609      |
| -0.25200     | -0.12386      |
| -0.25700     | -0.12450      |
| -0.26200     | -0.12875      |
| -0.26700     | -0.12899      |
| -0.27200     | -0.12568      |
| -0.27700     | -0.12617      |
| -0.28200     | -0.13018      |
| -0.28700     | -0.13003      |
| -0.29200     | -0.12635      |

| <b>E (V)</b> | <b>i (nA)</b> |
|--------------|---------------|
| -0.29700     | -0.12678      |
| -0.30200     | -0.12991      |
| -0.30700     | -0.12986      |
| -0.31200     | -0.12651      |
| -0.31700     | -0.12687      |
| -0.32200     | -0.12963      |
| -0.32700     | -0.13017      |
| -0.33200     | -0.12655      |
| -0.33700     | -0.12632      |
| -0.34200     | -0.13046      |
| -0.34700     | -0.12711      |

### 8.3.5 CV-5

| <b>E (V)</b> | <b>i (nA)</b> |
|--------------|---------------|
| -0.34800     | -0.12780      |
| -0.34300     | -0.11571      |
| -0.33800     | -0.11220      |
| -0.33300     | -0.10957      |
| -0.32800     | -0.10343      |
| -0.32300     | -0.10167      |
| -0.31800     | -0.10350      |
| -0.31300     | -0.10168      |
| -0.30800     | -0.097030     |
| -0.30300     | -0.095730     |
| -0.29800     | -0.098020     |
| -0.29300     | -0.096710     |
| -0.28800     | -0.091930     |
| -0.28300     | -0.090240     |
| -0.27800     | -0.092350     |
| -0.27300     | -0.091270     |
| -0.26800     | -0.086060     |
| -0.26300     | -0.084210     |
| -0.25800     | -0.086300     |
| -0.25300     | -0.084470     |
| -0.24800     | -0.078890     |

| <b>E (V)</b> | <b>i (nA)</b> |
|--------------|---------------|
| -0.24300     | -0.076880     |
| -0.23800     | -0.077640     |
| -0.23300     | -0.074840     |
| -0.22800     | -0.068780     |
| -0.22300     | -0.065470     |
| -0.21800     | -0.064720     |
| -0.21300     | -0.060700     |
| -0.20800     | -0.052940     |
| -0.20300     | -0.047420     |
| -0.19800     | -0.044960     |
| -0.19300     | -0.038640     |
| -0.18800     | -0.028210     |
| -0.18300     | -0.020700     |
| -0.17800     | -0.016150     |
| -0.17300     | -0.0076600    |
| -0.16800     | 0.0051300     |
| -0.16300     | 0.014760      |
| -0.15800     | 0.021240      |
| -0.15300     | 0.032340      |
| -0.14800     | 0.046830      |
| -0.14300     | 0.057730      |
| -0.13800     | 0.066050      |
| -0.13300     | 0.077880      |
| -0.12800     | 0.092890      |
| -0.12300     | 0.10441       |
| -0.11800     | 0.11208       |
| -0.11300     | 0.12232       |
| -0.10800     | 0.13567       |
| -0.10300     | 0.14529       |
| -0.098000    | 0.15013       |
| -0.093000    | 0.15774       |
| -0.088000    | 0.16803       |
| -0.083000    | 0.17361       |
| -0.078000    | 0.17536       |
| -0.073000    | 0.17997       |

| <b>E (V)</b> | <b>i (nA)</b> |
|--------------|---------------|
| -0.068000    | 0.18681       |
| -0.063000    | 0.18928       |
| -0.058000    | 0.18845       |
| -0.053000    | 0.19045       |
| -0.048000    | 0.19478       |
| -0.043000    | 0.19599       |
| -0.038000    | 0.19336       |
| -0.033000    | 0.19359       |
| -0.028000    | 0.19752       |
| -0.023000    | 0.19738       |
| -0.018000    | 0.19360       |
| -0.013000    | 0.19371       |
| -0.0080000   | 0.19708       |
| -0.0030000   | 0.19690       |
| 0.0020000    | 0.19336       |
| 0.0070000    | 0.19349       |
| 0.012000     | 0.19687       |
| 0.017000     | 0.19611       |
| 0.022000     | 0.19258       |
| 0.027000     | 0.19273       |
| 0.032000     | 0.19537       |
| 0.037000     | 0.19506       |
| 0.042000     | 0.19173       |
| 0.047000     | 0.19139       |
| 0.052000     | 0.19442       |
| 0.057000     | 0.19410       |
| 0.062000     | 0.19052       |
| 0.067000     | 0.19046       |
| 0.072000     | 0.19397       |
| 0.077000     | 0.19397       |
| 0.082000     | 0.19043       |
| 0.087000     | 0.19049       |
| 0.092000     | 0.19389       |
| 0.097000     | 0.19352       |
| 0.10200      | 0.18985       |



| <b>E (V)</b> | <b>i (nA)</b> |
|--------------|---------------|
| 0.10700      | 0.18999       |
| 0.11200      | 0.19324       |
| 0.11700      | 0.19288       |
| 0.12200      | 0.18944       |
| 0.12700      | 0.18934       |
| 0.13200      | 0.19259       |
| 0.13700      | 0.19278       |
| 0.14200      | 0.18933       |
| 0.14700      | 0.18909       |
| 0.15200      | 0.19277       |
| 0.15700      | 0.19319       |
| 0.16200      | 0.18940       |
| 0.16700      | 0.18919       |
| 0.17200      | 0.19304       |
| 0.17700      | 0.19268       |
| 0.18200      | 0.18931       |
| 0.18700      | 0.18933       |
| 0.19200      | 0.19303       |
| 0.19700      | 0.19096       |
| 0.19800      | 0.18057       |
| 0.19300      | 0.18012       |
| 0.18800      | 0.17590       |
| 0.18300      | 0.17641       |
| 0.17800      | 0.17186       |
| 0.17300      | 0.17102       |
| 0.16800      | 0.17416       |
| 0.16300      | 0.17365       |
| 0.15800      | 0.16963       |
| 0.15300      | 0.16898       |
| 0.14800      | 0.17223       |
| 0.14300      | 0.17137       |
| 0.13800      | 0.16756       |
| 0.13300      | 0.16728       |
| 0.12800      | 0.17042       |
| 0.12300      | 0.16998       |

| <b>E (V)</b> | <b>i (nA)</b> |
|--------------|---------------|
| 0.11800      | 0.16632       |
| 0.11300      | 0.16607       |
| 0.10800      | 0.16895       |
| 0.10300      | 0.16902       |
| 0.098000     | 0.16592       |
| 0.093000     | 0.16560       |
| 0.088000     | 0.16807       |
| 0.083000     | 0.16786       |
| 0.078000     | 0.16432       |
| 0.073000     | 0.16368       |
| 0.068000     | 0.16671       |
| 0.063000     | 0.16637       |
| 0.058000     | 0.16258       |
| 0.053000     | 0.16242       |
| 0.048000     | 0.16544       |
| 0.043000     | 0.16476       |
| 0.038000     | 0.16115       |
| 0.033000     | 0.16100       |
| 0.028000     | 0.16391       |
| 0.023000     | 0.16334       |
| 0.018000     | 0.15944       |
| 0.013000     | 0.15878       |
| 0.0080000    | 0.16136       |
| 0.0030000    | 0.16067       |
| -0.0020000   | 0.15611       |
| -0.0070000   | 0.15482       |
| -0.012000    | 0.15755       |
| -0.017000    | 0.15648       |
| -0.022000    | 0.15123       |
| -0.027000    | 0.14957       |
| -0.032000    | 0.15132       |
| -0.037000    | 0.14902       |
| -0.042000    | 0.14305       |
| -0.047000    | 0.14026       |
| -0.052000    | 0.14003       |

| <b>E (V)</b> | <b>i (nA)</b> |
|--------------|---------------|
| -0.057000    | 0.13589       |
| -0.062000    | 0.12816       |
| -0.067000    | 0.12287       |
| -0.072000    | 0.12007       |
| -0.077000    | 0.11326       |
| -0.082000    | 0.10241       |
| -0.087000    | 0.094220      |
| -0.092000    | 0.088740      |
| -0.097000    | 0.078790      |
| -0.10200     | 0.064040      |
| -0.10700     | 0.052880      |
| -0.11200     | 0.045130      |
| -0.11700     | 0.032680      |
| -0.12200     | 0.016670      |
| -0.12700     | 0.0042000     |
| -0.13200     | -0.0052000    |
| -0.13700     | -0.017850     |
| -0.14200     | -0.033510     |
| -0.14700     | -0.045370     |
| -0.15200     | -0.053180     |
| -0.15700     | -0.063870     |
| -0.16200     | -0.077460     |
| -0.16700     | -0.086840     |
| -0.17200     | -0.092140     |
| -0.17700     | -0.099940     |
| -0.18200     | -0.11039      |
| -0.18700     | -0.11703      |
| -0.19200     | -0.11955      |
| -0.19700     | -0.12515      |
| -0.20200     | -0.13302      |
| -0.20700     | -0.13647      |
| -0.21200     | -0.13708      |
| -0.21700     | -0.14043      |
| -0.22200     | -0.14594      |
| -0.22700     | -0.14784      |

| <b>E (V)</b> | <b>i (nA)</b> |
|--------------|---------------|
| -0.23200     | -0.14616      |
| -0.23700     | -0.14749      |
| -0.24200     | -0.15204      |
| -0.24700     | -0.15304      |
| -0.25200     | -0.14999      |
| -0.25700     | -0.15024      |
| -0.26200     | -0.15423      |
| -0.26700     | -0.15447      |
| -0.27200     | -0.15119      |
| -0.27700     | -0.15184      |
| -0.28200     | -0.15574      |
| -0.28700     | -0.15552      |
| -0.29200     | -0.15148      |
| -0.29700     | -0.15138      |
| -0.30200     | -0.15450      |
| -0.30700     | -0.15406      |
| -0.31200     | -0.15061      |
| -0.31700     | -0.14986      |
| -0.32200     | -0.15291      |
| -0.32700     | -0.15293      |
| -0.33200     | -0.14980      |
| -0.33700     | -0.14968      |
| -0.34200     | -0.15368      |
| -0.34700     | -0.15205      |

### 8.3.6 CV-6

| <b>E (V)</b> | <b>i (nA)</b> |
|--------------|---------------|
| -0.34800     | -0.14280      |
| -0.34300     | -0.13338      |
| -0.33800     | -0.13580      |
| -0.33300     | -0.13228      |
| -0.32800     | -0.12628      |
| -0.32300     | -0.12488      |
| -0.31800     | -0.12622      |
| -0.31300     | -0.12447      |

| <b>E (V)</b> | <b>i (nA)</b> |
|--------------|---------------|
| -0.30800     | -0.11964      |
| -0.30300     | -0.11855      |
| -0.29800     | -0.12033      |
| -0.29300     | -0.11904      |
| -0.28800     | -0.11425      |
| -0.28300     | -0.11261      |
| -0.27800     | -0.11501      |
| -0.27300     | -0.11432      |
| -0.26800     | -0.10936      |
| -0.26300     | -0.10776      |
| -0.25800     | -0.10979      |
| -0.25300     | -0.10751      |
| -0.24800     | -0.10184      |
| -0.24300     | -0.099690     |
| -0.23800     | -0.10091      |
| -0.23300     | -0.098110     |
| -0.22800     | -0.091380     |
| -0.22300     | -0.088010     |
| -0.21800     | -0.087350     |
| -0.21300     | -0.083110     |
| -0.20800     | -0.075220     |
| -0.20300     | -0.069860     |
| -0.19800     | -0.067510     |
| -0.19300     | -0.060950     |
| -0.18800     | -0.050040     |
| -0.18300     | -0.042290     |
| -0.17800     | -0.037460     |
| -0.17300     | -0.028230     |
| -0.16800     | -0.014680     |
| -0.16300     | -0.0043700    |
| -0.15800     | 0.0028400     |
| -0.15300     | 0.014440      |
| -0.14800     | 0.029940      |
| -0.14300     | 0.042010      |
| -0.13800     | 0.050820      |

| <b>E (V)</b> | <b>i (nA)</b> |
|--------------|---------------|
| -0.13300     | 0.063420      |
| -0.12800     | 0.079260      |
| -0.12300     | 0.091610      |
| -0.11800     | 0.10029       |
| -0.11300     | 0.11127       |
| -0.10800     | 0.12559       |
| -0.10300     | 0.13643       |
| -0.098000    | 0.14205       |
| -0.093000    | 0.15011       |
| -0.088000    | 0.16155       |
| -0.083000    | 0.16820       |
| -0.078000    | 0.17009       |
| -0.073000    | 0.17485       |
| -0.068000    | 0.18213       |
| -0.063000    | 0.18505       |
| -0.058000    | 0.18418       |
| -0.053000    | 0.18649       |
| -0.048000    | 0.19142       |
| -0.043000    | 0.19250       |
| -0.038000    | 0.19006       |
| -0.033000    | 0.19038       |
| -0.028000    | 0.19420       |
| -0.023000    | 0.19484       |
| -0.018000    | 0.19119       |
| -0.013000    | 0.19113       |
| -0.0080000   | 0.19504       |
| -0.0030000   | 0.19501       |
| 0.0020000    | 0.19124       |
| 0.0070000    | 0.19094       |
| 0.012000     | 0.19402       |
| 0.017000     | 0.19373       |
| 0.022000     | 0.19030       |
| 0.027000     | 0.19013       |
| 0.032000     | 0.19329       |
| 0.037000     | 0.19320       |

| <b>E (V)</b> | <b>i (nA)</b> |
|--------------|---------------|
| 0.042000     | 0.18947       |
| 0.047000     | 0.18900       |
| 0.052000     | 0.19221       |
| 0.057000     | 0.19219       |
| 0.062000     | 0.18831       |
| 0.067000     | 0.18769       |
| 0.072000     | 0.19087       |
| 0.077000     | 0.19075       |
| 0.082000     | 0.18691       |
| 0.087000     | 0.18724       |
| 0.092000     | 0.19112       |
| 0.097000     | 0.19051       |
| 0.10200      | 0.18700       |
| 0.10700      | 0.18717       |
| 0.11200      | 0.19025       |
| 0.11700      | 0.19001       |
| 0.12200      | 0.18650       |
| 0.12700      | 0.18617       |
| 0.13200      | 0.18939       |
| 0.13700      | 0.18939       |
| 0.14200      | 0.18596       |
| 0.14700      | 0.18567       |
| 0.15200      | 0.18922       |
| 0.15700      | 0.18955       |
| 0.16200      | 0.18559       |
| 0.16700      | 0.18604       |
| 0.17200      | 0.18934       |
| 0.17700      | 0.18923       |
| 0.18200      | 0.18582       |
| 0.18700      | 0.18613       |
| 0.19200      | 0.19010       |
| 0.19700      | 0.18661       |
| 0.19800      | 0.18187       |
| 0.19300      | 0.17727       |
| 0.18800      | 0.17257       |

| <b>E (V)</b> | <b>i (nA)</b> |
|--------------|---------------|
| 0.18300      | 0.17269       |
| 0.17800      | 0.16819       |
| 0.17300      | 0.16790       |
| 0.16800      | 0.17114       |
| 0.16300      | 0.17059       |
| 0.15800      | 0.16656       |
| 0.15300      | 0.16565       |
| 0.14800      | 0.16883       |
| 0.14300      | 0.16798       |
| 0.13800      | 0.16415       |
| 0.13300      | 0.16410       |
| 0.12800      | 0.16697       |
| 0.12300      | 0.16640       |
| 0.11800      | 0.16293       |
| 0.11300      | 0.16262       |
| 0.10800      | 0.16543       |
| 0.10300      | 0.16508       |
| 0.098000     | 0.16164       |
| 0.093000     | 0.16162       |
| 0.088000     | 0.16460       |
| 0.083000     | 0.16420       |
| 0.078000     | 0.16030       |
| 0.073000     | 0.16007       |
| 0.068000     | 0.16315       |
| 0.063000     | 0.16238       |
| 0.058000     | 0.15848       |
| 0.053000     | 0.15838       |
| 0.048000     | 0.16160       |
| 0.043000     | 0.16071       |
| 0.038000     | 0.15657       |
| 0.033000     | 0.15657       |
| 0.028000     | 0.15950       |
| 0.023000     | 0.15905       |
| 0.018000     | 0.15548       |
| 0.013000     | 0.15451       |



| <b>E (V)</b> | <b>i (nA)</b> |
|--------------|---------------|
| 0.0080000    | 0.15724       |
| 0.0030000    | 0.15677       |
| -0.0020000   | 0.15221       |
| -0.0070000   | 0.15098       |
| -0.012000    | 0.15315       |
| -0.017000    | 0.15192       |
| -0.022000    | 0.14687       |
| -0.027000    | 0.14498       |
| -0.032000    | 0.14639       |
| -0.037000    | 0.14364       |
| -0.042000    | 0.13757       |
| -0.047000    | 0.13469       |
| -0.052000    | 0.13377       |
| -0.057000    | 0.12923       |
| -0.062000    | 0.12114       |
| -0.067000    | 0.11517       |
| -0.072000    | 0.11177       |
| -0.077000    | 0.10415       |
| -0.082000    | 0.092100      |
| -0.087000    | 0.082950      |
| -0.092000    | 0.076460      |
| -0.097000    | 0.065420      |
| -0.10200     | 0.050100      |
| -0.10700     | 0.037780      |
| -0.11200     | 0.028570      |
| -0.11700     | 0.015240      |
| -0.12200     | -0.0017900    |
| -0.12700     | -0.015240     |
| -0.13200     | -0.025340     |
| -0.13700     | -0.038670     |
| -0.14200     | -0.055060     |
| -0.14700     | -0.067640     |
| -0.15200     | -0.076540     |
| -0.15700     | -0.087890     |
| -0.16200     | -0.10157      |

| <b>E (V)</b> | <b>i (nA)</b> |
|--------------|---------------|
| -0.16700     | -0.11160      |
| -0.17200     | -0.11726      |
| -0.17700     | -0.12541      |
| -0.18200     | -0.13616      |
| -0.18700     | -0.14242      |
| -0.19200     | -0.14490      |
| -0.19700     | -0.15041      |
| -0.20200     | -0.15831      |
| -0.20700     | -0.16183      |
| -0.21200     | -0.16170      |
| -0.21700     | -0.16472      |
| -0.22200     | -0.17015      |
| -0.22700     | -0.17172      |
| -0.23200     | -0.16992      |
| -0.23700     | -0.17111      |
| -0.24200     | -0.17559      |
| -0.24700     | -0.17630      |
| -0.25200     | -0.17284      |
| -0.25700     | -0.17275      |
| -0.26200     | -0.17679      |
| -0.26700     | -0.17716      |
| -0.27200     | -0.17336      |
| -0.27700     | -0.17339      |
| -0.28200     | -0.17678      |
| -0.28700     | -0.17656      |
| -0.29200     | -0.17301      |
| -0.29700     | -0.17308      |
| -0.30200     | -0.17634      |
| -0.30700     | -0.17589      |
| -0.31200     | -0.17231      |
| -0.31700     | -0.17213      |
| -0.32200     | -0.17514      |
| -0.32700     | -0.17448      |
| -0.33200     | -0.17122      |
| -0.33700     | -0.17084      |

| <b>E (V)</b> | <b>i (nA)</b> |
|--------------|---------------|
| -0.34200     | -0.17501      |
| -0.34700     | -0.17317      |

### 8.3.7 CV-7

| <b>E (V)</b> | <b>i (nA)</b> |
|--------------|---------------|
| -0.34800     | -0.16338      |
| -0.34300     | -0.15583      |
| -0.33800     | -0.15608      |
| -0.33300     | -0.15316      |
| -0.32800     | -0.14729      |
| -0.32300     | -0.14583      |
| -0.31800     | -0.14760      |
| -0.31300     | -0.14585      |
| -0.30800     | -0.14072      |
| -0.30300     | -0.13955      |
| -0.29800     | -0.14140      |
| -0.29300     | -0.14009      |
| -0.28800     | -0.13564      |
| -0.28300     | -0.13400      |
| -0.27800     | -0.13591      |
| -0.27300     | -0.13459      |
| -0.26800     | -0.12949      |
| -0.26300     | -0.12765      |
| -0.25800     | -0.12942      |
| -0.25300     | -0.12736      |
| -0.24800     | -0.12172      |
| -0.24300     | -0.11980      |
| -0.23800     | -0.12047      |
| -0.23300     | -0.11709      |
| -0.22800     | -0.11076      |
| -0.22300     | -0.10758      |
| -0.21800     | -0.10702      |
| -0.21300     | -0.10254      |
| -0.20800     | -0.094260     |
| -0.20300     | -0.088770     |

| <b>E (V)</b> | <b>i (nA)</b> |
|--------------|---------------|
| -0.19800     | -0.086260     |
| -0.19300     | -0.080060     |
| -0.18800     | -0.069110     |
| -0.18300     | -0.060730     |
| -0.17800     | -0.055760     |
| -0.17300     | -0.046320     |
| -0.16800     | -0.032640     |
| -0.16300     | -0.022130     |
| -0.15800     | -0.014110     |
| -0.15300     | -0.0019200    |
| -0.14800     | 0.013830      |
| -0.14300     | 0.026350      |
| -0.13800     | 0.036080      |
| -0.13300     | 0.049390      |
| -0.12800     | 0.065680      |
| -0.12300     | 0.078880      |
| -0.11800     | 0.088570      |
| -0.11300     | 0.10090       |
| -0.10800     | 0.11629       |
| -0.10300     | 0.12747       |
| -0.098000    | 0.13437       |
| -0.093000    | 0.14403       |
| -0.088000    | 0.15601       |
| -0.083000    | 0.16311       |
| -0.078000    | 0.16576       |
| -0.073000    | 0.17148       |
| -0.068000    | 0.17950       |
| -0.063000    | 0.18263       |
| -0.058000    | 0.18218       |
| -0.053000    | 0.18457       |
| -0.048000    | 0.18959       |
| -0.043000    | 0.19119       |
| -0.038000    | 0.18876       |
| -0.033000    | 0.18932       |
| -0.028000    | 0.19342       |

| <b>E (V)</b> | <b>i (nA)</b> |
|--------------|---------------|
| -0.023000    | 0.19413       |
| -0.018000    | 0.19094       |
| -0.013000    | 0.19085       |
| -0.0080000   | 0.19428       |
| -0.0030000   | 0.19409       |
| 0.0020000    | 0.19059       |
| 0.0070000    | 0.19045       |
| 0.012000     | 0.19334       |
| 0.017000     | 0.19265       |
| 0.022000     | 0.18906       |
| 0.027000     | 0.18899       |
| 0.032000     | 0.19183       |
| 0.037000     | 0.19158       |
| 0.042000     | 0.18804       |
| 0.047000     | 0.18776       |
| 0.052000     | 0.19111       |
| 0.057000     | 0.19086       |
| 0.062000     | 0.18680       |
| 0.067000     | 0.18663       |
| 0.072000     | 0.19021       |
| 0.077000     | 0.18972       |
| 0.082000     | 0.18562       |
| 0.087000     | 0.18553       |
| 0.092000     | 0.18900       |
| 0.097000     | 0.18860       |
| 0.10200      | 0.18515       |
| 0.10700      | 0.18521       |
| 0.11200      | 0.18784       |
| 0.11700      | 0.18759       |
| 0.12200      | 0.18475       |
| 0.12700      | 0.18455       |
| 0.13200      | 0.18768       |
| 0.13700      | 0.18779       |
| 0.14200      | 0.18437       |
| 0.14700      | 0.18432       |

| <b>E (V)</b> | <b>i (nA)</b> |
|--------------|---------------|
| 0.15200      | 0.18764       |
| 0.15700      | 0.18759       |
| 0.16200      | 0.18382       |
| 0.16700      | 0.18419       |
| 0.17200      | 0.18761       |
| 0.17700      | 0.18724       |
| 0.18200      | 0.18381       |
| 0.18700      | 0.18430       |
| 0.19200      | 0.18858       |
| 0.19700      | 0.18562       |
| 0.19800      | 0.17867       |
| 0.19300      | 0.17353       |
| 0.18800      | 0.17208       |
| 0.18300      | 0.17197       |
| 0.17800      | 0.16735       |
| 0.17300      | 0.16625       |
| 0.16800      | 0.16928       |
| 0.16300      | 0.16897       |
| 0.15800      | 0.16445       |
| 0.15300      | 0.16385       |
| 0.14800      | 0.16720       |
| 0.14300      | 0.16665       |
| 0.13800      | 0.16282       |
| 0.13300      | 0.16258       |
| 0.12800      | 0.16545       |
| 0.12300      | 0.16474       |
| 0.11800      | 0.16124       |
| 0.11300      | 0.16117       |
| 0.10800      | 0.16388       |
| 0.10300      | 0.16333       |
| 0.098000     | 0.15961       |
| 0.093000     | 0.15893       |
| 0.088000     | 0.16219       |
| 0.083000     | 0.16203       |
| 0.078000     | 0.15774       |

| <b>E (V)</b> | <b>i (nA)</b> |
|--------------|---------------|
| 0.073000     | 0.15750       |
| 0.068000     | 0.16092       |
| 0.063000     | 0.16055       |
| 0.058000     | 0.15659       |
| 0.053000     | 0.15617       |
| 0.048000     | 0.15941       |
| 0.043000     | 0.15891       |
| 0.038000     | 0.15490       |
| 0.033000     | 0.15441       |
| 0.028000     | 0.15717       |
| 0.023000     | 0.15688       |
| 0.018000     | 0.15316       |
| 0.013000     | 0.15219       |
| 0.0080000    | 0.15494       |
| 0.0030000    | 0.15435       |
| -0.0020000   | 0.14974       |
| -0.0070000   | 0.14863       |
| -0.012000    | 0.15100       |
| -0.017000    | 0.14945       |
| -0.022000    | 0.14434       |
| -0.027000    | 0.14252       |
| -0.032000    | 0.14329       |
| -0.037000    | 0.14016       |
| -0.042000    | 0.13383       |
| -0.047000    | 0.13049       |
| -0.052000    | 0.12936       |
| -0.057000    | 0.12414       |
| -0.062000    | 0.11515       |
| -0.067000    | 0.10877       |
| -0.072000    | 0.10479       |
| -0.077000    | 0.096410      |
| -0.082000    | 0.083620      |
| -0.087000    | 0.073320      |
| -0.092000    | 0.065750      |
| -0.097000    | 0.053670      |

| <b>E (V)</b> | <b>i (nA)</b> |
|--------------|---------------|
| -0.10200     | 0.037320      |
| -0.10700     | 0.024120      |
| -0.11200     | 0.013410      |
| -0.11700     | -0.0014200    |
| -0.12200     | -0.019160     |
| -0.12700     | -0.033410     |
| -0.13200     | -0.044760     |
| -0.13700     | -0.058910     |
| -0.14200     | -0.075540     |
| -0.14700     | -0.088680     |
| -0.15200     | -0.098100     |
| -0.15700     | -0.10997      |
| -0.16200     | -0.12404      |
| -0.16700     | -0.13386      |
| -0.17200     | -0.13974      |
| -0.17700     | -0.14818      |
| -0.18200     | -0.15920      |
| -0.18700     | -0.16562      |
| -0.19200     | -0.16772      |
| -0.19700     | -0.17290      |
| -0.20200     | -0.18062      |
| -0.20700     | -0.18408      |
| -0.21200     | -0.18351      |
| -0.21700     | -0.18579      |
| -0.22200     | -0.19112      |
| -0.22700     | -0.19281      |
| -0.23200     | -0.19067      |
| -0.23700     | -0.19159      |
| -0.24200     | -0.19586      |
| -0.24700     | -0.19648      |
| -0.25200     | -0.19336      |
| -0.25700     | -0.19328      |
| -0.26200     | -0.19678      |
| -0.26700     | -0.19687      |
| -0.27200     | -0.19322      |



| <b>E (V)</b> | <b>i (nA)</b> |
|--------------|---------------|
| -0.27700     | -0.19308      |
| -0.28200     | -0.19627      |
| -0.28700     | -0.19560      |
| -0.29200     | -0.19208      |
| -0.29700     | -0.19232      |
| -0.30200     | -0.19481      |
| -0.30700     | -0.19446      |
| -0.31200     | -0.19115      |
| -0.31700     | -0.19087      |
| -0.32200     | -0.19402      |
| -0.32700     | -0.19384      |
| -0.33200     | -0.19014      |
| -0.33700     | -0.18967      |
| -0.34200     | -0.19359      |
| -0.34700     | -0.19108      |

### 8.3.8 CV-8

| <b>E (V)</b> | <b>i (nA)</b> |
|--------------|---------------|
| -0.34800     | -0.18462      |
| -0.34300     | -0.17544      |
| -0.33800     | -0.17330      |
| -0.33300     | -0.17106      |
| -0.32800     | -0.16526      |
| -0.32300     | -0.16369      |
| -0.31800     | -0.16519      |
| -0.31300     | -0.16347      |
| -0.30800     | -0.15922      |
| -0.30300     | -0.15762      |
| -0.29800     | -0.15915      |
| -0.29300     | -0.15799      |
| -0.28800     | -0.15329      |
| -0.28300     | -0.15175      |
| -0.27800     | -0.15383      |
| -0.27300     | -0.15207      |
| -0.26800     | -0.14685      |

| <b>E (V)</b> | <b>i (nA)</b> |
|--------------|---------------|
| -0.26300     | -0.14527      |
| -0.25800     | -0.14704      |
| -0.25300     | -0.14480      |
| -0.24800     | -0.13910      |
| -0.24300     | -0.13736      |
| -0.23800     | -0.13835      |
| -0.23300     | -0.13518      |
| -0.22800     | -0.12875      |
| -0.22300     | -0.12550      |
| -0.21800     | -0.12499      |
| -0.21300     | -0.12077      |
| -0.20800     | -0.11257      |
| -0.20300     | -0.10687      |
| -0.19800     | -0.10415      |
| -0.19300     | -0.097570     |
| -0.18800     | -0.086450     |
| -0.18300     | -0.078080     |
| -0.17800     | -0.072860     |
| -0.17300     | -0.063160     |
| -0.16800     | -0.049290     |
| -0.16300     | -0.038340     |
| -0.15800     | -0.029830     |
| -0.15300     | -0.016990     |
| -0.14800     | -6.5498E-4    |
| -0.14300     | 0.012420      |
| -0.13800     | 0.023250      |
| -0.13300     | 0.037620      |
| -0.12800     | 0.054830      |
| -0.12300     | 0.068920      |
| -0.11800     | 0.079340      |
| -0.11300     | 0.092730      |
| -0.10800     | 0.10925       |
| -0.10300     | 0.12114       |
| -0.098000    | 0.12897       |
| -0.093000    | 0.13970       |

| <b>E (V)</b> | <b>i (nA)</b> |
|--------------|---------------|
| -0.088000    | 0.15229       |
| -0.083000    | 0.15995       |
| -0.078000    | 0.16341       |
| -0.073000    | 0.16988       |
| -0.068000    | 0.17849       |
| -0.063000    | 0.18240       |
| -0.058000    | 0.18239       |
| -0.053000    | 0.18490       |
| -0.048000    | 0.19008       |
| -0.043000    | 0.19178       |
| -0.038000    | 0.18977       |
| -0.033000    | 0.19047       |
| -0.028000    | 0.19419       |
| -0.023000    | 0.19459       |
| -0.018000    | 0.19140       |
| -0.013000    | 0.19121       |
| -0.0080000   | 0.19445       |
| -0.0030000   | 0.19393       |
| 0.0020000    | 0.19033       |
| 0.0070000    | 0.19084       |
| 0.012000     | 0.19398       |
| 0.017000     | 0.19314       |
| 0.022000     | 0.18946       |
| 0.027000     | 0.18943       |
| 0.032000     | 0.19246       |
| 0.037000     | 0.19201       |
| 0.042000     | 0.18814       |
| 0.047000     | 0.18754       |
| 0.052000     | 0.19080       |
| 0.057000     | 0.19096       |
| 0.062000     | 0.18713       |
| 0.067000     | 0.18678       |
| 0.072000     | 0.19034       |
| 0.077000     | 0.18990       |
| 0.082000     | 0.18595       |

| <b>E (V)</b> | <b>i (nA)</b> |
|--------------|---------------|
| 0.087000     | 0.18583       |
| 0.092000     | 0.18883       |
| 0.097000     | 0.18842       |
| 0.10200      | 0.18492       |
| 0.10700      | 0.18471       |
| 0.11200      | 0.18788       |
| 0.11700      | 0.18767       |
| 0.12200      | 0.18401       |
| 0.12700      | 0.18385       |
| 0.13200      | 0.18709       |
| 0.13700      | 0.18705       |
| 0.14200      | 0.18358       |
| 0.14700      | 0.18360       |
| 0.15200      | 0.18716       |
| 0.15700      | 0.18704       |
| 0.16200      | 0.18310       |
| 0.16700      | 0.18325       |
| 0.17200      | 0.18686       |
| 0.17700      | 0.18625       |
| 0.18200      | 0.18275       |
| 0.18700      | 0.18281       |
| 0.19200      | 0.18672       |
| 0.19700      | 0.18440       |
| 0.19800      | 0.17542       |
| 0.19300      | 0.16938       |
| 0.18800      | 0.16927       |
| 0.18300      | 0.16817       |
| 0.17800      | 0.16351       |
| 0.17300      | 0.16265       |
| 0.16800      | 0.16523       |
| 0.16300      | 0.16477       |
| 0.15800      | 0.15981       |
| 0.15300      | 0.15871       |
| 0.14800      | 0.16131       |
| 0.14300      | 0.16027       |

| <b>E (V)</b> | <b>i (nA)</b> |
|--------------|---------------|
| 0.13800      | 0.15651       |
| 0.13300      | 0.15656       |
| 0.12800      | 0.15983       |
| 0.12300      | 0.15961       |
| 0.11800      | 0.15629       |
| 0.11300      | 0.15649       |
| 0.10800      | 0.15986       |
| 0.10300      | 0.15993       |
| 0.098000     | 0.15630       |
| 0.093000     | 0.15541       |
| 0.088000     | 0.15851       |
| 0.083000     | 0.15816       |
| 0.078000     | 0.15351       |
| 0.073000     | 0.15221       |
| 0.068000     | 0.15451       |
| 0.063000     | 0.15341       |
| 0.058000     | 0.14903       |
| 0.053000     | 0.14846       |
| 0.048000     | 0.15108       |
| 0.043000     | 0.14973       |
| 0.038000     | 0.14510       |
| 0.033000     | 0.14346       |
| 0.028000     | 0.14416       |
| 0.023000     | 0.14230       |
| 0.018000     | 0.13912       |
| 0.013000     | 0.14069       |
| 0.0080000    | 0.14266       |
| 0.0030000    | 0.13552       |
| -0.0020000   | 0.12513       |
| -0.0070000   | 0.12161       |
| -0.012000    | 0.12199       |
| -0.017000    | 0.11691       |
| -0.022000    | 0.10715       |
| -0.027000    | 0.10229       |
| -0.032000    | 0.10219       |

| <b>E (V)</b> | <b>i (nA)</b> |
|--------------|---------------|
| -0.037000    | 0.098880      |
| -0.042000    | 0.093240      |
| -0.047000    | 0.091850      |
| -0.052000    | 0.092630      |
| -0.057000    | 0.088490      |
| -0.062000    | 0.079350      |
| -0.067000    | 0.071440      |
| -0.072000    | 0.065540      |
| -0.077000    | 0.055000      |
| -0.082000    | 0.038950      |
| -0.087000    | 0.024830      |
| -0.092000    | 0.014980      |
| -0.097000    | 0.0036300     |
| -0.10200     | -0.011990     |
| -0.10700     | -0.028050     |
| -0.11200     | -0.042460     |
| -0.11700     | -0.058910     |
| -0.12200     | -0.076790     |
| -0.12700     | -0.089800     |
| -0.13200     | -0.095070     |
| -0.13700     | -0.098270     |
| -0.14200     | -0.10275      |
| -0.14700     | -0.11069      |
| -0.15200     | -0.14309      |
| -0.15700     | -0.19179      |
| -0.16200     | -0.21545      |
| -0.16700     | -0.21642      |
| -0.17200     | -0.21316      |
| -0.17700     | -0.20764      |
| -0.18200     | -0.20717      |
| -0.18700     | -0.21007      |
| -0.19200     | -0.21093      |
| -0.19700     | -0.21270      |
| -0.20200     | -0.21564      |
| -0.20700     | -0.21464      |

| <b>E (V)</b> | <b>i (nA)</b> |
|--------------|---------------|
| -0.21200     | -0.20950      |
| -0.21700     | -0.20935      |
| -0.22200     | -0.21430      |
| -0.22700     | -0.21507      |
| -0.23200     | -0.21102      |
| -0.23700     | -0.20746      |
| -0.24200     | -0.20528      |
| -0.24700     | -0.20089      |
| -0.25200     | -0.19494      |
| -0.25700     | -0.19381      |
| -0.26200     | -0.19683      |
| -0.26700     | -0.19448      |
| -0.27200     | -0.18577      |
| -0.27700     | -0.18023      |
| -0.28200     | -0.17834      |
| -0.28700     | -0.17117      |
| -0.29200     | -0.16139      |
| -0.29700     | -0.15284      |
| -0.30200     | -0.14406      |
| -0.30700     | -0.14547      |
| -0.31200     | -0.15622      |
| -0.31700     | -0.16196      |
| -0.32200     | -0.15771      |
| -0.32700     | -0.14385      |
| -0.33200     | -0.13022      |
| -0.33700     | -0.12979      |
| -0.34200     | -0.13413      |
| -0.34700     | -0.13113      |

### 8.3.9 CV-9

| <b>E (V)</b> | <b>i (nA)</b> |
|--------------|---------------|
| -0.34800     | -0.13146      |
| -0.34300     | -0.14029      |
| -0.33800     | -0.13499      |
| -0.33300     | -0.14006      |

| <b>E (V)</b> | <b>i (nA)</b> |
|--------------|---------------|
| -0.32800     | -0.14238      |
| -0.32300     | -0.14646      |
| -0.31800     | -0.14915      |
| -0.31300     | -0.14675      |
| -0.30800     | -0.14028      |
| -0.30300     | -0.13403      |
| -0.29800     | -0.13172      |
| -0.29300     | -0.12851      |
| -0.28800     | -0.12391      |
| -0.28300     | -0.12076      |
| -0.27800     | -0.12054      |
| -0.27300     | -0.12167      |
| -0.26800     | -0.12332      |
| -0.26300     | -0.13175      |
| -0.25800     | -0.14411      |
| -0.25300     | -0.13355      |
| -0.24800     | -0.089000     |
| -0.24300     | -0.060180     |
| -0.23800     | -0.075850     |
| -0.23300     | -0.091790     |
| -0.22800     | -0.094850     |
| -0.22300     | -0.10469      |
| -0.21800     | -0.11385      |
| -0.21300     | -0.11716      |
| -0.20800     | -0.11799      |
| -0.20300     | -0.12086      |
| -0.19800     | -0.12357      |
| -0.19300     | -0.11507      |
| -0.18800     | -0.098420     |
| -0.18300     | -0.085480     |
| -0.17800     | -0.076930     |
| -0.17300     | -0.066040     |
| -0.16800     | -0.053200     |
| -0.16300     | -0.044180     |
| -0.15800     | -0.036530     |



| <b>E (V)</b> | <b>i (nA)</b> |
|--------------|---------------|
| -0.15300     | -0.022840     |
| -0.14800     | -0.0059000    |
| -0.14300     | 0.0074400     |
| -0.13800     | 0.016730      |
| -0.13300     | 0.028670      |
| -0.12800     | 0.047420      |
| -0.12300     | 0.063920      |
| -0.11800     | 0.075340      |
| -0.11300     | 0.091890      |
| -0.10800     | 0.11176       |
| -0.10300     | 0.12295       |
| -0.098000    | 0.12802       |
| -0.093000    | 0.13720       |
| -0.088000    | 0.14886       |
| -0.083000    | 0.15671       |
| -0.078000    | 0.16063       |
| -0.073000    | 0.16567       |
| -0.068000    | 0.17292       |
| -0.063000    | 0.17681       |
| -0.058000    | 0.17731       |
| -0.053000    | 0.18064       |
| -0.048000    | 0.18642       |
| -0.043000    | 0.18838       |
| -0.038000    | 0.18649       |
| -0.033000    | 0.18753       |
| -0.028000    | 0.19198       |
| -0.023000    | 0.19296       |
| -0.018000    | 0.19023       |
| -0.013000    | 0.19054       |
| -0.0080000   | 0.19367       |
| -0.0030000   | 0.19287       |
| 0.0020000    | 0.18893       |
| 0.0070000    | 0.18870       |
| 0.012000     | 0.19191       |
| 0.017000     | 0.19272       |

| <b>E (V)</b> | <b>i (nA)</b> |
|--------------|---------------|
| 0.022000     | 0.19067       |
| 0.027000     | 0.18975       |
| 0.032000     | 0.19052       |
| 0.037000     | 0.18891       |
| 0.042000     | 0.18492       |
| 0.047000     | 0.18500       |
| 0.052000     | 0.18845       |
| 0.057000     | 0.18841       |
| 0.062000     | 0.18493       |
| 0.067000     | 0.18433       |
| 0.072000     | 0.18734       |
| 0.077000     | 0.18720       |
| 0.082000     | 0.18382       |
| 0.087000     | 0.18406       |
| 0.092000     | 0.18726       |
| 0.097000     | 0.18673       |
| 0.10200      | 0.18386       |
| 0.10700      | 0.18420       |
| 0.11200      | 0.18703       |
| 0.11700      | 0.18686       |
| 0.12200      | 0.18344       |
| 0.12700      | 0.18333       |
| 0.13200      | 0.18659       |
| 0.13700      | 0.18671       |
| 0.14200      | 0.18330       |
| 0.14700      | 0.18416       |
| 0.15200      | 0.18781       |
| 0.15700      | 0.18594       |
| 0.16200      | 0.18126       |
| 0.16700      | 0.18155       |
| 0.17200      | 0.18565       |
| 0.17700      | 0.18551       |
| 0.18200      | 0.18214       |
| 0.18700      | 0.18194       |
| 0.19200      | 0.18618       |

| <b>E (V)</b> | <b>i (nA)</b> |
|--------------|---------------|
| 0.19700      | 0.18351       |
| 0.19800      | 0.17591       |
| 0.19300      | 0.16939       |
| 0.18800      | 0.17010       |
| 0.18300      | 0.16974       |
| 0.17800      | 0.16515       |
| 0.17300      | 0.16448       |
| 0.16800      | 0.16733       |
| 0.16300      | 0.16702       |
| 0.15800      | 0.16280       |
| 0.15300      | 0.16262       |
| 0.14800      | 0.16566       |
| 0.14300      | 0.16480       |
| 0.13800      | 0.16092       |
| 0.13300      | 0.16094       |
| 0.12800      | 0.16415       |
| 0.12300      | 0.16372       |
| 0.11800      | 0.16060       |
| 0.11300      | 0.16027       |
| 0.10800      | 0.16217       |
| 0.10300      | 0.16146       |
| 0.098000     | 0.15790       |
| 0.093000     | 0.15737       |
| 0.088000     | 0.16092       |
| 0.083000     | 0.16107       |
| 0.078000     | 0.15706       |
| 0.073000     | 0.15651       |
| 0.068000     | 0.15967       |
| 0.063000     | 0.15938       |
| 0.058000     | 0.15559       |
| 0.053000     | 0.15522       |
| 0.048000     | 0.15812       |
| 0.043000     | 0.15764       |
| 0.038000     | 0.15411       |
| 0.033000     | 0.15397       |

| <b>E (V)</b> | <b>i (nA)</b> |
|--------------|---------------|
| 0.028000     | 0.15651       |
| 0.023000     | 0.15586       |
| 0.018000     | 0.15218       |
| 0.013000     | 0.15130       |
| 0.0080000    | 0.15366       |
| 0.0030000    | 0.15231       |
| -0.0020000   | 0.14728       |
| -0.0070000   | 0.14621       |
| -0.012000    | 0.14845       |
| -0.017000    | 0.14638       |
| -0.022000    | 0.14041       |
| -0.027000    | 0.13785       |
| -0.032000    | 0.13859       |
| -0.037000    | 0.13543       |
| -0.042000    | 0.12844       |
| -0.047000    | 0.12387       |
| -0.052000    | 0.12188       |
| -0.057000    | 0.11620       |
| -0.062000    | 0.10598       |
| -0.067000    | 0.097910      |
| -0.072000    | 0.092220      |
| -0.077000    | 0.082430      |
| -0.082000    | 0.068070      |
| -0.087000    | 0.055650      |
| -0.092000    | 0.046100      |
| -0.097000    | 0.032250      |
| -0.10200     | 0.013890      |
| -0.10700     | -0.0013800    |
| -0.11200     | -0.013600     |
| -0.11700     | -0.029870     |
| -0.12200     | -0.049490     |
| -0.12700     | -0.065570     |
| -0.13200     | -0.078280     |
| -0.13700     | -0.094020     |
| -0.14200     | -0.11252      |

| <b>E (V)</b> | <b>i (nA)</b> |
|--------------|---------------|
| -0.14700     | -0.12683      |
| -0.15200     | -0.13698      |
| -0.15700     | -0.14946      |
| -0.16200     | -0.16457      |
| -0.16700     | -0.17527      |
| -0.17200     | -0.18110      |
| -0.17700     | -0.18949      |
| -0.18200     | -0.20051      |
| -0.18700     | -0.20699      |
| -0.19200     | -0.20911      |
| -0.19700     | -0.21388      |
| -0.20200     | -0.22087      |
| -0.20700     | -0.22393      |
| -0.21200     | -0.22389      |
| -0.21700     | -0.22650      |
| -0.22200     | -0.23133      |
| -0.22700     | -0.23272      |
| -0.23200     | -0.23049      |
| -0.23700     | -0.23097      |
| -0.24200     | -0.23452      |
| -0.24700     | -0.23460      |
| -0.25200     | -0.23119      |
| -0.25700     | -0.23098      |
| -0.26200     | -0.23422      |
| -0.26700     | -0.23354      |
| -0.27200     | -0.22950      |
| -0.27700     | -0.22969      |
| -0.28200     | -0.23299      |
| -0.28700     | -0.23208      |
| -0.29200     | -0.22836      |
| -0.29700     | -0.22815      |
| -0.30200     | -0.23075      |
| -0.30700     | -0.23051      |
| -0.31200     | -0.22658      |
| -0.31700     | -0.22606      |

| <b>E (V)</b> | <b>i (nA)</b> |
|--------------|---------------|
| -0.32200     | -0.22855      |
| -0.32700     | -0.22857      |
| -0.33200     | -0.22474      |
| -0.33700     | -0.22378      |
| -0.34200     | -0.22776      |
| -0.34700     | -0.22439      |

### 8.3.10 CV-10

| <b>E(V)</b> | <b>i(nA)</b> |
|-------------|--------------|
| -0.34800    | -0.22033     |
| -0.34300    | -0.21156     |
| -0.33800    | -0.20658     |
| -0.33300    | -0.20496     |
| -0.32800    | -0.19930     |
| -0.32300    | -0.19782     |
| -0.31800    | -0.19934     |
| -0.31300    | -0.19734     |
| -0.30800    | -0.19293     |
| -0.30300    | -0.19101     |
| -0.29800    | -0.19329     |
| -0.29300    | -0.19232     |
| -0.28800    | -0.18718     |
| -0.28300    | -0.18534     |
| -0.27800    | -0.18755     |
| -0.27300    | -0.18599     |
| -0.26800    | -0.18060     |
| -0.26300    | -0.17906     |
| -0.25800    | -0.18108     |
| -0.25300    | -0.17905     |
| -0.24800    | -0.17320     |
| -0.24300    | -0.17097     |
| -0.23800    | -0.17156     |
| -0.23300    | -0.16853     |
| -0.22800    | -0.16219     |
| -0.22300    | -0.15837     |

| <b>E(V)</b> | <b>i(nA)</b> |
|-------------|--------------|
| -0.21800    | -0.15734     |
| -0.21300    | -0.15320     |
| -0.20800    | -0.14494     |
| -0.20300    | -0.13914     |
| -0.19800    | -0.13625     |
| -0.19300    | -0.12884     |
| -0.18800    | -0.11753     |
| -0.18300    | -0.10930     |
| -0.17800    | -0.10324     |
| -0.17300    | -0.092310    |
| -0.16800    | -0.077440    |
| -0.16300    | -0.065870    |
| -0.15800    | -0.056480    |
| -0.15300    | -0.042210    |
| -0.14800    | -0.024470    |
| -0.14300    | -0.0099200   |
| -0.13800    | 0.0021900    |
| -0.13300    | 0.017860     |
| -0.12800    | 0.037020     |
| -0.12300    | 0.052990     |
| -0.11800    | 0.065320     |
| -0.11300    | 0.080580     |
| -0.10800    | 0.098760     |
| -0.10300    | 0.11291      |
| -0.098000   | 0.12280      |
| -0.093000   | 0.13484      |
| -0.088000   | 0.14888      |
| -0.083000   | 0.15836      |
| -0.078000   | 0.16362      |
| -0.073000   | 0.17115      |
| -0.068000   | 0.18017      |
| -0.063000   | 0.18493      |
| -0.058000   | 0.18627      |
| -0.053000   | 0.18954      |
| -0.048000   | 0.19480      |

| <b>E(V)</b> | <b>i(nA)</b> |
|-------------|--------------|
| -0.043000   | 0.19693      |
| -0.038000   | 0.19543      |
| -0.033000   | 0.19633      |
| -0.028000   | 0.20059      |
| -0.023000   | 0.20093      |
| -0.018000   | 0.19728      |
| -0.013000   | 0.19766      |
| -0.0080000  | 0.20124      |
| -0.0030000  | 0.20086      |
| 0.0020000   | 0.19734      |
| 0.0070000   | 0.19700      |
| 0.012000    | 0.19992      |
| 0.017000    | 0.19970      |
| 0.022000    | 0.19609      |
| 0.027000    | 0.19573      |
| 0.032000    | 0.19847      |
| 0.037000    | 0.19828      |
| 0.042000    | 0.19488      |
| 0.047000    | 0.19434      |
| 0.052000    | 0.19728      |
| 0.057000    | 0.19706      |
| 0.062000    | 0.19334      |
| 0.067000    | 0.19314      |
| 0.072000    | 0.19635      |
| 0.077000    | 0.19556      |
| 0.082000    | 0.19189      |
| 0.087000    | 0.19221      |
| 0.092000    | 0.19529      |
| 0.097000    | 0.19460      |
| 0.10200     | 0.19122      |
| 0.10700     | 0.19148      |
| 0.11200     | 0.19439      |
| 0.11700     | 0.19388      |
| 0.12200     | 0.19012      |
| 0.12700     | 0.19003      |



| <b>E(V)</b> | <b>i(nA)</b> |
|-------------|--------------|
| 0.13200     | 0.19341      |
| 0.13700     | 0.19337      |
| 0.14200     | 0.18962      |
| 0.14700     | 0.18939      |
| 0.15200     | 0.19304      |
| 0.15700     | 0.19283      |
| 0.16200     | 0.18920      |
| 0.16700     | 0.18933      |
| 0.17200     | 0.19267      |
| 0.17700     | 0.19221      |
| 0.18200     | 0.18950      |
| 0.18700     | 0.18944      |
| 0.19200     | 0.19275      |
| 0.19700     | 0.19085      |
| 0.19800     | 0.17934      |
| 0.19300     | 0.17866      |
| 0.18800     | 0.17576      |
| 0.18300     | 0.17587      |
| 0.17800     | 0.17123      |
| 0.17300     | 0.17076      |
| 0.16800     | 0.17385      |
| 0.16300     | 0.17303      |
| 0.15800     | 0.16910      |
| 0.15300     | 0.16900      |
| 0.14800     | 0.17202      |
| 0.14300     | 0.17123      |
| 0.13800     | 0.16730      |
| 0.13300     | 0.16689      |
| 0.12800     | 0.16987      |
| 0.12300     | 0.16912      |
| 0.11800     | 0.16552      |
| 0.11300     | 0.16520      |
| 0.10800     | 0.16798      |
| 0.10300     | 0.16792      |
| 0.098000    | 0.16431      |

| <b>E(V)</b> | <b>i(nA)</b> |
|-------------|--------------|
| 0.093000    | 0.16369      |
| 0.088000    | 0.16666      |
| 0.083000    | 0.16649      |
| 0.078000    | 0.16272      |
| 0.073000    | 0.16238      |
| 0.068000    | 0.16527      |
| 0.063000    | 0.16444      |
| 0.058000    | 0.16055      |
| 0.053000    | 0.16038      |
| 0.048000    | 0.16296      |
| 0.043000    | 0.16204      |
| 0.038000    | 0.15848      |
| 0.033000    | 0.15814      |
| 0.028000    | 0.16084      |
| 0.023000    | 0.16016      |
| 0.018000    | 0.15598      |
| 0.013000    | 0.15518      |
| 0.0080000   | 0.15806      |
| 0.0030000   | 0.15693      |
| -0.0020000  | 0.15175      |
| -0.0070000  | 0.15036      |
| -0.012000   | 0.15202      |
| -0.017000   | 0.14982      |
| -0.022000   | 0.14407      |
| -0.027000   | 0.14128      |
| -0.032000   | 0.14152      |
| -0.037000   | 0.13794      |
| -0.042000   | 0.13066      |
| -0.047000   | 0.12589      |
| -0.052000   | 0.12332      |
| -0.057000   | 0.11696      |
| -0.062000   | 0.10637      |
| -0.067000   | 0.097740     |
| -0.072000   | 0.091240     |
| -0.077000   | 0.080230     |

| <b>E(V)</b> | <b>i(nA)</b> |
|-------------|--------------|
| -0.082000   | 0.064960     |
| -0.087000   | 0.051880     |
| -0.092000   | 0.040860     |
| -0.097000   | 0.025600     |
| -0.10200    | 0.0061500    |
| -0.10700    | -0.010090    |
| -0.11200    | -0.023380    |
| -0.11700    | -0.041160    |
| -0.12200    | -0.061690    |
| -0.12700    | -0.078320    |
| -0.13200    | -0.092060    |
| -0.13700    | -0.10827     |
| -0.14200    | -0.12722     |
| -0.14700    | -0.14243     |
| -0.15200    | -0.15309     |
| -0.15700    | -0.16599     |
| -0.16200    | -0.18132     |
| -0.16700    | -0.19245     |
| -0.17200    | -0.19887     |
| -0.17700    | -0.20726     |
| -0.18200    | -0.21809     |
| -0.18700    | -0.22458     |
| -0.19200    | -0.22691     |
| -0.19700    | -0.23155     |
| -0.20200    | -0.23831     |
| -0.20700    | -0.24114     |
| -0.21200    | -0.24059     |
| -0.21700    | -0.24289     |
| -0.22200    | -0.24734     |
| -0.22700    | -0.24820     |
| -0.23200    | -0.24597     |
| -0.23700    | -0.24658     |
| -0.24200    | -0.25032     |
| -0.24700    | -0.25032     |
| -0.25200    | -0.24652     |

| <b>E(V)</b> | <b>i(nA)</b> |
|-------------|--------------|
| -0.25700    | -0.24635     |
| -0.26200    | -0.24944     |
| -0.26700    | -0.24876     |
| -0.27200    | -0.24458     |
| -0.27700    | -0.24396     |
| -0.28200    | -0.24694     |
| -0.28700    | -0.24621     |
| -0.29200    | -0.24241     |
| -0.29700    | -0.24216     |
| -0.30200    | -0.24473     |
| -0.30700    | -0.24460     |
| -0.31200    | -0.24103     |
| -0.31700    | -0.24050     |
| -0.32200    | -0.24328     |
| -0.32700    | -0.24278     |
| -0.33200    | -0.23934     |
| -0.33700    | -0.23875     |
| -0.34200    | -0.24230     |
| -0.34700    | -0.23922     |

### 8.3.11 CV-11

| <b>E (V)</b> | <b>i (nA)</b> |
|--------------|---------------|
| -0.34800     | -0.23168      |
| -0.34300     | -0.22349      |
| -0.33800     | -0.22128      |
| -0.33300     | -0.21899      |
| -0.32800     | -0.21350      |
| -0.32300     | -0.21220      |
| -0.31800     | -0.21388      |
| -0.31300     | -0.21194      |
| -0.30800     | -0.20728      |
| -0.30300     | -0.20569      |
| -0.29800     | -0.20741      |
| -0.29300     | -0.20621      |
| -0.28800     | -0.20127      |

| <b>E (V)</b> | <b>i (nA)</b> |
|--------------|---------------|
| -0.28300     | -0.19934      |
| -0.27800     | -0.20141      |
| -0.27300     | -0.19991      |
| -0.26800     | -0.19462      |
| -0.26300     | -0.19293      |
| -0.25800     | -0.19449      |
| -0.25300     | -0.19240      |
| -0.24800     | -0.18696      |
| -0.24300     | -0.18460      |
| -0.23800     | -0.18505      |
| -0.23300     | -0.18201      |
| -0.22800     | -0.17573      |
| -0.22300     | -0.17223      |
| -0.21800     | -0.17113      |
| -0.21300     | -0.16658      |
| -0.20800     | -0.15816      |
| -0.20300     | -0.15216      |
| -0.19800     | -0.14894      |
| -0.19300     | -0.14161      |
| -0.18800     | -0.13016      |
| -0.18300     | -0.12159      |
| -0.17800     | -0.11553      |
| -0.17300     | -0.10453      |
| -0.16800     | -0.089320     |
| -0.16300     | -0.077080     |
| -0.15800     | -0.067170     |
| -0.15300     | -0.053120     |
| -0.14800     | -0.034920     |
| -0.14300     | -0.019090     |
| -0.13800     | -0.0060600    |
| -0.13300     | 0.010280      |
| -0.12800     | 0.030010      |
| -0.12300     | 0.047010      |
| -0.11800     | 0.060440      |
| -0.11300     | 0.076520      |

| <b>E (V)</b> | <b>i (nA)</b> |
|--------------|---------------|
| -0.10800     | 0.095690      |
| -0.10300     | 0.11067       |
| -0.098000    | 0.12138       |
| -0.093000    | 0.13461       |
| -0.088000    | 0.14958       |
| -0.083000    | 0.15968       |
| -0.078000    | 0.16598       |
| -0.073000    | 0.17445       |
| -0.068000    | 0.18415       |
| -0.063000    | 0.18959       |
| -0.058000    | 0.19094       |
| -0.053000    | 0.19457       |
| -0.048000    | 0.20084       |
| -0.043000    | 0.20300       |
| -0.038000    | 0.20129       |
| -0.033000    | 0.20246       |
| -0.028000    | 0.20671       |
| -0.023000    | 0.20737       |
| -0.018000    | 0.20404       |
| -0.013000    | 0.20417       |
| -0.0080000   | 0.20792       |
| -0.0030000   | 0.20780       |
| 0.0020000    | 0.20431       |
| 0.0070000    | 0.20408       |
| 0.012000     | 0.20647       |
| 0.017000     | 0.20597       |
| 0.022000     | 0.20261       |
| 0.027000     | 0.20188       |
| 0.032000     | 0.20457       |
| 0.037000     | 0.20434       |
| 0.042000     | 0.20070       |
| 0.047000     | 0.20042       |
| 0.052000     | 0.20332       |
| 0.057000     | 0.20289       |
| 0.062000     | 0.19927       |

| <b>E (V)</b> | <b>i (nA)</b> |
|--------------|---------------|
| 0.067000     | 0.19920       |
| 0.072000     | 0.20226       |
| 0.077000     | 0.20144       |
| 0.082000     | 0.19761       |
| 0.087000     | 0.19759       |
| 0.092000     | 0.20038       |
| 0.097000     | 0.19969       |
| 0.10200      | 0.19663       |
| 0.10700      | 0.19682       |
| 0.11200      | 0.19946       |
| 0.11700      | 0.19907       |
| 0.12200      | 0.19567       |
| 0.12700      | 0.19540       |
| 0.13200      | 0.19857       |
| 0.13700      | 0.19869       |
| 0.14200      | 0.19541       |
| 0.14700      | 0.19501       |
| 0.15200      | 0.19793       |
| 0.15700      | 0.19791       |
| 0.16200      | 0.19447       |
| 0.16700      | 0.19460       |
| 0.17200      | 0.19751       |
| 0.17700      | 0.19706       |
| 0.18200      | 0.19433       |
| 0.18700      | 0.19440       |
| 0.19200      | 0.19791       |
| 0.19700      | 0.19574       |
| 0.19800      | 0.18711       |
| 0.19300      | 0.18322       |
| 0.18800      | 0.18161       |
| 0.18300      | 0.18165       |
| 0.17800      | 0.17688       |
| 0.17300      | 0.17619       |
| 0.16800      | 0.17887       |
| 0.16300      | 0.17807       |

| <b>E (V)</b> | <b>i (nA)</b> |
|--------------|---------------|
| 0.15800      | 0.17390       |
| 0.15300      | 0.17353       |
| 0.14800      | 0.17644       |
| 0.14300      | 0.17574       |
| 0.13800      | 0.17223       |
| 0.13300      | 0.17187       |
| 0.12800      | 0.17455       |
| 0.12300      | 0.17402       |
| 0.11800      | 0.17077       |
| 0.11300      | 0.17043       |
| 0.10800      | 0.17296       |
| 0.10300      | 0.17256       |
| 0.098000     | 0.16873       |
| 0.093000     | 0.16810       |
| 0.088000     | 0.17089       |
| 0.083000     | 0.17038       |
| 0.078000     | 0.16668       |
| 0.073000     | 0.16652       |
| 0.068000     | 0.16942       |
| 0.063000     | 0.16869       |
| 0.058000     | 0.16493       |
| 0.053000     | 0.16487       |
| 0.048000     | 0.16765       |
| 0.043000     | 0.16695       |
| 0.038000     | 0.16357       |
| 0.033000     | 0.16294       |
| 0.028000     | 0.16516       |
| 0.023000     | 0.16452       |
| 0.018000     | 0.16025       |
| 0.013000     | 0.15920       |
| 0.0080000    | 0.16174       |
| 0.0030000    | 0.16040       |
| -0.0020000   | 0.15550       |
| -0.0070000   | 0.15430       |
| -0.012000    | 0.15585       |



| <b>E (V)</b> | <b>i (nA)</b> |
|--------------|---------------|
| -0.017000    | 0.15344       |
| -0.022000    | 0.14786       |
| -0.027000    | 0.14510       |
| -0.032000    | 0.14456       |
| -0.037000    | 0.14040       |
| -0.042000    | 0.13294       |
| -0.047000    | 0.12771       |
| -0.052000    | 0.12421       |
| -0.057000    | 0.11670       |
| -0.062000    | 0.10555       |
| -0.067000    | 0.096180      |
| -0.072000    | 0.088650      |
| -0.077000    | 0.077000      |
| -0.082000    | 0.060530      |
| -0.087000    | 0.046660      |
| -0.092000    | 0.035200      |
| -0.097000    | 0.018570      |
| -0.10200     | -0.0018100    |
| -0.10700     | -0.019130     |
| -0.11200     | -0.034120     |
| -0.11700     | -0.052760     |
| -0.12200     | -0.074250     |
| -0.12700     | -0.092290     |
| -0.13200     | -0.10693      |
| -0.13700     | -0.12387      |
| -0.14200     | -0.14329      |
| -0.14700     | -0.15894      |
| -0.15200     | -0.17031      |
| -0.15700     | -0.18347      |
| -0.16200     | -0.19866      |
| -0.16700     | -0.20962      |
| -0.17200     | -0.21603      |
| -0.17700     | -0.22482      |
| -0.18200     | -0.23575      |
| -0.18700     | -0.24171      |

| <b>E (V)</b> | <b>i (nA)</b> |
|--------------|---------------|
| -0.19200     | -0.24405      |
| -0.19700     | -0.24903      |
| -0.20200     | -0.25582      |
| -0.20700     | -0.25869      |
| -0.21200     | -0.25773      |
| -0.21700     | -0.25951      |
| -0.22200     | -0.26398      |
| -0.22700     | -0.26474      |
| -0.23200     | -0.26208      |
| -0.23700     | -0.26231      |
| -0.24200     | -0.26571      |
| -0.24700     | -0.26586      |
| -0.25200     | -0.26219      |
| -0.25700     | -0.26169      |
| -0.26200     | -0.26481      |
| -0.26700     | -0.26407      |
| -0.27200     | -0.26024      |
| -0.27700     | -0.25964      |
| -0.28200     | -0.26198      |
| -0.28700     | -0.26170      |
| -0.29200     | -0.25810      |
| -0.29700     | -0.25754      |
| -0.30200     | -0.25972      |
| -0.30700     | -0.25902      |
| -0.31200     | -0.25575      |
| -0.31700     | -0.25549      |
| -0.32200     | -0.25797      |
| -0.32700     | -0.25761      |
| -0.33200     | -0.25406      |
| -0.33700     | -0.25356      |
| -0.34200     | -0.25744      |
| -0.34700     | -0.25419      |

### 8.3.12 CV-12

| <b>E (V)</b> | <b>i (nA)</b> |
|--------------|---------------|
|--------------|---------------|

| <b>E (V)</b> | <b>i (nA)</b> |
|--------------|---------------|
| -0.34800     | -0.24741      |
| -0.34300     | -0.23719      |
| -0.33800     | -0.23636      |
| -0.33300     | -0.23390      |
| -0.32800     | -0.22853      |
| -0.32300     | -0.22681      |
| -0.31800     | -0.22798      |
| -0.31300     | -0.22652      |
| -0.30800     | -0.22178      |
| -0.30300     | -0.21995      |
| -0.29800     | -0.22147      |
| -0.29300     | -0.22031      |
| -0.28800     | -0.21547      |
| -0.28300     | -0.21315      |
| -0.27800     | -0.21489      |
| -0.27300     | -0.21363      |
| -0.26800     | -0.20864      |
| -0.26300     | -0.20672      |
| -0.25800     | -0.20799      |
| -0.25300     | -0.20581      |
| -0.24800     | -0.20056      |
| -0.24300     | -0.19842      |
| -0.23800     | -0.19852      |
| -0.23300     | -0.19529      |
| -0.22800     | -0.18923      |
| -0.22300     | -0.18561      |
| -0.21800     | -0.18443      |
| -0.21300     | -0.17996      |
| -0.20800     | -0.17156      |
| -0.20300     | -0.16548      |
| -0.19800     | -0.16213      |
| -0.19300     | -0.15481      |
| -0.18800     | -0.14334      |
| -0.18300     | -0.13426      |
| -0.17800     | -0.12769      |

| <b>E (V)</b> | <b>i (nA)</b> |
|--------------|---------------|
| -0.17300     | -0.11674      |
| -0.16800     | -0.10151      |
| -0.16300     | -0.088820     |
| -0.15800     | -0.077960     |
| -0.15300     | -0.063110     |
| -0.14800     | -0.044880     |
| -0.14300     | -0.028460     |
| -0.13800     | -0.014330     |
| -0.13300     | 0.0029200     |
| -0.12800     | 0.023640      |
| -0.12300     | 0.041610      |
| -0.11800     | 0.056220      |
| -0.11300     | 0.073400      |
| -0.10800     | 0.093520      |
| -0.10300     | 0.10963       |
| -0.098000    | 0.12145       |
| -0.093000    | 0.13588       |
| -0.088000    | 0.15177       |
| -0.083000    | 0.16261       |
| -0.078000    | 0.16959       |
| -0.073000    | 0.17874       |
| -0.068000    | 0.18933       |
| -0.063000    | 0.19518       |
| -0.058000    | 0.19707       |
| -0.053000    | 0.20121       |
| -0.048000    | 0.20762       |
| -0.043000    | 0.21049       |
| -0.038000    | 0.20909       |
| -0.033000    | 0.20997       |
| -0.028000    | 0.21428       |
| -0.023000    | 0.21503       |
| -0.018000    | 0.21192       |
| -0.013000    | 0.21219       |
| -0.0080000   | 0.21507       |
| -0.0030000   | 0.21479       |

| <b>E (V)</b> | <b>i (nA)</b> |
|--------------|---------------|
| 0.0020000    | 0.21189       |
| 0.0070000    | 0.21116       |
| 0.012000     | 0.21357       |
| 0.017000     | 0.21338       |
| 0.022000     | 0.20995       |
| 0.027000     | 0.20953       |
| 0.032000     | 0.21185       |
| 0.037000     | 0.21127       |
| 0.042000     | 0.20785       |
| 0.047000     | 0.20746       |
| 0.052000     | 0.21016       |
| 0.057000     | 0.20962       |
| 0.062000     | 0.20603       |
| 0.067000     | 0.20589       |
| 0.072000     | 0.20864       |
| 0.077000     | 0.20807       |
| 0.082000     | 0.20473       |
| 0.087000     | 0.20458       |
| 0.092000     | 0.20725       |
| 0.097000     | 0.20682       |
| 0.10200      | 0.20376       |
| 0.10700      | 0.20347       |
| 0.11200      | 0.20590       |
| 0.11700      | 0.20584       |
| 0.12200      | 0.20267       |
| 0.12700      | 0.20199       |
| 0.13200      | 0.20503       |
| 0.13700      | 0.20551       |
| 0.14200      | 0.20224       |
| 0.14700      | 0.20199       |
| 0.15200      | 0.20503       |
| 0.15700      | 0.20482       |
| 0.16200      | 0.20152       |
| 0.16700      | 0.20176       |
| 0.17200      | 0.20462       |

| <b>E (V)</b> | <b>i (nA)</b> |
|--------------|---------------|
| 0.17700      | 0.20442       |
| 0.18200      | 0.20127       |
| 0.18700      | 0.20114       |
| 0.19200      | 0.20463       |
| 0.19700      | 0.20189       |
| 0.19800      | 0.19463       |
| 0.19300      | 0.19301       |
| 0.18800      | 0.18701       |
| 0.18300      | 0.18780       |
| 0.17800      | 0.18324       |
| 0.17300      | 0.18232       |
| 0.16800      | 0.18494       |
| 0.16300      | 0.18420       |
| 0.15800      | 0.18040       |
| 0.15300      | 0.17973       |
| 0.14800      | 0.18246       |
| 0.14300      | 0.18132       |
| 0.13800      | 0.17824       |
| 0.13300      | 0.17778       |
| 0.12800      | 0.17980       |
| 0.12300      | 0.17957       |
| 0.11800      | 0.17668       |
| 0.11300      | 0.17630       |
| 0.10800      | 0.17880       |
| 0.10300      | 0.17863       |
| 0.098000     | 0.17511       |
| 0.093000     | 0.17446       |
| 0.088000     | 0.17690       |
| 0.083000     | 0.17613       |
| 0.078000     | 0.17233       |
| 0.073000     | 0.17226       |
| 0.068000     | 0.17493       |
| 0.063000     | 0.17431       |
| 0.058000     | 0.17092       |
| 0.053000     | 0.17058       |

| <b>E (V)</b> | <b>i (nA)</b> |
|--------------|---------------|
| 0.048000     | 0.17319       |
| 0.043000     | 0.17246       |
| 0.038000     | 0.16920       |
| 0.033000     | 0.16866       |
| 0.028000     | 0.17070       |
| 0.023000     | 0.17025       |
| 0.018000     | 0.16652       |
| 0.013000     | 0.16506       |
| 0.0080000    | 0.16677       |
| 0.0030000    | 0.16577       |
| -0.0020000   | 0.16103       |
| -0.0070000   | 0.15910       |
| -0.012000    | 0.16037       |
| -0.017000    | 0.15773       |
| -0.022000    | 0.15204       |
| -0.027000    | 0.14944       |
| -0.032000    | 0.14837       |
| -0.037000    | 0.14408       |
| -0.042000    | 0.13698       |
| -0.047000    | 0.13103       |
| -0.052000    | 0.12605       |
| -0.057000    | 0.11728       |
| -0.062000    | 0.10509       |
| -0.067000    | 0.094960      |
| -0.072000    | 0.086720      |
| -0.077000    | 0.074160      |
| -0.082000    | 0.057020      |
| -0.087000    | 0.041520      |
| -0.092000    | 0.028150      |
| -0.097000    | 0.011070      |
| -0.10200     | -0.0099900    |
| -0.10700     | -0.028800     |
| -0.11200     | -0.045040     |
| -0.11700     | -0.064380     |
| -0.12200     | -0.086400     |

| <b>E (V)</b> | <b>i (nA)</b> |
|--------------|---------------|
| -0.12700     | -0.10549      |
| -0.13200     | -0.12151      |
| -0.13700     | -0.13916      |
| -0.14200     | -0.15874      |
| -0.14700     | -0.17492      |
| -0.15200     | -0.18679      |
| -0.15700     | -0.20001      |
| -0.16200     | -0.21503      |
| -0.16700     | -0.22613      |
| -0.17200     | -0.23331      |
| -0.17700     | -0.24229      |
| -0.18200     | -0.25267      |
| -0.18700     | -0.25825      |
| -0.19200     | -0.26014      |
| -0.19700     | -0.26418      |
| -0.20200     | -0.26903      |
| -0.20700     | -0.27241      |
| -0.21200     | -0.27526      |
| -0.21700     | -0.27800      |
| -0.22200     | -0.28148      |
| -0.22700     | -0.28280      |
| -0.23200     | -0.28036      |
| -0.23700     | -0.27976      |
| -0.24200     | -0.28240      |
| -0.24700     | -0.28215      |
| -0.25200     | -0.27864      |
| -0.25700     | -0.27843      |
| -0.26200     | -0.28107      |
| -0.26700     | -0.28013      |
| -0.27200     | -0.27667      |
| -0.27700     | -0.27663      |
| -0.28200     | -0.27843      |
| -0.28700     | -0.27726      |
| -0.29200     | -0.27404      |
| -0.29700     | -0.27352      |



| <b>E (V)</b> | <b>i (nA)</b> |
|--------------|---------------|
| -0.30200     | -0.27511      |
| -0.30700     | -0.27433      |
| -0.31200     | -0.27128      |
| -0.31700     | -0.27057      |
| -0.32200     | -0.27310      |
| -0.32700     | -0.27235      |
| -0.33200     | -0.26888      |
| -0.33700     | -0.26775      |
| -0.34200     | -0.27092      |
| -0.34700     | -0.26868      |

### 8.3.13 CV-13

| <b>Column 1</b> | <b>Column 2</b> |
|-----------------|-----------------|
| -0.34800        | -0.25828        |
| -0.34300        | -0.24373        |
| -0.33800        | -0.24765        |
| -0.33300        | -0.24342        |
| -0.32800        | -0.24346        |
| -0.32300        | -0.24812        |
| -0.31800        | -0.24854        |
| -0.31300        | -0.24401        |
| -0.30800        | -0.23782        |
| -0.30300        | -0.23630        |
| -0.29800        | -0.23783        |
| -0.29300        | -0.23713        |
| -0.28800        | -0.23252        |
| -0.28300        | -0.23073        |
| -0.27800        | -0.23175        |
| -0.27300        | -0.22957        |
| -0.26800        | -0.22479        |
| -0.26300        | -0.22306        |
| -0.25800        | -0.22401        |
| -0.25300        | -0.22104        |
| -0.24800        | -0.21557        |
| -0.24300        | -0.21316        |

| <b>Column 1</b> | <b>Column 2</b> |
|-----------------|-----------------|
| -0.23800        | -0.21293        |
| -0.23300        | -0.20971        |
| -0.22800        | -0.20415        |
| -0.22300        | -0.20028        |
| -0.21800        | -0.19843        |
| -0.21300        | -0.19509        |
| -0.20800        | -0.18789        |
| -0.20300        | -0.18194        |
| -0.19800        | -0.17907        |
| -0.19300        | -0.17341        |
| -0.18800        | -0.16329        |
| -0.18300        | -0.15181        |
| -0.17800        | -0.13602        |
| -0.17300        | -0.11726        |
| -0.16800        | -0.11271        |
| -0.16300        | -0.11687        |
| -0.15800        | -0.10560        |
| -0.15300        | -0.084640       |
| -0.14800        | -0.065600       |
| -0.14300        | -0.047590       |
| -0.13800        | -0.030930       |
| -0.13300        | -0.012010       |
| -0.12800        | 0.0095100       |
| -0.12300        | 0.028150        |
| -0.11800        | 0.043970        |
| -0.11300        | 0.062440        |
| -0.10800        | 0.083140        |
| -0.10300        | 0.099950        |
| -0.098000       | 0.11292         |
| -0.093000       | 0.12745         |
| -0.088000       | 0.14301         |
| -0.083000       | 0.15425         |
| -0.078000       | 0.16099         |
| -0.073000       | 0.16668         |
| -0.068000       | 0.17245         |

| <b>Column 1</b> | <b>Column 2</b> |
|-----------------|-----------------|
| -0.063000       | 0.17577         |
| -0.058000       | 0.17736         |
| -0.053000       | 0.18246         |
| -0.048000       | 0.19161         |
| -0.043000       | 0.20306         |
| -0.038000       | 0.21255         |
| -0.033000       | 0.21355         |
| -0.028000       | 0.21085         |
| -0.023000       | 0.20853         |
| -0.018000       | 0.20018         |
| -0.013000       | 0.19061         |
| -0.0080000      | 0.18878         |
| -0.0030000      | 0.19130         |
| 0.0020000       | 0.19390         |
| 0.0070000       | 0.19746         |
| 0.012000        | 0.20114         |
| 0.017000        | 0.20171         |
| 0.022000        | 0.19969         |
| 0.027000        | 0.19855         |
| 0.032000        | 0.19891         |
| 0.037000        | 0.19641         |
| 0.042000        | 0.19144         |
| 0.047000        | 0.19183         |
| 0.052000        | 0.19824         |
| 0.057000        | 0.20194         |
| 0.062000        | 0.20077         |
| 0.067000        | 0.20220         |
| 0.072000        | 0.20671         |
| 0.077000        | 0.20794         |
| 0.082000        | 0.20653         |
| 0.087000        | 0.20734         |
| 0.092000        | 0.21007         |
| 0.097000        | 0.21139         |
| 0.10200         | 0.20854         |
| 0.10700         | 0.20587         |

| <b>Column 1</b> | <b>Column 2</b> |
|-----------------|-----------------|
| 0.11200         | 0.20821         |
| 0.11700         | 0.20906         |
| 0.12200         | 0.20655         |
| 0.12700         | 0.20626         |
| 0.13200         | 0.20961         |
| 0.13700         | 0.21057         |
| 0.14200         | 0.20883         |
| 0.14700         | 0.21110         |
| 0.15200         | 0.21603         |
| 0.15700         | 0.21630         |
| 0.16200         | 0.21291         |
| 0.16700         | 0.21548         |
| 0.17200         | 0.21959         |
| 0.17700         | 0.21998         |
| 0.18200         | 0.21640         |
| 0.18700         | 0.21623         |
| 0.19200         | 0.21858         |
| 0.19700         | 0.21338         |
| 0.19800         | 0.21490         |
| 0.19300         | 0.20763         |
| 0.18800         | 0.19890         |
| 0.18300         | 0.19882         |
| 0.17800         | 0.19340         |
| 0.17300         | 0.19216         |
| 0.16800         | 0.20029         |
| 0.16300         | 0.21088         |
| 0.15800         | 0.22275         |
| 0.15300         | 0.22644         |
| 0.14800         | 0.23017         |
| 0.14300         | 0.23431         |
| 0.13800         | 0.24216         |
| 0.13300         | 0.26288         |
| 0.12800         | 0.27425         |
| 0.12300         | 0.25539         |
| 0.11800         | 0.22267         |

| <b>Column 1</b> | <b>Column 2</b> |
|-----------------|-----------------|
| 0.11300         | 0.20305         |
| 0.10800         | 0.19035         |
| 0.10300         | 0.17472         |
| 0.098000        | 0.16841         |
| 0.093000        | 0.17360         |
| 0.088000        | 0.17998         |
| 0.083000        | 0.18420         |
| 0.078000        | 0.18695         |
| 0.073000        | 0.19176         |
| 0.068000        | 0.19773         |
| 0.063000        | 0.19779         |
| 0.058000        | 0.19258         |
| 0.053000        | 0.18993         |
| 0.048000        | 0.19098         |
| 0.043000        | 0.19354         |
| 0.038000        | 0.19750         |
| 0.033000        | 0.20202         |
| 0.028000        | 0.21060         |
| 0.023000        | 0.21634         |
| 0.018000        | 0.21933         |
| 0.013000        | 0.22248         |
| 0.0080000       | 0.21539         |
| 0.0030000       | 0.21302         |
| -0.0020000      | 0.21799         |
| -0.0070000      | 0.21199         |
| -0.012000       | 0.20547         |
| -0.017000       | 0.19515         |
| -0.022000       | 0.17978         |
| -0.027000       | 0.13979         |
| -0.032000       | 0.053070        |
| -0.037000       | 0.049570        |
| -0.042000       | 0.13602         |
| -0.047000       | 0.14966         |
| -0.052000       | 0.13279         |
| -0.057000       | 0.13779         |

| <b>Column 1</b> | <b>Column 2</b> |
|-----------------|-----------------|
| -0.062000       | 0.12768         |
| -0.067000       | 0.12122         |
| -0.072000       | 0.11885         |
| -0.077000       | 0.11063         |
| -0.082000       | 0.096840        |
| -0.087000       | 0.081060        |
| -0.092000       | 0.067990        |
| -0.097000       | 0.051180        |
| -0.10200        | 0.025980        |
| -0.10700        | 0.0024100       |
| -0.11200        | -0.013910       |
| -0.11700        | -0.029160       |
| -0.12200        | -0.043980       |
| -0.12700        | -0.061710       |
| -0.13200        | -0.078610       |
| -0.13700        | -0.083860       |
| -0.14200        | -0.098170       |
| -0.14700        | -0.13277        |
| -0.15200        | -0.15996        |
| -0.15700        | -0.17874        |
| -0.16200        | -0.19481        |
| -0.16700        | -0.20420        |
| -0.17200        | -0.21233        |
| -0.17700        | -0.22042        |
| -0.18200        | -0.22578        |
| -0.18700        | -0.22449        |
| -0.19200        | -0.22146        |
| -0.19700        | -0.22425        |
| -0.20200        | -0.23265        |
| -0.20700        | -0.23811        |
| -0.21200        | -0.24154        |
| -0.21700        | -0.24655        |
| -0.22200        | -0.25349        |
| -0.22700        | -0.25807        |
| -0.23200        | -0.25519        |

| <b>Column 1</b> | <b>Column 2</b> |
|-----------------|-----------------|
| -0.23700        | -0.24938        |
| -0.24200        | -0.24544        |
| -0.24700        | -0.24380        |
| -0.25200        | -0.24044        |
| -0.25700        | -0.24138        |
| -0.26200        | -0.24170        |
| -0.26700        | -0.24339        |
| -0.27200        | -0.24218        |
| -0.27700        | -0.24492        |
| -0.28200        | -0.25038        |
| -0.28700        | -0.25662        |
| -0.29200        | -0.27651        |
| -0.29700        | -0.27992        |
| -0.30200        | -0.38197        |
| -0.30700        | -0.47342        |
| -0.31200        | -0.34292        |
| -0.31700        | -0.26855        |
| -0.32200        | -0.30780        |
| -0.32700        | -0.29254        |
| -0.33200        | -0.29427        |
| -0.33700        | -0.31722        |
| -0.34200        | -0.34199        |
| -0.34700        | -0.36099        |

### 8.3.14 CV-14

| <b>Column 1</b> | <b>Column 2</b> |
|-----------------|-----------------|
| -0.34800        | -0.34692        |
| -0.34300        | -0.28902        |
| -0.33800        | -0.30494        |
| -0.33300        | -0.29176        |
| -0.32800        | -0.27576        |
| -0.32300        | -0.26838        |
| -0.31800        | -0.26805        |
| -0.31300        | -0.26812        |
| -0.30800        | -0.26089        |

| <b>Column 1</b> | <b>Column 2</b> |
|-----------------|-----------------|
| -0.30300        | -0.25315        |
| -0.29800        | -0.25005        |
| -0.29300        | -0.25422        |
| -0.28800        | -0.25636        |
| -0.28300        | -0.25986        |
| -0.27800        | -0.26593        |
| -0.27300        | -0.26997        |
| -0.26800        | -0.27293        |
| -0.26300        | -0.27713        |
| -0.25800        | -0.28218        |
| -0.25300        | -0.28382        |
| -0.24800        | -0.28085        |
| -0.24300        | -0.27255        |
| -0.23800        | -0.26733        |
| -0.23300        | -0.26760        |
| -0.22800        | -0.26155        |
| -0.22300        | -0.25356        |
| -0.21800        | -0.25560        |
| -0.21300        | -0.25598        |
| -0.20800        | -0.24611        |
| -0.20300        | -0.23746        |
| -0.19800        | -0.23271        |
| -0.19300        | -0.22531        |
| -0.18800        | -0.21521        |
| -0.18300        | -0.20601        |
| -0.17800        | -0.19762        |
| -0.17300        | -0.18868        |
| -0.16800        | -0.17762        |
| -0.16300        | -0.16309        |
| -0.15800        | -0.15158        |
| -0.15300        | -0.14600        |
| -0.14800        | -0.13926        |
| -0.14300        | -0.13612        |
| -0.13800        | -0.13470        |
| -0.13300        | -0.12101        |



| <b>Column 1</b> | <b>Column 2</b> |
|-----------------|-----------------|
| -0.12800        | -0.096400       |
| -0.12300        | -0.067580       |
| -0.11800        | -0.045400       |
| -0.11300        | -0.030980       |
| -0.10800        | -0.0090900      |
| -0.10300        | 0.019970        |
| -0.098000       | 0.042790        |
| -0.093000       | 0.061080        |
| -0.088000       | 0.083700        |
| -0.083000       | 0.10580         |
| -0.078000       | 0.12308         |
| -0.073000       | 0.13586         |
| -0.068000       | 0.14949         |
| -0.063000       | 0.16755         |
| -0.058000       | 0.18106         |
| -0.053000       | 0.19032         |
| -0.048000       | 0.20062         |
| -0.043000       | 0.21200         |
| -0.038000       | 0.22000         |
| -0.033000       | 0.22015         |
| -0.028000       | 0.21976         |
| -0.023000       | 0.21798         |
| -0.018000       | 0.21229         |
| -0.013000       | 0.21304         |
| -0.0080000      | 0.21732         |
| -0.0030000      | 0.21863         |
| 0.0020000       | 0.22077         |
| 0.0070000       | 0.22567         |
| 0.012000        | 0.23194         |
| 0.017000        | 0.23643         |
| 0.022000        | 0.23837         |
| 0.027000        | 0.23898         |
| 0.032000        | 0.24033         |
| 0.037000        | 0.24069         |
| 0.042000        | 0.23840         |

| <b>Column 1</b> | <b>Column 2</b> |
|-----------------|-----------------|
| 0.047000        | 0.23722         |
| 0.052000        | 0.23853         |
| 0.057000        | 0.23884         |
| 0.062000        | 0.23723         |
| 0.067000        | 0.23859         |
| 0.072000        | 0.24115         |
| 0.077000        | 0.24078         |
| 0.082000        | 0.23946         |
| 0.087000        | 0.24145         |
| 0.092000        | 0.24607         |
| 0.097000        | 0.24978         |
| 0.10200         | 0.25380         |
| 0.10700         | 0.26088         |
| 0.11200         | 0.27046         |
| 0.11700         | 0.27853         |
| 0.12200         | 0.28482         |
| 0.12700         | 0.29195         |
| 0.13200         | 0.30284         |
| 0.13700         | 0.31185         |
| 0.14200         | 0.31737         |
| 0.14700         | 0.32148         |
| 0.15200         | 0.31959         |
| 0.15700         | 0.31152         |
| 0.16200         | 0.30087         |
| 0.16700         | 0.29249         |
| 0.17200         | 0.28220         |
| 0.17700         | 0.27531         |
| 0.18200         | 0.26959         |
| 0.18700         | 0.27064         |
| 0.19200         | 0.27259         |
| 0.19700         | 0.26206         |
| 0.19800         | 0.26890         |
| 0.19300         | 0.26402         |
| 0.18800         | 0.25062         |
| 0.18300         | 0.25949         |

| <b>Column 1</b> | <b>Column 2</b> |
|-----------------|-----------------|
| 0.17800         | 0.25909         |
| 0.17300         | 0.25839         |
| 0.16800         | 0.25629         |
| 0.16300         | 0.24763         |
| 0.15800         | 0.24510         |
| 0.15300         | 0.24518         |
| 0.14800         | 0.24163         |
| 0.14300         | 0.24198         |
| 0.13800         | 0.25038         |
| 0.13300         | 0.25091         |
| 0.12800         | 0.25165         |
| 0.12300         | 0.25387         |
| 0.11800         | 0.24247         |
| 0.11300         | 0.23256         |
| 0.10800         | 0.24105         |
| 0.10300         | 0.25002         |
| 0.098000        | 0.24109         |
| 0.093000        | 0.24251         |
| 0.088000        | 0.25579         |
| 0.083000        | 0.24502         |
| 0.078000        | 0.22259         |
| 0.073000        | 0.20646         |
| 0.068000        | 0.19414         |
| 0.063000        | 0.18128         |
| 0.058000        | 0.14611         |
| 0.053000        | 0.11832         |
| 0.048000        | 0.13667         |
| 0.043000        | 0.15056         |
| 0.038000        | 0.14069         |
| 0.033000        | 0.14631         |
| 0.028000        | 0.16561         |
| 0.023000        | 0.17791         |
| 0.018000        | 0.17799         |
| 0.013000        | 0.17448         |
| 0.0080000       | 0.17334         |

| <b>Column 1</b> | <b>Column 2</b> |
|-----------------|-----------------|
| 0.0030000       | 0.16783         |
| -0.0020000      | 0.15885         |
| -0.0070000      | 0.15812         |
| -0.012000       | 0.16800         |
| -0.017000       | 0.17584         |
| -0.022000       | 0.17622         |
| -0.027000       | 0.17997         |
| -0.032000       | 0.18699         |
| -0.037000       | 0.19050         |
| -0.042000       | 0.20221         |
| -0.047000       | 0.22014         |
| -0.052000       | 0.23274         |
| -0.057000       | 0.23946         |
| -0.062000       | 0.23394         |
| -0.067000       | 0.22287         |
| -0.072000       | 0.20940         |
| -0.077000       | 0.18442         |
| -0.082000       | 0.15298         |
| -0.087000       | 0.12544         |
| -0.092000       | 0.10483         |
| -0.097000       | 0.081000        |
| -0.10200        | 0.044590        |
| -0.10700        | -0.0091100      |
| -0.11200        | -0.069410       |
| -0.11700        | -0.10750        |
| -0.12200        | -0.12860        |
| -0.12700        | -0.15369        |
| -0.13200        | -0.17326        |
| -0.13700        | -0.19792        |
| -0.14200        | -0.23970        |
| -0.14700        | -0.25921        |
| -0.15200        | -0.25457        |
| -0.15700        | -0.26712        |
| -0.16200        | -0.29121        |
| -0.16700        | -0.30488        |

| <b>Column 1</b> | <b>Column 2</b> |
|-----------------|-----------------|
| -0.17200        | -0.31816        |
| -0.17700        | -0.33636        |
| -0.18200        | -0.34679        |
| -0.18700        | -0.35969        |
| -0.19200        | -0.37292        |
| -0.19700        | -0.36566        |
| -0.20200        | -0.35100        |
| -0.20700        | -0.34349        |
| -0.21200        | -0.34060        |
| -0.21700        | -0.33724        |
| -0.22200        | -0.32758        |
| -0.22700        | -0.31563        |
| -0.23200        | -0.30907        |
| -0.23700        | -0.30526        |
| -0.24200        | -0.30353        |
| -0.24700        | -0.30248        |
| -0.25200        | -0.30394        |
| -0.25700        | -0.31750        |
| -0.26200        | -0.32828        |
| -0.26700        | -0.32909        |
| -0.27200        | -0.32804        |
| -0.27700        | -0.32403        |
| -0.28200        | -0.32105        |
| -0.28700        | -0.31646        |
| -0.29200        | -0.31241        |
| -0.29700        | -0.31699        |
| -0.30200        | -0.32209        |
| -0.30700        | -0.32250        |
| -0.31200        | -0.32470        |
| -0.31700        | -0.33299        |
| -0.32200        | -0.34433        |
| -0.32700        | -0.35416        |
| -0.33200        | -0.36693        |
| -0.33700        | -0.37480        |
| -0.34200        | -0.37653        |

| Column 1 | Column 2 |
|----------|----------|
| -0.34700 | -0.36703 |

### 8.3.15 CV-15

| Column 1 | Column 2 |
|----------|----------|
| -0.34800 | -0.33835 |
| -0.34300 | -0.30134 |
| -0.33800 | -0.32341 |
| -0.33300 | -0.30983 |
| -0.32800 | -0.29971 |
| -0.32300 | -0.28583 |
| -0.31800 | -0.27385 |
| -0.31300 | -0.25484 |
| -0.30800 | -0.23860 |
| -0.30300 | -0.24450 |
| -0.29800 | -0.25070 |
| -0.29300 | -0.24951 |
| -0.28800 | -0.25359 |
| -0.28300 | -0.26306 |
| -0.27800 | -0.27249 |
| -0.27300 | -0.27656 |
| -0.26800 | -0.27004 |
| -0.26300 | -0.26338 |
| -0.25800 | -0.26541 |
| -0.25300 | -0.28120 |
| -0.24800 | -0.28909 |
| -0.24300 | -0.27379 |
| -0.23800 | -0.27085 |
| -0.23300 | -0.27147 |
| -0.22800 | -0.25002 |
| -0.22300 | -0.22765 |
| -0.21800 | -0.21467 |
| -0.21300 | -0.20765 |
| -0.20800 | -0.20602 |
| -0.20300 | -0.20856 |
| -0.19800 | -0.21743 |

| <b>Column 1</b> | <b>Column 2</b> |
|-----------------|-----------------|
| -0.19300        | -0.21888        |
| -0.18800        | -0.21042        |
| -0.18300        | -0.20935        |
| -0.17800        | -0.20701        |
| -0.17300        | -0.19877        |
| -0.16800        | -0.19041        |
| -0.16300        | -0.17837        |
| -0.15800        | -0.16177        |
| -0.15300        | -0.14258        |
| -0.14800        | -0.12246        |
| -0.14300        | -0.10363        |
| -0.13800        | -0.096390       |
| -0.13300        | -0.10216        |
| -0.12800        | -0.10684        |
| -0.12300        | -0.063430       |
| -0.11800        | 0.043970        |
| -0.11300        | 0.12080         |
| -0.10800        | 0.13997         |
| -0.10300        | 0.16553         |
| -0.098000       | 0.18642         |
| -0.093000       | 0.19874         |
| -0.088000       | 0.21891         |
| -0.083000       | 0.22395         |
| -0.078000       | 0.21929         |
| -0.073000       | 0.22170         |
| -0.068000       | 0.22665         |
| -0.063000       | 0.23413         |
| -0.058000       | 0.24411         |
| -0.053000       | 0.25203         |
| -0.048000       | 0.25681         |
| -0.043000       | 0.25534         |
| -0.038000       | 0.25210         |
| -0.033000       | 0.25030         |
| -0.028000       | 0.25038         |
| -0.023000       | 0.24791         |

| <b>Column 1</b> | <b>Column 2</b> |
|-----------------|-----------------|
| -0.018000       | 0.24734         |
| -0.013000       | 0.25093         |
| -0.0080000      | 0.26196         |
| -0.0030000      | 0.34871         |
| 0.0020000       | 0.42450         |
| 0.0070000       | 0.36591         |
| 0.012000        | 0.30833         |
| 0.017000        | 0.30626         |
| 0.022000        | 0.30030         |
| 0.027000        | 0.29660         |
| 0.032000        | 0.29076         |
| 0.037000        | 0.28537         |
| 0.042000        | 0.28194         |
| 0.047000        | 0.28186         |
| 0.052000        | 0.28854         |
| 0.057000        | 0.29474         |
| 0.062000        | 0.29224         |
| 0.067000        | 0.28166         |
| 0.072000        | 0.26930         |
| 0.077000        | 0.25939         |
| 0.082000        | 0.25663         |
| 0.087000        | 0.25151         |
| 0.092000        | 0.21604         |
| 0.097000        | 0.11825         |
| 0.10200         | 0.013130        |
| 0.10700         | -7.3961E-4      |
| 0.11200         | 0.035050        |
| 0.11700         | 0.038880        |
| 0.12200         | 0.037350        |
| 0.12700         | 0.051560        |
| 0.13200         | 0.055850        |
| 0.13700         | 0.056100        |
| 0.14200         | 0.064160        |
| 0.14700         | 0.067390        |
| 0.15200         | 0.070130        |



| <b>Column 1</b> | <b>Column 2</b> |
|-----------------|-----------------|
| 0.15700         | 0.078380        |
| 0.16200         | 0.081060        |
| 0.16700         | 0.081270        |
| 0.17200         | 0.084100        |
| 0.17700         | 0.092370        |
| 0.18200         | 0.099410        |
| 0.18700         | 0.093620        |
| 0.19200         | 0.094510        |
| 0.19700         | 0.12194         |
| 0.19800         | 0.12437         |
| 0.19300         | 0.12463         |
| 0.18800         | 0.10374         |
| 0.18300         | 0.11304         |
| 0.17800         | 0.11791         |
| 0.17300         | 0.12649         |
| 0.16800         | 0.13801         |
| 0.16300         | 0.14806         |
| 0.15800         | 0.15785         |
| 0.15300         | 0.16542         |
| 0.14800         | 0.17401         |
| 0.14300         | 0.17976         |
| 0.13800         | 0.18448         |
| 0.13300         | 0.18980         |
| 0.12800         | 0.19477         |
| 0.12300         | 0.19648         |
| 0.11800         | 0.19311         |
| 0.11300         | 0.18553         |
| 0.10800         | 0.18373         |
| 0.10300         | 0.19622         |
| 0.098000        | 0.21153         |
| 0.093000        | 0.22226         |
| 0.088000        | 0.22801         |
| 0.083000        | 0.21337         |
| 0.078000        | 0.19363         |
| 0.073000        | 0.20134         |

| <b>Column 1</b> | <b>Column 2</b> |
|-----------------|-----------------|
| 0.068000        | 0.22014         |
| 0.063000        | 0.22816         |
| 0.058000        | 0.22151         |
| 0.053000        | 0.21362         |
| 0.048000        | 0.21842         |
| 0.043000        | 0.22358         |
| 0.038000        | 0.22305         |
| 0.033000        | 0.22130         |
| 0.028000        | 0.21998         |
| 0.023000        | 0.21643         |
| 0.018000        | 0.21268         |
| 0.013000        | 0.21253         |
| 0.0080000       | 0.20937         |
| 0.0030000       | 0.20121         |
| -0.0020000      | 0.19647         |
| -0.0070000      | 0.19665         |
| -0.012000       | 0.19244         |
| -0.017000       | 0.18605         |
| -0.022000       | 0.18471         |
| -0.027000       | 0.18217         |
| -0.032000       | 0.17353         |
| -0.037000       | 0.16276         |
| -0.042000       | 0.15059         |
| -0.047000       | 0.13325         |
| -0.052000       | 0.11196         |
| -0.057000       | 0.094620        |
| -0.062000       | 0.087220        |
| -0.067000       | 0.085020        |
| -0.072000       | 0.079320        |
| -0.077000       | 0.067120        |
| -0.082000       | 0.051620        |
| -0.087000       | 0.037030        |
| -0.092000       | 0.020610        |
| -0.097000       | 7.5561E-4       |
| -0.10200        | -0.019310       |

| <b>Column 1</b> | <b>Column 2</b> |
|-----------------|-----------------|
| -0.10700        | -0.040320       |
| -0.11200        | -0.062510       |
| -0.11700        | -0.084950       |
| -0.12200        | -0.10837        |
| -0.12700        | -0.13224        |
| -0.13200        | -0.15511        |
| -0.13700        | -0.17584        |
| -0.14200        | -0.19598        |
| -0.14700        | -0.21492        |
| -0.15200        | -0.23036        |
| -0.15700        | -0.24381        |
| -0.16200        | -0.25670        |
| -0.16700        | -0.26827        |
| -0.17200        | -0.27809        |
| -0.17700        | -0.28758        |
| -0.18200        | -0.29675        |
| -0.18700        | -0.30449        |
| -0.19200        | -0.31048        |
| -0.19700        | -0.31388        |
| -0.20200        | -0.31495        |
| -0.20700        | -0.31643        |
| -0.21200        | -0.31892        |
| -0.21700        | -0.32085        |
| -0.22200        | -0.32156        |
| -0.22700        | -0.32037        |
| -0.23200        | -0.31866        |
| -0.23700        | -0.31684        |
| -0.24200        | -0.31499        |
| -0.24700        | -0.31254        |
| -0.25200        | -0.30998        |
| -0.25700        | -0.30902        |
| -0.26200        | -0.30731        |
| -0.26700        | -0.30408        |
| -0.27200        | -0.30080        |
| -0.27700        | -0.29868        |

| <b>Column 1</b> | <b>Column 2</b> |
|-----------------|-----------------|
| -0.28200        | -0.29713        |
| -0.28700        | -0.29551        |
| -0.29200        | -0.29285        |
| -0.29700        | -0.29005        |
| -0.30200        | -0.28896        |
| -0.30700        | -0.29221        |
| -0.31200        | -0.28606        |
| -0.31700        | -0.26576        |
| -0.32200        | -0.26156        |
| -0.32700        | -0.27044        |
| -0.33200        | -0.27587        |
| -0.33700        | -0.27725        |
| -0.34200        | -0.28180        |
| -0.34700        | -0.28134        |

### 8.3.16 CV-16

| <b>Column 1</b> | <b>Column 2</b> |
|-----------------|-----------------|
| -0.34800        | -0.26853        |
| -0.34300        | -0.24420        |
| -0.33800        | -0.26233        |
| -0.33300        | -0.25860        |
| -0.32800        | -0.26040        |
| -0.32300        | -0.26130        |
| -0.31800        | -0.25923        |
| -0.31300        | -0.25911        |
| -0.30800        | -0.25738        |
| -0.30300        | -0.25658        |
| -0.29800        | -0.25465        |
| -0.29300        | -0.25257        |
| -0.28800        | -0.24991        |
| -0.28300        | -0.24678        |
| -0.27800        | -0.24530        |
| -0.27300        | -0.24295        |
| -0.26800        | -0.24239        |
| -0.26300        | -0.24305        |

| <b>Column 1</b> | <b>Column 2</b> |
|-----------------|-----------------|
| -0.25800        | -0.24559        |
| -0.25300        | -0.25396        |
| -0.24800        | -0.26002        |
| -0.24300        | -0.31011        |
| -0.23800        | -0.33285        |
| -0.23300        | -0.25569        |
| -0.22800        | -0.22382        |
| -0.22300        | -0.23413        |
| -0.21800        | -0.21683        |
| -0.21300        | -0.20431        |
| -0.20800        | -0.19178        |
| -0.20300        | -0.18319        |
| -0.19800        | -0.17728        |
| -0.19300        | -0.17150        |
| -0.18800        | -0.16510        |
| -0.18300        | -0.15655        |
| -0.17800        | -0.14731        |
| -0.17300        | -0.13370        |
| -0.16800        | -0.12019        |
| -0.16300        | -0.10634        |
| -0.15800        | -0.091050       |
| -0.15300        | -0.073080       |
| -0.14800        | -0.053930       |
| -0.14300        | -0.033430       |
| -0.13800        | -0.011270       |
| -0.13300        | 0.011890        |
| -0.12800        | 0.036550        |
| -0.12300        | 0.060170        |
| -0.11800        | 0.082670        |
| -0.11300        | 0.10522         |
| -0.10800        | 0.12670         |
| -0.10300        | 0.14596         |
| -0.098000       | 0.16544         |
| -0.093000       | 0.18455         |
| -0.088000       | 0.20063         |

| <b>Column 1</b> | <b>Column 2</b> |
|-----------------|-----------------|
| -0.083000       | 0.21338         |
| -0.078000       | 0.22513         |
| -0.073000       | 0.23616         |
| -0.068000       | 0.24551         |
| -0.063000       | 0.25378         |
| -0.058000       | 0.26029         |
| -0.053000       | 0.26479         |
| -0.048000       | 0.26740         |
| -0.043000       | 0.26896         |
| -0.038000       | 0.26850         |
| -0.033000       | 0.26692         |
| -0.028000       | 0.26518         |
| -0.023000       | 0.26341         |
| -0.018000       | 0.26151         |
| -0.013000       | 0.27127         |
| -0.0080000      | 0.29490         |
| -0.0030000      | 0.29753         |
| 0.0020000       | 0.27281         |
| 0.0070000       | 0.25364         |
| 0.012000        | 0.24967         |
| 0.017000        | 0.24950         |
| 0.022000        | 0.24817         |
| 0.027000        | 0.24529         |
| 0.032000        | 0.24482         |
| 0.037000        | 0.25196         |
| 0.042000        | 0.26219         |
| 0.047000        | 0.26747         |
| 0.052000        | 0.26596         |
| 0.057000        | 0.26761         |
| 0.062000        | 0.27474         |
| 0.067000        | 0.27989         |
| 0.072000        | 0.28351         |
| 0.077000        | 0.28113         |
| 0.082000        | 0.27122         |
| 0.087000        | 0.26049         |

| <b>Column 1</b> | <b>Column 2</b> |
|-----------------|-----------------|
| 0.092000        | 0.24206         |
| 0.097000        | 0.21926         |
| 0.10200         | 0.21191         |
| 0.10700         | 0.20485         |
| 0.11200         | 0.17444         |
| 0.11700         | 0.15967         |
| 0.12200         | 0.17446         |
| 0.12700         | 0.17377         |
| 0.13200         | 0.16875         |
| 0.13700         | 0.17107         |
| 0.14200         | 0.17042         |
| 0.14700         | 0.17405         |
| 0.15200         | 0.17905         |
| 0.15700         | 0.18611         |
| 0.16200         | 0.19238         |
| 0.16700         | 0.19809         |
| 0.17200         | 0.20220         |
| 0.17700         | 0.20777         |
| 0.18200         | 0.20878         |
| 0.18700         | 0.21120         |
| 0.19200         | 0.21537         |
| 0.19700         | 0.21256         |
| 0.19800         | 0.22563         |
| 0.19300         | 0.22781         |
| 0.18800         | 0.20125         |
| 0.18300         | 0.20604         |
| 0.17800         | 0.20208         |
| 0.17300         | 0.20108         |
| 0.16800         | 0.20375         |
| 0.16300         | 0.20223         |
| 0.15800         | 0.20185         |
| 0.15300         | 0.19896         |
| 0.14800         | 0.19923         |
| 0.14300         | 0.19930         |
| 0.13800         | 0.19907         |

| <b>Column 1</b> | <b>Column 2</b> |
|-----------------|-----------------|
| 0.13300         | 0.19621         |
| 0.12800         | 0.19577         |
| 0.12300         | 0.19660         |
| 0.11800         | 0.19652         |
| 0.11300         | 0.19880         |
| 0.10800         | 0.20089         |
| 0.10300         | 0.20200         |
| 0.098000        | 0.20242         |
| 0.093000        | 0.20387         |
| 0.088000        | 0.20535         |
| 0.083000        | 0.20800         |
| 0.078000        | 0.21113         |
| 0.073000        | 0.21255         |
| 0.068000        | 0.21159         |
| 0.063000        | 0.21000         |
| 0.058000        | 0.20970         |
| 0.053000        | 0.20892         |
| 0.048000        | 0.20786         |
| 0.043000        | 0.20720         |
| 0.038000        | 0.20685         |
| 0.033000        | 0.20634         |
| 0.028000        | 0.20699         |
| 0.023000        | 0.21243         |
| 0.018000        | 0.21751         |
| 0.013000        | 0.21333         |
| 0.0080000       | 0.20559         |
| 0.0030000       | 0.19962         |
| -0.0020000      | 0.19346         |
| -0.0070000      | 0.18790         |
| -0.012000       | 0.18270         |
| -0.017000       | 0.17801         |
| -0.022000       | 0.17380         |
| -0.027000       | 0.16993         |
| -0.032000       | 0.16495         |
| -0.037000       | 0.15882         |



| <b>Column 1</b> | <b>Column 2</b> |
|-----------------|-----------------|
| -0.042000       | 0.15260         |
| -0.047000       | 0.14497         |
| -0.052000       | 0.13588         |
| -0.057000       | 0.12541         |
| -0.062000       | 0.11356         |
| -0.067000       | 0.10040         |
| -0.072000       | 0.085910        |
| -0.077000       | 0.068940        |
| -0.082000       | 0.049650        |
| -0.087000       | 0.030020        |
| -0.092000       | 0.0099400       |
| -0.097000       | -0.011490       |
| -0.10200        | -0.033880       |
| -0.10700        | -0.056810       |
| -0.11200        | -0.081600       |
| -0.11700        | -0.10605        |
| -0.12200        | -0.13004        |
| -0.12700        | -0.15386        |
| -0.13200        | -0.17700        |
| -0.13700        | -0.20097        |
| -0.14200        | -0.22612        |
| -0.14700        | -0.25923        |
| -0.15200        | -0.28213        |
| -0.15700        | -0.27748        |
| -0.16200        | -0.27788        |
| -0.16700        | -0.29409        |
| -0.17200        | -0.30641        |
| -0.17700        | -0.31482        |
| -0.18200        | -0.32126        |
| -0.18700        | -0.32578        |
| -0.19200        | -0.32932        |
| -0.19700        | -0.33224        |
| -0.20200        | -0.33521        |
| -0.20700        | -0.33736        |
| -0.21200        | -0.33887        |

| Column 1 | Column 2 |
|----------|----------|
| -0.21700 | -0.34045 |
| -0.22200 | -0.34328 |
| -0.22700 | -0.34467 |
| -0.23200 | -0.34497 |
| -0.23700 | -0.34654 |
| -0.24200 | -0.34824 |
| -0.24700 | -0.34703 |
| -0.25200 | -0.34471 |
| -0.25700 | -0.34411 |
| -0.26200 | -0.34313 |
| -0.26700 | -0.34221 |
| -0.27200 | -0.34083 |
| -0.27700 | -0.34034 |
| -0.28200 | -0.33854 |
| -0.28700 | -0.33733 |
| -0.29200 | -0.33653 |
| -0.29700 | -0.33484 |
| -0.30200 | -0.33434 |
| -0.30700 | -0.33361 |
| -0.31200 | -0.33388 |
| -0.31700 | -0.33202 |
| -0.32200 | -0.33256 |
| -0.32700 | -0.33049 |
| -0.33200 | -0.33133 |
| -0.33700 | -0.33000 |
| -0.34200 | -0.32925 |
| -0.34700 | -0.33123 |

### 8.3.17 CV-17

| Column 1 | Column 2 |
|----------|----------|
| -0.34800 | -0.30269 |
| -0.34300 | -0.29107 |
| -0.33800 | -0.31219 |
| -0.33300 | -0.30356 |
| -0.32800 | -0.30215 |

| <b>Column 1</b> | <b>Column 2</b> |
|-----------------|-----------------|
| -0.32300        | -0.30108        |
| -0.31800        | -0.29782        |
| -0.31300        | -0.29749        |
| -0.30800        | -0.29382        |
| -0.30300        | -0.29272        |
| -0.29800        | -0.29048        |
| -0.29300        | -0.28953        |
| -0.28800        | -0.28745        |
| -0.28300        | -0.28676        |
| -0.27800        | -0.28553        |
| -0.27300        | -0.28364        |
| -0.26800        | -0.28220        |
| -0.26300        | -0.28011        |
| -0.25800        | -0.27822        |
| -0.25300        | -0.27569        |
| -0.24800        | -0.27415        |
| -0.24300        | -0.27177        |
| -0.23800        | -0.26920        |
| -0.23300        | -0.26612        |
| -0.22800        | -0.26260        |
| -0.22300        | -0.25897        |
| -0.21800        | -0.25495        |
| -0.21300        | -0.25064        |
| -0.20800        | -0.24546        |
| -0.20300        | -0.23943        |
| -0.19800        | -0.23244        |
| -0.19300        | -0.22379        |
| -0.18800        | -0.21350        |
| -0.18300        | -0.20318        |
| -0.17800        | -0.19137        |
| -0.17300        | -0.17767        |
| -0.16800        | -0.16205        |
| -0.16300        | -0.14567        |
| -0.15800        | -0.12934        |
| -0.15300        | -0.11150        |

| <b>Column 1</b> | <b>Column 2</b> |
|-----------------|-----------------|
| -0.14800        | -0.092390       |
| -0.14300        | -0.070910       |
| -0.13800        | -0.047290       |
| -0.13300        | -0.022920       |
| -0.12800        | 0.0013100       |
| -0.12300        | 0.024800        |
| -0.11800        | 0.047670        |
| -0.11300        | 0.070980        |
| -0.10800        | 0.094210        |
| -0.10300        | 0.11621         |
| -0.098000       | 0.13824         |
| -0.093000       | 0.15970         |
| -0.088000       | 0.17884         |
| -0.083000       | 0.19620         |
| -0.078000       | 0.21191         |
| -0.073000       | 0.22478         |
| -0.068000       | 0.23652         |
| -0.063000       | 0.24674         |
| -0.058000       | 0.25426         |
| -0.053000       | 0.26031         |
| -0.048000       | 0.26564         |
| -0.043000       | 0.27120         |
| -0.038000       | 0.27490         |
| -0.033000       | 0.27665         |
| -0.028000       | 0.27834         |
| -0.023000       | 0.27899         |
| -0.018000       | 0.27903         |
| -0.013000       | 0.27946         |
| -0.0080000      | 0.27893         |
| -0.0030000      | 0.27798         |
| 0.0020000       | 0.27759         |
| 0.0070000       | 0.27640         |
| 0.012000        | 0.27493         |
| 0.017000        | 0.27358         |
| 0.022000        | 0.27265         |

| <b>Column 1</b> | <b>Column 2</b> |
|-----------------|-----------------|
| 0.027000        | 0.27167         |
| 0.032000        | 0.27087         |
| 0.037000        | 0.27027         |
| 0.042000        | 0.26944         |
| 0.047000        | 0.26900         |
| 0.052000        | 0.26824         |
| 0.057000        | 0.26675         |
| 0.062000        | 0.26489         |
| 0.067000        | 0.26402         |
| 0.072000        | 0.26317         |
| 0.077000        | 0.26237         |
| 0.082000        | 0.26189         |
| 0.087000        | 0.26182         |
| 0.092000        | 0.26144         |
| 0.097000        | 0.26095         |
| 0.10200         | 0.26034         |
| 0.10700         | 0.25858         |
| 0.11200         | 0.25843         |
| 0.11700         | 0.25838         |
| 0.12200         | 0.25845         |
| 0.12700         | 0.25747         |
| 0.13200         | 0.25633         |
| 0.13700         | 0.25566         |
| 0.14200         | 0.25547         |
| 0.14700         | 0.25548         |
| 0.15200         | 0.25488         |
| 0.15700         | 0.25418         |
| 0.16200         | 0.25284         |
| 0.16700         | 0.25501         |
| 0.17200         | 0.25312         |
| 0.17700         | 0.25390         |
| 0.18200         | 0.25329         |
| 0.18700         | 0.25518         |
| 0.19200         | 0.25758         |
| 0.19700         | 0.25070         |

| <b>Column 1</b> | <b>Column 2</b> |
|-----------------|-----------------|
| 0.19800         | 0.26735         |
| 0.19300         | 0.26240         |
| 0.18800         | 0.23717         |
| 0.18300         | 0.24187         |
| 0.17800         | 0.23943         |
| 0.17300         | 0.23803         |
| 0.16800         | 0.23901         |
| 0.16300         | 0.23727         |
| 0.15800         | 0.23742         |
| 0.15300         | 0.23596         |
| 0.14800         | 0.23675         |
| 0.14300         | 0.23562         |
| 0.13800         | 0.23624         |
| 0.13300         | 0.23670         |
| 0.12800         | 0.23694         |
| 0.12300         | 0.23789         |
| 0.11800         | 0.23848         |
| 0.11300         | 0.23905         |
| 0.10800         | 0.24059         |
| 0.10300         | 0.24396         |
| 0.098000        | 0.24470         |
| 0.093000        | 0.24210         |
| 0.088000        | 0.23738         |
| 0.083000        | 0.23302         |
| 0.078000        | 0.22964         |
| 0.073000        | 0.22742         |
| 0.068000        | 0.22519         |
| 0.063000        | 0.22210         |
| 0.058000        | 0.22023         |
| 0.053000        | 0.21949         |
| 0.048000        | 0.21920         |
| 0.043000        | 0.21899         |
| 0.038000        | 0.21881         |
| 0.033000        | 0.21832         |
| 0.028000        | 0.21779         |

| <b>Column 1</b> | <b>Column 2</b> |
|-----------------|-----------------|
| 0.023000        | 0.21662         |
| 0.018000        | 0.21467         |
| 0.013000        | 0.21295         |
| 0.0080000       | 0.21178         |
| 0.0030000       | 0.21029         |
| -0.0020000      | 0.20740         |
| -0.0070000      | 0.20398         |
| -0.012000       | 0.20030         |
| -0.017000       | 0.19597         |
| -0.022000       | 0.19092         |
| -0.027000       | 0.18546         |
| -0.032000       | 0.17893         |
| -0.037000       | 0.17114         |
| -0.042000       | 0.16308         |
| -0.047000       | 0.15315         |
| -0.052000       | 0.14215         |
| -0.057000       | 0.12986         |
| -0.062000       | 0.11569         |
| -0.067000       | 0.10053         |
| -0.072000       | 0.083200        |
| -0.077000       | 0.063630        |
| -0.082000       | 0.032080        |
| -0.087000       | -0.0010300      |
| -0.092000       | -0.014150       |
| -0.097000       | -0.025360       |
| -0.10200        | -0.047760       |
| -0.10700        | -0.074060       |
| -0.11200        | -0.10062        |
| -0.11700        | -0.12492        |
| -0.12200        | -0.14967        |
| -0.12700        | -0.17467        |
| -0.13200        | -0.19862        |
| -0.13700        | -0.22065        |
| -0.14200        | -0.24066        |
| -0.14700        | -0.25974        |

| <b>Column 1</b> | <b>Column 2</b> |
|-----------------|-----------------|
| -0.15200        | -0.27732        |
| -0.15700        | -0.29311        |
| -0.16200        | -0.30676        |
| -0.16700        | -0.31857        |
| -0.17200        | -0.32871        |
| -0.17700        | -0.33856        |
| -0.18200        | -0.34673        |
| -0.18700        | -0.35301        |
| -0.19200        | -0.35852        |
| -0.19700        | -0.36244        |
| -0.20200        | -0.36510        |
| -0.20700        | -0.36686        |
| -0.21200        | -0.36819        |
| -0.21700        | -0.36795        |
| -0.22200        | -0.36722        |
| -0.22700        | -0.36676        |
| -0.23200        | -0.36616        |
| -0.23700        | -0.36545        |
| -0.24200        | -0.36529        |
| -0.24700        | -0.36472        |
| -0.25200        | -0.36405        |
| -0.25700        | -0.36464        |
| -0.26200        | -0.36414        |
| -0.26700        | -0.36312        |
| -0.27200        | -0.36192        |
| -0.27700        | -0.36168        |
| -0.28200        | -0.36028        |
| -0.28700        | -0.35873        |
| -0.29200        | -0.35779        |
| -0.29700        | -0.35730        |
| -0.30200        | -0.35671        |
| -0.30700        | -0.35483        |
| -0.31200        | -0.35470        |
| -0.31700        | -0.35281        |
| -0.32200        | -0.35297        |



| Column 1 | Column 2 |
|----------|----------|
| -0.32700 | -0.35085 |
| -0.33200 | -0.35087 |
| -0.33700 | -0.34896 |
| -0.34200 | -0.34792 |
| -0.34700 | -0.34937 |

### 8.3.18 CV-18

| Column 1 | Column 2 |
|----------|----------|
| -0.34800 | -0.32360 |
| -0.34300 | -0.31778 |
| -0.33800 | -0.32982 |
| -0.33300 | -0.32338 |
| -0.32800 | -0.32160 |
| -0.32300 | -0.32036 |
| -0.31800 | -0.31768 |
| -0.31300 | -0.31696 |
| -0.30800 | -0.31412 |
| -0.30300 | -0.31314 |
| -0.29800 | -0.31133 |
| -0.29300 | -0.31028 |
| -0.28800 | -0.30772 |
| -0.28300 | -0.30587 |
| -0.27800 | -0.30459 |
| -0.27300 | -0.30272 |
| -0.26800 | -0.30174 |
| -0.26300 | -0.30140 |
| -0.25800 | -0.30096 |
| -0.25300 | -0.29927 |
| -0.24800 | -0.29750 |
| -0.24300 | -0.29480 |
| -0.23800 | -0.29186 |
| -0.23300 | -0.28893 |
| -0.22800 | -0.28499 |
| -0.22300 | -0.27978 |
| -0.21800 | -0.27491 |

| <b>Column 1</b> | <b>Column 2</b> |
|-----------------|-----------------|
| -0.21300        | -0.27017        |
| -0.20800        | -0.26371        |
| -0.20300        | -0.25623        |
| -0.19800        | -0.24841        |
| -0.19300        | -0.23960        |
| -0.18800        | -0.22853        |
| -0.18300        | -0.21576        |
| -0.17800        | -0.20049        |
| -0.17300        | -0.18455        |
| -0.16800        | -0.17045        |
| -0.16300        | -0.15558        |
| -0.15800        | -0.13826        |
| -0.15300        | -0.11856        |
| -0.14800        | -0.098230       |
| -0.14300        | -0.077420       |
| -0.13800        | -0.054050       |
| -0.13300        | -0.027930       |
| -0.12800        | 5.6696E-4       |
| -0.12300        | 0.030160        |
| -0.11800        | 0.057680        |
| -0.11300        | 0.082670        |
| -0.10800        | 0.10719         |
| -0.10300        | 0.12816         |
| -0.098000       | 0.14732         |
| -0.093000       | 0.16922         |
| -0.088000       | 0.18687         |
| -0.083000       | 0.20150         |
| -0.078000       | 0.21914         |
| -0.073000       | 0.23625         |
| -0.068000       | 0.25156         |
| -0.063000       | 0.26389         |
| -0.058000       | 0.27241         |
| -0.053000       | 0.27868         |
| -0.048000       | 0.28524         |
| -0.043000       | 0.29228         |

| <b>Column 1</b> | <b>Column 2</b> |
|-----------------|-----------------|
| -0.038000       | 0.29654         |
| -0.033000       | 0.29874         |
| -0.028000       | 0.29972         |
| -0.023000       | 0.29837         |
| -0.018000       | 0.29566         |
| -0.013000       | 0.29384         |
| -0.0080000      | 0.29270         |
| -0.0030000      | 0.29117         |
| 0.0020000       | 0.29072         |
| 0.0070000       | 0.29135         |
| 0.012000        | 0.29092         |
| 0.017000        | 0.28891         |
| 0.022000        | 0.28669         |
| 0.027000        | 0.28514         |
| 0.032000        | 0.28410         |
| 0.037000        | 0.28341         |
| 0.042000        | 0.27995         |
| 0.047000        | 0.27035         |
| 0.052000        | 0.26805         |
| 0.057000        | 0.27492         |
| 0.062000        | 0.27407         |
| 0.067000        | 0.27228         |
| 0.072000        | 0.27461         |
| 0.077000        | 0.27401         |
| 0.082000        | 0.27254         |
| 0.087000        | 0.27270         |
| 0.092000        | 0.27297         |
| 0.097000        | 0.27262         |
| 0.10200         | 0.27330         |
| 0.10700         | 0.27388         |
| 0.11200         | 0.27367         |
| 0.11700         | 0.27315         |
| 0.12200         | 0.27295         |
| 0.12700         | 0.27214         |
| 0.13200         | 0.27155         |

| <b>Column 1</b> | <b>Column 2</b> |
|-----------------|-----------------|
| 0.13700         | 0.27035         |
| 0.14200         | 0.26928         |
| 0.14700         | 0.26846         |
| 0.15200         | 0.26697         |
| 0.15700         | 0.26649         |
| 0.16200         | 0.26504         |
| 0.16700         | 0.26565         |
| 0.17200         | 0.26508         |
| 0.17700         | 0.26561         |
| 0.18200         | 0.26424         |
| 0.18700         | 0.26394         |
| 0.19200         | 0.26419         |
| 0.19700         | 0.25896         |
| 0.19800         | 0.26839         |
| 0.19300         | 0.26474         |
| 0.18800         | 0.25372         |
| 0.18300         | 0.25962         |
| 0.17800         | 0.26005         |
| 0.17300         | 0.26049         |
| 0.16800         | 0.25937         |
| 0.16300         | 0.25696         |
| 0.15800         | 0.25553         |
| 0.15300         | 0.25306         |
| 0.14800         | 0.25168         |
| 0.14300         | 0.25119         |
| 0.13800         | 0.25225         |
| 0.13300         | 0.25268         |
| 0.12800         | 0.25238         |
| 0.12300         | 0.25251         |
| 0.11800         | 0.25214         |
| 0.11300         | 0.25066         |
| 0.10800         | 0.24905         |
| 0.10300         | 0.24730         |
| 0.098000        | 0.24588         |
| 0.093000        | 0.24595         |

| <b>Column 1</b> | <b>Column 2</b> |
|-----------------|-----------------|
| 0.088000        | 0.24548         |
| 0.083000        | 0.24424         |
| 0.078000        | 0.24302         |
| 0.073000        | 0.24227         |
| 0.068000        | 0.24177         |
| 0.063000        | 0.24094         |
| 0.058000        | 0.23994         |
| 0.053000        | 0.23867         |
| 0.048000        | 0.23713         |
| 0.043000        | 0.23569         |
| 0.038000        | 0.23417         |
| 0.033000        | 0.23255         |
| 0.028000        | 0.23098         |
| 0.023000        | 0.22898         |
| 0.018000        | 0.22660         |
| 0.013000        | 0.22332         |
| 0.0080000       | 0.21940         |
| 0.0030000       | 0.21554         |
| -0.0020000      | 0.21236         |
| -0.0070000      | 0.20944         |
| -0.012000       | 0.20424         |
| -0.017000       | 0.19841         |
| -0.022000       | 0.19445         |
| -0.027000       | 0.19009         |
| -0.032000       | 0.18407         |
| -0.037000       | 0.17705         |
| -0.042000       | 0.16834         |
| -0.047000       | 0.15750         |
| -0.052000       | 0.14489         |
| -0.057000       | 0.13101         |
| -0.062000       | 0.11610         |
| -0.067000       | 0.099960        |
| -0.072000       | 0.081820        |
| -0.077000       | 0.060970        |
| -0.082000       | 0.038640        |

| <b>Column 1</b> | <b>Column 2</b> |
|-----------------|-----------------|
| -0.087000       | 0.014710        |
| -0.092000       | -0.011400       |
| -0.097000       | -0.037720       |
| -0.10200        | -0.064280       |
| -0.10700        | -0.091210       |
| -0.11200        | -0.11712        |
| -0.11700        | -0.14396        |
| -0.12200        | -0.17645        |
| -0.12700        | -0.21268        |
| -0.13200        | -0.24084        |
| -0.13700        | -0.25887        |
| -0.14200        | -0.27509        |
| -0.14700        | -0.28848        |
| -0.15200        | -0.29918        |
| -0.15700        | -0.31304        |
| -0.16200        | -0.32899        |
| -0.16700        | -0.34367        |
| -0.17200        | -0.35594        |
| -0.17700        | -0.36513        |
| -0.18200        | -0.37208        |
| -0.18700        | -0.37732        |
| -0.19200        | -0.38129        |
| -0.19700        | -0.38472        |
| -0.20200        | -0.38567        |
| -0.20700        | -0.38428        |
| -0.21200        | -0.38241        |
| -0.21700        | -0.37643        |
| -0.22200        | -0.36646        |
| -0.22700        | -0.36642        |
| -0.23200        | -0.37906        |
| -0.23700        | -0.38382        |
| -0.24200        | -0.37587        |
| -0.24700        | -0.37243        |
| -0.25200        | -0.37756        |
| -0.25700        | -0.38050        |

| Column 1 | Column 2 |
|----------|----------|
| -0.26200 | -0.37982 |
| -0.26700 | -0.38015 |
| -0.27200 | -0.38065 |
| -0.27700 | -0.38063 |
| -0.28200 | -0.37902 |
| -0.28700 | -0.37825 |
| -0.29200 | -0.37938 |
| -0.29700 | -0.37961 |
| -0.30200 | -0.37900 |
| -0.30700 | -0.37800 |
| -0.31200 | -0.37602 |
| -0.31700 | -0.37295 |
| -0.32200 | -0.36937 |
| -0.32700 | -0.36447 |
| -0.33200 | -0.36082 |
| -0.33700 | -0.35716 |
| -0.34200 | -0.35424 |
| -0.34700 | -0.34816 |

### 8.3.19 CV-19

| Column 1 | Column 2 |
|----------|----------|
| -0.34800 | -0.34091 |
| -0.34300 | -0.34016 |
| -0.33800 | -0.32247 |
| -0.33300 | -0.33573 |
| -0.32800 | -0.35645 |
| -0.32300 | -0.35843 |
| -0.31800 | -0.35570 |
| -0.31300 | -0.35609 |
| -0.30800 | -0.35135 |
| -0.30300 | -0.34653 |
| -0.29800 | -0.34195 |
| -0.29300 | -0.33753 |
| -0.28800 | -0.33416 |
| -0.28300 | -0.33188 |

| <b>Column 1</b> | <b>Column 2</b> |
|-----------------|-----------------|
| -0.27800        | -0.33018        |
| -0.27300        | -0.32730        |
| -0.26800        | -0.32478        |
| -0.26300        | -0.32206        |
| -0.25800        | -0.31925        |
| -0.25300        | -0.31632        |
| -0.24800        | -0.31331        |
| -0.24300        | -0.31022        |
| -0.23800        | -0.30657        |
| -0.23300        | -0.30253        |
| -0.22800        | -0.29778        |
| -0.22300        | -0.29305        |
| -0.21800        | -0.28863        |
| -0.21300        | -0.28307        |
| -0.20800        | -0.27561        |
| -0.20300        | -0.26780        |
| -0.19800        | -0.25938        |
| -0.19300        | -0.25049        |
| -0.18800        | -0.24170        |
| -0.18300        | -0.23191        |
| -0.17800        | -0.22055        |
| -0.17300        | -0.20775        |
| -0.16800        | -0.19364        |
| -0.16300        | -0.17735        |
| -0.15800        | -0.15841        |
| -0.15300        | -0.13721        |
| -0.14800        | -0.11475        |
| -0.14300        | -0.091120       |
| -0.13800        | -0.066430       |
| -0.13300        | -0.040970       |
| -0.12800        | -0.014520       |
| -0.12300        | 0.011980        |
| -0.11800        | 0.038060        |
| -0.11300        | 0.064370        |
| -0.10800        | 0.090480        |



| <b>Column 1</b> | <b>Column 2</b> |
|-----------------|-----------------|
| -0.10300        | 0.11537         |
| -0.098000       | 0.13941         |
| -0.093000       | 0.16262         |
| -0.088000       | 0.18450         |
| -0.083000       | 0.20474         |
| -0.078000       | 0.22295         |
| -0.073000       | 0.23910         |
| -0.068000       | 0.25319         |
| -0.063000       | 0.26543         |
| -0.058000       | 0.27575         |
| -0.053000       | 0.28396         |
| -0.048000       | 0.29090         |
| -0.043000       | 0.29665         |
| -0.038000       | 0.30056         |
| -0.033000       | 0.30409         |
| -0.028000       | 0.30649         |
| -0.023000       | 0.30743         |
| -0.018000       | 0.30857         |
| -0.013000       | 0.30950         |
| -0.0080000      | 0.30977         |
| -0.0030000      | 0.30929         |
| 0.0020000       | 0.30895         |
| 0.0070000       | 0.30867         |
| 0.012000        | 0.30820         |
| 0.017000        | 0.30770         |
| 0.022000        | 0.30672         |
| 0.027000        | 0.30580         |
| 0.032000        | 0.30553         |
| 0.037000        | 0.30502         |
| 0.042000        | 0.30377         |
| 0.047000        | 0.30307         |
| 0.052000        | 0.30270         |
| 0.057000        | 0.30172         |
| 0.062000        | 0.30060         |
| 0.067000        | 0.30009         |

| <b>Column 1</b> | <b>Column 2</b> |
|-----------------|-----------------|
| 0.072000        | 0.29910         |
| 0.077000        | 0.29812         |
| 0.082000        | 0.29790         |
| 0.087000        | 0.29732         |
| 0.092000        | 0.29630         |
| 0.097000        | 0.29587         |
| 0.10200         | 0.29729         |
| 0.10700         | 0.29954         |
| 0.11200         | 0.30398         |
| 0.11700         | 0.30614         |
| 0.12200         | 0.30340         |
| 0.12700         | 0.30477         |
| 0.13200         | 0.30719         |
| 0.13700         | 0.30045         |
| 0.14200         | 0.29124         |
| 0.14700         | 0.28760         |
| 0.15200         | 0.27820         |
| 0.15700         | 0.27555         |
| 0.16200         | 0.29683         |
| 0.16700         | 0.31114         |
| 0.17200         | 0.30562         |
| 0.17700         | 0.29668         |
| 0.18200         | 0.28365         |
| 0.18700         | 0.27648         |
| 0.19200         | 0.28291         |
| 0.19700         | 0.28132         |
| 0.19800         | 0.27620         |
| 0.19300         | 0.27087         |
| 0.18800         | 0.26771         |
| 0.18300         | 0.26775         |
| 0.17800         | 0.26569         |
| 0.17300         | 0.26540         |
| 0.16800         | 0.26410         |
| 0.16300         | 0.26293         |
| 0.15800         | 0.26172         |

| <b>Column 1</b> | <b>Column 2</b> |
|-----------------|-----------------|
| 0.15300         | 0.26222         |
| 0.14800         | 0.26113         |
| 0.14300         | 0.25996         |
| 0.13800         | 0.25915         |
| 0.13300         | 0.25830         |
| 0.12800         | 0.25772         |
| 0.12300         | 0.25665         |
| 0.11800         | 0.25570         |
| 0.11300         | 0.25508         |
| 0.10800         | 0.25465         |
| 0.10300         | 0.25389         |
| 0.098000        | 0.25315         |
| 0.093000        | 0.25239         |
| 0.088000        | 0.25191         |
| 0.083000        | 0.25072         |
| 0.078000        | 0.24976         |
| 0.073000        | 0.25014         |
| 0.068000        | 0.24967         |
| 0.063000        | 0.24899         |
| 0.058000        | 0.24891         |
| 0.053000        | 0.24779         |
| 0.048000        | 0.24643         |
| 0.043000        | 0.24597         |
| 0.038000        | 0.24490         |
| 0.033000        | 0.24327         |
| 0.028000        | 0.24143         |
| 0.023000        | 0.23915         |
| 0.018000        | 0.23749         |
| 0.013000        | 0.23640         |
| 0.0080000       | 0.23463         |
| 0.0030000       | 0.23189         |
| -0.0020000      | 0.22856         |
| -0.0070000      | 0.22521         |
| -0.012000       | 0.22141         |
| -0.017000       | 0.21596         |

| <b>Column 1</b> | <b>Column 2</b> |
|-----------------|-----------------|
| -0.022000       | 0.21044         |
| -0.027000       | 0.20469         |
| -0.032000       | 0.19713         |
| -0.037000       | 0.18880         |
| -0.042000       | 0.17913         |
| -0.047000       | 0.16752         |
| -0.052000       | 0.15443         |
| -0.057000       | 0.13972         |
| -0.062000       | 0.12356         |
| -0.067000       | 0.10548         |
| -0.072000       | 0.085430        |
| -0.077000       | 0.063820        |
| -0.082000       | 0.040830        |
| -0.087000       | 0.016670        |
| -0.092000       | -0.011320       |
| -0.097000       | -0.041130       |
| -0.10200        | -0.068140       |
| -0.10700        | -0.096460       |
| -0.11200        | -0.12766        |
| -0.11700        | -0.15715        |
| -0.12200        | -0.18396        |
| -0.12700        | -0.21047        |
| -0.13200        | -0.23634        |
| -0.13700        | -0.26029        |
| -0.14200        | -0.28285        |
| -0.14700        | -0.30312        |
| -0.15200        | -0.32121        |
| -0.15700        | -0.33828        |
| -0.16200        | -0.35309        |
| -0.16700        | -0.36463        |
| -0.17200        | -0.37457        |
| -0.17700        | -0.38285        |
| -0.18200        | -0.38883        |
| -0.18700        | -0.39370        |
| -0.19200        | -0.39889        |

| <b>Column 1</b> | <b>Column 2</b> |
|-----------------|-----------------|
| -0.19700        | -0.40396        |
| -0.20200        | -0.40712        |
| -0.20700        | -0.41007        |
| -0.21200        | -0.41272        |
| -0.21700        | -0.41348        |
| -0.22200        | -0.41374        |
| -0.22700        | -0.41372        |
| -0.23200        | -0.41218        |
| -0.23700        | -0.40948        |
| -0.24200        | -0.40653        |
| -0.24700        | -0.40391        |
| -0.25200        | -0.40216        |
| -0.25700        | -0.40245        |
| -0.26200        | -0.40348        |
| -0.26700        | -0.40144        |
| -0.27200        | -0.39876        |
| -0.27700        | -0.39711        |
| -0.28200        | -0.39587        |
| -0.28700        | -0.39454        |
| -0.29200        | -0.39277        |
| -0.29700        | -0.39102        |
| -0.30200        | -0.39036        |
| -0.30700        | -0.39089        |
| -0.31200        | -0.38942        |
| -0.31700        | -0.38983        |
| -0.32200        | -0.39096        |
| -0.32700        | -0.39294        |
| -0.33200        | -0.39337        |
| -0.33700        | -0.39361        |
| -0.34200        | -0.39095        |
| -0.34700        | -0.37024        |

### 8.3.20 CV-20

| <b>Column 1</b> | <b>Column 2</b> |
|-----------------|-----------------|
| -0.34800        | -0.36435        |

| <b>Column 1</b> | <b>Column 2</b> |
|-----------------|-----------------|
| -0.34300        | -0.36392        |
| -0.33800        | -0.34948        |
| -0.33300        | -0.36074        |
| -0.32800        | -0.36227        |
| -0.32300        | -0.36083        |
| -0.31800        | -0.35717        |
| -0.31300        | -0.35200        |
| -0.30800        | -0.34868        |
| -0.30300        | -0.34467        |
| -0.29800        | -0.34286        |
| -0.29300        | -0.33968        |
| -0.28800        | -0.33810        |
| -0.28300        | -0.33732        |
| -0.27800        | -0.33668        |
| -0.27300        | -0.33538        |
| -0.26800        | -0.33338        |
| -0.26300        | -0.33148        |
| -0.25800        | -0.32943        |
| -0.25300        | -0.32772        |
| -0.24800        | -0.32513        |
| -0.24300        | -0.32225        |
| -0.23800        | -0.32242        |
| -0.23300        | -0.33554        |
| -0.22800        | -0.35729        |
| -0.22300        | -0.36706        |
| -0.21800        | -0.35957        |
| -0.21300        | -0.33802        |
| -0.20800        | -0.30857        |
| -0.20300        | -0.28632        |
| -0.19800        | -0.27257        |
| -0.19300        | -0.25932        |
| -0.18800        | -0.24706        |
| -0.18300        | -0.23554        |
| -0.17800        | -0.22180        |
| -0.17300        | -0.20609        |

| <b>Column 1</b> | <b>Column 2</b> |
|-----------------|-----------------|
| -0.16800        | -0.19000        |
| -0.16300        | -0.17338        |
| -0.15800        | -0.15454        |
| -0.15300        | -0.13476        |
| -0.14800        | -0.11303        |
| -0.14300        | -0.089030       |
| -0.13800        | -0.064390       |
| -0.13300        | -0.036370       |
| -0.12800        | -0.010230       |
| -0.12300        | 0.038430        |
| -0.11800        | 0.10352         |
| -0.11300        | 0.11226         |
| -0.10800        | 0.093090        |
| -0.10300        | 0.12161         |
| -0.098000       | 0.17305         |
| -0.093000       | 0.20329         |
| -0.088000       | 0.22023         |
| -0.083000       | 0.24193         |
| -0.078000       | 0.26172         |
| -0.073000       | 0.27554         |
| -0.068000       | 0.28760         |
| -0.063000       | 0.29799         |
| -0.058000       | 0.30629         |
| -0.053000       | 0.31171         |
| -0.048000       | 0.31518         |
| -0.043000       | 0.31794         |
| -0.038000       | 0.32096         |
| -0.033000       | 0.32422         |
| -0.028000       | 0.32702         |
| -0.023000       | 0.32779         |
| -0.018000       | 0.32719         |
| -0.013000       | 0.32759         |
| -0.0080000      | 0.32744         |
| -0.0030000      | 0.32615         |
| 0.0020000       | 0.32589         |

| <b>Column 1</b> | <b>Column 2</b> |
|-----------------|-----------------|
| 0.0070000       | 0.32611         |
| 0.012000        | 0.32638         |
| 0.017000        | 0.32711         |
| 0.022000        | 0.32735         |
| 0.027000        | 0.32656         |
| 0.032000        | 0.32667         |
| 0.037000        | 0.32771         |
| 0.042000        | 0.32613         |
| 0.047000        | 0.32513         |
| 0.052000        | 0.32690         |
| 0.057000        | 0.32567         |
| 0.062000        | 0.31800         |
| 0.067000        | 0.31122         |
| 0.072000        | 0.31281         |
| 0.077000        | 0.31774         |
| 0.082000        | 0.31327         |
| 0.087000        | 0.29641         |
| 0.092000        | 0.27434         |
| 0.097000        | 0.25849         |
| 0.10200         | 0.26316         |
| 0.10700         | 0.23940         |
| 0.11200         | 0.18746         |
| 0.11700         | 0.19850         |
| 0.12200         | 0.23252         |
| 0.12700         | 0.23510         |
| 0.13200         | 0.24503         |
| 0.13700         | 0.26500         |
| 0.14200         | 0.28345         |
| 0.14700         | 0.30103         |
| 0.15200         | 0.31290         |
| 0.15700         | 0.31621         |
| 0.16200         | 0.31460         |
| 0.16700         | 0.31172         |
| 0.17200         | 0.30914         |
| 0.17700         | 0.30434         |



| <b>Column 1</b> | <b>Column 2</b> |
|-----------------|-----------------|
| 0.18200         | 0.30088         |
| 0.18700         | 0.29653         |
| 0.19200         | 0.29702         |
| 0.19700         | 0.29777         |
| 0.19800         | 0.28298         |
| 0.19300         | 0.28033         |
| 0.18800         | 0.28268         |
| 0.18300         | 0.28173         |
| 0.17800         | 0.28164         |
| 0.17300         | 0.28087         |
| 0.16800         | 0.27733         |
| 0.16300         | 0.27656         |
| 0.15800         | 0.27467         |
| 0.15300         | 0.27039         |
| 0.14800         | 0.26247         |
| 0.14300         | 0.25593         |
| 0.13800         | 0.25027         |
| 0.13300         | 0.24372         |
| 0.12800         | 0.23602         |
| 0.12300         | 0.22868         |
| 0.11800         | 0.22350         |
| 0.11300         | 0.22291         |
| 0.10800         | 0.22491         |
| 0.10300         | 0.22535         |
| 0.098000        | 0.22583         |
| 0.093000        | 0.22415         |
| 0.088000        | 0.22056         |
| 0.083000        | 0.20532         |
| 0.078000        | 0.18530         |
| 0.073000        | 0.17858         |
| 0.068000        | 0.17830         |
| 0.063000        | 0.18521         |
| 0.058000        | 0.21056         |
| 0.053000        | 0.26907         |
| 0.048000        | 0.35439         |

| <b>Column 1</b> | <b>Column 2</b> |
|-----------------|-----------------|
| 0.043000        | 0.42352         |
| 0.038000        | 0.43768         |
| 0.033000        | 0.40702         |
| 0.028000        | 0.36600         |
| 0.023000        | 0.32492         |
| 0.018000        | 0.29110         |
| 0.013000        | 0.26570         |
| 0.0080000       | 0.25065         |
| 0.0030000       | 0.25076         |
| -0.0020000      | 0.25276         |
| -0.0070000      | 0.25193         |
| -0.012000       | 0.24690         |
| -0.017000       | 0.23266         |
| -0.022000       | 0.20989         |
| -0.027000       | 0.18611         |
| -0.032000       | 0.17008         |
| -0.037000       | 0.15992         |
| -0.042000       | 0.14921         |
| -0.047000       | 0.13671         |
| -0.052000       | 0.12940         |
| -0.057000       | 0.12090         |
| -0.062000       | 0.094820        |
| -0.067000       | 0.059010        |
| -0.072000       | 0.025340        |
| -0.077000       | -0.0086000      |
| -0.082000       | -0.036130       |
| -0.087000       | -0.054060       |
| -0.092000       | -0.072390       |
| -0.097000       | -0.093160       |
| -0.10200        | -0.11893        |
| -0.10700        | -0.14775        |
| -0.11200        | -0.17133        |
| -0.11700        | -0.19803        |
| -0.12200        | -0.22686        |
| -0.12700        | -0.25026        |

| <b>Column 1</b> | <b>Column 2</b> |
|-----------------|-----------------|
| -0.13200        | -0.27421        |
| -0.13700        | -0.30126        |
| -0.14200        | -0.32546        |
| -0.14700        | -0.33574        |
| -0.15200        | -0.34162        |
| -0.15700        | -0.35125        |
| -0.16200        | -0.34975        |
| -0.16700        | -0.34217        |
| -0.17200        | -0.35659        |
| -0.17700        | -0.39593        |
| -0.18200        | -0.42504        |
| -0.18700        | -0.43472        |
| -0.19200        | -0.44175        |
| -0.19700        | -0.44728        |
| -0.20200        | -0.45022        |
| -0.20700        | -0.45122        |
| -0.21200        | -0.45037        |
| -0.21700        | -0.44398        |
| -0.22200        | -0.43130        |
| -0.22700        | -0.41791        |
| -0.23200        | -0.40622        |
| -0.23700        | -0.39623        |
| -0.24200        | -0.38768        |
| -0.24700        | -0.38355        |
| -0.25200        | -0.38479        |
| -0.25700        | -0.38657        |
| -0.26200        | -0.38553        |
| -0.26700        | -0.38645        |
| -0.27200        | -0.38721        |
| -0.27700        | -0.37817        |
| -0.28200        | -0.36390        |
| -0.28700        | -0.35014        |
| -0.29200        | -0.33288        |
| -0.29700        | -0.30245        |
| -0.30200        | -0.28926        |

| Column 1 | Column 2 |
|----------|----------|
| -0.30700 | -0.32795 |
| -0.31200 | -0.37771 |
| -0.31700 | -0.40370 |
| -0.32200 | -0.40530 |
| -0.32700 | -0.40304 |
| -0.33200 | -0.42122 |
| -0.33700 | -0.45254 |
| -0.34200 | -0.46729 |
| -0.34700 | -0.43938 |

### 8.3.21 CV-21

| Column 1 | Column 2 |
|----------|----------|
| -0.34800 | -0.41123 |
| -0.34300 | -0.30041 |
| -0.33800 | -0.24819 |
| -0.33300 | -0.26631 |
| -0.32800 | -0.30377 |
| -0.32300 | -0.31748 |
| -0.31800 | -0.31391 |
| -0.31300 | -0.30754 |
| -0.30800 | -0.32544 |
| -0.30300 | -0.35803 |
| -0.29800 | -0.37171 |
| -0.29300 | -0.35489 |
| -0.28800 | -0.33692 |
| -0.28300 | -0.33729 |
| -0.27800 | -0.34201 |
| -0.27300 | -0.33997 |
| -0.26800 | -0.33733 |
| -0.26300 | -0.33629 |
| -0.25800 | -0.33565 |
| -0.25300 | -0.33973 |
| -0.24800 | -0.34510 |
| -0.24300 | -0.34646 |
| -0.23800 | -0.34688 |

| <b>Column 1</b> | <b>Column 2</b> |
|-----------------|-----------------|
| -0.23300        | -0.35072        |
| -0.22800        | -0.35344        |
| -0.22300        | -0.34985        |
| -0.21800        | -0.34312        |
| -0.21300        | -0.34081        |
| -0.20800        | -0.34227        |
| -0.20300        | -0.34263        |
| -0.19800        | -0.33854        |
| -0.19300        | -0.32373        |
| -0.18800        | -0.30304        |
| -0.18300        | -0.28735        |
| -0.17800        | -0.27558        |
| -0.17300        | -0.25989        |
| -0.16800        | -0.24223        |
| -0.16300        | -0.22312        |
| -0.15800        | -0.19602        |
| -0.15300        | -0.16327        |
| -0.14800        | -0.13408        |
| -0.14300        | -0.11888        |
| -0.13800        | -0.11238        |
| -0.13300        | -0.099050       |
| -0.12800        | -0.078700       |
| -0.12300        | -0.058510       |
| -0.11800        | -0.036170       |
| -0.11300        | -0.0069800      |
| -0.10800        | 0.023020        |
| -0.10300        | 0.038770        |
| -0.098000       | 0.036970        |
| -0.093000       | 0.035250        |
| -0.088000       | 0.036230        |
| -0.083000       | 0.029240        |
| -0.078000       | 0.022150        |
| -0.073000       | 0.035020        |
| -0.068000       | 0.083050        |
| -0.063000       | 0.16589         |

| <b>Column 1</b> | <b>Column 2</b> |
|-----------------|-----------------|
| -0.058000       | 0.27054         |
| -0.053000       | 0.37502         |
| -0.048000       | 0.46542         |
| -0.043000       | 0.53886         |
| -0.038000       | 0.59138         |
| -0.033000       | 0.61886         |
| -0.028000       | 0.61484         |
| -0.023000       | 0.59004         |
| -0.018000       | 0.57297         |
| -0.013000       | 0.56888         |
| -0.0080000      | 0.55558         |
| -0.0030000      | 0.52347         |
| 0.0020000       | 0.47769         |
| 0.0070000       | 0.42593         |
| 0.012000        | 0.38724         |
| 0.017000        | 0.37142         |
| 0.022000        | 0.37021         |
| 0.027000        | 0.38135         |
| 0.032000        | 0.40508         |
| 0.037000        | 0.42629         |
| 0.042000        | 0.43240         |
| 0.047000        | 0.43049         |
| 0.052000        | 0.42060         |
| 0.057000        | 0.39631         |
| 0.062000        | 0.37241         |
| 0.067000        | 0.36453         |
| 0.072000        | 0.36372         |
| 0.077000        | 0.35828         |
| 0.082000        | 0.35101         |
| 0.087000        | 0.34069         |
| 0.092000        | 0.32775         |
| 0.097000        | 0.31866         |
| 0.10200         | 0.31238         |
| 0.10700         | 0.30526         |
| 0.11200         | 0.29541         |

| <b>Column 1</b> | <b>Column 2</b> |
|-----------------|-----------------|
| 0.11700         | 0.28718         |
| 0.12200         | 0.28202         |
| 0.12700         | 0.28070         |
| 0.13200         | 0.27939         |
| 0.13700         | 0.27525         |
| 0.14200         | 0.27459         |
| 0.14700         | 0.27116         |
| 0.15200         | 0.27388         |
| 0.15700         | 0.29683         |
| 0.16200         | 0.31900         |
| 0.16700         | 0.32659         |
| 0.17200         | 0.32504         |
| 0.17700         | 0.31922         |
| 0.18200         | 0.32290         |
| 0.18700         | 0.32380         |
| 0.19200         | 0.32243         |
| 0.19700         | 0.32272         |
| 0.19800         | 0.30336         |
| 0.19300         | 0.28586         |
| 0.18800         | 0.30141         |
| 0.18300         | 0.28866         |
| 0.17800         | 0.28133         |
| 0.17300         | 0.27359         |
| 0.16800         | 0.26432         |
| 0.16300         | 0.25857         |
| 0.15800         | 0.25766         |
| 0.15300         | 0.26477         |
| 0.14800         | 0.27528         |
| 0.14300         | 0.29103         |
| 0.13800         | 0.30344         |
| 0.13300         | 0.30819         |
| 0.12800         | 0.30673         |
| 0.12300         | 0.30518         |
| 0.11800         | 0.30603         |
| 0.11300         | 0.30630         |

| <b>Column 1</b> | <b>Column 2</b> |
|-----------------|-----------------|
| 0.10800         | 0.30570         |
| 0.10300         | 0.30570         |
| 0.098000        | 0.30721         |
| 0.093000        | 0.30803         |
| 0.088000        | 0.30889         |
| 0.083000        | 0.30854         |
| 0.078000        | 0.30769         |
| 0.073000        | 0.31080         |
| 0.068000        | 0.31690         |
| 0.063000        | 0.32308         |
| 0.058000        | 0.33281         |
| 0.053000        | 0.34156         |
| 0.048000        | 0.34210         |
| 0.043000        | 0.33619         |
| 0.038000        | 0.32537         |
| 0.033000        | 0.31385         |
| 0.028000        | 0.30576         |
| 0.023000        | 0.30748         |
| 0.018000        | 0.31269         |
| 0.013000        | 0.30925         |
| 0.0080000       | 0.30263         |
| 0.0030000       | 0.29404         |
| -0.0020000      | 0.28243         |
| -0.0070000      | 0.27144         |
| -0.012000       | 0.25956         |
| -0.017000       | 0.24721         |
| -0.022000       | 0.23597         |
| -0.027000       | 0.22606         |
| -0.032000       | 0.21657         |
| -0.037000       | 0.20344         |
| -0.042000       | 0.18631         |
| -0.047000       | 0.16834         |
| -0.052000       | 0.15053         |
| -0.057000       | 0.13250         |
| -0.062000       | 0.11390         |



| <b>Column 1</b> | <b>Column 2</b> |
|-----------------|-----------------|
| -0.067000       | 0.095030        |
| -0.072000       | 0.075780        |
| -0.077000       | 0.054610        |
| -0.082000       | 0.030990        |
| -0.087000       | 0.0055200       |
| -0.092000       | -0.023490       |
| -0.097000       | -0.056350       |
| -0.10200        | -0.090100       |
| -0.10700        | -0.12402        |
| -0.11200        | -0.15829        |
| -0.11700        | -0.19045        |
| -0.12200        | -0.22081        |
| -0.12700        | -0.25054        |
| -0.13200        | -0.28231        |
| -0.13700        | -0.31330        |
| -0.14200        | -0.34383        |
| -0.14700        | -0.40659        |
| -0.15200        | -0.49354        |
| -0.15700        | -0.55075        |
| -0.16200        | -0.57402        |
| -0.16700        | -0.57485        |
| -0.17200        | -0.56089        |
| -0.17700        | -0.55259        |
| -0.18200        | -0.55073        |
| -0.18700        | -0.53699        |
| -0.19200        | -0.51253        |
| -0.19700        | -0.49920        |
| -0.20200        | -0.49299        |
| -0.20700        | -0.48246        |
| -0.21200        | -0.47929        |
| -0.21700        | -0.48395        |
| -0.22200        | -0.48614        |
| -0.22700        | -0.48549        |
| -0.23200        | -0.48173        |
| -0.23700        | -0.47684        |

| <b>Column 1</b> | <b>Column 2</b> |
|-----------------|-----------------|
| -0.24200        | -0.47305        |
| -0.24700        | -0.47078        |
| -0.25200        | -0.47080        |
| -0.25700        | -0.47146        |
| -0.26200        | -0.47213        |
| -0.26700        | -0.47166        |
| -0.27200        | -0.47051        |
| -0.27700        | -0.46822        |
| -0.28200        | -0.46553        |
| -0.28700        | -0.46247        |
| -0.29200        | -0.45952        |
| -0.29700        | -0.45643        |
| -0.30200        | -0.45410        |
| -0.30700        | -0.45246        |
| -0.31200        | -0.45011        |
| -0.31700        | -0.45111        |
| -0.32200        | -0.45022        |
| -0.32700        | -0.45003        |
| -0.33200        | -0.44837        |
| -0.33700        | -0.44943        |
| -0.34200        | -0.45123        |
| -0.34700        | -0.45097        |

### 8.3.22 CV-24

| <b>Column 1</b> | <b>Column 2</b> |
|-----------------|-----------------|
| -0.34800        | -0.49796        |
| -0.34300        | -0.48804        |
| -0.33800        | -0.47528        |
| -0.33300        | -0.47388        |
| -0.32800        | -0.47038        |
| -0.32300        | -0.46696        |
| -0.31800        | -0.46427        |
| -0.31300        | -0.46094        |
| -0.30800        | -0.45906        |
| -0.30300        | -0.45701        |

| <b>Column 1</b> | <b>Column 2</b> |
|-----------------|-----------------|
| -0.29800        | -0.45586        |
| -0.29300        | -0.45309        |
| -0.28800        | -0.44991        |
| -0.28300        | -0.44694        |
| -0.27800        | -0.44439        |
| -0.27300        | -0.44135        |
| -0.26800        | -0.43803        |
| -0.26300        | -0.43537        |
| -0.25800        | -0.43235        |
| -0.25300        | -0.42825        |
| -0.24800        | -0.42362        |
| -0.24300        | -0.41999        |
| -0.23800        | -0.41664        |
| -0.23300        | -0.41279        |
| -0.22800        | -0.40753        |
| -0.22300        | -0.40239        |
| -0.21800        | -0.39753        |
| -0.21300        | -0.39070        |
| -0.20800        | -0.38230        |
| -0.20300        | -0.37386        |
| -0.19800        | -0.36527        |
| -0.19300        | -0.35496        |
| -0.18800        | -0.34355        |
| -0.18300        | -0.33121        |
| -0.17800        | -0.31714        |
| -0.17300        | -0.30132        |
| -0.16800        | -0.28278        |
| -0.16300        | -0.26152        |
| -0.15800        | -0.23899        |
| -0.15300        | -0.21522        |
| -0.14800        | -0.18960        |
| -0.14300        | -0.16166        |
| -0.13800        | -0.13195        |
| -0.13300        | -0.10030        |
| -0.12800        | -0.065780       |

| <b>Column 1</b> | <b>Column 2</b> |
|-----------------|-----------------|
| -0.12300        | -0.030590       |
| -0.11800        | 0.0047700       |
| -0.11300        | 0.041650        |
| -0.10800        | 0.079220        |
| -0.10300        | 0.11624         |
| -0.098000       | 0.15258         |
| -0.093000       | 0.18833         |
| -0.088000       | 0.22230         |
| -0.083000       | 0.25366         |
| -0.078000       | 0.28265         |
| -0.073000       | 0.30910         |
| -0.068000       | 0.33285         |
| -0.063000       | 0.35412         |
| -0.058000       | 0.37226         |
| -0.053000       | 0.38745         |
| -0.048000       | 0.40063         |
| -0.043000       | 0.41128         |
| -0.038000       | 0.41944         |
| -0.033000       | 0.42629         |
| -0.028000       | 0.43160         |
| -0.023000       | 0.43505         |
| -0.018000       | 0.43821         |
| -0.013000       | 0.44090         |
| -0.0080000      | 0.44215         |
| -0.0030000      | 0.44286         |
| 0.0020000       | 0.44299         |
| 0.0070000       | 0.44203         |
| 0.012000        | 0.44080         |
| 0.017000        | 0.43924         |
| 0.022000        | 0.43742         |
| 0.027000        | 0.43598         |
| 0.032000        | 0.43461         |
| 0.037000        | 0.43343         |
| 0.042000        | 0.43211         |
| 0.047000        | 0.43120         |

| <b>Column 1</b> | <b>Column 2</b> |
|-----------------|-----------------|
| 0.052000        | 0.43061         |
| 0.057000        | 0.42963         |
| 0.062000        | 0.42856         |
| 0.067000        | 0.42792         |
| 0.072000        | 0.42732         |
| 0.077000        | 0.42679         |
| 0.082000        | 0.42641         |
| 0.087000        | 0.42467         |
| 0.092000        | 0.42364         |
| 0.097000        | 0.41643         |
| 0.10200         | 0.40786         |
| 0.10700         | 0.41175         |
| 0.11200         | 0.41429         |
| 0.11700         | 0.41154         |
| 0.12200         | 0.41155         |
| 0.12700         | 0.41184         |
| 0.13200         | 0.41129         |
| 0.13700         | 0.41039         |
| 0.14200         | 0.40898         |
| 0.14700         | 0.40793         |
| 0.15200         | 0.40738         |
| 0.15700         | 0.40643         |
| 0.16200         | 0.40590         |
| 0.16700         | 0.40507         |
| 0.17200         | 0.40560         |
| 0.17700         | 0.40561         |
| 0.18200         | 0.40664         |
| 0.18700         | 0.40702         |
| 0.19200         | 0.40761         |
| 0.19700         | 0.40774         |
| 0.19800         | 0.38992         |
| 0.19300         | 0.38835         |
| 0.18800         | 0.38652         |
| 0.18300         | 0.38378         |
| 0.17800         | 0.38166         |

| <b>Column 1</b> | <b>Column 2</b> |
|-----------------|-----------------|
| 0.17300         | 0.38005         |
| 0.16800         | 0.37758         |
| 0.16300         | 0.37600         |
| 0.15800         | 0.37489         |
| 0.15300         | 0.37439         |
| 0.14800         | 0.37296         |
| 0.14300         | 0.37172         |
| 0.13800         | 0.37033         |
| 0.13300         | 0.36874         |
| 0.12800         | 0.36723         |
| 0.12300         | 0.36557         |
| 0.11800         | 0.36404         |
| 0.11300         | 0.36305         |
| 0.10800         | 0.36251         |
| 0.10300         | 0.36114         |
| 0.098000        | 0.35996         |
| 0.093000        | 0.35911         |
| 0.088000        | 0.35797         |
| 0.083000        | 0.35692         |
| 0.078000        | 0.35594         |
| 0.073000        | 0.35537         |
| 0.068000        | 0.35480         |
| 0.063000        | 0.35389         |
| 0.058000        | 0.35300         |
| 0.053000        | 0.35164         |
| 0.048000        | 0.34982         |
| 0.043000        | 0.34811         |
| 0.038000        | 0.34648         |
| 0.033000        | 0.34467         |
| 0.028000        | 0.34321         |
| 0.023000        | 0.34260         |
| 0.018000        | 0.34164         |
| 0.013000        | 0.33902         |
| 0.0080000       | 0.33505         |
| 0.0030000       | 0.32978         |

| <b>Column 1</b> | <b>Column 2</b> |
|-----------------|-----------------|
| -0.0020000      | 0.32180         |
| -0.0070000      | 0.31371         |
| -0.012000       | 0.30599         |
| -0.017000       | 0.29506         |
| -0.022000       | 0.28398         |
| -0.027000       | 0.27383         |
| -0.032000       | 0.26187         |
| -0.037000       | 0.24796         |
| -0.042000       | 0.23177         |
| -0.047000       | 0.21314         |
| -0.052000       | 0.19144         |
| -0.057000       | 0.16557         |
| -0.062000       | 0.13552         |
| -0.067000       | 0.10320         |
| -0.072000       | 0.069370        |
| -0.077000       | 0.033390        |
| -0.082000       | -0.0042000      |
| -0.087000       | -0.043370       |
| -0.092000       | -0.084130       |
| -0.097000       | -0.12591        |
| -0.10200        | -0.16789        |
| -0.10700        | -0.20950        |
| -0.11200        | -0.25079        |
| -0.11700        | -0.29087        |
| -0.12200        | -0.32907        |
| -0.12700        | -0.36534        |
| -0.13200        | -0.39911        |
| -0.13700        | -0.43049        |
| -0.14200        | -0.45905        |
| -0.14700        | -0.48413        |
| -0.15200        | -0.50621        |
| -0.15700        | -0.52575        |
| -0.16200        | -0.54250        |
| -0.16700        | -0.55576        |
| -0.17200        | -0.56686        |

| <b>Column 1</b> | <b>Column 2</b> |
|-----------------|-----------------|
| -0.17700        | -0.57610        |
| -0.18200        | -0.58290        |
| -0.18700        | -0.58814        |
| -0.19200        | -0.59152        |
| -0.19700        | -0.59363        |
| -0.20200        | -0.59516        |
| -0.20700        | -0.59557        |
| -0.21200        | -0.59522        |
| -0.21700        | -0.59418        |
| -0.22200        | -0.59230        |
| -0.22700        | -0.59053        |
| -0.23200        | -0.58830        |
| -0.23700        | -0.58578        |
| -0.24200        | -0.58320        |
| -0.24700        | -0.58001        |
| -0.25200        | -0.57725        |
| -0.25700        | -0.57448        |
| -0.26200        | -0.57123        |
| -0.26700        | -0.56820        |
| -0.27200        | -0.56580        |
| -0.27700        | -0.56337        |
| -0.28200        | -0.56074        |
| -0.28700        | -0.55816        |
| -0.29200        | -0.55569        |
| -0.29700        | -0.55312        |
| -0.30200        | -0.55123        |
| -0.30700        | -0.54935        |
| -0.31200        | -0.54611        |
| -0.31700        | -0.54411        |
| -0.32200        | -0.54156        |
| -0.32700        | -0.53949        |
| -0.33200        | -0.53744        |
| -0.33700        | -0.53558        |
| -0.34200        | -0.53434        |
| -0.34700        | -0.52927        |



### 8.3.23 CV-27

| Column 1 | Column 2 |
|----------|----------|
| -0.34800 | -0.61272 |
| -0.34300 | -0.59971 |
| -0.33800 | -0.58210 |
| -0.33300 | -0.58033 |
| -0.32800 | -0.57558 |
| -0.32300 | -0.57288 |
| -0.31800 | -0.57144 |
| -0.31300 | -0.56813 |
| -0.30800 | -0.56588 |
| -0.30300 | -0.56326 |
| -0.29800 | -0.56164 |
| -0.29300 | -0.55817 |
| -0.28800 | -0.55527 |
| -0.28300 | -0.55198 |
| -0.27800 | -0.54820 |
| -0.27300 | -0.54423 |
| -0.26800 | -0.53986 |
| -0.26300 | -0.53571 |
| -0.25800 | -0.53090 |
| -0.25300 | -0.52608 |
| -0.24800 | -0.52103 |
| -0.24300 | -0.51548 |
| -0.23800 | -0.50941 |
| -0.23300 | -0.50293 |
| -0.22800 | -0.49594 |
| -0.22300 | -0.48911 |
| -0.21800 | -0.48133 |
| -0.21300 | -0.47209 |
| -0.20800 | -0.46248 |
| -0.20300 | -0.45203 |
| -0.19800 | -0.43947 |
| -0.19300 | -0.42528 |
| -0.18800 | -0.41091 |
| -0.18300 | -0.39479 |

| <b>Column 1</b> | <b>Column 2</b> |
|-----------------|-----------------|
| -0.17800        | -0.37643        |
| -0.17300        | -0.35630        |
| -0.16800        | -0.33392        |
| -0.16300        | -0.30921        |
| -0.15800        | -0.28245        |
| -0.15300        | -0.25307        |
| -0.14800        | -0.22054        |
| -0.14300        | -0.18582        |
| -0.13800        | -0.14861        |
| -0.13300        | -0.10859        |
| -0.12800        | -0.066650       |
| -0.12300        | -0.023160       |
| -0.11800        | 0.022410        |
| -0.11300        | 0.069280        |
| -0.10800        | 0.11630         |
| -0.10300        | 0.16345         |
| -0.098000       | 0.21001         |
| -0.093000       | 0.25521         |
| -0.088000       | 0.29899         |
| -0.083000       | 0.34086         |
| -0.078000       | 0.37969         |
| -0.073000       | 0.41558         |
| -0.068000       | 0.44863         |
| -0.063000       | 0.47767         |
| -0.058000       | 0.50277         |
| -0.053000       | 0.52498         |
| -0.048000       | 0.54354         |
| -0.043000       | 0.55788         |
| -0.038000       | 0.56943         |
| -0.033000       | 0.57860         |
| -0.028000       | 0.58575         |
| -0.023000       | 0.59140         |
| -0.018000       | 0.59532         |
| -0.013000       | 0.59751         |
| -0.0080000      | 0.59888         |

| <b>Column 1</b> | <b>Column 2</b> |
|-----------------|-----------------|
| -0.0030000      | 0.60061         |
| 0.0020000       | 0.60127         |
| 0.0070000       | 0.60026         |
| 0.012000        | 0.59940         |
| 0.017000        | 0.59830         |
| 0.022000        | 0.59632         |
| 0.027000        | 0.59467         |
| 0.032000        | 0.59292         |
| 0.037000        | 0.59028         |
| 0.042000        | 0.58743         |
| 0.047000        | 0.58526         |
| 0.052000        | 0.58320         |
| 0.057000        | 0.58024         |
| 0.062000        | 0.57749         |
| 0.067000        | 0.57522         |
| 0.072000        | 0.57303         |
| 0.077000        | 0.57043         |
| 0.082000        | 0.56763         |
| 0.087000        | 0.56493         |
| 0.092000        | 0.56252         |
| 0.097000        | 0.56074         |
| 0.10200         | 0.55851         |
| 0.10700         | 0.55584         |
| 0.11200         | 0.55370         |
| 0.11700         | 0.55074         |
| 0.12200         | 0.54753         |
| 0.12700         | 0.54663         |
| 0.13200         | 0.54516         |
| 0.13700         | 0.54347         |
| 0.14200         | 0.54198         |
| 0.14700         | 0.54018         |
| 0.15200         | 0.53853         |
| 0.15700         | 0.53660         |
| 0.16200         | 0.53527         |
| 0.16700         | 0.53303         |

| <b>Column 1</b> | <b>Column 2</b> |
|-----------------|-----------------|
| 0.17200         | 0.53224         |
| 0.17700         | 0.53014         |
| 0.18200         | 0.52876         |
| 0.18700         | 0.52622         |
| 0.19200         | 0.52473         |
| 0.19700         | 0.52399         |
| 0.19800         | 0.50419         |
| 0.19300         | 0.50750         |
| 0.18800         | 0.50247         |
| 0.18300         | 0.49941         |
| 0.17800         | 0.49600         |
| 0.17300         | 0.49434         |
| 0.16800         | 0.49197         |
| 0.16300         | 0.49040         |
| 0.15800         | 0.48845         |
| 0.15300         | 0.48640         |
| 0.14800         | 0.48454         |
| 0.14300         | 0.48243         |
| 0.13800         | 0.47990         |
| 0.13300         | 0.47755         |
| 0.12800         | 0.47568         |
| 0.12300         | 0.47381         |
| 0.11800         | 0.47172         |
| 0.11300         | 0.47002         |
| 0.10800         | 0.46839         |
| 0.10300         | 0.46600         |
| 0.098000        | 0.46442         |
| 0.093000        | 0.46307         |
| 0.088000        | 0.46076         |
| 0.083000        | 0.45857         |
| 0.078000        | 0.45687         |
| 0.073000        | 0.45529         |
| 0.068000        | 0.45366         |
| 0.063000        | 0.45193         |
| 0.058000        | 0.44991         |

| <b>Column 1</b> | <b>Column 2</b> |
|-----------------|-----------------|
| 0.053000        | 0.44696         |
| 0.048000        | 0.44358         |
| 0.043000        | 0.44066         |
| 0.038000        | 0.43751         |
| 0.033000        | 0.43448         |
| 0.028000        | 0.43143         |
| 0.023000        | 0.42698         |
| 0.018000        | 0.42186         |
| 0.013000        | 0.41630         |
| 0.0080000       | 0.40914         |
| 0.0030000       | 0.40121         |
| -0.0020000      | 0.39258         |
| -0.0070000      | 0.38234         |
| -0.012000       | 0.37093         |
| -0.017000       | 0.35784         |
| -0.022000       | 0.34228         |
| -0.027000       | 0.32430         |
| -0.032000       | 0.30573         |
| -0.037000       | 0.28593         |
| -0.042000       | 0.26125         |
| -0.047000       | 0.23258         |
| -0.052000       | 0.20013         |
| -0.057000       | 0.16215         |
| -0.062000       | 0.12052         |
| -0.067000       | 0.077400        |
| -0.072000       | 0.032780        |
| -0.077000       | -0.014210       |
| -0.082000       | -0.064280       |
| -0.087000       | -0.11727        |
| -0.092000       | -0.17116        |
| -0.097000       | -0.22505        |
| -0.10200        | -0.27956        |
| -0.10700        | -0.33351        |
| -0.11200        | -0.38532        |
| -0.11700        | -0.43469        |

| <b>Column 1</b> | <b>Column 2</b> |
|-----------------|-----------------|
| -0.12200        | -0.48163        |
| -0.12700        | -0.52529        |
| -0.13200        | -0.56498        |
| -0.13700        | -0.60122        |
| -0.14200        | -0.63380        |
| -0.14700        | -0.66245        |
| -0.15200        | -0.68701        |
| -0.15700        | -0.70730        |
| -0.16200        | -0.72448        |
| -0.16700        | -0.73864        |
| -0.17200        | -0.75013        |
| -0.17700        | -0.75909        |
| -0.18200        | -0.76518        |
| -0.18700        | -0.76962        |
| -0.19200        | -0.77182        |
| -0.19700        | -0.77206        |
| -0.20200        | -0.77201        |
| -0.20700        | -0.77090        |
| -0.21200        | -0.76884        |
| -0.21700        | -0.76687        |
| -0.22200        | -0.76441        |
| -0.22700        | -0.76090        |
| -0.23200        | -0.75663        |
| -0.23700        | -0.75293        |
| -0.24200        | -0.74903        |
| -0.24700        | -0.74421        |
| -0.25200        | -0.74001        |
| -0.25700        | -0.73565        |
| -0.26200        | -0.73073        |
| -0.26700        | -0.72625        |
| -0.27200        | -0.72234        |
| -0.27700        | -0.71764        |
| -0.28200        | -0.71195        |
| -0.28700        | -0.70694        |
| -0.29200        | -0.70424        |

| <b>Column 1</b> | <b>Column 2</b> |
|-----------------|-----------------|
| -0.29700        | -0.70243        |
| -0.30200        | -0.69827        |
| -0.30700        | -0.69291        |
| -0.31200        | -0.68834        |
| -0.31700        | -0.68499        |
| -0.32200        | -0.68074        |
| -0.32700        | -0.67699        |
| -0.33200        | -0.67356        |
| -0.33700        | -0.67016        |
| -0.34200        | -0.66736        |
| -0.34700        | -0.66093        |

### 8.3.24 CV-28

| <b>Column 1</b> | <b>Column 2</b> |
|-----------------|-----------------|
| -0.34800        | -0.65716        |
| -0.34300        | -0.63965        |
| -0.33800        | -0.63312        |
| -0.33300        | -0.62728        |
| -0.32800        | -0.62180        |
| -0.32300        | -0.61705        |
| -0.31800        | -0.61241        |
| -0.31300        | -0.60748        |
| -0.30800        | -0.60210        |
| -0.30300        | -0.59735        |
| -0.29800        | -0.59214        |
| -0.29300        | -0.58643        |
| -0.28800        | -0.58132        |
| -0.28300        | -0.57690        |
| -0.27800        | -0.57255        |
| -0.27300        | -0.56814        |
| -0.26800        | -0.56359        |
| -0.26300        | -0.55843        |
| -0.25800        | -0.55332        |
| -0.25300        | -0.54805        |
| -0.24800        | -0.54225        |

| <b>Column 1</b> | <b>Column 2</b> |
|-----------------|-----------------|
| -0.24300        | -0.53667        |
| -0.23800        | -0.53182        |
| -0.23300        | -0.52633        |
| -0.22800        | -0.51972        |
| -0.22300        | -0.51288        |
| -0.21800        | -0.50379        |
| -0.21300        | -0.49241        |
| -0.20800        | -0.48115        |
| -0.20300        | -0.47116        |
| -0.19800        | -0.46203        |
| -0.19300        | -0.45033        |
| -0.18800        | -0.43523        |
| -0.18300        | -0.41808        |
| -0.17800        | -0.39775        |
| -0.17300        | -0.37590        |
| -0.16800        | -0.35351        |
| -0.16300        | -0.32764        |
| -0.15800        | -0.29774        |
| -0.15300        | -0.26444        |
| -0.14800        | -0.23078        |
| -0.14300        | -0.19950        |
| -0.13800        | -0.16339        |
| -0.13300        | -0.11810        |
| -0.12800        | -0.070220       |
| -0.12300        | -0.021440       |
| -0.11800        | 0.029280        |
| -0.11300        | 0.079620        |
| -0.10800        | 0.12941         |
| -0.10300        | 0.17736         |
| -0.098000       | 0.22853         |
| -0.093000       | 0.28510         |
| -0.088000       | 0.33518         |
| -0.083000       | 0.37553         |
| -0.078000       | 0.41290         |
| -0.073000       | 0.45353         |



| <b>Column 1</b> | <b>Column 2</b> |
|-----------------|-----------------|
| -0.068000       | 0.49403         |
| -0.063000       | 0.52846         |
| -0.058000       | 0.56080         |
| -0.053000       | 0.58719         |
| -0.048000       | 0.60408         |
| -0.043000       | 0.61848         |
| -0.038000       | 0.63442         |
| -0.033000       | 0.64938         |
| -0.028000       | 0.66005         |
| -0.023000       | 0.66799         |
| -0.018000       | 0.67324         |
| -0.013000       | 0.67517         |
| -0.0080000      | 0.67656         |
| -0.0030000      | 0.67853         |
| 0.0020000       | 0.67882         |
| 0.0070000       | 0.67829         |
| 0.012000        | 0.67985         |
| 0.017000        | 0.68109         |
| 0.022000        | 0.68104         |
| 0.027000        | 0.68055         |
| 0.032000        | 0.67852         |
| 0.037000        | 0.67563         |
| 0.042000        | 0.67297         |
| 0.047000        | 0.66974         |
| 0.052000        | 0.66526         |
| 0.057000        | 0.66047         |
| 0.062000        | 0.65657         |
| 0.067000        | 0.65365         |
| 0.072000        | 0.65106         |
| 0.077000        | 0.64907         |
| 0.082000        | 0.64613         |
| 0.087000        | 0.64245         |
| 0.092000        | 0.64104         |
| 0.097000        | 0.63980         |
| 0.10200         | 0.63582         |

| <b>Column 1</b> | <b>Column 2</b> |
|-----------------|-----------------|
| 0.10700         | 0.62989         |
| 0.11200         | 0.62352         |
| 0.11700         | 0.61884         |
| 0.12200         | 0.61717         |
| 0.12700         | 0.61450         |
| 0.13200         | 0.60907         |
| 0.13700         | 0.60505         |
| 0.14200         | 0.60419         |
| 0.14700         | 0.60503         |
| 0.15200         | 0.60525         |
| 0.15700         | 0.60412         |
| 0.16200         | 0.60192         |
| 0.16700         | 0.59971         |
| 0.17200         | 0.59801         |
| 0.17700         | 0.59699         |
| 0.18200         | 0.59570         |
| 0.18700         | 0.59315         |
| 0.19200         | 0.58916         |
| 0.19700         | 0.58261         |
| 0.19800         | 0.57266         |
| 0.19300         | 0.57143         |
| 0.18800         | 0.55574         |
| 0.18300         | 0.55601         |
| 0.17800         | 0.56085         |
| 0.17300         | 0.56295         |
| 0.16800         | 0.55338         |
| 0.16300         | 0.54132         |
| 0.15800         | 0.53533         |
| 0.15300         | 0.53175         |
| 0.14800         | 0.52940         |
| 0.14300         | 0.52777         |
| 0.13800         | 0.52711         |
| 0.13300         | 0.52643         |
| 0.12800         | 0.52555         |
| 0.12300         | 0.52295         |

| <b>Column 1</b> | <b>Column 2</b> |
|-----------------|-----------------|
| 0.11800         | 0.51808         |
| 0.11300         | 0.51212         |
| 0.10800         | 0.50603         |
| 0.10300         | 0.49982         |
| 0.098000        | 0.49365         |
| 0.093000        | 0.48944         |
| 0.088000        | 0.48637         |
| 0.083000        | 0.48189         |
| 0.078000        | 0.47707         |
| 0.073000        | 0.47326         |
| 0.068000        | 0.46921         |
| 0.063000        | 0.46540         |
| 0.058000        | 0.46323         |
| 0.053000        | 0.46181         |
| 0.048000        | 0.45839         |
| 0.043000        | 0.45511         |
| 0.038000        | 0.45388         |
| 0.033000        | 0.45134         |
| 0.028000        | 0.44856         |
| 0.023000        | 0.44765         |
| 0.018000        | 0.44660         |
| 0.013000        | 0.44266         |
| 0.0080000       | 0.43488         |
| 0.0030000       | 0.42356         |
| -0.0020000      | 0.40989         |
| -0.0070000      | 0.39558         |
| -0.012000       | 0.38101         |
| -0.017000       | 0.36534         |
| -0.022000       | 0.34799         |
| -0.027000       | 0.32999         |
| -0.032000       | 0.31138         |
| -0.037000       | 0.28892         |
| -0.042000       | 0.26082         |
| -0.047000       | 0.22957         |
| -0.052000       | 0.19480         |

| <b>Column 1</b> | <b>Column 2</b> |
|-----------------|-----------------|
| -0.057000       | 0.15410         |
| -0.062000       | 0.10782         |
| -0.067000       | 0.057880        |
| -0.072000       | 0.0044900       |
| -0.077000       | -0.051440       |
| -0.082000       | -0.10776        |
| -0.087000       | -0.16366        |
| -0.092000       | -0.21891        |
| -0.097000       | -0.27537        |
| -0.10200        | -0.32352        |
| -0.10700        | -0.36698        |
| -0.11200        | -0.42810        |
| -0.11700        | -0.49338        |
| -0.12200        | -0.54522        |
| -0.12700        | -0.59182        |
| -0.13200        | -0.63693        |
| -0.13700        | -0.67929        |
| -0.14200        | -0.71524        |
| -0.14700        | -0.74453        |
| -0.15200        | -0.77110        |
| -0.15700        | -0.79474        |
| -0.16200        | -0.81377        |
| -0.16700        | -0.82841        |
| -0.17200        | -0.84017        |
| -0.17700        | -0.84927        |
| -0.18200        | -0.85497        |
| -0.18700        | -0.85768        |
| -0.19200        | -0.85883        |
| -0.19700        | -0.85917        |
| -0.20200        | -0.85831        |
| -0.20700        | -0.85564        |
| -0.21200        | -0.85188        |
| -0.21700        | -0.84835        |
| -0.22200        | -0.84424        |
| -0.22700        | -0.83940        |

| Column 1 | Column 2 |
|----------|----------|
| -0.23200 | -0.83489 |
| -0.23700 | -0.83073 |
| -0.24200 | -0.82659 |
| -0.24700 | -0.82185 |
| -0.25200 | -0.81656 |
| -0.25700 | -0.81050 |
| -0.26200 | -0.80463 |
| -0.26700 | -0.79963 |
| -0.27200 | -0.79411 |
| -0.27700 | -0.78832 |
| -0.28200 | -0.78228 |
| -0.28700 | -0.77708 |
| -0.29200 | -0.77309 |
| -0.29700 | -0.76996 |
| -0.30200 | -0.76703 |
| -0.30700 | -0.76308 |
| -0.31200 | -0.75844 |
| -0.31700 | -0.75405 |
| -0.32200 | -0.75054 |
| -0.32700 | -0.74679 |
| -0.33200 | -0.74332 |
| -0.33700 | -0.73822 |
| -0.34200 | -0.73396 |
| -0.34700 | -0.72837 |

### 8.3.25 CV-30

Global Evaluation 1

| Column 1 | Column 2 |
|----------|----------|
| -0.34800 | -0.78331 |
| -0.34300 | -0.76491 |
| -0.33800 | -0.76125 |
| -0.33300 | -0.75329 |
| -0.32800 | -0.74672 |
| -0.32300 | -0.73982 |
| -0.31800 | -0.73272 |

| <b>Column 1</b> | <b>Column 2</b> |
|-----------------|-----------------|
| -0.31300        | -0.72587        |
| -0.30800        | -0.71874        |
| -0.30300        | -0.71284        |
| -0.29800        | -0.70592        |
| -0.29300        | -0.69919        |
| -0.28800        | -0.69253        |
| -0.28300        | -0.68592        |
| -0.27800        | -0.68039        |
| -0.27300        | -0.67442        |
| -0.26800        | -0.66769        |
| -0.26300        | -0.66111        |
| -0.25800        | -0.65487        |
| -0.25300        | -0.64832        |
| -0.24800        | -0.64093        |
| -0.24300        | -0.63326        |
| -0.23800        | -0.62696        |
| -0.23300        | -0.61969        |
| -0.22800        | -0.61130        |
| -0.22300        | -0.60325        |
| -0.21800        | -0.59634        |
| -0.21300        | -0.59869        |
| -0.20800        | -0.59356        |
| -0.20300        | -0.56506        |
| -0.19800        | -0.54045        |
| -0.19300        | -0.52654        |
| -0.18800        | -0.50849        |
| -0.18300        | -0.48692        |
| -0.17800        | -0.46261        |
| -0.17300        | -0.43679        |
| -0.16800        | -0.40925        |
| -0.16300        | -0.37927        |
| -0.15800        | -0.34709        |
| -0.15300        | -0.31114        |
| -0.14800        | -0.27128        |
| -0.14300        | -0.22857        |

| <b>Column 1</b> | <b>Column 2</b> |
|-----------------|-----------------|
| -0.13800        | -0.18327        |
| -0.13300        | -0.13465        |
| -0.12800        | -0.083100       |
| -0.12300        | -0.028570       |
| -0.11800        | 0.028470        |
| -0.11300        | 0.087270        |
| -0.10800        | 0.14804         |
| -0.10300        | 0.21029         |
| -0.098000       | 0.27265         |
| -0.093000       | 0.33365         |
| -0.088000       | 0.39325         |
| -0.083000       | 0.45132         |
| -0.078000       | 0.50613         |
| -0.073000       | 0.55662         |
| -0.068000       | 0.60316         |
| -0.063000       | 0.64508         |
| -0.058000       | 0.68228         |
| -0.053000       | 0.71487         |
| -0.048000       | 0.74203         |
| -0.043000       | 0.76459         |
| -0.038000       | 0.78358         |
| -0.033000       | 0.79908         |
| -0.028000       | 0.81059         |
| -0.023000       | 0.81867         |
| -0.018000       | 0.82444         |
| -0.013000       | 0.82827         |
| -0.0080000      | 0.83046         |
| -0.0030000      | 0.83125         |
| 0.0020000       | 0.83098         |
| 0.0070000       | 0.82988         |
| 0.012000        | 0.82816         |
| 0.017000        | 0.82577         |
| 0.022000        | 0.82320         |
| 0.027000        | 0.82087         |
| 0.032000        | 0.81814         |

| <b>Column 1</b> | <b>Column 2</b> |
|-----------------|-----------------|
| 0.037000        | 0.81458         |
| 0.042000        | 0.81048         |
| 0.047000        | 0.80609         |
| 0.052000        | 0.80146         |
| 0.057000        | 0.79729         |
| 0.062000        | 0.79370         |
| 0.067000        | 0.78944         |
| 0.072000        | 0.78421         |
| 0.077000        | 0.77935         |
| 0.082000        | 0.77488         |
| 0.087000        | 0.77039         |
| 0.092000        | 0.76629         |
| 0.097000        | 0.76248         |
| 0.10200         | 0.75846         |
| 0.10700         | 0.75459         |
| 0.11200         | 0.75094         |
| 0.11700         | 0.74665         |
| 0.12200         | 0.74271         |
| 0.12700         | 0.73873         |
| 0.13200         | 0.73373         |
| 0.13700         | 0.72868         |
| 0.14200         | 0.72399         |
| 0.14700         | 0.71916         |
| 0.15200         | 0.71475         |
| 0.15700         | 0.71006         |
| 0.16200         | 0.70482         |
| 0.16700         | 0.70039         |
| 0.17200         | 0.69602         |
| 0.17700         | 0.69385         |
| 0.18200         | 0.69189         |
| 0.18700         | 0.69060         |
| 0.19200         | 0.68923         |
| 0.19700         | 0.68381         |
| 0.19800         | 0.67395         |
| 0.19300         | 0.67322         |



| <b>Column 1</b> | <b>Column 2</b> |
|-----------------|-----------------|
| 0.18800         | 0.65585         |
| 0.18300         | 0.65390         |
| 0.17800         | 0.64860         |
| 0.17300         | 0.64493         |
| 0.16800         | 0.64126         |
| 0.16300         | 0.63813         |
| 0.15800         | 0.63702         |
| 0.15300         | 0.63503         |
| 0.14800         | 0.63302         |
| 0.14300         | 0.63025         |
| 0.13800         | 0.62749         |
| 0.13300         | 0.62476         |
| 0.12800         | 0.62317         |
| 0.12300         | 0.62057         |
| 0.11800         | 0.61695         |
| 0.11300         | 0.61416         |
| 0.10800         | 0.61116         |
| 0.10300         | 0.60783         |
| 0.098000        | 0.60467         |
| 0.093000        | 0.60184         |
| 0.088000        | 0.59857         |
| 0.083000        | 0.59559         |
| 0.078000        | 0.59281         |
| 0.073000        | 0.58948         |
| 0.068000        | 0.58596         |
| 0.063000        | 0.58270         |
| 0.058000        | 0.57903         |
| 0.053000        | 0.57508         |
| 0.048000        | 0.57135         |
| 0.043000        | 0.56652         |
| 0.038000        | 0.56128         |
| 0.033000        | 0.55620         |
| 0.028000        | 0.55002         |
| 0.023000        | 0.54248         |
| 0.018000        | 0.53474         |

| <b>Column 1</b> | <b>Column 2</b> |
|-----------------|-----------------|
| 0.013000        | 0.52686         |
| 0.0080000       | 0.51737         |
| 0.0030000       | 0.50622         |
| -0.0020000      | 0.49363         |
| -0.0070000      | 0.47883         |
| -0.012000       | 0.46168         |
| -0.017000       | 0.44150         |
| -0.022000       | 0.41716         |
| -0.027000       | 0.38969         |
| -0.032000       | 0.35976         |
| -0.037000       | 0.32605         |
| -0.042000       | 0.28760         |
| -0.047000       | 0.24418         |
| -0.052000       | 0.19581         |
| -0.057000       | 0.14313         |
| -0.062000       | 0.086280        |
| -0.067000       | 0.024580        |
| -0.072000       | -0.041130       |
| -0.077000       | -0.10952        |
| -0.082000       | -0.18041        |
| -0.087000       | -0.25330        |
| -0.092000       | -0.32693        |
| -0.097000       | -0.40002        |
| -0.10200        | -0.47232        |
| -0.10700        | -0.54301        |
| -0.11200        | -0.61023        |
| -0.11700        | -0.67394        |
| -0.12200        | -0.73403        |
| -0.12700        | -0.78868        |
| -0.13200        | -0.83816        |
| -0.13700        | -0.88333        |
| -0.14200        | -0.92299        |
| -0.14700        | -0.95673        |
| -0.15200        | -0.98514        |
| -0.15700        | -1.0089         |

| <b>Column 1</b> | <b>Column 2</b> |
|-----------------|-----------------|
| -0.16200        | -1.0281         |
| -0.16700        | -1.0427         |
| -0.17200        | -1.0534         |
| -0.17700        | -1.0608         |
| -0.18200        | -1.0661         |
| -0.18700        | -1.0694         |
| -0.19200        | -1.0695         |
| -0.19700        | -1.0677         |
| -0.20200        | -1.0651         |
| -0.20700        | -1.0609         |
| -0.21200        | -1.0552         |
| -0.21700        | -1.0493         |
| -0.22200        | -1.0432         |
| -0.22700        | -1.0363         |
| -0.23200        | -1.0299         |
| -0.23700        | -1.0236         |
| -0.24200        | -1.0161         |
| -0.24700        | -1.0080         |
| -0.25200        | -1.0006         |
| -0.25700        | -0.99370        |
| -0.26200        | -0.98616        |
| -0.26700        | -0.97863        |
| -0.27200        | -0.97138        |
| -0.27700        | -0.96436        |
| -0.28200        | -0.95739        |
| -0.28700        | -0.95049        |
| -0.29200        | -0.94315        |
| -0.29700        | -0.93613        |
| -0.30200        | -0.92938        |
| -0.30700        | -0.92238        |
| -0.31200        | -0.91588        |
| -0.31700        | -0.90933        |
| -0.32200        | -0.90290        |
| -0.32700        | -0.89612        |
| -0.33200        | -0.89053        |

| Column 1 | Column 2 |
|----------|----------|
| -0.33700 | -0.88373 |
| -0.34200 | -0.87771 |
| -0.34700 | -0.87089 |

### 8.3.26 CV-36

| Column 1 | Column 2 |
|----------|----------|
| -0.34800 | -1.3850  |
| -0.34300 | -1.3289  |
| -0.33800 | -1.3192  |
| -0.33300 | -1.2916  |
| -0.32800 | -1.2695  |
| -0.32300 | -1.2474  |
| -0.31800 | -1.2235  |
| -0.31300 | -1.2018  |
| -0.30800 | -1.1809  |
| -0.30300 | -1.1634  |
| -0.29800 | -1.1453  |
| -0.29300 | -1.1265  |
| -0.28800 | -1.1074  |
| -0.28300 | -1.0900  |
| -0.27800 | -1.0717  |
| -0.27300 | -1.0527  |
| -0.26800 | -1.0336  |
| -0.26300 | -1.0147  |
| -0.25800 | -0.99674 |
| -0.25300 | -0.97832 |
| -0.24800 | -0.95986 |
| -0.24300 | -0.94116 |
| -0.23800 | -0.92220 |
| -0.23300 | -0.90184 |
| -0.22800 | -0.88173 |
| -0.22300 | -0.86265 |
| -0.21800 | -0.84123 |
| -0.21300 | -0.81805 |
| -0.20800 | -0.79525 |

| <b>Column 1</b> | <b>Column 2</b> |
|-----------------|-----------------|
| -0.20300        | -0.77034        |
| -0.19800        | -0.74219        |
| -0.19300        | -0.71187        |
| -0.18800        | -0.67848        |
| -0.18300        | -0.64193        |
| -0.17800        | -0.60155        |
| -0.17300        | -0.55725        |
| -0.16800        | -0.50908        |
| -0.16300        | -0.45659        |
| -0.15800        | -0.39897        |
| -0.15300        | -0.33487        |
| -0.14800        | -0.26486        |
| -0.14300        | -0.18946        |
| -0.13800        | -0.10775        |
| -0.13300        | -0.019280       |
| -0.12800        | 0.075560        |
| -0.12300        | 0.17695         |
| -0.11800        | 0.28449         |
| -0.11300        | 0.39695         |
| -0.10800        | 0.51358         |
| -0.10300        | 0.63509         |
| -0.098000       | 0.75989         |
| -0.093000       | 0.88644         |
| -0.088000       | 1.0150          |
| -0.083000       | 1.1426          |
| -0.078000       | 1.2680          |
| -0.073000       | 1.3907          |
| -0.068000       | 1.5068          |
| -0.063000       | 1.6154          |
| -0.058000       | 1.7168          |
| -0.053000       | 1.8091          |
| -0.048000       | 1.8901          |
| -0.043000       | 1.9594          |
| -0.038000       | 2.0175          |
| -0.033000       | 2.0647          |

| <b>Column 1</b> | <b>Column 2</b> |
|-----------------|-----------------|
| -0.028000       | 2.1013          |
| -0.023000       | 2.1287          |
| -0.018000       | 2.1476          |
| -0.013000       | 2.1585          |
| -0.0080000      | 2.1627          |
| -0.0030000      | 2.1615          |
| 0.0020000       | 2.1554          |
| 0.0070000       | 2.1451          |
| 0.012000        | 2.1323          |
| 0.017000        | 2.1171          |
| 0.022000        | 2.0998          |
| 0.027000        | 2.0817          |
| 0.032000        | 2.0623          |
| 0.037000        | 2.0415          |
| 0.042000        | 2.0202          |
| 0.047000        | 1.9982          |
| 0.052000        | 1.9757          |
| 0.057000        | 1.9533          |
| 0.062000        | 1.9307          |
| 0.067000        | 1.9081          |
| 0.072000        | 1.8855          |
| 0.077000        | 1.8633          |
| 0.082000        | 1.8412          |
| 0.087000        | 1.8196          |
| 0.092000        | 1.7980          |
| 0.097000        | 1.7759          |
| 0.10200         | 1.7549          |
| 0.10700         | 1.7349          |
| 0.11200         | 1.7148          |
| 0.11700         | 1.6941          |
| 0.12200         | 1.6743          |
| 0.12700         | 1.6542          |
| 0.13200         | 1.6344          |
| 0.13700         | 1.6146          |
| 0.14200         | 1.5950          |

| <b>Column 1</b> | <b>Column 2</b> |
|-----------------|-----------------|
| 0.14700         | 1.5758          |
| 0.15200         | 1.5564          |
| 0.15700         | 1.5378          |
| 0.16200         | 1.5183          |
| 0.16700         | 1.5006          |
| 0.17200         | 1.4817          |
| 0.17700         | 1.4641          |
| 0.18200         | 1.4456          |
| 0.18700         | 1.4290          |
| 0.19200         | 1.4119          |
| 0.19700         | 1.3922          |
| 0.19800         | 1.3786          |
| 0.19300         | 1.3793          |
| 0.18800         | 1.3194          |
| 0.18300         | 1.3110          |
| 0.17800         | 1.2910          |
| 0.17300         | 1.2735          |
| 0.16800         | 1.2581          |
| 0.16300         | 1.2405          |
| 0.15800         | 1.2254          |
| 0.15300         | 1.2082          |
| 0.14800         | 1.1937          |
| 0.14300         | 1.1771          |
| 0.13800         | 1.1612          |
| 0.13300         | 1.1449          |
| 0.12800         | 1.1298          |
| 0.12300         | 1.1139          |
| 0.11800         | 1.0985          |
| 0.11300         | 1.0841          |
| 0.10800         | 1.0686          |
| 0.10300         | 1.0538          |
| 0.098000        | 1.0392          |
| 0.093000        | 1.0246          |
| 0.088000        | 1.0091          |
| 0.083000        | 0.99409         |

| <b>Column 1</b> | <b>Column 2</b> |
|-----------------|-----------------|
| 0.078000        | 0.97918         |
| 0.073000        | 0.96344         |
| 0.068000        | 0.94738         |
| 0.063000        | 0.93124         |
| 0.058000        | 0.91468         |
| 0.053000        | 0.89761         |
| 0.048000        | 0.87973         |
| 0.043000        | 0.86043         |
| 0.038000        | 0.84024         |
| 0.033000        | 0.81834         |
| 0.028000        | 0.79474         |
| 0.023000        | 0.76875         |
| 0.018000        | 0.74051         |
| 0.013000        | 0.70907         |
| 0.0080000       | 0.67355         |
| 0.0030000       | 0.63356         |
| -0.0020000      | 0.58840         |
| -0.0070000      | 0.53791         |
| -0.012000       | 0.48000         |
| -0.017000       | 0.41462         |
| -0.022000       | 0.34091         |
| -0.027000       | 0.25714         |
| -0.032000       | 0.16288         |
| -0.037000       | 0.058320        |
| -0.042000       | -0.056130       |
| -0.047000       | -0.18121        |
| -0.052000       | -0.31734        |
| -0.057000       | -0.46251        |
| -0.062000       | -0.61496        |
| -0.067000       | -0.77447        |
| -0.072000       | -0.93974        |
| -0.077000       | -1.1079         |
| -0.082000       | -1.2761         |
| -0.087000       | -1.4432         |
| -0.092000       | -1.6066         |



| <b>Column 1</b> | <b>Column 2</b> |
|-----------------|-----------------|
| -0.097000       | -1.7641         |
| -0.10200        | -1.9139         |
| -0.10700        | -2.0533         |
| -0.11200        | -2.1817         |
| -0.11700        | -2.2981         |
| -0.12200        | -2.4014         |
| -0.12700        | -2.4905         |
| -0.13200        | -2.5667         |
| -0.13700        | -2.6301         |
| -0.14200        | -2.6794         |
| -0.14700        | -2.7165         |
| -0.15200        | -2.7421         |
| -0.15700        | -2.7564         |
| -0.16200        | -2.7604         |
| -0.16700        | -2.7560         |
| -0.17200        | -2.7447         |
| -0.17700        | -2.7263         |
| -0.18200        | -2.7019         |
| -0.18700        | -2.6739         |
| -0.19200        | -2.6425         |
| -0.19700        | -2.6080         |
| -0.20200        | -2.5712         |
| -0.20700        | -2.5317         |
| -0.21200        | -2.4912         |
| -0.21700        | -2.4505         |
| -0.22200        | -2.4098         |
| -0.22700        | -2.3683         |
| -0.23200        | -2.3269         |
| -0.23700        | -2.2859         |
| -0.24200        | -2.2448         |
| -0.24700        | -2.2039         |
| -0.25200        | -2.1640         |
| -0.25700        | -2.1248         |
| -0.26200        | -2.0855         |
| -0.26700        | -2.0470         |

| <b>Column 1</b> | <b>Column 2</b> |
|-----------------|-----------------|
| -0.27200        | -2.0083         |
| -0.27700        | -1.9717         |
| -0.28200        | -1.9354         |
| -0.28700        | -1.8993         |
| -0.29200        | -1.8639         |
| -0.29700        | -1.8293         |
| -0.30200        | -1.7952         |
| -0.30700        | -1.7613         |
| -0.31200        | -1.7296         |
| -0.31700        | -1.6967         |
| -0.32200        | -1.6661         |
| -0.32700        | -1.6339         |
| -0.33200        | -1.6055         |
| -0.33700        | -1.5751         |
| -0.34200        | -1.5466         |
| -0.34700        | -1.5189         |

### 8.3.27 CV-38

| <b>Column 1</b> | <b>Column 2</b> |
|-----------------|-----------------|
| -0.34800        | -1.5214         |
| -0.34300        | -1.4579         |
| -0.33800        | -1.4386         |
| -0.33300        | -1.3990         |
| -0.32800        | -1.3646         |
| -0.32300        | -1.3323         |
| -0.31800        | -1.2987         |
| -0.31300        | -1.2681         |
| -0.30800        | -1.2360         |
| -0.30300        | -1.2066         |
| -0.29800        | -1.1765         |
| -0.29300        | -1.1483         |
| -0.28800        | -1.1201         |
| -0.28300        | -1.0921         |
| -0.27800        | -1.0646         |
| -0.27300        | -1.0379         |

| <b>Column 1</b> | <b>Column 2</b> |
|-----------------|-----------------|
| -0.26800        | -1.0121         |
| -0.26300        | -0.98582        |
| -0.25800        | -0.95971        |
| -0.25300        | -0.93345        |
| -0.24800        | -0.90831        |
| -0.24300        | -0.88295        |
| -0.23800        | -0.85716        |
| -0.23300        | -0.83055        |
| -0.22800        | -0.80404        |
| -0.22300        | -0.77704        |
| -0.21800        | -0.74850        |
| -0.21300        | -0.71909        |
| -0.20800        | -0.68808        |
| -0.20300        | -0.65513        |
| -0.19800        | -0.62016        |
| -0.19300        | -0.58282        |
| -0.18800        | -0.54138        |
| -0.18300        | -0.49637        |
| -0.17800        | -0.44779        |
| -0.17300        | -0.39376        |
| -0.16800        | -0.33432        |
| -0.16300        | -0.26940        |
| -0.15800        | -0.19765        |
| -0.15300        | -0.11934        |
| -0.14800        | -0.034250       |
| -0.14300        | 0.059260        |
| -0.13800        | 0.16131         |
| -0.13300        | 0.27200         |
| -0.12800        | 0.39088         |
| -0.12300        | 0.51823         |
| -0.11800        | 0.65421         |
| -0.11300        | 0.79816         |
| -0.10800        | 0.95015         |
| -0.10300        | 1.1096          |
| -0.098000       | 1.2754          |

| <b>Column 1</b> | <b>Column 2</b> |
|-----------------|-----------------|
| -0.093000       | 1.4470          |
| -0.088000       | 1.6225          |
| -0.083000       | 1.7987          |
| -0.078000       | 1.9757          |
| -0.073000       | 2.1518          |
| -0.068000       | 2.3225          |
| -0.063000       | 2.4851          |
| -0.058000       | 2.6379          |
| -0.053000       | 2.7782          |
| -0.048000       | 2.9033          |
| -0.043000       | 3.0127          |
| -0.038000       | 3.1041          |
| -0.033000       | 3.1770          |
| -0.028000       | 3.2328          |
| -0.023000       | 3.2722          |
| -0.018000       | 3.2959          |
| -0.013000       | 3.3063          |
| -0.0080000      | 3.3048          |
| -0.0030000      | 3.2926          |
| 0.0020000       | 3.2726          |
| 0.0070000       | 3.2453          |
| 0.012000        | 3.2117          |
| 0.017000        | 3.1738          |
| 0.022000        | 3.1329          |
| 0.027000        | 3.0889          |
| 0.032000        | 3.0426          |
| 0.037000        | 2.9946          |
| 0.042000        | 2.9450          |
| 0.047000        | 2.8958          |
| 0.052000        | 2.8461          |
| 0.057000        | 2.7961          |
| 0.062000        | 2.7462          |
| 0.067000        | 2.6964          |
| 0.072000        | 2.6474          |
| 0.077000        | 2.5988          |

| <b>Column 1</b> | <b>Column 2</b> |
|-----------------|-----------------|
| 0.082000        | 2.5494          |
| 0.087000        | 2.5014          |
| 0.092000        | 2.4541          |
| 0.097000        | 2.4069          |
| 0.10200         | 2.3610          |
| 0.10700         | 2.3154          |
| 0.11200         | 2.2708          |
| 0.11700         | 2.2269          |
| 0.12200         | 2.1844          |
| 0.12700         | 2.1416          |
| 0.13200         | 2.0994          |
| 0.13700         | 2.0585          |
| 0.14200         | 2.0183          |
| 0.14700         | 1.9788          |
| 0.15200         | 1.9395          |
| 0.15700         | 1.9018          |
| 0.16200         | 1.8638          |
| 0.16700         | 1.8281          |
| 0.17200         | 1.7911          |
| 0.17700         | 1.7570          |
| 0.18200         | 1.7213          |
| 0.18700         | 1.6882          |
| 0.19200         | 1.6560          |
| 0.19700         | 1.6180          |
| 0.19800         | 1.6028          |
| 0.19300         | 1.5757          |
| 0.18800         | 1.5016          |
| 0.18300         | 1.4776          |
| 0.17800         | 1.4433          |
| 0.17300         | 1.4129          |
| 0.16800         | 1.3836          |
| 0.16300         | 1.3525          |
| 0.15800         | 1.3245          |
| 0.15300         | 1.2948          |
| 0.14800         | 1.2680          |

| <b>Column 1</b> | <b>Column 2</b> |
|-----------------|-----------------|
| 0.14300         | 1.2394          |
| 0.13800         | 1.2125          |
| 0.13300         | 1.1861          |
| 0.12800         | 1.1603          |
| 0.12300         | 1.1342          |
| 0.11800         | 1.1090          |
| 0.11300         | 1.0849          |
| 0.10800         | 1.0600          |
| 0.10300         | 1.0356          |
| 0.098000        | 1.0113          |
| 0.093000        | 0.98729         |
| 0.088000        | 0.96349         |
| 0.083000        | 0.93985         |
| 0.078000        | 0.91531         |
| 0.073000        | 0.89148         |
| 0.068000        | 0.86759         |
| 0.063000        | 0.84231         |
| 0.058000        | 0.81630         |
| 0.053000        | 0.78975         |
| 0.048000        | 0.76206         |
| 0.043000        | 0.73206         |
| 0.038000        | 0.70085         |
| 0.033000        | 0.66723         |
| 0.028000        | 0.63009         |
| 0.023000        | 0.58943         |
| 0.018000        | 0.54482         |
| 0.013000        | 0.49441         |
| 0.0080000       | 0.43762         |
| 0.0030000       | 0.37411         |
| -0.0020000      | 0.30151         |
| -0.0070000      | 0.21901         |
| -0.012000       | 0.12625         |
| -0.017000       | 0.021390        |
| -0.022000       | -0.097400       |
| -0.027000       | -0.23011        |

| <b>Column 1</b> | <b>Column 2</b> |
|-----------------|-----------------|
| -0.032000       | -0.37807        |
| -0.037000       | -0.54189        |
| -0.042000       | -0.72107        |
| -0.047000       | -0.91521        |
| -0.052000       | -1.1230         |
| -0.057000       | -1.3431         |
| -0.062000       | -1.5729         |
| -0.067000       | -1.8092         |
| -0.072000       | -2.0495         |
| -0.077000       | -2.2899         |
| -0.082000       | -2.5269         |
| -0.087000       | -2.7576         |
| -0.092000       | -2.9775         |
| -0.097000       | -3.1846         |
| -0.10200        | -3.3762         |
| -0.10700        | -3.5485         |
| -0.11200        | -3.7018         |
| -0.11700        | -3.8348         |
| -0.12200        | -3.9453         |
| -0.12700        | -4.0335         |
| -0.13200        | -4.1012         |
| -0.13700        | -4.1482         |
| -0.14200        | -4.1739         |
| -0.14700        | -4.1817         |
| -0.15200        | -4.1721         |
| -0.15700        | -4.1467         |
| -0.16200        | -4.1083         |
| -0.16700        | -4.0577         |
| -0.17200        | -3.9970         |
| -0.17700        | -3.9285         |
| -0.18200        | -3.8529         |
| -0.18700        | -3.7718         |
| -0.19200        | -3.6865         |
| -0.19700        | -3.5988         |
| -0.20200        | -3.5096         |

| Column 1 | Column 2 |
|----------|----------|
| -0.20700 | -3.4189  |
| -0.21200 | -3.3281  |
| -0.21700 | -3.2378  |
| -0.22200 | -3.1495  |
| -0.22700 | -3.0612  |
| -0.23200 | -2.9730  |
| -0.23700 | -2.8872  |
| -0.24200 | -2.8037  |
| -0.24700 | -2.7223  |
| -0.25200 | -2.6428  |
| -0.25700 | -2.5647  |
| -0.26200 | -2.4887  |
| -0.26700 | -2.4154  |
| -0.27200 | -2.3432  |
| -0.27700 | -2.2745  |
| -0.28200 | -2.2076  |
| -0.28700 | -2.1419  |
| -0.29200 | -2.0785  |
| -0.29700 | -2.0176  |
| -0.30200 | -1.9580  |
| -0.30700 | -1.8996  |
| -0.31200 | -1.8443  |
| -0.31700 | -1.7893  |
| -0.32200 | -1.7373  |
| -0.32700 | -1.6855  |
| -0.33200 | -1.6381  |
| -0.33700 | -1.5891  |
| -0.34200 | -1.5441  |
| -0.34700 | -1.4992  |

### 8.3.28 CV-39

| Column 1 | Column 2 |
|----------|----------|
| -0.34800 | -1.4523  |
| -0.34300 | -1.3899  |
| -0.33800 | -1.3538  |



| <b>Column 1</b> | <b>Column 2</b> |
|-----------------|-----------------|
| -0.33300        | -1.3102         |
| -0.32800        | -1.2696         |
| -0.32300        | -1.2318         |
| -0.31800        | -1.1931         |
| -0.31300        | -1.1576         |
| -0.30800        | -1.1215         |
| -0.30300        | -1.0877         |
| -0.29800        | -1.0541         |
| -0.29300        | -1.0221         |
| -0.28800        | -0.99116        |
| -0.28300        | -0.96064        |
| -0.27800        | -0.93055        |
| -0.27300        | -0.90125        |
| -0.26800        | -0.87235        |
| -0.26300        | -0.84398        |
| -0.25800        | -0.81668        |
| -0.25300        | -0.78889        |
| -0.24800        | -0.76171        |
| -0.24300        | -0.73473        |
| -0.23800        | -0.70788        |
| -0.23300        | -0.68032        |
| -0.22800        | -0.65214        |
| -0.22300        | -0.62363        |
| -0.21800        | -0.59415        |
| -0.21300        | -0.56385        |
| -0.20800        | -0.53150        |
| -0.20300        | -0.49640        |
| -0.19800        | -0.45910        |
| -0.19300        | -0.41923        |
| -0.18800        | -0.37514        |
| -0.18300        | -0.32663        |
| -0.17800        | -0.27349        |
| -0.17300        | -0.21513        |
| -0.16800        | -0.15080        |
| -0.16300        | -0.079460       |

| <b>Column 1</b> | <b>Column 2</b> |
|-----------------|-----------------|
| -0.15800        | -6.0083E-4      |
| -0.15300        | 0.086340        |
| -0.14800        | 0.18153         |
| -0.14300        | 0.28562         |
| -0.13800        | 0.39991         |
| -0.13300        | 0.52418         |
| -0.12800        | 0.65792         |
| -0.12300        | 0.80273         |
| -0.11800        | 0.95852         |
| -0.11300        | 1.1246          |
| -0.10800        | 1.3011          |
| -0.10300        | 1.4875          |
| -0.098000       | 1.6824          |
| -0.093000       | 1.8851          |
| -0.088000       | 2.0951          |
| -0.083000       | 2.3088          |
| -0.078000       | 2.5242          |
| -0.073000       | 2.7395          |
| -0.068000       | 2.9504          |
| -0.063000       | 3.1537          |
| -0.058000       | 3.3464          |
| -0.053000       | 3.5243          |
| -0.048000       | 3.6836          |
| -0.043000       | 3.8230          |
| -0.038000       | 3.9397          |
| -0.033000       | 4.0313          |
| -0.028000       | 4.0999          |
| -0.023000       | 4.1452          |
| -0.018000       | 4.1682          |
| -0.013000       | 4.1727          |
| -0.0080000      | 4.1592          |
| -0.0030000      | 4.1307          |
| 0.0020000       | 4.0911          |
| 0.0070000       | 4.0405          |
| 0.012000        | 3.9812          |

| <b>Column 1</b> | <b>Column 2</b> |
|-----------------|-----------------|
| 0.017000        | 3.9151          |
| 0.022000        | 3.8444          |
| 0.027000        | 3.7710          |
| 0.032000        | 3.6941          |
| 0.037000        | 3.6152          |
| 0.042000        | 3.5360          |
| 0.047000        | 3.4565          |
| 0.052000        | 3.3766          |
| 0.057000        | 3.2969          |
| 0.062000        | 3.2171          |
| 0.067000        | 3.1379          |
| 0.072000        | 3.0603          |
| 0.077000        | 2.9849          |
| 0.082000        | 2.9101          |
| 0.087000        | 2.8356          |
| 0.092000        | 2.7627          |
| 0.097000        | 2.6918          |
| 0.10200         | 2.6227          |
| 0.10700         | 2.5550          |
| 0.11200         | 2.4889          |
| 0.11700         | 2.4236          |
| 0.12200         | 2.3606          |
| 0.12700         | 2.2985          |
| 0.13200         | 2.2380          |
| 0.13700         | 2.1790          |
| 0.14200         | 2.1213          |
| 0.14700         | 2.0655          |
| 0.15200         | 2.0102          |
| 0.15700         | 1.9573          |
| 0.16200         | 1.9047          |
| 0.16700         | 1.8550          |
| 0.17200         | 1.8049          |
| 0.17700         | 1.7572          |
| 0.18200         | 1.7091          |
| 0.18700         | 1.6636          |

| <b>Column 1</b> | <b>Column 2</b> |
|-----------------|-----------------|
| 0.19200         | 1.6211          |
| 0.19700         | 1.5719          |
| 0.19800         | 1.5495          |
| 0.19300         | 1.4942          |
| 0.18800         | 1.4290          |
| 0.18300         | 1.3925          |
| 0.17800         | 1.3512          |
| 0.17300         | 1.3122          |
| 0.16800         | 1.2744          |
| 0.16300         | 1.2375          |
| 0.15800         | 1.2018          |
| 0.15300         | 1.1666          |
| 0.14800         | 1.1330          |
| 0.14300         | 1.0989          |
| 0.13800         | 1.0671          |
| 0.13300         | 1.0359          |
| 0.12800         | 1.0050          |
| 0.12300         | 0.97470         |
| 0.11800         | 0.94535         |
| 0.11300         | 0.91683         |
| 0.10800         | 0.88864         |
| 0.10300         | 0.86072         |
| 0.098000        | 0.83297         |
| 0.093000        | 0.80579         |
| 0.088000        | 0.77901         |
| 0.083000        | 0.75275         |
| 0.078000        | 0.72533         |
| 0.073000        | 0.69789         |
| 0.068000        | 0.67107         |
| 0.063000        | 0.64304         |
| 0.058000        | 0.61370         |
| 0.053000        | 0.58326         |
| 0.048000        | 0.55121         |
| 0.043000        | 0.51726         |
| 0.038000        | 0.48062         |

| <b>Column 1</b> | <b>Column 2</b> |
|-----------------|-----------------|
| 0.033000        | 0.44048         |
| 0.028000        | 0.39623         |
| 0.023000        | 0.34690         |
| 0.018000        | 0.29218         |
| 0.013000        | 0.23001         |
| 0.0080000       | 0.15933         |
| 0.0030000       | 0.078470        |
| -0.0020000      | -0.014480       |
| -0.0070000      | -0.11900        |
| -0.012000       | -0.23748        |
| -0.017000       | -0.37275        |
| -0.022000       | -0.52567        |
| -0.027000       | -0.69677        |
| -0.032000       | -0.88718        |
| -0.037000       | -1.0973         |
| -0.042000       | -1.3259         |
| -0.047000       | -1.5725         |
| -0.052000       | -1.8355         |
| -0.057000       | -2.1114         |
| -0.062000       | -2.3968         |
| -0.067000       | -2.6881         |
| -0.072000       | -2.9803         |
| -0.077000       | -3.2698         |
| -0.082000       | -3.5515         |
| -0.087000       | -3.8206         |
| -0.092000       | -4.0733         |
| -0.097000       | -4.3054         |
| -0.10200        | -4.5146         |
| -0.10700        | -4.6975         |
| -0.11200        | -4.8526         |
| -0.11700        | -4.9799         |
| -0.12200        | -5.0770         |
| -0.12700        | -5.1442         |
| -0.13200        | -5.1839         |
| -0.13700        | -5.1978         |

| <b>Column 1</b> | <b>Column 2</b> |
|-----------------|-----------------|
| -0.14200        | -5.1868         |
| -0.14700        | -5.1514         |
| -0.15200        | -5.0947         |
| -0.15700        | -5.0201         |
| -0.16200        | -4.9298         |
| -0.16700        | -4.8256         |
| -0.17200        | -4.7099         |
| -0.17700        | -4.5867         |
| -0.18200        | -4.4572         |
| -0.18700        | -4.3214         |
| -0.19200        | -4.1827         |
| -0.19700        | -4.0447         |
| -0.20200        | -3.9059         |
| -0.20700        | -3.7676         |
| -0.21200        | -3.6325         |
| -0.21700        | -3.4990         |
| -0.22200        | -3.3677         |
| -0.22700        | -3.2400         |
| -0.23200        | -3.1166         |
| -0.23700        | -2.9969         |
| -0.24200        | -2.8808         |
| -0.24700        | -2.7684         |
| -0.25200        | -2.6597         |
| -0.25700        | -2.5557         |
| -0.26200        | -2.4557         |
| -0.26700        | -2.3582         |
| -0.27200        | -2.2643         |
| -0.27700        | -2.1756         |
| -0.28200        | -2.0898         |
| -0.28700        | -2.0067         |
| -0.29200        | -1.9278         |
| -0.29700        | -1.8531         |
| -0.30200        | -1.7799         |
| -0.30700        | -1.7098         |
| -0.31200        | -1.6436         |

| Column 1 | Column 2 |
|----------|----------|
| -0.31700 | -1.5798  |
| -0.32200 | -1.5183  |
| -0.32700 | -1.4590  |
| -0.33200 | -1.4030  |
| -0.33700 | -1.3479  |
| -0.34200 | -1.2981  |
| -0.34700 | -1.2456  |

### 8.3.29 CV-40

| Column 1 | Column 2 |
|----------|----------|
| -0.34800 | -1.2072  |
| -0.34300 | -1.1539  |
| -0.33800 | -1.0892  |
| -0.33300 | -1.0497  |
| -0.32800 | -1.0057  |
| -0.32300 | -0.96614 |
| -0.31800 | -0.92766 |
| -0.31300 | -0.88990 |
| -0.30800 | -0.85487 |
| -0.30300 | -0.82079 |
| -0.29800 | -0.78834 |
| -0.29300 | -0.75623 |
| -0.28800 | -0.72558 |
| -0.28300 | -0.69607 |
| -0.27800 | -0.66786 |
| -0.27300 | -0.63988 |
| -0.26800 | -0.61275 |
| -0.26300 | -0.58666 |
| -0.25800 | -0.56138 |
| -0.25300 | -0.53587 |
| -0.24800 | -0.51048 |
| -0.24300 | -0.48599 |
| -0.23800 | -0.46124 |
| -0.23300 | -0.43614 |
| -0.22800 | -0.41014 |

| <b>Column 1</b> | <b>Column 2</b> |
|-----------------|-----------------|
| -0.22300        | -0.38352        |
| -0.21800        | -0.35565        |
| -0.21300        | -0.32620        |
| -0.20800        | -0.29491        |
| -0.20300        | -0.26077        |
| -0.19800        | -0.22348        |
| -0.19300        | -0.18280        |
| -0.18800        | -0.13814        |
| -0.18300        | -0.088720       |
| -0.17800        | -0.033400       |
| -0.17300        | 0.028980        |
| -0.16800        | 0.098080        |
| -0.16300        | 0.17487         |
| -0.15800        | 0.26102         |
| -0.15300        | 0.35699         |
| -0.14800        | 0.46258         |
| -0.14300        | 0.57889         |
| -0.13800        | 0.70753         |
| -0.13300        | 0.84856         |
| -0.12800        | 1.0020          |
| -0.12300        | 1.1686          |
| -0.11800        | 1.3488          |
| -0.11300        | 1.5429          |
| -0.10800        | 1.7515          |
| -0.10300        | 1.9734          |
| -0.098000       | 2.2074          |
| -0.093000       | 2.4536          |
| -0.088000       | 2.7100          |
| -0.083000       | 2.9735          |
| -0.078000       | 3.2422          |
| -0.073000       | 3.5128          |
| -0.068000       | 3.7802          |
| -0.063000       | 4.0399          |
| -0.058000       | 4.2871          |
| -0.053000       | 4.5170          |



| <b>Column 1</b> | <b>Column 2</b> |
|-----------------|-----------------|
| -0.048000       | 4.7236          |
| -0.043000       | 4.9013          |
| -0.038000       | 5.0480          |
| -0.033000       | 5.1615          |
| -0.028000       | 5.2400          |
| -0.023000       | 5.2851          |
| -0.018000       | 5.2983          |
| -0.013000       | 5.2819          |
| -0.0080000      | 5.2405          |
| -0.0030000      | 5.1769          |
| 0.0020000       | 5.0946          |
| 0.0070000       | 4.9980          |
| 0.012000        | 4.8895          |
| 0.017000        | 4.7710          |
| 0.022000        | 4.6462          |
| 0.027000        | 4.5178          |
| 0.032000        | 4.3862          |
| 0.037000        | 4.2535          |
| 0.042000        | 4.1205          |
| 0.047000        | 3.9873          |
| 0.052000        | 3.8561          |
| 0.057000        | 3.7274          |
| 0.062000        | 3.5999          |
| 0.067000        | 3.4748          |
| 0.072000        | 3.3531          |
| 0.077000        | 3.2343          |
| 0.082000        | 3.1191          |
| 0.087000        | 3.0075          |
| 0.092000        | 2.8981          |
| 0.097000        | 2.7918          |
| 0.10200         | 2.6902          |
| 0.10700         | 2.5910          |
| 0.11200         | 2.4946          |
| 0.11700         | 2.4023          |
| 0.12200         | 2.3128          |

| <b>Column 1</b> | <b>Column 2</b> |
|-----------------|-----------------|
| 0.12700         | 2.2262          |
| 0.13200         | 2.1427          |
| 0.13700         | 2.0628          |
| 0.14200         | 1.9853          |
| 0.14700         | 1.9102          |
| 0.15200         | 1.8383          |
| 0.15700         | 1.7692          |
| 0.16200         | 1.7018          |
| 0.16700         | 1.6373          |
| 0.17200         | 1.5757          |
| 0.17700         | 1.5154          |
| 0.18200         | 1.4582          |
| 0.18700         | 1.4022          |
| 0.19200         | 1.3511          |
| 0.19700         | 1.2957          |
| 0.19800         | 1.2568          |
| 0.19300         | 1.1743          |
| 0.18800         | 1.1366          |
| 0.18300         | 1.0878          |
| 0.17800         | 1.0431          |
| 0.17300         | 1.0003          |
| 0.16800         | 0.95827         |
| 0.16300         | 0.91924         |
| 0.15800         | 0.88031         |
| 0.15300         | 0.84405         |
| 0.14800         | 0.80833         |
| 0.14300         | 0.77451         |
| 0.13800         | 0.74136         |
| 0.13300         | 0.71011         |
| 0.12800         | 0.67954         |
| 0.12300         | 0.64940         |
| 0.11800         | 0.62118         |
| 0.11300         | 0.59312         |
| 0.10800         | 0.56589         |
| 0.10300         | 0.53941         |

| <b>Column 1</b> | <b>Column 2</b> |
|-----------------|-----------------|
| 0.098000        | 0.51339         |
| 0.093000        | 0.48769         |
| 0.088000        | 0.46243         |
| 0.083000        | 0.43703         |
| 0.078000        | 0.41144         |
| 0.073000        | 0.38538         |
| 0.068000        | 0.35898         |
| 0.063000        | 0.33161         |
| 0.058000        | 0.30231         |
| 0.053000        | 0.27144         |
| 0.048000        | 0.23785         |
| 0.043000        | 0.20083         |
| 0.038000        | 0.16027         |
| 0.033000        | 0.11519         |
| 0.028000        | 0.063430        |
| 0.023000        | 0.0046600       |
| 0.018000        | -0.062080       |
| 0.013000        | -0.13935        |
| 0.0080000       | -0.22818        |
| 0.0030000       | -0.33158        |
| -0.0020000      | -0.45163        |
| -0.0070000      | -0.58814        |
| -0.012000       | -0.74414        |
| -0.017000       | -0.92270        |
| -0.022000       | -1.1246         |
| -0.027000       | -1.3509         |
| -0.032000       | -1.6018         |
| -0.037000       | -1.8775         |
| -0.042000       | -2.1766         |
| -0.047000       | -2.4959         |
| -0.052000       | -2.8337         |
| -0.057000       | -3.1844         |
| -0.062000       | -3.5421         |
| -0.067000       | -3.9028         |
| -0.072000       | -4.2594         |

| <b>Column 1</b> | <b>Column 2</b> |
|-----------------|-----------------|
| -0.077000       | -4.6051         |
| -0.082000       | -4.9337         |
| -0.087000       | -5.2391         |
| -0.092000       | -5.5165         |
| -0.097000       | -5.7609         |
| -0.10200        | -5.9702         |
| -0.10700        | -6.1403         |
| -0.11200        | -6.2689         |
| -0.11700        | -6.3577         |
| -0.12200        | -6.4058         |
| -0.12700        | -6.4139         |
| -0.13200        | -6.3844         |
| -0.13700        | -6.3210         |
| -0.14200        | -6.2264         |
| -0.14700        | -6.1026         |
| -0.15200        | -5.9560         |
| -0.15700        | -5.7886         |
| -0.16200        | -5.6027         |
| -0.16700        | -5.4058         |
| -0.17200        | -5.2000         |
| -0.17700        | -4.9869         |
| -0.18200        | -4.7721         |
| -0.18700        | -4.5568         |
| -0.19200        | -4.3412         |
| -0.19700        | -4.1293         |
| -0.20200        | -3.9234         |
| -0.20700        | -3.7234         |
| -0.21200        | -3.5299         |
| -0.21700        | -3.3440         |
| -0.22200        | -3.1647         |
| -0.22700        | -2.9934         |
| -0.23200        | -2.8304         |
| -0.23700        | -2.6751         |
| -0.24200        | -2.5279         |
| -0.24700        | -2.3883         |

| <b>Column 1</b> | <b>Column 2</b> |
|-----------------|-----------------|
| -0.25200        | -2.2567         |
| -0.25700        | -2.1320         |
| -0.26200        | -2.0137         |
| -0.26700        | -1.9009         |
| -0.27200        | -1.7957         |
| -0.27700        | -1.6973         |
| -0.28200        | -1.6050         |
| -0.28700        | -1.5175         |
| -0.29200        | -1.4355         |
| -0.29700        | -1.3586         |
| -0.30200        | -1.2839         |
| -0.30700        | -1.2137         |
| -0.31200        | -1.1477         |
| -0.31700        | -1.0875         |
| -0.32200        | -1.0302         |
| -0.32700        | -0.97779        |
| -0.33200        | -0.92710        |
| -0.33700        | -0.87959        |
| -0.34200        | -0.83620        |
| -0.34700        | -0.78893        |

### 8.3.30 CV-41

| <b>Column 1</b> | <b>Column 2</b> |
|-----------------|-----------------|
| -0.34800        | -0.76412        |
| -0.34300        | -0.73065        |
| -0.33800        | -0.65631        |
| -0.33300        | -0.62861        |
| -0.32800        | -0.59289        |
| -0.32300        | -0.56166        |
| -0.31800        | -0.53236        |
| -0.31300        | -0.50264        |
| -0.30800        | -0.47695        |
| -0.30300        | -0.45079        |
| -0.29800        | -0.42736        |
| -0.29300        | -0.40372        |

| <b>Column 1</b> | <b>Column 2</b> |
|-----------------|-----------------|
| -0.28800        | -0.38248        |
| -0.28300        | -0.36101        |
| -0.27800        | -0.34105        |
| -0.27300        | -0.32145        |
| -0.26800        | -0.30206        |
| -0.26300        | -0.28372        |
| -0.25800        | -0.26535        |
| -0.25300        | -0.24727        |
| -0.24800        | -0.22859        |
| -0.24300        | -0.21038        |
| -0.23800        | -0.19149        |
| -0.23300        | -0.17225        |
| -0.22800        | -0.15219        |
| -0.22300        | -0.13062        |
| -0.21800        | -0.10702        |
| -0.21300        | -0.081610       |
| -0.20800        | -0.053540       |
| -0.20300        | -0.021940       |
| -0.19800        | 0.013430        |
| -0.19300        | 0.053570        |
| -0.18800        | 0.098500        |
| -0.18300        | 0.14977         |
| -0.17800        | 0.20778         |
| -0.17300        | 0.27414         |
| -0.16800        | 0.34961         |
| -0.16300        | 0.43378         |
| -0.15800        | 0.52883         |
| -0.15300        | 0.63632         |
| -0.14800        | 0.75650         |
| -0.14300        | 0.89021         |
| -0.13800        | 1.0383          |
| -0.13300        | 1.2022          |
| -0.12800        | 1.3831          |
| -0.12300        | 1.5810          |
| -0.11800        | 1.7968          |

| <b>Column 1</b> | <b>Column 2</b> |
|-----------------|-----------------|
| -0.11300        | 2.0313          |
| -0.10800        | 2.2852          |
| -0.10300        | 2.5579          |
| -0.098000       | 2.8480          |
| -0.093000       | 3.1556          |
| -0.088000       | 3.4792          |
| -0.083000       | 3.8150          |
| -0.078000       | 4.1594          |
| -0.073000       | 4.5087          |
| -0.068000       | 4.8566          |
| -0.063000       | 5.1955          |
| -0.058000       | 5.5183          |
| -0.053000       | 5.8170          |
| -0.048000       | 6.0826          |
| -0.043000       | 6.3076          |
| -0.038000       | 6.4859          |
| -0.033000       | 6.6136          |
| -0.028000       | 6.6897          |
| -0.023000       | 6.7121          |
| -0.018000       | 6.6843          |
| -0.013000       | 6.6134          |
| -0.0080000      | 6.5027          |
| -0.0030000      | 6.3582          |
| 0.0020000       | 6.1885          |
| 0.0070000       | 5.9976          |
| 0.012000        | 5.7894          |
| 0.017000        | 5.5710          |
| 0.022000        | 5.3465          |
| 0.027000        | 5.1190          |
| 0.032000        | 4.8904          |
| 0.037000        | 4.6630          |
| 0.042000        | 4.4402          |
| 0.047000        | 4.2225          |
| 0.052000        | 4.0104          |
| 0.057000        | 3.8056          |

| <b>Column 1</b> | <b>Column 2</b> |
|-----------------|-----------------|
| 0.062000        | 3.6079          |
| 0.067000        | 3.4174          |
| 0.072000        | 3.2352          |
| 0.077000        | 3.0603          |
| 0.082000        | 2.8936          |
| 0.087000        | 2.7351          |
| 0.092000        | 2.5842          |
| 0.097000        | 2.4401          |
| 0.10200         | 2.3026          |
| 0.10700         | 2.1730          |
| 0.11200         | 2.0507          |
| 0.11700         | 1.9346          |
| 0.12200         | 1.8241          |
| 0.12700         | 1.7195          |
| 0.13200         | 1.6207          |
| 0.13700         | 1.5284          |
| 0.14200         | 1.4404          |
| 0.14700         | 1.3576          |
| 0.15200         | 1.2796          |
| 0.15700         | 1.2057          |
| 0.16200         | 1.1367          |
| 0.16700         | 1.0706          |
| 0.17200         | 1.0096          |
| 0.17700         | 0.95033         |
| 0.18200         | 0.89718         |
| 0.18700         | 0.84438         |
| 0.19200         | 0.79772         |
| 0.19700         | 0.74857         |
| 0.19800         | 0.70778         |
| 0.19300         | 0.62333         |
| 0.18800         | 0.61232         |
| 0.18300         | 0.56601         |
| 0.17800         | 0.53108         |
| 0.17300         | 0.49680         |
| 0.16800         | 0.46399         |



| <b>Column 1</b> | <b>Column 2</b> |
|-----------------|-----------------|
| 0.16300         | 0.43545         |
| 0.15800         | 0.40596         |
| 0.15300         | 0.38063         |
| 0.14800         | 0.35491         |
| 0.14300         | 0.33123         |
| 0.13800         | 0.30815         |
| 0.13300         | 0.28723         |
| 0.12800         | 0.26680         |
| 0.12300         | 0.24716         |
| 0.11800         | 0.22843         |
| 0.11300         | 0.20956         |
| 0.10800         | 0.19179         |
| 0.10300         | 0.17452         |
| 0.098000        | 0.15797         |
| 0.093000        | 0.14061         |
| 0.088000        | 0.12362         |
| 0.083000        | 0.10616         |
| 0.078000        | 0.087600        |
| 0.073000        | 0.067900        |
| 0.068000        | 0.046400        |
| 0.063000        | 0.022730        |
| 0.058000        | -0.0034300      |
| 0.053000        | -0.032360       |
| 0.048000        | -0.065920       |
| 0.043000        | -0.10492        |
| 0.038000        | -0.14995        |
| 0.033000        | -0.20247        |
| 0.028000        | -0.26578        |
| 0.023000        | -0.34065        |
| 0.018000        | -0.42718        |
| 0.013000        | -0.52853        |
| 0.0080000       | -0.64749        |
| 0.0030000       | -0.78787        |
| -0.0020000      | -0.95378        |
| -0.0070000      | -1.1450         |

| <b>Column 1</b> | <b>Column 2</b> |
|-----------------|-----------------|
| -0.012000       | -1.3623         |
| -0.017000       | -1.6096         |
| -0.022000       | -1.8891         |
| -0.027000       | -2.2020         |
| -0.032000       | -2.5475         |
| -0.037000       | -2.9226         |
| -0.042000       | -3.3239         |
| -0.047000       | -3.7484         |
| -0.052000       | -4.1909         |
| -0.057000       | -4.6415         |
| -0.062000       | -5.0922         |
| -0.067000       | -5.5353         |
| -0.072000       | -5.9596         |
| -0.077000       | -6.3560         |
| -0.082000       | -6.7161         |
| -0.087000       | -7.0312         |
| -0.092000       | -7.2963         |
| -0.097000       | -7.5071         |
| -0.10200        | -7.6598         |
| -0.10700        | -7.7517         |
| -0.11200        | -7.7818         |
| -0.11700        | -7.7540         |
| -0.12200        | -7.6715         |
| -0.12700        | -7.5381         |
| -0.13200        | -7.3591         |
| -0.13700        | -7.1392         |
| -0.14200        | -6.8839         |
| -0.14700        | -6.6004         |
| -0.15200        | -6.2948         |
| -0.15700        | -5.9733         |
| -0.16200        | -5.6437         |
| -0.16700        | -5.3099         |
| -0.17200        | -4.9757         |
| -0.17700        | -4.6460         |
| -0.18200        | -4.3267         |

| <b>Column 1</b> | <b>Column 2</b> |
|-----------------|-----------------|
| -0.18700        | -4.0196         |
| -0.19200        | -3.7243         |
| -0.19700        | -3.4444         |
| -0.20200        | -3.1810         |
| -0.20700        | -2.9337         |
| -0.21200        | -2.7021         |
| -0.21700        | -2.4861         |
| -0.22200        | -2.2864         |
| -0.22700        | -2.1025         |
| -0.23200        | -1.9334         |
| -0.23700        | -1.7781         |
| -0.24200        | -1.6351         |
| -0.24700        | -1.5039         |
| -0.25200        | -1.3836         |
| -0.25700        | -1.2731         |
| -0.26200        | -1.1728         |
| -0.26700        | -1.0798         |
| -0.27200        | -0.99454        |
| -0.27700        | -0.91652        |
| -0.28200        | -0.84547        |
| -0.28700        | -0.77991        |
| -0.29200        | -0.72017        |
| -0.29700        | -0.66553        |
| -0.30200        | -0.61429        |
| -0.30700        | -0.56835        |
| -0.31200        | -0.52616        |
| -0.31700        | -0.48832        |
| -0.32200        | -0.45134        |
| -0.32700        | -0.41996        |
| -0.33200        | -0.38880        |
| -0.33700        | -0.36204        |
| -0.34200        | -0.33760        |
| -0.34700        | -0.30939        |

### 8.3.31 CV-42

| Column 1 | Column 2   |
|----------|------------|
| -0.34800 | -0.29552   |
| -0.34300 | -0.27808   |
| -0.33800 | -0.23385   |
| -0.33300 | -0.22025   |
| -0.32800 | -0.20136   |
| -0.32300 | -0.18530   |
| -0.31800 | -0.17131   |
| -0.31300 | -0.15620   |
| -0.30800 | -0.14457   |
| -0.30300 | -0.13133   |
| -0.29800 | -0.12077   |
| -0.29300 | -0.11003   |
| -0.28800 | -0.10035   |
| -0.28300 | -0.090160  |
| -0.27800 | -0.081050  |
| -0.27300 | -0.072150  |
| -0.26800 | -0.062750  |
| -0.26300 | -0.053850  |
| -0.25800 | -0.044480  |
| -0.25300 | -0.034810  |
| -0.24800 | -0.024400  |
| -0.24300 | -0.013990  |
| -0.23800 | -0.0017000 |
| -0.23300 | 0.011890   |
| -0.22800 | 0.026760   |
| -0.22300 | 0.043310   |
| -0.21800 | 0.062750   |
| -0.21300 | 0.085270   |
| -0.20800 | 0.11109    |
| -0.20300 | 0.14188    |
| -0.19800 | 0.17704    |
| -0.19300 | 0.21808    |
| -0.18800 | 0.26635    |
| -0.18300 | 0.32207    |

| <b>Column 1</b> | <b>Column 2</b> |
|-----------------|-----------------|
| -0.17800        | 0.38614         |
| -0.17300        | 0.46051         |
| -0.16800        | 0.54621         |
| -0.16300        | 0.64392         |
| -0.15800        | 0.75497         |
| -0.15300        | 0.88121         |
| -0.14800        | 1.0233          |
| -0.14300        | 1.1825          |
| -0.13800        | 1.3613          |
| -0.13300        | 1.5595          |
| -0.12800        | 1.7800          |
| -0.12300        | 2.0247          |
| -0.11800        | 2.2932          |
| -0.11300        | 2.5872          |
| -0.10800        | 2.9080          |
| -0.10300        | 3.2560          |
| -0.098000       | 3.6304          |
| -0.093000       | 4.0309          |
| -0.088000       | 4.4550          |
| -0.083000       | 4.8990          |
| -0.078000       | 5.3581          |
| -0.073000       | 5.8251          |
| -0.068000       | 6.2903          |
| -0.063000       | 6.7431          |
| -0.058000       | 7.1709          |
| -0.053000       | 7.5600          |
| -0.048000       | 7.8967          |
| -0.043000       | 8.1661          |
| -0.038000       | 8.3571          |
| -0.033000       | 8.4636          |
| -0.028000       | 8.4813          |
| -0.023000       | 8.4117          |
| -0.018000       | 8.2605          |
| -0.013000       | 8.0370          |
| -0.0080000      | 7.7530          |

| <b>Column 1</b> | <b>Column 2</b> |
|-----------------|-----------------|
| -0.0030000      | 7.4215          |
| 0.0020000       | 7.0554          |
| 0.0070000       | 6.6636          |
| 0.012000        | 6.2575          |
| 0.017000        | 5.8482          |
| 0.022000        | 5.4418          |
| 0.027000        | 5.0443          |
| 0.032000        | 4.6597          |
| 0.037000        | 4.2920          |
| 0.042000        | 3.9430          |
| 0.047000        | 3.6136          |
| 0.052000        | 3.3048          |
| 0.057000        | 3.0163          |
| 0.062000        | 2.7488          |
| 0.067000        | 2.5016          |
| 0.072000        | 2.2739          |
| 0.077000        | 2.0634          |
| 0.082000        | 1.8705          |
| 0.087000        | 1.6950          |
| 0.092000        | 1.5349          |
| 0.097000        | 1.3889          |
| 0.10200         | 1.2559          |
| 0.10700         | 1.1354          |
| 0.11200         | 1.0267          |
| 0.11700         | 0.92847         |
| 0.12200         | 0.83916         |
| 0.12700         | 0.75897         |
| 0.13200         | 0.68610         |
| 0.13700         | 0.62128         |
| 0.14200         | 0.56243         |
| 0.14700         | 0.50939         |
| 0.15200         | 0.46268         |
| 0.15700         | 0.41977         |
| 0.16200         | 0.38215         |
| 0.16700         | 0.34787         |

| <b>Column 1</b> | <b>Column 2</b> |
|-----------------|-----------------|
| 0.17200         | 0.31881         |
| 0.17700         | 0.29038         |
| 0.18200         | 0.26772         |
| 0.18700         | 0.24596         |
| 0.19200         | 0.22786         |
| 0.19700         | 0.20972         |
| 0.19800         | 0.17619         |
| 0.19300         | 0.14532         |
| 0.18800         | 0.14748         |
| 0.18300         | 0.12794         |
| 0.17800         | 0.11542         |
| 0.17300         | 0.10404         |
| 0.16800         | 0.093220        |
| 0.16300         | 0.084640        |
| 0.15800         | 0.075240        |
| 0.15300         | 0.068160        |
| 0.14800         | 0.060870        |
| 0.14300         | 0.054280        |
| 0.13800         | 0.047570        |
| 0.13300         | 0.041580        |
| 0.12800         | 0.035180        |
| 0.12300         | 0.028650        |
| 0.11800         | 0.022480        |
| 0.11300         | 0.015410        |
| 0.10800         | 0.0074600       |
| 0.10300         | -8.1825E-4      |
| 0.098000        | -0.0096100      |
| 0.093000        | -0.020600       |
| 0.088000        | -0.032780       |
| 0.083000        | -0.046790       |
| 0.078000        | -0.063050       |
| 0.073000        | -0.082000       |
| 0.068000        | -0.10476        |
| 0.063000        | -0.13196        |
| 0.058000        | -0.16459        |

| <b>Column 1</b> | <b>Column 2</b> |
|-----------------|-----------------|
| 0.053000        | -0.20318        |
| 0.048000        | -0.24958        |
| 0.043000        | -0.30547        |
| 0.038000        | -0.37185        |
| 0.033000        | -0.45084        |
| 0.028000        | -0.54518        |
| 0.023000        | -0.65669        |
| 0.018000        | -0.78926        |
| 0.013000        | -0.94630        |
| 0.0080000       | -1.1292         |
| 0.0030000       | -1.3443         |
| -0.0020000      | -1.5962         |
| -0.0070000      | -1.8836         |
| -0.012000       | -2.2098         |
| -0.017000       | -2.5790         |
| -0.022000       | -2.9920         |
| -0.027000       | -3.4470         |
| -0.032000       | -3.9401         |
| -0.037000       | -4.4680         |
| -0.042000       | -5.0218         |
| -0.047000       | -5.5913         |
| -0.052000       | -6.1665         |
| -0.057000       | -6.7311         |
| -0.062000       | -7.2700         |
| -0.067000       | -7.7699         |
| -0.072000       | -8.2156         |
| -0.077000       | -8.5941         |
| -0.082000       | -8.8941         |
| -0.087000       | -9.1065         |
| -0.092000       | -9.2266         |
| -0.097000       | -9.2535         |
| -0.10200        | -9.1876         |
| -0.10700        | -9.0306         |
| -0.11200        | -8.7919         |
| -0.11700        | -8.4786         |



| <b>Column 1</b> | <b>Column 2</b> |
|-----------------|-----------------|
| -0.12200        | -8.0971         |
| -0.12700        | -7.6657         |
| -0.13200        | -7.1990         |
| -0.13700        | -6.7095         |
| -0.14200        | -6.2095         |
| -0.14700        | -5.7080         |
| -0.15200        | -5.2147         |
| -0.15700        | -4.7360         |
| -0.16200        | -4.2785         |
| -0.16700        | -3.8460         |
| -0.17200        | -3.4406         |
| -0.17700        | -3.0657         |
| -0.18200        | -2.7234         |
| -0.18700        | -2.4138         |
| -0.19200        | -2.1346         |
| -0.19700        | -1.8838         |
| -0.20200        | -1.6604         |
| -0.20700        | -1.4620         |
| -0.21200        | -1.2862         |
| -0.21700        | -1.1310         |
| -0.22200        | -0.99392        |
| -0.22700        | -0.87352        |
| -0.23200        | -0.76802        |
| -0.23700        | -0.67493        |
| -0.24200        | -0.59319        |
| -0.24700        | -0.52209        |
| -0.25200        | -0.45948        |
| -0.25700        | -0.40434        |
| -0.26200        | -0.35687        |
| -0.26700        | -0.31478        |
| -0.27200        | -0.27813        |
| -0.27700        | -0.24612        |
| -0.28200        | -0.21815        |
| -0.28700        | -0.19370        |
| -0.29200        | -0.17259        |

| Column 1 | Column 2  |
|----------|-----------|
| -0.29700 | -0.15423  |
| -0.30200 | -0.13785  |
| -0.30700 | -0.12412  |
| -0.31200 | -0.11214  |
| -0.31700 | -0.10248  |
| -0.32200 | -0.092690 |
| -0.32700 | -0.085900 |
| -0.33200 | -0.078860 |
| -0.33700 | -0.073720 |
| -0.34200 | -0.070160 |
| -0.34700 | -0.061920 |

### 8.3.32 CV-43

| Column 1  | Column 2   |
|-----------|------------|
| -0.29552  | -0.056750  |
| -0.27808  | -0.051030  |
| -0.23385  | -0.037870  |
| -0.22025  | -0.035390  |
| -0.20136  | -0.030250  |
| -0.18530  | -0.026400  |
| -0.17131  | -0.023500  |
| -0.15620  | -0.019820  |
| -0.14457  | -0.017210  |
| -0.13133  | -0.013930  |
| -0.12077  | -0.011630  |
| -0.11003  | -0.0089300 |
| -0.10035  | -0.0059100 |
| -0.090160 | -0.0025800 |
| -0.081050 | 5.5869E-4  |
| -0.072150 | 0.0042300  |
| -0.062750 | 0.0086500  |
| -0.053850 | 0.013150   |
| -0.044480 | 0.018470   |
| -0.034810 | 0.025140   |
| -0.024400 | 0.032490   |

| <b>Column 1</b> | <b>Column 2</b> |
|-----------------|-----------------|
| -0.013990       | 0.040470        |
| -0.0017000      | 0.050670        |
| 0.011890        | 0.062930        |
| 0.026760        | 0.077230        |
| 0.043310        | 0.093860        |
| 0.062750        | 0.11405         |
| 0.085270        | 0.13824         |
| 0.11109         | 0.16679         |
| 0.14188         | 0.20093         |
| 0.17704         | 0.24052         |
| 0.21808         | 0.28715         |
| 0.26635         | 0.34242         |
| 0.32207         | 0.40658         |
| 0.38614         | 0.48097         |
| 0.46051         | 0.56762         |
| 0.54621         | 0.66756         |
| 0.64392         | 0.78194         |
| 0.75497         | 0.91265         |
| 0.88121         | 1.0618          |
| 1.0233          | 1.2303          |
| 1.1825          | 1.4206          |
| 1.3613          | 1.6359          |
| 1.5595          | 1.8773          |
| 1.7800          | 2.1476          |
| 2.0247          | 2.4497          |
| 2.2932          | 2.7853          |
| 2.5872          | 3.1578          |
| 2.9080          | 3.5692          |
| 3.2560          | 4.0214          |
| 3.6304          | 4.5139          |
| 4.0309          | 5.0461          |
| 4.4550          | 5.6151          |
| 4.8990          | 6.2142          |
| 5.3581          | 6.8357          |
| 5.8251          | 7.4688          |

| <b>Column 1</b> | <b>Column 2</b> |
|-----------------|-----------------|
| 6.2903          | 8.0964          |
| 6.7431          | 8.6977          |
| 7.1709          | 9.2489          |
| 7.5600          | 9.7254          |
| 7.8967          | 10.101          |
| 8.1661          | 10.350          |
| 8.3571          | 10.453          |
| 8.4636          | 10.399          |
| 8.4813          | 10.189          |
| 8.4117          | 9.8311          |
| 8.2605          | 9.3429          |
| 8.0370          | 8.7524          |
| 7.7530          | 8.0883          |
| 7.4215          | 7.3834          |
| 7.0554          | 6.6670          |
| 6.6636          | 5.9540          |
| 6.2575          | 5.2666          |
| 5.8482          | 4.6226          |
| 5.4418          | 4.0291          |
| 5.0443          | 3.4901          |
| 4.6597          | 3.0062          |
| 4.2920          | 2.5777          |
| 3.9430          | 2.2010          |
| 3.6136          | 1.8730          |
| 3.3048          | 1.5906          |
| 3.0163          | 1.3475          |
| 2.7488          | 1.1397          |
| 2.5016          | 0.96370         |
| 2.2739          | 0.81517         |
| 2.0634          | 0.68974         |
| 1.8705          | 0.58423         |
| 1.6950          | 0.49630         |
| 1.5349          | 0.42328         |
| 1.3889          | 0.36245         |
| 1.2559          | 0.31246         |

| <b>Column 1</b> | <b>Column 2</b> |
|-----------------|-----------------|
| 1.1354          | 0.27115         |
| 1.0267          | 0.23663         |
| 0.92847         | 0.20908         |
| 0.83916         | 0.18674         |
| 0.75897         | 0.16831         |
| 0.68610         | 0.15330         |
| 0.62128         | 0.14168         |
| 0.56243         | 0.13202         |
| 0.50939         | 0.12421         |
| 0.46268         | 0.11815         |
| 0.41977         | 0.11254         |
| 0.38215         | 0.10812         |
| 0.34787         | 0.10449         |
| 0.31881         | 0.10149         |
| 0.29038         | 0.097440        |
| 0.26772         | 0.094740        |
| 0.24596         | 0.091720        |
| 0.22786         | 0.089770        |
| 0.20972         | 0.083560        |
| 0.17619         | 0.067430        |
| 0.14532         | 0.051300        |
| 0.14748         | 0.051360        |
| 0.12794         | 0.042790        |
| 0.11542         | 0.036750        |
| 0.10404         | 0.030540        |
| 0.093220        | 0.025400        |
| 0.084640        | 0.020680        |
| 0.075240        | 0.015330        |
| 0.068160        | 0.010460        |
| 0.060870        | 0.0055000       |
| 0.054280        | 6.1494E-4       |
| 0.047570        | -0.0051400      |
| 0.041580        | -0.010830       |
| 0.035180        | -0.017510       |
| 0.028650        | -0.025310       |

| <b>Column 1</b> | <b>Column 2</b> |
|-----------------|-----------------|
| 0.022480        | -0.033180       |
| 0.015410        | -0.042740       |
| 0.0074600       | -0.054210       |
| -8.1825E-4      | -0.067310       |
| -0.0096100      | -0.082610       |
| -0.020600       | -0.10072        |
| -0.032780       | -0.12206        |
| -0.046790       | -0.14735        |
| -0.063050       | -0.17693        |
| -0.082000       | -0.21085        |
| -0.10476        | -0.25038        |
| -0.13196        | -0.29691        |
| -0.16459        | -0.35064        |
| -0.20318        | -0.41238        |
| -0.24958        | -0.48458        |
| -0.30547        | -0.56930        |
| -0.37185        | -0.66960        |
| -0.45084        | -0.78917        |
| -0.54518        | -0.93255        |
| -0.65669        | -1.1050         |
| -0.78926        | -1.3112         |
| -0.94630        | -1.5573         |
| -1.1292         | -1.8457         |
| -1.3443         | -2.1861         |
| -1.5962         | -2.5832         |
| -1.8836         | -3.0281         |
| -2.2098         | -3.5269         |
| -2.5790         | -4.0846         |
| -2.9920         | -4.6943         |
| -3.4470         | -5.3483         |
| -3.9401         | -6.0373         |
| -4.4680         | -6.7473         |
| -5.0218         | -7.4578         |
| -5.5913         | -8.1503         |
| -6.1665         | -8.7980         |

| <b>Column 1</b> | <b>Column 2</b> |
|-----------------|-----------------|
| -6.7311         | -9.3755         |
| -7.2700         | -9.8666         |
| -7.7699         | -10.245         |
| -8.2156         | -10.488         |
| -8.5941         | -10.588         |
| -8.8941         | -10.535         |
| -9.1065         | -10.330         |
| -9.2266         | -9.9830         |
| -9.2535         | -9.5052         |
| -9.1876         | -8.9222         |
| -9.0306         | -8.2637         |
| -8.7919         | -7.5573         |
| -8.4786         | -6.8309         |
| -8.0971         | -6.1041         |
| -7.6657         | -5.3989         |
| -7.1990         | -4.7367         |
| -6.7095         | -4.1297         |
| -6.2095         | -3.5807         |
| -5.7080         | -3.0890         |
| -5.2147         | -2.6562         |
| -4.7360         | -2.2774         |
| -4.2785         | -1.9468         |
| -3.8460         | -1.6611         |
| -3.4406         | -1.4146         |
| -3.0657         | -1.2029         |
| -2.7234         | -1.0220         |
| -2.4138         | -0.86731        |
| -2.1346         | -0.73560        |
| -1.8838         | -0.62380        |
| -1.6604         | -0.52846        |
| -1.4620         | -0.44787        |
| -1.2862         | -0.37976        |
| -1.1310         | -0.32198        |
| -0.99392        | -0.27317        |
| -0.87352        | -0.23246        |

| Column 1  | Column 2  |
|-----------|-----------|
| -0.76802  | -0.19836  |
| -0.67493  | -0.16936  |
| -0.59319  | -0.14530  |
| -0.52209  | -0.12570  |
| -0.45948  | -0.10931  |
| -0.40434  | -0.095600 |
| -0.35687  | -0.084650 |
| -0.31478  | -0.075540 |
| -0.27813  | -0.067930 |
| -0.24612  | -0.061890 |
| -0.21815  | -0.057070 |
| -0.19370  | -0.052940 |
| -0.17259  | -0.049850 |
| -0.15423  | -0.047420 |
| -0.13785  | -0.045410 |
| -0.12412  | -0.044130 |
| -0.11214  | -0.042820 |
| -0.10248  | -0.042140 |
| -0.092690 | -0.041620 |
| -0.085900 | -0.041580 |
| -0.078860 | -0.041380 |
| -0.073720 | -0.041690 |
| -0.070160 | -0.042740 |
| -0.061920 | -0.040250 |

### 8.3.33 Evaluation 2D

Interactive 2D values

| x      | y       | Value   |
|--------|---------|---------|
| 7.0488 | 0.17889 | 0.93308 |
| 1.8028 | 0.86134 | 0.87319 |

### 8.3.34 Table 42

Global Evaluation 1

### 8.3.35 Table 43

Global Evaluation 1



| <b>Time</b> | <b>n_Ox+n_Red (mol)</b> |
|-------------|-------------------------|
| 0.0000      | 8.4824E-14              |

**8.3.36 Table 44**

| <b>Column 1</b> | <b>Column 2</b> |
|-----------------|-----------------|
| 2.7500          | NaN             |
| 5.5000          | NaN             |
| 8.2500          | -0.11000        |
| 11.000          | NaN             |
| 13.750          | -0.10300        |
| 16.500          | NaN             |
| 19.250          | -0.14300        |
| 22.000          | NaN             |
| 24.750          | -0.13800        |
| 27.500          | NaN             |
| 30.250          | -0.13800        |
| 33.000          | NaN             |
| 35.750          | -0.13800        |
| 38.500          | NaN             |
| 41.250          | -0.13300        |
| 44.000          | NaN             |
| 46.750          | -0.13500        |
| 49.500          | NaN             |
| 52.250          | -0.13300        |
| 55.000          | NaN             |
| 57.750          | -0.13000        |
| 60.500          | NaN             |
| 63.250          | -0.12800        |
| 66.000          | NaN             |
| 68.750          | -0.12800        |
| 71.500          | NaN             |
| 74.250          | -0.098000       |
| 77.000          | NaN             |
| 79.750          | -0.11300        |
| 82.500          | NaN             |
| 85.250          | -0.12300        |

| <b>Column 1</b> | <b>Column 2</b> |
|-----------------|-----------------|
| 88.000          | NaN             |
| 90.750          | -0.12300        |
| 93.500          | NaN             |
| 96.250          | -0.12300        |
| 99.000          | NaN             |
| 101.75          | -0.12300        |
| 104.50          | NaN             |
| 107.25          | -0.12300        |
| 110.00          | NaN             |
| 112.75          | -0.11800        |
| 115.50          | NaN             |
| 118.25          | -0.11600        |
| 121.00          | NaN             |
| 123.75          | -0.11400        |
| 126.50          | NaN             |
| 129.25          | -0.11400        |
| 132.00          | NaN             |
| 134.75          | -0.11300        |
| 137.50          | NaN             |
| 140.25          | -0.11000        |
| 143.00          | NaN             |
| 145.75          | -0.11300        |
| 148.50          | NaN             |
| 151.25          | -0.11500        |
| 154.00          | NaN             |
| 156.75          | -0.11200        |
| 159.50          | NaN             |
| 162.25          | -0.11000        |
| 165.00          | NaN             |
| 167.75          | -0.10800        |
| 170.50          | NaN             |
| 173.25          | -0.11000        |
| 176.00          | NaN             |
| 178.75          | -0.088000       |
| 181.50          | NaN             |

| <b>Column 1</b> | <b>Column 2</b> |
|-----------------|-----------------|
| 184.25          | -0.070000       |
| 187.00          | NaN             |
| 189.75          | -0.085000       |
| 192.50          | NaN             |
| 195.25          | -0.081000       |
| 198.00          | NaN             |
| 200.75          | -0.079000       |
| 203.50          | NaN             |
| 206.25          | -0.077000       |
| 209.00          | NaN             |
| 211.75          | -0.072000       |
| 214.50          | NaN             |
| 217.25          | -0.065000       |
| 220.00          | NaN             |
| 222.75          | -0.067000       |
| 225.50          | NaN             |
| 228.25          | -0.062000       |
| 231.00          | NaN             |
| 233.75          | -0.050000       |
| 236.50          | NaN             |
| 239.25          | -0.034000       |
| 242.00          | NaN             |

## 8.4 PLOT GROUPS

### 8.4.1 voltammogramm

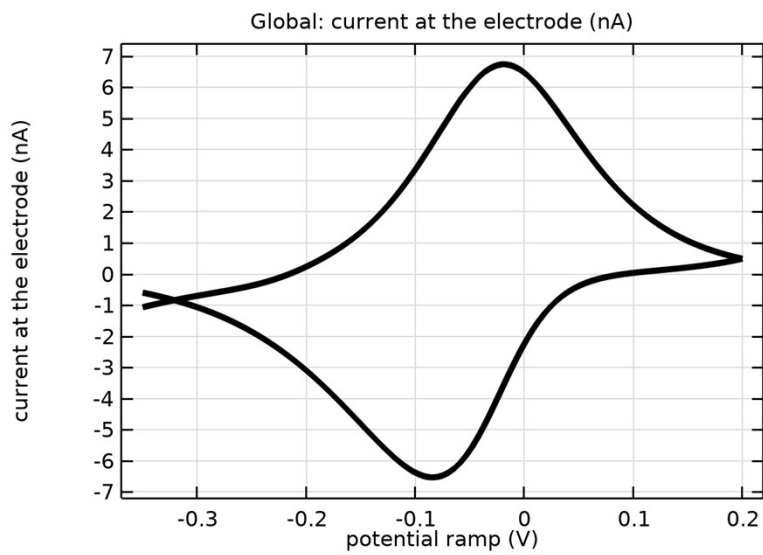

*Global: current at the electrode (nA)*

### 8.4.2 droplet's volume vs time

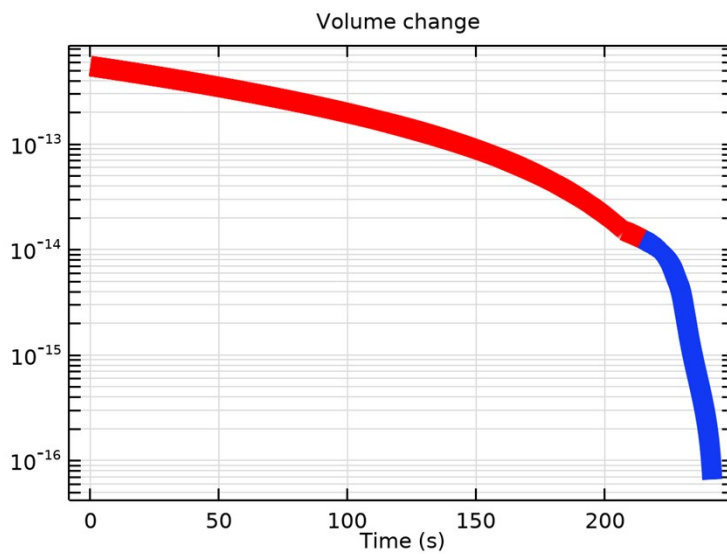

*Volume change*

### 8.4.3 Conservation of matter

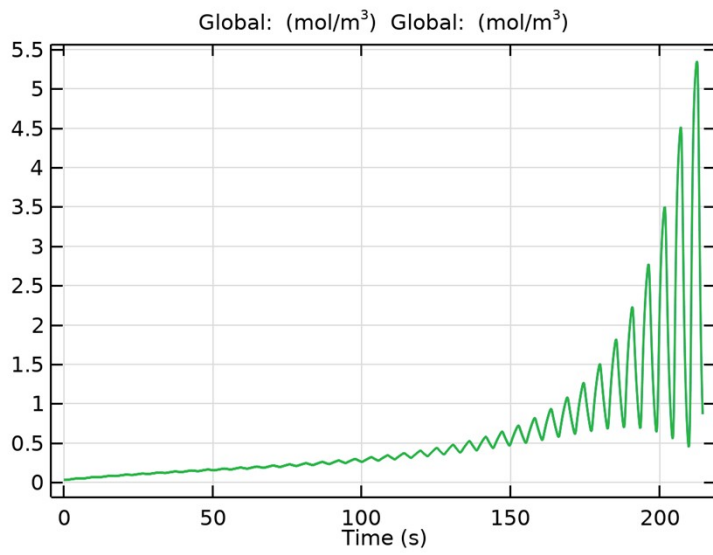

Global: (mol/m<sup>3</sup>) Global: (mol/m<sup>3</sup>) Global: (mol) Global: (mol) Global: (mol)

### 8.4.4 E0'

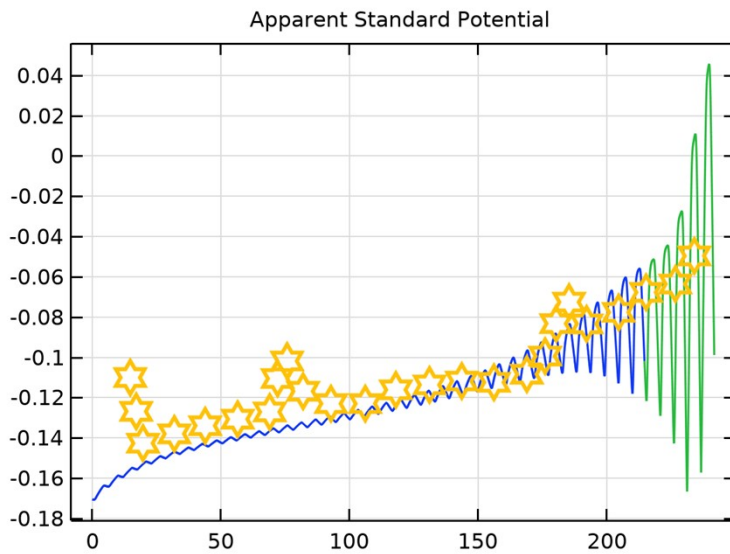

Apparent Standard Potential

### 8.4.5 contact radius

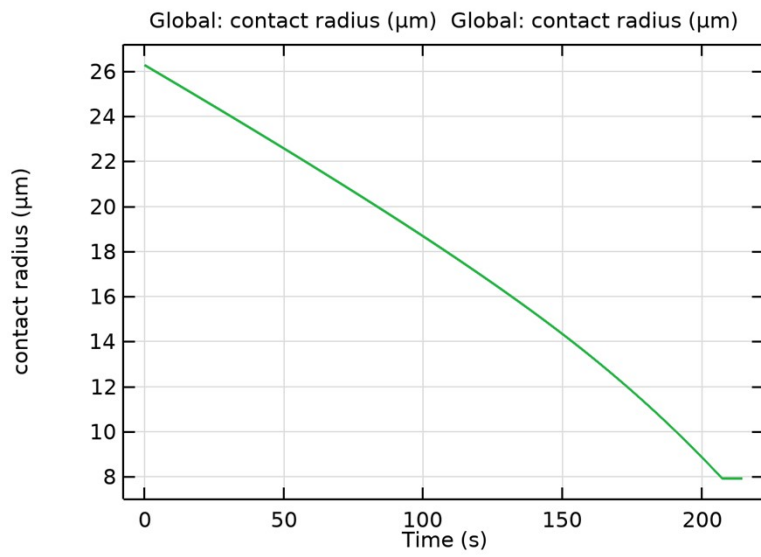

Global: contact radius ( $\mu\text{m}$ ) Global: contact radius ( $\mu\text{m}$ )

### 8.4.6 contact angle

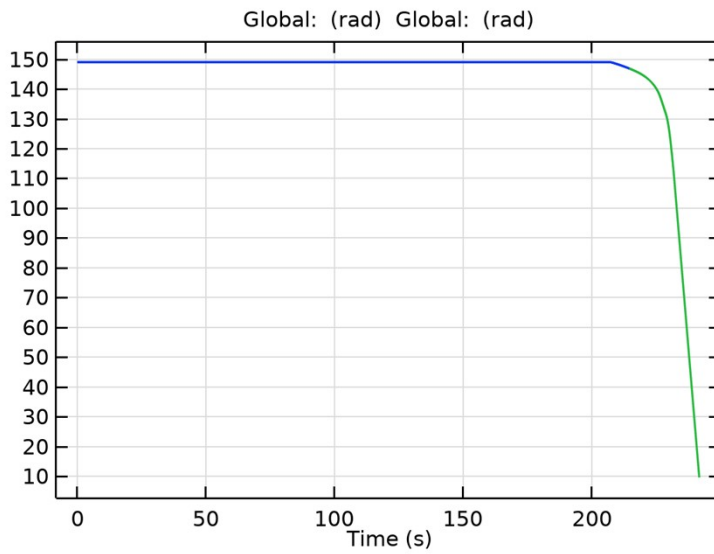

Global: (rad) Global: (rad) Global: (rad) Global: (rad) Global: (rad)

### 8.4.7 radius

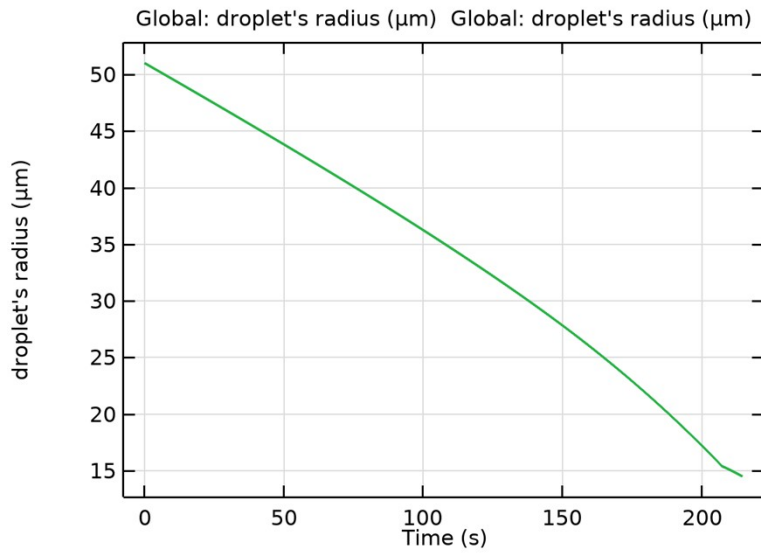

Global: droplet's radius ( $\mu\text{m}$ ) Global: droplet's radius ( $\mu\text{m}$ )

### 8.4.8 Vang

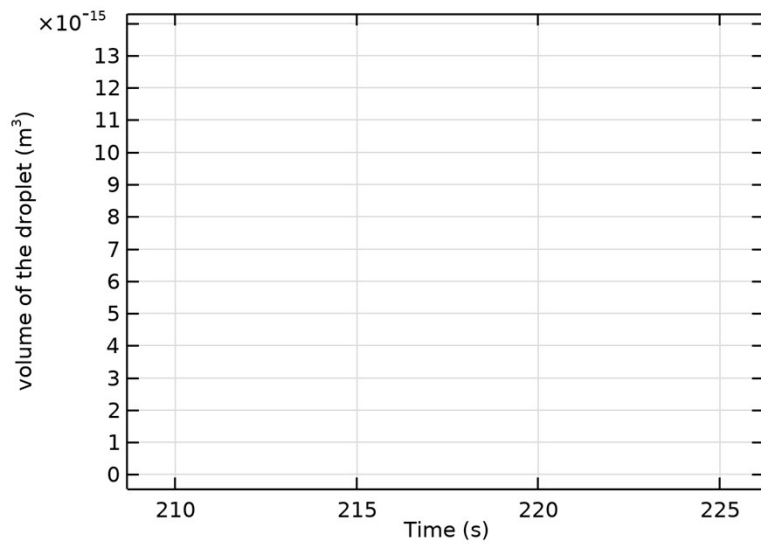

Point Graph: volume of the droplet ( $\text{m}^3$ )

### 8.4.9 E1/2

Global: standard potential corrected from junction potential at water,  
Global: standard potential corrected from junction potential at water,

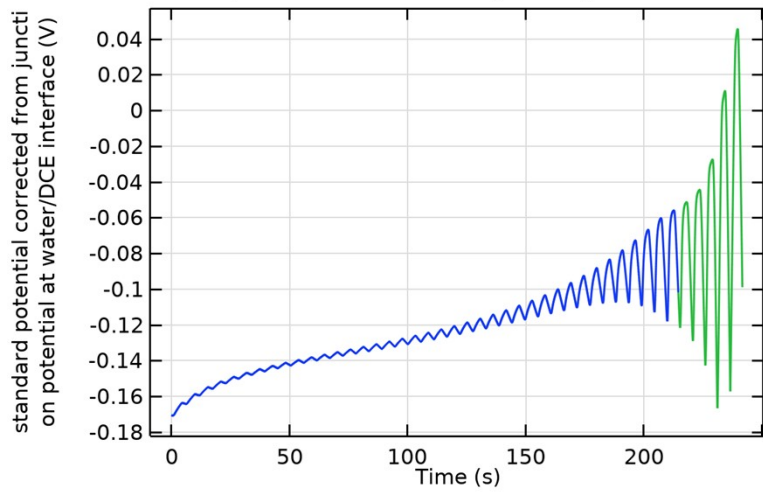

*Global: standard potential corrected from junction potential at water/DCE interface (V) Global: standard potential corrected from junction potential at water/DCE interface (V)*

### 8.4.10 Mesh

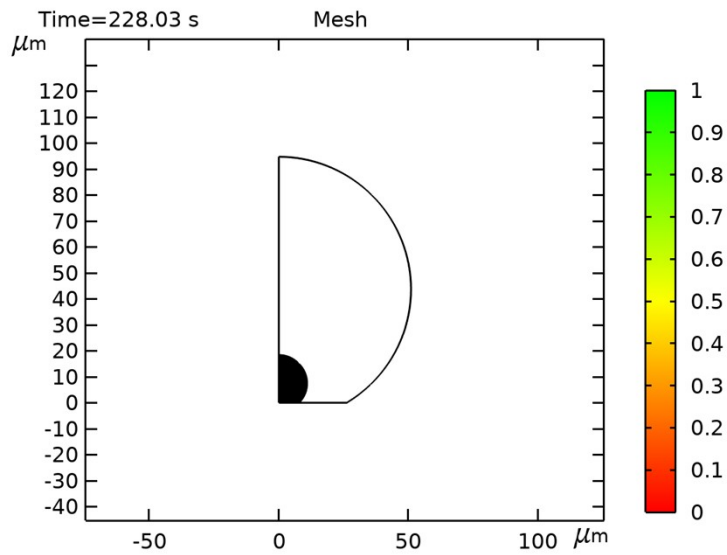

*Mesh*



### 8.4.11 Concentration, Ox (tds)

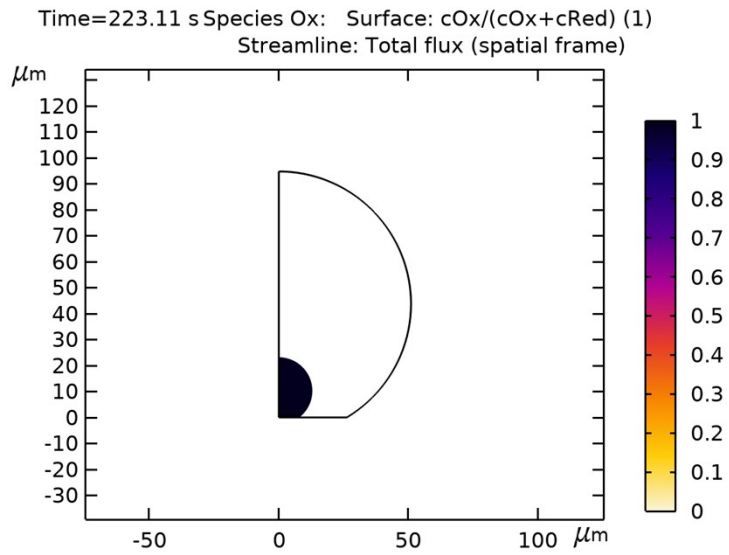

Species Ox: Surface:  $c_{Ox}/(c_{Ox}+c_{Red})$  (1) Streamline: Total flux (spatial frame)

### 8.4.12 Concentration, Ox, 3D (tds)

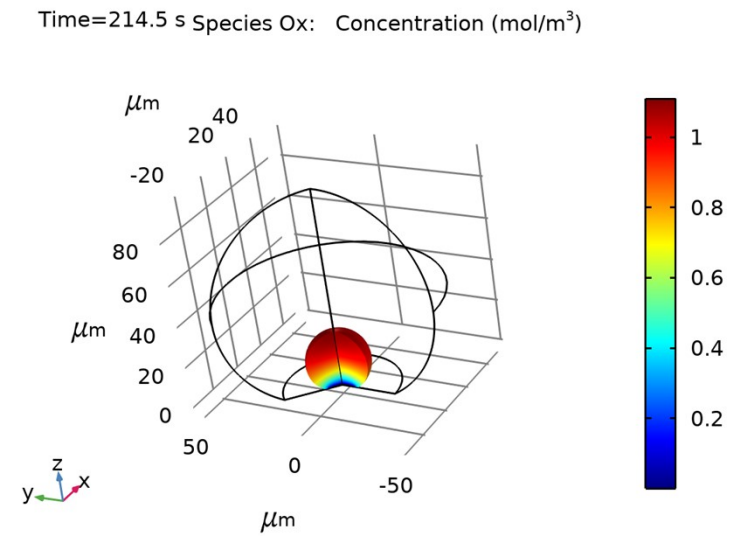

Species Ox: Concentration ( $\text{mol}/\text{m}^3$ )

### 8.4.13 Concentration, Red (tds)

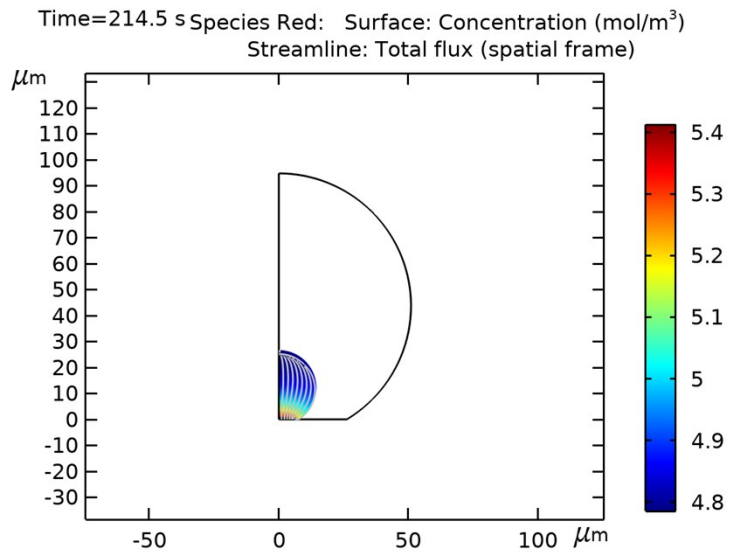

*Species Red: Surface: Concentration (mol/m<sup>3</sup>) Streamline: Total flux (spatial frame)*

### 8.4.14 Concentration, Red, 3D (tds)

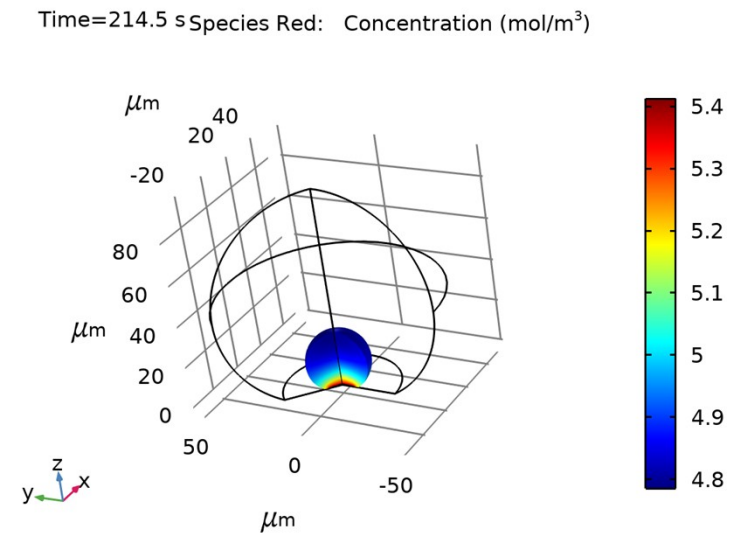

*Species Red: Concentration (mol/m<sup>3</sup>)*

*Species Red: Surface: Concentration (mol/m<sup>3</sup>) Streamline: Total flux (spatial frame)*

### 8.4.15 voltamogramm 1

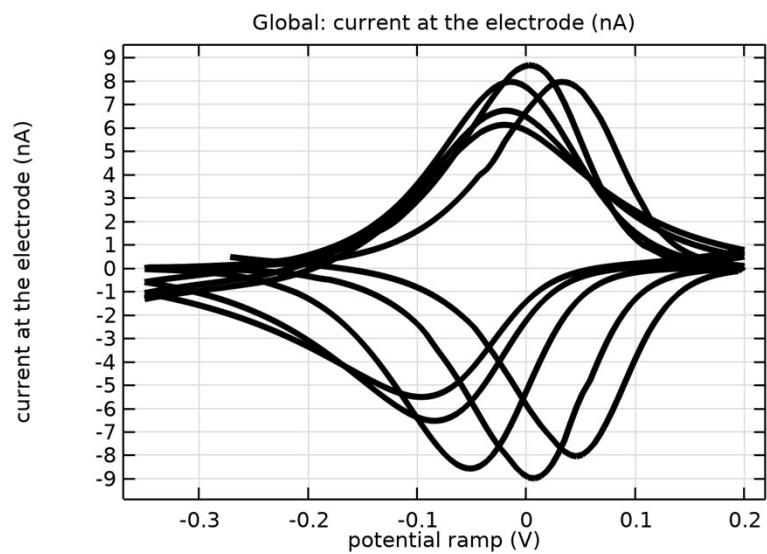

*Global: current at the electrode (nA)*
